# Supplementary material for: Composition and functional profiles of gut microbiota reflect the treatment stage, severity, and etiology of acute pancreatitis
Source: PubMed Central journal article supplement (PMC10580821; doi:10.1128/spectrum.00829-23), 2023-09-12
Supplement: spectrum.00829-23-s0001.pdf [file spectrum.00829-23-s0001.pdf]

## Supplementary Figures

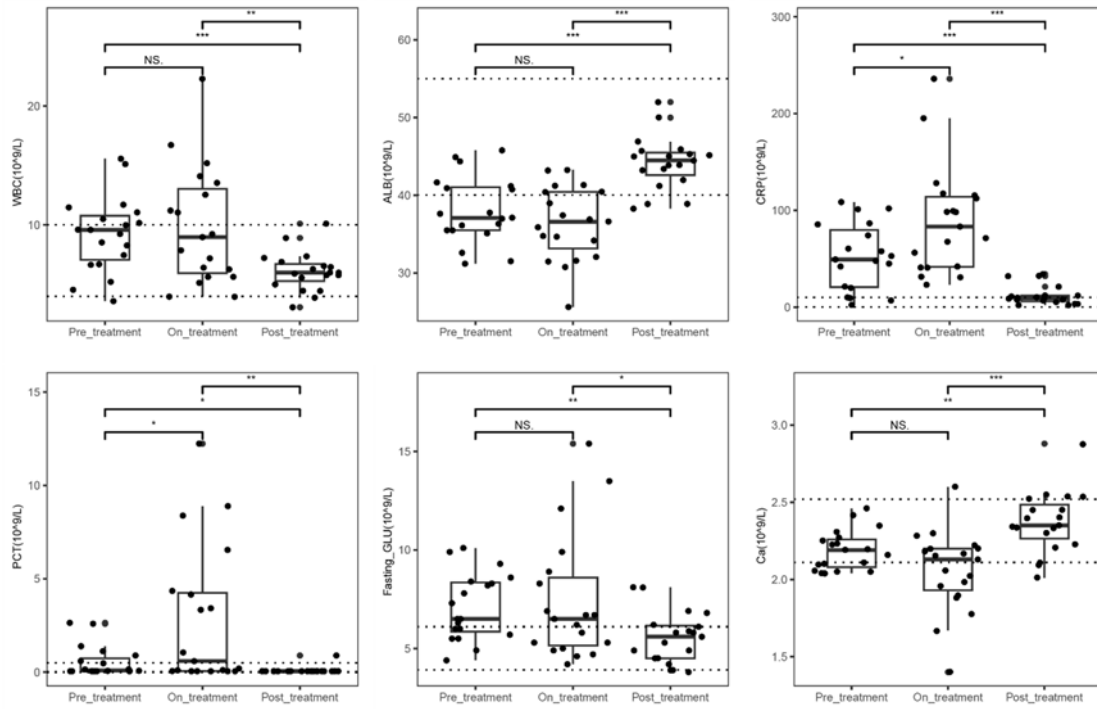

**Figure S1. Clinical indicators variations before, on, and after treatment.** Normal values are between the dashed lines. \* $P < 0.05$ , \*\* $P < 0.01$ , \*\*\* $P < 0.001$ , NS.  $P > 0.05$ .

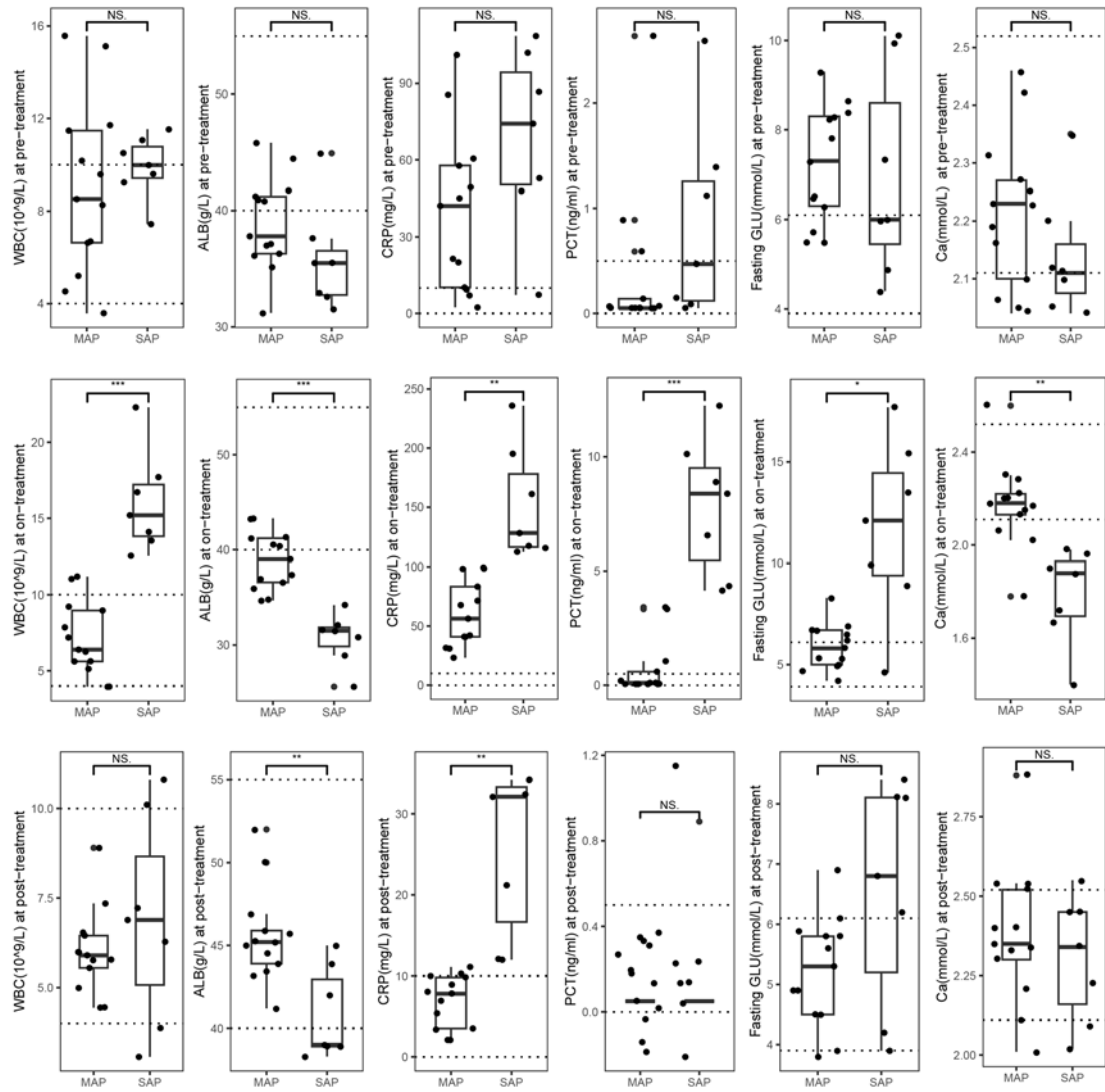

**Figure S2. Differences in all clinical characteristics between MAP and SAP patients.** Normal values are between the dashed lines. \* $P < 0.05$ , \*\* $P < 0.01$ , \*\*\* $P < 0.001$ , NS.  $P > 0.05$ .

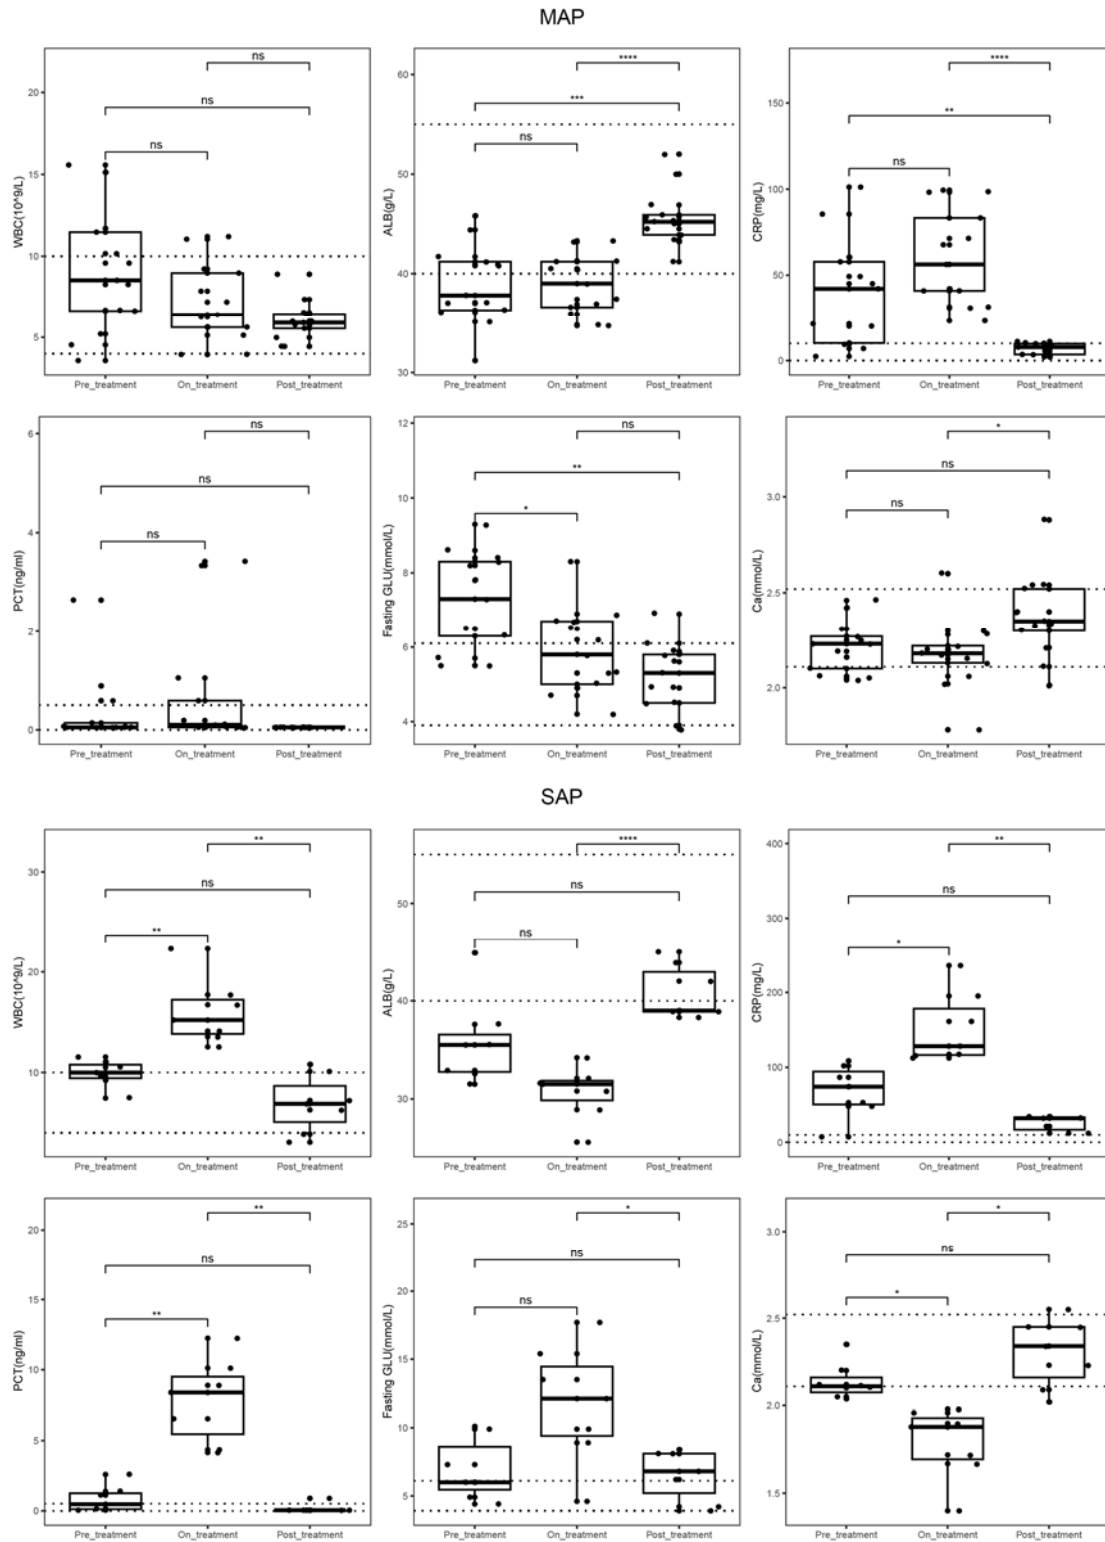

**Figure S3. Clinical indicators variations between MAP and SAP before, on, and after treatment.** Normal values are between the dashed lines. \* $P < 0.05$ , \*\* $P < 0.01$ , \*\*\* $P < 0.001$ , NS.  $P > 0.05$ .

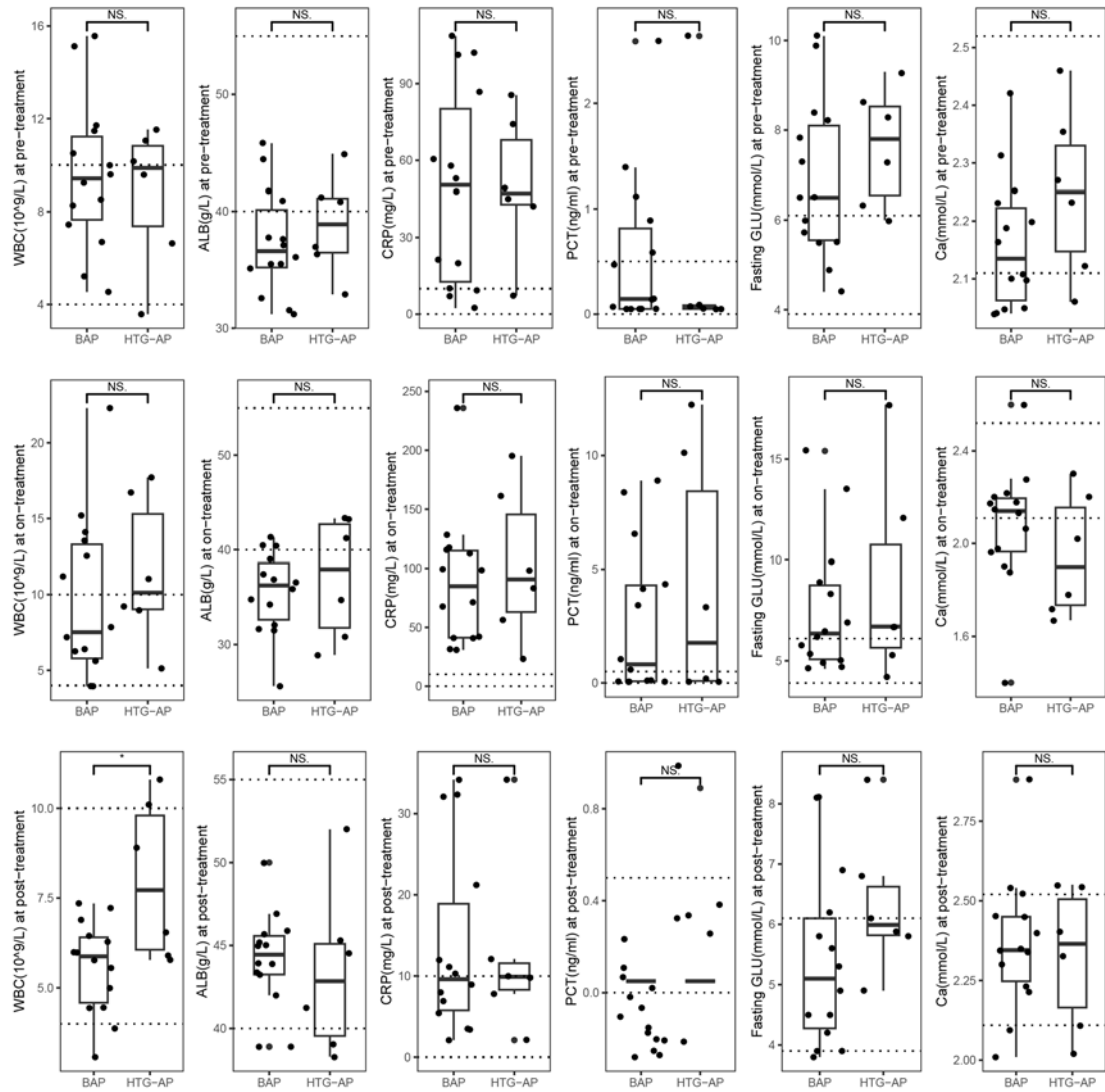

**Figure S4. Differences in all clinical characteristics between BAP and HTG-AP groups.** Normal values are between the dashed lines. \* $P < 0.05$ , \*\* $P < 0.01$ , \*\*\* $P < 0.001$ , NS.  $P > 0.05$ .

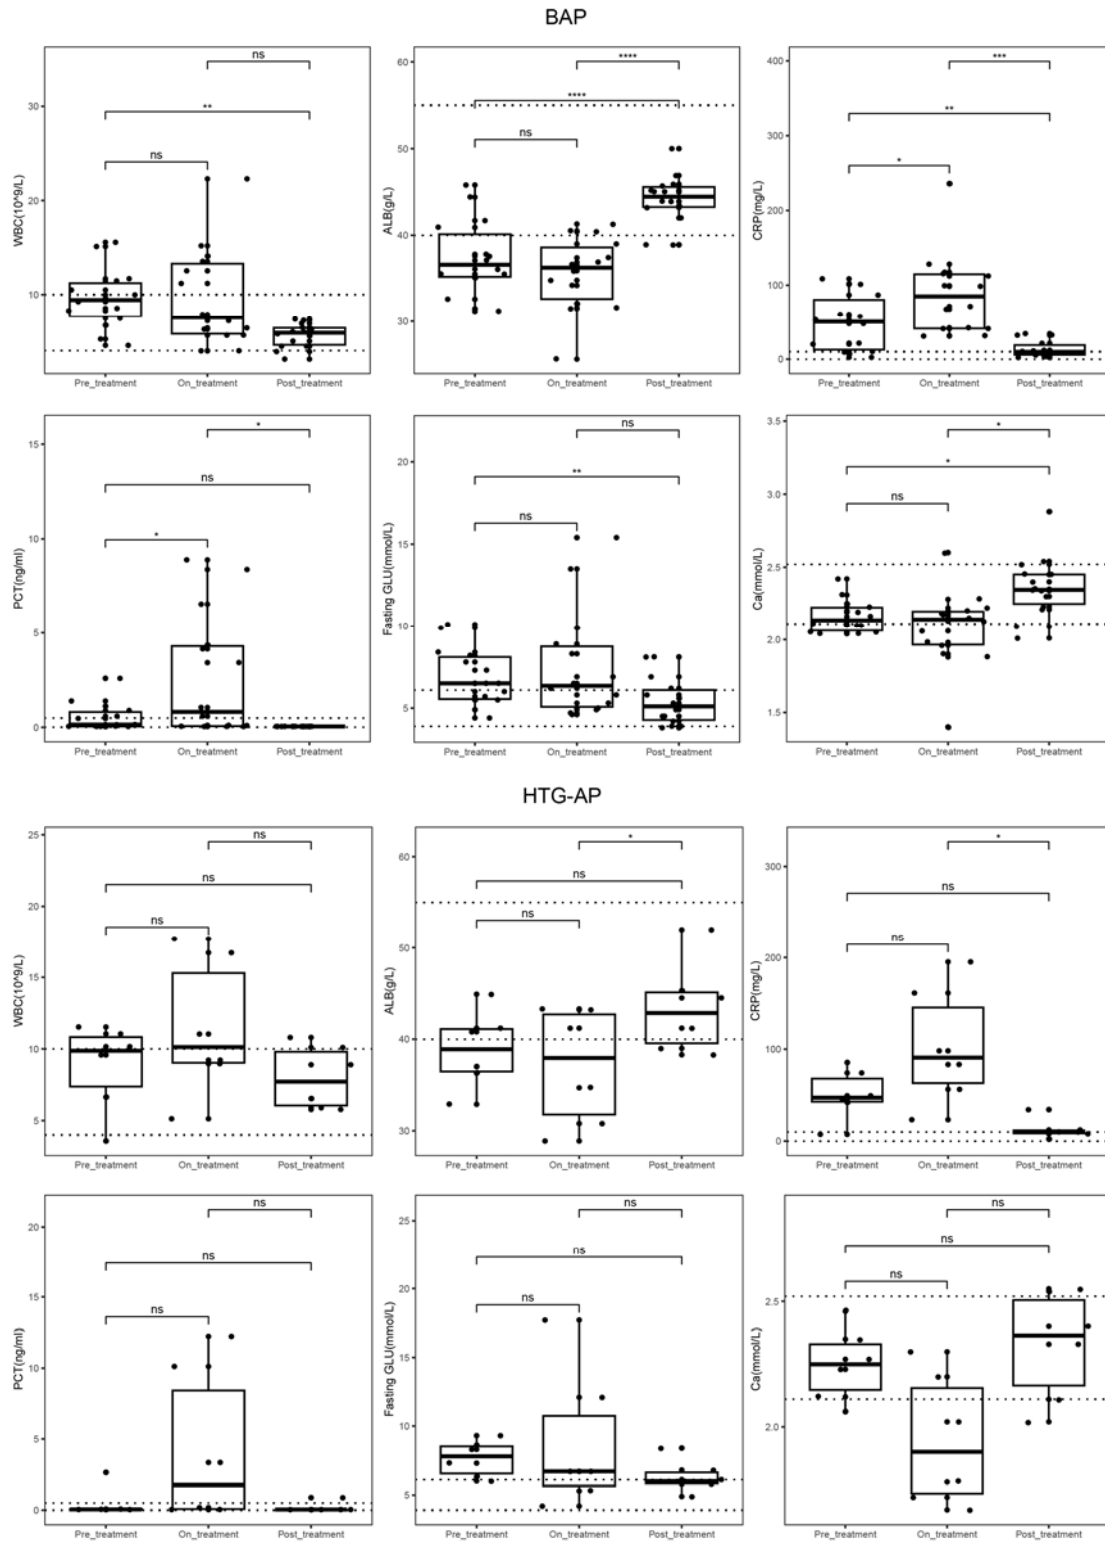

**Figure S5. Variation of clinical indicators with treatment for BAP and HTG-AP samples.** The clinical indexes of MAP and SAP patients before, during, and after treatment. Normal values are between the dashed lines. \* $P < 0.05$ , \*\* $P < 0.01$ , \*\*\* $P < 0.001$ , NS.  $P > 0.05$ .

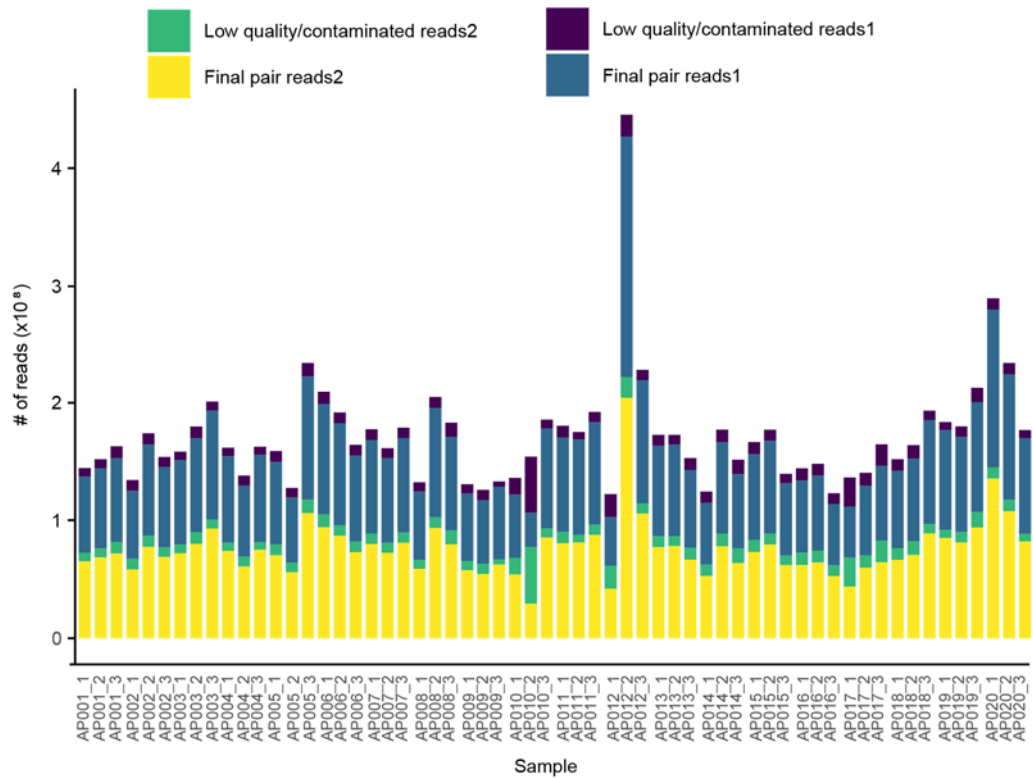

**Figure S6. Quality control.** We collected 60 fecal samples from AP patients at different phases of treatment. The green and purple indicates low quality and contaminated reads. The yellow and blue indicated high quality reads for microbial and functional annotation.

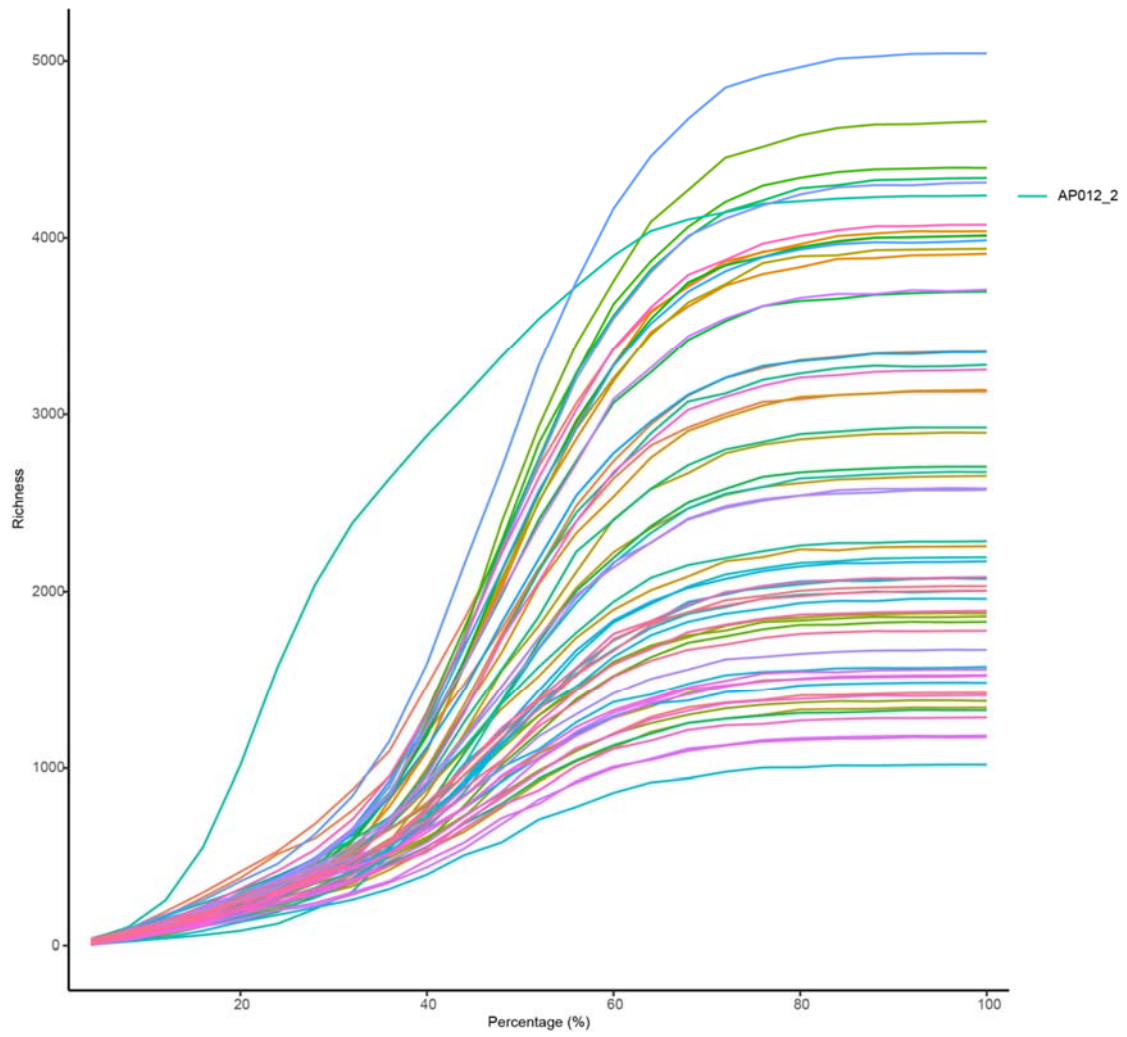

**Figure S7. Rarefaction curve.** Different colors represent different samples. The trend of the curve marked separately (AP012\_2) is different.

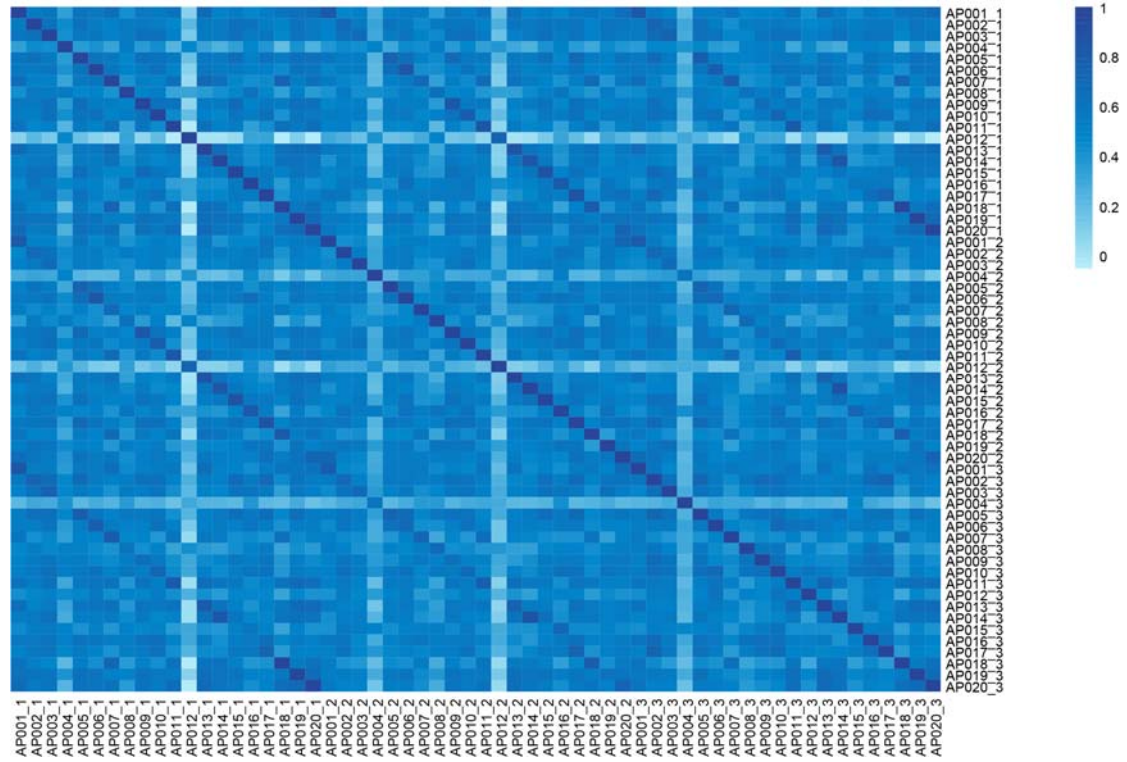

**Figure S8. Spearman correlation of sample.** Blue color from light to dark represents the correlation coefficient from small to large.



**Table S1. Clinical information and biochemical indicators of patients with acute pancreatitis**

| Patient ID | MAP/SARP/HTG-/ | Gender | Age    | Treatment phase | WBC<br>(10 <sup>9</sup> /L)(4-10) | ALB<br>(g/L)(40-55) | CRP<br>(mg/L)(0-10) | PCT<br>(ng/ml)(0-0.5) | Fasting GLU<br>(mmol/L)(3.9-6.1) | Ca<br>(mmol/L)(2.11-2.52) |      |
|------------|----------------|--------|--------|-----------------|-----------------------------------|---------------------|---------------------|-----------------------|----------------------------------|---------------------------|------|
| AP001      | MAP            | BAP    | Male   | 49              | Pre-treatment                     | 5.21                | 44.4                | 9.4                   | 0.05                             | 8.2                       | 2.31 |
|            |                |        |        |                 | On-treatment                      | 6.4                 | 39                  | 41                    | 0.1                              | 5.8                       | 2.22 |
|            |                |        |        |                 | Post-treatment                    | 7.35                | 45                  | 5.4                   | <0.05                            | 4.5                       | 2.35 |
| AP002      | SAP            | BAP    | Male   | 48              | Pre-treatment                     | 9.6                 | 31.5                | 102                   | 1.12                             | 4.9                       | 2.2  |
|            |                |        |        |                 | On-treatment                      | 12.54               | 25.6                | 128.2                 | 8.89                             | 8.9                       | 1.98 |
|            |                |        |        |                 | Post-treatment                    | 7.22                | 38.9                | 12                    | <0.05                            | 4.2                       | 2.23 |
| AP003      | MAP            | BAP    | Male   | 54              | Pre-treatment                     | 11.7                | 31.2                | 10.2                  | 0.89                             | 6.5                       | 2.16 |
|            |                |        |        |                 | On-treatment                      | 3.96                | 37.4                | 98.5                  | 3.42                             | 5.3                       | 2.28 |
|            |                |        |        |                 | Post-treatment                    | 5.55                | 43.4                | 6.9                   | <0.05                            | 5.6                       | 2.88 |
| AP004      | SAP            | BAP    | Female | 49              | Pre-treatment                     | 9.24                | 32.6                | 108.6                 | 0.47                             | 10.1                      | 2.04 |
|            |                |        |        |                 | On-treatment                      | 14.1                | 32.1                | 235.9                 | 4.35                             | 9.9                       | 1.4  |
|            |                |        |        |                 | Post-treatment                    | 3.07                | 45                  | 34.2                  | <0.05                            | 8.11                      | 2.45 |
| AP005      | MAP            | HTG-AP | Male   | 48              | Pre-treatment                     | 9.58                | 40.8                | 45.1                  | 0.07                             | 8.3                       | 2.23 |
|            |                |        |        |                 | On-treatment                      | 11.04               | 41.2                | 98.2                  | 0.19                             | 6.7                       | 2.2  |
|            |                |        |        |                 | Post-treatment                    | 5.78                | 52                  | 9.8                   | <0.05                            | 5.8                       | 2.33 |
| AP006      | MAP            | HTG-AP | Male   | 36              | Pre-treatment                     | 3.58                | 37                  | 85.5                  | 2.64                             | 8.6                       | 2.06 |
|            |                |        |        |                 | On-treatment                      | 8.97                | 34.7                | 83.3                  | 0.05                             | 5.3                       | 1.78 |
|            |                |        |        |                 | Post-treatment                    | 5.9                 | 41.2                | 10                    | <0.05                            | 4.9                       | 2.11 |
| AP007      | SAP            | BAP    | Male   | 34              | Pre-treatment                     | 7.45                | 37.6                | 47.9                  | 2.59                             | 4.4                       | 2.1  |
|            |                |        |        |                 | On-treatment                      | 15.2                | 31.5                | 115.5                 | 6.55                             | 13.5                      | 1.96 |
|            |                |        |        |                 | Post-treatment                    | 6.28                | 42                  | 32.4                  | <0.05                            | 3.9                       | 2.45 |
| AP008      | MAP            | BAP    | Female | 48              | Pre-treatment                     | 6.69                | 35.1                | 7                     | 0.05                             | 5.5                       | 2.25 |
|            |                |        |        |                 | On-treatment                      | 5.62                | 40.4                | 42.1                  | 0.05                             | 4.9                       | 2.2  |
|            |                |        |        |                 | Post-treatment                    | 5.77                | 43.2                | 2.1                   | <0.05                            | 5.8                       | 2.01 |
| AP009      | MAP            | BAP    | Male   | 31              | Pre-treatment                     | 15.12               | 45.8                | 60.5                  | 0.05                             | 7.8                       | 2.42 |
|            |                |        |        |                 | On-treatment                      | 6.26                | 35.9                | 67.7                  | 0.05                             | 6.5                       | 2.6  |
|            |                |        |        |                 | Post-treatment                    | 4.44                | 45.2                | 10.3                  | <0.05                            | 6.9                       | 2.52 |
| AP010      | MAP            | BAP    | Male   | 38              | Pre-treatment                     | 11.47               | 37.8                | 57.8                  | 0.14                             | 6.5                       | 2.19 |
|            |                |        |        |                 | On-treatment                      | 7.19                | 36.9                | 71.4                  | 0.11                             | 5                         | 2.15 |
|            |                |        |        |                 | Post-treatment                    | 5.99                | 43.9                | 8.9                   | <0.05                            | 3.8                       | 2.34 |
| AP011      | MAP            | HTG-AP | Male   | 41              | Pre-treatment                     | 10.16               | 41.2                | 49.3                  | 0.05                             | 9.3                       | 2.27 |
|            |                |        |        |                 | On-treatment                      | 9.22                | 43.2                | 56.3                  | 3.34                             | 6.7                       | 2.02 |
|            |                |        |        |                 | Post-treatment                    | 8.9                 | 44.5                | 7.8                   | <0.05                            | 6.1                       | 2.4  |
| AP012      | SAP            | HTG-AP | Female | 47              | Pre-treatment                     | 11.53               | 32.9                | 7.22                  | 0.05                             | 7.3                       | 2.12 |
|            |                |        |        |                 | On-treatment                      | 17.71               | 28.9                | 161.2                 | 10.12                            | 17.7                      | 1.72 |
|            |                |        |        |                 | Post-treatment                    | 10.8                | 39                  | 34.2                  | <0.05                            | 8.4                       | 2.02 |
| AP013      | MAP            | BAP    | Male   | 53              | Pre-treatment                     | 8.53                | 37.1                | 101.2                 | 0.59                             | 7.3                       | 2.04 |
|            |                |        |        |                 | On-treatment                      | 11.2                | 34.8                | 30.9                  | 0.06                             | 6.2                       | 2.06 |
|            |                |        |        |                 | Post-treatment                    | 4.45                | 46.9                | 3.51                  | <0.05                            | 4.9                       | 2.3  |
| AP014      | SAP            | BAP    | Male   | 86              | Pre-treatment                     | 10.5                | 35.5                | 52.9                  | 1.39                             | 9.9                       | 2.11 |
|            |                |        |        |                 | On-treatment                      | 22.3                | 31.6                | 112.4                 | 8.38                             | 15.4                      | 1.88 |
|            |                |        |        |                 | Post-treatment                    | 3.87                | 38.9                | 32.1                  | <0.05                            | 8.1                       | 2.09 |
| AP015      | SAP            | HTG-AP | Male   | 32              | Pre-treatment                     | 11.05               | 44.9                | 74.2                  | 0.09                             | 6                         | 2.35 |
|            |                |        |        |                 | On-treatment                      | 16.72               | 30.8                | 195.2                 | 12.24                            | 12.1                      | 1.67 |
|            |                |        |        |                 | Post-treatment                    | 10.1                | 38.3                | 12.1                  | 0.89                             | 6.8                       | 2.55 |
| AP016      | MAP            | BAP    | Male   | 60              | Pre-treatment                     | 4.54                | 36.1                | 2.4                   | 0.05                             | 5.5                       | 2.23 |
|            |                |        |        |                 | On-treatment                      | 3.95                | 40.5                | 40.9                  | 1.05                             | 4.7                       | 2.18 |
|            |                |        |        |                 | Post-treatment                    | 5.98                | 45.9                | 3.4                   | <0.05                            | 5.3                       | 2.54 |
| AP017      | MAP            | BAP    | Female | 35              | Pre-treatment                     | 8.27                | 40.9                | 20                    | 0.05                             | 8.4                       | 2.05 |
|            |                |        |        |                 | On-treatment                      | 5.63                | 41.3                | 31.5                  | 0.05                             | 6.9                       | 2.13 |
|            |                |        |        |                 | Post-treatment                    | 6.45                | 50                  | 8                     | <0.05                            | 3.9                       | 2.21 |
| AP018      | SAP            | BAP    | Male   | 67              | Pre-treatment                     | 9.98                | 35.5                | 86.7                  | 0.15                             | 6                         | 2.05 |
|            |                |        |        |                 | On-treatment                      | 13.54               | 34.2                | 117.4                 | 4.15                             | 4.6                       | 1.9  |
|            |                |        |        |                 | Post-treatment                    | 6.89                | 43.9                | 21.2                  | <0.05                            | 6.2                       | 2.34 |
| AP019      | MAP            | BAP    | Male   | 54              | Pre-treatment                     | 15.57               | 41.7                | 21.4                  | 0.07                             | 5.7                       | 2.1  |
|            |                |        |        |                 | On-treatment                      | 7.86                | 36.6                | 99.4                  | 0.59                             | 8.3                       | 2.17 |
|            |                |        |        |                 | Post-treatment                    | 4.99                | 45.7                | 11.1                  | <0.05                            | 4.5                       | 2.4  |
| AP20       | MAP            | HTG-AP | Male   | 53              | Pre-treatment                     | 6.64                | 36.3                | 42.1                  | 0.05                             | 6.3                       | 2.46 |
|            |                |        |        |                 | On-treatment                      | 5.13                | 43.3                | 23.2                  | 0.05                             | 4.2                       | 2.3  |
|            |                |        |        |                 | Post-treatment                    | 6.54                | 45.3                | 2.1                   | <0.05                            | 5.88                      | 2.54 |

MAP: mild acute pancreatitis, SAP: severe acute pancreatitis, BAP: biliary acute pancreatitis, HTG-AP: hypertriglyceridemia-induced acute pancreatitis, WBC: White

**Table S2. Relative taxonomic abundances**

| ID                                             | AP001_1 | AP001_2 | AP001_3 | AP002_1 | AP002_2 | AP002_3 |
|------------------------------------------------|---------|---------|---------|---------|---------|---------|
| k__Bacteria                                    | 100     | 100     | 100     | 100     | 100     | 100     |
| k__Bacteria p__Actinobacteria                  | 1.0178  | 1.63109 | 0.31028 | 0.06147 | 0.09439 | 1.00982 |
| k__Bacteria p__Actinobacteria c__Actinobacteri | 0.92979 | 1.38689 | 0.30128 | 0.00125 | 0.0341  | 0.0177  |
| k__Bacteria p__Actinobacteria c__Actinobacteri | 0.00481 | 0.06846 | 0.01383 | 0.00054 | 0.00826 | 0.00593 |
| k__Bacteria p__Actinobacteria c__Actinobacteri | 0.00481 | 0.06846 | 0.01383 | 0.00054 | 0.00826 | 0.00593 |
| k__Bacteria p__Actinobacteria c__Actinobacteri | 0       | 0       | 0       | 0       | 0       | 0       |
| k__Bacteria p__Actinobacteria c__Actinobacteri | 0       | 0       | 0       | 0       | 0       | 0       |
| k__Bacteria p__Actinobacteria c__Actinobacteri | 0.00481 | 0.06846 | 0.01383 | 0.00054 | 0.00826 | 0.00593 |
| k__Bacteria p__Actinobacteria c__Actinobacteri | 0       | 0       | 0       | 0       | 0       | 0       |
| k__Bacteria p__Actinobacteria c__Actinobacteri | 0       | 0       | 0.00011 | 0       | 0       | 0.00049 |
| k__Bacteria p__Actinobacteria c__Actinobacteri | 0       | 0       | 0       | 0       | 0       | 0       |
| k__Bacteria p__Actinobacteria c__Actinobacteri | 0       | 0       | 0       | 0       | 0       | 0       |
| k__Bacteria p__Actinobacteria c__Actinobacteri | 0       | 0       | 0       | 0       | 0       | 0       |
| k__Bacteria p__Actinobacteria c__Actinobacteri | 0       | 0       | 0       | 0       | 0       | 0       |
| k__Bacteria p__Actinobacteria c__Actinobacteri | 0.0019  | 0.02467 | 0.0066  | 0.00054 | 0.00464 | 0.00124 |
| k__Bacteria p__Actinobacteria c__Actinobacteri | 0       | 0       | 0       | 0       | 0       | 0       |
| k__Bacteria p__Actinobacteria c__Actinobacteri | 0.00055 | 0.0048  | 0.00165 | 0       | 0.00148 | 0.00024 |
| k__Bacteria p__Actinobacteria c__Actinobacteri | 0       | 0.00042 | 0.00038 | 0       | 0.00214 | 0       |
| k__Bacteria p__Actinobacteria c__Actinobacteri | 0.00236 | 0.00438 | 0.00468 | 0       | 0       | 0.00364 |
| k__Bacteria p__Actinobacteria c__Actinobacteri | 0       | 0.03378 | 0.00042 | 0       | 0       | 0       |
| k__Bacteria p__Actinobacteria c__Actinobacteri | 0       | 0       | 0       | 0       | 0       | 0       |
| k__Bacteria p__Actinobacteria c__Actinobacteri | 0       | 0.00043 | 0       | 0       | 0       | 0.00032 |
| k__Bacteria p__Actinobacteria c__Actinobacteri | 0       | 0       | 0       | 0       | 0       | 0       |
| k__Bacteria p__Actinobacteria c__Actinobacteri | 0       | 0       | 0       | 0       | 0       | 0       |
| k__Bacteria p__Actinobacteria c__Actinobacteri | 0       | 0       | 0       | 0       | 0       | 0       |
| k__Bacteria p__Actinobacteria c__Actinobacteri | 0.92385 | 1.30272 | 0.28263 | 0       | 0       | 0.00843 |
| k__Bacteria p__Actinobacteria c__Actinobacteri | 0.92385 | 1.30272 | 0.28263 | 0       | 0       | 0.00843 |
| k__Bacteria p__Actinobacteria c__Actinobacteri | 0       | 0       | 0       | 0       | 0       | 0       |
| k__Bacteria p__Actinobacteria c__Actinobacteri | 0       | 0       | 0       | 0       | 0       | 0       |
| k__Bacteria p__Actinobacteria c__Actinobacteri | 0       | 0       | 0       | 0       | 0       | 0       |
| k__Bacteria p__Actinobacteria c__Actinobacteri | 0       | 0       | 0       | 0       | 0       | 0       |
| k__Bacteria p__Actinobacteria c__Actinobacteri | 0.92385 | 1.30272 | 0.28263 | 0       | 0       | 0.00843 |

|                                                 |         |         |         |         |         |         |
|-------------------------------------------------|---------|---------|---------|---------|---------|---------|
| k__Bacteria p__Actinobacteria c__Actinobacteri  | 0.47385 | 0.32392 | 0.07188 | 0       | 0       | 0       |
| k__Bacteria p__Actinobacteria c__Actinobacteri  | 0       | 0       | 0       | 0       | 0       | 0       |
| k__Bacteria p__Actinobacteria c__Actinobacteri  | 0       | 0       | 0       | 0       | 0       | 0       |
| k__Bacteria p__Actinobacteria c__Actinobacteri  | 0       | 0       | 0       | 0       | 0       | 0       |
| k__Bacteria p__Actinobacteria c__Actinobacteri  | 0       | 0       | 0.00022 | 0       | 0       | 0.00843 |
| k__Bacteria p__Actinobacteria c__Actinobacteri  | 0.45    | 0.9788  | 0.21054 | 0       | 0       | 0       |
| k__Bacteria p__Actinobacteria c__Actinobacteri  | 0       | 0       | 0       | 0       | 0       | 0       |
| k__Bacteria p__Actinobacteria c__Actinobacteri  | 0       | 0       | 0       | 0       | 0       | 0       |
| k__Bacteria p__Actinobacteria c__Actinobacteri  | 0       | 0       | 0       | 0       | 0       | 0       |
| k__Bacteria p__Actinobacteria c__Actinobacteri  | 0       | 0       | 0       | 0       | 0       | 0       |
| k__Bacteria p__Actinobacteria c__Actinobacteri  | 0       | 0       | 0       | 0       | 0       | 0       |
| k__Bacteria p__Actinobacteria c__Actinobacteri  | 0       | 0       | 0       | 0       | 0       | 0       |
| k__Bacteria p__Actinobacteria c__Actinobacteri  | 0       | 0       | 0       | 0       | 0       | 0       |
| k__Bacteria p__Actinobacteria c__Actinobacteri  | 0       | 0       | 0       | 0       | 0       | 0       |
| k__Bacteria p__Actinobacteria c__Actinobacteri  | 0       | 0       | 0       | 0       | 0       | 0       |
| k__Bacteria p__Actinobacteria c__Actinobacteri  | 0.00112 | 0.01571 | 0.00482 | 0.00071 | 0.02584 | 0.00334 |
| k__Bacteria p__Actinobacteria c__Actinobacteri  | 0.00112 | 0.01571 | 0.00482 | 0.00071 | 0.02584 | 0.00334 |
| k__Bacteria p__Actinobacteria c__Actinobacteri  | 0.00112 | 0.01571 | 0.00482 | 0.00071 | 0.02584 | 0.00334 |
| k__Bacteria p__Actinobacteria c__Actinobacteri  | 0       | 0       | 0       | 0       | 0       | 0       |
| k__Bacteria p__Actinobacteria c__Actinobacteri  | 0       | 0       | 0       | 0.00013 | 0       | 0.00076 |
| k__Bacteria p__Actinobacteria c__Actinobacteri  | 0.00112 | 0.01571 | 0.00482 | 0.00058 | 0.02584 | 0.00258 |
| k__Bacteria p__Actinobacteria c__Actinobacteri  | 0       | 0       | 0       | 0       | 0       | 0       |
| k__Bacteria p__Actinobacteria c__Actinobacteri  | 0       | 0       | 0       | 0       | 0       | 0       |
| k__Bacteria p__Actinobacteria c__Actinobacteri  | 0       | 0       | 0       | 0       | 0       | 0       |
| k__Bacteria p__Actinobacteria c__Actinobacteri  | 0       | 0       | 0       | 0       | 0       | 0       |
| k__Bacteria p__Actinobacteria c__Actinobacteri  | 0       | 0       | 0       | 0       | 0       | 0       |
| k__Bacteria p__Actinobacteria c__Actinobacteri  | 0       | 0       | 0       | 0       | 0       | 0       |
| k__Bacteria p__Actinobacteria c__Coriobacteriik | 0.08801 | 0.2442  | 0.009   | 0.06022 | 0.06029 | 0.99211 |
| k__Bacteria p__Actinobacteria c__Coriobacteriik | 0.04425 | 0.19548 | 0.0024  | 0.02522 | 0.05735 | 0.96267 |
| k__Bacteria p__Actinobacteria c__Coriobacteriik | 0.00249 | 0.12558 | 0       | 0       | 0.00027 | 0       |
| k__Bacteria p__Actinobacteria c__Coriobacteriik | 0.00249 | 0.12434 | 0       | 0       | 0       | 0       |
| k__Bacteria p__Actinobacteria c__Coriobacteriik | 0       | 0       | 0       | 0       | 0       | 0       |
| k__Bacteria p__Actinobacteria c__Coriobacteriik | 0       | 0.05898 | 0       | 0       | 0       | 0       |

|                                                 |          |          |          |          |          |          |
|-------------------------------------------------|----------|----------|----------|----------|----------|----------|
| k__Bacteria p__Actinobacteria c__Coriobacteriia | 0.00249  | 0.06536  | 0        | 0        | 0        | 0        |
| k__Bacteria p__Actinobacteria c__Coriobacteriia | 0        | 0.00124  | 0        | 0        | 0.00027  | 0        |
| k__Bacteria p__Actinobacteria c__Coriobacteriia | 0        | 0        | 0        | 0        | 0        | 0        |
| k__Bacteria p__Actinobacteria c__Coriobacteriia | 0        | 0.00124  | 0        | 0        | 0.00027  | 0        |
| k__Bacteria p__Actinobacteria c__Coriobacteriia | 0.04176  | 0.06991  | 0.0024   | 0.02522  | 0.05708  | 0.96267  |
| k__Bacteria p__Actinobacteria c__Coriobacteriia | 0        | 0        | 0        | 0.02522  | 0.05708  | 0.96249  |
| k__Bacteria p__Actinobacteria c__Coriobacteriia | 0        | 0        | 0        | 0.02287  | 0.05708  | 0.61722  |
| k__Bacteria p__Actinobacteria c__Coriobacteriia | 0        | 0        | 0        | 0.00235  | 0        | 0.32828  |
| k__Bacteria p__Actinobacteria c__Coriobacteriia | 0        | 0        | 0        | 0        | 0        | 0.017    |
| k__Bacteria p__Actinobacteria c__Coriobacteriia | 0.04176  | 0.06991  | 0.0024   | 0        | 0        | 0.00018  |
| k__Bacteria p__Actinobacteria c__Coriobacteriia | 0.00037  | 0.00049  | 0        | 0        | 0        | 0.00018  |
| k__Bacteria p__Actinobacteria c__Coriobacteriia | 0.0414   | 0.06941  | 0.0024   | 0        | 0        | 0        |
| k__Bacteria p__Actinobacteria c__Coriobacteriia | 0.04376  | 0.04871  | 0.0066   | 0.035    | 0.00294  | 0.02944  |
| k__Bacteria p__Actinobacteria c__Coriobacteriia | 0.04376  | 0.04871  | 0.0066   | 0.035    | 0.00294  | 0.02944  |
| k__Bacteria p__Actinobacteria c__Coriobacteriia | 0.0156   | 0.01318  | 0.00343  | 0        | 0        | 0        |
| k__Bacteria p__Actinobacteria c__Coriobacteriia | 0.0156   | 0.01318  | 0.00343  | 0        | 0        | 0        |
| k__Bacteria p__Actinobacteria c__Coriobacteriia | 0.00457  | 0.00395  | 0.00089  | 0        | 0        | 0        |
| k__Bacteria p__Actinobacteria c__Coriobacteriia | 0.00457  | 0.00395  | 0.00089  | 0        | 0        | 0        |
| k__Bacteria p__Actinobacteria c__Coriobacteriia | 0.02116  | 0.02805  | 0.00174  | 0.03258  | 0.00294  | 0.02605  |
| k__Bacteria p__Actinobacteria c__Coriobacteriia | 0.02116  | 0.02805  | 0.00174  | 0.03258  | 0.00294  | 0.02605  |
| k__Bacteria p__Actinobacteria c__Coriobacteriia | 0        | 0        | 0        | 0        | 0        | 0        |
| k__Bacteria p__Actinobacteria c__Coriobacteriia | 0        | 0        | 0        | 0        | 0        | 0        |
| k__Bacteria p__Actinobacteria c__Coriobacteriia | 0.00242  | 0.00354  | 0.00054  | 0.00242  | 0        | 0.00339  |
| k__Bacteria p__Actinobacteria c__Coriobacteriia | 0.00242  | 0.00354  | 0.00054  | 0.00242  | 0        | 0.00339  |
| k__Bacteria p__Actinobacteria c__Coriobacteriia | 0        | 0        | 0        | 0        | 0        | 0        |
| k__Bacteria p__Actinobacteria c__Coriobacteriia | 0        | 0        | 0        | 0        | 0        | 0        |
| k__Bacteria p__Bacteroidetes                    | 69.06482 | 71.12769 | 62.43203 | 84.3306  | 92.42681 | 78.47789 |
| k__Bacteria p__Bacteroidetes c__Bacteroidetes   | 0        | 0        | 0        | 0        | 0        | 0        |
| k__Bacteria p__Bacteroidetes c__Bacteroidetes   | 0        | 0        | 0        | 0        | 0        | 0        |
| k__Bacteria p__Bacteroidetes c__Bacteroidetes   | 0        | 0        | 0        | 0        | 0        | 0        |
| k__Bacteria p__Bacteroidetes c__Bacteroidetes   | 0        | 0        | 0        | 0        | 0        | 0        |
| k__Bacteria p__Bacteroidetes c__Bacteroidetes   | 0        | 0        | 0        | 0        | 0        | 0        |
| k__Bacteria p__Bacteroidetes c__Bacteroidia     | 69.06482 | 71.12502 | 62.43203 | 84.3306  | 92.42681 | 78.47789 |
| k__Bacteria p__Bacteroidetes c__Bacteroidia o__ | 69.06482 | 71.12502 | 62.43203 | 84.3306  | 92.42681 | 78.47789 |
| k__Bacteria p__Bacteroidetes c__Bacteroidia o__ | 65.52159 | 62.53354 | 52.40902 | 68.41289 | 91.58155 | 73.22866 |

|                                                 |          |          |          |          |          |          |
|-------------------------------------------------|----------|----------|----------|----------|----------|----------|
| k__Bacteria p__Bacteroidetes c__Bacteroidia o__ | 65.52159 | 62.53354 | 52.40902 | 68.41289 | 91.58155 | 73.22866 |
| k__Bacteria p__Bacteroidetes c__Bacteroidia o__ | 0        | 0        | 0        | 4.76631  | 0.00067  | 3.52483  |
| k__Bacteria p__Bacteroidetes c__Bacteroidia o__ | 0.07055  | 0.06637  | 0.84079  | 0        | 0        | 0        |
| k__Bacteria p__Bacteroidetes c__Bacteroidia o__ | 0        | 0        | 0        | 0        | 0        | 0        |
| k__Bacteria p__Bacteroidetes c__Bacteroidia o__ | 0        | 0        | 0.00013  | 10.95925 | 4.69375  | 5.34075  |
| k__Bacteria p__Bacteroidetes c__Bacteroidia o__ | 0        | 0        | 0        | 0        | 0        | 0        |
| k__Bacteria p__Bacteroidetes c__Bacteroidia o__ | 0        | 0        | 0        | 0        | 0        | 0        |
| k__Bacteria p__Bacteroidetes c__Bacteroidia o__ | 0        | 0        | 0        | 0        | 0        | 0        |
| k__Bacteria p__Bacteroidetes c__Bacteroidia o__ | 0        | 0        | 0        | 0        | 0        | 0        |
| k__Bacteria p__Bacteroidetes c__Bacteroidia o__ | 2.57876  | 11.7188  | 1.36661  | 3.19685  | 17.11976 | 2.34669  |
| k__Bacteria p__Bacteroidetes c__Bacteroidia o__ | 1.25308  | 1.55895  | 6.84114  | 0        | 0        | 0        |
| k__Bacteria p__Bacteroidetes c__Bacteroidia o__ | 0.03647  | 0.10933  | 0.09733  | 0        | 0        | 0        |
| k__Bacteria p__Bacteroidetes c__Bacteroidia o__ | 0.00054  | 0.00227  | 0.0022   | 0        | 0        | 0        |
| k__Bacteria p__Bacteroidetes c__Bacteroidia o__ | 0.61042  | 0.43879  | 0.697    | 0        | 0.00285  | 0.01304  |
| k__Bacteria p__Bacteroidetes c__Bacteroidia o__ | 0        | 0        | 0        | 0        | 0        | 0.00139  |
| k__Bacteria p__Bacteroidetes c__Bacteroidia o__ | 0        | 0        | 0        | 1.30528  | 1.74245  | 2.36337  |
| k__Bacteria p__Bacteroidetes c__Bacteroidia o__ | 0.00695  | 0.00452  | 0.00657  | 0        | 0        | 0        |
| k__Bacteria p__Bacteroidetes c__Bacteroidia o__ | 0        | 0        | 0        | 0        | 0        | 0        |
| k__Bacteria p__Bacteroidetes c__Bacteroidia o__ | 0        | 0        | 0        | 8.81947  | 54.89933 | 27.03738 |
| k__Bacteria p__Bacteroidetes c__Bacteroidia o__ | 1.2834   | 1.6254   | 3.62751  | 7.02992  | 2.81265  | 1.6856   |
| k__Bacteria p__Bacteroidetes c__Bacteroidia o__ | 20.83861 | 11.98095 | 5.97262  | 0.36424  | 9.01714  | 20.76674 |
| k__Bacteria p__Bacteroidetes c__Bacteroidia o__ | 31.09047 | 31.67915 | 20.96144 | 31.23713 | 1.16303  | 8.50519  |
| k__Bacteria p__Bacteroidetes c__Bacteroidia o__ | 7.75234  | 3.34901  | 11.99567 | 0.73445  | 0.12992  | 1.64368  |
| k__Bacteria p__Bacteroidetes c__Bacteroidia o__ | 0        | 0        | 0        | 0        | 0        | 0        |
| k__Bacteria p__Bacteroidetes c__Bacteroidia o__ | 0        | 0        | 0        | 0        | 0        | 0        |
| k__Bacteria p__Bacteroidetes c__Bacteroidia o__ | 0        | 0        | 0        | 0        | 0        | 0        |
| k__Bacteria p__Bacteroidetes c__Bacteroidia o__ | 0        | 0        | 0        | 0        | 0        | 0        |
| k__Bacteria p__Bacteroidetes c__Bacteroidia o__ | 0        | 0        | 0        | 0        | 0        | 0        |
| k__Bacteria p__Bacteroidetes c__Bacteroidia o__ | 0        | 0        | 0        | 0        | 0        | 0        |
| k__Bacteria p__Bacteroidetes c__Bacteroidia o__ | 1.08608  | 3.74507  | 1.37593  | 0.76686  | 0        | 0.1942   |
| k__Bacteria p__Bacteroidetes c__Bacteroidia o__ | 1.08107  | 3.67735  | 1.3672   | 0.76686  | 0        | 0.1942   |
| k__Bacteria p__Bacteroidetes c__Bacteroidia o__ | 0.00069  | 0.00448  | 0.00234  | 0        | 0        | 0        |
| k__Bacteria p__Bacteroidetes c__Bacteroidia o__ | 1.08039  | 3.67288  | 1.36486  | 0.76686  | 0        | 0.1942   |
| k__Bacteria p__Bacteroidetes c__Bacteroidia o__ | 0.005    | 0.06771  | 0.00873  | 0        | 0        | 0        |
| k__Bacteria p__Bacteroidetes c__Bacteroidia o__ | 0.005    | 0.06771  | 0.00873  | 0        | 0        | 0        |

|                                                 |         |         |         |         |         |         |
|-------------------------------------------------|---------|---------|---------|---------|---------|---------|
| k__Bacteria p__Bacteroidetes c__Bacteroidia o__ | 0       | 0       | 0       | 0       | 0       | 0       |
| k__Bacteria p__Bacteroidetes c__Bacteroidia o__ | 0       | 0.07594 | 0       | 0       | 0       | 0       |
| k__Bacteria p__Bacteroidetes c__Bacteroidia o__ | 0       | 0.07594 | 0       | 0       | 0       | 0       |
| k__Bacteria p__Bacteroidetes c__Bacteroidia o__ | 0       | 0.03723 | 0       | 0       | 0       | 0       |
| k__Bacteria p__Bacteroidetes c__Bacteroidia o__ | 0       | 0.03871 | 0       | 0       | 0       | 0       |
| k__Bacteria p__Bacteroidetes c__Bacteroidia o__ | 0       | 0       | 0       | 0       | 0       | 0       |
| k__Bacteria p__Bacteroidetes c__Bacteroidia o__ | 0       | 0       | 0       | 0       | 0       | 0       |
| k__Bacteria p__Bacteroidetes c__Bacteroidia o__ | 0       | 0       | 0       | 0       | 0       | 0       |
| k__Bacteria p__Bacteroidetes c__Bacteroidia o__ | 1.32989 | 1.13637 | 7.27821 | 0.02157 | 0       | 0.00058 |
| k__Bacteria p__Bacteroidetes c__Bacteroidia o__ | 0       | 0.01243 | 0       | 0       | 0       | 0       |
| k__Bacteria p__Bacteroidetes c__Bacteroidia o__ | 0       | 0.01243 | 0       | 0       | 0       | 0       |
| k__Bacteria p__Bacteroidetes c__Bacteroidia o__ | 0       | 0       | 0       | 0       | 0       | 0       |
| k__Bacteria p__Bacteroidetes c__Bacteroidia o__ | 0       | 0       | 0       | 0       | 0       | 0       |
| k__Bacteria p__Bacteroidetes c__Bacteroidia o__ | 0       | 0       | 0       | 0       | 0       | 0       |
| k__Bacteria p__Bacteroidetes c__Bacteroidia o__ | 1.32989 | 1.12394 | 7.27821 | 0.02157 | 0       | 0.00058 |
| k__Bacteria p__Bacteroidetes c__Bacteroidia o__ | 0       | 0.00321 | 0       | 0.02157 | 0       | 0.00058 |
| k__Bacteria p__Bacteroidetes c__Bacteroidia o__ | 0       | 0       | 0       | 0       | 0       | 0       |
| k__Bacteria p__Bacteroidetes c__Bacteroidia o__ | 0       | 0       | 0       | 0       | 0       | 0       |
| k__Bacteria p__Bacteroidetes c__Bacteroidia o__ | 0       | 0       | 0       | 0       | 0       | 0       |
| k__Bacteria p__Bacteroidetes c__Bacteroidia o__ | 0       | 0.00688 | 0       | 0       | 0       | 0       |
| k__Bacteria p__Bacteroidetes c__Bacteroidia o__ | 0       | 0       | 0       | 0       | 0       | 0       |
| k__Bacteria p__Bacteroidetes c__Bacteroidia o__ | 0       | 0.01595 | 0       | 0       | 0       | 0       |
| k__Bacteria p__Bacteroidetes c__Bacteroidia o__ | 0       | 0.00065 | 0       | 0       | 0       | 0       |
| k__Bacteria p__Bacteroidetes c__Bacteroidia o__ | 0.00822 | 0       | 0       | 0       | 0       | 0       |
| k__Bacteria p__Bacteroidetes c__Bacteroidia o__ | 0       | 0.00128 | 0       | 0       | 0       | 0       |
| k__Bacteria p__Bacteroidetes c__Bacteroidia o__ | 0       | 0.06206 | 0       | 0       | 0       | 0       |
| k__Bacteria p__Bacteroidetes c__Bacteroidia o__ | 0       | 0.00247 | 0       | 0       | 0       | 0       |
| k__Bacteria p__Bacteroidetes c__Bacteroidia o__ | 0       | 0.00065 | 0       | 0       | 0       | 0       |
| k__Bacteria p__Bacteroidetes c__Bacteroidia o__ | 1.32167 | 1.03078 | 7.27821 | 0       | 0       | 0       |
| k__Bacteria p__Bacteroidetes c__Bacteroidia o__ | 0       | 0       | 0       | 0       | 0       | 0       |
| k__Bacteria p__Bacteroidetes c__Bacteroidia o__ | 0       | 0       | 0       | 0       | 0       | 0       |
| k__Bacteria p__Bacteroidetes c__Bacteroidia o__ | 0       | 0       | 0       | 0       | 0       | 0       |
| k__Bacteria p__Bacteroidetes c__Bacteroidia o__ | 0.36988 | 0.66871 | 0.3632  | 2.50586 | 0.08461 | 1.47227 |
| k__Bacteria p__Bacteroidetes c__Bacteroidia o__ | 0.36988 | 0.66871 | 0.3632  | 2.50586 | 0.08461 | 1.47227 |

|                                                 |          |          |          |          |         |          |
|-------------------------------------------------|----------|----------|----------|----------|---------|----------|
| k__Bacteria p__Bacteroidetes c__Bacteroidia o__ | 0        | 0        | 0        | 2.42028  | 0.08299 | 1.45829  |
| k__Bacteria p__Bacteroidetes c__Bacteroidia o__ | 0.04285  | 0.12586  | 0.03336  | 0.01407  | 0       | 0        |
| k__Bacteria p__Bacteroidetes c__Bacteroidia o__ | 0        | 0        | 0        | 0        | 0       | 0        |
| k__Bacteria p__Bacteroidetes c__Bacteroidia o__ | 0        | 0        | 0        | 0        | 0       | 0        |
| k__Bacteria p__Bacteroidetes c__Bacteroidia o__ | 0.32703  | 0.54284  | 0.32985  | 0.07151  | 0.00162 | 0.01398  |
| k__Bacteria p__Bacteroidetes c__Bacteroidia o__ | 0        | 0        | 0        | 0        | 0       | 0        |
| k__Bacteria p__Bacteroidetes c__Bacteroidia o__ | 0.75739  | 2.9654   | 1.00567  | 12.62342 | 0.76065 | 3.58219  |
| k__Bacteria p__Bacteroidetes c__Bacteroidia o__ | 0.75739  | 2.9654   | 1.00567  | 12.62342 | 0.76065 | 3.58219  |
| k__Bacteria p__Bacteroidetes c__Bacteroidia o__ | 0.65855  | 1.50481  | 0.81444  | 6.66688  | 0.36844 | 2.44804  |
| k__Bacteria p__Bacteroidetes c__Bacteroidia o__ | 0.08092  | 1.40067  | 0.16842  | 1.27208  | 0.00088 | 0.32617  |
| k__Bacteria p__Bacteroidetes c__Bacteroidia o__ | 0.01306  | 0.04702  | 0.01554  | 0        | 0       | 0        |
| k__Bacteria p__Bacteroidetes c__Bacteroidia o__ | 0.00458  | 0.0129   | 0.00727  | 0.13575  | 0       | 0.22213  |
| k__Bacteria p__Bacteroidetes c__Bacteroidia o__ | 0.00027  | 0        | 0        | 4.54871  | 0.39133 | 0.58585  |
| k__Bacteria p__Bacteroidetes c__Bacteroidia o__ | 0        | 0        | 0        | 0        | 0       | 0        |
| k__Bacteria p__Bacteroidetes c__Flavobacteriia  | 0        | 0.00267  | 0        | 0        | 0       | 0        |
| k__Bacteria p__Bacteroidetes c__Flavobacteriia  | 0        | 0.00267  | 0        | 0        | 0       | 0        |
| k__Bacteria p__Bacteroidetes c__Flavobacteriia  | 0        | 0.00267  | 0        | 0        | 0       | 0        |
| k__Bacteria p__Bacteroidetes c__Flavobacteriia  | 0        | 0.00267  | 0        | 0        | 0       | 0        |
| k__Bacteria p__Bacteroidetes c__Flavobacteriia  | 0        | 0.00057  | 0        | 0        | 0       | 0        |
| k__Bacteria p__Bacteroidetes c__Flavobacteriia  | 0        | 0.0021   | 0        | 0        | 0       | 0        |
| k__Bacteria p__Firmicutes                       | 26.49054 | 21.11724 | 30.98224 | 5.74117  | 2.0467  | 12.12343 |
| k__Bacteria p__Firmicutes c__Bacilli            | 0.0304   | 2.58949  | 0.60771  | 0.1929   | 0.45135 | 0.59093  |
| k__Bacteria p__Firmicutes c__Bacilli o__Bacilla | 0.00051  | 0.38802  | 0.00404  | 0.00346  | 0       | 0.00662  |
| k__Bacteria p__Firmicutes c__Bacilli o__Bacilla | 0.00051  | 0.38802  | 0.00404  | 0.00346  | 0       | 0.00662  |
| k__Bacteria p__Firmicutes c__Bacilli o__Bacilla | 0.00051  | 0.38802  | 0.00404  | 0.00346  | 0       | 0.00662  |
| k__Bacteria p__Firmicutes c__Bacilli o__Bacilla | 0        | 0        | 0        | 0        | 0       | 0        |
| k__Bacteria p__Firmicutes c__Bacilli o__Bacilla | 0        | 0.05097  | 0.00093  | 0.00227  | 0       | 0        |
| k__Bacteria p__Firmicutes c__Bacilli o__Bacilla | 0        | 0.28677  | 0.00024  | 0        | 0       | 0.00133  |
| k__Bacteria p__Firmicutes c__Bacilli o__Bacilla | 0.00051  | 0.05028  | 0.00287  | 0.00119  | 0       | 0.00528  |
| k__Bacteria p__Firmicutes c__Bacilli o__Lactob  | 0.02989  | 2.20147  | 0.60368  | 0.18944  | 0.45135 | 0.58431  |
| k__Bacteria p__Firmicutes c__Bacilli o__Lactob  | 0.00036  | 0.02516  | 0.00132  | 0        | 0       | 0        |
| k__Bacteria p__Firmicutes c__Bacilli o__Lactob  | 0.00036  | 0.02516  | 0.00132  | 0        | 0       | 0        |
| k__Bacteria p__Firmicutes c__Bacilli o__Lactob  | 0        | 0.01291  | 0        | 0        | 0       | 0        |
| k__Bacteria p__Firmicutes c__Bacilli o__Lactob  | 0.00036  | 0.01225  | 0.00132  | 0        | 0       | 0        |
| k__Bacteria p__Firmicutes c__Bacilli o__Lactob  | 0        | 0.32419  | 0        | 0        | 0.00023 | 0        |

|                                                |         |         |         |         |         |         |
|------------------------------------------------|---------|---------|---------|---------|---------|---------|
| k__Bacteria p__Firmicutes c__Bacilli o__Lactob | 0       | 0.32419 | 0       | 0       | 0.00023 | 0       |
| k__Bacteria p__Firmicutes c__Bacilli o__Lactob | 0       | 0.00841 | 0       | 0       | 0.00023 | 0       |
| k__Bacteria p__Firmicutes c__Bacilli o__Lactob | 0       | 0.31578 | 0       | 0       | 0       | 0       |
| k__Bacteria p__Firmicutes c__Bacilli o__Lactob | 0       | 0       | 0       | 0.00432 | 0.20625 | 0       |
| k__Bacteria p__Firmicutes c__Bacilli o__Lactob | 0       | 0       | 0       | 0.00432 | 0.20625 | 0       |
| k__Bacteria p__Firmicutes c__Bacilli o__Lactob | 0       | 0       | 0       | 0       | 0       | 0       |
| k__Bacteria p__Firmicutes c__Bacilli o__Lactob | 0       | 0       | 0       | 0.00112 | 0.00038 | 0       |
| k__Bacteria p__Firmicutes c__Bacilli o__Lactob | 0       | 0       | 0       | 0       | 0       | 0       |
| k__Bacteria p__Firmicutes c__Bacilli o__Lactob | 0       | 0       | 0       | 0       | 0       | 0       |
| k__Bacteria p__Firmicutes c__Bacilli o__Lactob | 0       | 0       | 0       | 0       | 0.20586 | 0       |
| k__Bacteria p__Firmicutes c__Bacilli o__Lactob | 0       | 0       | 0       | 0.00321 | 0       | 0       |
| k__Bacteria p__Firmicutes c__Bacilli o__Lactob | 0       | 0       | 0       | 0       | 0       | 0       |
| k__Bacteria p__Firmicutes c__Bacilli o__Lactob | 0       | 0       | 0       | 0       | 0       | 0       |
| k__Bacteria p__Firmicutes c__Bacilli o__Lactob | 0       | 0       | 0       | 0       | 0       | 0       |
| k__Bacteria p__Firmicutes c__Bacilli o__Lactob | 0       | 0       | 0       | 0.00708 | 0       | 0       |
| k__Bacteria p__Firmicutes c__Bacilli o__Lactob | 0       | 0       | 0       | 0.00708 | 0       | 0       |
| k__Bacteria p__Firmicutes c__Bacilli o__Lactob | 0       | 0       | 0       | 0       | 0       | 0       |
| k__Bacteria p__Firmicutes c__Bacilli o__Lactob | 0       | 0       | 0       | 0       | 0       | 0       |
| k__Bacteria p__Firmicutes c__Bacilli o__Lactob | 0       | 0       | 0       | 0       | 0       | 0       |
| k__Bacteria p__Firmicutes c__Bacilli o__Lactob | 0       | 0       | 0       | 0       | 0       | 0       |
| k__Bacteria p__Firmicutes c__Bacilli o__Lactob | 0       | 0       | 0       | 0       | 0       | 0       |
| k__Bacteria p__Firmicutes c__Bacilli o__Lactob | 0       | 0       | 0       | 0       | 0       | 0       |
| k__Bacteria p__Firmicutes c__Bacilli o__Lactob | 0       | 0       | 0       | 0       | 0       | 0       |
| k__Bacteria p__Firmicutes c__Bacilli o__Lactob | 0       | 0       | 0       | 0       | 0       | 0       |
| k__Bacteria p__Firmicutes c__Bacilli o__Lactob | 0       | 0       | 0       | 0       | 0       | 0       |
| k__Bacteria p__Firmicutes c__Bacilli o__Lactob | 0       | 0       | 0       | 0       | 0       | 0       |
| k__Bacteria p__Firmicutes c__Bacilli o__Lactob | 0       | 0       | 0       | 0       | 0       | 0       |
| k__Bacteria p__Firmicutes c__Bacilli o__Lactob | 0       | 0       | 0.01652 | 0       | 0       | 0       |
| k__Bacteria p__Firmicutes c__Bacilli o__Lactob | 0       | 0       | 0       | 0       | 0       | 0       |
| k__Bacteria p__Firmicutes c__Bacilli o__Lactob | 0       | 0       | 0       | 0       | 0       | 0       |
| k__Bacteria p__Firmicutes c__Bacilli o__Lactob | 0       | 0       | 0       | 0       | 0       | 0       |
| k__Bacteria p__Firmicutes c__Bacilli o__Lactob | 0       | 0       | 0.01652 | 0       | 0       | 0       |
| k__Bacteria p__Firmicutes c__Bacilli o__Lactob | 0       | 0       | 0.00133 | 0       | 0       | 0       |
| k__Bacteria p__Firmicutes c__Bacilli o__Lactob | 0       | 0       | 0.01519 | 0       | 0       | 0       |
| k__Bacteria p__Firmicutes c__Bacilli o__Lactob | 0       | 0       | 0       | 0       | 0       | 0       |
| k__Bacteria p__Firmicutes c__Bacilli o__Lactob | 0.02954 | 1.85212 | 0.58584 | 0.17804 | 0.24487 | 0.58431 |



|                                                |          |          |          |         |         |         |
|------------------------------------------------|----------|----------|----------|---------|---------|---------|
| k__Bacteria p__Firmicutes c__Bacilli o__Lactob | 0.02954  | 1.85212  | 0.58584  | 0.17804 | 0.24487 | 0.58431 |
| k__Bacteria p__Firmicutes c__Bacilli o__Lactob | 0        | 0.02617  | 0.03664  | 0.00296 | 0.00044 | 0.00752 |
| k__Bacteria p__Firmicutes c__Bacilli o__Lactob | 0        | 0.01798  | 0.05161  | 0       | 0.01251 | 0.02554 |
| k__Bacteria p__Firmicutes c__Bacilli o__Lactob | 0        | 0.00043  | 0.00134  | 0.00151 | 0.00117 | 0.037   |
| k__Bacteria p__Firmicutes c__Bacilli o__Lactob | 0        | 0        | 0        | 0       | 0       | 0       |
| k__Bacteria p__Firmicutes c__Bacilli o__Lactob | 0        | 0.03468  | 0.05066  | 0.01335 | 0       | 0.01972 |
| k__Bacteria p__Firmicutes c__Bacilli o__Lactob | 0.00057  | 0.07498  | 0.01847  | 0.00176 | 0.03136 | 0.02643 |
| k__Bacteria p__Firmicutes c__Bacilli o__Lactob | 0        | 0        | 0.06337  | 0       | 0       | 0       |
| k__Bacteria p__Firmicutes c__Bacilli o__Lactob | 0        | 0        | 0        | 0       | 0.0006  | 0       |
| k__Bacteria p__Firmicutes c__Bacilli o__Lactob | 0.00777  | 0.19259  | 0.0171   | 0.03996 | 0       | 0.01502 |
| k__Bacteria p__Firmicutes c__Bacilli o__Lactob | 0        | 0        | 0        | 0       | 0       | 0       |
| k__Bacteria p__Firmicutes c__Bacilli o__Lactob | 0        | 0.10008  | 0.01892  | 0.02507 | 0.06875 | 0.03561 |
| k__Bacteria p__Firmicutes c__Bacilli o__Lactob | 0.00593  | 1.18467  | 0.16111  | 0.03545 | 0.12821 | 0.30228 |
| k__Bacteria p__Firmicutes c__Bacilli o__Lactob | 0        | 0        | 0        | 0       | 0       | 0       |
| k__Bacteria p__Firmicutes c__Bacilli o__Lactob | 0        | 0        | 0        | 0       | 0.00045 | 0.0012  |
| k__Bacteria p__Firmicutes c__Bacilli o__Lactob | 0.01499  | 0.17323  | 0.15471  | 0.05797 | 0       | 0.114   |
| k__Bacteria p__Firmicutes c__Bacilli o__Lactob | 0        | 0.00244  | 0.00487  | 0       | 0       | 0       |
| k__Bacteria p__Firmicutes c__Bacilli o__Lactob | 0        | 0        | 0        | 0       | 0       | 0       |
| k__Bacteria p__Firmicutes c__Bacilli o__Lactob | 0.00027  | 0.00127  | 0.00055  | 0       | 0.00138 | 0       |
| k__Bacteria p__Firmicutes c__Bacilli o__Lactob | 0        | 0.00036  | 0        | 0       | 0       | 0       |
| k__Bacteria p__Firmicutes c__Bacilli o__Lactob | 0        | 0.00224  | 0        | 0       | 0       | 0       |
| k__Bacteria p__Firmicutes c__Bacilli o__Lactob | 0        | 0.00227  | 0        | 0       | 0       | 0       |
| k__Bacteria p__Firmicutes c__Bacilli o__Lactob | 0        | 0.0013   | 0        | 0       | 0       | 0       |
| k__Bacteria p__Firmicutes c__Bacilli o__Lactob | 0        | 0        | 0        | 0       | 0       | 0       |
| k__Bacteria p__Firmicutes c__Bacilli o__Lactob | 0        | 0        | 0        | 0       | 0       | 0       |
| k__Bacteria p__Firmicutes c__Bacilli o__Lactob | 0        | 0.03743  | 0        | 0       | 0       | 0       |
| k__Bacteria p__Firmicutes c__Bacilli o__Lactob | 0        | 0        | 0        | 0       | 0       | 0       |
| k__Bacteria p__Firmicutes c__Bacilli o__Lactob | 0        | 0        | 0.00649  | 0       | 0       | 0       |
| k__Bacteria p__Firmicutes c__Bacilli o__Lactob | 0        | 0        | 0        | 0       | 0       | 0       |
| k__Bacteria p__Firmicutes c__Clostridia        | 22.73505 | 14.56305 | 28.29254 | 4.99099 | 1.09365 | 6.63884 |
| k__Bacteria p__Firmicutes c__Clostridia o__Clo | 22.73505 | 14.56305 | 28.29254 | 4.99099 | 1.09365 | 6.63884 |
| k__Bacteria p__Firmicutes c__Clostridia o__Clo | 0.00385  | 0.01887  | 0.00574  | 0.0013  | 0       | 0       |
| k__Bacteria p__Firmicutes c__Clostridia o__Clo | 0.00385  | 0.01887  | 0.00574  | 0.0013  | 0       | 0       |
| k__Bacteria p__Firmicutes c__Clostridia o__Clo | 0.00385  | 0.01887  | 0.00574  | 0.0013  | 0       | 0       |
| k__Bacteria p__Firmicutes c__Clostridia o__Clo | 0.00033  | 0.00226  | 0.00297  | 0.00476 | 0       | 0       |

|                                                |         |         |         |         |         |         |
|------------------------------------------------|---------|---------|---------|---------|---------|---------|
| k__Bacteria p__Firmicutes c__Clostridia o__Clo | 0.00033 | 0.00226 | 0.00297 | 0.00476 | 0       | 0       |
| k__Bacteria p__Firmicutes c__Clostridia o__Clo | 0.00033 | 0.00226 | 0.00297 | 0.00476 | 0       | 0       |
| k__Bacteria p__Firmicutes c__Clostridia o__Clo | 0.04018 | 1.57171 | 0.01974 | 0.20414 | 0.20112 | 0.10401 |
| k__Bacteria p__Firmicutes c__Clostridia o__Clo | 0       | 0       | 0       | 0       | 0       | 0       |
| k__Bacteria p__Firmicutes c__Clostridia o__Clo | 0       | 0       | 0       | 0       | 0       | 0       |
| k__Bacteria p__Firmicutes c__Clostridia o__Clo | 0.02575 | 0       | 0       | 0.09771 | 0.0495  | 0.05059 |
| k__Bacteria p__Firmicutes c__Clostridia o__Clo | 0       | 0       | 0       | 0       | 0       | 0       |
| k__Bacteria p__Firmicutes c__Clostridia o__Clo | 0.02575 | 0       | 0       | 0.09322 | 0.0495  | 0       |
| k__Bacteria p__Firmicutes c__Clostridia o__Clo | 0       | 0       | 0       | 0       | 0       | 0       |
| k__Bacteria p__Firmicutes c__Clostridia o__Clo | 0       | 0       | 0       | 0       | 0       | 0       |
| k__Bacteria p__Firmicutes c__Clostridia o__Clo | 0       | 0       | 0       | 0       | 0       | 0       |
| k__Bacteria p__Firmicutes c__Clostridia o__Clo | 0       | 0       | 0       | 0       | 0       | 0       |
| k__Bacteria p__Firmicutes c__Clostridia o__Clo | 0       | 0       | 0       | 0       | 0       | 0       |
| k__Bacteria p__Firmicutes c__Clostridia o__Clo | 0       | 0       | 0       | 0.00449 | 0       | 0       |
| k__Bacteria p__Firmicutes c__Clostridia o__Clo | 0       | 0       | 0       | 0       | 0       | 0       |
| k__Bacteria p__Firmicutes c__Clostridia o__Clo | 0       | 0       | 0       | 0       | 0       | 0       |
| k__Bacteria p__Firmicutes c__Clostridia o__Clo | 0       | 0       | 0       | 0       | 0       | 0       |
| k__Bacteria p__Firmicutes c__Clostridia o__Clo | 0       | 0       | 0       | 0       | 0       | 0       |
| k__Bacteria p__Firmicutes c__Clostridia o__Clo | 0       | 0       | 0       | 0       | 0       | 0.00268 |
| k__Bacteria p__Firmicutes c__Clostridia o__Clo | 0       | 0       | 0       | 0       | 0       | 0.04791 |
| k__Bacteria p__Firmicutes c__Clostridia o__Clo | 0.01443 | 1.57171 | 0.01974 | 0.10643 | 0.15162 | 0.05342 |
| k__Bacteria p__Firmicutes c__Clostridia o__Clo | 0       | 0       | 0       | 0       | 0       | 0       |
| k__Bacteria p__Firmicutes c__Clostridia o__Clo | 0.01443 | 1.57171 | 0.01974 | 0.10643 | 0.15162 | 0.05342 |
| k__Bacteria p__Firmicutes c__Clostridia o__Clo | 0       | 0       | 0       | 0       | 0       | 0       |
| k__Bacteria p__Firmicutes c__Clostridia o__Clo | 0       | 0       | 0       | 0       | 0       | 0       |
| k__Bacteria p__Firmicutes c__Clostridia o__Clo | 0       | 0.00786 | 0.00122 | 0       | 0       | 0.00044 |
| k__Bacteria p__Firmicutes c__Clostridia o__Clo | 0       | 0.00281 | 0       | 0       | 0       | 0       |
| k__Bacteria p__Firmicutes c__Clostridia o__Clo | 0       | 0       | 0       | 0       | 0       | 0       |
| k__Bacteria p__Firmicutes c__Clostridia o__Clo | 0       | 0.00019 | 0       | 0       | 0       | 0       |
| k__Bacteria p__Firmicutes c__Clostridia o__Clo | 0       | 0       | 0       | 0       | 0       | 0       |
| k__Bacteria p__Firmicutes c__Clostridia o__Clo | 0       | 0.00262 | 0       | 0       | 0       | 0       |
| k__Bacteria p__Firmicutes c__Clostridia o__Clo | 0       | 0.00505 | 0.00122 | 0       | 0       | 0.00044 |
| k__Bacteria p__Firmicutes c__Clostridia o__Clo | 0       | 0.00505 | 0.00122 | 0       | 0       | 0.00044 |
| k__Bacteria p__Firmicutes c__Clostridia o__Clo | 0.1096  | 0.08018 | 0.19816 | 0       | 0       | 0       |

|                                                |         |         |          |         |         |         |
|------------------------------------------------|---------|---------|----------|---------|---------|---------|
| k__Bacteria p__Firmicutes c__Clostridia o__Clo | 0       | 0       | 0        | 0       | 0       | 0       |
| k__Bacteria p__Firmicutes c__Clostridia o__Clo | 0       | 0       | 0        | 0       | 0       | 0       |
| k__Bacteria p__Firmicutes c__Clostridia o__Clo | 0.1096  | 0.08018 | 0.19816  | 0       | 0       | 0       |
| k__Bacteria p__Firmicutes c__Clostridia o__Clo | 0.1096  | 0.08018 | 0.19816  | 0       | 0       | 0       |
| k__Bacteria p__Firmicutes c__Clostridia o__Clo | 0       | 0       | 0        | 0       | 0       | 0       |
| k__Bacteria p__Firmicutes c__Clostridia o__Clo | 0       | 0       | 0        | 0       | 0       | 0       |
| k__Bacteria p__Firmicutes c__Clostridia o__Clo | 0       | 0       | 0        | 0       | 0       | 0       |
| k__Bacteria p__Firmicutes c__Clostridia o__Clo | 0       | 0       | 0        | 0       | 0       | 0       |
| k__Bacteria p__Firmicutes c__Clostridia o__Clo | 8.25376 | 1.7351  | 8.77646  | 0.00957 | 0       | 0.37596 |
| k__Bacteria p__Firmicutes c__Clostridia o__Clo | 0       | 0       | 0        | 0       | 0       | 0       |
| k__Bacteria p__Firmicutes c__Clostridia o__Clo | 0       | 0       | 0        | 0       | 0       | 0       |
| k__Bacteria p__Firmicutes c__Clostridia o__Clo | 0       | 0       | 0        | 0       | 0       | 0       |
| k__Bacteria p__Firmicutes c__Clostridia o__Clo | 0       | 0       | 0        | 0       | 0       | 0       |
| k__Bacteria p__Firmicutes c__Clostridia o__Clo | 8.25376 | 1.7351  | 8.77646  | 0.00957 | 0       | 0.37596 |
| k__Bacteria p__Firmicutes c__Clostridia o__Clo | 0       | 0       | 0        | 0       | 0       | 0       |
| k__Bacteria p__Firmicutes c__Clostridia o__Clo | 0       | 0       | 0        | 0       | 0       | 0       |
| k__Bacteria p__Firmicutes c__Clostridia o__Clo | 4.20063 | 0.60738 | 7.48267  | 0       | 0       | 0       |
| k__Bacteria p__Firmicutes c__Clostridia o__Clo | 0.27303 | 0.16012 | 0.04779  | 0       | 0       | 0.12917 |
| k__Bacteria p__Firmicutes c__Clostridia o__Clo | 0       | 0.00025 | 0        | 0.00957 | 0       | 0       |
| k__Bacteria p__Firmicutes c__Clostridia o__Clo | 0.05605 | 0.27755 | 0.02168  | 0       | 0       | 0       |
| k__Bacteria p__Firmicutes c__Clostridia o__Clo | 0       | 0       | 0        | 0       | 0       | 0       |
| k__Bacteria p__Firmicutes c__Clostridia o__Clo | 0       | 0       | 0        | 0       | 0       | 0       |
| k__Bacteria p__Firmicutes c__Clostridia o__Clo | 0       | 0       | 0        | 0       | 0       | 0       |
| k__Bacteria p__Firmicutes c__Clostridia o__Clo | 3.72405 | 0.6898  | 1.22432  | 0       | 0       | 0.24679 |
| k__Bacteria p__Firmicutes c__Clostridia o__Clo | 0       | 0       | 0        | 0       | 0       | 0       |
| k__Bacteria p__Firmicutes c__Clostridia o__Clo | 0       | 0       | 0        | 0       | 0       | 0       |
| k__Bacteria p__Firmicutes c__Clostridia o__Clo | 0       | 0       | 0        | 0       | 0       | 0       |
| k__Bacteria p__Firmicutes c__Clostridia o__Clo | 7.87242 | 5.17828 | 12.42379 | 3.6052  | 0.45932 | 5.19227 |
| k__Bacteria p__Firmicutes c__Clostridia o__Clo | 0.35876 | 0.62558 | 0.11718  | 0       | 0.01908 | 0.04637 |
| k__Bacteria p__Firmicutes c__Clostridia o__Clo | 0       | 0       | 0        | 0       | 0       | 0       |
| k__Bacteria p__Firmicutes c__Clostridia o__Clo | 0.35876 | 0.62558 | 0.11718  | 0       | 0.01908 | 0.04637 |
| k__Bacteria p__Firmicutes c__Clostridia o__Clo | 0       | 0       | 0        | 0       | 0       | 0       |
| k__Bacteria p__Firmicutes c__Clostridia o__Clo | 0       | 0       | 0        | 0       | 0       | 0       |
| k__Bacteria p__Firmicutes c__Clostridia o__Clo | 0.82335 | 0.48417 | 0.7242   | 2.55968 | 0.28249 | 4.03838 |

|                                                |         |         |         |         |         |         |
|------------------------------------------------|---------|---------|---------|---------|---------|---------|
| k__Bacteria p__Firmicutes c__Clostridia o__Clo | 0       | 0       | 0       | 0       | 0       | 0.00928 |
| k__Bacteria p__Firmicutes c__Clostridia o__Clo | 0       | 0       | 0       | 0       | 0       | 0       |
| k__Bacteria p__Firmicutes c__Clostridia o__Clo | 0       | 0       | 0       | 0       | 0       | 0       |
| k__Bacteria p__Firmicutes c__Clostridia o__Clo | 0.60059 | 0.28876 | 0.19588 | 0       | 0       | 0       |
| k__Bacteria p__Firmicutes c__Clostridia o__Clo | 0       | 0       | 0       | 0       | 0       | 0.00179 |
| k__Bacteria p__Firmicutes c__Clostridia o__Clo | 0       | 0       | 0       | 0       | 0.00317 | 0.02617 |
| k__Bacteria p__Firmicutes c__Clostridia o__Clo | 0.11455 | 0.05872 | 0.50652 | 0       | 0.05651 | 0.57198 |
| k__Bacteria p__Firmicutes c__Clostridia o__Clo | 0.00067 | 0.02561 | 0.00063 | 2.55968 | 0.22281 | 3.42917 |
| k__Bacteria p__Firmicutes c__Clostridia o__Clo | 0.10753 | 0.11108 | 0.02117 | 0       | 0       | 0       |
| k__Bacteria p__Firmicutes c__Clostridia o__Clo | 0       | 0       | 0       | 0       | 0       | 0       |
| k__Bacteria p__Firmicutes c__Clostridia o__Clo | 0       | 0       | 0       | 0       | 0       | 0       |
| k__Bacteria p__Firmicutes c__Clostridia o__Clo | 0       | 0       | 0       | 0       | 0       | 0       |
| k__Bacteria p__Firmicutes c__Clostridia o__Clo | 0       | 0       | 0       | 0       | 0       | 0       |
| k__Bacteria p__Firmicutes c__Clostridia o__Clo | 0       | 0       | 0       | 0       | 0       | 0       |
| k__Bacteria p__Firmicutes c__Clostridia o__Clo | 0.29644 | 0.31587 | 0.1951  | 0.00264 | 0.01312 | 0.06997 |
| k__Bacteria p__Firmicutes c__Clostridia o__Clo | 0.13347 | 0.1633  | 0.07618 | 0.00264 | 0.01312 | 0.06997 |
| k__Bacteria p__Firmicutes c__Clostridia o__Clo | 0.16298 | 0.15257 | 0.11892 | 0       | 0       | 0       |
| k__Bacteria p__Firmicutes c__Clostridia o__Clo | 0       | 0       | 0       | 0       | 0       | 0       |
| k__Bacteria p__Firmicutes c__Clostridia o__Clo | 0.00692 | 0.02428 | 0.0022  | 0.03146 | 0       | 0.03708 |
| k__Bacteria p__Firmicutes c__Clostridia o__Clo | 0.00692 | 0.02428 | 0.0022  | 0       | 0       | 0       |
| k__Bacteria p__Firmicutes c__Clostridia o__Clo | 0       | 0       | 0       | 0.03146 | 0       | 0.03708 |
| k__Bacteria p__Firmicutes c__Clostridia o__Clo | 0       | 0       | 0       | 0       | 0       | 0       |
| k__Bacteria p__Firmicutes c__Clostridia o__Clo | 0       | 0       | 0       | 0       | 0       | 0       |
| k__Bacteria p__Firmicutes c__Clostridia o__Clo | 0.56524 | 0.23254 | 0.78822 | 0       | 0       | 0       |
| k__Bacteria p__Firmicutes c__Clostridia o__Clo | 0.56524 | 0.23254 | 0.78822 | 0       | 0       | 0       |
| k__Bacteria p__Firmicutes c__Clostridia o__Clo | 0       | 0       | 0       | 0       | 0       | 0       |
| k__Bacteria p__Firmicutes c__Clostridia o__Clo | 0       | 0       | 0       | 0       | 0       | 0       |
| k__Bacteria p__Firmicutes c__Clostridia o__Clo | 0.17639 | 0.41612 | 0.13196 | 0.6167  | 0.14151 | 0.5618  |
| k__Bacteria p__Firmicutes c__Clostridia o__Clo | 0.04268 | 0.08901 | 0.01828 | 0.0045  | 0.00202 | 0.02869 |
| k__Bacteria p__Firmicutes c__Clostridia o__Clo | 0       | 0       | 0       | 0.00928 | 0.00915 | 0.10714 |
| k__Bacteria p__Firmicutes c__Clostridia o__Clo | 0.01743 | 0.03759 | 0.00812 | 0.36559 | 0.10936 | 0.09813 |
| k__Bacteria p__Firmicutes c__Clostridia o__Clo | 0.05344 | 0.10535 | 0.0361  | 0.00523 | 0       | 0.12684 |
| k__Bacteria p__Firmicutes c__Clostridia o__Clo | 0.00025 | 0.00136 | 0.00687 | 0       | 0       | 0.03158 |
| k__Bacteria p__Firmicutes c__Clostridia o__Clo | 0       | 0       | 0       | 0       | 0       | 0       |
| k__Bacteria p__Firmicutes c__Clostridia o__Clo | 0.0484  | 0.0646  | 0.02753 | 0       | 0       | 0       |

|                                                |         |         |         |         |         |         |
|------------------------------------------------|---------|---------|---------|---------|---------|---------|
| k__Bacteria p__Firmicutes c__Clostridia o__Clo | 0       | 0       | 0       | 0       | 0       | 0       |
| k__Bacteria p__Firmicutes c__Clostridia o__Clo | 0       | 0       | 0       | 0       | 0       | 0       |
| k__Bacteria p__Firmicutes c__Clostridia o__Clo | 0.01419 | 0.11822 | 0.03506 | 0.2321  | 0.02098 | 0.16943 |
| k__Bacteria p__Firmicutes c__Clostridia o__Clo | 0       | 0       | 0       | 0       | 0       | 0       |
| k__Bacteria p__Firmicutes c__Clostridia o__Clo | 0       | 0       | 0       | 0       | 0       | 0       |
| k__Bacteria p__Firmicutes c__Clostridia o__Clo | 0       | 0       | 0       | 0       | 0       | 0       |
| k__Bacteria p__Firmicutes c__Clostridia o__Clo | 3.26056 | 2.16232 | 6.18004 | 0.02558 | 0       | 0.29348 |
| k__Bacteria p__Firmicutes c__Clostridia o__Clo | 3.26056 | 2.16232 | 6.18004 | 0       | 0       | 0       |
| k__Bacteria p__Firmicutes c__Clostridia o__Clo | 0       | 0       | 0       | 0.02558 | 0       | 0.29348 |
| k__Bacteria p__Firmicutes c__Clostridia o__Clo | 0       | 0       | 0       | 0       | 0       | 0       |
| k__Bacteria p__Firmicutes c__Clostridia o__Clo | 0       | 0       | 0       | 0       | 0       | 0       |
| k__Bacteria p__Firmicutes c__Clostridia o__Clo | 0       | 0.00096 | 0.00333 | 0       | 0       | 0       |
| k__Bacteria p__Firmicutes c__Clostridia o__Clo | 0       | 0.00096 | 0.00333 | 0       | 0       | 0       |
| k__Bacteria p__Firmicutes c__Clostridia o__Clo | 0       | 0.00198 | 0       | 0       | 0       | 0       |
| k__Bacteria p__Firmicutes c__Clostridia o__Clo | 0       | 0.00198 | 0       | 0       | 0       | 0       |
| k__Bacteria p__Firmicutes c__Clostridia o__Clo | 0       | 0.00441 | 0       | 0       | 0       | 0       |
| k__Bacteria p__Firmicutes c__Clostridia o__Clo | 0       | 0.00441 | 0       | 0       | 0       | 0       |
| k__Bacteria p__Firmicutes c__Clostridia o__Clo | 0       | 0       | 0       | 0       | 0       | 0       |
| k__Bacteria p__Firmicutes c__Clostridia o__Clo | 0       | 0       | 0       | 0       | 0       | 0       |
| k__Bacteria p__Firmicutes c__Clostridia o__Clo | 2.38476 | 0.90455 | 4.28155 | 0       | 0       | 0.00438 |
| k__Bacteria p__Firmicutes c__Clostridia o__Clo | 1.94239 | 0.81374 | 0       | 0       | 0       | 0       |
| k__Bacteria p__Firmicutes c__Clostridia o__Clo | 0.37102 | 0.06459 | 1.77762 | 0       | 0       | 0       |
| k__Bacteria p__Firmicutes c__Clostridia o__Clo | 0.01697 | 0.00158 | 0       | 0       | 0       | 0.00415 |
| k__Bacteria p__Firmicutes c__Clostridia o__Clo | 0.03395 | 0.01486 | 2.39218 | 0       | 0       | 0.00022 |
| k__Bacteria p__Firmicutes c__Clostridia o__Clo | 0.02043 | 0.00977 | 0.11175 | 0       | 0       | 0       |
| k__Bacteria p__Firmicutes c__Clostridia o__Clo | 0       | 0       | 0       | 0       | 0       | 0       |
| k__Bacteria p__Firmicutes c__Clostridia o__Clo | 0       | 0.00248 | 0       | 0       | 0       | 0       |
| k__Bacteria p__Firmicutes c__Clostridia o__Clo | 0       | 0.00248 | 0       | 0       | 0       | 0       |
| k__Bacteria p__Firmicutes c__Clostridia o__Clo | 0       | 0.00302 | 0       | 0       | 0       | 0       |
| k__Bacteria p__Firmicutes c__Clostridia o__Clo | 0       | 0.00302 | 0       | 0       | 0       | 0       |
| k__Bacteria p__Firmicutes c__Clostridia o__Clo | 0       | 0       | 0       | 0       | 0       | 0       |
| k__Bacteria p__Firmicutes c__Clostridia o__Clo | 0       | 0       | 0       | 0       | 0       | 0       |
| k__Bacteria p__Firmicutes c__Clostridia o__Clo | 0       | 0       | 0       | 0.36914 | 0.00311 | 0.14082 |
| k__Bacteria p__Firmicutes c__Clostridia o__Clo | 0       | 0       | 0       | 0.36914 | 0.00311 | 0.14082 |

|                                                |         |         |         |         |         |         |
|------------------------------------------------|---------|---------|---------|---------|---------|---------|
| k__Bacteria p__Firmicutes c__Clostridia o__Clo | 0       | 0       | 0       | 0       | 0       | 0       |
| k__Bacteria p__Firmicutes c__Clostridia o__Clo | 0       | 0       | 0       | 0       | 0       | 0       |
| k__Bacteria p__Firmicutes c__Clostridia o__Clo | 0       | 0       | 0       | 0       | 0       | 0       |
| k__Bacteria p__Firmicutes c__Clostridia o__Clo | 0       | 0       | 0       | 0       | 0       | 0       |
| k__Bacteria p__Firmicutes c__Clostridia o__Clo | 0.00565 | 0.20091 | 0.01722 | 0.15703 | 0.17524 | 0.00558 |
| k__Bacteria p__Firmicutes c__Clostridia o__Clo | 0       | 0       | 0       | 0.15703 | 0.17524 | 0       |
| k__Bacteria p__Firmicutes c__Clostridia o__Clo | 0       | 0       | 0       | 0.15703 | 0.17524 | 0       |
| k__Bacteria p__Firmicutes c__Clostridia o__Clo | 0       | 0       | 0       | 0       | 0       | 0       |
| k__Bacteria p__Firmicutes c__Clostridia o__Clo | 0       | 0       | 0       | 0       | 0       | 0       |
| k__Bacteria p__Firmicutes c__Clostridia o__Clo | 0.00553 | 0.03739 | 0.01722 | 0       | 0       | 0.00558 |
| k__Bacteria p__Firmicutes c__Clostridia o__Clo | 0.00553 | 0.03739 | 0.01722 | 0       | 0       | 0.00558 |
| k__Bacteria p__Firmicutes c__Clostridia o__Clo | 0       | 0       | 0       | 0       | 0       | 0       |
| k__Bacteria p__Firmicutes c__Clostridia o__Clo | 0       | 0       | 0       | 0       | 0       | 0       |
| k__Bacteria p__Firmicutes c__Clostridia o__Clo | 0       | 0       | 0       | 0       | 0       | 0       |
| k__Bacteria p__Firmicutes c__Clostridia o__Clo | 0       | 0       | 0       | 0       | 0       | 0       |
| k__Bacteria p__Firmicutes c__Clostridia o__Clo | 0       | 0.16352 | 0       | 0       | 0       | 0       |
| k__Bacteria p__Firmicutes c__Clostridia o__Clo | 0       | 0       | 0       | 0       | 0       | 0       |
| k__Bacteria p__Firmicutes c__Clostridia o__Clo | 0       | 0.16352 | 0       | 0       | 0       | 0       |
| k__Bacteria p__Firmicutes c__Clostridia o__Clo | 0.00012 | 0       | 0       | 0       | 0       | 0       |
| k__Bacteria p__Firmicutes c__Clostridia o__Clo | 0.00012 | 0       | 0       | 0       | 0       | 0       |
| k__Bacteria p__Firmicutes c__Clostridia o__Clo | 0       | 0       | 0       | 0       | 0       | 0       |
| k__Bacteria p__Firmicutes c__Clostridia o__Clo | 0       | 0       | 0       | 0       | 0       | 0       |
| k__Bacteria p__Firmicutes c__Clostridia o__Clo | 6.44926 | 5.76787 | 6.84726 | 1.00899 | 0.25797 | 0.96059 |
| k__Bacteria p__Firmicutes c__Clostridia o__Clo | 0.30831 | 0.05988 | 0.04471 | 0       | 0.14446 | 0.13761 |
| k__Bacteria p__Firmicutes c__Clostridia o__Clo | 0.30831 | 0.05988 | 0.04471 | 0       | 0.14446 | 0.13761 |
| k__Bacteria p__Firmicutes c__Clostridia o__Clo | 0       | 0       | 0       | 0       | 0       | 0       |
| k__Bacteria p__Firmicutes c__Clostridia o__Clo | 0       | 0       | 0       | 0       | 0       | 0       |
| k__Bacteria p__Firmicutes c__Clostridia o__Clo | 0       | 0       | 0       | 0       | 0       | 0       |
| k__Bacteria p__Firmicutes c__Clostridia o__Clo | 0       | 0       | 0       | 0       | 0       | 0       |
| k__Bacteria p__Firmicutes c__Clostridia o__Clo | 0.05811 | 0.32041 | 0.04941 | 0.13367 | 0       | 0.01361 |
| k__Bacteria p__Firmicutes c__Clostridia o__Clo | 0.05811 | 0.32041 | 0.04941 | 0.13367 | 0       | 0.01361 |
| k__Bacteria p__Firmicutes c__Clostridia o__Clo | 4.10309 | 3.48609 | 4.54088 | 0       | 0.00015 | 0.00063 |
| k__Bacteria p__Firmicutes c__Clostridia o__Clo | 4.10309 | 3.48609 | 4.54088 | 0       | 0.00015 | 0.00063 |
| k__Bacteria p__Firmicutes c__Clostridia o__Clo | 1.19444 | 1.2889  | 0.13982 | 0.62395 | 0.10858 | 0.73271 |
| k__Bacteria p__Firmicutes c__Clostridia o__Clo | 1.19444 | 1.2889  | 0.13982 | 0.62395 | 0.10858 | 0.73271 |

|                                                 |         |         |         |         |         |         |
|-------------------------------------------------|---------|---------|---------|---------|---------|---------|
| k__Bacteria p__Firmicutes c__Clostridia o__Clo  | 0       | 0       | 0       | 0       | 0       | 0       |
| k__Bacteria p__Firmicutes c__Clostridia o__Clo  | 0.22015 | 0.06403 | 0.0963  | 0       | 0       | 0       |
| k__Bacteria p__Firmicutes c__Clostridia o__Clo  | 0.22015 | 0.06403 | 0.0963  | 0       | 0       | 0       |
| k__Bacteria p__Firmicutes c__Clostridia o__Clo  | 0       | 0       | 0       | 0       | 0       | 0       |
| k__Bacteria p__Firmicutes c__Clostridia o__Clo  | 0       | 0       | 0       | 0       | 0       | 0       |
| k__Bacteria p__Firmicutes c__Clostridia o__Clo  | 0       | 0       | 0       | 0       | 0       | 0       |
| k__Bacteria p__Firmicutes c__Clostridia o__Clo  | 0       | 0       | 0       | 0       | 0       | 0       |
| k__Bacteria p__Firmicutes c__Clostridia o__Clo  | 0       | 0       | 0       | 0       | 0       | 0       |
| k__Bacteria p__Firmicutes c__Clostridia o__Clo  | 0       | 0       | 0       | 0       | 0       | 0       |
| k__Bacteria p__Firmicutes c__Clostridia o__Clo  | 0       | 0       | 0       | 0       | 0       | 0       |
| k__Bacteria p__Firmicutes c__Clostridia o__Clo  | 0       | 0       | 0       | 0       | 0       | 0       |
| k__Bacteria p__Firmicutes c__Clostridia o__Clo  | 0       | 0       | 0       | 0       | 0       | 0       |
| k__Bacteria p__Firmicutes c__Clostridia o__Clo  | 0       | 0       | 0       | 0       | 0       | 0       |
| k__Bacteria p__Firmicutes c__Clostridia o__Clo  | 0       | 0       | 0       | 0       | 0       | 0       |
| k__Bacteria p__Firmicutes c__Clostridia o__Clo  | 0.41559 | 0.25855 | 1.86267 | 0       | 0       | 0       |
| k__Bacteria p__Firmicutes c__Clostridia o__Clo  | 0.14275 | 0.06379 | 0.49843 | 0       | 0       | 0       |
| k__Bacteria p__Firmicutes c__Clostridia o__Clo  | 0.27283 | 0.19476 | 1.36424 | 0       | 0       | 0       |
| k__Bacteria p__Firmicutes c__Clostridia o__Clo  | 0       | 0       | 0       | 0       | 0       | 0       |
| k__Bacteria p__Firmicutes c__Clostridia o__Clo  | 0       | 0       | 0       | 0       | 0       | 0       |
| k__Bacteria p__Firmicutes c__Clostridia o__Clo  | 0       | 0       | 0       | 0       | 0       | 0       |
| k__Bacteria p__Firmicutes c__Clostridia o__Clo  | 0.14957 | 0.29001 | 0.11348 | 0.25137 | 0.00478 | 0.07603 |
| k__Bacteria p__Firmicutes c__Clostridia o__Clo  | 0.14957 | 0.29001 | 0.11348 | 0.25137 | 0.00478 | 0.07603 |
| k__Bacteria p__Firmicutes c__Erysipelotrichia   | 0.00847 | 0.19442 | 0.00852 | 0.19858 | 0.00768 | 0.07299 |
| k__Bacteria p__Firmicutes c__Erysipelotrichia o | 0.00847 | 0.19442 | 0.00852 | 0.19858 | 0.00768 | 0.07299 |
| k__Bacteria p__Firmicutes c__Erysipelotrichia o | 0.00847 | 0.19442 | 0.00852 | 0.19858 | 0.00768 | 0.07299 |
| k__Bacteria p__Firmicutes c__Erysipelotrichia o | 0       | 0       | 0       | 0       | 0       | 0       |
| k__Bacteria p__Firmicutes c__Erysipelotrichia o | 0       | 0       | 0       | 0       | 0       | 0       |
| k__Bacteria p__Firmicutes c__Erysipelotrichia o | 0       | 0.0149  | 0       | 0       | 0       | 0       |
| k__Bacteria p__Firmicutes c__Erysipelotrichia o | 0       | 0.0149  | 0       | 0       | 0       | 0       |
| k__Bacteria p__Firmicutes c__Erysipelotrichia o | 0       | 0       | 0       | 0       | 0       | 0       |
| k__Bacteria p__Firmicutes c__Erysipelotrichia o | 0       | 0       | 0       | 0       | 0       | 0       |
| k__Bacteria p__Firmicutes c__Erysipelotrichia o | 0       | 0.12064 | 0       | 0.10029 | 0       | 0       |
| k__Bacteria p__Firmicutes c__Erysipelotrichia o | 0       | 0.12064 | 0       | 0.10029 | 0       | 0       |
| k__Bacteria p__Firmicutes c__Erysipelotrichia o | 0       | 0       | 0       | 0       | 0       | 0       |
| k__Bacteria p__Firmicutes c__Erysipelotrichia o | 0       | 0       | 0       | 0       | 0       | 0       |

|                                                 |         |         |         |         |         |         |
|-------------------------------------------------|---------|---------|---------|---------|---------|---------|
| k__Bacteria p__Firmicutes c__Erysipelotrichia o | 0       | 0.00408 | 0       | 0       | 0       | 0       |
| k__Bacteria p__Firmicutes c__Erysipelotrichia o | 0       | 0.00408 | 0       | 0       | 0       | 0       |
| k__Bacteria p__Firmicutes c__Erysipelotrichia o | 0.00847 | 0.01965 | 0.00852 | 0.09109 | 0.00768 | 0.07299 |
| k__Bacteria p__Firmicutes c__Erysipelotrichia o | 0.00418 | 0.01397 | 0.00205 | 0.08782 | 0       | 0       |
| k__Bacteria p__Firmicutes c__Erysipelotrichia o | 0       | 0       | 0       | 0       | 0       | 0       |
| k__Bacteria p__Firmicutes c__Erysipelotrichia o | 0.00429 | 0.00569 | 0.00646 | 0.00327 | 0.00768 | 0.07299 |
| k__Bacteria p__Firmicutes c__Erysipelotrichia o | 0       | 0       | 0       | 0       | 0       | 0       |
| k__Bacteria p__Firmicutes c__Erysipelotrichia o | 0       | 0       | 0       | 0       | 0       | 0       |
| k__Bacteria p__Firmicutes c__Erysipelotrichia o | 0       | 0       | 0       | 0       | 0       | 0       |
| k__Bacteria p__Firmicutes c__Erysipelotrichia o | 0       | 0       | 0       | 0       | 0       | 0       |
| k__Bacteria p__Firmicutes c__Erysipelotrichia o | 0       | 0       | 0       | 0.0072  | 0       | 0       |
| k__Bacteria p__Firmicutes c__Erysipelotrichia o | 0       | 0       | 0       | 0.0072  | 0       | 0       |
| k__Bacteria p__Firmicutes c__Erysipelotrichia o | 0       | 0       | 0       | 0       | 0       | 0       |
| k__Bacteria p__Firmicutes c__Erysipelotrichia o | 0       | 0       | 0       | 0       | 0       | 0       |
| k__Bacteria p__Firmicutes c__Erysipelotrichia o | 0       | 0       | 0       | 0       | 0       | 0       |
| k__Bacteria p__Firmicutes c__Erysipelotrichia o | 0       | 0       | 0       | 0       | 0       | 0       |
| k__Bacteria p__Firmicutes c__Erysipelotrichia o | 0       | 0       | 0       | 0       | 0       | 0       |
| k__Bacteria p__Firmicutes c__Erysipelotrichia o | 0       | 0.03514 | 0       | 0       | 0       | 0       |
| k__Bacteria p__Firmicutes c__Erysipelotrichia o | 0       | 0.03514 | 0       | 0       | 0       | 0       |
| k__Bacteria p__Firmicutes c__Erysipelotrichia o | 0       | 0       | 0       | 0       | 0       | 0       |
| k__Bacteria p__Firmicutes c__Erysipelotrichia o | 0       | 0       | 0       | 0       | 0       | 0       |
| k__Bacteria p__Firmicutes c__Firmicutes_uncla   | 0.20216 | 0.60806 | 0.1288  | 0       | 0       | 0       |
| k__Bacteria p__Firmicutes c__Firmicutes_uncla   | 0.20216 | 0.60806 | 0.1288  | 0       | 0       | 0       |
| k__Bacteria p__Firmicutes c__Firmicutes_uncla   | 0.20216 | 0.60806 | 0.1288  | 0       | 0       | 0       |
| k__Bacteria p__Firmicutes c__Firmicutes_uncla   | 0.20216 | 0.60806 | 0.1288  | 0       | 0       | 0       |
| k__Bacteria p__Firmicutes c__Firmicutes_uncla   | 0       | 0       | 0       | 0       | 0       | 0       |
| k__Bacteria p__Firmicutes c__Firmicutes_uncla   | 0.20189 | 0.60806 | 0.1288  | 0       | 0       | 0       |
| k__Bacteria p__Firmicutes c__Firmicutes_uncla   | 0       | 0       | 0       | 0       | 0       | 0       |
| k__Bacteria p__Firmicutes c__Firmicutes_uncla   | 0       | 0       | 0       | 0       | 0       | 0       |
| k__Bacteria p__Firmicutes c__Firmicutes_uncla   | 0.00026 | 0       | 0       | 0       | 0       | 0       |
| k__Bacteria p__Firmicutes c__Firmicutes_uncla   | 0       | 0       | 0       | 0       | 0       | 0       |
| k__Bacteria p__Firmicutes c__Firmicutes_uncla   | 0       | 0       | 0       | 0       | 0       | 0       |
| k__Bacteria p__Firmicutes c__Firmicutes_uncla   | 0       | 0       | 0       | 0       | 0       | 0       |
| k__Bacteria p__Firmicutes c__Negativicutes      | 3.49481 | 2.87252 | 1.94459 | 0.35836 | 0.49403 | 4.81767 |



|                                                |         |         |         |         |         |         |
|------------------------------------------------|---------|---------|---------|---------|---------|---------|
| k__Bacteria p__Firmicutes c__Negativicutes o__ | 0.29226 | 0.54783 | 1.46748 | 0.31548 | 0.47471 | 0.66947 |
| k__Bacteria p__Firmicutes c__Negativicutes o__ | 0.29226 | 0.54783 | 1.46748 | 0.31548 | 0.47471 | 0.66947 |
| k__Bacteria p__Firmicutes c__Negativicutes o__ | 0       | 0       | 0       | 0       | 0       | 0       |
| k__Bacteria p__Firmicutes c__Negativicutes o__ | 0       | 0       | 0       | 0       | 0       | 0       |
| k__Bacteria p__Firmicutes c__Negativicutes o__ | 0       | 0       | 0       | 0       | 0       | 0       |
| k__Bacteria p__Firmicutes c__Negativicutes o__ | 0.29226 | 0.54783 | 1.46748 | 0.31548 | 0.47471 | 0.66947 |
| k__Bacteria p__Firmicutes c__Negativicutes o__ | 0.29226 | 0.54783 | 1.46748 | 0.31548 | 0.47471 | 0.66947 |
| k__Bacteria p__Firmicutes c__Negativicutes o__ | 0       | 0       | 0       | 0       | 0       | 0       |
| k__Bacteria p__Firmicutes c__Negativicutes o__ | 0       | 0       | 0       | 0       | 0       | 3.4574  |
| k__Bacteria p__Firmicutes c__Negativicutes o__ | 0       | 0       | 0       | 0       | 0       | 3.4574  |
| k__Bacteria p__Firmicutes c__Negativicutes o__ | 0       | 0       | 0       | 0       | 0       | 3.4574  |
| k__Bacteria p__Firmicutes c__Negativicutes o__ | 0       | 0       | 0       | 0       | 0       | 3.14255 |
| k__Bacteria p__Firmicutes c__Negativicutes o__ | 0       | 0       | 0       | 0       | 0       | 0.31486 |
| k__Bacteria p__Firmicutes c__Negativicutes o__ | 0       | 0       | 0       | 0       | 0       | 0       |
| k__Bacteria p__Firmicutes c__Negativicutes o__ | 0       | 0       | 0       | 0       | 0       | 0       |
| k__Bacteria p__Firmicutes c__Negativicutes o__ | 0       | 0       | 0       | 0       | 0       | 0       |
| k__Bacteria p__Firmicutes c__Negativicutes o__ | 0       | 0       | 0       | 0       | 0       | 0       |
| k__Bacteria p__Firmicutes c__Negativicutes o__ | 0       | 0       | 0       | 0       | 0       | 0       |
| k__Bacteria p__Firmicutes c__Negativicutes o__ | 0       | 0       | 0       | 0       | 0       | 0       |
| k__Bacteria p__Firmicutes c__Negativicutes o__ | 0       | 0       | 0       | 0       | 0       | 0       |
| k__Bacteria p__Firmicutes c__Negativicutes o__ | 0       | 0       | 0       | 0       | 0       | 0       |
| k__Bacteria p__Firmicutes c__Negativicutes o__ | 3.20255 | 2.32469 | 0.47711 | 0.04288 | 0.01932 | 0.6908  |
| k__Bacteria p__Firmicutes c__Negativicutes o__ | 3.20255 | 2.32469 | 0.47711 | 0.04288 | 0.01932 | 0.6908  |
| k__Bacteria p__Firmicutes c__Negativicutes o__ | 0.00273 | 0.00173 | 0       | 0       | 0       | 0       |
| k__Bacteria p__Firmicutes c__Negativicutes o__ | 0.00273 | 0.00173 | 0       | 0       | 0       | 0       |
| k__Bacteria p__Firmicutes c__Negativicutes o__ | 0       | 0.00738 | 0       | 0       | 0       | 0.00271 |
| k__Bacteria p__Firmicutes c__Negativicutes o__ | 0       | 0.00738 | 0       | 0       | 0       | 0.00271 |
| k__Bacteria p__Firmicutes c__Negativicutes o__ | 2.75157 | 1.55142 | 0.22509 | 0       | 0       | 0.00053 |
| k__Bacteria p__Firmicutes c__Negativicutes o__ | 0       | 0.00094 | 0       | 0       | 0       | 0.00013 |
| k__Bacteria p__Firmicutes c__Negativicutes o__ | 0.00076 | 0.09856 | 0       | 0       | 0       | 0.00041 |
| k__Bacteria p__Firmicutes c__Negativicutes o__ | 2.75082 | 1.45192 | 0.22509 | 0       | 0       | 0       |
| k__Bacteria p__Firmicutes c__Negativicutes o__ | 0.44659 | 0.51826 | 0.18325 | 0       | 0       | 0.03722 |
| k__Bacteria p__Firmicutes c__Negativicutes o__ | 0.44659 | 0.49946 | 0.18325 | 0       | 0       | 0       |
| k__Bacteria p__Firmicutes c__Negativicutes o__ | 0       | 0       | 0       | 0       | 0       | 0       |
| k__Bacteria p__Firmicutes c__Negativicutes o__ | 0       | 0.0188  | 0       | 0       | 0       | 0.03722 |
| k__Bacteria p__Firmicutes c__Negativicutes o__ | 0       | 0       | 0       | 0       | 0       | 0       |

|                                                 |         |         |         |         |         |         |
|-------------------------------------------------|---------|---------|---------|---------|---------|---------|
| k__Bacteria p__Firmicutes c__Negativicutes o__  | 0       | 0       | 0       | 0       | 0       | 0       |
| k__Bacteria p__Firmicutes c__Negativicutes o__  | 0.00166 | 0.2459  | 0.06878 | 0.04288 | 0.01932 | 0.65034 |
| k__Bacteria p__Firmicutes c__Negativicutes o__  | 0.00046 | 0.15683 | 0.03069 | 0       | 0       | 0.21049 |
| k__Bacteria p__Firmicutes c__Negativicutes o__  | 0.00121 | 0.00876 | 0.00103 | 0       | 0       | 0.08437 |
| k__Bacteria p__Firmicutes c__Negativicutes o__  | 0       | 0.01011 | 0.00127 | 0       | 0       | 0.00526 |
| k__Bacteria p__Firmicutes c__Negativicutes o__  | 0       | 0.04849 | 0.02747 | 0.04288 | 0.01932 | 0.24781 |
| k__Bacteria p__Firmicutes c__Negativicutes o__  | 0       | 0       | 0       | 0       | 0       | 0       |
| k__Bacteria p__Firmicutes c__Negativicutes o__  | 0       | 0       | 0       | 0       | 0       | 0       |
| k__Bacteria p__Firmicutes c__Negativicutes o__  | 0       | 0.00754 | 0.00157 | 0       | 0       | 0.06982 |
| k__Bacteria p__Firmicutes c__Negativicutes o__  | 0       | 0.01418 | 0.00674 | 0       | 0       | 0.0326  |
| k__Bacteria p__Firmicutes c__Tissierellia       | 0.01965 | 0.2897  | 0.00008 | 0.00035 | 0       | 0.003   |
| k__Bacteria p__Firmicutes c__Tissierellia o__Ti | 0.01965 | 0.2897  | 0.00008 | 0.00035 | 0       | 0.003   |
| k__Bacteria p__Firmicutes c__Tissierellia o__Ti | 0.01965 | 0.2897  | 0.00008 | 0.00035 | 0       | 0.003   |
| k__Bacteria p__Firmicutes c__Tissierellia o__Ti | 0       | 0       | 0       | 0       | 0       | 0       |
| k__Bacteria p__Firmicutes c__Tissierellia o__Ti | 0       | 0       | 0       | 0       | 0       | 0       |
| k__Bacteria p__Firmicutes c__Tissierellia o__Ti | 0       | 0       | 0       | 0       | 0       | 0       |
| k__Bacteria p__Firmicutes c__Tissierellia o__Ti | 0       | 0       | 0       | 0       | 0       | 0       |
| k__Bacteria p__Firmicutes c__Tissierellia o__Ti | 0       | 0       | 0       | 0       | 0       | 0       |
| k__Bacteria p__Firmicutes c__Tissierellia o__Ti | 0.01965 | 0.2897  | 0.00008 | 0.00035 | 0       | 0.003   |
| k__Bacteria p__Firmicutes c__Tissierellia o__Ti | 0.01965 | 0.28828 | 0.00008 | 0.00035 | 0       | 0.003   |
| k__Bacteria p__Firmicutes c__Tissierellia o__Ti | 0       | 0.00141 | 0       | 0       | 0       | 0       |
| k__Bacteria p__Firmicutes c__Tissierellia o__Ti | 0       | 0       | 0       | 0       | 0       | 0       |
| k__Bacteria p__Firmicutes c__Tissierellia o__Ti | 0       | 0       | 0       | 0       | 0       | 0       |
| k__Bacteria p__Firmicutes c__Tissierellia o__Ti | 0       | 0       | 0       | 0       | 0       | 0       |
| k__Bacteria p__Firmicutes c__Tissierellia o__Ti | 0       | 0       | 0       | 0       | 0       | 0       |
| k__Bacteria p__Firmicutes c__Tissierellia o__Ti | 0       | 0       | 0       | 0       | 0       | 0       |
| k__Bacteria p__Fusobacteria                     | 0.0186  | 0.20614 | 0.00265 | 0.89493 | 0.07642 | 3.72314 |
| k__Bacteria p__Fusobacteria c__Fusobacteriia    | 0.0186  | 0.20614 | 0.00265 | 0.89493 | 0.07642 | 3.72314 |
| k__Bacteria p__Fusobacteria c__Fusobacteriia    | 0.0186  | 0.20614 | 0.00265 | 0.89493 | 0.07642 | 3.72314 |
| k__Bacteria p__Fusobacteria c__Fusobacteriia    | 0.0186  | 0.20526 | 0.00265 | 0.89493 | 0.07642 | 3.72314 |
| k__Bacteria p__Fusobacteria c__Fusobacteriia    | 0       | 0       | 0       | 0       | 0       | 0       |
| k__Bacteria p__Fusobacteria c__Fusobacteriia    | 0       | 0       | 0       | 0       | 0       | 0       |
| k__Bacteria p__Fusobacteria c__Fusobacteriia    | 0.0186  | 0.20526 | 0.00265 | 0.89493 | 0.07642 | 3.72314 |
| k__Bacteria p__Fusobacteria c__Fusobacteriia    | 0       | 0       | 0       | 0       | 0       | 0       |
| k__Bacteria p__Fusobacteria c__Fusobacteriia    | 0       | 0       | 0       | 0.75923 | 0.07517 | 3.7015  |
| k__Bacteria p__Fusobacteria c__Fusobacteriia    | 0       | 0       | 0       | 0       | 0       | 0       |

|                                               |         |         |         |         |         |         |
|-----------------------------------------------|---------|---------|---------|---------|---------|---------|
| k__Bacteria p__Fusobacteria c__Fusobacteriia  | 0       | 0.02892 | 0       | 0.00031 | 0       | 0       |
| k__Bacteria p__Fusobacteria c__Fusobacteriia  | 0       | 0.00512 | 0       | 0       | 0       | 0       |
| k__Bacteria p__Fusobacteria c__Fusobacteriia  | 0       | 0       | 0       | 0       | 0       | 0       |
| k__Bacteria p__Fusobacteria c__Fusobacteriia  | 0       | 0       | 0       | 0       | 0       | 0       |
| k__Bacteria p__Fusobacteria c__Fusobacteriia  | 0.0186  | 0.17121 | 0.00265 | 0.13538 | 0.00126 | 0.02164 |
| k__Bacteria p__Fusobacteria c__Fusobacteriia  | 0       | 0.00088 | 0       | 0       | 0       | 0       |
| k__Bacteria p__Fusobacteria c__Fusobacteriia  | 0       | 0.00088 | 0       | 0       | 0       | 0       |
| k__Bacteria p__Fusobacteria c__Fusobacteriia  | 0       | 0       | 0       | 0       | 0       | 0       |
| k__Bacteria p__Fusobacteria c__Fusobacteriia  | 0       | 0       | 0       | 0       | 0       | 0       |
| k__Bacteria p__Fusobacteria c__Fusobacteriia  | 0       | 0       | 0       | 0       | 0       | 0       |
| k__Bacteria p__Fusobacteria c__Fusobacteriia  | 0       | 0.00088 | 0       | 0       | 0       | 0       |
| k__Bacteria p__Fusobacteria c__Fusobacteriia  | 0       | 0       | 0       | 0       | 0       | 0       |
| k__Bacteria p__Fusobacteria c__Fusobacteriia  | 0       | 0       | 0       | 0       | 0       | 0       |
| k__Bacteria p__Lentisphaerae                  | 0       | 0       | 0       | 0       | 0       | 0       |
| k__Bacteria p__Lentisphaerae c__Lentisphaeria | 0       | 0       | 0       | 0       | 0       | 0       |
| k__Bacteria p__Lentisphaerae c__Lentisphaeria | 0       | 0       | 0       | 0       | 0       | 0       |
| k__Bacteria p__Lentisphaerae c__Lentisphaeria | 0       | 0       | 0       | 0       | 0       | 0       |
| k__Bacteria p__Lentisphaerae c__Lentisphaeria | 0       | 0       | 0       | 0       | 0       | 0       |
| k__Bacteria p__Lentisphaerae c__Lentisphaeria | 0       | 0       | 0       | 0       | 0       | 0       |
| k__Bacteria p__Lentisphaerae c__Lentisphaeria | 0       | 0       | 0       | 0       | 0       | 0       |
| k__Bacteria p__Proteobacteria                 | 3.17912 | 5.42342 | 6.24285 | 8.94567 | 5.35436 | 4.66572 |
| k__Bacteria p__Proteobacteria c__Betaproteob: | 2.71377 | 2.47885 | 1.51145 | 1.81428 | 1.67329 | 2.39081 |
| k__Bacteria p__Proteobacteria c__Betaproteob: | 2.71377 | 2.32756 | 1.51145 | 1.81428 | 1.67329 | 2.39081 |
| k__Bacteria p__Proteobacteria c__Betaproteob: | 0       | 0       | 0.00052 | 0       | 0       | 0       |
| k__Bacteria p__Proteobacteria c__Betaproteob: | 0       | 0       | 0.00052 | 0       | 0       | 0       |
| k__Bacteria p__Proteobacteria c__Betaproteob: | 0       | 0       | 0.00052 | 0       | 0       | 0       |
| k__Bacteria p__Proteobacteria c__Betaproteob: | 0       | 0       | 0       | 0.00024 | 0       | 0       |
| k__Bacteria p__Proteobacteria c__Betaproteob: | 0       | 0       | 0       | 0.00024 | 0       | 0       |
| k__Bacteria p__Proteobacteria c__Betaproteob: | 0       | 0       | 0       | 0.00024 | 0       | 0       |
| k__Bacteria p__Proteobacteria c__Betaproteob: | 0.01211 | 0.11839 | 0.00995 | 0       | 0       | 0       |
| k__Bacteria p__Proteobacteria c__Betaproteob: | 0.01211 | 0.11839 | 0.00995 | 0       | 0       | 0       |
| k__Bacteria p__Proteobacteria c__Betaproteob: | 0.01211 | 0.11839 | 0.00995 | 0       | 0       | 0       |
| k__Bacteria p__Proteobacteria c__Betaproteob: | 2.70166 | 2.20916 | 1.50098 | 1.81404 | 1.67329 | 2.39081 |
| k__Bacteria p__Proteobacteria c__Betaproteob: | 2.60687 | 2.12553 | 1.45084 | 0       | 0       | 0       |
| k__Bacteria p__Proteobacteria c__Betaproteob: | 2.60687 | 2.12553 | 1.45084 | 0       | 0       | 0       |
| k__Bacteria p__Proteobacteria c__Betaproteob: | 0       | 0       | 0       | 1.81404 | 1.67329 | 2.39081 |
| k__Bacteria p__Proteobacteria c__Betaproteob: | 0       | 0       | 0       | 1.81404 | 1.67329 | 2.39081 |

|                                               |         |         |         |         |         |         |
|-----------------------------------------------|---------|---------|---------|---------|---------|---------|
| k__Bacteria p__Proteobacteria c__Betaproteob: | 0.09479 | 0.08364 | 0.05014 | 0       | 0       | 0       |
| k__Bacteria p__Proteobacteria c__Betaproteob: | 0.09479 | 0.08364 | 0.05014 | 0       | 0       | 0       |
| k__Bacteria p__Proteobacteria c__Betaproteob: | 0       | 0.15129 | 0       | 0       | 0       | 0       |
| k__Bacteria p__Proteobacteria c__Betaproteob: | 0       | 0.15129 | 0       | 0       | 0       | 0       |
| k__Bacteria p__Proteobacteria c__Betaproteob: | 0       | 0.00616 | 0       | 0       | 0       | 0       |
| k__Bacteria p__Proteobacteria c__Betaproteob: | 0       | 0.00616 | 0       | 0       | 0       | 0       |
| k__Bacteria p__Proteobacteria c__Betaproteob: | 0       | 0.14513 | 0       | 0       | 0       | 0       |
| k__Bacteria p__Proteobacteria c__Betaproteob: | 0       | 0       | 0       | 0       | 0       | 0       |
| k__Bacteria p__Proteobacteria c__Betaproteob: | 0       | 0.11459 | 0       | 0       | 0       | 0       |
| k__Bacteria p__Proteobacteria c__Betaproteob: | 0       | 0.01354 | 0       | 0       | 0       | 0       |
| k__Bacteria p__Proteobacteria c__Betaproteob: | 0       | 0.00828 | 0       | 0       | 0       | 0       |
| k__Bacteria p__Proteobacteria c__Betaproteob: | 0       | 0.00872 | 0       | 0       | 0       | 0       |
| k__Bacteria p__Proteobacteria c__Deltaproteob | 0.15516 | 0.19132 | 0.1346  | 0.27091 | 0       | 0.16462 |
| k__Bacteria p__Proteobacteria c__Deltaproteob | 0.15516 | 0.19132 | 0.1346  | 0.27091 | 0       | 0.16462 |
| k__Bacteria p__Proteobacteria c__Deltaproteob | 0.15516 | 0.19132 | 0.1346  | 0.27091 | 0       | 0.16462 |
| k__Bacteria p__Proteobacteria c__Deltaproteob | 0.15516 | 0.19132 | 0.1346  | 0.02022 | 0       | 0.05699 |
| k__Bacteria p__Proteobacteria c__Deltaproteob | 0.15516 | 0.19132 | 0.1346  | 0.02022 | 0       | 0.05699 |
| k__Bacteria p__Proteobacteria c__Deltaproteob | 0       | 0       | 0       | 0.25068 | 0       | 0.10763 |
| k__Bacteria p__Proteobacteria c__Deltaproteob | 0       | 0       | 0       | 0       | 0       | 0       |
| k__Bacteria p__Proteobacteria c__Deltaproteob | 0       | 0       | 0       | 0.25068 | 0       | 0.10763 |
| k__Bacteria p__Proteobacteria c__Epsilonprote | 0       | 0.02459 | 0.00015 | 0       | 0       | 0       |
| k__Bacteria p__Proteobacteria c__Epsilonprote | 0       | 0.02459 | 0.00015 | 0       | 0       | 0       |
| k__Bacteria p__Proteobacteria c__Epsilonprote | 0       | 0.02459 | 0.00015 | 0       | 0       | 0       |
| k__Bacteria p__Proteobacteria c__Epsilonprote | 0       | 0.02459 | 0.00015 | 0       | 0       | 0       |
| k__Bacteria p__Proteobacteria c__Epsilonprote | 0       | 0.01728 | 0.00015 | 0       | 0       | 0       |
| k__Bacteria p__Proteobacteria c__Epsilonprote | 0       | 0       | 0       | 0       | 0       | 0       |
| k__Bacteria p__Proteobacteria c__Epsilonprote | 0       | 0       | 0       | 0       | 0       | 0       |
| k__Bacteria p__Proteobacteria c__Epsilonprote | 0       | 0       | 0       | 0       | 0       | 0       |
| k__Bacteria p__Proteobacteria c__Epsilonprote | 0       | 0.00731 | 0       | 0       | 0       | 0       |
| k__Bacteria p__Proteobacteria c__Epsilonprote | 0       | 0       | 0       | 0       | 0       | 0       |
| k__Bacteria p__Proteobacteria c__Epsilonprote | 0       | 0       | 0       | 0       | 0       | 0       |
| k__Bacteria p__Proteobacteria c__Epsilonprote | 0       | 0       | 0       | 0       | 0       | 0       |
| k__Bacteria p__Proteobacteria c__Epsilonprote | 0       | 0       | 0       | 0       | 0       | 0       |
| k__Bacteria p__Proteobacteria c__Gammaprote   | 0.18983 | 2.63569 | 4.52851 | 6.86048 | 3.68107 | 2.1103  |
| k__Bacteria p__Proteobacteria c__Gammaprote   | 0       | 0       | 0       | 0       | 0       | 0       |

|                                             |         |         |         |         |         |         |
|---------------------------------------------|---------|---------|---------|---------|---------|---------|
| k__Bacteria p__Proteobacteria c__Gammaprote | 0       | 0       | 0       | 0       | 0       | 0       |
| k__Bacteria p__Proteobacteria c__Gammaprote | 0       | 0       | 0       | 0       | 0       | 0       |
| k__Bacteria p__Proteobacteria c__Gammaprote | 0       | 0       | 0       | 0       | 0       | 0       |
| k__Bacteria p__Proteobacteria c__Gammaprote | 0       | 0       | 0       | 0       | 0       | 0       |
| k__Bacteria p__Proteobacteria c__Gammaprote | 0       | 0       | 0       | 0       | 0       | 0       |
| k__Bacteria p__Proteobacteria c__Gammaprote | 0       | 0       | 0       | 0       | 0       | 0       |
| k__Bacteria p__Proteobacteria c__Gammaprote | 0       | 0       | 0       | 0       | 0       | 0       |
| k__Bacteria p__Proteobacteria c__Gammaprote | 0       | 0       | 0       | 0       | 0       | 0       |
| k__Bacteria p__Proteobacteria c__Gammaprote | 0       | 0       | 0       | 0       | 0       | 0       |
| k__Bacteria p__Proteobacteria c__Gammaprote | 0       | 0       | 0       | 0       | 0       | 0       |
| k__Bacteria p__Proteobacteria c__Gammaprote | 0       | 0       | 0       | 0       | 0       | 0       |
| k__Bacteria p__Proteobacteria c__Gammaprote | 0       | 0       | 0       | 0       | 0       | 0       |
| k__Bacteria p__Proteobacteria c__Gammaprote | 0       | 0       | 0       | 0       | 0       | 0       |
| k__Bacteria p__Proteobacteria c__Gammaprote | 0       | 0       | 0       | 0       | 0       | 0       |
| k__Bacteria p__Proteobacteria c__Gammaprote | 0.18983 | 1.75169 | 4.44838 | 6.86048 | 3.68107 | 2.10024 |
| k__Bacteria p__Proteobacteria c__Gammaprote | 0       | 0       | 0       | 0       | 0       | 0       |
| k__Bacteria p__Proteobacteria c__Gammaprote | 0       | 0       | 0       | 0       | 0       | 0       |
| k__Bacteria p__Proteobacteria c__Gammaprote | 0       | 0       | 0       | 0       | 0       | 0       |
| k__Bacteria p__Proteobacteria c__Gammaprote | 0.18983 | 1.75169 | 4.44838 | 6.86048 | 3.68107 | 2.10024 |
| k__Bacteria p__Proteobacteria c__Gammaprote | 0.01233 | 0.09176 | 0       | 0       | 0       | 0       |
| k__Bacteria p__Proteobacteria c__Gammaprote | 0.00101 | 0.03848 | 0       | 0       | 0       | 0       |
| k__Bacteria p__Proteobacteria c__Gammaprote | 0       | 0       | 0       | 0       | 0       | 0       |
| k__Bacteria p__Proteobacteria c__Gammaprote | 0       | 0       | 0       | 0       | 0       | 0       |
| k__Bacteria p__Proteobacteria c__Gammaprote | 0       | 0.00513 | 0       | 0       | 0       | 0       |
| k__Bacteria p__Proteobacteria c__Gammaprote | 0.00191 | 0.00874 | 0       | 0       | 0       | 0       |
| k__Bacteria p__Proteobacteria c__Gammaprote | 0       | 0       | 0       | 0       | 0       | 0       |
| k__Bacteria p__Proteobacteria c__Gammaprote | 0       | 0       | 0       | 0       | 0       | 0       |
| k__Bacteria p__Proteobacteria c__Gammaprote | 0.00097 | 0.01344 | 0       | 0       | 0       | 0       |
| k__Bacteria p__Proteobacteria c__Gammaprote | 0       | 0.0003  | 0       | 0       | 0       | 0       |
| k__Bacteria p__Proteobacteria c__Gammaprote | 0       | 0       | 0       | 0       | 0       | 0       |
| k__Bacteria p__Proteobacteria c__Gammaprote | 0.00844 | 0.02568 | 0       | 0       | 0       | 0       |
| k__Bacteria p__Proteobacteria c__Gammaprote | 0       | 0       | 0       | 0       | 0       | 0       |
| k__Bacteria p__Proteobacteria c__Gammaprote | 0       | 0       | 0       | 0       | 0       | 0       |
| k__Bacteria p__Proteobacteria c__Gammaprote | 0       | 0       | 0.0243  | 0.00157 | 0       | 0       |
| k__Bacteria p__Proteobacteria c__Gammaprote | 0       | 0       | 0.00179 | 0       | 0       | 0       |
| k__Bacteria p__Proteobacteria c__Gammaprote | 0       | 0       | 0.01084 | 0.00157 | 0       | 0       |

|                                             |         |         |         |         |         |         |
|---------------------------------------------|---------|---------|---------|---------|---------|---------|
| k__Bacteria p__Proteobacteria c__Gammaprote | 0       | 0       | 0.01167 | 0       | 0       | 0       |
| k__Bacteria p__Proteobacteria c__Gammaprote | 0.15583 | 1.58515 | 0.02258 | 6.83818 | 3.68107 | 2.10024 |
| k__Bacteria p__Proteobacteria c__Gammaprote | 0.15583 | 1.58515 | 0.02258 | 6.83818 | 3.68107 | 2.10024 |
| k__Bacteria p__Proteobacteria c__Gammaprote | 0       | 0       | 0       | 0       | 0       | 0       |
| k__Bacteria p__Proteobacteria c__Gammaprote | 0.02167 | 0.07478 | 4.39893 | 0.02072 | 0       | 0       |
| k__Bacteria p__Proteobacteria c__Gammaprote | 0       | 0.0064  | 0       | 0       | 0       | 0       |
| k__Bacteria p__Proteobacteria c__Gammaprote | 0       | 0       | 0       | 0       | 0       | 0       |
| k__Bacteria p__Proteobacteria c__Gammaprote | 0       | 0       | 0       | 0       | 0       | 0       |
| k__Bacteria p__Proteobacteria c__Gammaprote | 0.01945 | 0.05293 | 2.36269 | 0.01106 | 0       | 0       |
| k__Bacteria p__Proteobacteria c__Gammaprote | 0       | 0.00216 | 1.06942 | 0.0072  | 0       | 0       |
| k__Bacteria p__Proteobacteria c__Gammaprote | 0.00222 | 0.01329 | 0.96681 | 0.00246 | 0       | 0       |
| k__Bacteria p__Proteobacteria c__Gammaprote | 0       | 0       | 0       | 0       | 0       | 0       |
| k__Bacteria p__Proteobacteria c__Gammaprote | 0       | 0       | 0       | 0       | 0       | 0       |
| k__Bacteria p__Proteobacteria c__Gammaprote | 0       | 0       | 0       | 0       | 0       | 0       |
| k__Bacteria p__Proteobacteria c__Gammaprote | 0       | 0       | 0       | 0       | 0       | 0       |
| k__Bacteria p__Proteobacteria c__Gammaprote | 0       | 0       | 0.00258 | 0       | 0       | 0       |
| k__Bacteria p__Proteobacteria c__Gammaprote | 0       | 0       | 0.00258 | 0       | 0       | 0       |
| k__Bacteria p__Proteobacteria c__Gammaprote | 0       | 0       | 0       | 0       | 0       | 0       |
| k__Bacteria p__Proteobacteria c__Gammaprote | 0       | 0       | 0       | 0       | 0       | 0       |
| k__Bacteria p__Proteobacteria c__Gammaprote | 0       | 0       | 0       | 0       | 0       | 0       |
| k__Bacteria p__Proteobacteria c__Gammaprote | 0       | 0       | 0       | 0       | 0       | 0       |
| k__Bacteria p__Proteobacteria c__Gammaprote | 0       | 0       | 0       | 0       | 0       | 0       |
| k__Bacteria p__Proteobacteria c__Gammaprote | 0       | 0       | 0       | 0       | 0       | 0       |
| k__Bacteria p__Proteobacteria c__Gammaprote | 0       | 0       | 0       | 0       | 0       | 0       |
| k__Bacteria p__Proteobacteria c__Gammaprote | 0       | 0       | 0       | 0       | 0       | 0       |
| k__Bacteria p__Proteobacteria c__Gammaprote | 0       | 0       | 0       | 0       | 0       | 0       |
| k__Bacteria p__Proteobacteria c__Gammaprote | 0       | 0.88399 | 0.08013 | 0       | 0       | 0.01005 |
| k__Bacteria p__Proteobacteria c__Gammaprote | 0       | 0.88399 | 0.08013 | 0       | 0       | 0.01005 |
| k__Bacteria p__Proteobacteria c__Gammaprote | 0       | 0.08831 | 0.00073 | 0       | 0       | 0       |
| k__Bacteria p__Proteobacteria c__Gammaprote | 0       | 0.08327 | 0       | 0       | 0       | 0       |
| k__Bacteria p__Proteobacteria c__Gammaprote | 0       | 0.00504 | 0.00073 | 0       | 0       | 0       |
| k__Bacteria p__Proteobacteria c__Gammaprote | 0       | 0.79569 | 0.0794  | 0       | 0       | 0.01005 |
| k__Bacteria p__Proteobacteria c__Gammaprote | 0       | 0.01066 | 0       | 0       | 0       | 0       |
| k__Bacteria p__Proteobacteria c__Gammaprote | 0       | 0       | 0       | 0       | 0       | 0       |

|                                                |         |         |         |         |   |         |
|------------------------------------------------|---------|---------|---------|---------|---|---------|
| k__Bacteria p__Proteobacteria c__Gammaprote    | 0       | 0.61975 | 0.05067 | 0       | 0 | 0.01005 |
| k__Bacteria p__Proteobacteria c__Gammaprote    | 0       | 0.01245 | 0.00027 | 0       | 0 | 0       |
| k__Bacteria p__Proteobacteria c__Gammaprote    | 0       | 0       | 0       | 0       | 0 | 0       |
| k__Bacteria p__Proteobacteria c__Gammaprote    | 0       | 0       | 0.00343 | 0       | 0 | 0       |
| k__Bacteria p__Proteobacteria c__Gammaprote    | 0       | 0.15283 | 0.02504 | 0       | 0 | 0       |
| k__Bacteria p__Proteobacteria c__Gammaprote    | 0       | 0       | 0       | 0       | 0 | 0       |
| k__Bacteria p__Proteobacteria c__Gammaprote    | 0       | 0       | 0       | 0       | 0 | 0       |
| k__Bacteria p__Proteobacteria c__Gammaprote    | 0       | 0       | 0       | 0       | 0 | 0       |
| k__Bacteria p__Proteobacteria c__Gammaprote    | 0       | 0       | 0       | 0       | 0 | 0       |
| k__Bacteria p__Proteobacteria c__Gammaprote    | 0       | 0       | 0       | 0       | 0 | 0       |
| k__Bacteria p__Proteobacteria c__Gammaprote    | 0       | 0       | 0       | 0       | 0 | 0       |
| k__Bacteria p__Proteobacteria c__Gammaprote    | 0       | 0       | 0       | 0       | 0 | 0       |
| k__Bacteria p__Proteobacteria c__Proteobacter  | 0.12036 | 0.09297 | 0.06814 | 0       | 0 | 0       |
| k__Bacteria p__Proteobacteria c__Proteobacter  | 0.12036 | 0.09297 | 0.06814 | 0       | 0 | 0       |
| k__Bacteria p__Proteobacteria c__Proteobacter  | 0.12036 | 0.09297 | 0.06814 | 0       | 0 | 0       |
| k__Bacteria p__Proteobacteria c__Proteobacter  | 0.12036 | 0.09297 | 0.06814 | 0       | 0 | 0       |
| k__Bacteria p__Proteobacteria c__Proteobacter  | 0.12036 | 0.09297 | 0.06814 | 0       | 0 | 0       |
| k__Bacteria p__Synergistetes                   | 0.22912 | 0.49442 | 0.0268  | 0.02616 | 0 | 0       |
| k__Bacteria p__Synergistetes c__Synergistia    | 0.22912 | 0.49442 | 0.0268  | 0.02616 | 0 | 0       |
| k__Bacteria p__Synergistetes c__Synergistia o_ | 0.22912 | 0.49442 | 0.0268  | 0.02616 | 0 | 0       |
| k__Bacteria p__Synergistetes c__Synergistia o_ | 0.22912 | 0.49442 | 0.0268  | 0.02616 | 0 | 0       |
| k__Bacteria p__Synergistetes c__Synergistia o_ | 0.02452 | 0.20054 | 0.01885 | 0.02616 | 0 | 0       |
| k__Bacteria p__Synergistetes c__Synergistia o_ | 0.0052  | 0.06313 | 0.00229 | 0.02616 | 0 | 0       |
| k__Bacteria p__Synergistetes c__Synergistia o_ | 0.01933 | 0.13741 | 0.01656 | 0       | 0 | 0       |
| k__Bacteria p__Synergistetes c__Synergistia o_ | 0       | 0.0015  | 0       | 0       | 0 | 0       |
| k__Bacteria p__Synergistetes c__Synergistia o_ | 0       | 0.0015  | 0       | 0       | 0 | 0       |
| k__Bacteria p__Synergistetes c__Synergistia o_ | 0.2046  | 0.29238 | 0.00795 | 0       | 0 | 0       |
| k__Bacteria p__Synergistetes c__Synergistia o_ | 0.2005  | 0.28551 | 0.00795 | 0       | 0 | 0       |
| k__Bacteria p__Synergistetes c__Synergistia o_ | 0.0041  | 0.00687 | 0       | 0       | 0 | 0       |
| k__Bacteria p__Tenericutes                     | 0       | 0       | 0       | 0       | 0 | 0       |
| k__Bacteria p__Tenericutes c__Mollicutes       | 0       | 0       | 0       | 0       | 0 | 0       |
| k__Bacteria p__Tenericutes c__Mollicutes o__M  | 0       | 0       | 0       | 0       | 0 | 0       |
| k__Bacteria p__Tenericutes c__Mollicutes o__M  | 0       | 0       | 0       | 0       | 0 | 0       |
| k__Bacteria p__Tenericutes c__Mollicutes o__M  | 0       | 0       | 0       | 0       | 0 | 0       |
| k__Bacteria p__Tenericutes c__Mollicutes o__M  | 0       | 0       | 0       | 0       | 0 | 0       |





| AP003_1 | AP003_2 | AP003_3 | AP004_1 | AP004_2  | AP004_3 | AP005_1 | AP005_2 |
|---------|---------|---------|---------|----------|---------|---------|---------|
| 100     | 100     | 100     | 100     | 99.78705 | 99.9923 | 100     | 100     |
| 0.06822 | 0.51562 | 0.10298 | 0.61818 | 1.15181  | 0.0021  | 0.31094 | 0.05724 |
| 0.01442 | 0.0059  | 0.09202 | 0.59032 | 1.15181  | 0.0021  | 0.01345 | 0.00718 |
| 0.00434 | 0.00197 | 0.08926 | 0.13286 | 0.09001  | 0       | 0.00431 | 0.00718 |
| 0.00434 | 0.00197 | 0.08926 | 0.13286 | 0.09001  | 0       | 0.00431 | 0.00718 |
| 0       | 0.00084 | 0       | 0       | 0        | 0       | 0       | 0.00621 |
| 0       | 0.00084 | 0       | 0       | 0        | 0       | 0       | 0.00621 |
| 0.00434 | 0.00113 | 0.08926 | 0.13286 | 0.09001  | 0       | 0.00431 | 0.00097 |
| 0       | 0       | 0       | 0       | 0        | 0       | 0       | 0       |
| 0       | 0       | 0.03335 | 0.07834 | 0.08813  | 0       | 0       | 0       |
| 0       | 0       | 0       | 0       | 0        | 0       | 0       | 0       |
| 0       | 0       | 0       | 0       | 0        | 0       | 0       | 0       |
| 0       | 0       | 0       | 0       | 0        | 0       | 0       | 0       |
| 0       | 0       | 0.00067 | 0       | 0        | 0       | 0       | 0       |
| 0.00043 | 0       | 0.00319 | 0.00979 | 0.0009   | 0       | 0.00179 | 0.00083 |
| 0       | 0       | 0.00785 | 0.00953 | 0        | 0       | 0       | 0       |
| 0       | 0       | 0.00245 | 0.01692 | 0.00006  | 0       | 0       | 0       |
| 0       | 0       | 0       | 0       | 0        | 0       | 0       | 0       |
| 0.00391 | 0       | 0.04044 | 0.00099 | 0        | 0       | 0.00252 | 0       |
| 0       | 0       | 0.0013  | 0.00598 | 0        | 0       | 0       | 0.00015 |
| 0       | 0       | 0       | 0       | 0        | 0       | 0       | 0       |
| 0       | 0       | 0       | 0.0113  | 0.00093  | 0       | 0       | 0       |
| 0       | 0.00113 | 0       | 0       | 0        | 0       | 0       | 0       |
| 0       | 0       | 0       | 0       | 0        | 0       | 0       | 0       |
| 0       | 0       | 0       | 0       | 0        | 0       | 0       | 0       |
| 0       | 0       | 0       | 0       | 0        | 0       | 0       | 0       |
| 0.01001 | 0.0001  | 0.00277 | 0.41473 | 0.00509  | 0.00072 | 0.00418 | 0       |
| 0.01001 | 0.0001  | 0.00277 | 0.41473 | 0.00509  | 0.00072 | 0.00418 | 0       |
| 0       | 0       | 0       | 0       | 0        | 0       | 0       | 0       |
| 0       | 0       | 0       | 0       | 0        | 0       | 0       | 0       |
| 0       | 0       | 0       | 0       | 0        | 0       | 0       | 0       |
| 0       | 0       | 0       | 0       | 0        | 0       | 0       | 0       |
| 0.01001 | 0       | 0       | 0.4106  | 0.00223  | 0       | 0.00418 | 0       |

|         |         |         |         |         |         |         |         |
|---------|---------|---------|---------|---------|---------|---------|---------|
| 0       | 0       | 0       | 0       | 0       | 0       | 0       | 0       |
| 0.00425 | 0       | 0       | 0       | 0       | 0       | 0       | 0       |
| 0       | 0       | 0       | 0       | 0       | 0       | 0       | 0       |
| 0       | 0       | 0       | 0       | 0       | 0       | 0       | 0       |
| 0       | 0       | 0       | 0.4106  | 0.00223 | 0       | 0       | 0       |
| 0       | 0       | 0       | 0       | 0       | 0       | 0       | 0       |
| 0.00577 | 0       | 0       | 0       | 0       | 0       | 0.00418 | 0       |
| 0       | 0       | 0       | 0       | 0       | 0       | 0       | 0       |
| 0       | 0       | 0       | 0       | 0       | 0       | 0       | 0       |
| 0       | 0.0001  | 0.00277 | 0.00413 | 0.00286 | 0.00072 | 0       | 0       |
| 0       | 0.0001  | 0.00277 | 0.00413 | 0.00286 | 0.00072 | 0       | 0       |
| 0       | 0       | 0       | 0.03693 | 1.05426 | 0.00139 | 0       | 0       |
| 0       | 0       | 0       | 0.03693 | 1.05426 | 0.00139 | 0       | 0       |
| 0       | 0       | 0       | 0.03693 | 1.05426 | 0.00139 | 0       | 0       |
| 0       | 0       | 0       | 0.03693 | 0       | 0       | 0       | 0       |
| 0       | 0       | 0       | 0       | 0       | 0       | 0       | 0       |
| 0       | 0       | 0       | 0       | 1.05426 | 0.00139 | 0       | 0       |
| 0.00006 | 0       | 0       | 0.0058  | 0.00244 | 0       | 0       | 0       |
| 0.00006 | 0       | 0       | 0.0058  | 0.00244 | 0       | 0       | 0       |
| 0.00006 | 0       | 0       | 0.0058  | 0.00244 | 0       | 0       | 0       |
| 0       | 0       | 0       | 0.00125 | 0       | 0       | 0       | 0       |
| 0       | 0       | 0       | 0       | 0       | 0       | 0       | 0       |
| 0.00006 | 0       | 0       | 0.00455 | 0.00244 | 0       | 0       | 0       |
| 0       | 0.00383 | 0       | 0       | 0       | 0       | 0.00497 | 0       |
| 0       | 0.00383 | 0       | 0       | 0       | 0       | 0.00497 | 0       |
| 0       | 0.00383 | 0       | 0       | 0       | 0       | 0.00497 | 0       |
| 0       | 0.00383 | 0       | 0       | 0       | 0       | 0.00497 | 0       |
| 0       | 0       | 0       | 0       | 0       | 0       | 0       | 0       |
| 0       | 0       | 0       | 0       | 0       | 0       | 0       | 0       |
| 0.05381 | 0.50972 | 0.01096 | 0.02786 | 0       | 0       | 0.29749 | 0.05006 |
| 0.00525 | 0       | 0.00256 | 0.02786 | 0       | 0       | 0.1209  | 0       |
| 0       | 0       | 0.0008  | 0.02786 | 0       | 0       | 0.00737 | 0       |
| 0       | 0       | 0.0008  | 0.00125 | 0       | 0       | 0.00737 | 0       |
| 0       | 0       | 0       | 0       | 0       | 0       | 0       | 0       |
| 0       | 0       | 0.0008  | 0.00125 | 0       | 0       | 0.00737 | 0       |

|          |         |          |         |         |         |          |          |
|----------|---------|----------|---------|---------|---------|----------|----------|
| 0        | 0       | 0        | 0       | 0       | 0       | 0        | 0        |
| 0        | 0       | 0        | 0.02661 | 0       | 0       | 0        | 0        |
| 0        | 0       | 0        | 0       | 0       | 0       | 0        | 0        |
| 0        | 0       | 0        | 0.02661 | 0       | 0       | 0        | 0        |
| 0.00525  | 0       | 0.00176  | 0       | 0       | 0       | 0.11354  | 0        |
| 0.00166  | 0       | 0.00176  | 0       | 0       | 0       | 0.11354  | 0        |
| 0.00063  | 0       | 0.00033  | 0       | 0       | 0       | 0.11091  | 0        |
| 0.00061  | 0       | 0.00134  | 0       | 0       | 0       | 0.00048  | 0        |
| 0.00042  | 0       | 0.0001   | 0       | 0       | 0       | 0.00215  | 0        |
| 0.00359  | 0       | 0        | 0       | 0       | 0       | 0        | 0        |
| 0        | 0       | 0        | 0       | 0       | 0       | 0        | 0        |
| 0.00359  | 0       | 0        | 0       | 0       | 0       | 0        | 0        |
| 0.04856  | 0.50972 | 0.0084   | 0       | 0       | 0       | 0.17658  | 0.05006  |
| 0.04856  | 0.50972 | 0.0084   | 0       | 0       | 0       | 0.17658  | 0.05006  |
| 0        | 0       | 0        | 0       | 0       | 0       | 0        | 0        |
| 0        | 0       | 0        | 0       | 0       | 0       | 0        | 0        |
| 0        | 0       | 0        | 0       | 0       | 0       | 0        | 0        |
| 0        | 0       | 0        | 0       | 0       | 0       | 0        | 0        |
| 0.04595  | 0.46876 | 0.00777  | 0       | 0       | 0       | 0.15756  | 0.0451   |
| 0.04595  | 0.46876 | 0.00777  | 0       | 0       | 0       | 0.15756  | 0.0451   |
| 0        | 0       | 0        | 0       | 0       | 0       | 0        | 0        |
| 0        | 0       | 0        | 0       | 0       | 0       | 0        | 0        |
| 0.0026   | 0.04096 | 0.00063  | 0       | 0       | 0       | 0.01902  | 0.00496  |
| 0.0026   | 0.04096 | 0.00063  | 0       | 0       | 0       | 0.01902  | 0.00496  |
| 0        | 0       | 0        | 0       | 0       | 0       | 0        | 0        |
| 0        | 0       | 0        | 0       | 0       | 0       | 0        | 0        |
| 59.14788 | 3.36964 | 25.36972 | 0.00954 | 0.00223 | 0.00766 | 63.54947 | 20.61378 |
| 0        | 0       | 0        | 0       | 0       | 0       | 0        | 0        |
| 0        | 0       | 0        | 0       | 0       | 0       | 0        | 0        |
| 0        | 0       | 0        | 0       | 0       | 0       | 0        | 0        |
| 0        | 0       | 0        | 0       | 0       | 0       | 0        | 0        |
| 0        | 0       | 0        | 0       | 0       | 0       | 0        | 0        |
| 59.14788 | 3.36964 | 25.36972 | 0.00954 | 0.00223 | 0.00766 | 63.54947 | 20.61378 |
| 59.14788 | 3.36964 | 25.36972 | 0.00954 | 0.00223 | 0.00766 | 63.54947 | 20.61378 |
| 52.96292 | 3.1613  | 23.00454 | 0.00954 | 0.0008  | 0.00766 | 35.80528 | 5.47107  |

|          |         |          |         |         |         |          |         |
|----------|---------|----------|---------|---------|---------|----------|---------|
| 52.96292 | 3.1613  | 23.00454 | 0.00954 | 0.0008  | 0.00766 | 35.80528 | 5.47107 |
| 0.09284  | 0       | 2.36506  | 0       | 0       | 0       | 0        | 0       |
| 0.19764  | 0       | 0        | 0       | 0       | 0       | 0.00841  | 0.00755 |
| 1.5081   | 0       | 0        | 0       | 0       | 0       | 0        | 0       |
| 21.30127 | 0.05092 | 4.02257  | 0       | 0       | 0       | 0.00017  | 0       |
| 0.00103  | 0       | 0.17734  | 0       | 0       | 0       | 0        | 0       |
| 0        | 0       | 0        | 0       | 0       | 0       | 0        | 0       |
| 0        | 0       | 0        | 0       | 0       | 0       | 0        | 0       |
| 0        | 0       | 0        | 0       | 0       | 0       | 0.15416  | 0       |
| 10.03033 | 0.1016  | 6.28894  | 0.00109 | 0       | 0.00101 | 0.05913  | 0.12218 |
| 0.02504  | 0.05258 | 0.00138  | 0       | 0       | 0       | 0.16789  | 0.00796 |
| 0        | 0       | 0        | 0       | 0       | 0       | 0        | 0       |
| 0        | 0       | 0        | 0       | 0       | 0       | 0        | 0       |
| 0.0258   | 0.00326 | 0.14118  | 0       | 0       | 0       | 1.02658  | 0.85947 |
| 11.06317 | 0       | 0        | 0       | 0       | 0       | 0        | 0       |
| 0        | 0       | 0        | 0       | 0       | 0       | 0        | 0       |
| 0.25459  | 0       | 0.5702   | 0       | 0       | 0       | 0        | 0       |
| 1.60368  | 0.25133 | 0.0701   | 0       | 0       | 0       | 0        | 0       |
| 0.00015  | 0       | 0        | 0.00118 | 0       | 0.00082 | 1.66699  | 0.04495 |
| 0.40217  | 0.45094 | 1.31105  | 0.0002  | 0       | 0.0005  | 1.94047  | 0.77306 |
| 2.18826  | 1.60972 | 1.4452   | 0.00287 | 0.00004 | 0.0013  | 3.52388  | 0.58104 |
| 2.06258  | 0.00091 | 5.9626   | 0.0042  | 0.00075 | 0.00402 | 27.19363 | 2.62012 |
| 2.20628  | 0.64003 | 0.64892  | 0       | 0       | 0       | 0.06397  | 0.45473 |
| 0        | 0       | 0.03985  | 0       | 0       | 0       | 0        | 0       |
| 0        | 0       | 0        | 0       | 0       | 0       | 0        | 0       |
| 0        | 0       | 0        | 0       | 0       | 0       | 0        | 0       |
| 0        | 0       | 0.03985  | 0       | 0       | 0       | 0        | 0       |
| 0        | 0       | 0.03985  | 0       | 0       | 0       | 0        | 0       |
| 0        | 0       | 0        | 0       | 0       | 0       | 0        | 0       |
| 0.53918  | 0.13416 | 0.00312  | 0       | 0       | 0       | 4.59182  | 0.84351 |
| 0.53918  | 0.13416 | 0.00312  | 0       | 0       | 0       | 4.59182  | 0.84351 |
| 0.00075  | 0.00195 | 0        | 0       | 0       | 0       | 0        | 0       |
| 0.53844  | 0.13221 | 0.00312  | 0       | 0       | 0       | 4.59182  | 0.84351 |
| 0        | 0       | 0        | 0       | 0       | 0       | 0        | 0       |
| 0        | 0       | 0        | 0       | 0       | 0       | 0        | 0       |

|         |         |         |   |         |   |          |         |
|---------|---------|---------|---|---------|---|----------|---------|
| 0       | 0       | 0       | 0 | 0       | 0 | 0        | 0       |
| 0       | 0       | 0       | 0 | 0       | 0 | 0        | 0       |
| 0       | 0       | 0       | 0 | 0       | 0 | 0        | 0       |
| 0       | 0       | 0       | 0 | 0       | 0 | 0        | 0       |
| 0       | 0       | 0       | 0 | 0       | 0 | 0        | 0       |
| 0       | 0       | 0       | 0 | 0       | 0 | 0        | 0       |
| 0       | 0       | 0       | 0 | 0       | 0 | 0        | 0       |
| 0       | 0       | 0       | 0 | 0       | 0 | 0        | 0       |
| 0.23387 | 0       | 1.41455 | 0 | 0.00143 | 0 | 0.81885  | 0.8298  |
| 0       | 0       | 0       | 0 | 0       | 0 | 0        | 0.00011 |
| 0       | 0       | 0       | 0 | 0       | 0 | 0        | 0.00011 |
| 0.22826 | 0       | 1.41208 | 0 | 0       | 0 | 0        | 0       |
| 0.09049 | 0       | 0.60065 | 0 | 0       | 0 | 0        | 0       |
| 0.13778 | 0       | 0.81142 | 0 | 0       | 0 | 0        | 0       |
| 0.00561 | 0       | 0.00247 | 0 | 0.00143 | 0 | 0.81885  | 0.82969 |
| 0       | 0       | 0       | 0 | 0       | 0 | 0.0051   | 0.00914 |
| 0       | 0       | 0       | 0 | 0       | 0 | 0        | 0       |
| 0       | 0       | 0.00247 | 0 | 0       | 0 | 0        | 0       |
| 0.00358 | 0       | 0       | 0 | 0       | 0 | 0        | 0       |
| 0       | 0       | 0       | 0 | 0.00143 | 0 | 0.81375  | 0.82055 |
| 0       | 0       | 0       | 0 | 0       | 0 | 0        | 0       |
| 0       | 0       | 0       | 0 | 0       | 0 | 0        | 0       |
| 0       | 0       | 0       | 0 | 0       | 0 | 0        | 0       |
| 0       | 0       | 0       | 0 | 0       | 0 | 0        | 0       |
| 0       | 0       | 0       | 0 | 0       | 0 | 0        | 0       |
| 0       | 0       | 0       | 0 | 0       | 0 | 0        | 0       |
| 0       | 0       | 0       | 0 | 0       | 0 | 0        | 0       |
| 0       | 0       | 0       | 0 | 0       | 0 | 0        | 0       |
| 0       | 0       | 0       | 0 | 0       | 0 | 0        | 0       |
| 0       | 0       | 0       | 0 | 0       | 0 | 0        | 0       |
| 0       | 0       | 0       | 0 | 0       | 0 | 0        | 0       |
| 0       | 0       | 0       | 0 | 0       | 0 | 0        | 0       |
| 0.00203 | 0       | 0       | 0 | 0       | 0 | 0        | 0       |
| 0       | 0       | 0       | 0 | 0       | 0 | 0        | 0       |
| 0.38942 | 0.07268 | 0.03459 | 0 | 0       | 0 | 12.07337 | 7.30099 |
| 0.38942 | 0.07268 | 0.03459 | 0 | 0       | 0 | 12.07337 | 7.30099 |



|         |          |         |         |         |         |         |   |
|---------|----------|---------|---------|---------|---------|---------|---|
| 0       | 0        | 0       | 0       | 0       | 0       | 0       | 0 |
| 0       | 0        | 0       | 0       | 0       | 0       | 0       | 0 |
| 0       | 0        | 0       | 0       | 0       | 0       | 0       | 0 |
| 0.20227 | 12.41257 | 0.12858 | 1.43778 | 0.00014 | 1.40264 | 0       | 0 |
| 0.20227 | 12.41257 | 0.12858 | 1.43778 | 0.00014 | 1.40264 | 0       | 0 |
| 0.09094 | 0.00045  | 0       | 0       | 0       | 0       | 0       | 0 |
| 0       | 0        | 0       | 0.03403 | 0       | 0       | 0       | 0 |
| 0       | 0        | 0       | 0.71841 | 0.00014 | 0       | 0       | 0 |
| 0       | 0.00427  | 0       | 0.13212 | 0       | 0.32828 | 0       | 0 |
| 0       | 0        | 0       | 0       | 0       | 0       | 0       | 0 |
| 0       | 0        | 0       | 0.49894 | 0       | 1.07436 | 0       | 0 |
| 0       | 0        | 0       | 0.0096  | 0       | 0       | 0       | 0 |
| 0       | 0        | 0       | 0.00113 | 0       | 0       | 0       | 0 |
| 0       | 0        | 0       | 0       | 0       | 0       | 0       | 0 |
| 0.11133 | 12.40785 | 0.12858 | 0.04356 | 0       | 0       | 0       | 0 |
| 0       | 0        | 0       | 0       | 0       | 0       | 0       | 0 |
| 0       | 0        | 0       | 0       | 0       | 0       | 0       | 0 |
| 0       | 0        | 0       | 0       | 0       | 0       | 0       | 0 |
| 0       | 0        | 0       | 0       | 0       | 0       | 0       | 0 |
| 0       | 0        | 0       | 0       | 0       | 0       | 0       | 0 |
| 0       | 0        | 0       | 0       | 0       | 0       | 0       | 0 |
| 0       | 0        | 0       | 0       | 0       | 0       | 0       | 0 |
| 0       | 0        | 0       | 0       | 0       | 0       | 0       | 0 |
| 0       | 0        | 0       | 0       | 0       | 0       | 0       | 0 |
| 0       | 0        | 0       | 0       | 0       | 0       | 0       | 0 |
| 0       | 0        | 0       | 0       | 0       | 0       | 0       | 0 |
| 0       | 0        | 0       | 0       | 0       | 0       | 0       | 0 |
| 0       | 0        | 0       | 0       | 0       | 0       | 0       | 0 |
| 0       | 0        | 0       | 0       | 0       | 0       | 0       | 0 |
| 0       | 0        | 0       | 0       | 0       | 0       | 0       | 0 |
| 0       | 0        | 0       | 0       | 0       | 0       | 0       | 0 |
| 0       | 0        | 0       | 0       | 0       | 0       | 0       | 0 |
| 0       | 0        | 0       | 0       | 0       | 0       | 0       | 0 |
| 0       | 0        | 0       | 0       | 0       | 0       | 0       | 0 |
| 0       | 0        | 0       | 0       | 0       | 0       | 0       | 0 |
| 0.00209 | 0        | 0.03991 | 0.11258 | 0.02024 | 0.00466 | 0.05121 | 0 |





|         |          |         |          |   |   |         |         |
|---------|----------|---------|----------|---|---|---------|---------|
| 0       | 0        | 0       | 0        | 0 | 0 | 0       | 0       |
| 0       | 0        | 0       | 0        | 0 | 0 | 0       | 0       |
| 0.17774 | 22.42004 | 1.84555 | 41.88925 | 0 | 0 | 1.34638 | 2.80039 |
| 0       | 0        | 0       | 0        | 0 | 0 | 0       | 0       |
| 0       | 0        | 0       | 0        | 0 | 0 | 0       | 0       |
| 0.11828 | 0.00463  | 1.72936 | 30.77554 | 0 | 0 | 0.89853 | 0       |
| 0       | 0        | 0       | 0        | 0 | 0 | 0       | 0       |
| 0.11828 | 0.00463  | 1.72936 | 28.70884 | 0 | 0 | 0       | 0       |
| 0       | 0        | 0       | 0.00187  | 0 | 0 | 0       | 0       |
| 0       | 0        | 0       | 0.00027  | 0 | 0 | 0       | 0       |
| 0       | 0        | 0       | 0.11097  | 0 | 0 | 0       | 0       |
| 0       | 0        | 0       | 0.34208  | 0 | 0 | 0       | 0       |
| 0       | 0        | 0       | 0.23927  | 0 | 0 | 0       | 0       |
| 0       | 0        | 0       | 1.32707  | 0 | 0 | 0       | 0       |
| 0       | 0        | 0       | 0.04517  | 0 | 0 | 0       | 0       |
| 0       | 0        | 0       | 0        | 0 | 0 | 0.01277 | 0       |
| 0       | 0        | 0       | 0        | 0 | 0 | 0       | 0       |
| 0       | 0        | 0       | 0        | 0 | 0 | 0.88577 | 0       |
| 0       | 0        | 0       | 0        | 0 | 0 | 0       | 0       |
| 0       | 0        | 0       | 0        | 0 | 0 | 0       | 0       |
| 0       | 0        | 0       | 0        | 0 | 0 | 0       | 0       |
| 0.05946 | 22.41541 | 0.09627 | 11.11371 | 0 | 0 | 0.44785 | 2.80039 |
| 0       | 0        | 0       | 0        | 0 | 0 | 0       | 0       |
| 0.05946 | 22.41541 | 0.09627 | 11.11371 | 0 | 0 | 0.44785 | 2.80039 |
| 0       | 0        | 0.01993 | 0        | 0 | 0 | 0       | 0       |
| 0       | 0        | 0.01993 | 0        | 0 | 0 | 0       | 0       |
| 0       | 0.00309  | 0.00303 | 0.00489  | 0 | 0 | 0.00028 | 0       |
| 0       | 0.00309  | 0.00236 | 0.00489  | 0 | 0 | 0       | 0       |
| 0       | 0.00199  | 0       | 0        | 0 | 0 | 0       | 0       |
| 0       | 0        | 0       | 0        | 0 | 0 | 0       | 0       |
| 0       | 0.0011   | 0       | 0        | 0 | 0 | 0       | 0       |
| 0       | 0        | 0.00236 | 0.00489  | 0 | 0 | 0       | 0       |
| 0       | 0        | 0.00068 | 0        | 0 | 0 | 0.00028 | 0       |
| 0       | 0        | 0.00068 | 0        | 0 | 0 | 0.00028 | 0       |
| 0.00116 | 0        | 0       | 0        | 0 | 0 | 0.00358 | 0.00903 |

|         |          |          |          |         |   |         |         |
|---------|----------|----------|----------|---------|---|---------|---------|
| 0.00116 | 0        | 0        | 0        | 0       | 0 | 0       | 0       |
| 0.00116 | 0        | 0        | 0        | 0       | 0 | 0       | 0       |
| 0       | 0        | 0        | 0        | 0       | 0 | 0       | 0       |
| 0       | 0        | 0        | 0        | 0       | 0 | 0       | 0       |
| 0       | 0        | 0        | 0        | 0       | 0 | 0.00358 | 0.00903 |
| 0       | 0        | 0        | 0        | 0       | 0 | 0.00358 | 0.00903 |
| 0       | 0        | 0        | 0        | 0       | 0 | 0       | 0       |
| 0       | 0        | 0        | 0        | 0       | 0 | 0       | 0       |
| 0.22149 | 0.01941  | 0        | 0.00437  | 0       | 0 | 6.30788 | 0.12106 |
| 0       | 0        | 0        | 0        | 0       | 0 | 0       | 0       |
| 0       | 0        | 0        | 0        | 0       | 0 | 0       | 0       |
| 0       | 0        | 0        | 0        | 0       | 0 | 0       | 0       |
| 0       | 0        | 0        | 0        | 0       | 0 | 0       | 0       |
| 0.22149 | 0.01941  | 0        | 0        | 0       | 0 | 6.30788 | 0.12106 |
| 0       | 0        | 0        | 0        | 0       | 0 | 0       | 0       |
| 0       | 0        | 0        | 0        | 0       | 0 | 0       | 0       |
| 0       | 0        | 0        | 0        | 0       | 0 | 0       | 0       |
| 0.02826 | 0        | 0        | 0        | 0       | 0 | 0.00712 | 0       |
| 0       | 0.01941  | 0        | 0        | 0       | 0 | 0.00395 | 0       |
| 0.19323 | 0        | 0        | 0        | 0       | 0 | 0.0548  | 0       |
| 0       | 0        | 0        | 0        | 0       | 0 | 5.92146 | 0.12106 |
| 0       | 0        | 0        | 0        | 0       | 0 | 0.32055 | 0       |
| 0       | 0        | 0        | 0        | 0       | 0 | 0       | 0       |
| 0       | 0        | 0        | 0        | 0       | 0 | 0       | 0       |
| 0       | 0        | 0        | 0        | 0       | 0 | 0       | 0       |
| 0       | 0        | 0        | 0        | 0       | 0 | 0       | 0       |
| 0       | 0        | 0        | 0.00437  | 0       | 0 | 0       | 0       |
| 0       | 0        | 0        | 0.00437  | 0       | 0 | 0       | 0       |
| 8.47392 | 32.14355 | 20.63938 | 17.07347 | 0.00927 | 0 | 7.46422 | 4.19239 |
| 0.44746 | 0.14789  | 4.18688  | 0        | 0       | 0 | 0.00779 | 0       |
| 0       | 0        | 0        | 0        | 0       | 0 | 0       | 0       |
| 0.44746 | 0.14789  | 4.18688  | 0        | 0       | 0 | 0.00779 | 0       |
| 0.05492 | 0        | 0        | 0.99974  | 0       | 0 | 0.42632 | 0       |
| 0.05492 | 0        | 0        | 0.99974  | 0       | 0 | 0.42632 | 0       |
| 0.23728 | 0.0089   | 10.0259  | 0.064    | 0       | 0 | 1.74203 | 0.78275 |

|         |          |         |          |         |   |         |         |
|---------|----------|---------|----------|---------|---|---------|---------|
| 0       | 0.00615  | 0.00453 | 0        | 0       | 0 | 0       | 0       |
| 0       | 0        | 0       | 0        | 0       | 0 | 0.10661 | 0       |
| 0.01607 | 0        | 0.00005 | 0        | 0       | 0 | 0       | 0       |
| 0.04996 | 0        | 0.04224 | 0        | 0       | 0 | 0.03194 | 0       |
| 0       | 0        | 0       | 0.064    | 0       | 0 | 0       | 0       |
| 0       | 0        | 0       | 0        | 0       | 0 | 0.11168 | 0.23447 |
| 0.04533 | 0        | 0.46966 | 0        | 0       | 0 | 0.05589 | 0       |
| 0.12591 | 0.00275  | 9.50942 | 0        | 0       | 0 | 0.96578 | 0.54828 |
| 0       | 0        | 0       | 0        | 0       | 0 | 0.47012 | 0       |
| 0       | 0        | 0       | 0        | 0       | 0 | 0       | 0       |
| 0       | 0        | 0       | 0        | 0       | 0 | 0       | 0       |
| 0       | 0        | 0       | 0        | 0       | 0 | 0       | 0       |
| 0       | 0        | 0       | 0        | 0       | 0 | 0       | 0       |
| 0       | 0        | 0       | 0        | 0       | 0 | 0       | 0       |
| 0       | 0        | 0       | 0        | 0       | 0 | 0.07931 | 0       |
| 0       | 0        | 0       | 0        | 0       | 0 | 0.0315  | 0       |
| 0       | 0        | 0       | 0        | 0       | 0 | 0.04782 | 0       |
| 0       | 0        | 0       | 0        | 0       | 0 | 0       | 0       |
| 0       | 0        | 0       | 0        | 0       | 0 | 0.19742 | 0.00052 |
| 0       | 0        | 0       | 0        | 0       | 0 | 0       | 0       |
| 0       | 0        | 0       | 0        | 0       | 0 | 0.19742 | 0.00052 |
| 0.0037  | 0.01829  | 0.00519 | 0        | 0       | 0 | 0       | 0       |
| 0.0037  | 0.01829  | 0.00519 | 0        | 0       | 0 | 0       | 0       |
| 0       | 0        | 0       | 0.00535  | 0       | 0 | 0.20673 | 0       |
| 0       | 0        | 0       | 0.00535  | 0       | 0 | 0.20673 | 0       |
| 0       | 0        | 0       | 0        | 0       | 0 | 0       | 0       |
| 0       | 0        | 0       | 0        | 0       | 0 | 0       | 0       |
| 1.14777 | 29.87503 | 6.41677 | 16.00437 | 0.00927 | 0 | 1.57577 | 3.03385 |
| 0.03817 | 0.09582  | 0.11141 | 2.81995  | 0       | 0 | 0.03303 | 0.00737 |
| 0       | 0        | 0       | 0        | 0       | 0 | 0.00491 | 0.00094 |
| 0.28157 | 17.3207  | 3.7149  | 0.09437  | 0       | 0 | 0.9214  | 0.12779 |
| 0.13066 | 0.05566  | 0.12338 | 0.96789  | 0       | 0 | 0.0983  | 2.73122 |
| 0.30938 | 0.60487  | 1.04529 | 0        | 0       | 0 | 0.00412 | 0.10547 |
| 0       | 0        | 0       | 0        | 0       | 0 | 0       | 0       |
| 0.04261 | 0.00522  | 0.1579  | 0        | 0       | 0 | 0.00758 | 0.00078 |

|         |          |         |          |         |   |         |         |
|---------|----------|---------|----------|---------|---|---------|---------|
| 0       | 0        | 0       | 0        | 0       | 0 | 0       | 0       |
| 0.01146 | 0        | 0.01958 | 0        | 0       | 0 | 0       | 0       |
| 0.33392 | 11.79276 | 1.24431 | 12.12216 | 0.00927 | 0 | 0.50642 | 0.06028 |
| 0       | 0        | 0       | 0        | 0       | 0 | 0       | 0       |
| 0       | 0        | 0       | 0        | 0       | 0 | 0       | 0       |
| 0       | 0        | 0       | 0        | 0       | 0 | 0.50692 | 0.00046 |
| 1.26824 | 0.0005   | 0       | 0        | 0       | 0 | 2.26225 | 0.27686 |
| 1.26824 | 0.0005   | 0       | 0        | 0       | 0 | 0       | 0       |
| 0       | 0        | 0       | 0        | 0       | 0 | 2.26225 | 0.27686 |
| 0       | 0        | 0       | 0        | 0       | 0 | 0       | 0       |
| 0       | 0        | 0       | 0        | 0       | 0 | 0.50692 | 0.00046 |
| 0       | 0        | 0       | 0        | 0       | 0 | 0       | 0       |
| 0       | 0        | 0       | 0        | 0       | 0 | 0       | 0       |
| 0       | 0        | 0       | 0        | 0       | 0 | 0       | 0       |
| 0       | 0        | 0.00072 | 0        | 0       | 0 | 0       | 0       |
| 0       | 0        | 0       | 0        | 0       | 0 | 0       | 0       |
| 0       | 0        | 0.00072 | 0        | 0       | 0 | 0       | 0       |
| 0       | 0.33162  | 0       | 0        | 0       | 0 | 0       | 0       |
| 0       | 0.33162  | 0       | 0        | 0       | 0 | 0       | 0       |
| 5.29721 | 0        | 0       | 0        | 0       | 0 | 0.39599 | 0.04568 |
| 0       | 0        | 0       | 0        | 0       | 0 | 0.08257 | 0       |
| 0       | 0        | 0       | 0        | 0       | 0 | 0       | 0       |
| 0       | 0        | 0       | 0        | 0       | 0 | 0.02885 | 0       |
| 5.29721 | 0        | 0       | 0        | 0       | 0 | 0.26636 | 0.01609 |
| 0       | 0        | 0       | 0        | 0       | 0 | 0       | 0       |
| 0       | 0        | 0       | 0        | 0       | 0 | 0.0182  | 0.02959 |
| 0.01734 | 1.76133  | 0.00392 | 0        | 0       | 0 | 0.02884 | 0.03532 |
| 0.01734 | 1.76133  | 0.00392 | 0        | 0       | 0 | 0.02884 | 0.03532 |
| 0       | 0        | 0       | 0        | 0       | 0 | 0       | 0       |
| 0       | 0        | 0       | 0        | 0       | 0 | 0       | 0       |
| 0       | 0        | 0       | 0        | 0       | 0 | 0       | 0       |
| 0       | 0        | 0       | 0        | 0       | 0 | 0       | 0       |
| 0       | 0        | 0       | 0        | 0       | 0 | 0.03486 | 0.01696 |
| 0       | 0        | 0       | 0        | 0       | 0 | 0.03486 | 0.01696 |

|         |         |         |         |   |   |         |         |
|---------|---------|---------|---------|---|---|---------|---------|
| 0       | 0       | 0       | 0       | 0 | 0 | 0       | 0       |
| 0       | 0       | 0       | 0       | 0 | 0 | 0       | 0       |
| 0       | 0       | 0       | 0       | 0 | 0 | 0       | 0       |
| 0       | 0       | 0       | 0       | 0 | 0 | 0       | 0       |
| 0.06362 | 8.37068 | 1.03407 | 0.11952 | 0 | 0 | 0.07635 | 0.0259  |
| 0.06362 | 8.36993 | 1.03407 | 0       | 0 | 0 | 0       | 0.00809 |
| 0.06362 | 8.36993 | 1.03407 | 0       | 0 | 0 | 0       | 0.00809 |
| 0       | 0.00075 | 0       | 0       | 0 | 0 | 0       | 0       |
| 0       | 0.00075 | 0       | 0       | 0 | 0 | 0       | 0       |
| 0       | 0       | 0       | 0.11921 | 0 | 0 | 0.06774 | 0.0178  |
| 0       | 0       | 0       | 0.11921 | 0 | 0 | 0.06774 | 0.0178  |
| 0       | 0       | 0       | 0       | 0 | 0 | 0       | 0       |
| 0       | 0       | 0       | 0       | 0 | 0 | 0       | 0       |
| 0       | 0       | 0       | 0       | 0 | 0 | 0       | 0       |
| 0       | 0       | 0       | 0       | 0 | 0 | 0       | 0       |
| 0       | 0       | 0       | 0       | 0 | 0 | 0.0086  | 0       |
| 0       | 0       | 0       | 0       | 0 | 0 | 0.00362 | 0       |
| 0       | 0       | 0       | 0       | 0 | 0 | 0.00498 | 0       |
| 0       | 0       | 0       | 0.00032 | 0 | 0 | 0       | 0       |
| 0       | 0       | 0       | 0.00032 | 0 | 0 | 0       | 0       |
| 0       | 0       | 0       | 0       | 0 | 0 | 0       | 0       |
| 0       | 0       | 0       | 0       | 0 | 0 | 0       | 0       |
| 4.38423 | 1.3123  | 1.08631 | 1.03062 | 0 | 0 | 8.94836 | 0.66513 |
| 0.06259 | 0       | 0       | 0       | 0 | 0 | 0.0007  | 0       |
| 0.06259 | 0       | 0       | 0       | 0 | 0 | 0.0007  | 0       |
| 0       | 0       | 0       | 0       | 0 | 0 | 0       | 0       |
| 0       | 0       | 0       | 0       | 0 | 0 | 0       | 0       |
| 0       | 0       | 0       | 0       | 0 | 0 | 0       | 0       |
| 0       | 0       | 0       | 0       | 0 | 0 | 0       | 0       |
| 0.02199 | 0       | 0       | 0.0559  | 0 | 0 | 0.37939 | 0.04612 |
| 0.02199 | 0       | 0       | 0.0559  | 0 | 0 | 0.37939 | 0.04612 |
| 2.99918 | 0.19946 | 0.00815 | 0       | 0 | 0 | 5.63693 | 0.06253 |
| 2.99918 | 0.19946 | 0.00815 | 0       | 0 | 0 | 5.63693 | 0.06253 |
| 1.16994 | 1.0094  | 0.86538 | 0.2049  | 0 | 0 | 1.81078 | 0.48496 |
| 1.16994 | 1.0094  | 0.86538 | 0.2049  | 0 | 0 | 1.81078 | 0.48496 |

|         |         |         |         |         |   |         |         |
|---------|---------|---------|---------|---------|---|---------|---------|
| 0       | 0       | 0       | 0       | 0       | 0 | 0       | 0       |
| 0       | 0       | 0       | 0       | 0       | 0 | 0.0641  | 0       |
| 0       | 0       | 0       | 0       | 0       | 0 | 0.0641  | 0       |
| 0       | 0       | 0       | 0       | 0       | 0 | 0       | 0       |
| 0       | 0       | 0       | 0       | 0       | 0 | 0       | 0       |
| 0       | 0       | 0       | 0       | 0       | 0 | 0       | 0       |
| 0       | 0       | 0       | 0       | 0       | 0 | 0       | 0       |
| 0       | 0       | 0       | 0       | 0       | 0 | 0       | 0       |
| 0       | 0       | 0.0002  | 0.15538 | 0       | 0 | 0.0063  | 0.03959 |
| 0       | 0       | 0.0002  | 0.15538 | 0       | 0 | 0.00252 | 0       |
| 0       | 0       | 0       | 0       | 0       | 0 | 0       | 0       |
| 0       | 0       | 0       | 0       | 0       | 0 | 0       | 0       |
| 0       | 0       | 0       | 0       | 0       | 0 | 0.00378 | 0.03959 |
| 0       | 0       | 0       | 0       | 0       | 0 | 0       | 0       |
| 0.03215 | 0       | 0       | 0       | 0       | 0 | 0       | 0.00175 |
| 0       | 0       | 0       | 0       | 0       | 0 | 0       | 0       |
| 0.03215 | 0       | 0       | 0       | 0       | 0 | 0       | 0.00175 |
| 0       | 0       | 0       | 0       | 0       | 0 | 0       | 0       |
| 0       | 0       | 0       | 0       | 0       | 0 | 0       | 0       |
| 0       | 0       | 0       | 0       | 0       | 0 | 0       | 0       |
| 0.09837 | 0.10344 | 0.21258 | 0.61444 | 0       | 0 | 1.05016 | 0.0302  |
| 0.09837 | 0.10344 | 0.21258 | 0.61444 | 0       | 0 | 1.05016 | 0.0302  |
| 0.25543 | 7.10281 | 0.72572 | 8.38394 | 0.00031 | 0 | 0.39679 | 0.44733 |
| 0.25543 | 7.10281 | 0.72572 | 8.38394 | 0.00031 | 0 | 0.39679 | 0.44733 |
| 0.25543 | 7.10281 | 0.72572 | 8.38394 | 0.00031 | 0 | 0.39679 | 0.44733 |
| 0       | 0       | 0       | 0       | 0       | 0 | 0       | 0       |
| 0       | 0       | 0       | 0       | 0       | 0 | 0       | 0       |
| 0       | 0       | 0       | 0       | 0       | 0 | 0       | 0       |
| 0       | 0       | 0       | 0       | 0       | 0 | 0       | 0       |
| 0       | 0       | 0       | 0       | 0       | 0 | 0       | 0       |
| 0       | 0       | 0       | 0       | 0       | 0 | 0       | 0       |
| 0       | 0       | 0       | 0       | 0       | 0 | 0       | 0       |
| 0       | 0       | 0.00034 | 0       | 0       | 0 | 0.12358 | 0       |
| 0       | 0       | 0.00034 | 0       | 0       | 0 | 0.12358 | 0       |
| 0       | 0       | 0       | 0       | 0       | 0 | 0.01503 | 0.04906 |
| 0       | 0       | 0       | 0       | 0       | 0 | 0.01503 | 0.04906 |

|         |         |         |         |         |   |         |         |
|---------|---------|---------|---------|---------|---|---------|---------|
| 0       | 0       | 0       | 0       | 0       | 0 | 0       | 0       |
| 0       | 0       | 0       | 0       | 0       | 0 | 0       | 0       |
| 0.25543 | 7.10281 | 0.72539 | 8.36155 | 0.00021 | 0 | 0.1364  | 0.39828 |
| 0.02042 | 6.46378 | 0.0406  | 4.39536 | 0       | 0 | 0.10635 | 0.29158 |
| 0       | 0       | 0       | 0       | 0       | 0 | 0       | 0       |
| 0.23501 | 0.63903 | 0.68479 | 3.96619 | 0.00021 | 0 | 0.03005 | 0.1067  |
| 0       | 0       | 0       | 0       | 0       | 0 | 0       | 0       |
| 0       | 0       | 0       | 0       | 0       | 0 | 0       | 0       |
| 0       | 0       | 0       | 0       | 0       | 0 | 0       | 0       |
| 0       | 0       | 0       | 0       | 0       | 0 | 0       | 0       |
| 0       | 0       | 0       | 0       | 0       | 0 | 0       | 0       |
| 0       | 0       | 0       | 0       | 0       | 0 | 0       | 0       |
| 0       | 0       | 0       | 0       | 0       | 0 | 0.12178 | 0       |
| 0       | 0       | 0       | 0       | 0       | 0 | 0.12178 | 0       |
| 0       | 0       | 0       | 0       | 0       | 0 | 0       | 0       |
| 0       | 0       | 0       | 0       | 0       | 0 | 0       | 0       |
| 0       | 0       | 0       | 0       | 0       | 0 | 0       | 0       |
| 0       | 0       | 0       | 0       | 0       | 0 | 0       | 0       |
| 0       | 0       | 0       | 0.00013 | 0       | 0 | 0       | 0       |
| 0       | 0       | 0       | 0.00013 | 0       | 0 | 0       | 0       |
| 0       | 0       | 0       | 0.02226 | 0.0001  | 0 | 0       | 0       |
| 0       | 0       | 0       | 0.02226 | 0.0001  | 0 | 0       | 0       |
| 0       | 0.00855 | 0       | 0       | 0       | 0 | 0.01222 | 0       |
| 0       | 0.00855 | 0       | 0       | 0       | 0 | 0.01222 | 0       |
| 0       | 0.00855 | 0       | 0       | 0       | 0 | 0.01222 | 0       |
| 0       | 0.00855 | 0       | 0       | 0       | 0 | 0.01222 | 0       |
| 0       | 0       | 0       | 0       | 0       | 0 | 0       | 0       |
| 0       | 0       | 0       | 0       | 0       | 0 | 0       | 0       |
| 0       | 0       | 0       | 0       | 0       | 0 | 0       | 0       |
| 0       | 0       | 0       | 0       | 0       | 0 | 0       | 0       |
| 0       | 0       | 0       | 0       | 0       | 0 | 0       | 0       |
| 0       | 0       | 0       | 0       | 0       | 0 | 0       | 0       |
| 0       | 0       | 0       | 0       | 0       | 0 | 0.01222 | 0       |
| 0       | 0.00855 | 0       | 0       | 0       | 0 | 0       | 0       |
| 0       | 0       | 0       | 0       | 0       | 0 | 0       | 0       |
| 0.45907 | 0.59579 | 10.9563 | 1.91668 | 0       | 0 | 3.07912 | 1.07055 |

|         |         |          |         |   |   |         |         |
|---------|---------|----------|---------|---|---|---------|---------|
| 0.44929 | 0.59579 | 10.94979 | 0       | 0 | 0 | 2.19439 | 0.92301 |
| 0.44929 | 0.59579 | 10.94979 | 0       | 0 | 0 | 2.19439 | 0.92301 |
| 0       | 0       | 0        | 0       | 0 | 0 | 0.07398 | 0.14641 |
| 0       | 0       | 0        | 0       | 0 | 0 | 0.07398 | 0.14641 |
| 0       | 0       | 0        | 0       | 0 | 0 | 0       | 0       |
| 0.44929 | 0.59579 | 10.94979 | 0       | 0 | 0 | 2.12041 | 0.7766  |
| 0.44929 | 0.59579 | 10.94979 | 0       | 0 | 0 | 2.12041 | 0.7766  |
| 0       | 0       | 0        | 0       | 0 | 0 | 0       | 0       |
| 0       | 0       | 0        | 0       | 0 | 0 | 0.81334 | 0.00221 |
| 0       | 0       | 0        | 0       | 0 | 0 | 0.81334 | 0.00221 |
| 0       | 0       | 0        | 0       | 0 | 0 | 0.81334 | 0.00221 |
| 0       | 0       | 0        | 0       | 0 | 0 | 0.5858  | 0.00221 |
| 0       | 0       | 0        | 0       | 0 | 0 | 0.22754 | 0       |
| 0       | 0       | 0        | 0       | 0 | 0 | 0       | 0       |
| 0       | 0       | 0        | 0       | 0 | 0 | 0       | 0       |
| 0       | 0       | 0        | 0       | 0 | 0 | 0       | 0       |
| 0       | 0       | 0        | 0       | 0 | 0 | 0       | 0       |
| 0       | 0       | 0        | 0       | 0 | 0 | 0       | 0       |
| 0       | 0       | 0        | 0       | 0 | 0 | 0       | 0       |
| 0       | 0       | 0        | 0       | 0 | 0 | 0       | 0       |
| 0.00978 | 0       | 0.00651  | 1.91668 | 0 | 0 | 0.07139 | 0.14533 |
| 0.00978 | 0       | 0.00651  | 1.91668 | 0 | 0 | 0.07139 | 0.14533 |
| 0       | 0       | 0        | 0       | 0 | 0 | 0       | 0       |
| 0       | 0       | 0        | 0       | 0 | 0 | 0       | 0       |
| 0       | 0       | 0        | 0.00509 | 0 | 0 | 0.00017 | 0       |
| 0       | 0       | 0        | 0.00509 | 0 | 0 | 0.00017 | 0       |
| 0       | 0       | 0        | 0       | 0 | 0 | 0       | 0       |
| 0       | 0       | 0        | 0       | 0 | 0 | 0       | 0       |
| 0       | 0       | 0        | 0       | 0 | 0 | 0       | 0       |
| 0       | 0       | 0        | 0       | 0 | 0 | 0       | 0       |
| 0       | 0       | 0.00038  | 0       | 0 | 0 | 0.01642 | 0.01343 |
| 0       | 0       | 0        | 0       | 0 | 0 | 0       | 0       |
| 0       | 0       | 0        | 0       | 0 | 0 | 0       | 0       |
| 0       | 0       | 0.00038  | 0       | 0 | 0 | 0.01642 | 0.01343 |
| 0       | 0       | 0        | 0       | 0 | 0 | 0       | 0       |



|         |          |         |         |         |   |         |         |
|---------|----------|---------|---------|---------|---|---------|---------|
| 0       | 0        | 0       | 0       | 0       | 0 | 0       | 0       |
| 0.00978 | 0        | 0.00613 | 1.91159 | 0       | 0 | 0.05479 | 0.1319  |
| 0.00013 | 0        | 0       | 0.14995 | 0       | 0 | 0.00616 | 0       |
| 0       | 0        | 0       | 0.006   | 0       | 0 | 0       | 0       |
| 0       | 0        | 0       | 0.00118 | 0       | 0 | 0       | 0       |
| 0.00965 | 0        | 0.00613 | 1.75446 | 0       | 0 | 0.04864 | 0.1319  |
| 0       | 0        | 0       | 0       | 0       | 0 | 0       | 0       |
| 0       | 0        | 0       | 0       | 0       | 0 | 0       | 0       |
| 0       | 0        | 0       | 0       | 0       | 0 | 0       | 0       |
| 0       | 0        | 0       | 0       | 0       | 0 | 0       | 0       |
| 0       | 0.00256  | 0.00128 | 0.0178  | 0.01062 | 0 | 0.00049 | 0       |
| 0       | 0.00256  | 0.00128 | 0.0178  | 0.01062 | 0 | 0.00049 | 0       |
| 0       | 0.00256  | 0.00128 | 0.0178  | 0.01062 | 0 | 0.00049 | 0       |
| 0       | 0        | 0       | 0       | 0       | 0 | 0       | 0       |
| 0       | 0        | 0       | 0       | 0       | 0 | 0       | 0       |
| 0       | 0        | 0       | 0       | 0       | 0 | 0       | 0       |
| 0       | 0        | 0       | 0       | 0       | 0 | 0       | 0       |
| 0       | 0        | 0       | 0       | 0       | 0 | 0       | 0       |
| 0       | 0.00256  | 0.00128 | 0.0178  | 0.01062 | 0 | 0.00049 | 0       |
| 0       | 0.00256  | 0.00128 | 0.0178  | 0.01062 | 0 | 0.00049 | 0       |
| 0       | 0        | 0       | 0       | 0       | 0 | 0       | 0       |
| 0       | 0        | 0       | 0       | 0       | 0 | 0       | 0       |
| 0       | 0        | 0       | 0       | 0       | 0 | 0       | 0       |
| 0       | 0        | 0       | 0       | 0       | 0 | 0       | 0       |
| 0       | 0        | 0       | 0       | 0       | 0 | 0       | 0       |
| 0       | 0        | 0       | 0       | 0       | 0 | 0       | 0       |
| 1.35567 | 10.20572 | 3.68068 | 8.86625 | 0       | 0 | 0.59769 | 0.28493 |
| 1.35567 | 10.20572 | 3.68068 | 8.86625 | 0       | 0 | 0.59769 | 0.28493 |
| 1.35567 | 10.20572 | 3.68068 | 8.86625 | 0       | 0 | 0.59769 | 0.28493 |
| 1.35567 | 10.20572 | 3.68068 | 8.86625 | 0       | 0 | 0.59769 | 0.28493 |
| 0       | 0        | 0       | 0       | 0       | 0 | 0       | 0       |
| 0       | 0        | 0       | 0       | 0       | 0 | 0       | 0       |
| 1.35567 | 10.20572 | 3.68068 | 8.86625 | 0       | 0 | 0.59769 | 0.28493 |
| 0       | 0        | 0       | 0       | 0       | 0 | 0       | 0       |
| 1.33932 | 10.06535 | 0.45348 | 1.71224 | 0       | 0 | 0       | 0       |
| 0       | 0        | 0       | 0       | 0       | 0 | 0       | 0       |

|          |         |          |          |          |          |         |         |
|----------|---------|----------|----------|----------|----------|---------|---------|
| 0        | 0       | 0        | 0.00254  | 0        | 0        | 0       | 0       |
| 0        | 0       | 0        | 0        | 0        | 0        | 0       | 0       |
| 0        | 0       | 0        | 0        | 0        | 0        | 0       | 0       |
| 0        | 0       | 0        | 0        | 0        | 0        | 0.0039  | 0.00384 |
| 0.01635  | 0.14037 | 3.2272   | 7.15148  | 0        | 0        | 0.59379 | 0.2811  |
| 0        | 0       | 0        | 0        | 0        | 0        | 0       | 0       |
| 0        | 0       | 0        | 0        | 0        | 0        | 0       | 0       |
| 0        | 0       | 0        | 0        | 0        | 0        | 0       | 0       |
| 0        | 0       | 0        | 0        | 0        | 0        | 0       | 0       |
| 0        | 0       | 0        | 0        | 0        | 0        | 0       | 0       |
| 0        | 0       | 0        | 0        | 0        | 0        | 0       | 0       |
| 0        | 0       | 0        | 0        | 0        | 0        | 0       | 0       |
| 0        | 0       | 0        | 0        | 0        | 0        | 0       | 0       |
| 0        | 0       | 0        | 0        | 0        | 0        | 0       | 0       |
| 0        | 0       | 0        | 0        | 0        | 0        | 0       | 0       |
| 0        | 0       | 0        | 0        | 0        | 0        | 0       | 0       |
| 0        | 0       | 0        | 0        | 0        | 0        | 0       | 0       |
| 0        | 0       | 0        | 0        | 0        | 0        | 0       | 0       |
| 0        | 0       | 0        | 0        | 0        | 0        | 0       | 0       |
| 0        | 0       | 0        | 0        | 0        | 0        | 0       | 0       |
| 0        | 0       | 0        | 0        | 0        | 0        | 0       | 0       |
| 0        | 0       | 0        | 0        | 0        | 0        | 0       | 0       |
| 25.18203 | 1.51445 | 34.37168 | 18.47656 | 98.57792 | 98.57393 | 7.82927 | 69.6242 |
| 0        | 0       | 0        | 0        | 0.00106  | 0        | 0.08961 | 0.15545 |
| 0        | 0       | 0        | 0        | 0        | 0        | 0.07859 | 0.14647 |
| 0        | 0       | 0        | 0        | 0        | 0        | 0       | 0.10505 |
| 0        | 0       | 0        | 0        | 0        | 0        | 0       | 0.10505 |
| 0        | 0       | 0        | 0        | 0        | 0        | 0       | 0.10505 |
| 0        | 0       | 0        | 0        | 0        | 0        | 0       | 0       |
| 0        | 0       | 0        | 0        | 0        | 0        | 0       | 0       |
| 0        | 0       | 0        | 0        | 0        | 0        | 0       | 0       |
| 0        | 0       | 0        | 0        | 0        | 0        | 0       | 0       |
| 0        | 0       | 0        | 0        | 0        | 0        | 0       | 0       |
| 0        | 0       | 0        | 0        | 0        | 0        | 0.07859 | 0.04143 |
| 0        | 0       | 0        | 0        | 0        | 0        | 0       | 0       |
| 0        | 0       | 0        | 0        | 0        | 0        | 0       | 0       |
| 0        | 0       | 0        | 0        | 0        | 0        | 0.07859 | 0.04143 |
| 0        | 0       | 0        | 0        | 0        | 0        | 0.07859 | 0.04143 |

|          |         |          |          |          |          |         |         |
|----------|---------|----------|----------|----------|----------|---------|---------|
| 0        | 0       | 0        | 0        | 0        | 0        | 0       | 0       |
| 0        | 0       | 0        | 0        | 0        | 0        | 0       | 0       |
| 0        | 0       | 0        | 0        | 0.00106  | 0        | 0.01102 | 0.00898 |
| 0        | 0       | 0        | 0        | 0.00106  | 0        | 0.01102 | 0.00898 |
| 0        | 0       | 0        | 0        | 0        | 0        | 0       | 0       |
| 0        | 0       | 0        | 0        | 0        | 0        | 0       | 0       |
| 0        | 0       | 0        | 0        | 0.00106  | 0        | 0.01102 | 0.00898 |
| 0        | 0       | 0        | 0        | 0        | 0        | 0       | 0.00898 |
| 0        | 0       | 0        | 0        | 0        | 0        | 0.0077  | 0       |
| 0        | 0       | 0        | 0        | 0        | 0        | 0.00332 | 0       |
| 0        | 0       | 0        | 0        | 0        | 0        | 0       | 0       |
| 0        | 0       | 0        | 0        | 0.00106  | 0        | 0       | 0       |
| 0.40531  | 0       | 0.48485  | 0        | 0        | 0        | 0.13146 | 0.07055 |
| 0.40531  | 0       | 0.48485  | 0        | 0        | 0        | 0.13146 | 0.07055 |
| 0.40531  | 0       | 0.48485  | 0        | 0        | 0        | 0.13146 | 0.07055 |
| 0.2026   | 0       | 0.36107  | 0        | 0        | 0        | 0.13146 | 0.07055 |
| 0.2026   | 0       | 0.36107  | 0        | 0        | 0        | 0.13146 | 0.07055 |
| 0.20271  | 0       | 0.12378  | 0        | 0        | 0        | 0       | 0       |
| 0        | 0       | 0        | 0        | 0        | 0        | 0       | 0       |
| 0.20271  | 0       | 0.12378  | 0        | 0        | 0        | 0       | 0       |
| 0        | 0       | 0        | 0        | 0        | 0        | 0.002   | 0.00561 |
| 0        | 0       | 0        | 0        | 0        | 0        | 0.002   | 0.00561 |
| 0        | 0       | 0        | 0        | 0        | 0        | 0       | 0.00561 |
| 0        | 0       | 0        | 0        | 0        | 0        | 0       | 0.00561 |
| 0        | 0       | 0        | 0        | 0        | 0        | 0       | 0       |
| 0        | 0       | 0        | 0        | 0        | 0        | 0       | 0.00561 |
| 0        | 0       | 0        | 0        | 0        | 0        | 0       | 0       |
| 0        | 0       | 0        | 0        | 0        | 0        | 0       | 0       |
| 0        | 0       | 0        | 0        | 0        | 0        | 0       | 0       |
| 0        | 0       | 0        | 0        | 0        | 0        | 0       | 0       |
| 0        | 0       | 0        | 0        | 0        | 0        | 0.002   | 0       |
| 0        | 0       | 0        | 0        | 0        | 0        | 0.002   | 0       |
| 0        | 0       | 0        | 0        | 0        | 0        | 0.002   | 0       |
| 24.77672 | 1.51445 | 33.88683 | 18.47656 | 98.57686 | 98.57393 | 7.6062  | 69.3926 |
| 0        | 0       | 0.00889  | 0        | 0        | 0        | 0       | 0       |



|          |         |          |          |          |          |         |          |
|----------|---------|----------|----------|----------|----------|---------|----------|
| 0        | 0       | 0        | 0        | 0        | 0        | 0       | 0        |
| 24.77672 | 1.51445 | 33.87794 | 3.72891  | 98.57686 | 89.16344 | 0.06346 | 0.01602  |
| 24.77672 | 1.51445 | 33.87794 | 3.72891  | 98.57686 | 89.16344 | 0.06346 | 0.01602  |
| 0        | 0       | 0        | 0        | 0        | 0        | 0       | 0        |
| 0        | 0       | 0        | 14.53954 | 0        | 9.41049  | 7.52901 | 69.37576 |
| 0        | 0       | 0        | 0        | 0        | 0        | 0       | 0        |
| 0        | 0       | 0        | 0.10538  | 0        | 0        | 0       | 0        |
| 0        | 0       | 0        | 0.00693  | 0        | 0        | 0       | 0        |
| 0        | 0       | 0        | 8.02497  | 0        | 7.84947  | 3.25424 | 29.34829 |
| 0        | 0       | 0        | 4.61741  | 0        | 1.03648  | 3.79767 | 36.0341  |
| 0        | 0       | 0        | 1.78484  | 0        | 0.52454  | 0.47709 | 3.99337  |
| 0        | 0       | 0        | 0.03628  | 0        | 0        | 0       | 0        |
| 0        | 0       | 0        | 0.03628  | 0        | 0        | 0       | 0        |
| 0        | 0       | 0        | 0        | 0        | 0        | 0.00216 | 0        |
| 0        | 0       | 0        | 0        | 0        | 0        | 0.00216 | 0        |
| 0        | 0       | 0        | 0        | 0        | 0        | 0       | 0        |
| 0        | 0       | 0        | 0        | 0        | 0        | 0       | 0        |
| 0        | 0       | 0        | 0.07312  | 0        | 0        | 0       | 0        |
| 0        | 0       | 0        | 0.07312  | 0        | 0        | 0       | 0        |
| 0        | 0       | 0        | 0        | 0        | 0        | 0       | 0        |
| 0        | 0       | 0        | 0        | 0        | 0        | 0       | 0        |
| 0        | 0       | 0        | 0        | 0        | 0        | 0       | 0        |
| 0        | 0       | 0        | 0.02997  | 0        | 0        | 0       | 0        |
| 0        | 0       | 0        | 0        | 0        | 0        | 0       | 0        |
| 0        | 0       | 0        | 0        | 0        | 0        | 0       | 0        |
| 0        | 0       | 0        | 0.02997  | 0        | 0        | 0       | 0        |
| 0        | 0       | 0        | 0.02997  | 0        | 0        | 0       | 0        |
| 0        | 0       | 0        | 0.03897  | 0        | 0        | 0.01157 | 0        |
| 0        | 0       | 0        | 0.03897  | 0        | 0        | 0.01157 | 0        |
| 0        | 0       | 0        | 0.00925  | 0        | 0        | 0       | 0        |
| 0        | 0       | 0        | 0.00925  | 0        | 0        | 0       | 0        |
| 0        | 0       | 0        | 0        | 0        | 0        | 0       | 0        |
| 0        | 0       | 0        | 0.02972  | 0        | 0        | 0.01157 | 0        |
| 0        | 0       | 0        | 0        | 0        | 0        | 0       | 0        |
| 0        | 0       | 0        | 0        | 0        | 0        | 0       | 0        |





| AP005_3 | AP006_1 | AP006_2 | AP006_3 | AP007_1  | AP007_2  | AP007_3 | AP008_1 |
|---------|---------|---------|---------|----------|----------|---------|---------|
| 100     | 100     | 100     | 100     | 99.03864 | 99.91704 | 99.9474 | 100     |
| 0.26567 | 0.49368 | 0.49153 | 0.03687 | 2.33668  | 0.0757   | 0.52405 | 0.40952 |
| 0.10747 | 0.47382 | 0.23458 | 0.03034 | 2.21901  | 0.057    | 0.48283 | 0.37363 |
| 0.10368 | 0.0018  | 0.00306 | 0       | 0.00103  | 0.00814  | 0.02919 | 0.20644 |
| 0.10368 | 0.0018  | 0.00306 | 0       | 0.00103  | 0.00814  | 0.02919 | 0.20644 |
| 0       | 0       | 0       | 0       | 0        | 0        | 0       | 0       |
| 0       | 0       | 0       | 0       | 0        | 0        | 0       | 0       |
| 0.10368 | 0.0018  | 0.00306 | 0       | 0.00103  | 0.00814  | 0.02919 | 0.20644 |
| 0       | 0       | 0       | 0       | 0        | 0        | 0       | 0       |
| 0       | 0       | 0       | 0       | 0        | 0.00306  | 0.00694 | 0.01974 |
| 0       | 0       | 0       | 0       | 0        | 0        | 0       | 0       |
| 0       | 0       | 0       | 0       | 0        | 0        | 0       | 0       |
| 0       | 0       | 0       | 0       | 0        | 0        | 0       | 0.00017 |
| 0       | 0       | 0       | 0       | 0        | 0        | 0       | 0       |
| 0.06819 | 0       | 0.00182 | 0       | 0.00046  | 0.00026  | 0.002   | 0.01652 |
| 0.00048 | 0       | 0       | 0       | 0        | 0        | 0       | 0.00204 |
| 0.00357 | 0       | 0       | 0       | 0.00057  | 0.00067  | 0.00069 | 0.00881 |
| 0.00071 | 0       | 0       | 0       | 0        | 0        | 0       | 0.00022 |
| 0.00772 | 0.0018  | 0.00061 | 0       | 0        | 0.00134  | 0.01486 | 0.12581 |
| 0.0173  | 0       | 0.00009 | 0       | 0        | 0.00061  | 0.00163 | 0.02998 |
| 0       | 0       | 0       | 0       | 0        | 0        | 0       | 0       |
| 0.00571 | 0       | 0.00054 | 0       | 0        | 0.00221  | 0.00305 | 0       |
| 0       | 0       | 0       | 0       | 0        | 0        | 0       | 0.00057 |
| 0       | 0       | 0       | 0       | 0        | 0        | 0       | 0.0024  |
| 0       | 0       | 0       | 0       | 0        | 0        | 0       | 0       |
| 0       | 0       | 0       | 0       | 0        | 0        | 0       | 0.00018 |
| 0.00074 | 0.47202 | 0.22474 | 0.03034 | 2.21375  | 0.03501  | 0.44747 | 0.14906 |
| 0.00074 | 0.47202 | 0.22474 | 0.03034 | 2.21375  | 0.03501  | 0.44747 | 0.14906 |
| 0       | 0       | 0       | 0       | 0        | 0        | 0       | 0       |
| 0       | 0       | 0       | 0       | 0        | 0        | 0       | 0       |
| 0       | 0       | 0       | 0       | 0        | 0        | 0       | 0       |
| 0       | 0       | 0       | 0       | 0        | 0        | 0       | 0       |
| 0.00074 | 0.47202 | 0.22474 | 0.03034 | 2.21375  | 0.03501  | 0.44747 | 0.14906 |



|         |         |         |         |         |         |         |         |
|---------|---------|---------|---------|---------|---------|---------|---------|
| 0       | 0       | 0       | 0       | 0       | 0       | 0       | 0       |
| 0       | 0       | 0       | 0       | 0       | 0       | 0.0008  | 0       |
| 0       | 0       | 0       | 0       | 0       | 0       | 0       | 0       |
| 0       | 0       | 0       | 0       | 0       | 0       | 0       | 0       |
| 0       | 0       | 0       | 0       | 0       | 0       | 0       | 0       |
| 0.00074 | 0.03934 | 0.04974 | 0.02577 | 0.04202 | 0.0094  | 0.01104 | 0.14906 |
| 0       | 0.43269 | 0.175   | 0.00457 | 2.17173 | 0.02562 | 0.43563 | 0       |
| 0       | 0       | 0       | 0       | 0       | 0       | 0       | 0       |
| 0       | 0       | 0       | 0       | 0       | 0       | 0       | 0       |
| 0       | 0       | 0       | 0       | 0       | 0       | 0       | 0       |
| 0       | 0       | 0       | 0       | 0       | 0       | 0       | 0       |
| 0       | 0       | 0       | 0       | 0       | 0       | 0       | 0.00255 |
| 0       | 0       | 0       | 0       | 0       | 0       | 0       | 0.00255 |
| 0       | 0       | 0       | 0       | 0       | 0       | 0       | 0.00255 |
| 0       | 0       | 0       | 0       | 0       | 0       | 0       | 0.00255 |
| 0       | 0       | 0       | 0       | 0       | 0       | 0       | 0       |
| 0       | 0       | 0       | 0       | 0       | 0       | 0       | 0       |
| 0.0022  | 0       | 0.00081 | 0       | 0.00423 | 0.01385 | 0.00618 | 0.01558 |
| 0.0022  | 0       | 0.00081 | 0       | 0.00423 | 0.01385 | 0.00618 | 0.01558 |
| 0.0022  | 0       | 0.00081 | 0       | 0.00423 | 0.01385 | 0.00618 | 0.01558 |
| 0       | 0       | 0       | 0       | 0       | 0.00058 | 0       | 0.00171 |
| 0       | 0       | 0       | 0       | 0       | 0       | 0       | 0       |
| 0.0022  | 0       | 0.00081 | 0       | 0.00423 | 0.01327 | 0.00618 | 0.01387 |
| 0.00084 | 0       | 0.00598 | 0       | 0       | 0       | 0       | 0       |
| 0.00084 | 0       | 0.00598 | 0       | 0       | 0       | 0       | 0       |
| 0.00084 | 0       | 0.00598 | 0       | 0       | 0       | 0       | 0       |
| 0.00084 | 0       | 0.00598 | 0       | 0       | 0       | 0       | 0       |
| 0       | 0       | 0       | 0       | 0       | 0       | 0       | 0       |
| 0       | 0       | 0       | 0       | 0       | 0       | 0       | 0       |
| 0.1582  | 0.01986 | 0.25695 | 0.00653 | 0.11767 | 0.01869 | 0.04121 | 0.03588 |
| 0.00257 | 0       | 0.02082 | 0       | 0       | 0.00559 | 0.00124 | 0.00533 |
| 0.00162 | 0       | 0.02057 | 0       | 0       | 0.00559 | 0.00124 | 0.00533 |
| 0.00162 | 0       | 0.01908 | 0       | 0       | 0.00559 | 0.00124 | 0.00533 |
| 0       | 0       | 0       | 0       | 0       | 0       | 0       | 0       |
| 0.00162 | 0       | 0.00846 | 0       | 0       | 0.00545 | 0.00124 | 0.00506 |

|          |          |          |          |          |          |          |         |
|----------|----------|----------|----------|----------|----------|----------|---------|
| 0        | 0        | 0.01063  | 0        | 0        | 0.00014  | 0        | 0.00027 |
| 0        | 0        | 0.00149  | 0        | 0        | 0        | 0        | 0       |
| 0        | 0        | 0        | 0        | 0        | 0        | 0        | 0       |
| 0        | 0        | 0.00149  | 0        | 0        | 0        | 0        | 0       |
| 0.00095  | 0        | 0.00024  | 0        | 0        | 0        | 0        | 0       |
| 0.00087  | 0        | 0.00024  | 0        | 0        | 0        | 0        | 0       |
| 0.00034  | 0        | 0.00015  | 0        | 0        | 0        | 0        | 0       |
| 0.00038  | 0        | 0        | 0        | 0        | 0        | 0        | 0       |
| 0.00015  | 0        | 0.00009  | 0        | 0        | 0        | 0        | 0       |
| 0.00008  | 0        | 0        | 0        | 0        | 0        | 0        | 0       |
| 0.00008  | 0        | 0        | 0        | 0        | 0        | 0        | 0       |
| 0        | 0        | 0        | 0        | 0        | 0        | 0        | 0       |
| 0.15563  | 0.01986  | 0.23613  | 0.00653  | 0.11767  | 0.0131   | 0.03998  | 0.03055 |
| 0.15563  | 0.01986  | 0.23613  | 0.00653  | 0.11767  | 0.0131   | 0.03998  | 0.03055 |
| 0        | 0        | 0        | 0        | 0.05187  | 0        | 0.01249  | 0       |
| 0        | 0        | 0        | 0        | 0.05187  | 0        | 0.01249  | 0       |
| 0        | 0        | 0        | 0        | 0.01379  | 0        | 0.00379  | 0       |
| 0        | 0        | 0        | 0        | 0.01379  | 0        | 0.00379  | 0       |
| 0.13959  | 0.01746  | 0.21038  | 0.00631  | 0.03599  | 0.005    | 0.0183   | 0.02926 |
| 0.13959  | 0.01746  | 0.21038  | 0.00631  | 0.03599  | 0.005    | 0.0183   | 0.02926 |
| 0        | 0        | 0        | 0        | 0.00015  | 0        | 0        | 0       |
| 0        | 0        | 0        | 0        | 0.00015  | 0        | 0        | 0       |
| 0.01604  | 0.0024   | 0.02273  | 0.00023  | 0.01586  | 0.0081   | 0.00538  | 0.00129 |
| 0.01604  | 0.0024   | 0.02273  | 0.00023  | 0.01586  | 0.0081   | 0.00538  | 0.00129 |
| 0        | 0        | 0.00302  | 0        | 0        | 0        | 0        | 0       |
| 0        | 0        | 0.00302  | 0        | 0        | 0        | 0        | 0       |
| 64.93894 | 75.85009 | 80.75881 | 85.22582 | 47.40815 | 51.7437  | 34.75329 | 7.93421 |
| 0        | 0        | 0        | 0        | 0        | 0        | 0        | 0       |
| 0        | 0        | 0        | 0        | 0        | 0        | 0        | 0       |
| 0        | 0        | 0        | 0        | 0        | 0        | 0        | 0       |
| 0        | 0        | 0        | 0        | 0        | 0        | 0        | 0       |
| 0        | 0        | 0        | 0        | 0        | 0        | 0        | 0       |
| 64.93894 | 75.85009 | 80.75881 | 85.22582 | 47.40815 | 51.7437  | 34.75329 | 7.93421 |
| 64.93894 | 75.85009 | 80.75881 | 85.22582 | 47.40815 | 51.7437  | 34.75329 | 7.93421 |
| 28.40433 | 74.00968 | 65.49286 | 83.03957 | 31.18691 | 49.20188 | 30.04984 | 5.93257 |

|          |          |          |          |          |          |          |         |
|----------|----------|----------|----------|----------|----------|----------|---------|
| 28.40433 | 74.00968 | 65.49286 | 83.03957 | 31.18691 | 49.20188 | 30.04984 | 5.93257 |
| 0        | 0        | 0        | 0        | 0        | 0        | 0        | 0.19677 |
| 0.05338  | 2.74397  | 0.33031  | 3.23357  | 0.52477  | 0        | 0.06255  | 0       |
| 0        | 0        | 0        | 0        | 0        | 0        | 0        | 0       |
| 0        | 0.00043  | 0        | 0        | 0        | 0        | 0.00021  | 0.00164 |
| 0        | 0        | 0        | 0        | 0        | 0        | 0        | 0.00015 |
| 0        | 0        | 0        | 0        | 0        | 0        | 0        | 0       |
| 0        | 0        | 0        | 0        | 0        | 0        | 0        | 0       |
| 0        | 0        | 0        | 0        | 0        | 0        | 0        | 0       |
| 0.00056  | 8.16806  | 32.12541 | 4.70461  | 0.88648  | 0.00241  | 0.12946  | 0.05242 |
| 0.01725  | 0.12262  | 0.04099  | 0.30721  | 0.33662  | 0        | 0.0641   | 0       |
| 0        | 0        | 0        | 0        | 0        | 0        | 0        | 0       |
| 0        | 0.01248  | 0.04484  | 0.04627  | 0.01062  | 0        | 0.00027  | 0       |
| 0.25131  | 4.2109   | 0.69281  | 3.77012  | 2.45491  | 0.31397  | 1.49032  | 0.03125 |
| 0        | 0        | 0.00016  | 0        | 0        | 0        | 0        | 0.0003  |
| 0        | 0        | 0        | 0        | 0        | 0        | 0        | 0       |
| 0        | 0        | 0        | 0        | 0        | 0        | 0        | 0       |
| 0        | 0        | 0        | 0        | 0        | 0        | 0        | 0       |
| 1.58679  | 0.00188  | 0.00011  | 0.00062  | 2.56752  | 1.20022  | 5.96137  | 3.54919 |
| 0.38379  | 5.17963  | 10.73021 | 12.97966 | 2.74349  | 0.33204  | 1.97113  | 0.23639 |
| 1.3179   | 32.44077 | 6.0161   | 28.72197 | 10.13321 | 0.23701  | 4.61239  | 0.07191 |
| 24.64504 | 21.11217 | 15.50244 | 29.20522 | 11.51014 | 47.11425 | 15.74031 | 1.72673 |
| 0.1483   | 0.01677  | 0.00949  | 0.07033  | 0.01914  | 0.00198  | 0.01772  | 0.06581 |
| 0        | 0        | 0        | 0        | 0        | 0        | 0        | 0       |
| 0        | 0        | 0        | 0        | 0        | 0        | 0        | 0       |
| 0        | 0        | 0        | 0        | 0        | 0        | 0        | 0       |
| 0        | 0        | 0        | 0        | 0        | 0        | 0        | 0       |
| 0        | 0        | 0        | 0        | 0        | 0        | 0        | 0       |
| 0        | 0        | 0        | 0        | 0        | 0        | 0        | 0       |
| 0.42133  | 0.28129  | 1.33196  | 0.05238  | 2.77394  | 1.12045  | 0.88879  | 0       |
| 0.42133  | 0.28129  | 1.33196  | 0.05238  | 1.20112  | 0        | 0.03961  | 0       |
| 0        | 0        | 0        | 0        | 0        | 0        | 0        | 0       |
| 0.42133  | 0.28129  | 1.33196  | 0.05238  | 1.20112  | 0        | 0.03961  | 0       |
| 0        | 0        | 0        | 0        | 1.57282  | 1.12045  | 0.84919  | 0       |
| 0        | 0        | 0        | 0        | 0        | 0        | 0        | 0       |

|          |         |         |   |          |         |         |         |
|----------|---------|---------|---|----------|---------|---------|---------|
| 0        | 0       | 0       | 0 | 1.57282  | 1.12045 | 0.84919 | 0       |
| 0        | 0       | 0       | 0 | 0        | 0       | 0       | 0       |
| 0        | 0       | 0       | 0 | 0        | 0       | 0       | 0       |
| 0        | 0       | 0       | 0 | 0        | 0       | 0       | 0       |
| 0        | 0       | 0       | 0 | 0        | 0       | 0       | 0       |
| 0        | 0       | 0       | 0 | 0        | 0       | 0       | 0       |
| 0        | 0       | 0       | 0 | 0        | 0       | 0       | 0       |
| 0        | 0       | 0       | 0 | 0        | 0       | 0       | 0       |
| 31.59604 | 0       | 0.0023  | 0 | 0        | 0       | 0       | 0.00299 |
| 0        | 0       | 0       | 0 | 0        | 0       | 0       | 0       |
| 0        | 0       | 0       | 0 | 0        | 0       | 0       | 0       |
| 0        | 0       | 0       | 0 | 0        | 0       | 0       | 0       |
| 0        | 0       | 0       | 0 | 0        | 0       | 0       | 0       |
| 0        | 0       | 0       | 0 | 0        | 0       | 0       | 0       |
| 31.59604 | 0       | 0.0023  | 0 | 0        | 0       | 0       | 0.00299 |
| 0        | 0       | 0       | 0 | 0        | 0       | 0       | 0.00299 |
| 0        | 0       | 0       | 0 | 0        | 0       | 0       | 0       |
| 0        | 0       | 0       | 0 | 0        | 0       | 0       | 0       |
| 0        | 0       | 0       | 0 | 0        | 0       | 0       | 0       |
| 31.59604 | 0       | 0       | 0 | 0        | 0       | 0       | 0       |
| 0        | 0       | 0       | 0 | 0        | 0       | 0       | 0       |
| 0        | 0       | 0       | 0 | 0        | 0       | 0       | 0       |
| 0        | 0       | 0       | 0 | 0        | 0       | 0       | 0       |
| 0        | 0       | 0       | 0 | 0        | 0       | 0       | 0       |
| 0        | 0       | 0       | 0 | 0        | 0       | 0       | 0       |
| 0        | 0       | 0       | 0 | 0        | 0       | 0       | 0       |
| 0        | 0       | 0       | 0 | 0        | 0       | 0       | 0       |
| 0        | 0       | 0       | 0 | 0        | 0       | 0       | 0       |
| 0        | 0       | 0       | 0 | 0        | 0       | 0       | 0       |
| 0        | 0       | 0       | 0 | 0        | 0       | 0       | 0       |
| 0        | 0       | 0       | 0 | 0        | 0       | 0       | 0       |
| 0        | 0       | 0.0023  | 0 | 0        | 0       | 0       | 0       |
| 1.16555  | 0.01315 | 0.06386 | 0 | 11.14918 | 0.22047 | 2.78429 | 0.00012 |
| 1.16555  | 0.01315 | 0.06386 | 0 | 11.14918 | 0.22047 | 2.78429 | 0.00012 |



|         |         |         |        |         |         |         |         |
|---------|---------|---------|--------|---------|---------|---------|---------|
| 0       | 0       | 0       | 0      | 0       | 0       | 0       | 0.00051 |
| 0       | 0       | 0       | 0      | 0       | 0       | 0       | 0.00044 |
| 0       | 0       | 0       | 0      | 0       | 0       | 0       | 0.00006 |
| 0.06295 | 0       | 0.04853 | 0      | 0.02375 | 0.00031 | 0.05898 | 0.01605 |
| 0.06295 | 0       | 0.04853 | 0      | 0.02375 | 0.00031 | 0.05898 | 0.01605 |
| 0       | 0       | 0       | 0      | 0       | 0       | 0       | 0       |
| 0.02677 | 0       | 0.04853 | 0      | 0       | 0       | 0       | 0.00053 |
| 0       | 0       | 0       | 0      | 0       | 0       | 0       | 0       |
| 0.03618 | 0       | 0       | 0      | 0.02375 | 0.00031 | 0.02464 | 0       |
| 0       | 0       | 0       | 0      | 0       | 0       | 0       | 0.01196 |
| 0       | 0       | 0       | 0      | 0       | 0       | 0.03435 | 0       |
| 0       | 0       | 0       | 0      | 0       | 0       | 0       | 0.00356 |
| 0       | 0       | 0       | 0      | 0       | 0       | 0       | 0       |
| 0       | 0       | 0       | 0      | 0       | 0       | 0       | 0       |
| 0       | 0       | 0       | 0      | 0       | 0       | 0       | 0       |
| 0       | 0       | 0       | 0      | 0.12224 | 0.03012 | 0.01494 | 0.00314 |
| 0       | 0       | 0       | 0      | 0.12224 | 0.03012 | 0.01494 | 0.00314 |
| 0       | 0       | 0       | 0      | 0       | 0       | 0       | 0       |
| 0       | 0       | 0       | 0      | 0.00174 | 0       | 0       | 0       |
| 0       | 0       | 0       | 0      | 0.00616 | 0       | 0       | 0       |
| 0       | 0       | 0       | 0      | 0.09115 | 0.02623 | 0       | 0       |
| 0       | 0       | 0       | 0      | 0.01321 | 0       | 0       | 0.00314 |
| 0       | 0       | 0       | 0      | 0.00075 | 0.00389 | 0       | 0       |
| 0       | 0       | 0       | 0      | 0       | 0       | 0       | 0       |
| 0       | 0       | 0       | 0      | 0.00024 | 0       | 0.01494 | 0       |
| 0       | 0       | 0       | 0      | 0.00899 | 0       | 0       | 0       |
| 0       | 0       | 0       | 0      | 0       | 0       | 0       | 0       |
| 0       | 0       | 0       | 0      | 0       | 0       | 0       | 0       |
| 0       | 0       | 0       | 0      | 0       | 0       | 0       | 0       |
| 0       | 0       | 0       | 0      | 0       | 0       | 0       | 0       |
| 0       | 0       | 0       | 0      | 0       | 0       | 0       | 0       |
| 0       | 0       | 0       | 0      | 0       | 0       | 0       | 0       |
| 0       | 0       | 0       | 0      | 0       | 0       | 0       | 0       |
| 0       | 0       | 0       | 0      | 0       | 0       | 0       | 0       |
| 0       | 0       | 0       | 0      | 0       | 0       | 0       | 0       |
| 0       | 0       | 0       | 0      | 0       | 0       | 0       | 0       |
| 0       | 0       | 0       | 0      | 0       | 0       | 0       | 0       |
| 0       | 0       | 0       | 0      | 0       | 0       | 0       | 0       |
| 0       | 0       | 0       | 0      | 0       | 0       | 0       | 0       |
| 0       | 0       | 0       | 0      | 0       | 0       | 0       | 0       |
| 0.23801 | 0.08516 | 0.01536 | 0.0306 | 0.53378 | 0.8994  | 0.05033 | 0.60481 |

|         |          |         |         |          |         |         |          |
|---------|----------|---------|---------|----------|---------|---------|----------|
| 0.23801 | 0.08516  | 0.01536 | 0.0306  | 0.53378  | 0.8994  | 0.05033 | 0.60481  |
| 0.0013  | 0        | 0       | 0       | 0.00125  | 0       | 0       | 0.00326  |
| 0.0027  | 0        | 0       | 0       | 0        | 0       | 0       | 0.0139   |
| 0       | 0        | 0       | 0.00084 | 0        | 0.01308 | 0       | 0.00609  |
| 0       | 0        | 0       | 0       | 0        | 0       | 0       | 0        |
| 0.0082  | 0        | 0       | 0       | 0        | 0       | 0       | 0.00639  |
| 0.00291 | 0        | 0.00078 | 0       | 0        | 0.01025 | 0.00164 | 0.03946  |
| 0       | 0        | 0       | 0       | 0        | 0       | 0       | 0        |
| 0       | 0        | 0.00029 | 0       | 0.00246  | 0       | 0.0009  | 0.00425  |
| 0.00274 | 0.00263  | 0       | 0.00042 | 0        | 0.00299 | 0.01366 | 0.08998  |
| 0       | 0        | 0       | 0       | 0        | 0       | 0       | 0        |
| 0.00686 | 0        | 0       | 0       | 0.00816  | 0.07429 | 0.00168 | 0.26853  |
| 0.18252 | 0.01388  | 0.00702 | 0.00447 | 0.07857  | 0.78482 | 0.00771 | 0.09598  |
| 0       | 0        | 0       | 0       | 0        | 0       | 0       | 0        |
| 0       | 0        | 0       | 0       | 0        | 0       | 0       | 0        |
| 0.01832 | 0.06865  | 0.00727 | 0.02487 | 0.44334  | 0.01372 | 0.02393 | 0.04544  |
| 0.00747 | 0        | 0       | 0       | 0        | 0       | 0.00081 | 0.03088  |
| 0       | 0        | 0       | 0       | 0        | 0       | 0       | 0.00067  |
| 0.00068 | 0        | 0       | 0       | 0        | 0.00025 | 0       | 0        |
| 0       | 0        | 0       | 0       | 0        | 0       | 0       | 0        |
| 0       | 0        | 0       | 0       | 0        | 0       | 0       | 0        |
| 0       | 0        | 0       | 0       | 0        | 0       | 0       | 0        |
| 0       | 0        | 0       | 0       | 0        | 0       | 0       | 0        |
| 0       | 0        | 0       | 0       | 0        | 0       | 0       | 0        |
| 0       | 0        | 0       | 0       | 0        | 0       | 0       | 0        |
| 0.00432 | 0        | 0       | 0       | 0        | 0       | 0       | 0        |
| 0       | 0        | 0       | 0       | 0        | 0       | 0       | 0        |
| 0       | 0        | 0       | 0       | 0        | 0       | 0       | 0        |
| 0       | 0        | 0       | 0       | 0        | 0       | 0       | 0        |
| 12.3848 | 17.79178 | 5.93406 | 7.34452 | 24.29731 | 8.04707 | 42.9008 | 16.43441 |
| 12.3848 | 17.79178 | 5.93406 | 7.34452 | 24.29731 | 8.04707 | 42.9008 | 16.43441 |
| 0.03136 | 0.00052  | 0.16329 | 0       | 0.00805  | 0       | 0       | 0        |
| 0.03136 | 0.00052  | 0.16329 | 0       | 0.00805  | 0       | 0       | 0        |
| 0.03136 | 0.00052  | 0.16329 | 0       | 0.00805  | 0       | 0       | 0        |
| 0       | 0        | 0       | 0       | 0.00639  | 0       | 0       | 0        |

|         |         |         |         |         |         |         |         |
|---------|---------|---------|---------|---------|---------|---------|---------|
| 0       | 0       | 0       | 0       | 0.00639 | 0       | 0       | 0       |
| 0       | 0       | 0       | 0       | 0.00639 | 0       | 0       | 0       |
| 0.35165 | 0.08354 | 0.22463 | 0.22177 | 0.36704 | 0.0363  | 0.41163 | 0.37802 |
| 0       | 0.04151 | 0.01665 | 0.09264 | 0       | 0       | 0       | 0       |
| 0       | 0.04151 | 0.01665 | 0.09264 | 0       | 0       | 0       | 0       |
| 0.19328 | 0.00247 | 0       | 0.00235 | 0.17176 | 0.0363  | 0.40824 | 0.37261 |
| 0       | 0       | 0       | 0       | 0       | 0       | 0       | 0       |
| 0       | 0.00092 | 0       | 0.00235 | 0       | 0       | 0       | 0.20448 |
| 0       | 0       | 0       | 0       | 0       | 0       | 0       | 0       |
| 0       | 0       | 0       | 0       | 0       | 0       | 0       | 0       |
| 0       | 0       | 0       | 0       | 0       | 0       | 0.0025  | 0       |
| 0       | 0       | 0       | 0       | 0       | 0       | 0       | 0       |
| 0       | 0       | 0       | 0       | 0       | 0       | 0       | 0       |
| 0       | 0.00155 | 0       | 0       | 0       | 0       | 0       | 0.16813 |
| 0       | 0       | 0       | 0       | 0       | 0       | 0       | 0       |
| 0.19328 | 0       | 0       | 0       | 0       | 0       | 0       | 0       |
| 0       | 0       | 0       | 0       | 0.00063 | 0       | 0.37741 | 0       |
| 0       | 0       | 0       | 0       | 0       | 0       | 0       | 0       |
| 0       | 0       | 0       | 0       | 0.16481 | 0.0363  | 0.02833 | 0       |
| 0       | 0       | 0       | 0       | 0.00632 | 0       | 0       | 0       |
| 0       | 0       | 0       | 0       | 0       | 0       | 0       | 0       |
| 0.14161 | 0.03956 | 0.20799 | 0.12678 | 0.19528 | 0       | 0.00339 | 0.00541 |
| 0       | 0       | 0       | 0       | 0       | 0       | 0       | 0       |
| 0.14161 | 0.03956 | 0.20799 | 0.12678 | 0.19528 | 0       | 0.00339 | 0.00541 |
| 0.01677 | 0       | 0       | 0       | 0       | 0       | 0       | 0       |
| 0.01677 | 0       | 0       | 0       | 0       | 0       | 0       | 0       |
| 0.00331 | 0       | 0.00085 | 0       | 0       | 0.00063 | 0.00228 | 0.01227 |
| 0.0031  | 0       | 0.00014 | 0       | 0       | 0.00063 | 0.00147 | 0.00328 |
| 0       | 0       | 0.00014 | 0       | 0       | 0.00063 | 0       | 0       |
| 0       | 0       | 0       | 0       | 0       | 0       | 0       | 0       |
| 0       | 0       | 0       | 0       | 0       | 0       | 0       | 0       |
| 0.0031  | 0       | 0       | 0       | 0       | 0       | 0.00147 | 0.00328 |
| 0.00021 | 0       | 0.00071 | 0       | 0       | 0       | 0.00081 | 0.00898 |
| 0.00021 | 0       | 0.00071 | 0       | 0       | 0       | 0.00081 | 0.00898 |
| 0.05226 | 0.00546 | 0.03779 | 0.00059 | 0.26222 | 0       | 0.04398 | 0       |



|         |         |         |         |          |         |          |          |
|---------|---------|---------|---------|----------|---------|----------|----------|
| 0.00007 | 0       | 0       | 0       | 0.0016   | 0       | 0        | 0        |
| 0.00007 | 0       | 0       | 0       | 0.0016   | 0       | 0        | 0        |
| 0       | 0       | 0       | 0       | 0.26062  | 0       | 0.02709  | 0        |
| 0       | 0       | 0       | 0       | 0.26062  | 0       | 0.02709  | 0        |
| 0.05219 | 0.00546 | 0.03779 | 0.00059 | 0        | 0       | 0        | 0        |
| 0.05219 | 0.00546 | 0.03779 | 0.00059 | 0        | 0       | 0        | 0        |
| 0       | 0       | 0       | 0       | 0        | 0       | 0.01689  | 0        |
| 0       | 0       | 0       | 0       | 0        | 0       | 0.01689  | 0        |
| 0.00638 | 0.00713 | 0.07005 | 0       | 2.34708  | 0.349   | 12.75672 | 0.08002  |
| 0       | 0.0015  | 0       | 0       | 0        | 0       | 0        | 0        |
| 0       | 0.0015  | 0       | 0       | 0        | 0       | 0        | 0        |
| 0       | 0       | 0       | 0       | 0        | 0       | 0        | 0        |
| 0       | 0       | 0       | 0       | 0        | 0       | 0        | 0        |
| 0.00638 | 0.00563 | 0.07005 | 0       | 2.34708  | 0.349   | 12.75672 | 0.08002  |
| 0       | 0       | 0       | 0       | 0        | 0       | 0        | 0        |
| 0       | 0       | 0       | 0       | 0        | 0       | 0        | 0.04778  |
| 0       | 0       | 0       | 0       | 0.81005  | 0.00032 | 0.18749  | 0        |
| 0       | 0       | 0       | 0       | 0.3126   | 0.08083 | 0.2962   | 0        |
| 0.00572 | 0.00563 | 0.07005 | 0       | 0        | 0       | 0        | 0        |
| 0       | 0       | 0       | 0       | 0.16371  | 0.13508 | 0.03127  | 0        |
| 0.00067 | 0       | 0       | 0       | 0        | 0       | 0        | 0        |
| 0       | 0       | 0       | 0       | 0.59539  | 0.07923 | 4.7244   | 0        |
| 0       | 0       | 0       | 0       | 0.12638  | 0       | 0.09977  | 0        |
| 0       | 0       | 0       | 0       | 0.33832  | 0.05354 | 7.40706  | 0.03224  |
| 0       | 0       | 0       | 0       | 0        | 0       | 0        | 0        |
| 0       | 0       | 0       | 0       | 0.00062  | 0       | 0.01053  | 0        |
| 0       | 0       | 0       | 0       | 0        | 0       | 0        | 0        |
| 0       | 0       | 0       | 0       | 0        | 0       | 0        | 0        |
| 6.03766 | 9.6741  | 1.44914 | 3.33139 | 12.84808 | 5.04252 | 20.62847 | 14.37203 |
| 0       | 0       | 0       | 0       | 0.05195  | 0.00497 | 0.13128  | 0.00882  |
| 0       | 0       | 0       | 0       | 0        | 0       | 0        | 0.00882  |
| 0       | 0       | 0       | 0       | 0.05195  | 0.00497 | 0.13128  | 0        |
| 0.16318 | 0.0038  | 0.17389 | 0       | 0        | 0       | 0        | 0.01593  |
| 0.16318 | 0.0038  | 0.17389 | 0       | 0        | 0       | 0        | 0.01593  |
| 3.85594 | 0.87613 | 0.5204  | 0.20179 | 0.21417  | 0.05784 | 0.07455  | 13.9139  |

|         |         |         |         |         |         |         |          |
|---------|---------|---------|---------|---------|---------|---------|----------|
| 0       | 0       | 0       | 0       | 0       | 0       | 0       | 0        |
| 0.01149 | 0       | 0       | 0       | 0       | 0       | 0       | 0.02219  |
| 0       | 0       | 0       | 0       | 0       | 0       | 0       | 0        |
| 0       | 0       | 0       | 0       | 0.11497 | 0.04398 | 0.03233 | 0        |
| 0.00616 | 0.0419  | 0.01524 | 0       | 0       | 0       | 0       | 0        |
| 0.84799 | 0.09155 | 0.12093 | 0.00201 | 0       | 0       | 0       | 0.03766  |
| 0.4993  | 0.71396 | 0.17881 | 0.0542  | 0.02837 | 0.00835 | 0.02253 | 0        |
| 2.491   | 0.02872 | 0.20542 | 0.14559 | 0       | 0       | 0       | 13.85405 |
| 0       | 0       | 0       | 0       | 0.07084 | 0.00551 | 0.0197  | 0        |
| 0       | 0       | 0       | 0       | 0       | 0       | 0       | 0.0093   |
| 0       | 0       | 0       | 0       | 0       | 0       | 0       | 0.0093   |
| 0       | 0       | 0       | 0       | 0.47566 | 0.20296 | 0.40962 | 0        |
| 0       | 0       | 0       | 0       | 0.27404 | 0.04397 | 0.15496 | 0        |
| 0       | 0       | 0       | 0       | 0.20162 | 0.159   | 0.25466 | 0        |
| 0       | 0       | 0       | 0       | 0.37415 | 0.45057 | 0.18378 | 0        |
| 0       | 0       | 0       | 0       | 0.16166 | 0.03187 | 0.09597 | 0        |
| 0       | 0       | 0       | 0       | 0.21249 | 0.4187  | 0.08781 | 0        |
| 0       | 0       | 0       | 0       | 0       | 0       | 0       | 0        |
| 0.00022 | 0       | 0       | 0       | 0.00174 | 0       | 0       | 0.00412  |
| 0       | 0       | 0       | 0       | 0       | 0       | 0       | 0        |
| 0.00022 | 0       | 0       | 0       | 0.00174 | 0       | 0       | 0.00412  |
| 0       | 0       | 0       | 0       | 0       | 0       | 0       | 0        |
| 0       | 0       | 0       | 0       | 0       | 0       | 0       | 0        |
| 0       | 0       | 0       | 0       | 0.427   | 0       | 0.07967 | 0        |
| 0       | 0       | 0       | 0       | 0.427   | 0       | 0.07967 | 0        |
| 0       | 0       | 0       | 0       | 0       | 0       | 0       | 0        |
| 0       | 0       | 0       | 0       | 0       | 0       | 0       | 0        |
| 1.6844  | 0.37847 | 0.67951 | 3.12927 | 0.19173 | 0.01197 | 0.04111 | 0.15574  |
| 0.07283 | 0.00702 | 0.00506 | 0       | 0.01011 | 0       | 0       | 0.076    |
| 0.03146 | 0       | 0       | 0       | 0.00724 | 0       | 0.00108 | 0        |
| 1.18462 | 0.21931 | 0.36375 | 3.0734  | 0.09564 | 0.01176 | 0.01035 | 0.02537  |
| 0.03067 | 0       | 0       | 0       | 0.04036 | 0.00022 | 0.02202 | 0.01791  |
| 0.17353 | 0.08866 | 0.13917 | 0.04753 | 0.00247 | 0       | 0.00287 | 0        |
| 0       | 0       | 0       | 0       | 0       | 0       | 0       | 0        |
| 0.18354 | 0.02549 | 0.02105 | 0.00166 | 0.01845 | 0       | 0.00145 | 0.0005   |

|         |         |         |         |         |         |         |         |
|---------|---------|---------|---------|---------|---------|---------|---------|
| 0       | 0       | 0       | 0       | 0       | 0       | 0       | 0       |
| 0.00035 | 0       | 0       | 0       | 0       | 0       | 0       | 0.00061 |
| 0.00741 | 0.038   | 0.15049 | 0.00668 | 0.01747 | 0       | 0.00334 | 0.03535 |
| 0       | 0       | 0       | 0       | 0       | 0       | 0       | 0       |
| 0       | 0       | 0       | 0       | 0       | 0       | 0       | 0       |
| 0       | 0       | 0       | 0       | 2.2525  | 0.14986 | 6.37713 | 0.17194 |
| 0.01629 | 0       | 0       | 0       | 6.47648 | 1.45433 | 9.34985 | 0       |
| 0       | 0       | 0       | 0       | 6.47648 | 1.45433 | 9.34985 | 0       |
| 0.01629 | 0       | 0       | 0       | 0       | 0       | 0       | 0       |
| 0       | 0       | 0       | 0       | 0       | 0       | 0       | 0       |
| 0       | 0       | 0       | 0       | 2.2525  | 0.14986 | 6.37713 | 0.17194 |
| 0       | 0       | 0       | 0       | 0       | 0       | 0       | 0       |
| 0       | 0       | 0       | 0       | 0       | 0       | 0       | 0       |
| 0       | 0       | 0       | 0       | 0       | 0       | 0       | 0       |
| 0       | 0       | 0       | 0       | 0       | 0       | 0       | 0       |
| 0       | 0       | 0       | 0       | 0       | 0       | 0       | 0       |
| 0       | 0       | 0       | 0       | 0       | 0       | 0       | 0       |
| 0       | 0       | 0       | 0       | 0       | 0       | 0       | 0       |
| 0       | 0       | 0       | 0       | 0       | 0       | 0       | 0       |
| 0.02082 | 8.39917 | 0.05361 | 0       | 2.38269 | 2.71001 | 3.98147 | 0.09228 |
| 0       | 0       | 0       | 0       | 0.68306 | 0.77422 | 2.70015 | 0       |
| 0       | 0       | 0       | 0       | 1.33286 | 1.88778 | 0.75823 | 0       |
| 0       | 1.24739 | 0.00516 | 0       | 0.00983 | 0       | 0.08696 | 0.09228 |
| 0       | 7.15179 | 0.04845 | 0       | 0.33085 | 0.02625 | 0.40406 | 0       |
| 0       | 0       | 0       | 0       | 0.00518 | 0       | 0.00735 | 0       |
| 0.02082 | 0       | 0       | 0       | 0.02091 | 0.02175 | 0.02472 | 0       |
| 0.08478 | 0       | 0       | 0       | 0       | 0       | 0       | 0       |
| 0.08478 | 0       | 0       | 0       | 0       | 0       | 0       | 0       |
| 0       | 0       | 0       | 0       | 0       | 0       | 0       | 0       |
| 0       | 0       | 0       | 0       | 0       | 0       | 0       | 0       |
| 0       | 0       | 0       | 0       | 0       | 0       | 0       | 0       |
| 0       | 0       | 0       | 0       | 0       | 0       | 0       | 0       |
| 0.21203 | 0.01652 | 0.02173 | 0.00033 | 0       | 0       | 0       | 0       |
| 0.21203 | 0.01652 | 0.02173 | 0.00033 | 0       | 0       | 0       | 0       |

|         |         |         |         |         |         |         |         |
|---------|---------|---------|---------|---------|---------|---------|---------|
| 0       | 0.00032 | 0.00553 | 0       | 0.95257 | 0       | 2.43865 | 0       |
| 0       | 0.00032 | 0.00553 | 0       | 0.95257 | 0       | 2.43865 | 0       |
| 0       | 0       | 0       | 0       | 0.95257 | 0       | 2.43865 | 0       |
| 0       | 0.00032 | 0.00553 | 0       | 0       | 0       | 0       | 0       |
| 0.0819  | 0.007   | 0.0049  | 0.12576 | 0.00023 | 0       | 0       | 1.5545  |
| 0       | 0       | 0       | 0       | 0       | 0       | 0       | 1.53009 |
| 0       | 0       | 0       | 0       | 0       | 0       | 0       | 1.53009 |
| 0       | 0       | 0       | 0       | 0       | 0       | 0       | 0       |
| 0       | 0       | 0       | 0       | 0       | 0       | 0       | 0       |
| 0.0819  | 0.00653 | 0.00467 | 0.12576 | 0.00023 | 0       | 0       | 0.00227 |
| 0.0819  | 0.00653 | 0.00467 | 0.12576 | 0.00023 | 0       | 0       | 0.00227 |
| 0       | 0       | 0       | 0       | 0       | 0       | 0       | 0.01076 |
| 0       | 0       | 0       | 0       | 0       | 0       | 0       | 0.01076 |
| 0       | 0       | 0       | 0       | 0       | 0       | 0       | 0       |
| 0       | 0       | 0       | 0       | 0       | 0       | 0       | 0       |
| 0       | 0       | 0.00023 | 0       | 0       | 0       | 0       | 0       |
| 0       | 0       | 0       | 0       | 0       | 0       | 0       | 0       |
| 0       | 0       | 0.00023 | 0       | 0       | 0       | 0       | 0       |
| 0       | 0.00047 | 0       | 0       | 0       | 0       | 0       | 0       |
| 0       | 0.00047 | 0       | 0       | 0       | 0       | 0       | 0       |
| 0       | 0       | 0       | 0       | 0       | 0       | 0       | 0.01137 |
| 0       | 0       | 0       | 0       | 0       | 0       | 0       | 0.01137 |
| 5.82027 | 8.01371 | 3.97787 | 3.66501 | 7.50566 | 2.61862 | 6.61908 | 0.03757 |
| 0.08047 | 0       | 0       | 0       | 0.20815 | 0.17452 | 0.13701 | 0       |
| 0.08047 | 0       | 0       | 0       | 0.20815 | 0.17452 | 0.13701 | 0       |
| 0       | 0.00094 | 0.01118 | 0       | 0       | 0       | 0       | 0       |
| 0       | 0.00094 | 0.01118 | 0       | 0       | 0       | 0       | 0       |
| 0       | 0       | 0.01847 | 0       | 0       | 0       | 0       | 0       |
| 0       | 0       | 0.01847 | 0       | 0       | 0       | 0       | 0       |
| 0.08324 | 0.01089 | 0.1533  | 0       | 0.08103 | 0.00234 | 0.0062  | 0.02189 |
| 0.08324 | 0.01089 | 0.1533  | 0       | 0.08103 | 0.00234 | 0.0062  | 0.02189 |
| 0.27502 | 5.43831 | 3.337   | 2.86209 | 4.1306  | 0.66397 | 3.06267 | 0       |
| 0.27502 | 5.43831 | 3.337   | 2.86209 | 4.1306  | 0.66397 | 3.06267 | 0       |
| 4.43378 | 0.42144 | 0.13624 | 0.02839 | 0.0766  | 0.48245 | 0.03818 | 0.01569 |
| 4.43378 | 0.42144 | 0.13624 | 0.02839 | 0.0766  | 0.48245 | 0.03818 | 0.01569 |



|          |         |         |         |         |         |         |         |
|----------|---------|---------|---------|---------|---------|---------|---------|
| 0        | 0       | 0       | 0       | 0       | 0       | 0       | 0       |
| 0        | 0       | 0       | 0       | 0       | 0       | 0       | 0       |
| 1.04673  | 0.1407  | 0.15022 | 0.09701 | 0.02671 | 0.00216 | 0.00044 | 0.4014  |
| 0.16637  | 0.00268 | 0.01164 | 0.08688 | 0.00647 | 0.00216 | 0.00044 | 0.19299 |
| 0        | 0.00395 | 0.00891 | 0       | 0       | 0       | 0       | 0       |
| 0.88035  | 0.13407 | 0.12968 | 0.01014 | 0.02024 | 0       | 0       | 0.20841 |
| 0        | 0.00438 | 0.04523 | 0       | 0       | 0       | 0       | 0       |
| 0        | 0.00438 | 0.04523 | 0       | 0       | 0       | 0       | 0       |
| 0        | 0       | 0       | 0       | 0       | 0.00079 | 0       | 0       |
| 0        | 0       | 0       | 0       | 0       | 0.00079 | 0       | 0       |
| 0        | 0       | 0       | 0       | 0       | 0       | 0       | 0       |
| 0        | 0       | 0       | 0       | 0       | 0       | 0       | 0       |
| 0        | 0       | 0       | 0       | 0       | 0       | 0       | 0       |
| 0        | 0       | 0       | 0       | 0       | 0       | 0       | 0       |
| 0        | 0       | 0       | 0       | 0.01784 | 0       | 0       | 0       |
| 0        | 0       | 0       | 0       | 0.01784 | 0       | 0       | 0       |
| 0        | 0       | 0       | 0       | 0       | 0       | 0       | 0       |
| 0        | 0       | 0       | 0       | 0       | 0       | 0       | 0       |
| 0        | 0       | 0       | 0       | 0       | 0       | 0       | 0.0017  |
| 0        | 0       | 0       | 0       | 0       | 0       | 0       | 0.0017  |
| 0        | 0       | 0       | 0       | 0       | 0       | 0       | 0       |
| 0        | 0       | 0       | 0       | 0       | 0       | 0       | 0       |
| 0        | 0.00524 | 0.004   | 0       | 2.68479 | 0.47845 | 0.35885 | 0       |
| 0        | 0.00524 | 0.004   | 0       | 2.68479 | 0.47845 | 0.35885 | 0       |
| 0        | 0.00524 | 0.004   | 0       | 2.68479 | 0.47845 | 0.35885 | 0       |
| 0        | 0.00524 | 0.004   | 0       | 2.68479 | 0.47845 | 0.35885 | 0       |
| 0        | 0       | 0       | 0       | 0       | 0       | 0       | 0       |
| 0        | 0       | 0       | 0       | 0       | 0       | 0       | 0       |
| 0        | 0       | 0       | 0       | 0       | 0       | 0       | 0       |
| 0        | 0       | 0       | 0       | 0       | 0       | 0       | 0       |
| 0        | 0       | 0       | 0       | 0       | 0       | 0       | 0       |
| 0        | 0       | 0       | 0       | 0       | 0       | 0       | 0       |
| 0        | 0       | 0       | 0       | 2.68479 | 0.47845 | 0.35821 | 0       |
| 0        | 0.00524 | 0.004   | 0       | 0       | 0       | 0       | 0       |
| 0        | 0       | 0       | 0       | 0       | 0       | 0.00063 | 0       |
| 17.75986 | 4.30969 | 0.67704 | 2.08261 | 1.22879 | 1.53076 | 0.90588 | 0.098   |

|         |         |         |         |         |         |         |         |
|---------|---------|---------|---------|---------|---------|---------|---------|
| 8.39281 | 4.30757 | 0.67283 | 2.07957 | 0.76987 | 1.33075 | 0.87283 | 0.00968 |
| 8.39281 | 4.30757 | 0.67283 | 2.07957 | 0.76987 | 1.33075 | 0.87283 | 0.00968 |
| 4.64314 | 3.30966 | 0.18926 | 0       | 0       | 0       | 0       | 0       |
| 4.64314 | 3.30966 | 0.18926 | 0       | 0       | 0       | 0       | 0       |
| 0       | 0       | 0       | 0       | 0       | 0       | 0       | 0       |
| 3.74967 | 0.99791 | 0.48356 | 2.07957 | 0.76987 | 1.33075 | 0.87283 | 0.00968 |
| 3.74967 | 0.99791 | 0.48356 | 2.07957 | 0.76987 | 1.33075 | 0.87283 | 0.00968 |
| 0       | 0       | 0       | 0       | 0       | 0       | 0       | 0       |
| 8.97081 | 0       | 0       | 0       | 0       | 0.00015 | 0       | 0       |
| 8.97081 | 0       | 0       | 0       | 0       | 0.00015 | 0       | 0       |
| 8.97081 | 0       | 0       | 0       | 0       | 0       | 0       | 0       |
| 8.2078  | 0       | 0       | 0       | 0       | 0       | 0       | 0       |
| 0.76301 | 0       | 0       | 0       | 0       | 0       | 0       | 0       |
| 0       | 0       | 0       | 0       | 0       | 0       | 0       | 0       |
| 0       | 0       | 0       | 0       | 0       | 0       | 0       | 0       |
| 0       | 0       | 0       | 0       | 0       | 0.00015 | 0       | 0       |
| 0       | 0       | 0       | 0       | 0       | 0       | 0       | 0       |
| 0       | 0       | 0       | 0       | 0       | 0.00015 | 0       | 0       |
| 0       | 0       | 0       | 0       | 0       | 0       | 0       | 0       |
| 0       | 0       | 0       | 0       | 0       | 0       | 0       | 0       |
| 0.39624 | 0.00212 | 0.00421 | 0.00304 | 0.45891 | 0.19986 | 0.03306 | 0.08832 |
| 0.39624 | 0.00212 | 0.00421 | 0.00304 | 0.45891 | 0.19986 | 0.03306 | 0.08832 |
| 0       | 0.00113 | 0       | 0       | 0       | 0       | 0       | 0       |
| 0       | 0.00113 | 0       | 0       | 0       | 0       | 0       | 0       |
| 0       | 0.0002  | 0.00084 | 0       | 0       | 0       | 0       | 0       |
| 0       | 0.0002  | 0.00084 | 0       | 0       | 0       | 0       | 0       |
| 0       | 0       | 0       | 0       | 0       | 0       | 0.03132 | 0       |
| 0       | 0       | 0       | 0       | 0       | 0       | 0.03132 | 0       |
| 0       | 0       | 0       | 0       | 0       | 0       | 0       | 0       |
| 0       | 0       | 0       | 0       | 0       | 0       | 0       | 0       |
| 0.00176 | 0       | 0       | 0       | 0.00286 | 0.10962 | 0       | 0       |
| 0       | 0       | 0       | 0       | 0       | 0       | 0       | 0       |
| 0       | 0       | 0       | 0       | 0       | 0       | 0       | 0       |
| 0.00176 | 0       | 0       | 0       | 0.00286 | 0.10962 | 0       | 0       |
| 0       | 0       | 0       | 0       | 0       | 0       | 0       | 0       |

|         |         |         |         |         |         |         |         |
|---------|---------|---------|---------|---------|---------|---------|---------|
| 0       | 0       | 0       | 0       | 0       | 0       | 0       | 0       |
| 0.39448 | 0.00079 | 0.00337 | 0.00304 | 0.45605 | 0.09024 | 0.00174 | 0.08832 |
| 0.00147 | 0.00079 | 0       | 0       | 0.22497 | 0.00517 | 0.00052 | 0.01403 |
| 0.02695 | 0       | 0       | 0.00073 | 0.02386 | 0.0063  | 0       | 0       |
| 0.00998 | 0       | 0       | 0       | 0.00781 | 0.00709 | 0.00028 | 0       |
| 0.30761 | 0       | 0.00337 | 0.00231 | 0.15991 | 0.03191 | 0       | 0.0738  |
| 0       | 0       | 0       | 0       | 0       | 0       | 0       | 0.00049 |
| 0.00348 | 0       | 0       | 0       | 0       | 0.03713 | 0.00031 | 0       |
| 0.04412 | 0       | 0       | 0       | 0.01898 | 0.00222 | 0.00063 | 0       |
| 0.00087 | 0       | 0       | 0       | 0.02052 | 0.00042 | 0       | 0       |
| 0       | 0       | 0.00736 | 0       | 0.00503 | 0.0259  | 0.00955 | 0       |
| 0       | 0       | 0.00736 | 0       | 0.00503 | 0.0259  | 0.00955 | 0       |
| 0       | 0       | 0.00736 | 0       | 0.00503 | 0.0259  | 0.00955 | 0       |
| 0       | 0       | 0       | 0       | 0       | 0       | 0       | 0       |
| 0       | 0       | 0       | 0       | 0       | 0       | 0       | 0       |
| 0       | 0       | 0       | 0       | 0       | 0       | 0       | 0       |
| 0       | 0       | 0       | 0       | 0       | 0       | 0       | 0       |
| 0       | 0       | 0       | 0       | 0       | 0       | 0       | 0       |
| 0       | 0       | 0.00736 | 0       | 0.00503 | 0.0259  | 0.00955 | 0       |
| 0       | 0       | 0.00736 | 0       | 0.00503 | 0.0259  | 0.00955 | 0       |
| 0       | 0       | 0       | 0       | 0       | 0       | 0       | 0       |
| 0       | 0       | 0       | 0       | 0       | 0       | 0       | 0       |
| 0       | 0       | 0       | 0       | 0       | 0       | 0       | 0       |
| 0       | 0       | 0       | 0       | 0       | 0       | 0       | 0       |
| 0       | 0       | 0       | 0       | 0       | 0       | 0       | 0       |
| 0       | 0       | 0       | 0       | 0       | 0       | 0       | 0       |
| 0       | 0       | 0       | 0       | 0       | 0       | 0       | 0       |
| 0       | 0       | 0       | 0       | 0       | 0       | 0       | 0       |
| 0.21262 | 0.2972  | 0.2305  | 0       | 0.0013  | 0.002   | 0       | 0       |
| 0.21262 | 0.2972  | 0.2305  | 0       | 0.0013  | 0.002   | 0       | 0       |
| 0.21262 | 0.2972  | 0.2305  | 0       | 0.0013  | 0.002   | 0       | 0       |
| 0.21262 | 0.2972  | 0.2305  | 0       | 0.0013  | 0.002   | 0       | 0       |
| 0       | 0       | 0       | 0       | 0       | 0       | 0       | 0       |
| 0       | 0       | 0       | 0       | 0       | 0       | 0       | 0       |
| 0.21262 | 0.2972  | 0.2305  | 0       | 0.0013  | 0.002   | 0       | 0       |
| 0       | 0       | 0       | 0       | 0       | 0       | 0       | 0       |
| 0       | 0       | 0       | 0       | 0       | 0       | 0       | 0       |
| 0       | 0       | 0       | 0       | 0       | 0       | 0       | 0       |



|         |         |         |         |          |          |          |          |
|---------|---------|---------|---------|----------|----------|----------|----------|
| 0       | 0       | 0       | 0       | 0.0013   | 0.00185  | 0        | 0        |
| 0       | 0       | 0       | 0       | 0        | 0.00015  | 0        | 0        |
| 0       | 0       | 0       | 0       | 0        | 0        | 0        | 0        |
| 0.00331 | 0       | 0       | 0       | 0        | 0        | 0        | 0        |
| 0.20931 | 0.2972  | 0.2305  | 0       | 0        | 0        | 0        | 0        |
| 0       | 0       | 0       | 0       | 0        | 0        | 0        | 0        |
| 0       | 0       | 0       | 0       | 0        | 0        | 0        | 0        |
| 0       | 0       | 0       | 0       | 0        | 0        | 0        | 0        |
| 0       | 0       | 0       | 0       | 0        | 0        | 0        | 0        |
| 0       | 0       | 0       | 0       | 0        | 0        | 0        | 0        |
| 0       | 0       | 0       | 0       | 0        | 0        | 0        | 0        |
| 0       | 0       | 0       | 0       | 0        | 0        | 0        | 0        |
| 0       | 0       | 0       | 0       | 0        | 0        | 0        | 0        |
| 0       | 0       | 0       | 0       | 0        | 0        | 0        | 0        |
| 0       | 0       | 0       | 0       | 0        | 0        | 0        | 0        |
| 0       | 0       | 0       | 0       | 0        | 0        | 0        | 0        |
| 0       | 0       | 0       | 0       | 0        | 0        | 0        | 0        |
| 0       | 0       | 0       | 0       | 0        | 0        | 0        | 0        |
| 0       | 0       | 0       | 0       | 0        | 0        | 0        | 0        |
| 0       | 0       | 0       | 0       | 0        | 0        | 0        | 0        |
| 2.94511 | 0.2715  | 0.40377 | 3.15687 | 19.71423 | 37.05803 | 20.21436 | 73.91247 |
| 0.128   | 0.01124 | 0.00197 | 0       | 0.10201  | 0        | 0        | 0        |
| 0.128   | 0.01124 | 0.00197 | 0       | 0.10201  | 0        | 0        | 0        |
| 0.02036 | 0       | 0       | 0       | 0.00006  | 0        | 0        | 0        |
| 0.02036 | 0       | 0       | 0       | 0.00006  | 0        | 0        | 0        |
| 0.02036 | 0       | 0       | 0       | 0.00006  | 0        | 0        | 0        |
| 0       | 0       | 0       | 0       | 0        | 0        | 0        | 0        |
| 0       | 0       | 0       | 0       | 0        | 0        | 0        | 0        |
| 0       | 0       | 0       | 0       | 0        | 0        | 0        | 0        |
| 0       | 0.01124 | 0.00197 | 0       | 0.10194  | 0        | 0        | 0        |
| 0       | 0.01124 | 0.00197 | 0       | 0.10194  | 0        | 0        | 0        |
| 0       | 0.01124 | 0.00197 | 0       | 0.10194  | 0        | 0        | 0        |
| 0.10764 | 0       | 0       | 0       | 0        | 0        | 0        | 0        |
| 0       | 0       | 0       | 0       | 0        | 0        | 0        | 0        |
| 0       | 0       | 0       | 0       | 0        | 0        | 0        | 0        |
| 0.10764 | 0       | 0       | 0       | 0        | 0        | 0        | 0        |
| 0.10764 | 0       | 0       | 0       | 0        | 0        | 0        | 0        |



|         |         |         |        |          |          |          |          |
|---------|---------|---------|--------|----------|----------|----------|----------|
| 0       | 0       | 0       | 0      | 0        | 0        | 0.1285   | 0        |
| 0       | 0       | 0       | 0      | 0        | 0        | 0.1285   | 0        |
| 0       | 0       | 0       | 0      | 0        | 0        | 0.12207  | 0        |
| 0       | 0       | 0       | 0      | 0        | 0        | 0.00643  | 0        |
| 0       | 0       | 0       | 0      | 0        | 0        | 0        | 0        |
| 0       | 0       | 0       | 0      | 0        | 0        | 0        | 0        |
| 0       | 0       | 0       | 0      | 0        | 0        | 0        | 0        |
| 0       | 0       | 0       | 0      | 0        | 0        | 0        | 0        |
| 0       | 0       | 0       | 0      | 0        | 0        | 0        | 0        |
| 0       | 0       | 0       | 0      | 0        | 0        | 0        | 0        |
| 0       | 0       | 0       | 0      | 0        | 0        | 0        | 0        |
| 0       | 0       | 0       | 0      | 0        | 0        | 0        | 0        |
| 0       | 0       | 0       | 0      | 0        | 0        | 0        | 0        |
| 0       | 0       | 0       | 0      | 0        | 0        | 0        | 0        |
| 1.40848 | 0.15882 | 0.38832 | 3.1511 | 19.52608 | 36.99023 | 20.08586 | 73.90715 |
| 0       | 0       | 0       | 0      | 0        | 0        | 0        | 0        |
| 0       | 0       | 0       | 0      | 0        | 0        | 0        | 0        |
| 0       | 0       | 0       | 0      | 0        | 0        | 0        | 0        |
| 1.40848 | 0.15882 | 0.38832 | 3.1511 | 19.51728 | 36.96377 | 19.94625 | 73.88698 |
| 0       | 0       | 0       | 0      | 0        | 0        | 0        | 0        |
| 0       | 0       | 0       | 0      | 0        | 0        | 0        | 0        |
| 0       | 0       | 0       | 0      | 0        | 0        | 0        | 0        |
| 0       | 0       | 0       | 0      | 0        | 0        | 0        | 0        |
| 0       | 0       | 0       | 0      | 0        | 0        | 0        | 0        |
| 0       | 0       | 0       | 0      | 0        | 0        | 0        | 0        |
| 0       | 0       | 0       | 0      | 0        | 0        | 0        | 0        |
| 0       | 0       | 0       | 0      | 0        | 0        | 0        | 0        |
| 0       | 0       | 0       | 0      | 0        | 0        | 0        | 0        |
| 0       | 0       | 0       | 0      | 0        | 0        | 0        | 0        |
| 0       | 0       | 0       | 0      | 0        | 0        | 0        | 0        |
| 0       | 0.00193 | 0       | 0      | 0        | 0        | 0        | 0        |
| 0       | 0.00193 | 0       | 0      | 0        | 0        | 0        | 0        |
| 0       | 0.00661 | 0       | 0      | 0        | 0        | 0        | 6.36428  |
| 0       | 0       | 0       | 0      | 0        | 0        | 0        | 0        |
| 0       | 0.00661 | 0       | 0      | 0        | 0        | 0        | 6.36428  |





|   |         |         |         |         |         |         |   |
|---|---------|---------|---------|---------|---------|---------|---|
| 0 | 0.75058 | 11.2226 | 2.02569 | 0.56481 | 0       | 0.09975 | 0 |
| 0 | 0.75058 | 11.2226 | 2.02569 | 0.56481 | 0       | 0.09975 | 0 |
| 0 | 0.75058 | 11.2226 | 2.02569 | 0.56481 | 0       | 0.09975 | 0 |
| 0 | 0.75058 | 11.2226 | 2.02569 | 0.56481 | 0       | 0.09975 | 0 |
| 0 | 0.75058 | 11.2226 | 2.02569 | 0.56481 | 0       | 0.09975 | 0 |
| 0 | 0.75058 | 11.2226 | 2.02569 | 0.56481 | 0       | 0.09975 | 0 |
| 0 | 0       | 0       | 0       | 0.96136 | 0.06555 | 0.0526  | 0 |
| 0 | 0       | 0       | 0       | 0.96136 | 0.06555 | 0.0526  | 0 |
| 0 | 0       | 0       | 0       | 0.96136 | 0.06555 | 0.0526  | 0 |
| 0 | 0       | 0       | 0       | 0.96136 | 0.06555 | 0.0526  | 0 |
| 0 | 0       | 0       | 0       | 0.96136 | 0.06555 | 0.0526  | 0 |
| 0 | 0       | 0       | 0       | 0       | 0       | 0       | 0 |
| 0 | 0       | 0       | 0       | 0.96136 | 0.06555 | 0.0526  | 0 |
| 0 | 0       | 0       | 0       | 0       | 0       | 0       | 0 |
| 0 | 0       | 0       | 0       | 0       | 0       | 0       | 0 |
| 0 | 0       | 0       | 0       | 0       | 0       | 0       | 0 |
| 0 | 0       | 0       | 0       | 0       | 0.01742 | 0       | 0 |
| 0 | 0       | 0       | 0       | 0       | 0.01742 | 0       | 0 |
| 0 | 0       | 0       | 0       | 0       | 0.01742 | 0       | 0 |
| 0 | 0       | 0       | 0       | 0       | 0.01742 | 0       | 0 |
| 0 | 0       | 0       | 0       | 0       | 0       | 0       | 0 |
| 0 | 0       | 0       | 0       | 0       | 0       | 0       | 0 |
| 0 | 0       | 0       | 0       | 0       | 0       | 0       | 0 |
| 0 | 0       | 0       | 0       | 0       | 0       | 0       | 0 |
| 0 | 0       | 0       | 0       | 0       | 0.01742 | 0       | 0 |
| 0 | 0       | 0       | 0       | 0       | 0.01742 | 0       | 0 |
| 0 | 0       | 0       | 0       | 0       | 0.01742 | 0       | 0 |

---

| AP008_2 | AP008_3 | AP009_1 | AP009_2 | AP009_3 | AP010_1 | AP010_2 | AP010_3 |
|---------|---------|---------|---------|---------|---------|---------|---------|
| 99.9969 | 100     | 100     | 100     | 100     | 100     | 100     | 100     |
| 0.31568 | 0.73123 | 0.44516 | 0.68339 | 0.14243 | 2.2669  | 0.6649  | 1.03975 |
| 0.28252 | 0.52753 | 0.00493 | 0.02876 | 0.13426 | 1.83125 | 0.06569 | 1.02808 |
| 0.03293 | 0.31417 | 0.00043 | 0       | 0.04947 | 0       | 0       | 0.0124  |
| 0.03293 | 0.31417 | 0.00043 | 0       | 0.04947 | 0       | 0       | 0.0124  |
| 0       | 0       | 0       | 0       | 0       | 0       | 0       | 0       |
| 0       | 0       | 0       | 0       | 0       | 0       | 0       | 0       |
| 0.03293 | 0.31417 | 0.00043 | 0       | 0.04947 | 0       | 0       | 0.0124  |
| 0       | 0       | 0       | 0       | 0       | 0       | 0       | 0       |
| 0       | 0.02268 | 0.00043 | 0       | 0.00479 | 0       | 0       | 0.00032 |
| 0       | 0.00018 | 0       | 0       | 0       | 0       | 0       | 0       |
| 0       | 0.00098 | 0       | 0       | 0       | 0       | 0       | 0       |
| 0       | 0.00329 | 0       | 0       | 0       | 0       | 0       | 0       |
| 0.00043 | 0.01105 | 0       | 0       | 0       | 0       | 0       | 0       |
| 0.00979 | 0.03153 | 0       | 0       | 0.0024  | 0       | 0       | 0       |
| 0.00123 | 0.00353 | 0       | 0       | 0       | 0       | 0       | 0       |
| 0.00026 | 0.00671 | 0       | 0       | 0       | 0       | 0       | 0       |
| 0       | 0.00173 | 0       | 0       | 0       | 0       | 0       | 0       |
| 0.00311 | 0.20816 | 0       | 0       | 0.04009 | 0       | 0       | 0.01208 |
| 0.01738 | 0.01543 | 0       | 0       | 0.00013 | 0       | 0       | 0       |
| 0.00011 | 0       | 0       | 0       | 0       | 0       | 0       | 0       |
| 0       | 0       | 0       | 0       | 0.00205 | 0       | 0       | 0       |
| 0       | 0.0034  | 0       | 0       | 0       | 0       | 0       | 0       |
| 0.00064 | 0       | 0       | 0       | 0       | 0       | 0       | 0       |
| 0       | 0.0055  | 0       | 0       | 0       | 0       | 0       | 0       |
| 0       | 0       | 0       | 0       | 0       | 0       | 0       | 0       |
| 0.11219 | 0.15259 | 0.0045  | 0.01006 | 0.00797 | 1.83125 | 0.06569 | 1.01377 |
| 0.11219 | 0.15259 | 0.0045  | 0.01006 | 0.00797 | 1.83125 | 0.06569 | 1.01377 |
| 0       | 0       | 0       | 0       | 0       | 0       | 0       | 0       |
| 0       | 0       | 0       | 0       | 0       | 0       | 0       | 0       |
| 0       | 0       | 0       | 0       | 0       | 0       | 0       | 0       |
| 0       | 0       | 0       | 0       | 0       | 0       | 0       | 0       |
| 0.11219 | 0.1521  | 0.00405 | 0.0007  | 0.00673 | 1.83125 | 0.06569 | 1.01377 |

|         |         |         |         |         |         |         |         |
|---------|---------|---------|---------|---------|---------|---------|---------|
| 0       | 0       | 0       | 0       | 0       | 0       | 0       | 0       |
| 0       | 0       | 0       | 0       | 0       | 0       | 0       | 0       |
| 0       | 0       | 0       | 0       | 0       | 0       | 0       | 0       |
| 0       | 0       | 0       | 0       | 0       | 0.00383 | 0.0034  | 0.00167 |
| 0.00377 | 0       | 0.00405 | 0.0007  | 0.00673 | 0       | 0       | 0       |
| 0.10842 | 0.1521  | 0       | 0       | 0       | 0.47578 | 0.06229 | 0.37441 |
| 0       | 0       | 0       | 0       | 0       | 1.35164 | 0       | 0.63769 |
| 0       | 0       | 0       | 0       | 0       | 0       | 0       | 0       |
| 0       | 0       | 0       | 0       | 0       | 0       | 0       | 0       |
| 0       | 0.00049 | 0.00044 | 0.00936 | 0.00124 | 0       | 0       | 0       |
| 0       | 0.00049 | 0.00044 | 0.00936 | 0.00124 | 0       | 0       | 0       |
| 0.00054 | 0.00546 | 0       | 0       | 0       | 0       | 0       | 0       |
| 0.00054 | 0.00546 | 0       | 0       | 0       | 0       | 0       | 0       |
| 0.00054 | 0.00546 | 0       | 0       | 0       | 0       | 0       | 0       |
| 0.00054 | 0.0019  | 0       | 0       | 0       | 0       | 0       | 0       |
| 0       | 0.00356 | 0       | 0       | 0       | 0       | 0       | 0       |
| 0       | 0       | 0       | 0       | 0       | 0       | 0       | 0       |
| 0.13559 | 0.05531 | 0       | 0.00871 | 0.07632 | 0       | 0       | 0.00165 |
| 0.13559 | 0.05531 | 0       | 0.00871 | 0.07632 | 0       | 0       | 0.00165 |
| 0.13559 | 0.05531 | 0       | 0.00871 | 0.07632 | 0       | 0       | 0.00165 |
| 0.01049 | 0.00612 | 0       | 0       | 0       | 0       | 0       | 0       |
| 0.00879 | 0.00149 | 0       | 0       | 0       | 0       | 0       | 0       |
| 0.11631 | 0.04771 | 0       | 0.00871 | 0.07632 | 0       | 0       | 0.00165 |
| 0.00126 | 0       | 0       | 0.00999 | 0.0005  | 0       | 0       | 0.00026 |
| 0.00126 | 0       | 0       | 0.00999 | 0.0005  | 0       | 0       | 0.00026 |
| 0       | 0       | 0       | 0.00999 | 0.0005  | 0       | 0       | 0       |
| 0       | 0       | 0       | 0.00999 | 0.0005  | 0       | 0       | 0       |
| 0.00126 | 0       | 0       | 0       | 0       | 0       | 0       | 0.00026 |
| 0.00126 | 0       | 0       | 0       | 0       | 0       | 0       | 0.00026 |
| 0.03316 | 0.20369 | 0.44023 | 0.65462 | 0.00817 | 0.43564 | 0.5992  | 0.01167 |
| 0.00622 | 0.19343 | 0.41758 | 0.46083 | 0.00684 | 0       | 0       | 0       |
| 0.00622 | 0.00753 | 0.03477 | 0.01931 | 0.00134 | 0       | 0       | 0       |
| 0.00622 | 0.00753 | 0       | 0.00657 | 0.00134 | 0       | 0       | 0       |
| 0       | 0       | 0       | 0.00034 | 0       | 0       | 0       | 0       |
| 0.00531 | 0.00719 | 0       | 0.00335 | 0       | 0       | 0       | 0       |



|          |          |          |          |          |          |         |          |
|----------|----------|----------|----------|----------|----------|---------|----------|
| 0.00092  | 0.00034  | 0        | 0.00287  | 0.00134  | 0        | 0       | 0        |
| 0        | 0        | 0.03477  | 0.01275  | 0        | 0        | 0       | 0        |
| 0        | 0        | 0.03477  | 0.01275  | 0        | 0        | 0       | 0        |
| 0        | 0        | 0        | 0        | 0        | 0        | 0       | 0        |
| 0        | 0.1859   | 0.38282  | 0.44152  | 0.00549  | 0        | 0       | 0        |
| 0        | 0.1859   | 0.3824   | 0.44152  | 0.00549  | 0        | 0       | 0        |
| 0        | 0.1853   | 0.37587  | 0.43903  | 0.00549  | 0        | 0       | 0        |
| 0        | 0        | 0.00153  | 0        | 0        | 0        | 0       | 0        |
| 0        | 0.0006   | 0.00501  | 0.00249  | 0        | 0        | 0       | 0        |
| 0        | 0        | 0.00041  | 0        | 0        | 0        | 0       | 0        |
| 0        | 0        | 0.00041  | 0        | 0        | 0        | 0       | 0        |
| 0        | 0        | 0        | 0        | 0        | 0        | 0       | 0        |
| 0.02694  | 0.01026  | 0.02265  | 0.19379  | 0.00133  | 0.43564  | 0.5992  | 0.01167  |
| 0.02694  | 0.01026  | 0.02265  | 0.19379  | 0.00133  | 0.43564  | 0.5992  | 0.01167  |
| 0        | 0        | 0        | 0        | 0        | 0        | 0       | 0        |
| 0        | 0        | 0        | 0        | 0        | 0        | 0       | 0        |
| 0        | 0        | 0        | 0        | 0        | 0        | 0       | 0        |
| 0        | 0        | 0        | 0        | 0        | 0        | 0       | 0        |
| 0.02558  | 0.01009  | 0.02045  | 0.17613  | 0.00133  | 0.39885  | 0.54314 | 0.01075  |
| 0.02558  | 0.01009  | 0.02045  | 0.17613  | 0.00133  | 0.39885  | 0.54314 | 0.01075  |
| 0        | 0        | 0        | 0        | 0        | 0        | 0       | 0        |
| 0        | 0        | 0        | 0        | 0        | 0        | 0       | 0        |
| 0.00136  | 0.00017  | 0.0022   | 0.01766  | 0        | 0.03679  | 0.05607 | 0.00092  |
| 0.00136  | 0.00017  | 0.0022   | 0.01766  | 0        | 0.03679  | 0.05607 | 0.00092  |
| 0        | 0        | 0        | 0        | 0        | 0        | 0       | 0        |
| 0        | 0        | 0        | 0        | 0        | 0        | 0       | 0        |
| 45.78106 | 47.03871 | 75.51641 | 66.54853 | 74.3095  | 74.38019 | 9.53912 | 74.47275 |
| 0        | 0        | 0        | 0.00068  | 0        | 0        | 0       | 0        |
| 0        | 0        | 0        | 0.00068  | 0        | 0        | 0       | 0        |
| 0        | 0        | 0        | 0.00068  | 0        | 0        | 0       | 0        |
| 0        | 0        | 0        | 0.00068  | 0        | 0        | 0       | 0        |
| 0        | 0        | 0        | 0.00068  | 0        | 0        | 0       | 0        |
| 45.78106 | 47.03871 | 75.51641 | 66.54785 | 74.3095  | 74.38019 | 9.53912 | 74.47275 |
| 45.78106 | 47.03871 | 75.51641 | 66.54785 | 74.3095  | 74.38019 | 9.53912 | 74.47275 |
| 37.67776 | 43.65985 | 64.73291 | 35.83918 | 70.51413 | 70.15312 | 8.91578 | 72.81032 |

|          |          |          |          |          |          |         |          |
|----------|----------|----------|----------|----------|----------|---------|----------|
| 37.67776 | 43.65985 | 64.73291 | 35.83918 | 70.51413 | 70.15312 | 8.91578 | 72.81032 |
| 2.149    | 0.78539  | 9.85985  | 3.91051  | 3.1756   | 8.63981  | 0.01044 | 0.7105   |
| 0        | 0        | 0.00005  | 0        | 0        | 0.10827  | 0       | 0.0003   |
| 0        | 0        | 0        | 0        | 0        | 0        | 0       | 0        |
| 0.00027  | 0.00108  | 28.31782 | 22.0599  | 25.00863 | 0.01753  | 0.00114 | 0.00039  |
| 0        | 0        | 0        | 0        | 0        | 0        | 0       | 0        |
| 0        | 0        | 0        | 0        | 0        | 0        | 0       | 0        |
| 0        | 0        | 0        | 0        | 0        | 0        | 0       | 0        |
| 0        | 0        | 0        | 0        | 0        | 0        | 0       | 0        |
| 0.24251  | 0.02725  | 0        | 0        | 0        | 0.01803  | 5.04987 | 0.00652  |
| 0        | 0        | 0        | 0        | 0        | 0        | 0       | 0        |
| 0        | 0        | 0        | 0        | 0        | 0        | 0       | 0        |
| 0        | 0        | 0.00154  | 0.00306  | 0        | 0.00306  | 0       | 0        |
| 0.30108  | 0.65188  | 0.05842  | 0.16722  | 0.20647  | 0.58813  | 0.03801 | 3.75408  |
| 0.00049  | 0        | 13.91664 | 4.79767  | 34.27655 | 0        | 0       | 0        |
| 0        | 0        | 0.36644  | 0.42147  | 0.11936  | 0        | 0       | 0        |
| 0        | 0        | 0        | 0        | 0        | 0        | 0       | 0        |
| 0        | 0        | 0        | 0        | 0        | 0        | 0       | 0        |
| 0.63681  | 2.89672  | 6.78916  | 2.0138   | 1.20965  | 0        | 0       | 0.00012  |
| 9.18465  | 3.76019  | 0.71991  | 1.30477  | 1.10977  | 1.72649  | 0.57508 | 0.6861   |
| 1.02793  | 11.68619 | 1.47918  | 0.69824  | 2.40853  | 8.60275  | 0.25266 | 13.47783 |
| 21.86552 | 22.89445 | 0.00313  | 0.003    | 0.01693  | 48.8919  | 2.73479 | 49.51087 |
| 2.2695   | 0.95669  | 3.22076  | 0.45953  | 2.98265  | 1.55714  | 0.25378 | 4.66362  |
| 0        | 0        | 0        | 0        | 0        | 0        | 0       | 0        |
| 0        | 0        | 0        | 0        | 0        | 0        | 0       | 0        |
| 0        | 0        | 0        | 0        | 0        | 0        | 0       | 0        |
| 0        | 0        | 0        | 0        | 0        | 0        | 0       | 0        |
| 0        | 0        | 0        | 0        | 0        | 0        | 0       | 0        |
| 0        | 0        | 0        | 0        | 0        | 0        | 0       | 0        |
| 0        | 0        | 0.84888  | 3.84677  | 0.02576  | 0        | 0       | 0        |
| 0        | 0        | 0.52342  | 0.82778  | 0.00946  | 0        | 0       | 0        |
| 0        | 0        | 0.23957  | 0.28062  | 0.00136  | 0        | 0       | 0        |
| 0        | 0        | 0.28385  | 0.54715  | 0.0081   | 0        | 0       | 0        |
| 0        | 0        | 0.32546  | 3.01899  | 0.0163   | 0        | 0       | 0        |
| 0        | 0        | 0        | 0        | 0        | 0        | 0       | 0        |

|         |         |         |          |         |         |         |         |
|---------|---------|---------|----------|---------|---------|---------|---------|
| 0       | 0       | 0.32546 | 3.01899  | 0.0163  | 0       | 0       | 0       |
| 0       | 0       | 0       | 0        | 0       | 0       | 0       | 0       |
| 0       | 0       | 0       | 0        | 0       | 0       | 0       | 0       |
| 0       | 0       | 0       | 0        | 0       | 0       | 0       | 0       |
| 0       | 0       | 0       | 0        | 0       | 0       | 0       | 0       |
| 0       | 0       | 0       | 0        | 0       | 0       | 0       | 0       |
| 0       | 0       | 0       | 0        | 0       | 0       | 0       | 0       |
| 0       | 0       | 0       | 0        | 0       | 0       | 0       | 0       |
| 0.023   | 0       | 0.07004 | 0.53759  | 0       | 0.51763 | 0.12407 | 0.00146 |
| 0.00205 | 0       | 0       | 0        | 0       | 0       | 0       | 0       |
| 0.00205 | 0       | 0       | 0        | 0       | 0       | 0       | 0       |
| 0       | 0       | 0       | 0        | 0       | 0       | 0       | 0       |
| 0       | 0       | 0       | 0        | 0       | 0       | 0       | 0       |
| 0       | 0       | 0       | 0        | 0       | 0       | 0       | 0       |
| 0.02095 | 0       | 0.07004 | 0.53759  | 0       | 0.51763 | 0.12407 | 0.00146 |
| 0       | 0       | 0.06923 | 0.46288  | 0       | 0.48865 | 0.12407 | 0.00146 |
| 0.00137 | 0       | 0       | 0        | 0       | 0       | 0       | 0       |
| 0       | 0       | 0       | 0        | 0       | 0.01578 | 0       | 0       |
| 0       | 0       | 0       | 0        | 0       | 0       | 0       | 0       |
| 0       | 0       | 0       | 0        | 0       | 0       | 0       | 0       |
| 0       | 0       | 0       | 0        | 0       | 0       | 0       | 0       |
| 0       | 0       | 0       | 0        | 0       | 0       | 0       | 0       |
| 0       | 0       | 0       | 0        | 0       | 0       | 0       | 0       |
| 0       | 0       | 0       | 0        | 0       | 0       | 0       | 0       |
| 0       | 0       | 0       | 0        | 0       | 0       | 0       | 0       |
| 0       | 0       | 0       | 0        | 0       | 0       | 0       | 0       |
| 0       | 0       | 0       | 0        | 0       | 0       | 0       | 0       |
| 0       | 0       | 0       | 0        | 0       | 0       | 0       | 0       |
| 0.01958 | 0       | 0       | 0        | 0       | 0       | 0       | 0       |
| 0       | 0       | 0       | 0        | 0       | 0       | 0       | 0       |
| 0       | 0       | 0       | 0        | 0       | 0       | 0       | 0       |
| 0       | 0       | 0       | 0        | 0       | 0       | 0       | 0       |
| 0       | 0       | 0       | 0        | 0       | 0       | 0       | 0       |
| 0       | 0       | 0       | 0        | 0       | 0       | 0       | 0       |
| 0       | 0       | 0       | 0        | 0       | 0       | 0       | 0       |
| 0       | 0       | 0.00081 | 0.07471  | 0       | 0.0132  | 0       | 0       |
| 0       | 0.23726 | 6.72503 | 20.74238 | 0.37001 | 0       | 0       | 0.00021 |
| 0       | 0.23726 | 6.72503 | 20.74238 | 0.37001 | 0       | 0       | 0.00021 |

|          |          |          |          |          |          |          |          |
|----------|----------|----------|----------|----------|----------|----------|----------|
| 0        | 0        | 1.04804  | 13.13169 | 0.29655  | 0        | 0        | 0        |
| 0        | 0        | 0.01069  | 0.0338   | 0        | 0        | 0        | 0        |
| 0        | 0        | 0        | 0        | 0        | 0        | 0        | 0        |
| 0        | 0.23726  | 5.61924  | 7.41939  | 0.07345  | 0        | 0        | 0.00021  |
| 0        | 0        | 0.04706  | 0.15751  | 0        | 0        | 0        | 0        |
| 0        | 0        | 0        | 0        | 0        | 0        | 0        | 0        |
| 8.0803   | 3.14159  | 3.13955  | 5.58192  | 3.39961  | 3.70944  | 0.49927  | 1.66076  |
| 8.0803   | 3.14159  | 3.13955  | 5.58192  | 3.39961  | 3.70944  | 0.49927  | 1.66076  |
| 3.51147  | 1.59405  | 1.42923  | 2.81444  | 1.92789  | 3.70944  | 0.49927  | 1.66029  |
| 0        | 0        | 0.70727  | 0.90039  | 0.01845  | 0        | 0        | 0        |
| 0.5374   | 0.00248  | 0.00068  | 0.00102  | 0.00322  | 0        | 0        | 0        |
| 0        | 0        | 0        | 0        | 0        | 0        | 0        | 0        |
| 4.03144  | 1.54506  | 1.00238  | 1.86608  | 1.45005  | 0        | 0        | 0.00047  |
| 0        | 0        | 0        | 0        | 0        | 0        | 0        | 0        |
| 0        | 0        | 0        | 0        | 0        | 0        | 0        | 0        |
| 0        | 0        | 0        | 0        | 0        | 0        | 0        | 0        |
| 0        | 0        | 0        | 0        | 0        | 0        | 0        | 0        |
| 0        | 0        | 0        | 0        | 0        | 0        | 0        | 0        |
| 0        | 0        | 0        | 0        | 0        | 0        | 0        | 0        |
| 18.94166 | 13.96532 | 19.13772 | 28.27318 | 14.11741 | 17.83914 | 54.36645 | 17.80218 |
| 3.92148  | 0.34855  | 0.22273  | 0.07594  | 0.69815  | 0.13557  | 0.83264  | 0.30868  |
| 0.20093  | 0.04857  | 0.00119  | 0.00036  | 0.00974  | 0.00392  | 0        | 0.00657  |
| 0.20093  | 0.04857  | 0.00119  | 0.00036  | 0.00974  | 0.00392  | 0        | 0.00657  |
| 0.20093  | 0.04857  | 0.00119  | 0.00036  | 0.00974  | 0.00392  | 0        | 0.00657  |
| 0        | 0        | 0        | 0.00036  | 0        | 0        | 0        | 0        |
| 0.01263  | 0.00786  | 0        | 0        | 0        | 0.00124  | 0        | 0        |
| 0.13447  | 0.00727  | 0        | 0        | 0        | 0        | 0        | 0        |
| 0.05383  | 0.03343  | 0.00119  | 0        | 0.00974  | 0.00267  | 0        | 0.00657  |
| 3.72055  | 0.29999  | 0.22154  | 0.07557  | 0.68841  | 0.13166  | 0.83264  | 0.30212  |
| 0.09713  | 0.01625  | 0        | 0.00417  | 0        | 0        | 0        | 0.00038  |
| 0.09713  | 0.01625  | 0        | 0.00417  | 0        | 0        | 0        | 0.00038  |
| 0.03756  | 0.0023   | 0        | 0.00174  | 0        | 0        | 0        | 0.00028  |
| 0.05958  | 0.01395  | 0        | 0.00243  | 0        | 0        | 0        | 0.0001   |
| 0.00979  | 0.00029  | 0        | 0        | 0        | 0        | 0        | 0        |

|         |         |         |         |         |         |         |         |
|---------|---------|---------|---------|---------|---------|---------|---------|
| 0.00979 | 0.00029 | 0       | 0       | 0       | 0       | 0       | 0       |
| 0.00123 | 0       | 0       | 0       | 0       | 0       | 0       | 0       |
| 0.00856 | 0.00029 | 0       | 0       | 0       | 0       | 0       | 0       |
| 0.7414  | 0       | 0       | 0.02523 | 0       | 0       | 0.83264 | 0       |
| 0.7414  | 0       | 0       | 0.02523 | 0       | 0       | 0.83264 | 0       |
| 0       | 0       | 0       | 0       | 0       | 0       | 0       | 0       |
| 0.00595 | 0       | 0       | 0       | 0       | 0       | 0.7833  | 0       |
| 0       | 0       | 0       | 0       | 0       | 0       | 0       | 0       |
| 0.73545 | 0       | 0       | 0.02523 | 0       | 0       | 0.04934 | 0       |
| 0       | 0       | 0       | 0       | 0       | 0       | 0       | 0       |
| 0       | 0       | 0       | 0       | 0       | 0       | 0       | 0       |
| 0       | 0       | 0       | 0       | 0       | 0       | 0       | 0       |
| 0       | 0       | 0       | 0       | 0       | 0       | 0       | 0       |
| 0       | 0       | 0       | 0       | 0       | 0       | 0       | 0       |
| 0       | 0       | 0       | 0       | 0       | 0       | 0       | 0       |
| 0.03579 | 0       | 0.00418 | 0       | 0.03084 | 0       | 0       | 0       |
| 0.03579 | 0       | 0.00418 | 0       | 0.03084 | 0       | 0       | 0       |
| 0       | 0       | 0       | 0       | 0.01034 | 0       | 0       | 0       |
| 0       | 0       | 0       | 0       | 0.00762 | 0       | 0       | 0       |
| 0       | 0       | 0       | 0       | 0       | 0       | 0       | 0       |
| 0       | 0       | 0       | 0       | 0       | 0       | 0       | 0       |
| 0       | 0       | 0       | 0       | 0       | 0       | 0       | 0       |
| 0       | 0       | 0.00418 | 0       | 0.00868 | 0       | 0       | 0       |
| 0.03579 | 0       | 0       | 0       | 0       | 0       | 0       | 0       |
| 0       | 0       | 0       | 0       | 0       | 0       | 0       | 0       |
| 0       | 0       | 0       | 0       | 0.00421 | 0       | 0       | 0       |
| 0.00385 | 0       | 0       | 0       | 0       | 0       | 0       | 0       |
| 0.00076 | 0       | 0       | 0       | 0       | 0       | 0       | 0       |
| 0.00032 | 0       | 0       | 0       | 0       | 0       | 0       | 0       |
| 0.00044 | 0       | 0       | 0       | 0       | 0       | 0       | 0       |
| 0.00309 | 0       | 0       | 0       | 0       | 0       | 0       | 0       |
| 0       | 0       | 0       | 0       | 0       | 0       | 0       | 0       |
| 0       | 0       | 0       | 0       | 0       | 0       | 0       | 0       |
| 0.00309 | 0       | 0       | 0       | 0       | 0       | 0       | 0       |
| 2.83258 | 0.28345 | 0.21736 | 0.04617 | 0.65757 | 0.13166 | 0       | 0.30174 |



|         |         |         |         |         |         |          |         |
|---------|---------|---------|---------|---------|---------|----------|---------|
| 0       | 0       | 0       | 0       | 0       | 0       | 0        | 0       |
| 0       | 0       | 0       | 0       | 0       | 0       | 0        | 0       |
| 0.71177 | 9.16752 | 0.67858 | 5.75836 | 0.04339 | 0.60353 | 26.20134 | 0.3946  |
| 0       | 0       | 0       | 0       | 0       | 0       | 0        | 0       |
| 0       | 0       | 0       | 0       | 0       | 0       | 0        | 0       |
| 0.60159 | 9.16353 | 0.48727 | 0.33318 | 0.03573 | 0.09905 | 0.15282  | 0.38858 |
| 0       | 0       | 0       | 0       | 0       | 0       | 0        | 0       |
| 0.48713 | 0       | 0       | 0       | 0       | 0.09905 | 0.15282  | 0.06548 |
| 0       | 0       | 0       | 0       | 0       | 0       | 0        | 0       |
| 0       | 0       | 0       | 0       | 0.02111 | 0       | 0        | 0       |
| 0       | 8.32245 | 0       | 0       | 0       | 0       | 0        | 0.00048 |
| 0       | 0       | 0       | 0       | 0       | 0       | 0        | 0       |
| 0       | 0.00599 | 0       | 0       | 0.00488 | 0       | 0        | 0.05948 |
| 0.11446 | 0.83355 | 0       | 0       | 0.00802 | 0       | 0        | 0.26313 |
| 0       | 0       | 0.00566 | 0       | 0       | 0       | 0        | 0       |
| 0       | 0.00155 | 0.15703 | 0.21287 | 0       | 0       | 0        | 0       |
| 0       | 0       | 0       | 0       | 0       | 0       | 0        | 0       |
| 0       | 0       | 0       | 0       | 0       | 0       | 0        | 0       |
| 0       | 0       | 0.32458 | 0.12031 | 0.00172 | 0       | 0        | 0       |
| 0       | 0       | 0       | 0       | 0       | 0       | 0        | 0       |
| 0       | 0       | 0       | 0       | 0       | 0       | 0        | 0       |
| 0.11018 | 0.004   | 0.19131 | 5.42519 | 0.00766 | 0.50447 | 26.04851 | 0.00603 |
| 0       | 0       | 0       | 0       | 0       | 0       | 0        | 0       |
| 0.11018 | 0.004   | 0.19131 | 5.42519 | 0.00766 | 0.50447 | 26.04851 | 0.00603 |
| 0       | 0       | 0       | 0       | 0       | 0       | 0        | 0       |
| 0       | 0       | 0       | 0       | 0       | 0       | 0        | 0       |
| 0.0021  | 0.0217  | 0       | 0       | 0.00201 | 0       | 0        | 0       |
| 0.0021  | 0.01474 | 0       | 0       | 0.00094 | 0       | 0        | 0       |
| 0.0021  | 0.0008  | 0       | 0       | 0       | 0       | 0        | 0       |
| 0       | 0       | 0       | 0       | 0       | 0       | 0        | 0       |
| 0       | 0       | 0       | 0       | 0       | 0       | 0        | 0       |
| 0       | 0.01394 | 0       | 0       | 0.00094 | 0       | 0        | 0       |
| 0       | 0.00696 | 0       | 0       | 0.00107 | 0       | 0        | 0       |
| 0       | 0.00696 | 0       | 0       | 0.00107 | 0       | 0        | 0       |
| 0       | 0       | 0.02229 | 0.00932 | 0       | 0       | 0        | 0       |

|         |         |          |          |         |         |          |         |
|---------|---------|----------|----------|---------|---------|----------|---------|
| 0       | 0       | 0        | 0.00242  | 0       | 0       | 0        | 0       |
| 0       | 0       | 0        | 0.00242  | 0       | 0       | 0        | 0       |
| 0       | 0       | 0        | 0        | 0       | 0       | 0        | 0       |
| 0       | 0       | 0        | 0        | 0       | 0       | 0        | 0       |
| 0       | 0       | 0.02229  | 0.0069   | 0       | 0       | 0        | 0       |
| 0       | 0       | 0.02229  | 0.0069   | 0       | 0       | 0        | 0       |
| 0       | 0       | 0        | 0        | 0       | 0       | 0        | 0       |
| 0       | 0       | 0        | 0        | 0       | 0       | 0        | 0       |
| 0       | 1.44057 | 0.82252  | 0.08648  | 0.05182 | 0.22206 | 0.11286  | 0       |
| 0       | 0       | 0        | 0        | 0       | 0       | 0        | 0       |
| 0       | 0       | 0        | 0        | 0       | 0       | 0        | 0       |
| 0       | 0       | 0        | 0        | 0       | 0       | 0        | 0       |
| 0       | 0       | 0        | 0        | 0       | 0       | 0        | 0       |
| 0       | 1.44057 | 0.82252  | 0.08648  | 0.05182 | 0.22206 | 0.11286  | 0       |
| 0       | 0.00046 | 0        | 0        | 0       | 0.09494 | 0.11286  | 0       |
| 0       | 0       | 0.00521  | 0        | 0       | 0.01401 | 0        | 0       |
| 0       | 1.44011 | 0.60308  | 0.01646  | 0       | 0       | 0        | 0       |
| 0       | 0       | 0.1405   | 0.07002  | 0.03345 | 0       | 0        | 0       |
| 0       | 0       | 0        | 0        | 0       | 0       | 0        | 0       |
| 0       | 0       | 0        | 0        | 0       | 0       | 0        | 0       |
| 0       | 0       | 0        | 0        | 0       | 0       | 0        | 0       |
| 0       | 0       | 0        | 0        | 0       | 0       | 0        | 0       |
| 0       | 0       | 0.06972  | 0        | 0       | 0       | 0        | 0       |
| 0       | 0       | 0.00354  | 0        | 0       | 0       | 0        | 0       |
| 0       | 0       | 0        | 0        | 0       | 0       | 0        | 0       |
| 0       | 0       | 0.00047  | 0        | 0.01838 | 0.11311 | 0        | 0       |
| 0       | 0       | 0        | 0        | 0       | 0       | 0        | 0       |
| 0       | 0       | 0        | 0        | 0       | 0       | 0        | 0       |
| 4.14342 | 1.38451 | 12.18247 | 12.42596 | 9.87762 | 8.09097 | 18.13306 | 8.63438 |
| 0       | 0.00246 | 0.33919  | 0.00634  | 0.06258 | 1.02945 | 0        | 0.00028 |
| 0       | 0.00246 | 0        | 0        | 0       | 0       | 0        | 0.00028 |
| 0       | 0       | 0.33919  | 0.00634  | 0.06258 | 1.02945 | 0        | 0       |
| 0.11019 | 0       | 0.02874  | 0.08995  | 0.01    | 0.24995 | 2.4984   | 0       |
| 0.11019 | 0       | 0.02874  | 0.08995  | 0.01    | 0.24995 | 2.4984   | 0       |
| 2.95361 | 0.3488  | 0.79161  | 1.19133  | 1.94474 | 1.08436 | 0.02688  | 7.33579 |



|         |         |         |         |         |         |          |         |
|---------|---------|---------|---------|---------|---------|----------|---------|
| 0       | 0       | 0       | 0       | 0.00227 | 0.00009 | 0        | 0       |
| 0       | 0.00078 | 0.10413 | 0.0414  | 0.00614 | 0.02378 | 0        | 0.00475 |
| 0       | 0       | 0       | 0.00262 | 0       | 0       | 0        | 0       |
| 0       | 0       | 0       | 0       | 0       | 0       | 0        | 0       |
| 0       | 0.00859 | 0.00028 | 0       | 0.00074 | 0       | 0        | 0       |
| 0.00188 | 0.02012 | 0.00364 | 0       | 0.00529 | 0.07423 | 0        | 0.24726 |
| 0       | 0.00579 | 0.19925 | 0.01801 | 0.63892 | 0.23901 | 0        | 0.51104 |
| 2.95172 | 0.2496  | 0.48432 | 1.1293  | 1.29138 | 0.58608 | 0.02688  | 4.24119 |
| 0       | 0.06392 | 0       | 0       | 0       | 0.16116 | 0        | 2.33155 |
| 0       | 0       | 0       | 0       | 0       | 0       | 0        | 0       |
| 0       | 0       | 0       | 0       | 0       | 0       | 0        | 0       |
| 0       | 0       | 0       | 0       | 0       | 0       | 0        | 0       |
| 0       | 0       | 0       | 0       | 0       | 0       | 0        | 0       |
| 0       | 0       | 0       | 0       | 0       | 0       | 0        | 0       |
| 0.14036 | 0.23799 | 0.13995 | 0.00025 | 0       | 0       | 0        | 0       |
| 0       | 0       | 0       | 0       | 0       | 0       | 0        | 0       |
| 0.14036 | 0.23052 | 0.13995 | 0.00025 | 0       | 0       | 0        | 0       |
| 0       | 0.00747 | 0       | 0       | 0       | 0       | 0        | 0       |
| 0.00077 | 0       | 0.04516 | 5.83676 | 0.00611 | 0       | 0        | 0       |
| 0       | 0       | 0       | 0       | 0       | 0       | 0        | 0       |
| 0.00077 | 0       | 0.04516 | 5.83676 | 0.00611 | 0       | 0        | 0       |
| 0.0003  | 0       | 0       | 0       | 0       | 0       | 0        | 0       |
| 0.0003  | 0       | 0       | 0       | 0       | 0       | 0        | 0       |
| 0       | 0       | 0.41054 | 0.02744 | 0       | 0.69188 | 0        | 0.8098  |
| 0       | 0       | 0.41054 | 0.02744 | 0       | 0.69188 | 0        | 0.8098  |
| 0       | 0.00116 | 0       | 0       | 0       | 0       | 0        | 0       |
| 0       | 0.00116 | 0       | 0       | 0       | 0       | 0        | 0       |
| 0.93821 | 0.34916 | 0.4385  | 4.85944 | 0.25109 | 1.60541 | 14.31433 | 0.3976  |
| 0.14825 | 0.02449 | 0.00412 | 0.01031 | 0.0007  | 0.00674 | 0.0143   | 0       |
| 0       | 0.00308 | 0       | 0       | 0       | 0.12346 | 0        | 0.00584 |
| 0.16158 | 0.14049 | 0.2296  | 2.98663 | 0.2266  | 0.60612 | 1.98252  | 0.36334 |
| 0.02439 | 0.03003 | 0.05131 | 0.17705 | 0.00405 | 0.24491 | 0.22727  | 0.02312 |
| 0       | 0.06363 | 0       | 0.41385 | 0.00181 | 0       | 0        | 0       |
| 0       | 0       | 0       | 0       | 0       | 0       | 0        | 0       |
| 0.00622 | 0.04911 | 0.05971 | 0.03204 | 0.00145 | 0.01031 | 0        | 0.0001  |

|         |         |         |         |         |         |          |         |
|---------|---------|---------|---------|---------|---------|----------|---------|
| 0       | 0       | 0       | 0       | 0       | 0       | 0        | 0       |
| 0       | 0       | 0.00048 | 0.00028 | 0       | 0.01565 | 0        | 0       |
| 0.59777 | 0.03832 | 0.09329 | 1.23928 | 0.01648 | 0.59822 | 12.09024 | 0.0052  |
| 0       | 0       | 0       | 0       | 0       | 0       | 0        | 0       |
| 0       | 0       | 0       | 0       | 0       | 0       | 0        | 0       |
| 0       | 0       | 3.15501 | 0.05855 | 0       | 0       | 0        | 0       |
| 0       | 0.30558 | 0.1245  | 0.1229  | 0.01315 | 0       | 0        | 0       |
| 0       | 0.30486 | 0       | 0       | 0       | 0       | 0        | 0       |
| 0       | 0       | 0.1245  | 0.1229  | 0.01315 | 0       | 0        | 0       |
| 0       | 0.00072 | 0       | 0       | 0       | 0       | 0        | 0       |
| 0       | 0       | 3.15501 | 0.05855 | 0       | 0       | 0        | 0       |
| 0       | 0       | 0       | 0       | 0       | 0       | 0        | 0       |
| 0       | 0       | 0       | 0       | 0       | 0       | 0        | 0       |
| 0       | 0       | 0       | 0       | 0.00207 | 0       | 0        | 0       |
| 0       | 0       | 0       | 0       | 0.00207 | 0       | 0        | 0       |
| 0       | 0.01528 | 0       | 0       | 0.00325 | 0       | 0        | 0       |
| 0       | 0.00959 | 0       | 0       | 0.00314 | 0       | 0        | 0       |
| 0       | 0.00569 | 0       | 0       | 0.0001  | 0       | 0        | 0       |
| 0       | 0       | 0       | 0       | 0       | 0       | 0        | 0       |
| 0       | 0       | 0       | 0       | 0       | 0       | 0        | 0       |
| 0       | 0.12224 | 6.67033 | 0.19374 | 7.58149 | 2.05196 | 0        | 0       |
| 0       | 0.11981 | 0.47342 | 0.01299 | 0.08287 | 0       | 0        | 0       |
| 0       | 0.00244 | 0.01126 | 0       | 0       | 0       | 0        | 0       |
| 0       | 0       | 0.44141 | 0.00191 | 0       | 0.89762 | 0        | 0       |
| 0       | 0       | 5.74424 | 0.17884 | 7.49862 | 1.15434 | 0        | 0       |
| 0       | 0       | 0       | 0       | 0       | 0       | 0        | 0       |
| 0       | 0       | 0       | 0       | 0       | 0       | 0        | 0       |
| 0       | 0       | 0.00378 | 0.01879 | 0.00016 | 0.66562 | 1.09975  | 0.05298 |
| 0       | 0       | 0.00378 | 0.01879 | 0.00016 | 0.66562 | 1.09975  | 0.05298 |
| 0       | 0       | 0       | 0       | 0       | 0       | 0        | 0       |
| 0       | 0       | 0       | 0       | 0       | 0       | 0        | 0       |
| 0       | 0.00184 | 0       | 0       | 0.00241 | 0       | 0        | 0       |
| 0       | 0.00184 | 0       | 0       | 0.00241 | 0       | 0        | 0       |
| 0       | 0       | 0.03516 | 0.02047 | 0.00057 | 0.71235 | 0.19369  | 0.03794 |
| 0       | 0       | 0.03516 | 0.02047 | 0.00057 | 0.71235 | 0.19369  | 0.03794 |

|         |         |         |         |         |         |         |         |
|---------|---------|---------|---------|---------|---------|---------|---------|
| 0       | 0       | 0       | 0       | 0       | 0       | 0       | 0       |
| 0       | 0       | 0       | 0       | 0       | 0       | 0       | 0       |
| 0       | 0       | 0       | 0       | 0       | 0       | 0       | 0       |
| 0       | 0       | 0       | 0       | 0       | 0       | 0       | 0       |
| 0.00718 | 0.35925 | 0.02612 | 0.02312 | 0.00164 | 0.6285  | 0       | 0.14294 |
| 0.00133 | 0       | 0       | 0       | 0       | 0       | 0       | 0       |
| 0.00133 | 0       | 0       | 0       | 0       | 0       | 0       | 0       |
| 0       | 0.00088 | 0       | 0       | 0       | 0       | 0       | 0       |
| 0       | 0.00088 | 0       | 0       | 0       | 0       | 0       | 0       |
| 0       | 0.01268 | 0.02588 | 0.02013 | 0       | 0.6285  | 0       | 0.14294 |
| 0       | 0.01268 | 0.02588 | 0.02013 | 0       | 0.6285  | 0       | 0.14294 |
| 0       | 0.22377 | 0       | 0       | 0       | 0       | 0       | 0       |
| 0       | 0.22377 | 0       | 0       | 0       | 0       | 0       | 0       |
| 0       | 0.11512 | 0       | 0       | 0       | 0       | 0       | 0       |
| 0       | 0.11512 | 0       | 0       | 0       | 0       | 0       | 0       |
| 0       | 0       | 0       | 0.00298 | 0       | 0       | 0       | 0       |
| 0       | 0       | 0       | 0       | 0       | 0       | 0       | 0       |
| 0       | 0       | 0       | 0.00298 | 0       | 0       | 0       | 0       |
| 0.00366 | 0.00232 | 0.00024 | 0       | 0.00164 | 0       | 0       | 0       |
| 0.00366 | 0.00232 | 0.00024 | 0       | 0.00164 | 0       | 0       | 0       |
| 0.00219 | 0.00448 | 0       | 0       | 0       | 0       | 0       | 0       |
| 0.00219 | 0.00448 | 0       | 0       | 0       | 0       | 0       | 0       |
| 3.16821 | 0.12298 | 3.94581 | 5.57667 | 0.40712 | 5.41164 | 4.63385 | 3.97833 |
| 0       | 0       | 0.09763 | 0.09096 | 0.16648 | 0.22391 | 0.03648 | 0       |
| 0       | 0       | 0.09763 | 0.09096 | 0.16648 | 0.22391 | 0.03648 | 0       |
| 0       | 0       | 0       | 0       | 0       | 0       | 0       | 0       |
| 0       | 0       | 0       | 0       | 0       | 0       | 0       | 0       |
| 0       | 0       | 0       | 0       | 0       | 0       | 0       | 0       |
| 0       | 0       | 0       | 0       | 0       | 0       | 0       | 0       |
| 0.43127 | 0.01417 | 0.04506 | 0.09202 | 0       | 0.20343 | 0.04197 | 0       |
| 0.43127 | 0.01417 | 0.04506 | 0.09202 | 0       | 0.20343 | 0.04197 | 0       |
| 0       | 0       | 1.30967 | 3.5637  | 0.14707 | 0.54951 | 2.78882 | 3.23315 |
| 0       | 0       | 1.30967 | 3.5637  | 0.14707 | 0.54951 | 2.78882 | 3.23315 |
| 1.64331 | 0.03395 | 2.39449 | 1.26947 | 0.0894  | 3.72462 | 0.07719 | 0.73077 |
| 1.64331 | 0.03395 | 2.39449 | 1.26947 | 0.0894  | 3.72462 | 0.07719 | 0.73077 |

|         |         |         |         |         |         |         |         |
|---------|---------|---------|---------|---------|---------|---------|---------|
| 0       | 0       | 0       | 0       | 0       | 0       | 0       | 0       |
| 0       | 0       | 0.01153 | 0.00914 | 0       | 0       | 0       | 0       |
| 0       | 0       | 0.01153 | 0.00914 | 0       | 0       | 0       | 0       |
| 0       | 0       | 0       | 0       | 0       | 0       | 0       | 0       |
| 0       | 0       | 0       | 0       | 0       | 0       | 0       | 0       |
| 0       | 0       | 0       | 0       | 0       | 0       | 0       | 0       |
| 0       | 0       | 0       | 0       | 0       | 0       | 0       | 0       |
| 0       | 0       | 0       | 0       | 0       | 0       | 0       | 0       |
| 0       | 0       | 0       | 0       | 0       | 0       | 0       | 0       |
| 0       | 0       | 0       | 0       | 0       | 0       | 0       | 0       |
| 0       | 0       | 0       | 0       | 0       | 0       | 0       | 0       |
| 0       | 0       | 0       | 0       | 0       | 0       | 0       | 0       |
| 0       | 0       | 0       | 0       | 0       | 0       | 0       | 0       |
| 0       | 0.05986 | 0       | 0       | 0       | 0       | 0       | 0       |
| 0       | 0       | 0       | 0       | 0       | 0       | 0       | 0       |
| 0       | 0.05986 | 0       | 0       | 0       | 0       | 0       | 0       |
| 0       | 0       | 0       | 0       | 0       | 0       | 0       | 0       |
| 0       | 0       | 0       | 0       | 0       | 0       | 0       | 0       |
| 0       | 0       | 0       | 0       | 0       | 0       | 0       | 0       |
| 0       | 0       | 0       | 0       | 0       | 0       | 0       | 0       |
| 0       | 0       | 0       | 0       | 0       | 0       | 0       | 0       |
| 1.09363 | 0.015   | 0.08743 | 0.55138 | 0.00417 | 0.71017 | 1.6894  | 0.01441 |
| 1.09363 | 0.015   | 0.08743 | 0.55138 | 0.00417 | 0.71017 | 1.6894  | 0.01441 |
| 0.31131 | 0.23491 | 0.18389 | 3.39629 | 0.24161 | 1.0497  | 4.37773 | 2.6154  |
| 0.31131 | 0.23491 | 0.18389 | 3.39629 | 0.24161 | 1.0497  | 4.37773 | 2.6154  |
| 0.31131 | 0.23491 | 0.18389 | 3.39629 | 0.24161 | 1.0497  | 4.37773 | 2.6154  |
| 0       | 0       | 0.00508 | 0       | 0       | 0.02075 | 0       | 0       |
| 0       | 0       | 0.00508 | 0       | 0       | 0.02075 | 0       | 0       |
| 0       | 0       | 0       | 0       | 0       | 0       | 0       | 0       |
| 0       | 0       | 0       | 0       | 0       | 0       | 0       | 0       |
| 0       | 0       | 0.00178 | 0       | 0.16341 | 0       | 0       | 0       |
| 0       | 0       | 0.00178 | 0       | 0.16341 | 0       | 0       | 0       |
| 0       | 0       | 0.00828 | 2.18713 | 0       | 0       | 0       | 0       |
| 0       | 0       | 0.00828 | 2.18713 | 0       | 0       | 0       | 0       |
| 0.00942 | 0.00105 | 0       | 0       | 0       | 0.17836 | 0.02923 | 0       |
| 0.00942 | 0.00105 | 0       | 0       | 0       | 0.17836 | 0.02923 | 0       |

|         |         |         |         |         |         |         |         |
|---------|---------|---------|---------|---------|---------|---------|---------|
| 0       | 0       | 0       | 0       | 0       | 0       | 0       | 0       |
| 0       | 0       | 0       | 0       | 0       | 0       | 0       | 0       |
| 0.29946 | 0.22858 | 0.14482 | 1.19216 | 0.07466 | 0.85059 | 4.3485  | 2.61437 |
| 0.07763 | 0.01172 | 0.14482 | 1.18873 | 0.03122 | 0.39167 | 2.85941 | 1.05277 |
| 0.01384 | 0       | 0       | 0       | 0       | 0       | 0       | 0       |
| 0.20799 | 0.21686 | 0       | 0.00343 | 0.04344 | 0.45893 | 1.48909 | 1.56161 |
| 0       | 0       | 0       | 0       | 0       | 0       | 0       | 0       |
| 0       | 0       | 0       | 0       | 0       | 0       | 0       | 0       |
| 0       | 0       | 0       | 0       | 0       | 0       | 0       | 0       |
| 0       | 0       | 0       | 0       | 0       | 0       | 0       | 0       |
| 0       | 0       | 0       | 0       | 0       | 0       | 0       | 0       |
| 0       | 0       | 0       | 0       | 0       | 0       | 0       | 0       |
| 0       | 0       | 0       | 0       | 0       | 0       | 0       | 0       |
| 0       | 0       | 0       | 0       | 0       | 0       | 0       | 0       |
| 0       | 0       | 0       | 0       | 0       | 0       | 0       | 0       |
| 0       | 0       | 0.02392 | 0.01699 | 0       | 0       | 0       | 0       |
| 0       | 0       | 0.02392 | 0.01699 | 0       | 0       | 0       | 0       |
| 0       | 0       | 0       | 0       | 0       | 0       | 0       | 0       |
| 0       | 0       | 0       | 0       | 0       | 0       | 0       | 0       |
| 0.00243 | 0.00528 | 0       | 0       | 0       | 0       | 0       | 0       |
| 0.00243 | 0.00528 | 0       | 0       | 0       | 0       | 0       | 0       |
| 0       | 0       | 0       | 0       | 0.00354 | 0       | 0       | 0.00103 |
| 0       | 0       | 0       | 0       | 0.00354 | 0       | 0       | 0.00103 |
| 0       | 0       | 0.12456 | 0.44546 | 0       | 0       | 0       | 0       |
| 0       | 0       | 0.12456 | 0.44546 | 0       | 0       | 0       | 0       |
| 0       | 0       | 0.12456 | 0.44546 | 0       | 0       | 0       | 0       |
| 0       | 0       | 0.12456 | 0.44546 | 0       | 0       | 0       | 0       |
| 0       | 0       | 0       | 0       | 0       | 0       | 0       | 0       |
| 0       | 0       | 0       | 0       | 0       | 0       | 0       | 0       |
| 0       | 0       | 0       | 0       | 0       | 0       | 0       | 0       |
| 0       | 0       | 0       | 0       | 0       | 0       | 0       | 0       |
| 0       | 0       | 0       | 0       | 0       | 0       | 0       | 0       |
| 0       | 0       | 0       | 0       | 0       | 0       | 0       | 0       |
| 0       | 0       | 0.12456 | 0.44546 | 0       | 0       | 0       | 0       |
| 0       | 0       | 0       | 0       | 0       | 0       | 0       | 0       |
| 0       | 0       | 0       | 0       | 0       | 0       | 0       | 0       |
| 6.67186 | 0.88207 | 0.92873 | 0.46659 | 2.79394 | 1.69633 | 0.07208 | 1.72783 |

|         |         |         |         |         |         |         |         |
|---------|---------|---------|---------|---------|---------|---------|---------|
| 1.65667 | 0.7293  | 0.3782  | 0.21779 | 2.4104  | 1.67035 | 0.05507 | 1.6753  |
| 1.65667 | 0.7293  | 0.3782  | 0.21779 | 2.4104  | 1.67035 | 0.05507 | 1.6753  |
| 0       | 0.00031 | 0       | 0       | 0       | 0       | 0       | 0       |
| 0       | 0       | 0       | 0       | 0       | 0       | 0       | 0       |
| 0       | 0.00031 | 0       | 0       | 0       | 0       | 0       | 0       |
| 1.65667 | 0.72899 | 0.3782  | 0.21779 | 2.4104  | 1.67035 | 0.05507 | 1.6753  |
| 1.65667 | 0.72899 | 0       | 0.00565 | 0.00462 | 1.67035 | 0.05507 | 1.6753  |
| 0       | 0       | 0.3782  | 0.21214 | 2.40578 | 0       | 0       | 0       |
| 0.00818 | 0.00617 | 0.24011 | 0.00485 | 0       | 0       | 0       | 0       |
| 0.00818 | 0.00617 | 0.24011 | 0.00485 | 0       | 0       | 0       | 0       |
| 0       | 0       | 0       | 0       | 0       | 0       | 0       | 0       |
| 0       | 0       | 0       | 0       | 0       | 0       | 0       | 0       |
| 0       | 0       | 0       | 0       | 0       | 0       | 0       | 0       |
| 0       | 0       | 0.24011 | 0.00485 | 0       | 0       | 0       | 0       |
| 0       | 0       | 0.24011 | 0.00485 | 0       | 0       | 0       | 0       |
| 0.00818 | 0.00617 | 0       | 0       | 0       | 0       | 0       | 0       |
| 0.00785 | 0       | 0       | 0       | 0       | 0       | 0       | 0       |
| 0.00012 | 0.00617 | 0       | 0       | 0       | 0       | 0       | 0       |
| 0.00021 | 0       | 0       | 0       | 0       | 0       | 0       | 0       |
| 0       | 0       | 0       | 0       | 0       | 0       | 0       | 0       |
| 5.00701 | 0.1466  | 0.31043 | 0.24395 | 0.38354 | 0.02599 | 0.017   | 0.05253 |
| 5.00701 | 0.1466  | 0.31043 | 0.24395 | 0.38354 | 0.02599 | 0.017   | 0.05253 |
| 0       | 0       | 0       | 0       | 0       | 0       | 0       | 0       |
| 0       | 0       | 0       | 0       | 0       | 0       | 0       | 0       |
| 0.01155 | 0       | 0       | 0       | 0       | 0       | 0       | 0       |
| 0.01155 | 0       | 0       | 0       | 0       | 0       | 0       | 0       |
| 0.01103 | 0       | 0       | 0.00477 | 0       | 0.01025 | 0.017   | 0.00324 |
| 0.00094 | 0       | 0       | 0       | 0       | 0       | 0       | 0       |
| 0.01009 | 0       | 0       | 0.00477 | 0       | 0.01025 | 0.017   | 0.00324 |
| 0       | 0       | 0       | 0       | 0       | 0       | 0       | 0       |
| 0.0158  | 0.01544 | 0.31043 | 0.23663 | 0.07005 | 0.00272 | 0       | 0       |
| 0       | 0       | 0.31043 | 0.23243 | 0.05267 | 0       | 0       | 0       |
| 0       | 0       | 0       | 0       | 0       | 0       | 0       | 0       |
| 0.0158  | 0.01544 | 0       | 0.0042  | 0.01739 | 0.00272 | 0       | 0       |
| 0       | 0       | 0       | 0       | 0       | 0       | 0       | 0       |

|         |         |         |         |          |         |         |         |
|---------|---------|---------|---------|----------|---------|---------|---------|
| 0       | 0       | 0       | 0       | 0        | 0       | 0       | 0       |
| 4.96863 | 0.13116 | 0       | 0.00254 | 0.31348  | 0.01301 | 0       | 0.0493  |
| 0.79773 | 0.02099 | 0       | 0       | 0.11734  | 0.01177 | 0       | 0.02493 |
| 0.12404 | 0.00267 | 0       | 0       | 0.03428  | 0       | 0       | 0.00539 |
| 0.23901 | 0.01487 | 0       | 0       | 0.00747  | 0       | 0       | 0       |
| 3.15932 | 0.07753 | 0       | 0.00254 | 0.1231   | 0.00124 | 0       | 0.01462 |
| 0.03032 | 0       | 0       | 0       | 0        | 0       | 0       | 0       |
| 0.00034 | 0       | 0       | 0       | 0        | 0       | 0       | 0       |
| 0.17404 | 0.0046  | 0       | 0       | 0.03129  | 0       | 0       | 0.00435 |
| 0.44382 | 0.0105  | 0       | 0       | 0        | 0       | 0       | 0       |
| 0.00431 | 0.00327 | 0       | 0.00655 | 0.00011  | 0.00083 | 0.00289 | 0       |
| 0.00431 | 0.00327 | 0       | 0.00655 | 0.00011  | 0.00083 | 0.00289 | 0       |
| 0.00431 | 0.00327 | 0       | 0.00655 | 0.00011  | 0.00083 | 0.00289 | 0       |
| 0       | 0       | 0       | 0.00405 | 0        | 0       | 0       | 0       |
| 0       | 0       | 0       | 0       | 0        | 0       | 0       | 0       |
| 0       | 0       | 0       | 0.00405 | 0        | 0       | 0       | 0       |
| 0       | 0       | 0       | 0.0012  | 0        | 0.00066 | 0.00289 | 0       |
| 0       | 0       | 0       | 0.0012  | 0        | 0.00066 | 0.00289 | 0       |
| 0.00431 | 0.00327 | 0       | 0.0013  | 0.00011  | 0       | 0       | 0       |
| 0.00431 | 0.00327 | 0       | 0.0013  | 0.00011  | 0       | 0       | 0       |
| 0       | 0       | 0       | 0       | 0        | 0       | 0       | 0       |
| 0       | 0       | 0       | 0       | 0        | 0.00017 | 0       | 0       |
| 0       | 0       | 0       | 0       | 0        | 0       | 0       | 0       |
| 0       | 0       | 0       | 0       | 0        | 0.00017 | 0       | 0       |
| 0       | 0       | 0       | 0       | 0        | 0       | 0       | 0       |
| 0.57623 | 0.04111 | 3.78843 | 1.3307  | 10.53062 | 1.33907 | 8.63312 | 2.11027 |
| 0.57623 | 0.04111 | 3.78843 | 1.3307  | 10.53062 | 1.33907 | 8.63312 | 2.11027 |
| 0.57623 | 0.04111 | 3.78843 | 1.3307  | 10.53062 | 1.33907 | 8.63312 | 2.11027 |
| 0.57502 | 0.03789 | 3.78843 | 1.3307  | 10.53062 | 1.33907 | 8.63312 | 2.11027 |
| 0       | 0.00053 | 0       | 0       | 0        | 0       | 0       | 0       |
| 0       | 0.00053 | 0       | 0       | 0        | 0       | 0       | 0       |
| 0.57502 | 0.03736 | 3.78843 | 1.3307  | 10.53062 | 1.33907 | 8.63312 | 2.11027 |
| 0.00123 | 0       | 0       | 0       | 0        | 0       | 0       | 0       |
| 0       | 0       | 3.78098 | 1.31536 | 10.5294  | 0       | 0       | 0       |
| 0       | 0       | 0       | 0       | 0        | 0       | 0       | 0       |

|          |          |         |         |         |         |          |         |
|----------|----------|---------|---------|---------|---------|----------|---------|
| 0.52923  | 0.00942  | 0       | 0.00119 | 0       | 0       | 0        | 0       |
| 0.04457  | 0.02794  | 0       | 0       | 0       | 0       | 0        | 0       |
| 0        | 0        | 0       | 0       | 0       | 0       | 0        | 0       |
| 0        | 0        | 0.00073 | 0       | 0       | 0       | 0        | 0       |
| 0        | 0        | 0.00673 | 0.01415 | 0.00122 | 1.33907 | 8.63312  | 2.11027 |
| 0.0012   | 0.00323  | 0       | 0       | 0       | 0       | 0        | 0       |
| 0.0012   | 0.00323  | 0       | 0       | 0       | 0       | 0        | 0       |
| 0        | 0.00064  | 0       | 0       | 0       | 0       | 0        | 0       |
| 0.00071  | 0.00025  | 0       | 0       | 0       | 0       | 0        | 0       |
| 0        | 0        | 0       | 0       | 0       | 0       | 0        | 0       |
| 0.00042  | 0        | 0       | 0       | 0       | 0       | 0        | 0       |
| 0.00008  | 0.00234  | 0       | 0       | 0       | 0       | 0        | 0       |
| 0        | 0        | 0       | 0       | 0       | 0       | 0        | 0       |
| 0        | 0        | 0       | 0       | 0       | 0       | 0        | 0       |
| 0        | 0        | 0       | 0       | 0       | 0       | 0        | 0       |
| 0        | 0        | 0       | 0       | 0       | 0       | 0        | 0       |
| 0        | 0        | 0       | 0       | 0       | 0       | 0        | 0       |
| 0        | 0        | 0       | 0       | 0       | 0       | 0        | 0       |
| 34.38228 | 38.22236 | 1.11228 | 3.1642  | 0.90004 | 4.17471 | 26.79641 | 4.57473 |
| 0.48212  | 0.15945  | 0       | 0       | 0       | 0.35516 | 0        | 0       |
| 0.1967   | 0.14899  | 0       | 0       | 0       | 0.35516 | 0        | 0       |
| 0.17459  | 0.12526  | 0       | 0       | 0       | 0       | 0        | 0       |
| 0.17459  | 0.12526  | 0       | 0       | 0       | 0       | 0        | 0       |
| 0.17459  | 0.12526  | 0       | 0       | 0       | 0       | 0        | 0       |
| 0        | 0        | 0       | 0       | 0       | 0       | 0        | 0       |
| 0        | 0        | 0       | 0       | 0       | 0       | 0        | 0       |
| 0        | 0        | 0       | 0       | 0       | 0       | 0        | 0       |
| 0        | 0        | 0       | 0       | 0       | 0.35516 | 0        | 0       |
| 0        | 0        | 0       | 0       | 0       | 0.35516 | 0        | 0       |
| 0        | 0        | 0       | 0       | 0       | 0.35516 | 0        | 0       |
| 0.02211  | 0.02373  | 0       | 0       | 0       | 0       | 0        | 0       |
| 0        | 0        | 0       | 0       | 0       | 0       | 0        | 0       |
| 0        | 0        | 0       | 0       | 0       | 0       | 0        | 0       |
| 0.02211  | 0.02373  | 0       | 0       | 0       | 0       | 0        | 0       |
| 0.02211  | 0.02373  | 0       | 0       | 0       | 0       | 0        | 0       |



|          |         |         |         |         |         |          |         |
|----------|---------|---------|---------|---------|---------|----------|---------|
| 0        | 0       | 0       | 0       | 0       | 0       | 0        | 0       |
| 0        | 0       | 0       | 0       | 0       | 0       | 0        | 0       |
| 0.28542  | 0.01046 | 0       | 0       | 0       | 0       | 0        | 0       |
| 0.28542  | 0.01046 | 0       | 0       | 0       | 0       | 0        | 0       |
| 0.22142  | 0       | 0       | 0       | 0       | 0       | 0        | 0       |
| 0.22142  | 0       | 0       | 0       | 0       | 0       | 0        | 0       |
| 0.06399  | 0.01046 | 0       | 0       | 0       | 0       | 0        | 0       |
| 0        | 0       | 0       | 0       | 0       | 0       | 0        | 0       |
| 0.0293   | 0.00849 | 0       | 0       | 0       | 0       | 0        | 0       |
| 0.02049  | 0       | 0       | 0       | 0       | 0       | 0        | 0       |
| 0.0142   | 0.00197 | 0       | 0       | 0       | 0       | 0        | 0       |
| 0        | 0       | 0       | 0       | 0       | 0       | 0        | 0       |
| 0.11529  | 0.03175 | 0.04556 | 0.02075 | 0       | 0.17638 | 0.05664  | 0.00281 |
| 0.11529  | 0.03175 | 0.04556 | 0.02075 | 0       | 0.17638 | 0.05664  | 0.00281 |
| 0.11529  | 0.03175 | 0.04556 | 0.02075 | 0       | 0.17638 | 0.05664  | 0.00281 |
| 0.11529  | 0.03175 | 0.04556 | 0.02075 | 0       | 0.17638 | 0.05664  | 0.00281 |
| 0.11529  | 0.03175 | 0.04556 | 0.02075 | 0       | 0.17638 | 0.05664  | 0.00281 |
| 0        | 0       | 0       | 0       | 0       | 0       | 0        | 0       |
| 0        | 0       | 0       | 0       | 0       | 0       | 0        | 0       |
| 0        | 0       | 0       | 0       | 0       | 0       | 0        | 0       |
| 0.07278  | 0.01787 | 0.0173  | 0.0117  | 0.00285 | 0.16575 | 0        | 0       |
| 0.07278  | 0.01787 | 0.0173  | 0.0117  | 0.00285 | 0.16575 | 0        | 0       |
| 0.07278  | 0.01787 | 0.0173  | 0.0117  | 0.00285 | 0.16575 | 0        | 0       |
| 0.07278  | 0.01787 | 0.0173  | 0.0117  | 0.00285 | 0.16575 | 0        | 0       |
| 0.05399  | 0.01709 | 0       | 0       | 0.00285 | 0       | 0        | 0       |
| 0.00058  | 0       | 0       | 0       | 0       | 0       | 0        | 0       |
| 0        | 0       | 0       | 0       | 0       | 0.14431 | 0        | 0       |
| 0        | 0       | 0       | 0       | 0       | 0       | 0        | 0       |
| 0.01821  | 0.00078 | 0       | 0       | 0       | 0       | 0        | 0       |
| 0        | 0       | 0.0173  | 0.0117  | 0       | 0.02144 | 0        | 0       |
| 0        | 0       | 0       | 0       | 0       | 0       | 0        | 0       |
| 0        | 0       | 0       | 0       | 0       | 0       | 0        | 0       |
| 0        | 0       | 0       | 0       | 0       | 0       | 0        | 0       |
| 33.71209 | 38.0133 | 1.04942 | 3.13176 | 0.89719 | 3.47741 | 26.73977 | 4.57192 |
| 0        | 0.00542 | 0       | 0       | 0       | 0       | 0        | 0       |

|          |          |         |         |         |         |          |         |
|----------|----------|---------|---------|---------|---------|----------|---------|
| 0        | 0.00542  | 0       | 0       | 0       | 0       | 0        | 0       |
| 0        | 0.00542  | 0       | 0       | 0       | 0       | 0        | 0       |
| 0        | 0        | 0       | 0       | 0       | 0       | 0        | 0       |
| 0        | 0        | 0       | 0       | 0       | 0       | 0        | 0       |
| 0        | 0.00542  | 0       | 0       | 0       | 0       | 0        | 0       |
| 0        | 0        | 0       | 0       | 0       | 0       | 0        | 0       |
| 0        | 0        | 0       | 0       | 0       | 0       | 0        | 0       |
| 0        | 0        | 0       | 0       | 0       | 0       | 0        | 0       |
| 0.03133  | 0.00232  | 0       | 0       | 0       | 0       | 0        | 0       |
| 0.03133  | 0.00232  | 0       | 0       | 0       | 0       | 0        | 0       |
| 0.03133  | 0.00232  | 0       | 0       | 0       | 0       | 0        | 0       |
| 0.00627  | 0.00115  | 0       | 0       | 0       | 0       | 0        | 0       |
| 0.02506  | 0.00117  | 0       | 0       | 0       | 0       | 0        | 0       |
| 27.45095 | 36.10118 | 1.04942 | 3.13176 | 0.0277  | 3.47547 | 26.72251 | 4.49827 |
| 0        | 0.00664  | 0       | 0       | 0       | 0       | 0        | 0       |
| 0        | 0.00664  | 0       | 0       | 0       | 0       | 0        | 0       |
| 0        | 0.00664  | 0       | 0       | 0       | 0       | 0        | 0       |
| 26.94329 | 36.09454 | 1.04942 | 3.12578 | 0.0277  | 3.47547 | 26.72251 | 4.49827 |
| 0        | 0.02354  | 0       | 0       | 0.00542 | 0       | 0        | 0       |
| 0        | 0        | 0       | 0       | 0       | 0       | 0        | 0       |
| 0        | 0.00221  | 0       | 0       | 0       | 0       | 0        | 0       |
| 0        | 0        | 0       | 0       | 0       | 0       | 0        | 0       |
| 0        | 0        | 0       | 0       | 0       | 0       | 0        | 0       |
| 0        | 0.01238  | 0       | 0       | 0.00393 | 0       | 0        | 0       |
| 0        | 0        | 0       | 0       | 0       | 0       | 0        | 0       |
| 0        | 0        | 0       | 0       | 0       | 0       | 0        | 0       |
| 0        | 0.00223  | 0       | 0       | 0       | 0       | 0        | 0       |
| 0        | 0        | 0       | 0       | 0       | 0       | 0        | 0       |
| 0        | 0        | 0       | 0       | 0       | 0       | 0        | 0       |
| 0        | 0.00672  | 0       | 0       | 0.00148 | 0       | 0        | 0       |
| 0        | 0        | 0       | 0       | 0       | 0       | 0        | 0       |
| 0        | 0        | 0       | 0       | 0       | 0       | 0        | 0       |
| 0.00103  | 4.84522  | 0       | 0       | 0       | 0       | 0        | 0       |
| 0        | 0        | 0       | 0       | 0       | 0       | 0        | 0       |
| 0.00103  | 4.84522  | 0       | 0       | 0       | 0       | 0        | 0       |

|          |         |         |         |         |         |          |         |
|----------|---------|---------|---------|---------|---------|----------|---------|
| 0        | 0       | 0       | 0       | 0       | 0       | 0        | 0       |
| 8.23614  | 29.8524 | 1.04392 | 3.11916 | 0.02104 | 3.47547 | 26.72251 | 4.49827 |
| 8.23614  | 29.8524 | 1.04392 | 3.11916 | 0.02104 | 3.47547 | 26.72251 | 4.49827 |
| 0        | 0       | 0       | 0       | 0       | 0       | 0        | 0       |
| 18.70612 | 1.37339 | 0.0055  | 0.00663 | 0.00124 | 0       | 0        | 0       |
| 0        | 0.01334 | 0       | 0       | 0       | 0       | 0        | 0       |
| 0        | 0       | 0       | 0       | 0       | 0       | 0        | 0       |
| 0        | 0       | 0       | 0       | 0       | 0       | 0        | 0       |
| 16.06869 | 0.58481 | 0.0055  | 0.00663 | 0       | 0       | 0        | 0       |
| 1.70071  | 0.58217 | 0       | 0       | 0       | 0       | 0        | 0       |
| 0.93672  | 0.19306 | 0       | 0       | 0.00124 | 0       | 0        | 0       |
| 0        | 0       | 0       | 0       | 0       | 0       | 0        | 0       |
| 0        | 0       | 0       | 0       | 0       | 0       | 0        | 0       |
| 0        | 0       | 0       | 0       | 0       | 0       | 0        | 0       |
| 0        | 0       | 0       | 0       | 0       | 0       | 0        | 0       |
| 0        | 0       | 0       | 0       | 0       | 0       | 0        | 0       |
| 0        | 0       | 0       | 0       | 0       | 0       | 0        | 0       |
| 0        | 0       | 0       | 0       | 0       | 0       | 0        | 0       |
| 0        | 0       | 0       | 0       | 0       | 0       | 0        | 0       |
| 0        | 0       | 0       | 0.00598 | 0       | 0       | 0        | 0       |
| 0        | 0       | 0       | 0.00598 | 0       | 0       | 0        | 0       |
| 0        | 0       | 0       | 0.00598 | 0       | 0       | 0        | 0       |
| 0.50766  | 0       | 0       | 0       | 0       | 0       | 0        | 0       |
| 0.50766  | 0       | 0       | 0       | 0       | 0       | 0        | 0       |
| 0.50766  | 0       | 0       | 0       | 0       | 0       | 0        | 0       |
| 0        | 0       | 0       | 0       | 0       | 0       | 0        | 0       |
| 0        | 0       | 0       | 0       | 0       | 0       | 0        | 0       |
| 6.22981  | 1.90438 | 0       | 0       | 0.86949 | 0.00194 | 0.00927  | 0.07365 |
| 6.22981  | 1.90438 | 0       | 0       | 0.86949 | 0.00194 | 0.00927  | 0.07365 |
| 0.62459  | 0.19525 | 0       | 0       | 0       | 0       | 0        | 0.001   |
| 0.41337  | 0.16328 | 0       | 0       | 0       | 0       | 0        | 0.001   |
| 0.21122  | 0.03197 | 0       | 0       | 0       | 0       | 0        | 0       |
| 5.60522  | 1.70913 | 0       | 0       | 0.86949 | 0.00194 | 0.00927  | 0.07265 |
| 0        | 0.00685 | 0       | 0       | 0       | 0       | 0        | 0       |
| 0        | 0.00233 | 0       | 0       | 0       | 0       | 0        | 0       |



|        |   |   |   |   |   |   |   |         |
|--------|---|---|---|---|---|---|---|---------|
| 0      | 0 | 0 | 0 | 0 | 0 | 0 | 0 | 0.00033 |
| 0      | 0 | 0 | 0 | 0 | 0 | 0 | 0 | 0.00033 |
| 0      | 0 | 0 | 0 | 0 | 0 | 0 | 0 | 0.00033 |
| 0      | 0 | 0 | 0 | 0 | 0 | 0 | 0 | 0.00033 |
| 0      | 0 | 0 | 0 | 0 | 0 | 0 | 0 | 0.00033 |
| 0      | 0 | 0 | 0 | 0 | 0 | 0 | 0 | 0.00033 |
| 0      | 0 | 0 | 0 | 0 | 0 | 0 | 0 | 0       |
| 0      | 0 | 0 | 0 | 0 | 0 | 0 | 0 | 0       |
| 0      | 0 | 0 | 0 | 0 | 0 | 0 | 0 | 0       |
| 0      | 0 | 0 | 0 | 0 | 0 | 0 | 0 | 0       |
| 0      | 0 | 0 | 0 | 0 | 0 | 0 | 0 | 0       |
| 0      | 0 | 0 | 0 | 0 | 0 | 0 | 0 | 0       |
| 0      | 0 | 0 | 0 | 0 | 0 | 0 | 0 | 0       |
| 0      | 0 | 0 | 0 | 0 | 0 | 0 | 0 | 0       |
| 0      | 0 | 0 | 0 | 0 | 0 | 0 | 0 | 0       |
| 0      | 0 | 0 | 0 | 0 | 0 | 0 | 0 | 0       |
| 0.0031 | 0 | 0 | 0 | 0 | 0 | 0 | 0 | 0       |
| 0.0031 | 0 | 0 | 0 | 0 | 0 | 0 | 0 | 0       |
| 0.0031 | 0 | 0 | 0 | 0 | 0 | 0 | 0 | 0       |
| 0.0031 | 0 | 0 | 0 | 0 | 0 | 0 | 0 | 0       |
| 0      | 0 | 0 | 0 | 0 | 0 | 0 | 0 | 0       |
| 0      | 0 | 0 | 0 | 0 | 0 | 0 | 0 | 0       |
| 0      | 0 | 0 | 0 | 0 | 0 | 0 | 0 | 0       |
| 0.0031 | 0 | 0 | 0 | 0 | 0 | 0 | 0 | 0       |
| 0.0031 | 0 | 0 | 0 | 0 | 0 | 0 | 0 | 0       |
| 0.0031 | 0 | 0 | 0 | 0 | 0 | 0 | 0 | 0       |

---

| AP011_1 | AP011_2  | AP011_3 | AP013_1 | AP013_2 | AP013_3 | AP014_1  | AP014_2  |
|---------|----------|---------|---------|---------|---------|----------|----------|
| 100     | 99.93978 | 100     | 100     | 100     | 100     | 99.99866 | 99.99722 |
| 1.93693 | 6.04031  | 2.7563  | 0.33956 | 0.6431  | 0.72081 | 0.14769  | 0.36028  |
| 1.81974 | 4.83339  | 2.49033 | 0.08468 | 0.01441 | 0.57712 | 0.01123  | 0.04271  |
| 0.00108 | 0.03015  | 0.00329 | 0.00268 | 0.00083 | 0       | 0        | 0.00579  |
| 0.00108 | 0.03015  | 0.00329 | 0.00268 | 0.00083 | 0       | 0        | 0.00579  |
| 0       | 0        | 0       | 0       | 0       | 0       | 0        | 0.00308  |
| 0       | 0        | 0       | 0       | 0       | 0       | 0        | 0.00308  |
| 0.00108 | 0.03015  | 0.00329 | 0.00268 | 0.00083 | 0       | 0        | 0.00271  |
| 0       | 0        | 0       | 0       | 0       | 0       | 0        | 0        |
| 0       | 0        | 0       | 0       | 0       | 0       | 0        | 0        |
| 0       | 0        | 0       | 0       | 0       | 0       | 0        | 0        |
| 0       | 0        | 0       | 0       | 0       | 0       | 0        | 0        |
| 0       | 0        | 0       | 0       | 0       | 0       | 0        | 0        |
| 0       | 0        | 0       | 0.0021  | 0.00007 | 0       | 0        | 0        |
| 0       | 0        | 0       | 0       | 0       | 0       | 0        | 0        |
| 0       | 0        | 0       | 0       | 0       | 0       | 0        | 0        |
| 0       | 0.00132  | 0       | 0       | 0       | 0       | 0        | 0        |
| 0       | 0        | 0       | 0.00058 | 0       | 0       | 0        | 0        |
| 0       | 0.00221  | 0       | 0       | 0.00076 | 0       | 0        | 0        |
| 0       | 0.00086  | 0       | 0       | 0       | 0       | 0        | 0        |
| 0.00108 | 0.02576  | 0.00329 | 0       | 0       | 0       | 0        | 0        |
| 0       | 0        | 0       | 0       | 0       | 0       | 0        | 0        |
| 0       | 0        | 0       | 0       | 0       | 0       | 0        | 0.00271  |
| 0       | 0        | 0       | 0       | 0       | 0       | 0        | 0        |
| 1.81866 | 4.79893  | 2.48704 | 0.0801  | 0.01248 | 0.57712 | 0        | 0.00087  |
| 1.81866 | 4.79893  | 2.48704 | 0.0801  | 0.01248 | 0.57712 | 0        | 0.00087  |
| 0       | 0        | 0       | 0       | 0       | 0       | 0        | 0        |
| 0       | 0        | 0       | 0       | 0       | 0       | 0        | 0        |
| 0       | 0        | 0       | 0       | 0       | 0       | 0        | 0        |
| 0       | 0        | 0       | 0       | 0       | 0       | 0        | 0        |
| 1.81531 | 4.77306  | 2.48704 | 0.0801  | 0.01248 | 0.57712 | 0        | 0.00087  |

|         |         |         |         |         |         |         |         |
|---------|---------|---------|---------|---------|---------|---------|---------|
| 0       | 0       | 0       | 0       | 0       | 0.00104 | 0       | 0       |
| 0       | 0       | 0       | 0       | 0       | 0       | 0       | 0       |
| 0       | 0       | 0       | 0       | 0       | 0       | 0       | 0       |
| 0       | 0       | 0       | 0       | 0       | 0       | 0       | 0       |
| 0       | 0.00101 | 0       | 0       | 0       | 0       | 0       | 0       |
| 0.63303 | 0.7126  | 2.36411 | 0.00543 | 0.00332 | 0.00292 | 0       | 0.00087 |
| 1.18228 | 4.05945 | 0.12294 | 0.07468 | 0.00916 | 0.57316 | 0       | 0       |
| 0       | 0       | 0       | 0       | 0       | 0       | 0       | 0       |
| 0       | 0       | 0       | 0       | 0       | 0       | 0       | 0       |
| 0.00334 | 0.02587 | 0       | 0       | 0       | 0       | 0       | 0       |
| 0.00334 | 0.02587 | 0       | 0       | 0       | 0       | 0       | 0       |
| 0       | 0       | 0       | 0       | 0       | 0       | 0       | 0       |
| 0       | 0       | 0       | 0       | 0       | 0       | 0       | 0       |
| 0       | 0       | 0       | 0       | 0       | 0       | 0       | 0       |
| 0       | 0       | 0       | 0       | 0       | 0       | 0       | 0       |
| 0       | 0       | 0       | 0       | 0       | 0       | 0       | 0       |
| 0       | 0       | 0       | 0       | 0       | 0       | 0       | 0       |
| 0       | 0.00431 | 0       | 0.00189 | 0.0011  | 0       | 0.01123 | 0.03604 |
| 0       | 0.00431 | 0       | 0.00189 | 0.0011  | 0       | 0.01123 | 0.03604 |
| 0       | 0.00431 | 0       | 0.00189 | 0.0011  | 0       | 0.01123 | 0.03604 |
| 0       | 0       | 0       | 0       | 0       | 0       | 0       | 0.00102 |
| 0       | 0.00431 | 0       | 0       | 0       | 0       | 0.00015 | 0       |
| 0       | 0       | 0       | 0.00189 | 0.0011  | 0       | 0.01108 | 0.03502 |
| 0       | 0       | 0       | 0       | 0       | 0       | 0       | 0       |
| 0       | 0       | 0       | 0       | 0       | 0       | 0       | 0       |
| 0       | 0       | 0       | 0       | 0       | 0       | 0       | 0       |
| 0       | 0       | 0       | 0       | 0       | 0       | 0       | 0       |
| 0       | 0       | 0       | 0       | 0       | 0       | 0       | 0       |
| 0       | 0       | 0       | 0       | 0       | 0       | 0       | 0       |
| 0.11719 | 1.20692 | 0.26597 | 0.25488 | 0.62868 | 0.14369 | 0.13647 | 0.31757 |
| 0.10331 | 0.87605 | 0.22969 | 0.18052 | 0.18353 | 0.13321 | 0.09718 | 0.16047 |
| 0       | 0.00796 | 0       | 0       | 0       | 0       | 0       | 0       |
| 0       | 0.00796 | 0       | 0       | 0       | 0       | 0       | 0       |
| 0       | 0       | 0       | 0       | 0       | 0       | 0       | 0       |
| 0       | 0.00796 | 0       | 0       | 0       | 0       | 0       | 0       |

|          |          |          |          |          |          |          |          |
|----------|----------|----------|----------|----------|----------|----------|----------|
| 0        | 0        | 0        | 0        | 0        | 0        | 0        | 0        |
| 0        | 0        | 0        | 0        | 0        | 0        | 0        | 0        |
| 0        | 0        | 0        | 0        | 0        | 0        | 0        | 0        |
| 0        | 0        | 0        | 0        | 0        | 0        | 0        | 0        |
| 0.10331  | 0.86809  | 0.22969  | 0.18052  | 0.18353  | 0.13321  | 0.09718  | 0.16047  |
| 0.10331  | 0.86798  | 0.22969  | 0.18052  | 0.18353  | 0.13321  | 0.09718  | 0.16047  |
| 0.0894   | 0.84689  | 0.22655  | 0.18052  | 0.18353  | 0.13321  | 0.09718  | 0.16047  |
| 0.00336  | 0.00471  | 0.0006   | 0        | 0        | 0        | 0        | 0        |
| 0.01054  | 0.01639  | 0.00254  | 0        | 0        | 0        | 0        | 0        |
| 0        | 0.00011  | 0        | 0        | 0        | 0        | 0        | 0        |
| 0        | 0.00011  | 0        | 0        | 0        | 0        | 0        | 0        |
| 0        | 0        | 0        | 0        | 0        | 0        | 0        | 0        |
| 0.01388  | 0.33087  | 0.03628  | 0.07436  | 0.44515  | 0.01048  | 0.03929  | 0.15711  |
| 0.01388  | 0.33087  | 0.03628  | 0.07436  | 0.44515  | 0.01048  | 0.03929  | 0.15711  |
| 0.00334  | 0.01812  | 0        | 0.02298  | 0.01045  | 0.00458  | 0.00014  | 0        |
| 0.00334  | 0.01812  | 0        | 0.02298  | 0.01045  | 0.00458  | 0.00014  | 0        |
| 0.00056  | 0.00366  | 0        | 0.00644  | 0.00326  | 0.00031  | 0        | 0        |
| 0.00056  | 0.00366  | 0        | 0.00644  | 0.00326  | 0.00031  | 0        | 0        |
| 0.00865  | 0.20477  | 0.02727  | 0.03815  | 0.38018  | 0.00517  | 0.0379   | 0.14827  |
| 0.00865  | 0.20477  | 0.02727  | 0.03815  | 0.38018  | 0.00517  | 0.0379   | 0.14827  |
| 0        | 0.00032  | 0        | 0        | 0.00007  | 0        | 0        | 0        |
| 0        | 0.00032  | 0        | 0        | 0.00007  | 0        | 0        | 0        |
| 0.00134  | 0.10399  | 0.00901  | 0.0068   | 0.0512   | 0.00042  | 0.00125  | 0.00883  |
| 0.00134  | 0.10399  | 0.00901  | 0.0068   | 0.0512   | 0.00042  | 0.00125  | 0.00883  |
| 0        | 0        | 0        | 0        | 0        | 0        | 0        | 0        |
| 0        | 0        | 0        | 0        | 0        | 0        | 0        | 0        |
| 70.10969 | 74.33106 | 68.66265 | 75.30629 | 72.66905 | 77.93315 | 83.57551 | 70.76873 |
| 0        | 0        | 0        | 0        | 0        | 0        | 0        | 0        |
| 0        | 0        | 0        | 0        | 0        | 0        | 0        | 0        |
| 0        | 0        | 0        | 0        | 0        | 0        | 0        | 0        |
| 0        | 0        | 0        | 0        | 0        | 0        | 0        | 0        |
| 0        | 0        | 0        | 0        | 0        | 0        | 0        | 0        |
| 70.10969 | 74.33106 | 68.66265 | 75.30629 | 72.66905 | 77.93315 | 83.57551 | 70.76873 |
| 70.10969 | 74.33106 | 68.66265 | 75.30629 | 72.66905 | 77.93315 | 83.57551 | 70.76873 |
| 46.56422 | 30.56495 | 57.23497 | 51.97555 | 49.86091 | 66.37601 | 66.09381 | 41.06396 |



|          |          |          |          |          |          |          |          |
|----------|----------|----------|----------|----------|----------|----------|----------|
| 46.56422 | 30.56495 | 57.23497 | 51.97555 | 49.86091 | 66.37601 | 66.09381 | 41.06396 |
| 0        | 0        | 0        | 0        | 0        | 0.00064  | 7.32368  | 1.76049  |
| 0        | 0        | 0        | 0.10425  | 0.2622   | 1.18225  | 0.04305  | 0.00045  |
| 0        | 0        | 0        | 0        | 0        | 0        | 0        | 0        |
| 0.00101  | 0.00151  | 0.00098  | 0.00084  | 0        | 0.00535  | 12.30689 | 11.41954 |
| 0.02704  | 0.17364  | 4.27978  | 0        | 0        | 0        | 0        | 0        |
| 0        | 0        | 0        | 0.00009  | 0        | 0        | 0        | 0        |
| 0        | 0        | 0        | 0        | 0        | 0        | 0        | 0        |
| 0.53053  | 0.12517  | 0.17943  | 0        | 0        | 0        | 0        | 0        |
| 4.75979  | 0.1001   | 1.62077  | 8.14948  | 7.75841  | 4.06687  | 12.15317 | 13.90131 |
| 2.61663  | 0.70626  | 0.78464  | 0.75672  | 0.31208  | 0.28452  | 0.54255  | 0.08193  |
| 2.28401  | 6.00039  | 2.12729  | 0        | 0        | 0        | 0        | 0        |
| 0        | 0        | 0.06758  | 0.00942  | 0.00769  | 0.00318  | 0.18654  | 0.03294  |
| 3.4162   | 1.91749  | 1.58197  | 0.5037   | 0.06932  | 2.67832  | 0.23736  | 0.4742   |
| 0.00028  | 0.00052  | 0.00039  | 0.00032  | 0        | 0.00079  | 0.16247  | 0.00327  |
| 0.05832  | 0.04904  | 0.09486  | 0.65779  | 2.95095  | 0.0714   | 0        | 0        |
| 0        | 0        | 0        | 0.00212  | 0.00011  | 0.00883  | 0        | 0        |
| 0        | 0        | 0        | 0        | 0        | 0        | 0.2032   | 0.32074  |
| 2.98341  | 0.76132  | 16.44498 | 0        | 0        | 0        | 0.75233  | 0.35406  |
| 3.62896  | 2.13959  | 6.09481  | 4.98158  | 12.75278 | 3.17553  | 26.66398 | 10.17909 |
| 21.17367 | 13.25665 | 2.57249  | 12.42017 | 3.95582  | 33.80301 | 5.42457  | 2.52162  |
| 5.08116  | 5.33241  | 21.38298 | 24.28535 | 21.79008 | 19.27064 | 0.01021  | 0.00867  |
| 0.0032   | 0.00085  | 0.002    | 0.10372  | 0.00145  | 1.82469  | 0.0838   | 0.00564  |
| 1.54212  | 0.09528  | 0.13017  | 0        | 0        | 0        | 0.01653  | 0.00877  |
| 0        | 0        | 0        | 0        | 0        | 0        | 0        | 0        |
| 0        | 0        | 0        | 0        | 0        | 0        | 0        | 0        |
| 1.54212  | 0.09528  | 0.13017  | 0        | 0        | 0        | 0.01653  | 0.00877  |
| 0        | 0        | 0        | 0        | 0        | 0        | 0        | 0        |
| 1.54212  | 0.09528  | 0.13017  | 0        | 0        | 0        | 0.01653  | 0.00877  |
| 0.28684  | 1.039    | 1.24038  | 3.71204  | 3.47717  | 1.03393  | 4.04428  | 10.2402  |
| 0.09136  | 0.91603  | 0.53705  | 3.1816   | 2.65422  | 0.56137  | 1.78068  | 2.45071  |
| 0        | 0        | 0        | 0.00542  | 0.00197  | 0.00114  | 0.00169  | 0.00055  |
| 0.09136  | 0.91603  | 0.53705  | 3.17618  | 2.65225  | 0.56022  | 1.77899  | 2.45016  |
| 0.19548  | 0.12297  | 0.70332  | 0.53045  | 0.82295  | 0.47257  | 2.2636   | 7.78949  |
| 0        | 0        | 0        | 0        | 0        | 0        | 0        | 0        |

|          |          |         |          |         |         |         |         |
|----------|----------|---------|----------|---------|---------|---------|---------|
| 0.19548  | 0.12297  | 0.70332 | 0.53045  | 0.82295 | 0.47257 | 2.2636  | 7.78949 |
| 0        | 0        | 0       | 0.00054  | 0.00242 | 0       | 0       | 0       |
| 0        | 0        | 0       | 0        | 0       | 0       | 0       | 0       |
| 0        | 0        | 0       | 0        | 0       | 0       | 0       | 0       |
| 0        | 0        | 0       | 0        | 0       | 0       | 0       | 0       |
| 0        | 0        | 0       | 0        | 0       | 0       | 0       | 0       |
| 0        | 0        | 0       | 0.00054  | 0.00242 | 0       | 0       | 0       |
| 0        | 0        | 0       | 0.00054  | 0.00242 | 0       | 0       | 0       |
| 0.00057  | 0        | 0.00307 | 0        | 0.0011  | 0       | 0.0071  | 0.00397 |
| 0        | 0        | 0       | 0        | 0       | 0       | 0       | 0       |
| 0        | 0        | 0       | 0        | 0       | 0       | 0       | 0       |
| 0        | 0        | 0       | 0        | 0       | 0       | 0       | 0       |
| 0        | 0        | 0       | 0        | 0       | 0       | 0       | 0       |
| 0        | 0        | 0       | 0        | 0       | 0       | 0       | 0       |
| 0.00057  | 0        | 0.00307 | 0        | 0.0011  | 0       | 0.0071  | 0.00397 |
| 0        | 0        | 0       | 0        | 0       | 0       | 0.0071  | 0.00397 |
| 0        | 0        | 0       | 0        | 0       | 0       | 0       | 0       |
| 0        | 0        | 0       | 0        | 0.0011  | 0       | 0       | 0       |
| 0        | 0        | 0       | 0        | 0       | 0       | 0       | 0       |
| 0.00057  | 0        | 0       | 0        | 0       | 0       | 0       | 0       |
| 0        | 0        | 0       | 0        | 0       | 0       | 0       | 0       |
| 0        | 0        | 0.00307 | 0        | 0       | 0       | 0       | 0       |
| 0        | 0        | 0       | 0        | 0       | 0       | 0       | 0       |
| 0        | 0        | 0       | 0        | 0       | 0       | 0       | 0       |
| 0        | 0        | 0       | 0        | 0       | 0       | 0       | 0       |
| 0        | 0        | 0       | 0        | 0       | 0       | 0       | 0       |
| 0        | 0        | 0       | 0        | 0       | 0       | 0       | 0       |
| 0        | 0        | 0       | 0        | 0       | 0       | 0       | 0       |
| 0        | 0        | 0       | 0        | 0       | 0       | 0       | 0       |
| 0        | 0        | 0       | 0        | 0       | 0       | 0       | 0       |
| 0        | 0        | 0       | 0        | 0       | 0       | 0       | 0       |
| 0        | 0        | 0       | 0        | 0       | 0       | 0       | 0       |
| 0        | 0        | 0       | 0        | 0       | 0       | 0       | 0       |
| 0        | 0        | 0       | 0        | 0       | 0       | 0       | 0       |
| 0        | 0        | 0       | 0        | 0       | 0       | 0       | 0       |
| 0        | 0        | 0       | 0        | 0       | 0       | 0       | 0       |
| 15.12638 | 16.45769 | 4.88285 | 14.09548 | 8.72586 | 6.26008 | 2.92461 | 9.05106 |
| 15.12638 | 16.45769 | 4.88285 | 14.09548 | 8.72586 | 6.26008 | 2.92461 | 9.05106 |



|         |         |         |         |         |         |         |         |
|---------|---------|---------|---------|---------|---------|---------|---------|
| 0       | 0       | 0       | 0       | 0       | 0       | 0       | 0.00253 |
| 0       | 0       | 0       | 0       | 0       | 0       | 0       | 0.00253 |
| 0       | 0       | 0       | 0       | 0       | 0       | 0       | 0       |
| 0       | 0.17967 | 0.01563 | 0.02727 | 0.05041 | 0.02598 | 0.31572 | 0.11495 |
| 0       | 0.17967 | 0.01563 | 0.02727 | 0.05041 | 0.02598 | 0.31572 | 0.11495 |
| 0       | 0       | 0       | 0       | 0       | 0       | 0       | 0       |
| 0       | 0       | 0       | 0       | 0       | 0       | 0       | 0       |
| 0       | 0       | 0       | 0       | 0       | 0       | 0       | 0       |
| 0       | 0.17967 | 0.01563 | 0.00496 | 0.03381 | 0.00731 | 0.31572 | 0.11495 |
| 0       | 0       | 0       | 0.02231 | 0.01661 | 0.01866 | 0       | 0       |
| 0       | 0       | 0       | 0       | 0       | 0       | 0       | 0       |
| 0       | 0       | 0       | 0       | 0       | 0       | 0       | 0       |
| 0       | 0       | 0       | 0       | 0       | 0       | 0       | 0       |
| 0       | 0       | 0       | 0       | 0       | 0       | 0       | 0       |
| 0       | 0       | 0       | 0       | 0       | 0       | 0       | 0       |
| 0.00698 | 0.07239 | 0       | 0       | 0       | 0       | 0.00126 | 0       |
| 0.00698 | 0.07239 | 0       | 0       | 0       | 0       | 0.00126 | 0       |
| 0       | 0       | 0       | 0       | 0       | 0       | 0       | 0       |
| 0       | 0       | 0       | 0       | 0       | 0       | 0       | 0       |
| 0       | 0       | 0       | 0       | 0       | 0       | 0       | 0       |
| 0       | 0       | 0       | 0       | 0       | 0       | 0       | 0       |
| 0       | 0       | 0       | 0       | 0       | 0       | 0       | 0       |
| 0       | 0       | 0       | 0       | 0       | 0       | 0       | 0       |
| 0       | 0       | 0       | 0       | 0       | 0       | 0       | 0       |
| 0.00327 | 0       | 0       | 0       | 0       | 0       | 0       | 0       |
| 0.0037  | 0.07239 | 0       | 0       | 0       | 0       | 0.00126 | 0       |
| 0       | 0       | 0       | 0       | 0       | 0       | 0       | 0       |
| 0       | 0       | 0       | 0       | 0       | 0       | 0       | 0       |
| 0       | 0       | 0       | 0       | 0       | 0       | 0       | 0       |
| 0       | 0       | 0       | 0       | 0       | 0       | 0       | 0       |
| 0       | 0       | 0       | 0       | 0       | 0       | 0       | 0       |
| 0       | 0       | 0       | 0       | 0       | 0       | 0       | 0       |
| 0       | 0       | 0       | 0       | 0       | 0       | 0       | 0       |
| 0       | 0       | 0       | 0       | 0       | 0       | 0       | 0       |
| 0.02864 | 0.0763  | 0.02256 | 0.15428 | 0.00968 | 0.06588 | 0.07966 | 0.01474 |

|          |          |          |          |         |         |          |          |
|----------|----------|----------|----------|---------|---------|----------|----------|
| 0.02864  | 0.0763   | 0.02256  | 0.15428  | 0.00968 | 0.06588 | 0.07966  | 0.01474  |
| 0        | 0.00113  | 0        | 0.0028   | 0.00088 | 0       | 0        | 0        |
| 0        | 0        | 0        | 0        | 0       | 0       | 0        | 0        |
| 0        | 0        | 0        | 0        | 0       | 0       | 0        | 0        |
| 0        | 0.0001   | 0        | 0        | 0       | 0       | 0        | 0        |
| 0        | 0        | 0        | 0        | 0       | 0       | 0.01054  | 0        |
| 0        | 0        | 0        | 0.00034  | 0.00347 | 0       | 0        | 0.01474  |
| 0        | 0        | 0        | 0        | 0       | 0       | 0        | 0        |
| 0        | 0        | 0        | 0        | 0       | 0       | 0        | 0        |
| 0        | 0        | 0        | 0        | 0       | 0       | 0        | 0        |
| 0        | 0.00426  | 0        | 0        | 0       | 0       | 0        | 0        |
| 0        | 0.0003   | 0.00097  | 0.00625  | 0       | 0       | 0.00213  | 0        |
| 0.00863  | 0.01575  | 0.02159  | 0.0259   | 0       | 0.00884 | 0.03888  | 0        |
| 0.00514  | 0.00211  | 0        | 0.00414  | 0       | 0       | 0        | 0        |
| 0        | 0        | 0        | 0        | 0       | 0       | 0        | 0        |
| 0.01341  | 0.0515   | 0        | 0.11486  | 0.00533 | 0.05626 | 0.02811  | 0        |
| 0        | 0        | 0        | 0        | 0       | 0       | 0        | 0        |
| 0        | 0        | 0        | 0        | 0       | 0       | 0        | 0        |
| 0        | 0        | 0        | 0        | 0       | 0       | 0        | 0        |
| 0        | 0        | 0        | 0        | 0       | 0       | 0        | 0        |
| 0        | 0        | 0        | 0        | 0       | 0       | 0        | 0        |
| 0        | 0        | 0        | 0        | 0       | 0       | 0        | 0        |
| 0        | 0        | 0        | 0        | 0       | 0       | 0        | 0        |
| 0        | 0        | 0        | 0        | 0       | 0       | 0        | 0        |
| 0        | 0        | 0        | 0        | 0       | 0       | 0        | 0        |
| 0        | 0        | 0        | 0        | 0       | 0       | 0        | 0        |
| 0        | 0        | 0        | 0        | 0       | 0       | 0        | 0        |
| 0        | 0        | 0        | 0        | 0       | 0       | 0        | 0        |
| 0        | 0        | 0        | 0        | 0       | 0       | 0        | 0        |
| 0.00145  | 0.00115  | 0        | 0        | 0       | 0.00078 | 0        | 0        |
| 0        | 0        | 0        | 0        | 0       | 0       | 0        | 0        |
| 20.35225 | 12.82571 | 10.41629 | 10.14805 | 5.72996 | 8.1237  | 10.37048 | 24.30773 |
| 20.35225 | 12.82571 | 10.41629 | 10.14805 | 5.72996 | 8.1237  | 10.37048 | 24.30773 |
| 0        | 0        | 0        | 0.00117  | 0.00653 | 0.00103 | 0        | 0.00541  |
| 0        | 0        | 0        | 0.00117  | 0.00653 | 0.00103 | 0        | 0.00541  |
| 0        | 0        | 0        | 0.00117  | 0.00653 | 0.00103 | 0        | 0.00541  |
| 0        | 0        | 0        | 0.0042   | 0.07161 | 0       | 0        | 0.00823  |

|         |         |         |         |         |         |         |         |
|---------|---------|---------|---------|---------|---------|---------|---------|
| 0       | 0       | 0       | 0.0042  | 0.07161 | 0       | 0       | 0.00823 |
| 0       | 0       | 0       | 0.0042  | 0.07161 | 0       | 0       | 0.00823 |
| 0.6333  | 0.06133 | 0.21903 | 0.42303 | 1.21988 | 0.45702 | 0.11756 | 0.27221 |
| 0       | 0       | 0       | 0       | 0       | 0       | 0       | 0       |
| 0       | 0       | 0       | 0       | 0       | 0       | 0       | 0       |
| 0.06835 | 0.04309 | 0.0127  | 0.30057 | 0.11026 | 0.42914 | 0.02741 | 0.23321 |
| 0       | 0       | 0       | 0.00395 | 0       | 0       | 0       | 0       |
| 0.00549 | 0.00099 | 0.0127  | 0.04994 | 0.03437 | 0.01392 | 0.00798 | 0.07979 |
| 0       | 0       | 0       | 0       | 0       | 0       | 0       | 0       |
| 0       | 0       | 0       | 0       | 0       | 0       | 0       | 0       |
| 0       | 0       | 0       | 0       | 0       | 0       | 0       | 0       |
| 0       | 0       | 0       | 0       | 0       | 0       | 0       | 0       |
| 0       | 0       | 0       | 0       | 0       | 0       | 0       | 0       |
| 0       | 0       | 0       | 0       | 0       | 0       | 0       | 0       |
| 0       | 0       | 0       | 0       | 0       | 0       | 0       | 0       |
| 0       | 0       | 0       | 0.17314 | 0.07589 | 0.07166 | 0.01943 | 0.15342 |
| 0       | 0       | 0       | 0       | 0       | 0       | 0       | 0       |
| 0.06286 | 0.0421  | 0       | 0       | 0       | 0       | 0       | 0       |
| 0       | 0       | 0       | 0.07354 | 0       | 0.34356 | 0       | 0       |
| 0       | 0       | 0       | 0       | 0       | 0       | 0       | 0       |
| 0       | 0       | 0       | 0       | 0       | 0       | 0       | 0       |
| 0.56495 | 0.01824 | 0.20633 | 0.12128 | 1.10935 | 0.02787 | 0.09015 | 0.03901 |
| 0       | 0       | 0       | 0       | 0.00092 | 0       | 0       | 0       |
| 0.56495 | 0.01824 | 0.20633 | 0.12128 | 1.10842 | 0.02787 | 0.09015 | 0.03901 |
| 0       | 0       | 0       | 0.00117 | 0.00028 | 0       | 0       | 0       |
| 0       | 0       | 0       | 0.00117 | 0.00028 | 0       | 0       | 0       |
| 0       | 0.00499 | 0       | 0       | 0       | 0       | 0       | 0       |
| 0       | 0.00244 | 0       | 0       | 0       | 0       | 0       | 0       |
| 0       | 0       | 0       | 0       | 0       | 0       | 0       | 0       |
| 0       | 0       | 0       | 0       | 0       | 0       | 0       | 0       |
| 0       | 0       | 0       | 0       | 0       | 0       | 0       | 0       |
| 0       | 0.00244 | 0       | 0       | 0       | 0       | 0       | 0       |
| 0       | 0.00255 | 0       | 0       | 0       | 0       | 0       | 0       |
| 0       | 0.00255 | 0       | 0       | 0       | 0       | 0       | 0       |
| 0.33419 | 0.0236  | 0.1495  | 0.00774 | 0.00473 | 0.02754 | 0.81247 | 0.59794 |

|          |         |         |         |         |         |         |         |
|----------|---------|---------|---------|---------|---------|---------|---------|
| 0        | 0       | 0       | 0.00586 | 0.00025 | 0.00036 | 0.2699  | 0.11726 |
| 0        | 0       | 0       | 0.00586 | 0.00025 | 0.00036 | 0.2699  | 0.11726 |
| 0.31082  | 0.0236  | 0.04463 | 0.00177 | 0       | 0.01194 | 0.54242 | 0.46824 |
| 0.31082  | 0.0236  | 0.04463 | 0.00177 | 0       | 0.01194 | 0.54242 | 0.46824 |
| 0.02337  | 0       | 0.10487 | 0.00011 | 0.00449 | 0.01524 | 0.00015 | 0.01243 |
| 0.02337  | 0       | 0.10487 | 0.00011 | 0.00449 | 0.01524 | 0.00015 | 0.01243 |
| 0        | 0       | 0       | 0       | 0       | 0       | 0       | 0       |
| 0        | 0       | 0       | 0       | 0       | 0       | 0       | 0       |
| 0.50604  | 0.26816 | 0.4797  | 2.64224 | 0.20567 | 1.76868 | 0.20571 | 0.00093 |
| 0        | 0       | 0       | 0.00092 | 0       | 0       | 0       | 0       |
| 0        | 0       | 0       | 0.00092 | 0       | 0       | 0       | 0       |
| 0        | 0       | 0       | 0       | 0       | 0       | 0       | 0       |
| 0        | 0       | 0       | 0       | 0       | 0       | 0       | 0       |
| 0.50604  | 0.26816 | 0.4797  | 2.64132 | 0.20567 | 1.76868 | 0.20571 | 0.00093 |
| 0        | 0       | 0       | 0.00169 | 0.00527 | 0.01257 | 0       | 0       |
| 0        | 0       | 0       | 0       | 0       | 0       | 0       | 0       |
| 0        | 0       | 0.00261 | 2.01495 | 0.18436 | 0.10646 | 0.20533 | 0       |
| 0.08084  | 0.07567 | 0.38187 | 0.00363 | 0       | 0       | 0       | 0       |
| 0        | 0       | 0       | 0.00179 | 0       | 0       | 0.00038 | 0.00093 |
| 0.03784  | 0.06267 | 0.08332 | 0.05188 | 0.00125 | 0.04623 | 0       | 0       |
| 0        | 0       | 0       | 0       | 0       | 0       | 0       | 0       |
| 0        | 0       | 0       | 0.32963 | 0.01478 | 0.14486 | 0       | 0       |
| 0.10281  | 0.04253 | 0       | 0.1231  | 0       | 0       | 0       | 0       |
| 0.13833  | 0.05247 | 0       | 0.1128  | 0       | 1.45856 | 0       | 0       |
| 0        | 0       | 0       | 0       | 0       | 0       | 0       | 0       |
| 0.14623  | 0.03482 | 0.0119  | 0.00185 | 0       | 0       | 0       | 0       |
| 0        | 0       | 0       | 0       | 0       | 0       | 0       | 0       |
| 0        | 0       | 0       | 0       | 0       | 0       | 0       | 0       |
| 12.04554 | 6.74399 | 1.18152 | 2.67239 | 1.58962 | 3.13796 | 3.04956 | 7.79018 |
| 0.25955  | 0.34045 | 0.01821 | 0.20297 | 0.07659 | 0.00614 | 0       | 0       |
| 0        | 0       | 0       | 0       | 0       | 0.00614 | 0       | 0       |
| 0.25955  | 0.34045 | 0.01821 | 0.20297 | 0.07659 | 0       | 0       | 0       |
| 0        | 0       | 0       | 0       | 0       | 0       | 0.16678 | 0.16317 |
| 0        | 0       | 0       | 0       | 0       | 0       | 0.16678 | 0.16317 |
| 0.32431  | 0.44917 | 0.38014 | 0.38978 | 0.36997 | 0.2062  | 0.91625 | 3.27954 |

|         |         |         |         |         |         |         |         |
|---------|---------|---------|---------|---------|---------|---------|---------|
| 0       | 0       | 0.00063 | 0       | 0       | 0.00017 | 0       | 0       |
| 0       | 0       | 0       | 0       | 0       | 0       | 0.00049 | 0       |
| 0       | 0       | 0       | 0.00354 | 0       | 0       | 0       | 0       |
| 0.0546  | 0.05447 | 0.06608 | 0.11238 | 0.02233 | 0.03251 | 0.007   | 0       |
| 0       | 0       | 0       | 0       | 0       | 0       | 0       | 0.0019  |
| 0       | 0       | 0       | 0.00726 | 0       | 0       | 0       | 0       |
| 0.09458 | 0.34822 | 0.09455 | 0.06468 | 0.00589 | 0.09013 | 0.00141 | 0       |
| 0.12355 | 0.03842 | 0.21889 | 0.15625 | 0.32692 | 0.08338 | 0.90735 | 3.27764 |
| 0.05159 | 0.00807 | 0       | 0.04567 | 0.01483 | 0       | 0       | 0       |
| 0       | 0       | 0       | 0       | 0       | 0       | 0       | 0       |
| 0       | 0       | 0       | 0       | 0       | 0       | 0       | 0       |
| 0.0434  | 0.0224  | 0.02991 | 0.30081 | 0.07482 | 0.17704 | 0.06089 | 0.07637 |
| 0.0034  | 0.0003  | 0.00655 | 0.30081 | 0.07482 | 0.17704 | 0.05229 | 0.07637 |
| 0.04    | 0.02211 | 0.02336 | 0       | 0       | 0       | 0.0086  | 0       |
| 0.44222 | 0.20464 | 0.09744 | 0.03563 | 0.00185 | 0       | 0.14619 | 0.05932 |
| 0.22272 | 0.10869 | 0.0311  | 0.03563 | 0.00185 | 0       | 0.12509 | 0.05558 |
| 0.2195  | 0.09595 | 0.06634 | 0       | 0       | 0       | 0       | 0       |
| 0       | 0       | 0       | 0       | 0       | 0       | 0.0211  | 0.00374 |
| 0.02707 | 0       | 0.00219 | 0.02545 | 0.10921 | 0.06487 | 0.11145 | 0.70908 |
| 0       | 0       | 0       | 0.0208  | 0.10353 | 0.06121 | 0.1111  | 0.66843 |
| 0.02707 | 0       | 0.00219 | 0.00466 | 0.00568 | 0.00366 | 0.00036 | 0.04065 |
| 0       | 0       | 0       | 0       | 0       | 0.00099 | 0.00104 | 0.00573 |
| 0       | 0       | 0       | 0       | 0       | 0.00099 | 0.00104 | 0.00573 |
| 1.48929 | 0.17688 | 0       | 0.09822 | 0.00274 | 0.45809 | 0       | 0       |
| 1.48929 | 0.17688 | 0       | 0.09822 | 0.00274 | 0.45809 | 0       | 0       |
| 0       | 0       | 0       | 0       | 0       | 0       | 0       | 0       |
| 0       | 0       | 0       | 0       | 0       | 0       | 0       | 0       |
| 0.22301 | 0.11967 | 0.59348 | 0.74851 | 0.73904 | 0.45394 | 1.63513 | 3.41949 |
| 0.00439 | 0.00014 | 0.00511 | 0.16314 | 0.02961 | 0.01539 | 0.00834 | 0.00792 |
| 0.06166 | 0.01953 | 0.02356 | 0.06447 | 0.024   | 0.05023 | 0.02345 | 0.0195  |
| 0.06044 | 0.01329 | 0.124   | 0.22874 | 0.16211 | 0.25627 | 1.24012 | 1.54596 |
| 0.02979 | 0.02088 | 0.11329 | 0.25008 | 0.46069 | 0.08254 | 0.02056 | 0.00294 |
| 0       | 0       | 0       | 0       | 0       | 0       | 0       | 0       |
| 0       | 0       | 0       | 0       | 0       | 0       | 0       | 0       |
| 0.00356 | 0.00036 | 0.00102 | 0.03515 | 0.01526 | 0.04874 | 0.00234 | 0.00099 |



|         |         |         |         |         |         |         |         |
|---------|---------|---------|---------|---------|---------|---------|---------|
| 0       | 0       | 0       | 0       | 0       | 0       | 0.10472 | 1.35169 |
| 0       | 0       | 0       | 0.00193 | 0.00693 | 0       | 0       | 0.00148 |
| 0.06257 | 0.06547 | 0.32651 | 0.00502 | 0.04044 | 0.00077 | 0.2356  | 0.48901 |
| 0.00059 | 0       | 0       | 0       | 0       | 0       | 0       | 0       |
| 0       | 0       | 0       | 0       | 0       | 0       | 0       | 0       |
| 2.67562 | 0.53132 | 0       | 0       | 0       | 0       | 0       | 0       |
| 1.45521 | 0.15786 | 0.00031 | 0       | 0       | 0       | 0       | 0       |
| 1.45521 | 0.15786 | 0.00031 | 0       | 0       | 0       | 0       | 0       |
| 0       | 0       | 0       | 0       | 0       | 0       | 0       | 0       |
| 0       | 0       | 0       | 0       | 0       | 0       | 0       | 0       |
| 2.67562 | 0.53132 | 0       | 0       | 0       | 0       | 0       | 0       |
| 0       | 0       | 0       | 0       | 0       | 0       | 0       | 0       |
| 0       | 0       | 0       | 0       | 0       | 0       | 0       | 0       |
| 0       | 0       | 0       | 0       | 0       | 0.0016  | 0.00109 | 0.00307 |
| 0       | 0       | 0       | 0       | 0       | 0.0016  | 0.00109 | 0.00307 |
| 0       | 0       | 0       | 0       | 0       | 0       | 0       | 0       |
| 0       | 0       | 0       | 0       | 0       | 0       | 0       | 0       |
| 0       | 0       | 0       | 0       | 0       | 0       | 0       | 0       |
| 0       | 0       | 0       | 0       | 0       | 0       | 0       | 0       |
| 5.1056  | 4.74158 | 0.00238 | 0.84743 | 0       | 1.7376  | 0.00417 | 0       |
| 4.03619 | 4.60057 | 0       | 0.26254 | 0       | 0.58979 | 0       | 0       |
| 0.10501 | 0.0225  | 0       | 0.19303 | 0       | 0.07667 | 0       | 0       |
| 0.01713 | 0.0021  | 0       | 0.01951 | 0       | 1.07113 | 0       | 0       |
| 0.94694 | 0.11641 | 0.00238 | 0.37236 | 0       | 0       | 0.00417 | 0       |
| 0       | 0       | 0       | 0       | 0       | 0       | 0       | 0       |
| 0.00033 | 0       | 0       | 0       | 0       | 0       | 0       | 0       |
| 0       | 0       | 0.05745 | 0.02357 | 0.21539 | 0.03151 | 0.00657 | 0.07439 |
| 0       | 0       | 0.05745 | 0.02357 | 0.21539 | 0.03151 | 0.00657 | 0.07439 |
| 0       | 0       | 0       | 0       | 0       | 0       | 0       | 0       |
| 0       | 0       | 0       | 0       | 0       | 0       | 0       | 0       |
| 0       | 0       | 0       | 0       | 0       | 0       | 0       | 0       |
| 0       | 0       | 0       | 0       | 0       | 0       | 0       | 0       |
| 0.00025 | 0       | 0       | 0       | 0       | 0       | 0       | 0       |
| 0.00025 | 0       | 0       | 0       | 0       | 0       | 0       | 0       |

|         |         |         |         |         |         |         |          |
|---------|---------|---------|---------|---------|---------|---------|----------|
| 0       | 0       | 0       | 0       | 0       | 0       | 0.83472 | 0.61613  |
| 0       | 0       | 0       | 0       | 0       | 0       | 0.83472 | 0.61613  |
| 0       | 0       | 0       | 0       | 0       | 0       | 0.83472 | 0.61578  |
| 0       | 0       | 0       | 0       | 0       | 0       | 0       | 0.00035  |
| 0       | 0.00135 | 0.03229 | 0       | 0.0454  | 0.02548 | 0.30877 | 0.05477  |
| 0       | 0       | 0       | 0       | 0       | 0       | 0.30877 | 0.05477  |
| 0       | 0       | 0       | 0       | 0       | 0       | 0.30877 | 0.05477  |
| 0       | 0       | 0       | 0       | 0       | 0       | 0       | 0        |
| 0       | 0       | 0       | 0       | 0       | 0       | 0       | 0        |
| 0       | 0       | 0.03229 | 0       | 0.0155  | 0.02548 | 0       | 0        |
| 0       | 0       | 0.03229 | 0       | 0.0155  | 0.02548 | 0       | 0        |
| 0       | 0       | 0       | 0       | 0       | 0       | 0       | 0        |
| 0       | 0       | 0       | 0       | 0       | 0       | 0       | 0        |
| 0       | 0       | 0       | 0       | 0       | 0       | 0       | 0        |
| 0       | 0       | 0       | 0       | 0       | 0       | 0       | 0        |
| 0       | 0       | 0       | 0       | 0       | 0       | 0       | 0        |
| 0       | 0.00135 | 0       | 0       | 0.0299  | 0       | 0       | 0        |
| 0       | 0       | 0       | 0       | 0       | 0       | 0       | 0        |
| 0       | 0.00135 | 0       | 0       | 0.0299  | 0       | 0       | 0        |
| 0       | 0       | 0       | 0       | 0       | 0       | 0       | 0        |
| 0       | 0       | 0       | 0       | 0       | 0       | 0       | 0        |
| 0       | 0       | 0       | 0       | 0       | 0       | 0       | 0        |
| 0       | 0       | 0       | 0       | 0       | 0       | 0       | 0        |
| 6.83319 | 5.72229 | 8.35424 | 4.39728 | 2.58653 | 2.70599 | 5.04169 | 14.96194 |
| 0.10757 | 0.08665 | 0.27755 | 0.05324 | 0       | 0.12313 | 0.00738 | 0        |
| 0.10757 | 0.08665 | 0.27755 | 0.05324 | 0       | 0.12313 | 0.00738 | 0        |
| 0       | 0       | 0       | 0.00033 | 0.00159 | 0       | 0.00066 | 0.00569  |
| 0       | 0       | 0       | 0.00033 | 0.00159 | 0       | 0.00066 | 0.00569  |
| 0.00058 | 0.00137 | 0.00201 | 0       | 0       | 0       | 0       | 0.00081  |
| 0.00058 | 0.00137 | 0.00201 | 0       | 0       | 0       | 0       | 0.00081  |
| 0.06478 | 0.02244 | 0.01733 | 0.27002 | 0.05112 | 0.00976 | 0.24661 | 0.62845  |
| 0.06478 | 0.02244 | 0.01733 | 0.27002 | 0.05112 | 0.00976 | 0.24661 | 0.62845  |
| 4.70961 | 3.9721  | 2.59366 | 2.12451 | 0.6104  | 0.69732 | 3.70079 | 11.29004 |
| 4.70961 | 3.9721  | 2.59366 | 2.12451 | 0.6104  | 0.69732 | 3.70079 | 11.29004 |
| 0.44761 | 0.01726 | 1.92887 | 0.04427 | 0.04656 | 0.14237 | 0.38519 | 0.70803  |
| 0.44761 | 0.01726 | 1.92887 | 0.04427 | 0.04656 | 0.14237 | 0.38519 | 0.70803  |

|         |         |         |         |         |         |         |         |
|---------|---------|---------|---------|---------|---------|---------|---------|
| 0       | 0       | 0       | 0       | 0       | 0       | 0       | 0       |
| 0.04762 | 0.03315 | 0.00289 | 0.14989 | 0.05535 | 1.52458 | 0       | 0       |
| 0.04762 | 0.03315 | 0.00289 | 0.14989 | 0.05535 | 1.52458 | 0       | 0       |
| 0       | 0       | 0       | 0.00342 | 0       | 0.02775 | 0       | 0.00072 |
| 0       | 0       | 0       | 0.00342 | 0       | 0.02775 | 0       | 0.00072 |
| 0.00202 | 0       | 0.00175 | 0.00143 | 0.02294 | 0.00054 | 0       | 0       |
| 0.00113 | 0       | 0.00175 | 0.00085 | 0       | 0.00054 | 0       | 0       |
| 0.00089 | 0       | 0       | 0.00057 | 0.02294 | 0       | 0       | 0       |
| 0.01303 | 0.05396 | 0.026   | 1.56485 | 0.91074 | 0.02556 | 0.27745 | 1.07218 |
| 0.01303 | 0.05396 | 0.026   | 0.00875 | 0.00007 | 0.00887 | 0       | 0       |
| 0       | 0       | 0       | 0.00531 | 0.0136  | 0       | 0.00535 | 0.01512 |
| 0       | 0       | 0       | 1.21743 | 0.00976 | 0.01669 | 0.02979 | 0       |
| 0       | 0       | 0       | 0.00006 | 0       | 0       | 0.24231 | 1.05706 |
| 0       | 0       | 0       | 0.33331 | 0.8873  | 0       | 0       | 0       |
| 1.37568 | 1.4713  | 3.25476 | 0.00912 | 0       | 0       | 0.00083 | 0       |
| 0       | 0       | 0       | 0.00912 | 0       | 0       | 0       | 0       |
| 1.20212 | 1.42996 | 2.96862 | 0       | 0       | 0       | 0.00083 | 0       |
| 0       | 0       | 0       | 0       | 0       | 0       | 0       | 0       |
| 0.17356 | 0.04134 | 0.28614 | 0       | 0       | 0       | 0       | 0       |
| 0       | 0       | 0       | 0       | 0       | 0       | 0       | 0       |
| 0.0647  | 0.06405 | 0.24943 | 0.1762  | 0.88783 | 0.15497 | 0.42278 | 1.25602 |
| 0.0647  | 0.06405 | 0.24943 | 0.1762  | 0.88783 | 0.15497 | 0.42278 | 1.25602 |
| 0.08474 | 0.06441 | 0.57774 | 0.06968 | 0.99824 | 0.08716 | 0.14782 | 0.14044 |
| 0.08474 | 0.06441 | 0.57774 | 0.06968 | 0.99824 | 0.08716 | 0.14782 | 0.14044 |
| 0.08474 | 0.06441 | 0.57774 | 0.06968 | 0.99824 | 0.08716 | 0.14782 | 0.14044 |
| 0       | 0       | 0       | 0       | 0       | 0       | 0       | 0       |
| 0       | 0       | 0       | 0       | 0       | 0       | 0       | 0       |
| 0       | 0       | 0       | 0       | 0       | 0       | 0       | 0       |
| 0       | 0       | 0       | 0       | 0       | 0       | 0       | 0       |
| 0       | 0       | 0       | 0       | 0       | 0       | 0.02326 | 0       |
| 0       | 0       | 0       | 0       | 0       | 0       | 0.02326 | 0       |
| 0.05099 | 0.00543 | 0.26105 | 0.0008  | 0       | 0       | 0       | 0       |
| 0.05099 | 0.00543 | 0.26105 | 0.0008  | 0       | 0       | 0       | 0       |
| 0       | 0       | 0.01869 | 0.00031 | 0       | 0.00428 | 0.03016 | 0.06733 |
| 0       | 0       | 0.01869 | 0.00031 | 0       | 0.00428 | 0.03016 | 0.06733 |

|         |         |         |         |         |         |         |         |
|---------|---------|---------|---------|---------|---------|---------|---------|
| 0       | 0       | 0       | 0       | 0       | 0       | 0       | 0       |
| 0       | 0       | 0       | 0       | 0       | 0       | 0       | 0       |
| 0.02426 | 0.04534 | 0.29801 | 0.03932 | 0.16093 | 0.07572 | 0.09269 | 0.05899 |
| 0.02426 | 0.04369 | 0.03504 | 0       | 0.09315 | 0.02459 | 0       | 0       |
| 0       | 0       | 0       | 0       | 0       | 0       | 0.0026  | 0       |
| 0       | 0.00165 | 0.26297 | 0.03932 | 0.06777 | 0.05113 | 0.0901  | 0.05899 |
| 0       | 0       | 0       | 0       | 0.8155  | 0.00716 | 0       | 0       |
| 0       | 0       | 0       | 0       | 0.8155  | 0.00716 | 0       | 0       |
| 0       | 0       | 0       | 0       | 0       | 0       | 0       | 0       |
| 0       | 0       | 0       | 0       | 0       | 0       | 0       | 0       |
| 0       | 0       | 0       | 0.01508 | 0.01311 | 0       | 0       | 0       |
| 0       | 0       | 0       | 0.01508 | 0.01311 | 0       | 0       | 0       |
| 0.00852 | 0.01364 | 0       | 0       | 0       | 0       | 0       | 0       |
| 0.00852 | 0.01364 | 0       | 0       | 0       | 0       | 0       | 0       |
| 0       | 0       | 0       | 0.01417 | 0.0087  | 0       | 0.00171 | 0.01413 |
| 0       | 0       | 0       | 0.01417 | 0.0087  | 0       | 0.00171 | 0.01413 |
| 0.00098 | 0       | 0       | 0       | 0       | 0       | 0       | 0       |
| 0.00098 | 0       | 0       | 0       | 0       | 0       | 0       | 0       |
| 0       | 0       | 0       | 0       | 0       | 0       | 0       | 0       |
| 0       | 0       | 0       | 0       | 0       | 0       | 0       | 0       |
| 0       | 0       | 0       | 0       | 0       | 0       | 0       | 0       |
| 0       | 0       | 0       | 0       | 0       | 0       | 0       | 0       |
| 0.94228 | 0.59734 | 0.03935 | 1.32303 | 2.01548 | 0.42272 | 0.11853 | 0.58767 |
| 0.94228 | 0.59734 | 0.03935 | 1.32303 | 2.01548 | 0.42272 | 0.11853 | 0.58767 |
| 0.94228 | 0.59734 | 0.03935 | 1.32303 | 2.01548 | 0.42272 | 0.11853 | 0.58767 |
| 0.94228 | 0.59734 | 0.03935 | 1.32303 | 2.01548 | 0.42272 | 0.11853 | 0.58767 |
| 0.45704 | 0.23679 | 0       | 0.05749 | 0.00443 | 0       | 0       | 0       |
| 0.19129 | 0.27553 | 0.00132 | 0       | 0       | 0       | 0       | 0       |
| 0       | 0       | 0       | 0       | 0       | 0       | 0       | 0       |
| 0       | 0       | 0       | 0       | 0       | 0       | 0       | 0       |
| 0       | 0       | 0       | 0       | 0       | 0       | 0       | 0       |
| 0.29395 | 0.0835  | 0.03803 | 1.26554 | 2.01106 | 0.42272 | 0.11853 | 0.58767 |
| 0       | 0.00152 | 0       | 0       | 0       | 0       | 0       | 0       |
| 0       | 0       | 0       | 0       | 0       | 0       | 0       | 0       |
| 0.0088  | 0.04198 | 0.06083 | 0.95154 | 1.34803 | 2.3418  | 1.1032  | 0.57127 |



|         |         |         |         |         |         |         |        |
|---------|---------|---------|---------|---------|---------|---------|--------|
| 0       | 0       | 0       | 0       | 0       | 0       | 0       | 0      |
| 0.00794 | 0.04041 | 0.06083 | 0.01573 | 0       | 0.06507 | 0.20998 | 0.0419 |
| 0.0001  | 0.00334 | 0       | 0.0106  | 0       | 0.05449 | 0.00088 | 0      |
| 0       | 0.00204 | 0       | 0       | 0       | 0       | 0.00907 | 0      |
| 0       | 0       | 0       | 0       | 0       | 0       | 0       | 0      |
| 0.00784 | 0.03263 | 0.06083 | 0.00483 | 0       | 0.01057 | 0.19826 | 0.0419 |
| 0       | 0       | 0       | 0       | 0       | 0       | 0       | 0      |
| 0       | 0       | 0       | 0       | 0       | 0       | 0       | 0      |
| 0       | 0.0024  | 0       | 0.0003  | 0       | 0       | 0.00177 | 0      |
| 0       | 0       | 0       | 0       | 0       | 0       | 0       | 0      |
| 0       | 0.00184 | 0       | 0.00454 | 0.00773 | 0       | 0       | 0      |
| 0       | 0.00184 | 0       | 0.00454 | 0.00773 | 0       | 0       | 0      |
| 0       | 0.00184 | 0       | 0.00454 | 0.00773 | 0       | 0       | 0      |
| 0       | 0       | 0       | 0       | 0       | 0       | 0       | 0      |
| 0       | 0       | 0       | 0       | 0       | 0       | 0       | 0      |
| 0       | 0       | 0       | 0       | 0       | 0       | 0       | 0      |
| 0       | 0       | 0       | 0       | 0       | 0       | 0       | 0      |
| 0       | 0       | 0       | 0       | 0       | 0       | 0       | 0      |
| 0       | 0.00184 | 0       | 0.00454 | 0.00773 | 0       | 0       | 0      |
| 0       | 0.00184 | 0       | 0.00454 | 0.00773 | 0       | 0       | 0      |
| 0       | 0       | 0       | 0       | 0       | 0       | 0       | 0      |
| 0       | 0       | 0       | 0       | 0       | 0       | 0       | 0      |
| 0       | 0       | 0       | 0       | 0       | 0       | 0       | 0      |
| 0       | 0       | 0       | 0       | 0       | 0       | 0       | 0      |
| 0       | 0       | 0       | 0       | 0       | 0       | 0       | 0      |
| 0       | 0       | 0       | 0       | 0       | 0       | 0       | 0      |
| 0.37732 | 1.87531 | 0.40034 | 1.37758 | 0.15461 | 2.00552 | 0       | 0      |
| 0.37732 | 1.87531 | 0.40034 | 1.37758 | 0.15461 | 2.00552 | 0       | 0      |
| 0.37732 | 1.87531 | 0.40034 | 1.37758 | 0.15461 | 2.00552 | 0       | 0      |
| 0.37732 | 1.87531 | 0.40034 | 1.37758 | 0.15461 | 2.00552 | 0       | 0      |
| 0       | 0       | 0       | 0       | 0       | 0       | 0       | 0      |
| 0       | 0       | 0       | 0       | 0       | 0       | 0       | 0      |
| 0.37732 | 1.87531 | 0.40034 | 1.37758 | 0.15461 | 2.00552 | 0       | 0      |
| 0       | 0       | 0       | 0       | 0       | 0       | 0       | 0      |
| 0.37732 | 1.87531 | 0.40034 | 0       | 0       | 0       | 0       | 0      |
| 0       | 0       | 0       | 0       | 0       | 0       | 0       | 0      |













|         |         |          |         |          |         |         |         |
|---------|---------|----------|---------|----------|---------|---------|---------|
| 5.69111 | 3.68217 | 14.86942 | 2.99173 | 12.00023 | 0.00114 | 0.0008  | 0       |
| 5.69111 | 3.68217 | 14.86942 | 2.99173 | 12.00023 | 0.00114 | 0.0008  | 0       |
| 5.69111 | 3.68217 | 14.86942 | 2.99173 | 12.00023 | 0.00114 | 0.0008  | 0       |
| 5.69111 | 3.68217 | 14.86942 | 2.99173 | 12.00023 | 0.00114 | 0.0008  | 0       |
| 5.69111 | 3.68217 | 14.86942 | 2.99173 | 12.00023 | 0.00114 | 0.0008  | 0       |
| 5.69111 | 3.68217 | 14.86942 | 2.99173 | 12.00023 | 0.00114 | 0.0008  | 0       |
| 0       | 0       | 0        | 0       | 0        | 0       | 0.00134 | 0.00278 |
| 0       | 0       | 0        | 0       | 0        | 0       | 0.00134 | 0.00278 |
| 0       | 0       | 0        | 0       | 0        | 0       | 0.00134 | 0.00278 |
| 0       | 0       | 0        | 0       | 0        | 0       | 0.00134 | 0.00278 |
| 0       | 0       | 0        | 0       | 0        | 0       | 0.00134 | 0.00278 |
| 0       | 0       | 0        | 0       | 0        | 0       | 0.00134 | 0.00278 |
| 0       | 0       | 0        | 0       | 0        | 0       | 0.00134 | 0.00278 |
| 0       | 0       | 0        | 0       | 0        | 0       | 0       | 0       |
| 0       | 0       | 0        | 0       | 0        | 0       | 0       | 0       |
| 0       | 0       | 0        | 0       | 0        | 0       | 0       | 0       |
| 0       | 0.06022 | 0        | 0       | 0        | 0       | 0       | 0       |
| 0       | 0.06022 | 0        | 0       | 0        | 0       | 0       | 0       |
| 0       | 0.06022 | 0        | 0       | 0        | 0       | 0       | 0       |
| 0       | 0.06022 | 0        | 0       | 0        | 0       | 0       | 0       |
| 0       | 0.06022 | 0        | 0       | 0        | 0       | 0       | 0       |
| 0       | 0.06022 | 0        | 0       | 0        | 0       | 0       | 0       |
| 0       | 0.06022 | 0        | 0       | 0        | 0       | 0       | 0       |
| 0       | 0       | 0        | 0       | 0        | 0       | 0       | 0       |
| 0       | 0       | 0        | 0       | 0        | 0       | 0       | 0       |
| 0       | 0       | 0        | 0       | 0        | 0       | 0       | 0       |

---

| AP014_3 | AP015_1 | AP015_2 | AP015_3  | AP016_1 | AP016_2 | AP016_3 | AP017_1 |
|---------|---------|---------|----------|---------|---------|---------|---------|
| 100     | 100     | 100     | 99.99793 | 100     | 99.9931 | 100     | 100     |
| 0.33046 | 0.24194 | 2.31275 | 0.02717  | 7.69993 | 1.51122 | 1.00014 | 1.18447 |
| 0.07573 | 0.07188 | 1.66027 | 0.02717  | 7.42573 | 1.49648 | 0.59534 | 0.99697 |
| 0.01159 | 0.01957 | 0.05427 | 0.00102  | 0.03139 | 0.03572 | 0.0416  | 0.00914 |
| 0.01159 | 0.01957 | 0.05427 | 0.00102  | 0.03139 | 0.03572 | 0.0416  | 0.00914 |
| 0       | 0       | 0       | 0        | 0.00069 | 0       | 0       | 0       |
| 0       | 0       | 0       | 0        | 0.00069 | 0       | 0       | 0       |
| 0.01159 | 0.01957 | 0.05427 | 0.00102  | 0.03071 | 0.03572 | 0.0416  | 0.00914 |
| 0       | 0.00024 | 0.00147 | 0        | 0.00057 | 0       | 0       | 0       |
| 0       | 0       | 0       | 0        | 0       | 0       | 0.00465 | 0       |
| 0       | 0       | 0       | 0        | 0       | 0       | 0       | 0       |
| 0       | 0       | 0       | 0        | 0       | 0       | 0       | 0       |
| 0       | 0       | 0       | 0        | 0       | 0       | 0       | 0       |
| 0       | 0       | 0       | 0        | 0       | 0       | 0       | 0       |
| 0.01015 | 0.00391 | 0.00949 | 0        | 0.00699 | 0.01539 | 0.00312 | 0.00457 |
| 0       | 0       | 0       | 0        | 0       | 0       | 0.00075 | 0       |
| 0.00144 | 0       | 0       | 0        | 0.00234 | 0.00417 | 0.00162 | 0.00269 |
| 0       | 0.00056 | 0       | 0        | 0.00057 | 0.00343 | 0       | 0       |
| 0       | 0.00799 | 0.00204 | 0        | 0       | 0       | 0.03056 | 0       |
| 0       | 0.00044 | 0.01155 | 0        | 0.00765 | 0.0022  | 0       | 0       |
| 0       | 0       | 0.00024 | 0        | 0       | 0       | 0       | 0       |
| 0       | 0.00302 | 0.02464 | 0.00102  | 0.01259 | 0.01054 | 0.00065 | 0.00189 |
| 0       | 0       | 0.001   | 0        | 0       | 0       | 0       | 0       |
| 0       | 0.0034  | 0.00384 | 0        | 0       | 0       | 0.00009 | 0       |
| 0       | 0       | 0       | 0        | 0       | 0       | 0.00017 | 0       |
| 0       | 0       | 0       | 0        | 0       | 0       | 0       | 0       |
| 0       | 0.03593 | 1.52595 | 0.00202  | 7.37838 | 1.45871 | 0.55373 | 0.98087 |
| 0       | 0.03593 | 1.52595 | 0.00202  | 7.37838 | 1.45871 | 0.55373 | 0.98087 |
| 0       | 0       | 0       | 0        | 0       | 0       | 0       | 0       |
| 0       | 0       | 0       | 0        | 0       | 0       | 0       | 0       |
| 0       | 0       | 0       | 0        | 0       | 0       | 0       | 0       |
| 0       | 0       | 0       | 0        | 0       | 0       | 0       | 0       |
| 0       | 0.03548 | 1.5051  | 0.00202  | 7.37838 | 1.45871 | 0.55373 | 0.98087 |

|         |         |         |         |         |         |         |         |
|---------|---------|---------|---------|---------|---------|---------|---------|
| 0       | 0.00018 | 0       | 0.00029 | 0       | 0       | 0       | 0.59948 |
| 0       | 0       | 0       | 0       | 0       | 0       | 0       | 0       |
| 0       | 0       | 0       | 0       | 0       | 0       | 0       | 0.16019 |
| 0       | 0       | 0       | 0       | 0       | 0       | 0       | 0.00831 |
| 0       | 0       | 0       | 0       | 0.00149 | 0       | 0.00464 | 0       |
| 0       | 0.01023 | 1.28483 | 0.00173 | 7.35104 | 1.45871 | 0.31434 | 0.15367 |
| 0       | 0.02507 | 0.22027 | 0       | 0.02585 | 0       | 0.23476 | 0.05923 |
| 0       | 0       | 0       | 0       | 0       | 0       | 0       | 0       |
| 0       | 0       | 0       | 0       | 0       | 0       | 0       | 0       |
| 0       | 0.00046 | 0.02085 | 0       | 0       | 0       | 0       | 0       |
| 0       | 0.00046 | 0.02085 | 0       | 0       | 0       | 0       | 0       |
| 0       | 0       | 0.00037 | 0       | 0       | 0       | 0       | 0       |
| 0       | 0       | 0.00037 | 0       | 0       | 0       | 0       | 0       |
| 0       | 0       | 0.00037 | 0       | 0       | 0       | 0       | 0       |
| 0       | 0       | 0.00037 | 0       | 0       | 0       | 0       | 0       |
| 0       | 0       | 0       | 0       | 0       | 0       | 0       | 0       |
| 0       | 0       | 0       | 0       | 0       | 0       | 0       | 0       |
| 0.06413 | 0       | 0.02336 | 0.02413 | 0.00562 | 0.00205 | 0       | 0.00695 |
| 0.06413 | 0       | 0.02336 | 0.02413 | 0.00562 | 0.00205 | 0       | 0.00695 |
| 0.06413 | 0       | 0.02336 | 0.02413 | 0.00562 | 0.00205 | 0       | 0.00695 |
| 0.00278 | 0       | 0       | 0       | 0       | 0       | 0       | 0       |
| 0.00156 | 0       | 0.00215 | 0       | 0       | 0       | 0       | 0       |
| 0.0598  | 0       | 0.0212  | 0.02413 | 0.00562 | 0.00205 | 0       | 0.00695 |
| 0       | 0.01638 | 0.05633 | 0       | 0.01034 | 0       | 0       | 0       |
| 0       | 0.01638 | 0.05633 | 0       | 0.01034 | 0       | 0       | 0       |
| 0       | 0.01638 | 0.05633 | 0       | 0.01034 | 0       | 0       | 0       |
| 0       | 0.01638 | 0.05633 | 0       | 0.01034 | 0       | 0       | 0       |
| 0       | 0       | 0       | 0       | 0       | 0       | 0       | 0       |
| 0       | 0       | 0       | 0       | 0       | 0       | 0       | 0       |
| 0.25473 | 0.17006 | 0.65248 | 0       | 0.2742  | 0.01474 | 0.40481 | 0.1875  |
| 0.12772 | 0.11755 | 0.3596  | 0       | 0.01822 | 0.01218 | 0.39374 | 0.09937 |
| 0       | 0       | 0.00752 | 0       | 0.01674 | 0.01218 | 0.00165 | 0.01048 |
| 0       | 0       | 0.00752 | 0       | 0.01674 | 0.01053 | 0.00165 | 0.01048 |
| 0       | 0       | 0       | 0       | 0       | 0       | 0       | 0       |
| 0       | 0       | 0.00448 | 0       | 0.01205 | 0.00779 | 0.00165 | 0.00875 |

|          |          |          |          |          |          |          |         |
|----------|----------|----------|----------|----------|----------|----------|---------|
| 0        | 0        | 0.00304  | 0        | 0.00469  | 0.00274  | 0        | 0.00173 |
| 0        | 0        | 0        | 0        | 0        | 0.00165  | 0        | 0       |
| 0        | 0        | 0        | 0        | 0        | 0        | 0        | 0       |
| 0        | 0        | 0        | 0        | 0        | 0.00165  | 0        | 0       |
| 0.12772  | 0.11755  | 0.35208  | 0        | 0.00149  | 0        | 0.39209  | 0.0889  |
| 0.12586  | 0.11697  | 0.24456  | 0        | 0.00149  | 0        | 0.39209  | 0.0889  |
| 0.12586  | 0.10601  | 0.21397  | 0        | 0.00149  | 0        | 0.39107  | 0.0879  |
| 0        | 0.00672  | 0.01473  | 0        | 0        | 0        | 0        | 0.00022 |
| 0        | 0.00424  | 0.01586  | 0        | 0        | 0        | 0.00102  | 0.00077 |
| 0.00186  | 0.00058  | 0.10752  | 0        | 0        | 0        | 0        | 0       |
| 0        | 0        | 0.0014   | 0        | 0        | 0        | 0        | 0       |
| 0.00186  | 0.00058  | 0.10612  | 0        | 0        | 0        | 0        | 0       |
| 0.12701  | 0.05251  | 0.29288  | 0        | 0.25598  | 0.00256  | 0.01107  | 0.08813 |
| 0.12701  | 0.05251  | 0.29288  | 0        | 0.25598  | 0.00256  | 0.01107  | 0.08813 |
| 0.01151  | 0        | 0        | 0        | 0        | 0        | 0        | 0       |
| 0.01151  | 0        | 0        | 0        | 0        | 0        | 0        | 0       |
| 0.0017   | 0        | 0        | 0        | 0        | 0        | 0        | 0       |
| 0.0017   | 0        | 0        | 0        | 0        | 0        | 0        | 0       |
| 0.10509  | 0.04691  | 0.2309   | 0        | 0.23544  | 0.00256  | 0.01068  | 0.08291 |
| 0.10509  | 0.04691  | 0.2309   | 0        | 0.23544  | 0.00256  | 0.01068  | 0.08291 |
| 0        | 0        | 0        | 0        | 0        | 0        | 0        | 0       |
| 0        | 0        | 0        | 0        | 0        | 0        | 0        | 0       |
| 0.00871  | 0.00559  | 0.06198  | 0        | 0.01995  | 0        | 0.00039  | 0.00522 |
| 0.00871  | 0.00559  | 0.06198  | 0        | 0.01995  | 0        | 0.00039  | 0.00522 |
| 0        | 0        | 0        | 0        | 0.00058  | 0        | 0        | 0       |
| 0        | 0        | 0        | 0        | 0.00058  | 0        | 0        | 0       |
| 84.89056 | 79.49305 | 38.11772 | 90.0085  | 64.82559 | 82.12959 | 49.32522 | 78.3065 |
| 0        | 0        | 0        | 0        | 0        | 0        | 0        | 0       |
| 0        | 0        | 0        | 0        | 0        | 0        | 0        | 0       |
| 0        | 0        | 0        | 0        | 0        | 0        | 0        | 0       |
| 0        | 0        | 0        | 0        | 0        | 0        | 0        | 0       |
| 0        | 0        | 0        | 0        | 0        | 0        | 0        | 0       |
| 84.89056 | 79.49305 | 38.11772 | 90.0085  | 64.82559 | 82.12959 | 49.32522 | 78.3065 |
| 84.89056 | 79.49305 | 38.11772 | 90.0085  | 64.82559 | 82.12959 | 49.32522 | 78.3065 |
| 71.23631 | 72.29152 | 28.3077  | 89.45041 | 60.97076 | 70.90102 | 48.06776 | 75.9397 |

|          |          |          |          |          |          |          |          |
|----------|----------|----------|----------|----------|----------|----------|----------|
| 71.23631 | 72.29152 | 28.3077  | 89.45041 | 60.97076 | 70.90102 | 48.06776 | 75.9397  |
| 0.31041  | 0.28613  | 0.06615  | 0        | 0        | 0        | 0        | 0.37801  |
| 0.08485  | 0        | 0        | 0        | 0        | 0        | 0        | 0        |
| 0        | 0        | 0        | 0        | 0        | 0        | 0        | 2.75007  |
| 1.44424  | 26.37339 | 9.31941  | 12.94628 | 0.00276  | 0.00563  | 0.00103  | 0.00469  |
| 0        | 0.26623  | 0.27308  | 0        | 0        | 0        | 0        | 0        |
| 0        | 0        | 0        | 0        | 0        | 0        | 0        | 0        |
| 0        | 0        | 0        | 0        | 0        | 0        | 0        | 0        |
| 0        | 0.34269  | 0.10412  | 0        | 0        | 0        | 0        | 0        |
| 14.79649 | 0.02289  | 0.00193  | 0.00124  | 1.23497  | 0.68097  | 1.34597  | 16.31488 |
| 17.93974 | 0        | 0        | 0        | 0        | 0        | 0        | 0.01353  |
| 0        | 3.35361  | 1.39286  | 2.4066   | 0        | 0        | 0        | 0        |
| 0.1203   | 0        | 0.00135  | 0        | 0.10745  | 0.00878  | 0.01652  | 0        |
| 0.6417   | 0.11031  | 0.07925  | 0.01344  | 0        | 0        | 0        | 4.90614  |
| 2.65937  | 5.73385  | 0.65194  | 48.80892 | 0.0004   | 0.00186  | 0.00276  | 0        |
| 0        | 0.04884  | 0.07041  | 0        | 0        | 0        | 0        | 0        |
| 0        | 0        | 0        | 0        | 0        | 0        | 0        | 0        |
| 1.68767  | 0        | 0.00465  | 0        | 0        | 0        | 0        | 0        |
| 9.73317  | 16.64277 | 11.56074 | 18.97444 | 0.00217  | 0.00593  | 0.00152  | 4.97372  |
| 6.7793   | 0.59188  | 0.61056  | 0.01011  | 14.36695 | 0.38301  | 1.1733   | 18.88773 |
| 15.01483 | 1.45689  | 1.71212  | 0.00038  | 0.71504  | 0.03061  | 0.84227  | 0.42752  |
| 0.00945  | 16.91848 | 2.41408  | 0.72306  | 42.59127 | 68.67609 | 42.96872 | 27.277   |
| 0.01478  | 0.14359  | 0.04505  | 5.56595  | 1.94974  | 1.10813  | 1.71566  | 0.00641  |
| 0.05565  | 0.05322  | 0.19109  | 0        | 0        | 0        | 0        | 0        |
| 0        | 0.05322  | 0.19109  | 0        | 0        | 0        | 0        | 0        |
| 0        | 0.05322  | 0.19109  | 0        | 0        | 0        | 0        | 0        |
| 0.05565  | 0        | 0        | 0        | 0        | 0        | 0        | 0        |
| 0        | 0        | 0        | 0        | 0        | 0        | 0        | 0        |
| 0.05565  | 0        | 0        | 0        | 0        | 0        | 0        | 0        |
| 2.4802   | 1.84036  | 1.49513  | 0        | 0        | 0        | 0        | 0.07504  |
| 1.21375  | 1.66477  | 1.3199   | 0        | 0        | 0        | 0        | 0.07504  |
| 0.00142  | 1.05109  | 0.80669  | 0        | 0        | 0        | 0        | 0.0377   |
| 1.21233  | 0.61368  | 0.5132   | 0        | 0        | 0        | 0        | 0.03734  |
| 1.26645  | 0.17559  | 0.17523  | 0        | 0        | 0        | 0        | 0        |
| 0        | 0        | 0        | 0        | 0        | 0        | 0        | 0        |



|         |         |         |   |         |   |         |         |
|---------|---------|---------|---|---------|---|---------|---------|
| 1.26645 | 0.17559 | 0.17523 | 0 | 0       | 0 | 0       | 0       |
| 0       | 0       | 0       | 0 | 0       | 0 | 0       | 0.00071 |
| 0       | 0       | 0       | 0 | 0       | 0 | 0       | 0.00071 |
| 0       | 0       | 0       | 0 | 0       | 0 | 0       | 0       |
| 0       | 0       | 0       | 0 | 0       | 0 | 0       | 0.00071 |
| 0       | 0       | 0       | 0 | 0       | 0 | 0       | 0       |
| 0       | 0       | 0       | 0 | 0       | 0 | 0       | 0       |
| 0       | 0       | 0       | 0 | 0       | 0 | 0       | 0       |
| 0.00089 | 0.37418 | 0.09393 | 0 | 0.00054 | 0 | 0       | 0.04802 |
| 0       | 0       | 0       | 0 | 0       | 0 | 0       | 0.02291 |
| 0       | 0       | 0       | 0 | 0       | 0 | 0       | 0.02291 |
| 0       | 0.16076 | 0.08678 | 0 | 0       | 0 | 0       | 0       |
| 0       | 0       | 0       | 0 | 0       | 0 | 0       | 0       |
| 0       | 0.16076 | 0.08678 | 0 | 0       | 0 | 0       | 0       |
| 0.00089 | 0.21342 | 0.00714 | 0 | 0.00054 | 0 | 0       | 0.0251  |
| 0.00089 | 0.21342 | 0.00714 | 0 | 0.00054 | 0 | 0       | 0       |
| 0       | 0       | 0       | 0 | 0       | 0 | 0       | 0       |
| 0       | 0       | 0       | 0 | 0       | 0 | 0       | 0       |
| 0       | 0       | 0       | 0 | 0       | 0 | 0       | 0       |
| 0       | 0       | 0       | 0 | 0       | 0 | 0       | 0       |
| 0       | 0       | 0       | 0 | 0       | 0 | 0       | 0.00038 |
| 0       | 0       | 0       | 0 | 0       | 0 | 0       | 0       |
| 0       | 0       | 0       | 0 | 0       | 0 | 0       | 0.00426 |
| 0       | 0       | 0       | 0 | 0       | 0 | 0       | 0.00012 |
| 0       | 0       | 0       | 0 | 0       | 0 | 0       | 0       |
| 0       | 0       | 0       | 0 | 0       | 0 | 0       | 0.00049 |
| 0       | 0       | 0       | 0 | 0       | 0 | 0       | 0.01901 |
| 0       | 0       | 0       | 0 | 0       | 0 | 0       | 0.00084 |
| 0       | 0       | 0       | 0 | 0       | 0 | 0       | 0       |
| 0       | 0       | 0       | 0 | 0       | 0 | 0       | 0       |
| 0       | 0       | 0       | 0 | 0       | 0 | 0       | 0       |
| 0       | 0       | 0       | 0 | 0       | 0 | 0       | 0       |
| 0       | 0       | 0       | 0 | 0       | 0 | 0       | 0       |
| 0       | 0       | 0       | 0 | 0       | 0 | 0       | 0       |
| 0       | 0       | 0       | 0 | 0       | 0 | 0       | 0       |
| 0       | 0       | 0       | 0 | 0       | 0 | 0       | 0       |
| 7.62715 | 0.20501 | 0.81063 | 0 | 0.06224 | 0 | 0.00075 | 0.8665  |
| 7.62715 | 0.20501 | 0.81063 | 0 | 0.06224 | 0 | 0.00075 | 0.8665  |

|         |         |          |         |         |          |          |          |
|---------|---------|----------|---------|---------|----------|----------|----------|
| 0.4079  | 0.18663 | 0.62944  | 0       | 0       | 0        | 0        | 0.00386  |
| 0.06747 | 0.0031  | 0        | 0       | 0.06224 | 0        | 0.00075  | 0.00487  |
| 0       | 0       | 0        | 0       | 0       | 0        | 0        | 0.00907  |
| 3.62123 | 0       | 0        | 0       | 0       | 0        | 0        | 0.68654  |
| 3.53054 | 0.01528 | 0.18118  | 0       | 0       | 0        | 0        | 0.16217  |
| 0       | 0       | 0        | 0       | 0       | 0        | 0        | 0        |
| 3.49036 | 4.72875 | 7.21926  | 0.55809 | 3.79206 | 11.22857 | 1.25671  | 1.37653  |
| 3.49036 | 4.72875 | 7.21926  | 0.55809 | 3.79206 | 11.22857 | 1.25671  | 1.37653  |
| 2.43429 | 3.89968 | 6.54178  | 0.24576 | 3.79206 | 11.22857 | 1.25671  | 1.16159  |
| 0.24284 | 0.39053 | 0.60139  | 0       | 0       | 0        | 0        | 0.21494  |
| 0.59147 | 0.00592 | 0.00189  | 0       | 0       | 0        | 0        | 0        |
| 0       | 0.20637 | 0.04843  | 0.31233 | 0       | 0        | 0        | 0        |
| 0.21784 | 0.22625 | 0.02577  | 0       | 0       | 0        | 0        | 0        |
| 0.00392 | 0       | 0        | 0       | 0       | 0        | 0        | 0        |
| 0       | 0       | 0        | 0       | 0       | 0        | 0        | 0        |
| 0       | 0       | 0        | 0       | 0       | 0        | 0        | 0        |
| 0       | 0       | 0        | 0       | 0       | 0        | 0        | 0        |
| 0       | 0       | 0        | 0       | 0       | 0        | 0        | 0        |
| 0       | 0       | 0        | 0       | 0       | 0        | 0        | 0        |
| 0       | 0       | 0        | 0       | 0       | 0        | 0        | 0        |
| 14.4336 | 15.316  | 57.46831 | 3.00713 | 8.72926 | 2.21131  | 32.44653 | 19.17693 |
| 0.34241 | 0.09054 | 0.37308  | 0.14174 | 0.52628 | 0.60341  | 3.14806  | 1.74047  |
| 0.00458 | 0.00554 | 0.00772  | 0.0017  | 0.00631 | 0.00243  | 0.00345  | 0.00339  |
| 0.00458 | 0.00554 | 0.00772  | 0.0017  | 0.00631 | 0.00243  | 0.00345  | 0.00339  |
| 0.00458 | 0.00554 | 0.00772  | 0.0017  | 0.00631 | 0.00243  | 0.00345  | 0.00339  |
| 0       | 0.00017 | 0        | 0       | 0       | 0        | 0        | 0        |
| 0       | 0       | 0.0006   | 0       | 0       | 0        | 0        | 0        |
| 0       | 0       | 0        | 0       | 0.00039 | 0        | 0.00225  | 0        |
| 0.00458 | 0.00536 | 0.00712  | 0.0017  | 0.00591 | 0.00243  | 0.00121  | 0.00339  |
| 0.33783 | 0.08501 | 0.36537  | 0.14004 | 0.51997 | 0.60097  | 3.14461  | 1.73709  |
| 0       | 0       | 0        | 0       | 0       | 0.00902  | 0        | 0        |
| 0       | 0       | 0        | 0       | 0       | 0.00902  | 0        | 0        |
| 0       | 0       | 0        | 0       | 0       | 0.00269  | 0        | 0        |
| 0       | 0       | 0        | 0       | 0       | 0.00633  | 0        | 0        |
| 0       | 0       | 0.00199  | 0       | 0.00222 | 0.00199  | 0        | 0.02151  |



|         |          |          |         |         |         |          |          |
|---------|----------|----------|---------|---------|---------|----------|----------|
| 0.04013 | 0.08501  | 0.08501  | 0.14004 | 0.12042 | 0.31404 | 3.14461  | 1.71558  |
| 0.02652 | 0        | 0        | 0       | 0       | 0       | 0        | 0.04085  |
| 0.01361 | 0        | 0        | 0.00191 | 0       | 0.00735 | 0        | 0        |
| 0       | 0        | 0        | 0       | 0       | 0       | 0        | 0        |
| 0       | 0        | 0        | 0       | 0       | 0       | 0        | 0        |
| 0       | 0        | 0        | 0       | 0       | 0       | 0.00133  | 0        |
| 0       | 0.0005   | 0.0135   | 0.1377  | 0.06723 | 0.02421 | 0        | 0.33061  |
| 0       | 0        | 0        | 0       | 0       | 0       | 0        | 0        |
| 0       | 0        | 0        | 0       | 0       | 0       | 0        | 0        |
| 0       | 0.00022  | 0        | 0       | 0.00362 | 0.00476 | 0        | 0.01342  |
| 0       | 0        | 0.00101  | 0       | 0       | 0       | 0        | 0        |
| 0       | 0        | 0.00216  | 0       | 0       | 0       | 0.00556  | 0.06401  |
| 0       | 0.00638  | 0.00529  | 0       | 0.01225 | 0.27738 | 0.15385  | 0.40845  |
| 0       | 0        | 0        | 0       | 0       | 0       | 0        | 0.00631  |
| 0       | 0        | 0        | 0       | 0       | 0       | 0        | 0        |
| 0       | 0.07791  | 0.06212  | 0       | 0.03732 | 0       | 2.98387  | 0.84208  |
| 0       | 0        | 0.00094  | 0.00042 | 0       | 0       | 0        | 0        |
| 0       | 0        | 0        | 0       | 0       | 0       | 0        | 0        |
| 0       | 0        | 0        | 0       | 0       | 0       | 0        | 0        |
| 0       | 0        | 0        | 0       | 0       | 0       | 0        | 0        |
| 0       | 0        | 0        | 0       | 0       | 0       | 0        | 0        |
| 0       | 0        | 0        | 0       | 0       | 0.00034 | 0        | 0.00499  |
| 0       | 0        | 0        | 0       | 0       | 0       | 0        | 0        |
| 0       | 0        | 0        | 0       | 0       | 0       | 0        | 0.00131  |
| 0       | 0        | 0        | 0       | 0       | 0       | 0        | 0        |
| 0       | 0        | 0        | 0       | 0       | 0       | 0        | 0        |
| 0       | 0        | 0        | 0       | 0       | 0       | 0        | 0.00355  |
| 0       | 0        | 0        | 0       | 0       | 0       | 0        | 0        |
| 12.2366 | 12.32203 | 50.72403 | 1.67223 | 5.37645 | 1.29796 | 27.11746 | 11.17106 |
| 12.2366 | 12.32203 | 50.72403 | 1.67223 | 5.37645 | 1.29796 | 27.11746 | 11.17106 |
| 0       | 0.00567  | 0.05147  | 0       | 0       | 0       | 0        | 0        |
| 0       | 0.00567  | 0.05147  | 0       | 0       | 0       | 0        | 0        |
| 0       | 0.00567  | 0.05147  | 0       | 0       | 0       | 0        | 0        |
| 0.00251 | 0.00075  | 0.03018  | 0       | 0       | 0       | 0        | 0        |

|         |         |         |         |         |         |         |         |
|---------|---------|---------|---------|---------|---------|---------|---------|
| 0.00251 | 0.00075 | 0.03018 | 0       | 0       | 0       | 0       | 0       |
| 0.00251 | 0.00075 | 0.03018 | 0       | 0       | 0       | 0       | 0       |
| 0.21002 | 3.19601 | 7.14766 | 0.022   | 0.51105 | 0.09447 | 0.17283 | 0.09    |
| 0       | 0       | 0       | 0       | 0       | 0       | 0       | 0       |
| 0       | 0       | 0       | 0       | 0       | 0       | 0       | 0       |
| 0.12316 | 0.49935 | 2.41448 | 0.022   | 0.50057 | 0.02534 | 0.13601 | 0.08397 |
| 0       | 0       | 0       | 0       | 0       | 0       | 0       | 0       |
| 0.05766 | 0.02724 | 0.67399 | 0.00247 | 0.50057 | 0.02534 | 0.05309 | 0.00037 |
| 0       | 0       | 0       | 0.01953 | 0       | 0       | 0       | 0.08359 |
| 0       | 0       | 0       | 0       | 0       | 0       | 0.00146 | 0       |
| 0       | 0       | 0       | 0       | 0       | 0       | 0.07889 | 0       |
| 0       | 0       | 0       | 0       | 0       | 0       | 0       | 0       |
| 0       | 0       | 0       | 0       | 0       | 0       | 0       | 0       |
| 0       | 0       | 0       | 0       | 0       | 0       | 0.00257 | 0       |
| 0       | 0       | 0.00023 | 0       | 0       | 0       | 0       | 0       |
| 0.0655  | 0.26482 | 0.06793 | 0       | 0       | 0       | 0       | 0       |
| 0       | 0       | 0       | 0       | 0       | 0       | 0       | 0       |
| 0       | 0.05604 | 1.62959 | 0       | 0       | 0       | 0       | 0       |
| 0       | 0.15125 | 0.04274 | 0       | 0       | 0       | 0       | 0       |
| 0       | 0       | 0       | 0       | 0       | 0       | 0       | 0       |
| 0       | 0       | 0       | 0       | 0       | 0       | 0       | 0       |
| 0.08686 | 2.69666 | 4.73318 | 0       | 0.01048 | 0.06913 | 0.03682 | 0.00603 |
| 0       | 0       | 0       | 0       | 0       | 0       | 0       | 0       |
| 0.08686 | 2.69666 | 4.73318 | 0       | 0.01048 | 0.06913 | 0.03682 | 0.00603 |
| 0       | 0       | 0       | 0       | 0       | 0       | 0       | 0       |
| 0       | 0       | 0       | 0       | 0       | 0       | 0       | 0       |
| 0       | 0.00097 | 0.01638 | 0       | 0.00147 | 0       | 0       | 0.00068 |
| 0       | 0       | 0.00495 | 0       | 0       | 0       | 0       | 0.00068 |
| 0       | 0       | 0.00018 | 0       | 0       | 0       | 0       | 0       |
| 0       | 0       | 0       | 0       | 0       | 0       | 0       | 0       |
| 0       | 0       | 0       | 0       | 0       | 0       | 0       | 0       |
| 0       | 0       | 0.00477 | 0       | 0       | 0       | 0       | 0.00068 |
| 0       | 0.00097 | 0.01142 | 0       | 0.00147 | 0       | 0       | 0       |
| 0       | 0.00097 | 0.01142 | 0       | 0.00147 | 0       | 0       | 0       |
| 0.23793 | 0.00544 | 0.09279 | 0       | 0       | 0       | 0.00617 | 0       |

|         |         |          |         |         |         |          |         |
|---------|---------|----------|---------|---------|---------|----------|---------|
| 0.04054 | 0       | 0.03143  | 0       | 0       | 0       | 0.00617  | 0       |
| 0.04054 | 0       | 0.03143  | 0       | 0       | 0       | 0.00617  | 0       |
| 0.185   | 0       | 0        | 0       | 0       | 0       | 0        | 0       |
| 0.185   | 0       | 0        | 0       | 0       | 0       | 0        | 0       |
| 0.01238 | 0.00544 | 0.06135  | 0       | 0       | 0       | 0        | 0       |
| 0.01238 | 0.00544 | 0.06135  | 0       | 0       | 0       | 0        | 0       |
| 0       | 0       | 0        | 0       | 0       | 0       | 0        | 0       |
| 0       | 0       | 0        | 0       | 0       | 0       | 0        | 0       |
| 0.00217 | 0.18713 | 0.75982  | 0       | 0       | 0       | 16.71792 | 0.70931 |
| 0       | 0       | 0.03293  | 0       | 0       | 0       | 0        | 0       |
| 0       | 0       | 0.03293  | 0       | 0       | 0       | 0        | 0       |
| 0       | 0       | 0        | 0       | 0       | 0       | 0        | 0       |
| 0       | 0       | 0        | 0       | 0       | 0       | 0        | 0       |
| 0.00217 | 0.18713 | 0.72689  | 0       | 0       | 0       | 16.71792 | 0.70931 |
| 0       | 0.00171 | 0.0041   | 0       | 0       | 0       | 0        | 0       |
| 0       | 0.03909 | 0.00726  | 0       | 0       | 0       | 0        | 0       |
| 0       | 0.06037 | 0.26667  | 0       | 0       | 0       | 0        | 0.40796 |
| 0       | 0       | 0        | 0       | 0       | 0       | 0.06868  | 0.00131 |
| 0.00217 | 0       | 0.00573  | 0       | 0       | 0       | 0        | 0       |
| 0       | 0       | 0        | 0       | 0       | 0       | 0        | 0       |
| 0       | 0       | 0        | 0       | 0       | 0       | 0        | 0       |
| 0       | 0       | 0        | 0       | 0       | 0       | 0        | 0       |
| 0       | 0       | 0        | 0       | 0       | 0       | 0.16873  | 0       |
| 0       | 0.08597 | 0.44312  | 0       | 0       | 0       | 16.48051 | 0.30004 |
| 0       | 0       | 0        | 0       | 0       | 0       | 0        | 0       |
| 0       | 0       | 0        | 0       | 0       | 0       | 0        | 0       |
| 0       | 0       | 0        | 0       | 0       | 0       | 0        | 0       |
| 0       | 0       | 0        | 0       | 0       | 0       | 0        | 0       |
| 3.92776 | 3.94281 | 28.62468 | 1.18002 | 2.91556 | 1.15963 | 8.47954  | 3.20554 |
| 0       | 0.03443 | 0.09251  | 0       | 0       | 0       | 0.29297  | 0.0561  |
| 0       | 0       | 0        | 0       | 0       | 0       | 0        | 0       |
| 0       | 0.03443 | 0.09251  | 0       | 0       | 0       | 0.29297  | 0.0561  |
| 0.03756 | 0.16978 | 0.03127  | 0       | 0       | 0       | 0        | 0       |
| 0.03756 | 0.16978 | 0.03127  | 0       | 0       | 0       | 0        | 0       |
| 0.1389  | 3.1906  | 20.36197 | 1.09041 | 1.34375 | 1.00693 | 1.62846  | 1.39028 |

|         |         |          |         |         |         |         |         |
|---------|---------|----------|---------|---------|---------|---------|---------|
| 0       | 0       | 0.0017   | 0       | 0       | 0       | 0       | 0       |
| 0       | 0.29296 | 5.90567  | 0       | 0       | 0.00019 | 0.01107 | 0       |
| 0.00148 | 0       | 0        | 0       | 0       | 0       | 0       | 0       |
| 0.01333 | 0       | 0.0008   | 0       | 0       | 0       | 0       | 0       |
| 0.01644 | 0.00126 | 0.00364  | 0       | 0       | 0       | 0       | 0       |
| 0       | 0.32098 | 0.4925   | 1.08981 | 0       | 0       | 0       | 0       |
| 0.0015  | 0.00092 | 0.00391  | 0       | 0       | 0       | 0.19964 | 0.00396 |
| 0.10614 | 2.57448 | 13.95374 | 0.0006  | 1.34375 | 1.00674 | 1.41775 | 1.38632 |
| 0       | 0       | 0        | 0       | 0       | 0       | 0       | 0       |
| 0       | 0       | 0        | 0       | 0       | 0       | 0       | 0       |
| 0       | 0       | 0        | 0       | 0       | 0       | 0       | 0       |
| 0.49819 | 0       | 0        | 0       | 0       | 0       | 0       | 0       |
| 0.49355 | 0       | 0        | 0       | 0       | 0       | 0       | 0       |
| 0.00464 | 0       | 0        | 0       | 0       | 0       | 0       | 0       |
| 0       | 0.07187 | 0.04118  | 0       | 0       | 0       | 0.55265 | 0       |
| 0       | 0.05333 | 0.03816  | 0       | 0       | 0       | 0.32399 | 0       |
| 0       | 0.01854 | 0.00302  | 0       | 0       | 0       | 0.22866 | 0       |
| 0       | 0       | 0        | 0       | 0       | 0       | 0       | 0       |
| 0.05745 | 0.01188 | 0.00114  | 0       | 0       | 0       | 0       | 0       |
| 0.00697 | 0.00284 | 0.00034  | 0       | 0       | 0       | 0       | 0       |
| 0.05048 | 0.00904 | 0.0008   | 0       | 0       | 0       | 0       | 0       |
| 0.00474 | 0       | 0        | 0       | 0       | 0       | 0       | 0       |
| 0.00474 | 0       | 0        | 0       | 0       | 0       | 0       | 0       |
| 0       | 0.0099  | 0.08742  | 0       | 0       | 0       | 0.95159 | 0.05689 |
| 0       | 0.0099  | 0.08742  | 0       | 0       | 0       | 0.95159 | 0.05689 |
| 0       | 0       | 0        | 0       | 0       | 0       | 0       | 0.00029 |
| 0       | 0       | 0        | 0       | 0       | 0       | 0       | 0.00029 |
| 3.16381 | 0.28895 | 6.52071  | 0.08961 | 1.35516 | 0.08186 | 0.15188 | 0.26737 |
| 0.00234 | 0.06641 | 0.15937  | 0       | 0       | 0       | 0.01537 | 0.00483 |
| 0.02373 | 0       | 0        | 0       | 0       | 0       | 0       | 0       |
| 1.97257 | 0.10914 | 4.31234  | 0.08961 | 1.35516 | 0.08186 | 0.13651 | 0.2549  |
| 0.02933 | 0.02371 | 0.63182  | 0       | 0       | 0       | 0       | 0.00233 |
| 0       | 0       | 0        | 0       | 0       | 0       | 0       | 0       |
| 0       | 0       | 0        | 0       | 0       | 0       | 0       | 0       |
| 0.00421 | 0.00012 | 0.24297  | 0       | 0       | 0       | 0       | 0.00531 |

|         |         |         |   |         |         |         |         |
|---------|---------|---------|---|---------|---------|---------|---------|
| 1.04247 | 0       | 0       | 0 | 0       | 0       | 0       | 0       |
| 0.00031 | 0.00012 | 0.00046 | 0 | 0       | 0       | 0       | 0       |
| 0.08884 | 0.08945 | 1.17375 | 0 | 0       | 0       | 0       | 0       |
| 0       | 0       | 0       | 0 | 0       | 0       | 0       | 0       |
| 0       | 0       | 0       | 0 | 0       | 0       | 0       | 0       |
| 0       | 0       | 0       | 0 | 0       | 0       | 0       | 0       |
| 0       | 0.01873 | 0.02598 | 0 | 0       | 0       | 0.25482 | 0       |
| 0       | 0.01685 | 0.02598 | 0 | 0       | 0       | 0.25482 | 0       |
| 0       | 0       | 0       | 0 | 0       | 0       | 0       | 0       |
| 0       | 0.00189 | 0       | 0 | 0       | 0       | 0       | 0       |
| 0       | 0       | 0       | 0 | 0       | 0       | 0       | 0       |
| 0       | 0       | 0       | 0 | 0       | 0       | 0       | 0       |
| 0       | 0       | 0       | 0 | 0       | 0       | 0       | 0       |
| 0       | 0       | 0       | 0 | 0       | 0       | 0       | 0       |
| 0       | 0       | 0       | 0 | 0       | 0       | 0       | 0       |
| 0       | 0       | 0.00181 | 0 | 0       | 0       | 0       | 0.00011 |
| 0       | 0       | 0       | 0 | 0       | 0       | 0       | 0       |
| 0       | 0       | 0.00181 | 0 | 0       | 0       | 0       | 0.00011 |
| 0       | 0       | 0       | 0 | 0.00233 | 0.01412 | 0       | 0       |
| 0       | 0       | 0       | 0 | 0.00233 | 0.01412 | 0       | 0       |
| 0       | 0.00358 | 0.01326 | 0 | 0       | 0       | 4.45118 | 0.97227 |
| 0       | 0       | 0       | 0 | 0       | 0       | 0.00807 | 0       |
| 0       | 0       | 0       | 0 | 0       | 0       | 0.00198 | 0       |
| 0       | 0       | 0       | 0 | 0       | 0       | 4.42569 | 0       |
| 0       | 0.00358 | 0.01326 | 0 | 0       | 0       | 0.01545 | 0.97227 |
| 0       | 0       | 0       | 0 | 0       | 0       | 0       | 0       |
| 0       | 0       | 0       | 0 | 0       | 0       | 0       | 0       |
| 0.02711 | 0       | 1.41542 | 0 | 0       | 0       | 0       | 0       |
| 0.02711 | 0       | 1.41542 | 0 | 0       | 0       | 0       | 0       |
| 0       | 0       | 0       | 0 | 0       | 0       | 0       | 0       |
| 0       | 0       | 0       | 0 | 0       | 0       | 0       | 0       |
| 0       | 0       | 0       | 0 | 0       | 0       | 0       | 0       |
| 0       | 0       | 0       | 0 | 0       | 0       | 0       | 0       |
| 0       | 0.14309 | 0.03199 | 0 | 0.21432 | 0.05672 | 0.19599 | 0.46222 |
| 0       | 0.14309 | 0.03199 | 0 | 0.21432 | 0.05672 | 0.19599 | 0.46222 |



|         |         |          |         |         |         |         |         |
|---------|---------|----------|---------|---------|---------|---------|---------|
| 0.53192 | 0.19054 | 3.3714   | 0       | 0       | 0       | 0       | 0       |
| 0.53192 | 0.19054 | 3.3714   | 0       | 0       | 0       | 0       | 0       |
| 0.53192 | 0       | 0        | 0       | 0       | 0       | 0       | 0       |
| 0       | 0.19054 | 3.3714   | 0       | 0       | 0       | 0       | 0       |
| 0.15723 | 0       | 0.00577  | 0       | 0.00195 | 0       | 0.00754 | 0.03892 |
| 0.15723 | 0       | 0        | 0       | 0       | 0       | 0       | 0       |
| 0.15723 | 0       | 0        | 0       | 0       | 0       | 0       | 0       |
| 0       | 0       | 0        | 0       | 0       | 0       | 0       | 0       |
| 0       | 0       | 0        | 0       | 0       | 0       | 0       | 0       |
| 0       | 0       | 0.00523  | 0       | 0       | 0       | 0.00754 | 0       |
| 0       | 0       | 0.00523  | 0       | 0       | 0       | 0.00754 | 0       |
| 0       | 0       | 0        | 0       | 0       | 0       | 0       | 0       |
| 0       | 0       | 0        | 0       | 0       | 0       | 0       | 0       |
| 0       | 0       | 0        | 0       | 0       | 0       | 0       | 0       |
| 0       | 0       | 0        | 0       | 0       | 0       | 0       | 0       |
| 0       | 0       | 0        | 0       | 0       | 0       | 0       | 0       |
| 0       | 0       | 0.00054  | 0       | 0.00195 | 0       | 0       | 0.03892 |
| 0       | 0       | 0        | 0       | 0       | 0       | 0       | 0       |
| 0       | 0       | 0.00054  | 0       | 0.00195 | 0       | 0       | 0.03892 |
| 0       | 0       | 0        | 0       | 0       | 0       | 0       | 0       |
| 0       | 0       | 0        | 0       | 0       | 0       | 0       | 0       |
| 0       | 0       | 0        | 0       | 0       | 0       | 0       | 0       |
| 0       | 0       | 0        | 0       | 0       | 0       | 0       | 0       |
| 7.16707 | 4.79271 | 10.62389 | 0.47021 | 1.94643 | 0.04387 | 1.73347 | 7.12661 |
| 0       | 0.06936 | 0        | 0       | 0       | 0       | 0.08502 | 0.0175  |
| 0       | 0.06936 | 0        | 0       | 0       | 0       | 0.08502 | 0.0175  |
| 0.00256 | 0       | 0        | 0       | 0       | 0       | 0       | 0       |
| 0.00256 | 0       | 0        | 0       | 0       | 0       | 0       | 0       |
| 0.01237 | 0       | 0.17731  | 0       | 0       | 0       | 0       | 0       |
| 0.01237 | 0       | 0.17731  | 0       | 0       | 0       | 0       | 0       |
| 0.07477 | 0.67495 | 0.06769  | 0       | 0       | 0       | 0       | 0.00193 |
| 0.07477 | 0.67495 | 0.06769  | 0       | 0       | 0       | 0       | 0.00193 |
| 4.25782 | 0.01435 | 6.48812  | 0.0023  | 1.92974 | 0.00518 | 1.43192 | 6.70083 |
| 4.25782 | 0.01435 | 6.48812  | 0.0023  | 1.92974 | 0.00518 | 1.43192 | 6.70083 |
| 1.50408 | 2.82986 | 2.94702  | 0       | 0.00765 | 0.02615 | 0.19682 | 0.40139 |
| 1.50408 | 2.82986 | 2.94702  | 0       | 0.00765 | 0.02615 | 0.19682 | 0.40139 |

|         |         |         |         |         |         |         |         |
|---------|---------|---------|---------|---------|---------|---------|---------|
| 0       | 0       | 0       | 0       | 0       | 0       | 0       | 0       |
| 0       | 0       | 0       | 0       | 0       | 0       | 0       | 0       |
| 0       | 0       | 0       | 0       | 0       | 0       | 0       | 0       |
| 0.04201 | 0.00035 | 0.04236 | 0       | 0       | 0       | 0       | 0       |
| 0.04201 | 0.00035 | 0.04236 | 0       | 0       | 0       | 0       | 0       |
| 0       | 0       | 0       | 0       | 0       | 0       | 0       | 0       |
| 0       | 0       | 0       | 0       | 0       | 0       | 0       | 0       |
| 0       | 0       | 0       | 0       | 0       | 0       | 0       | 0       |
| 0.15448 | 0.02634 | 0.13786 | 0       | 0       | 0       | 0       | 0       |
| 0.00771 | 0.02634 | 0.13786 | 0       | 0       | 0       | 0       | 0       |
| 0.0045  | 0       | 0       | 0       | 0       | 0       | 0       | 0       |
| 0       | 0       | 0       | 0       | 0       | 0       | 0       | 0       |
| 0.14228 | 0       | 0       | 0       | 0       | 0       | 0       | 0       |
| 0       | 0       | 0       | 0       | 0       | 0       | 0       | 0       |
| 0.00202 | 0       | 0.00007 | 0       | 0       | 0       | 0       | 0       |
| 0       | 0       | 0       | 0       | 0       | 0       | 0       | 0       |
| 0.00202 | 0       | 0       | 0       | 0       | 0       | 0       | 0       |
| 0       | 0       | 0       | 0       | 0       | 0       | 0       | 0       |
| 0       | 0       | 0       | 0       | 0       | 0       | 0       | 0       |
| 0       | 0       | 0.00007 | 0       | 0       | 0       | 0       | 0       |
| 1.11696 | 1.1775  | 0.76346 | 0.46791 | 0.00903 | 0.01253 | 0.0197  | 0.00497 |
| 1.11696 | 1.1775  | 0.76346 | 0.46791 | 0.00903 | 0.01253 | 0.0197  | 0.00497 |
| 0.12576 | 0.33143 | 2.81461 | 0.78622 | 2.00349 | 0.10708 | 0.24417 | 0.20052 |
| 0.12576 | 0.33143 | 2.81461 | 0.78622 | 2.00349 | 0.10708 | 0.24417 | 0.20052 |
| 0.12576 | 0.33143 | 2.81461 | 0.78622 | 2.00349 | 0.10708 | 0.24417 | 0.20052 |
| 0       | 0.03932 | 0.0117  | 0       | 0       | 0       | 0       | 0       |
| 0       | 0.03932 | 0.0117  | 0       | 0       | 0       | 0       | 0       |
| 0       | 0       | 0       | 0       | 0       | 0       | 0       | 0       |
| 0       | 0       | 0       | 0       | 0       | 0       | 0       | 0       |
| 0.05115 | 0.00781 | 0.0103  | 0.11663 | 0       | 0       | 0       | 0       |
| 0.05115 | 0.00781 | 0.0103  | 0.11663 | 0       | 0       | 0       | 0       |
| 0       | 0.11101 | 0.04967 | 0       | 0.00669 | 0.00867 | 0       | 0       |
| 0       | 0.11101 | 0.04967 | 0       | 0.00669 | 0.00867 | 0       | 0       |
| 0.03253 | 0.04343 | 0.00934 | 0       | 0       | 0       | 0       | 0.00118 |
| 0.03253 | 0.04343 | 0.00934 | 0       | 0       | 0       | 0       | 0.00118 |

|         |         |         |         |         |         |         |         |
|---------|---------|---------|---------|---------|---------|---------|---------|
| 0       | 0       | 0       | 0       | 0       | 0       | 0       | 0       |
| 0       | 0       | 0       | 0       | 0       | 0       | 0       | 0       |
| 0.01969 | 0.12866 | 2.73331 | 0.6696  | 1.99446 | 0.09841 | 0.24417 | 0.19619 |
| 0       | 0.11049 | 0.19057 | 0.05682 | 1.95481 | 0.08893 | 0.0404  | 0.04341 |
| 0       | 0.00543 | 1.93628 | 0       | 0       | 0       | 0       | 0.00318 |
| 0.01969 | 0.01274 | 0.60646 | 0.61278 | 0.03966 | 0.00948 | 0.20377 | 0.14961 |
| 0       | 0       | 0       | 0       | 0       | 0       | 0       | 0       |
| 0       | 0       | 0       | 0       | 0       | 0       | 0       | 0       |
| 0       | 0       | 0       | 0       | 0       | 0       | 0       | 0       |
| 0       | 0       | 0       | 0       | 0       | 0       | 0       | 0       |
| 0       | 0       | 0       | 0       | 0       | 0       | 0       | 0       |
| 0       | 0       | 0       | 0       | 0       | 0       | 0       | 0       |
| 0       | 0       | 0       | 0       | 0       | 0       | 0       | 0       |
| 0       | 0       | 0       | 0       | 0       | 0       | 0       | 0       |
| 0.02239 | 0       | 0       | 0       | 0       | 0       | 0       | 0.00315 |
| 0.02239 | 0       | 0       | 0       | 0       | 0       | 0       | 0.00315 |
| 0       | 0       | 0       | 0       | 0       | 0       | 0       | 0       |
| 0       | 0       | 0       | 0       | 0       | 0       | 0       | 0       |
| 0       | 0.00121 | 0.00028 | 0       | 0.00233 | 0       | 0       | 0       |
| 0       | 0.00121 | 0.00028 | 0       | 0.00233 | 0       | 0       | 0       |
| 0       | 0       | 0       | 0       | 0       | 0       | 0       | 0       |
| 0       | 0       | 0       | 0       | 0       | 0       | 0       | 0       |
| 0.33607 | 0       | 0       | 0       | 0       | 0       | 0       | 0       |
| 0.33607 | 0       | 0       | 0       | 0       | 0       | 0       | 0       |
| 0.33607 | 0       | 0       | 0       | 0       | 0       | 0       | 0       |
| 0.33607 | 0       | 0       | 0       | 0       | 0       | 0       | 0       |
| 0       | 0       | 0       | 0       | 0       | 0       | 0       | 0       |
| 0       | 0       | 0       | 0       | 0       | 0       | 0       | 0       |
| 0       | 0       | 0       | 0       | 0       | 0       | 0       | 0       |
| 0       | 0       | 0       | 0       | 0       | 0       | 0       | 0       |
| 0       | 0       | 0       | 0       | 0       | 0       | 0       | 0       |
| 0       | 0       | 0       | 0       | 0       | 0       | 0       | 0       |
| 0.33607 | 0       | 0       | 0       | 0       | 0       | 0       | 0       |
| 0       | 0       | 0       | 0       | 0       | 0       | 0       | 0       |
| 0       | 0       | 0       | 0       | 0       | 0       | 0       | 0       |
| 1.39275 | 2.56202 | 3.55416 | 0.40693 | 0.81306 | 0.20232 | 1.93683 | 6.06488 |

|         |         |         |         |         |         |         |         |
|---------|---------|---------|---------|---------|---------|---------|---------|
| 0.65064 | 1.59253 | 0.7666  | 0.40693 | 0.81306 | 0.20232 | 0.8504  | 1.91238 |
| 0.65064 | 1.59253 | 0.7666  | 0.40693 | 0.81306 | 0.20232 | 0.8504  | 1.91238 |
| 0       | 0.11015 | 0       | 0       | 0       | 0       | 0       | 1.64218 |
| 0       | 0.11015 | 0       | 0       | 0       | 0       | 0       | 1.64218 |
| 0       | 0       | 0       | 0       | 0       | 0       | 0       | 0       |
| 0.65064 | 1.48238 | 0.7666  | 0.40693 | 0.81306 | 0.20232 | 0.8504  | 0.2702  |
| 0.65064 | 1.48238 | 0.7666  | 0.40693 | 0.81306 | 0.20232 | 0.8504  | 0.2702  |
| 0       | 0       | 0       | 0       | 0       | 0       | 0       | 0       |
| 0.72546 | 0.96343 | 2.78412 | 0       | 0       | 0       | 0       | 1.54791 |
| 0.72546 | 0.96343 | 2.78412 | 0       | 0       | 0       | 0       | 1.54791 |
| 0.72546 | 0.96343 | 2.78412 | 0       | 0       | 0       | 0       | 1.54791 |
| 0       | 0.62198 | 2.23976 | 0       | 0       | 0       | 0       | 1.03012 |
| 0.72546 | 0.34145 | 0.54435 | 0       | 0       | 0       | 0       | 0.51779 |
| 0       | 0       | 0       | 0       | 0       | 0       | 0       | 0       |
| 0       | 0       | 0       | 0       | 0       | 0       | 0       | 0       |
| 0       | 0       | 0       | 0       | 0       | 0       | 0       | 0       |
| 0       | 0       | 0       | 0       | 0       | 0       | 0       | 0       |
| 0       | 0       | 0       | 0       | 0       | 0       | 0       | 0       |
| 0       | 0       | 0       | 0       | 0       | 0       | 0       | 0       |
| 0       | 0       | 0       | 0       | 0       | 0       | 0       | 0       |
| 0.01665 | 0.00606 | 0.00344 | 0       | 0       | 0       | 1.08643 | 2.6046  |
| 0.01665 | 0.00606 | 0.00344 | 0       | 0       | 0       | 1.08643 | 2.6046  |
| 0       | 0       | 0       | 0       | 0       | 0       | 0       | 0       |
| 0       | 0       | 0       | 0       | 0       | 0       | 0       | 0       |
| 0       | 0       | 0       | 0       | 0       | 0       | 0       | 0       |
| 0       | 0       | 0       | 0       | 0       | 0       | 0       | 0       |
| 0       | 0       | 0       | 0       | 0       | 0       | 0       | 0.27114 |
| 0       | 0       | 0       | 0       | 0       | 0       | 0       | 0.00123 |
| 0       | 0       | 0       | 0       | 0       | 0       | 0       | 0.07355 |
| 0       | 0       | 0       | 0       | 0       | 0       | 0       | 0.19635 |
| 0.0115  | 0.00413 | 0.00139 | 0       | 0       | 0       | 0.00023 | 1.16072 |
| 0.0115  | 0       | 0       | 0       | 0       | 0       | 0       | 0.09323 |
| 0       | 0       | 0       | 0       | 0       | 0       | 0       | 0       |
| 0       | 0.00413 | 0.00139 | 0       | 0       | 0       | 0.00023 | 1.06749 |
| 0       | 0       | 0       | 0       | 0       | 0       | 0       | 0       |

|         |         |         |         |         |         |         |         |
|---------|---------|---------|---------|---------|---------|---------|---------|
| 0       | 0       | 0       | 0       | 0       | 0       | 0       | 0       |
| 0.00515 | 0.00193 | 0.00205 | 0       | 0       | 0       | 1.0862  | 1.17274 |
| 0.00515 | 0.00193 | 0       | 0       | 0       | 0       | 0.3315  | 0.76728 |
| 0       | 0       | 0.00205 | 0       | 0       | 0       | 0.36408 | 0.09677 |
| 0       | 0       | 0       | 0       | 0       | 0       | 0.08194 | 0.04772 |
| 0       | 0       | 0       | 0       | 0       | 0       | 0.16852 | 0.16297 |
| 0       | 0       | 0       | 0       | 0       | 0       | 0       | 0       |
| 0       | 0       | 0       | 0       | 0       | 0       | 0.00042 | 0.00109 |
| 0       | 0       | 0       | 0       | 0       | 0       | 0.13974 | 0.09574 |
| 0       | 0       | 0       | 0       | 0       | 0       | 0       | 0.00118 |
| 0       | 0.00997 | 0.00242 | 0       | 0.00998 | 0.00054 | 0       | 0       |
| 0       | 0.00997 | 0.00242 | 0       | 0.00998 | 0.00054 | 0       | 0       |
| 0       | 0.00997 | 0.00242 | 0       | 0.00998 | 0.00054 | 0       | 0       |
| 0       | 0.00114 | 0       | 0       | 0       | 0       | 0       | 0       |
| 0       | 0       | 0       | 0       | 0       | 0       | 0       | 0       |
| 0       | 0.00114 | 0       | 0       | 0       | 0       | 0       | 0       |
| 0       | 0       | 0       | 0       | 0       | 0       | 0       | 0       |
| 0       | 0       | 0       | 0       | 0       | 0       | 0       | 0       |
| 0       | 0       | 0.00242 | 0       | 0.00998 | 0.00054 | 0       | 0       |
| 0       | 0       | 0.00242 | 0       | 0.00677 | 0.00054 | 0       | 0       |
| 0       | 0       | 0       | 0       | 0.00321 | 0       | 0       | 0       |
| 0       | 0.00883 | 0       | 0       | 0       | 0       | 0       | 0       |
| 0       | 0       | 0       | 0       | 0       | 0       | 0       | 0       |
| 0       | 0.00883 | 0       | 0       | 0       | 0       | 0       | 0       |
| 0       | 0       | 0       | 0       | 0       | 0       | 0       | 0       |
| 0       | 3.6388  | 0.8075  | 2.76449 | 0       | 0.00054 | 0.42923 | 0.29835 |
| 0       | 3.6388  | 0.8075  | 2.76449 | 0       | 0.00054 | 0.42923 | 0.29835 |
| 0       | 3.6388  | 0.8075  | 2.76449 | 0       | 0.00054 | 0.42923 | 0.29835 |
| 0       | 3.6388  | 0.8075  | 2.76449 | 0       | 0.00054 | 0.42923 | 0.28777 |
| 0       | 0       | 0       | 0       | 0       | 0       | 0       | 0       |
| 0       | 0       | 0       | 0       | 0       | 0       | 0       | 0       |
| 0       | 3.6388  | 0.8075  | 2.76449 | 0       | 0.00054 | 0.42923 | 0.28777 |
| 0       | 0       | 0       | 0       | 0       | 0       | 0       | 0       |
| 0       | 3.6388  | 0.8075  | 2.76449 | 0       | 0       | 0       | 0       |
| 0       | 0       | 0       | 0       | 0       | 0       | 0       | 0       |

|         |         |         |         |          |          |          |         |
|---------|---------|---------|---------|----------|----------|----------|---------|
| 0       | 0       | 0       | 0       | 0        | 0        | 0        | 0       |
| 0       | 0       | 0       | 0       | 0        | 0        | 0        | 0.02196 |
| 0       | 0       | 0       | 0       | 0        | 0        | 0        | 0       |
| 0       | 0       | 0       | 0       | 0        | 0        | 0        | 0       |
| 0       | 0       | 0       | 0       | 0        | 0.00054  | 0.42923  | 0.2658  |
| 0       | 0       | 0       | 0       | 0        | 0        | 0        | 0.01058 |
| 0       | 0       | 0       | 0       | 0        | 0        | 0        | 0.01058 |
| 0       | 0       | 0       | 0       | 0        | 0        | 0        | 0       |
| 0       | 0       | 0       | 0       | 0        | 0        | 0        | 0       |
| 0       | 0       | 0       | 0       | 0        | 0        | 0        | 0.01058 |
| 0       | 0       | 0       | 0       | 0        | 0        | 0        | 0       |
| 0       | 0       | 0       | 0       | 0        | 0        | 0        | 0       |
| 0       | 0       | 0       | 0       | 0        | 0        | 0        | 0       |
| 0       | 0       | 0       | 0       | 0        | 0        | 0        | 0       |
| 0       | 0       | 0       | 0       | 0        | 0        | 0        | 0       |
| 0       | 0       | 0       | 0       | 0        | 0        | 0        | 0       |
| 0       | 0       | 0       | 0       | 0        | 0        | 0        | 0       |
| 0       | 0       | 0       | 0       | 0        | 0        | 0        | 0       |
| 0       | 0       | 0       | 0       | 0        | 0        | 0        | 0       |
| 0.33435 | 1.22598 | 1.22998 | 4.19064 | 18.74522 | 14.14043 | 16.79888 | 1.03374 |
| 0.04634 | 0       | 0.15515 | 0       | 0        | 0        | 0.02632  | 0.0427  |
| 0.04634 | 0       | 0.15251 | 0       | 0        | 0        | 0.02632  | 0.0148  |
| 0       | 0       | 0       | 0       | 0        | 0        | 0        | 0       |
| 0       | 0       | 0       | 0       | 0        | 0        | 0        | 0       |
| 0       | 0       | 0       | 0       | 0        | 0        | 0        | 0       |
| 0       | 0       | 0       | 0       | 0        | 0        | 0        | 0       |
| 0       | 0       | 0       | 0       | 0        | 0        | 0        | 0       |
| 0       | 0       | 0       | 0       | 0        | 0        | 0        | 0       |
| 0.04634 | 0       | 0.15251 | 0       | 0        | 0        | 0        | 0       |
| 0.04634 | 0       | 0.15251 | 0       | 0        | 0        | 0        | 0       |
| 0.04634 | 0       | 0.15251 | 0       | 0        | 0        | 0        | 0       |
| 0       | 0       | 0       | 0       | 0        | 0        | 0.02632  | 0.0148  |
| 0       | 0       | 0       | 0       | 0        | 0        | 0        | 0       |
| 0       | 0       | 0       | 0       | 0        | 0        | 0        | 0       |
| 0       | 0       | 0       | 0       | 0        | 0        | 0.02632  | 0.0148  |
| 0       | 0       | 0       | 0       | 0        | 0        | 0.02632  | 0.0148  |

|         |         |         |         |          |          |          |         |
|---------|---------|---------|---------|----------|----------|----------|---------|
| 0       | 0       | 0       | 0       | 0        | 0        | 0        | 0       |
| 0       | 0       | 0       | 0       | 0        | 0        | 0        | 0       |
| 0       | 0       | 0.00264 | 0       | 0        | 0        | 0        | 0.02789 |
| 0       | 0       | 0.00264 | 0       | 0        | 0        | 0        | 0.02789 |
| 0       | 0       | 0       | 0       | 0        | 0        | 0        | 0.00929 |
| 0       | 0       | 0       | 0       | 0        | 0        | 0        | 0.00929 |
| 0       | 0       | 0.00264 | 0       | 0        | 0        | 0        | 0.0186  |
| 0       | 0       | 0       | 0       | 0        | 0        | 0        | 0       |
| 0       | 0       | 0.00264 | 0       | 0        | 0        | 0        | 0.01481 |
| 0       | 0       | 0       | 0       | 0        | 0        | 0        | 0       |
| 0       | 0       | 0       | 0       | 0        | 0        | 0        | 0       |
| 0       | 0       | 0       | 0       | 0        | 0        | 0        | 0.00379 |
| 0.08213 | 0.92616 | 0.88555 | 0       | 0.02655  | 0.0008   | 0.00629  | 0.02512 |
| 0.08213 | 0.92616 | 0.88555 | 0       | 0.02655  | 0.0008   | 0.00629  | 0.02512 |
| 0.08213 | 0.92616 | 0.88555 | 0       | 0.02655  | 0.0008   | 0.00629  | 0.02512 |
| 0.08213 | 0.16239 | 0.06978 | 0       | 0.02655  | 0.0008   | 0.00629  | 0.02512 |
| 0.08213 | 0.16239 | 0.06978 | 0       | 0.02655  | 0.0008   | 0.00629  | 0.02512 |
| 0       | 0.76377 | 0.81577 | 0       | 0        | 0        | 0        | 0       |
| 0       | 0       | 0       | 0       | 0        | 0        | 0        | 0       |
| 0       | 0.76377 | 0.81577 | 0       | 0        | 0        | 0        | 0       |
| 0       | 0       | 0       | 0       | 0        | 0        | 0.00169  | 0.05252 |
| 0       | 0       | 0       | 0       | 0        | 0        | 0.00169  | 0.05252 |
| 0       | 0       | 0       | 0       | 0        | 0        | 0.00169  | 0.05252 |
| 0       | 0       | 0       | 0       | 0        | 0        | 0.00169  | 0.05252 |
| 0       | 0       | 0       | 0       | 0        | 0        | 0.00169  | 0.0524  |
| 0       | 0       | 0       | 0       | 0        | 0        | 0        | 0       |
| 0       | 0       | 0       | 0       | 0        | 0        | 0        | 0       |
| 0       | 0       | 0       | 0       | 0        | 0        | 0        | 0.00012 |
| 0       | 0       | 0       | 0       | 0        | 0        | 0        | 0       |
| 0       | 0       | 0       | 0       | 0        | 0        | 0        | 0       |
| 0       | 0       | 0       | 0       | 0        | 0        | 0        | 0       |
| 0       | 0       | 0       | 0       | 0        | 0        | 0        | 0       |
| 0       | 0       | 0       | 0       | 0        | 0        | 0        | 0       |
| 0       | 0       | 0       | 0       | 0        | 0        | 0        | 0       |
| 0.20588 | 0.29983 | 0.18928 | 4.19064 | 18.71866 | 14.13964 | 16.76458 | 0.91341 |
| 0       | 0       | 0       | 0       | 0        | 0        | 0        | 0       |

|         |         |         |         |          |          |         |        |
|---------|---------|---------|---------|----------|----------|---------|--------|
| 0       | 0       | 0       | 0       | 0        | 0        | 0       | 0      |
| 0       | 0       | 0       | 0       | 0        | 0        | 0       | 0      |
| 0       | 0       | 0       | 0       | 0        | 0        | 0       | 0      |
| 0       | 0       | 0       | 0       | 0        | 0        | 0       | 0      |
| 0       | 0       | 0       | 0       | 0        | 0        | 0       | 0      |
| 0       | 0       | 0       | 0       | 0        | 0        | 0       | 0      |
| 0       | 0       | 0       | 0       | 0        | 0        | 0       | 0      |
| 0       | 0       | 0       | 0       | 0        | 0        | 0       | 0      |
| 0       | 0       | 0       | 0       | 0        | 0        | 0       | 0      |
| 0       | 0       | 0       | 0       | 0        | 0        | 0       | 0      |
| 0       | 0       | 0       | 0       | 0        | 0        | 0       | 0      |
| 0       | 0       | 0       | 0       | 0        | 0        | 0       | 0      |
| 0       | 0       | 0       | 0       | 0        | 0        | 0       | 0      |
| 0.20588 | 0.29983 | 0.18928 | 4.19064 | 18.71866 | 14.13964 | 16.4268 | 0.6182 |
| 0       | 0       | 0       | 0       | 0        | 0        | 0       | 0      |
| 0       | 0       | 0       | 0       | 0        | 0        | 0       | 0      |
| 0       | 0       | 0       | 0       | 0        | 0        | 0       | 0      |
| 0.20588 | 0.29983 | 0.18928 | 4.19064 | 18.71866 | 14.13964 | 16.4268 | 0.6182 |
| 0       | 0       | 0       | 0       | 0        | 0        | 0.33385 | 0      |
| 0       | 0       | 0       | 0       | 0        | 0        | 0       | 0      |
| 0       | 0       | 0       | 0       | 0        | 0        | 0       | 0      |
| 0       | 0       | 0       | 0       | 0        | 0        | 0.00425 | 0      |
| 0       | 0       | 0       | 0       | 0        | 0        | 0       | 0      |
| 0       | 0       | 0       | 0       | 0        | 0        | 0       | 0      |
| 0       | 0       | 0       | 0       | 0        | 0        | 0       | 0      |
| 0       | 0       | 0       | 0       | 0        | 0        | 0.18944 | 0      |
| 0       | 0       | 0       | 0       | 0        | 0        | 0       | 0      |
| 0       | 0       | 0       | 0       | 0        | 0        | 0       | 0      |
| 0       | 0       | 0       | 0       | 0        | 0        | 0.11964 | 0      |
| 0       | 0       | 0       | 0       | 0        | 0        | 0.02053 | 0      |
| 0       | 0       | 0       | 0       | 0        | 0        | 0       | 0      |
| 0       | 0       | 0       | 0       | 0        | 0        | 0       | 0      |
| 0       | 0       | 0       | 0       | 0        | 0        | 0.2704  | 0      |
| 0       | 0       | 0       | 0       | 0        | 0        | 0.26885 | 0      |
| 0       | 0       | 0       | 0       | 0        | 0        | 0       | 0      |









| AP017_2 | AP017_3  | AP018_1  | AP018_2  | AP018_3  | AP019_1  | AP019_2 | AP019_3  |
|---------|----------|----------|----------|----------|----------|---------|----------|
| 100     | 100      | 97.67721 | 98.08602 | 98.76995 | 99.99948 | 100     | 99.99937 |
| 1.77453 | 55.03769 | 0.18097  | 0.03838  | 0.30557  | 0.44863  | 0.06626 | 0.41664  |
| 1.27365 | 54.5062  | 0.01084  | 0.02089  | 0.01345  | 0.02127  | 0.01232 | 0.01823  |
| 0.0003  | 0.00183  | 0.002    | 0.01436  | 0.00463  | 0.02041  | 0.00782 | 0.01765  |
| 0.0003  | 0.00183  | 0.002    | 0.01436  | 0.00463  | 0.02041  | 0.00782 | 0.01765  |
| 0       | 0        | 0        | 0        | 0        | 0        | 0       | 0        |
| 0       | 0        | 0        | 0        | 0        | 0        | 0       | 0        |
| 0.0003  | 0.00183  | 0.002    | 0.01436  | 0.00463  | 0.02041  | 0.00782 | 0.01765  |
| 0       | 0        | 0        | 0        | 0        | 0        | 0       | 0        |
| 0       | 0.00096  | 0        | 0        | 0        | 0.00696  | 0       | 0.00447  |
| 0       | 0        | 0        | 0        | 0        | 0        | 0       | 0        |
| 0       | 0        | 0        | 0        | 0        | 0        | 0       | 0        |
| 0       | 0        | 0        | 0        | 0        | 0        | 0       | 0        |
| 0       | 0.00042  | 0.00149  | 0.00344  | 0.00087  | 0.00292  | 0.00035 | 0.00227  |
| 0       | 0        | 0        | 0        | 0        | 0        | 0       | 0        |
| 0.0003  | 0.00044  | 0        | 0        | 0        | 0.0029   | 0       | 0.00231  |
| 0       | 0        | 0        | 0        | 0        | 0.00063  | 0       | 0.00026  |
| 0       | 0        | 0.00044  | 0.00106  | 0.00087  | 0.00534  | 0       | 0.00615  |
| 0       | 0        | 0        | 0.00152  | 0.00036  | 0.00017  | 0.00553 | 0.00111  |
| 0       | 0        | 0        | 0        | 0        | 0        | 0       | 0        |
| 0       | 0        | 0.00006  | 0.00835  | 0.00057  | 0.0015   | 0.00195 | 0.00106  |
| 0       | 0        | 0        | 0        | 0        | 0        | 0       | 0        |
| 0       | 0        | 0        | 0        | 0.00196  | 0        | 0       | 0        |
| 0       | 0        | 0        | 0        | 0        | 0        | 0       | 0        |
| 0       | 0        | 0        | 0        | 0        | 0        | 0       | 0        |
| 1.27335 | 54.48584 | 0        | 0.00405  | 0        | 0.00031  | 0.00212 | 0.00028  |
| 1.27335 | 54.48584 | 0        | 0.00405  | 0        | 0.00031  | 0.00212 | 0.00028  |
| 0       | 0.00048  | 0        | 0        | 0        | 0        | 0       | 0        |
| 0       | 0.00048  | 0        | 0        | 0        | 0        | 0       | 0        |
| 0       | 0        | 0        | 0        | 0        | 0        | 0.00212 | 0        |
| 0       | 0        | 0        | 0        | 0        | 0        | 0.00212 | 0        |
| 1.26497 | 54.21615 | 0        | 0.00405  | 0        | 0.00031  | 0       | 0.00028  |

|         |          |         |         |         |         |         |         |
|---------|----------|---------|---------|---------|---------|---------|---------|
| 0.86818 | 24.92678 | 0       | 0       | 0       | 0       | 0       | 0       |
| 0       | 0        | 0       | 0       | 0       | 0       | 0       | 0       |
| 0.12818 | 0.29853  | 0       | 0       | 0       | 0       | 0       | 0       |
| 0.00639 | 2.77231  | 0       | 0       | 0       | 0       | 0       | 0       |
| 0       | 0        | 0       | 0.00357 | 0       | 0.00031 | 0       | 0.00028 |
| 0.1678  | 16.28041 | 0       | 0.00048 | 0       | 0       | 0       | 0       |
| 0.09442 | 9.93812  | 0       | 0       | 0       | 0       | 0       | 0       |
| 0.00839 | 0.26921  | 0       | 0       | 0       | 0       | 0       | 0       |
| 0.00839 | 0.26921  | 0       | 0       | 0       | 0       | 0       | 0       |
| 0       | 0        | 0       | 0       | 0       | 0       | 0       | 0       |
| 0       | 0        | 0       | 0       | 0       | 0       | 0       | 0       |
| 0       | 0        | 0       | 0       | 0       | 0       | 0       | 0       |
| 0       | 0        | 0       | 0       | 0       | 0       | 0       | 0       |
| 0       | 0        | 0       | 0       | 0       | 0       | 0       | 0       |
| 0       | 0        | 0       | 0       | 0       | 0       | 0       | 0       |
| 0       | 0        | 0       | 0       | 0       | 0       | 0       | 0       |
| 0       | 0        | 0       | 0       | 0       | 0       | 0       | 0       |
| 0       | 0        | 0       | 0       | 0       | 0       | 0       | 0       |
| 0       | 0.01854  | 0.00884 | 0.00248 | 0.00882 | 0.00054 | 0.00238 | 0.00031 |
| 0       | 0.01854  | 0.00884 | 0.00248 | 0.00882 | 0.00054 | 0.00238 | 0.00031 |
| 0       | 0.01854  | 0.00884 | 0.00248 | 0.00882 | 0.00054 | 0.00238 | 0.00031 |
| 0       | 0        | 0       | 0       | 0       | 0       | 0       | 0       |
| 0       | 0        | 0       | 0       | 0       | 0       | 0       | 0       |
| 0       | 0.01854  | 0.00884 | 0.00248 | 0.00882 | 0.00054 | 0.00238 | 0.00031 |
| 0       | 0        | 0       | 0       | 0       | 0       | 0       | 0       |
| 0       | 0        | 0       | 0       | 0       | 0       | 0       | 0       |
| 0       | 0        | 0       | 0       | 0       | 0       | 0       | 0       |
| 0       | 0        | 0       | 0       | 0       | 0       | 0       | 0       |
| 0       | 0        | 0       | 0       | 0       | 0       | 0       | 0       |
| 0       | 0        | 0       | 0       | 0       | 0       | 0       | 0       |
| 0.50088 | 0.53149  | 0.17013 | 0.01749 | 0.29212 | 0.42736 | 0.05394 | 0.39841 |
| 0.10476 | 0.52379  | 0       | 0       | 0       | 0.35894 | 0.01208 | 0.33642 |
| 0.00213 | 0        | 0       | 0       | 0       | 0       | 0.01208 | 0.00012 |
| 0.00213 | 0        | 0       | 0       | 0       | 0       | 0.01208 | 0.00012 |
| 0       | 0        | 0       | 0       | 0       | 0       | 0       | 0       |
| 0.00213 | 0        | 0       | 0       | 0       | 0       | 0.00835 | 0.00012 |

|          |          |          |          |          |          |          |          |
|----------|----------|----------|----------|----------|----------|----------|----------|
| 0        | 0        | 0        | 0        | 0        | 0        | 0.00373  | 0        |
| 0        | 0        | 0        | 0        | 0        | 0        | 0        | 0        |
| 0        | 0        | 0        | 0        | 0        | 0        | 0        | 0        |
| 0        | 0        | 0        | 0        | 0        | 0        | 0        | 0        |
| 0.10263  | 0.52379  | 0        | 0        | 0        | 0.35894  | 0        | 0.3363   |
| 0.10263  | 0.52369  | 0        | 0        | 0        | 0.35855  | 0        | 0.33581  |
| 0.10163  | 0.52141  | 0        | 0        | 0        | 0.28038  | 0        | 0.27388  |
| 0.0008   | 0.00069  | 0        | 0        | 0        | 0.02194  | 0        | 0.01709  |
| 0.0002   | 0.00159  | 0        | 0        | 0        | 0.05623  | 0        | 0.04484  |
| 0        | 0.0001   | 0        | 0        | 0        | 0.00039  | 0        | 0.00049  |
| 0        | 0.0001   | 0        | 0        | 0        | 0.00039  | 0        | 0.00049  |
| 0        | 0        | 0        | 0        | 0        | 0        | 0        | 0        |
| 0.39612  | 0.0077   | 0.17013  | 0.01749  | 0.29212  | 0.06842  | 0.04186  | 0.06199  |
| 0.39612  | 0.0077   | 0.17013  | 0.01749  | 0.29212  | 0.06842  | 0.04186  | 0.06199  |
| 0        | 0        | 0.09175  | 0.00495  | 0.15493  | 0        | 0        | 0        |
| 0        | 0        | 0.09175  | 0.00495  | 0.15493  | 0        | 0        | 0        |
| 0        | 0        | 0.02379  | 0.00133  | 0.03761  | 0        | 0        | 0        |
| 0        | 0        | 0.02379  | 0.00133  | 0.03761  | 0        | 0        | 0        |
| 0.36853  | 0.0074   | 0.02883  | 0.00215  | 0.05184  | 0.06095  | 0.03899  | 0.05505  |
| 0.36853  | 0.0074   | 0.02883  | 0.00215  | 0.05184  | 0.06095  | 0.03899  | 0.05505  |
| 0        | 0        | 0.00043  | 0        | 0.00086  | 0        | 0        | 0        |
| 0        | 0        | 0.00043  | 0        | 0.00086  | 0        | 0        | 0        |
| 0.02759  | 0.0003   | 0.02533  | 0.00906  | 0.04689  | 0.00747  | 0.00288  | 0.00694  |
| 0.02759  | 0.0003   | 0.02533  | 0.00906  | 0.04689  | 0.00747  | 0.00288  | 0.00694  |
| 0        | 0        | 0        | 0        | 0        | 0        | 0        | 0        |
| 0        | 0        | 0        | 0        | 0        | 0        | 0        | 0        |
| 67.01439 | 28.54564 | 52.29163 | 56.93752 | 51.65554 | 62.42236 | 72.33596 | 57.70653 |
| 0        | 0        | 0        | 0        | 0        | 0        | 0        | 0        |
| 0        | 0        | 0        | 0        | 0        | 0        | 0        | 0        |
| 0        | 0        | 0        | 0        | 0        | 0        | 0        | 0        |
| 0        | 0        | 0        | 0        | 0        | 0        | 0        | 0        |
| 0        | 0        | 0        | 0        | 0        | 0        | 0        | 0        |
| 67.01439 | 28.54564 | 52.29163 | 56.93752 | 51.65554 | 62.42236 | 72.33596 | 57.70653 |
| 67.01439 | 28.54564 | 52.29163 | 56.93752 | 51.65554 | 62.42236 | 72.33596 | 57.70653 |
| 58.92929 | 25.56556 | 32.66067 | 50.25171 | 31.92384 | 45.32109 | 43.77595 | 43.05896 |



|         |         |          |         |          |         |         |         |
|---------|---------|----------|---------|----------|---------|---------|---------|
| 0       | 0       | 0.3452   | 2.81071 | 0.27338  | 0.10256 | 0       | 0.069   |
| 0       | 0       | 0.00106  | 0       | 0.03208  | 0       | 0.0014  | 0       |
| 0       | 0       | 0        | 0       | 0.02841  | 0       | 0.0014  | 0       |
| 0       | 0       | 0        | 0       | 0        | 0       | 0       | 0       |
| 0       | 0       | 0        | 0       | 0        | 0       | 0.0014  | 0       |
| 0       | 0       | 0        | 0       | 0.02841  | 0       | 0       | 0       |
| 0       | 0       | 0.00106  | 0       | 0.00367  | 0       | 0       | 0       |
| 0       | 0       | 0.00106  | 0       | 0.00367  | 0       | 0       | 0       |
| 0.00082 | 0.38263 | 0.03628  | 0.01848 | 0.13411  | 0.01284 | 0.00057 | 0.00021 |
| 0       | 0       | 0        | 0       | 0        | 0       | 0       | 0       |
| 0       | 0       | 0        | 0       | 0        | 0       | 0       | 0       |
| 0       | 0       | 0        | 0       | 0        | 0       | 0       | 0       |
| 0       | 0       | 0        | 0       | 0        | 0       | 0       | 0       |
| 0       | 0       | 0        | 0       | 0        | 0       | 0       | 0       |
| 0.00082 | 0.38263 | 0.03628  | 0.01848 | 0.13411  | 0.01284 | 0.00057 | 0.00021 |
| 0       | 0.36928 | 0.00409  | 0.00572 | 0.0053   | 0.01248 | 0       | 0.00009 |
| 0       | 0       | 0        | 0       | 0        | 0       | 0       | 0       |
| 0       | 0       | 0.00018  | 0       | 0.03731  | 0       | 0       | 0       |
| 0       | 0       | 0.01666  | 0       | 0.04658  | 0       | 0       | 0       |
| 0       | 0       | 0        | 0       | 0        | 0       | 0       | 0.00011 |
| 0       | 0       | 0        | 0       | 0        | 0       | 0       | 0       |
| 0       | 0.01029 | 0.01213  | 0.01276 | 0.03442  | 0       | 0       | 0       |
| 0       | 0       | 0        | 0       | 0        | 0       | 0       | 0       |
| 0       | 0       | 0        | 0       | 0        | 0       | 0       | 0       |
| 0       | 0       | 0        | 0       | 0        | 0       | 0       | 0       |
| 0       | 0       | 0        | 0       | 0        | 0       | 0       | 0       |
| 0       | 0       | 0        | 0       | 0        | 0       | 0       | 0       |
| 0       | 0       | 0        | 0       | 0        | 0       | 0       | 0       |
| 0       | 0       | 0        | 0       | 0        | 0       | 0       | 0       |
| 0       | 0       | 0        | 0       | 0        | 0       | 0       | 0       |
| 0       | 0       | 0        | 0       | 0.00061  | 0.00037 | 0.00057 | 0       |
| 0       | 0       | 0.00323  | 0       | 0.00989  | 0       | 0       | 0       |
| 0.00082 | 0.00306 | 0        | 0       | 0        | 0       | 0       | 0       |
| 4.61734 | 0.00261 | 14.27018 | 0.12822 | 14.29291 | 5.5609  | 0.70565 | 4.52493 |
| 4.61734 | 0.00261 | 14.27018 | 0.12822 | 14.29291 | 5.5609  | 0.70565 | 4.52493 |



|          |          |          |          |          |          |          |         |
|----------|----------|----------|----------|----------|----------|----------|---------|
| 0.03442  | 0        | 1.08679  | 0.01305  | 1.43     | 0        | 0        | 0       |
| 0.10654  | 0        | 0.04182  | 0        | 0.04594  | 0.01941  | 0.01159  | 0.01405 |
| 0.06431  | 0        | 0        | 0        | 0        | 0        | 0        | 0       |
| 4.07106  | 0.00261  | 12.54576 | 0.11431  | 12.33241 | 5.33067  | 0.04979  | 4.39951 |
| 0.341    | 0        | 0.59581  | 0.00086  | 0.48455  | 0.21083  | 0.64427  | 0.11136 |
| 0        | 0        | 0        | 0        | 0        | 0        | 0        | 0       |
| 2.89506  | 2.59483  | 2.26957  | 0.13448  | 2.00613  | 10.85427 | 27.84062 | 9.66215 |
| 2.89506  | 2.59483  | 2.26957  | 0.13448  | 2.00613  | 10.85427 | 27.84062 | 9.66215 |
| 1.60739  | 2.58661  | 0.43427  | 0.03561  | 0.42275  | 5.46757  | 13.16739 | 4.31745 |
| 1.28767  | 0.00822  | 0.09105  | 0        | 0.08107  | 2.2875   | 5.07703  | 3.51593 |
| 0        | 0        | 0        | 0        | 0        | 0.07321  | 4.96592  | 0.07068 |
| 0        | 0        | 0        | 0        | 0        | 0        | 0        | 0       |
| 0        | 0        | 1.74425  | 0.09887  | 1.50232  | 3.02599  | 4.63028  | 1.75808 |
| 0        | 0        | 0        | 0        | 0        | 0        | 0        | 0       |
| 0        | 0        | 0        | 0        | 0        | 0        | 0        | 0       |
| 0        | 0        | 0        | 0        | 0        | 0        | 0        | 0       |
| 0        | 0        | 0        | 0        | 0        | 0        | 0        | 0       |
| 0        | 0        | 0        | 0        | 0        | 0        | 0        | 0       |
| 0        | 0        | 0        | 0        | 0        | 0        | 0        | 0       |
| 0        | 0        | 0        | 0        | 0        | 0        | 0        | 0       |
| 29.39724 | 15.19266 | 35.64737 | 27.48343 | 38.73686 | 21.6998  | 17.90761 | 24.8831 |
| 0.14876  | 3.1723   | 0.17498  | 1.03061  | 0.18063  | 0.16414  | 1.16481  | 0.13736 |
| 0        | 0.02491  | 0        | 0.10655  | 0.00134  | 0        | 0.00239  | 0       |
| 0        | 0.02491  | 0        | 0.10655  | 0.00134  | 0        | 0.00239  | 0       |
| 0        | 0.02491  | 0        | 0.10655  | 0.00134  | 0        | 0.00239  | 0       |
| 0        | 0        | 0        | 0        | 0.00013  | 0        | 0        | 0       |
| 0        | 0.00535  | 0        | 0.10513  | 0        | 0        | 0        | 0       |
| 0        | 0.00033  | 0        | 0        | 0        | 0        | 0        | 0       |
| 0        | 0.01922  | 0        | 0.00143  | 0.00121  | 0        | 0.00239  | 0       |
| 0.14876  | 3.14739  | 0.17498  | 0.92406  | 0.17929  | 0.16414  | 1.16242  | 0.13736 |
| 0        | 0        | 0        | 0        | 0        | 0        | 0.00614  | 0       |
| 0        | 0        | 0        | 0        | 0        | 0        | 0.00614  | 0       |
| 0        | 0        | 0        | 0        | 0        | 0        | 0.00301  | 0       |
| 0        | 0        | 0        | 0        | 0        | 0        | 0.00314  | 0       |
| 0.00067  | 0.00032  | 0        | 0        | 0        | 0        | 0.00019  | 0       |



|          |         |          |          |          |          |          |          |
|----------|---------|----------|----------|----------|----------|----------|----------|
| 0.14547  | 3.14707 | 0.16609  | 0.92406  | 0.16181  | 0.14826  | 0.02208  | 0.12423  |
| 0.055    | 0.00095 | 0        | 0        | 0        | 0        | 0        | 0        |
| 0        | 0.00413 | 0        | 0        | 0        | 0        | 0        | 0        |
| 0        | 0.00157 | 0        | 0        | 0        | 0        | 0        | 0        |
| 0        | 0       | 0        | 0        | 0        | 0        | 0        | 0        |
| 0        | 0.0008  | 0.0019   | 0        | 0.00244  | 0        | 0        | 0        |
| 0.03016  | 0.00707 | 0.00347  | 0.18425  | 0.00076  | 0.00377  | 0.02142  | 0.00112  |
| 0        | 0       | 0        | 0        | 0        | 0        | 0        | 0        |
| 0        | 0       | 0        | 0        | 0        | 0        | 0        | 0        |
| 0.00298  | 0.05488 | 0        | 0.20277  | 0        | 0.00217  | 0        | 0.00092  |
| 0        | 0       | 0        | 0        | 0        | 0        | 0        | 0        |
| 0.00968  | 0.00484 | 0.01395  | 0        | 0.00987  | 0.00143  | 0        | 0        |
| 0.00665  | 0.09039 | 0.04748  | 0.48869  | 0.05125  | 0.0047   | 0.00066  | 0.00182  |
| 0.0129   | 0       | 0        | 0        | 0        | 0.12702  | 0        | 0.11395  |
| 0        | 0.00275 | 0        | 0        | 0        | 0        | 0        | 0        |
| 0.02811  | 2.95711 | 0.0993   | 0.04683  | 0.09587  | 0.00917  | 0        | 0.00642  |
| 0        | 0.00393 | 0        | 0        | 0.00163  | 0        | 0        | 0        |
| 0        | 0       | 0        | 0        | 0        | 0        | 0        | 0        |
| 0        | 0.00208 | 0        | 0        | 0        | 0        | 0        | 0        |
| 0        | 0.00135 | 0        | 0        | 0        | 0        | 0        | 0        |
| 0        | 0       | 0        | 0        | 0        | 0        | 0        | 0        |
| 0        | 0       | 0        | 0        | 0        | 0        | 0        | 0        |
| 0        | 0       | 0        | 0        | 0        | 0        | 0        | 0        |
| 0        | 0       | 0        | 0        | 0        | 0        | 0        | 0        |
| 0        | 0       | 0        | 0        | 0        | 0        | 0        | 0        |
| 0        | 0       | 0        | 0        | 0        | 0        | 0        | 0        |
| 0        | 0.00953 | 0        | 0        | 0        | 0        | 0        | 0        |
| 0        | 0.0057  | 0        | 0.00152  | 0        | 0        | 0        | 0        |
| 0        | 0       | 0        | 0        | 0        | 0        | 0        | 0        |
| 25.85126 | 6.68775 | 33.89403 | 25.78302 | 36.76646 | 18.37657 | 15.03385 | 21.89953 |
| 25.85126 | 6.68775 | 33.89403 | 25.78302 | 36.76646 | 18.37657 | 15.03385 | 21.89953 |
| 0.01758  | 0       | 0.00622  | 0        | 0.00974  | 0.00208  | 0.00011  | 0.00306  |
| 0.01758  | 0       | 0.00622  | 0        | 0.00974  | 0.00208  | 0.00011  | 0.00306  |
| 0.01758  | 0       | 0.00622  | 0        | 0.00974  | 0.00208  | 0.00011  | 0.00306  |
| 0.00312  | 0       | 0.00238  | 0        | 0.00453  | 0        | 0        | 0        |

|         |         |         |         |         |         |         |         |
|---------|---------|---------|---------|---------|---------|---------|---------|
| 0.00312 | 0       | 0.00238 | 0       | 0.00453 | 0       | 0       | 0       |
| 0.00312 | 0       | 0.00238 | 0       | 0.00453 | 0       | 0       | 0       |
| 0.12179 | 0.59859 | 0.67784 | 3.80357 | 0.9465  | 1.21871 | 4.07996 | 2.39759 |
| 0       | 0       | 0       | 0       | 0       | 0       | 0       | 0       |
| 0       | 0       | 0       | 0       | 0       | 0       | 0       | 0       |
| 0.02678 | 0.32589 | 0.66953 | 3.77738 | 0.93614 | 0.14677 | 2.01199 | 0.09047 |
| 0.00176 | 0       | 0       | 0       | 0       | 0       | 0       | 0       |
| 0.02502 | 0.32198 | 0       | 0.02155 | 0.00057 | 0.13004 | 2.01199 | 0.08553 |
| 0       | 0       | 0       | 0       | 0       | 0       | 0       | 0       |
| 0       | 0       | 0       | 0       | 0       | 0.01107 | 0       | 0.00022 |
| 0       | 0       | 0       | 0       | 0       | 0.00566 | 0       | 0.00471 |
| 0       | 0       | 0       | 0       | 0       | 0       | 0       | 0       |
| 0       | 0       | 0       | 0       | 0       | 0       | 0       | 0       |
| 0       | 0.00391 | 0       | 0       | 0       | 0       | 0       | 0       |
| 0       | 0       | 0       | 0       | 0       | 0       | 0       | 0       |
| 0       | 0       | 0.64372 | 3.73902 | 0.87184 | 0       | 0       | 0       |
| 0       | 0       | 0       | 0       | 0       | 0       | 0       | 0       |
| 0       | 0       | 0       | 0       | 0       | 0       | 0       | 0       |
| 0       | 0       | 0.0258  | 0.01682 | 0.06373 | 0       | 0       | 0       |
| 0       | 0       | 0       | 0       | 0       | 0       | 0       | 0       |
| 0       | 0       | 0       | 0       | 0       | 0       | 0       | 0       |
| 0.09501 | 0.2727  | 0.00831 | 0.02619 | 0.01036 | 1.06    | 2.06798 | 2.29033 |
| 0       | 0       | 0       | 0       | 0       | 0       | 0       | 0       |
| 0.09501 | 0.2727  | 0.00831 | 0.02619 | 0.01036 | 1.06    | 2.06798 | 2.29033 |
| 0       | 0       | 0       | 0       | 0       | 0.01194 | 0       | 0.01679 |
| 0       | 0       | 0       | 0       | 0       | 0.01194 | 0       | 0.01679 |
| 0       | 0.00073 | 0       | 0.00085 | 0       | 0.00007 | 0       | 0       |
| 0       | 0.00073 | 0       | 0.00085 | 0       | 0       | 0       | 0       |
| 0       | 0       | 0       | 0       | 0       | 0       | 0       | 0       |
| 0       | 0       | 0       | 0       | 0       | 0       | 0       | 0       |
| 0       | 0       | 0       | 0       | 0       | 0       | 0       | 0       |
| 0       | 0.00073 | 0       | 0.00085 | 0       | 0       | 0       | 0       |
| 0       | 0       | 0       | 0       | 0       | 0.00007 | 0       | 0       |
| 0       | 0       | 0       | 0       | 0       | 0.00007 | 0       | 0       |
| 0.00431 | 0       | 0.11975 | 0.3077  | 0.1516  | 0.09309 | 0       | 0.0959  |

|          |         |          |         |          |         |          |          |
|----------|---------|----------|---------|----------|---------|----------|----------|
| 0        | 0       | 0.00084  | 0.05808 | 0.00149  | 0.00456 | 0        | 0.00359  |
| 0        | 0       | 0.00084  | 0.05808 | 0.00149  | 0.00456 | 0        | 0.00359  |
| 0        | 0       | 0.00321  | 0.12801 | 0.00599  | 0.01094 | 0        | 0.01262  |
| 0        | 0       | 0.00321  | 0.12801 | 0.00599  | 0.01094 | 0        | 0.01262  |
| 0.00431  | 0       | 0.11571  | 0.12161 | 0.14411  | 0.07759 | 0        | 0.0797   |
| 0.00431  | 0       | 0.11571  | 0.12161 | 0.14411  | 0.07759 | 0        | 0.0797   |
| 0        | 0       | 0        | 0       | 0        | 0       | 0        | 0        |
| 0        | 0       | 0        | 0       | 0        | 0       | 0        | 0        |
| 0.10773  | 0.50927 | 8.75745  | 1.64303 | 7.32909  | 0.31782 | 0        | 0.28904  |
| 0        | 0       | 0        | 0       | 0        | 0       | 0        | 0        |
| 0        | 0       | 0        | 0       | 0        | 0       | 0        | 0        |
| 0        | 0       | 0        | 0.00172 | 0        | 0       | 0        | 0        |
| 0        | 0       | 0        | 0.00172 | 0        | 0       | 0        | 0        |
| 0.10773  | 0.50927 | 8.75745  | 1.64131 | 7.32909  | 0.31782 | 0        | 0.28904  |
| 0.00124  | 0       | 0        | 0       | 0        | 0.02044 | 0        | 0.026    |
| 0        | 0       | 0        | 0       | 0        | 0       | 0        | 0        |
| 0.03356  | 0       | 0.35956  | 0.00658 | 0.32712  | 0.05359 | 0        | 0.07908  |
| 0.00017  | 0.00168 | 0.35405  | 0.05779 | 0.39105  | 0       | 0        | 0        |
| 0.00147  | 0       | 0        | 0       | 0        | 0.00246 | 0        | 0.00255  |
| 0        | 0       | 0.1144   | 0.05762 | 0.12559  | 0       | 0        | 0        |
| 0        | 0       | 7.70976  | 1.51409 | 6.2931   | 0       | 0        | 0        |
| 0        | 0       | 0        | 0       | 0        | 0       | 0        | 0        |
| 0        | 0       | 0.07133  | 0.0022  | 0.09773  | 0       | 0        | 0        |
| 0.07129  | 0.50759 | 0        | 0       | 0        | 0.24133 | 0        | 0.18142  |
| 0        | 0       | 0.00008  | 0       | 0.00019  | 0       | 0        | 0        |
| 0        | 0       | 0.14827  | 0.00304 | 0.0943   | 0       | 0        | 0        |
| 0        | 0       | 0        | 0       | 0        | 0       | 0        | 0        |
| 0        | 0       | 0        | 0       | 0        | 0       | 0        | 0        |
| 12.43834 | 1.85615 | 13.94777 | 6.97376 | 18.26564 | 9.75728 | 10.13439 | 11.11761 |
| 0.01307  | 0.37752 | 0.28635  | 0.02458 | 0.17438  | 0       | 0.00308  | 0.00022  |
| 0        | 0       | 0        | 0       | 0        | 0       | 0.00308  | 0.00022  |
| 0.01307  | 0.37752 | 0.28635  | 0.02458 | 0.17438  | 0       | 0        | 0        |
| 0        | 0       | 0        | 0       | 0        | 0.33221 | 0.14195  | 0.60946  |
| 0        | 0       | 0        | 0       | 0        | 0.33221 | 0.14195  | 0.60946  |
| 8.41311  | 0.63368 | 1.63411  | 0.39902 | 2.04733  | 6.31898 | 2.42862  | 7.16993  |

|         |         |         |         |         |         |         |         |
|---------|---------|---------|---------|---------|---------|---------|---------|
| 0       | 0       | 0       | 0       | 0       | 0.00136 | 0       | 0.00237 |
| 0       | 0       | 0       | 0       | 0       | 0       | 0       | 0       |
| 0       | 0       | 0.01845 | 0.08037 | 0.01807 | 0.00569 | 0       | 0.01025 |
| 0       | 0       | 0.81283 | 0.10702 | 0.79386 | 0.36451 | 0       | 0.30832 |
| 0       | 0       | 0       | 0       | 0       | 0.00465 | 0       | 0.00331 |
| 0       | 0       | 0       | 0       | 0       | 0.02039 | 0       | 0.01835 |
| 0.00013 | 0.0188  | 0.15007 | 0.06744 | 0.14211 | 0.0708  | 0       | 0.06612 |
| 8.41298 | 0.61488 | 0.00793 | 0.01942 | 0.01082 | 5.85159 | 2.42862 | 6.76121 |
| 0       | 0       | 0.64483 | 0.12477 | 1.08247 | 0       | 0       | 0       |
| 0       | 0       | 0       | 0       | 0       | 0       | 0       | 0       |
| 0       | 0       | 0       | 0       | 0       | 0       | 0       | 0       |
| 0       | 0       | 0.67313 | 0.04968 | 0.88521 | 0       | 0       | 0       |
| 0       | 0       | 0.21871 | 0.03687 | 0.27983 | 0       | 0       | 0       |
| 0       | 0       | 0.45442 | 0.01281 | 0.60537 | 0       | 0       | 0       |
| 0       | 0       | 0.85682 | 0.16948 | 1.24754 | 0       | 0       | 0       |
| 0       | 0       | 0.25443 | 0.06339 | 0.39026 | 0       | 0       | 0       |
| 0       | 0       | 0.60239 | 0.10608 | 0.85728 | 0       | 0       | 0       |
| 0       | 0       | 0       | 0       | 0       | 0       | 0       | 0       |
| 0.00267 | 0.0089  | 0.04903 | 0.44667 | 0.05807 | 0.0308  | 0       | 0.04115 |
| 0.00267 | 0.0089  | 0       | 0.03187 | 0       | 0       | 0       | 0       |
| 0       | 0       | 0.04903 | 0.41481 | 0.05807 | 0.0308  | 0       | 0.04115 |
| 0       | 0       | 0       | 0       | 0       | 0       | 0.00115 | 0       |
| 0       | 0       | 0       | 0       | 0       | 0       | 0.00115 | 0       |
| 0.02072 | 0       | 0.38146 | 0.01649 | 0.25762 | 0       | 0       | 0       |
| 0.02072 | 0       | 0.38146 | 0.01649 | 0.25762 | 0       | 0       | 0       |
| 0       | 0       | 0       | 0       | 0       | 0       | 0       | 0       |
| 0       | 0       | 0       | 0       | 0       | 0       | 0       | 0       |
| 1.75899 | 0.64779 | 0.06703 | 2.66399 | 0.13266 | 1.02246 | 7.54942 | 0.83275 |
| 0.01583 | 0.00104 | 0.00045 | 0.04266 | 0.0013  | 0.04884 | 0.02062 | 0.03439 |
| 0       | 0       | 0.01501 | 0.09221 | 0.0297  | 0.06931 | 0       | 0.05673 |
| 1.41822 | 0.52847 | 0.00498 | 0.19183 | 0.01834 | 0.6309  | 4.7017  | 0.50701 |
| 0.09512 | 0.028   | 0.04545 | 2.29907 | 0.07894 | 0.13017 | 0.01402 | 0.12236 |
| 0       | 0       | 0       | 0       | 0       | 0       | 0       | 0       |
| 0       | 0       | 0       | 0       | 0       | 0       | 0       | 0.0004  |
| 0.003   | 0.00527 | 0.00025 | 0.02423 | 0.00209 | 0.07062 | 0       | 0.06202 |

|         |         |         |         |         |         |         |         |
|---------|---------|---------|---------|---------|---------|---------|---------|
| 0       | 0       | 0       | 0       | 0       | 0       | 0       | 0       |
| 0       | 0       | 0       | 0       | 0       | 0.00083 | 0       | 0.0009  |
| 0.22682 | 0.08501 | 0       | 0.01399 | 0       | 0.07177 | 2.81307 | 0.04895 |
| 0       | 0       | 0       | 0       | 0       | 0       | 0       | 0       |
| 0       | 0       | 0.00089 | 0       | 0.0023  | 0       | 0       | 0       |
| 0       | 0       | 5.96047 | 0.05456 | 8.30168 | 0.58936 | 0       | 0.80065 |
| 0       | 0       | 3.39098 | 0.17791 | 4.54289 | 0       | 0       | 0       |
| 0       | 0       | 3.39098 | 0.17791 | 4.54289 | 0       | 0       | 0       |
| 0       | 0       | 0       | 0       | 0       | 0       | 0       | 0       |
| 0       | 0       | 0       | 0       | 0       | 0       | 0       | 0       |
| 0       | 0       | 5.96047 | 0.05456 | 8.30168 | 0.58936 | 0       | 0.80065 |
| 0       | 0       | 0       | 0       | 0       | 0       | 0       | 0       |
| 0       | 0       | 0       | 0       | 0       | 0       | 0       | 0       |
| 0       | 0       | 0       | 0       | 0       | 0.04172 | 0.00247 | 0.05454 |
| 0       | 0       | 0       | 0       | 0       | 0.04172 | 0.00247 | 0.05454 |
| 0.00143 | 0       | 0       | 0.0012  | 0       | 0       | 0.00319 | 0       |
| 0       | 0       | 0       | 0       | 0       | 0       | 0       | 0       |
| 0.00143 | 0       | 0       | 0.0012  | 0       | 0       | 0.00319 | 0       |
| 0       | 0       | 0       | 0       | 0       | 0       | 0       | 0       |
| 0       | 0       | 0       | 0       | 0       | 0       | 0       | 0       |
| 0.00121 | 0       | 0.64727 | 2.96892 | 0.61575 | 0.74401 | 0       | 0.99713 |
| 0       | 0       | 0.25864 | 0.13238 | 0.22457 | 0       | 0       | 0       |
| 0       | 0       | 0.19598 | 2.04457 | 0.22064 | 0       | 0       | 0       |
| 0       | 0       | 0.00032 | 0.0007  | 0       | 0       | 0       | 0       |
| 0.00121 | 0       | 0.15264 | 0.78747 | 0.12972 | 0.74401 | 0       | 0.99713 |
| 0       | 0       | 0       | 0       | 0       | 0       | 0       | 0       |
| 0       | 0       | 0.03971 | 0.0038  | 0.04082 | 0       | 0       | 0       |
| 0       | 0       | 0       | 0       | 0       | 0.49724 | 0.00451 | 0.27687 |
| 0       | 0       | 0       | 0       | 0       | 0.49724 | 0.00451 | 0.27687 |
| 0       | 0       | 0       | 0       | 0       | 0       | 0       | 0       |
| 0       | 0       | 0       | 0       | 0       | 0       | 0       | 0       |
| 0       | 0       | 0       | 0.00022 | 0       | 0       | 0       | 0       |
| 0       | 0       | 0       | 0.00022 | 0       | 0       | 0       | 0       |
| 2.22714 | 0.18825 | 0.00111 | 0.00104 | 0.0025  | 0.1805  | 0       | 0.33492 |
| 2.22714 | 0.18825 | 0.00111 | 0.00104 | 0.0025  | 0.1805  | 0       | 0.33492 |

|          |         |         |          |         |         |         |         |
|----------|---------|---------|----------|---------|---------|---------|---------|
| 0        | 0       | 3.99045 | 1.2884   | 3.54136 | 0       | 0       | 0       |
| 0        | 0       | 3.99045 | 1.2884   | 3.54136 | 0       | 0       | 0       |
| 0        | 0       | 3.07204 | 0.75838  | 2.634   | 0       | 0       | 0       |
| 0        | 0       | 0.91841 | 0.53002  | 0.90736 | 0       | 0       | 0       |
| 0.07719  | 0.00544 | 0       | 0        | 0       | 0.1365  | 0.66962 | 0.0206  |
| 0        | 0       | 0       | 0        | 0       | 0       | 0.6634  | 0       |
| 0        | 0       | 0       | 0        | 0       | 0       | 0.6634  | 0       |
| 0        | 0       | 0       | 0        | 0       | 0       | 0       | 0       |
| 0        | 0       | 0       | 0        | 0       | 0       | 0       | 0       |
| 0        | 0       | 0       | 0        | 0       | 0.1365  | 0       | 0.0206  |
| 0        | 0       | 0       | 0        | 0       | 0.1365  | 0       | 0.0206  |
| 0        | 0       | 0       | 0        | 0       | 0       | 0       | 0       |
| 0        | 0       | 0       | 0        | 0       | 0       | 0       | 0       |
| 0        | 0       | 0       | 0        | 0       | 0       | 0       | 0       |
| 0        | 0       | 0       | 0        | 0       | 0       | 0       | 0       |
| 0.07719  | 0       | 0       | 0        | 0       | 0       | 0.00623 | 0       |
| 0        | 0       | 0       | 0        | 0       | 0       | 0       | 0       |
| 0.07719  | 0       | 0       | 0        | 0       | 0       | 0.00623 | 0       |
| 0        | 0.00544 | 0       | 0        | 0       | 0       | 0       | 0       |
| 0        | 0.00544 | 0       | 0        | 0       | 0       | 0       | 0       |
| 0        | 0       | 0       | 0        | 0       | 0       | 0       | 0       |
| 0        | 0       | 0       | 0        | 0       | 0       | 0       | 0       |
| 13.0812  | 3.71757 | 6.39217 | 11.76571 | 6.518   | 6.85102 | 0.14977 | 7.97573 |
| 0.00344  | 0.09892 | 0.09013 | 0.05455  | 0.1356  | 0.09464 | 0       | 0.18453 |
| 0.00344  | 0.09892 | 0.09013 | 0.05455  | 0.1356  | 0.09464 | 0       | 0.18453 |
| 0        | 0       | 0       | 0        | 0       | 0       | 0       | 0       |
| 0        | 0       | 0       | 0        | 0       | 0       | 0       | 0       |
| 0        | 0       | 0.00944 | 0.01593  | 0.0159  | 0       | 0       | 0       |
| 0        | 0       | 0.00944 | 0.01593  | 0.0159  | 0       | 0       | 0       |
| 0.01317  | 0       | 0.02654 | 0.9574   | 0.02637 | 0.05137 | 0       | 0.08586 |
| 0.01317  | 0       | 0.02654 | 0.9574   | 0.02637 | 0.05137 | 0       | 0.08586 |
| 12.40887 | 3.36341 | 2.76175 | 0.64038  | 3.40682 | 0.0002  | 0       | 0       |
| 12.40887 | 3.36341 | 2.76175 | 0.64038  | 3.40682 | 0.0002  | 0       | 0       |
| 0.62989  | 0.19602 | 0.22938 | 1.04413  | 0.19661 | 6.34852 | 0.1439  | 7.37894 |
| 0.62989  | 0.19602 | 0.2206  | 1.01661  | 0.18219 | 6.34852 | 0.1439  | 7.37894 |



|         |         |         |         |         |         |         |         |
|---------|---------|---------|---------|---------|---------|---------|---------|
| 0       | 0       | 0.00878 | 0.02752 | 0.01441 | 0       | 0       | 0       |
| 0       | 0       | 0.12251 | 0.54584 | 0.17048 | 0       | 0       | 0       |
| 0       | 0       | 0.12251 | 0.54584 | 0.17048 | 0       | 0       | 0       |
| 0       | 0       | 0       | 0       | 0       | 0       | 0       | 0       |
| 0       | 0       | 0       | 0       | 0       | 0       | 0       | 0       |
| 0       | 0       | 0       | 0       | 0       | 0.0056  | 0       | 0.00648 |
| 0       | 0       | 0       | 0       | 0       | 0       | 0       | 0       |
| 0       | 0       | 0       | 0       | 0       | 0.0056  | 0       | 0.00648 |
| 0.0012  | 0       | 0.1195  | 0.06705 | 0.08327 | 0.01428 | 0       | 0.02733 |
| 0.0012  | 0       | 0.1195  | 0.01997 | 0.08327 | 0.00444 | 0       | 0.01032 |
| 0       | 0       | 0       | 0.04708 | 0       | 0.00984 | 0       | 0.01701 |
| 0       | 0       | 0       | 0       | 0       | 0       | 0       | 0       |
| 0       | 0       | 0       | 0       | 0       | 0       | 0       | 0       |
| 0       | 0       | 0       | 0       | 0       | 0       | 0       | 0       |
| 0       | 0       | 2.65218 | 0.10671 | 2.15202 | 0       | 0       | 0       |
| 0       | 0       | 0.71662 | 0.00424 | 0.56754 | 0       | 0       | 0       |
| 0       | 0       | 1.31591 | 0.02778 | 0.97378 | 0       | 0       | 0       |
| 0       | 0       | 0       | 0       | 0       | 0       | 0       | 0       |
| 0       | 0       | 0.61965 | 0.07468 | 0.61069 | 0       | 0       | 0       |
| 0       | 0       | 0       | 0       | 0       | 0       | 0       | 0       |
| 0.02463 | 0.05922 | 0.38074 | 8.33373 | 0.33093 | 0.33641 | 0.00587 | 0.2926  |
| 0.02463 | 0.05922 | 0.38074 | 8.33373 | 0.33093 | 0.33641 | 0.00587 | 0.2926  |
| 0.29323 | 1.03783 | 0.10587 | 0.06316 | 0.19474 | 0.4584  | 0.08928 | 0.45156 |
| 0.29323 | 1.03783 | 0.10587 | 0.06316 | 0.19474 | 0.4584  | 0.08928 | 0.45156 |
| 0.29323 | 1.03783 | 0.10587 | 0.06316 | 0.19474 | 0.4584  | 0.08928 | 0.45156 |
| 0       | 0       | 0       | 0       | 0       | 0       | 0       | 0       |
| 0       | 0       | 0       | 0       | 0       | 0       | 0       | 0       |
| 0       | 0       | 0       | 0       | 0       | 0       | 0       | 0       |
| 0       | 0       | 0       | 0       | 0       | 0       | 0       | 0       |
| 0       | 0       | 0       | 0       | 0       | 0       | 0       | 0       |
| 0       | 0       | 0       | 0       | 0       | 0       | 0       | 0       |
| 0       | 0.00921 | 0.01271 | 0       | 0.01201 | 0.06733 | 0.01212 | 0.10238 |
| 0       | 0.00921 | 0.01271 | 0       | 0.01201 | 0.06733 | 0.01212 | 0.10238 |
| 0.01808 | 0.01648 | 0.03235 | 0       | 0.03223 | 0.11591 | 0       | 0.14207 |
| 0.01808 | 0.01648 | 0.03235 | 0       | 0.03223 | 0.11591 | 0       | 0.14207 |

|         |         |         |         |         |         |         |         |
|---------|---------|---------|---------|---------|---------|---------|---------|
| 0       | 0       | 0       | 0       | 0       | 0       | 0       | 0       |
| 0       | 0       | 0       | 0       | 0       | 0       | 0       | 0       |
| 0.27359 | 0.90989 | 0.00103 | 0.05695 | 0.00227 | 0.27049 | 0.07716 | 0.20637 |
| 0.16677 | 0.12615 | 0.00103 | 0       | 0.00227 | 0.02557 | 0       | 0.02225 |
| 0       | 0       | 0       | 0       | 0       | 0.03567 | 0.02331 | 0.00947 |
| 0.10682 | 0.78374 | 0       | 0.05695 | 0       | 0.20926 | 0.05385 | 0.17465 |
| 0       | 0       | 0       | 0       | 0       | 0       | 0       | 0.00035 |
| 0       | 0       | 0       | 0       | 0       | 0       | 0       | 0.00035 |
| 0       | 0       | 0       | 0       | 0       | 0       | 0       | 0       |
| 0       | 0       | 0       | 0       | 0       | 0       | 0       | 0       |
| 0       | 0       | 0       | 0       | 0       | 0       | 0       | 0       |
| 0       | 0       | 0       | 0       | 0       | 0       | 0       | 0       |
| 0       | 0       | 0       | 0       | 0       | 0       | 0       | 0       |
| 0       | 0       | 0       | 0       | 0       | 0       | 0       | 0       |
| 0.00155 | 0.01827 | 0.05977 | 0.0062  | 0.14822 | 0       | 0       | 0       |
| 0.00155 | 0.01827 | 0.05977 | 0.0062  | 0.14822 | 0       | 0       | 0       |
| 0       | 0       | 0       | 0       | 0       | 0       | 0       | 0       |
| 0       | 0       | 0       | 0       | 0       | 0       | 0       | 0       |
| 0       | 0       | 0       | 0       | 0       | 0       | 0       | 0       |
| 0       | 0       | 0       | 0       | 0       | 0       | 0       | 0       |
| 0       | 0.08398 | 0       | 0       | 0       | 0.00467 | 0       | 0.00039 |
| 0       | 0.08398 | 0       | 0       | 0       | 0.00467 | 0       | 0.00039 |
| 0.00147 | 0       | 1.00066 | 0.38608 | 1.15188 | 0.3246  | 0       | 0.28886 |
| 0.00147 | 0       | 1.00066 | 0.38608 | 1.15188 | 0.3246  | 0       | 0.28886 |
| 0.00147 | 0       | 1.00066 | 0.38608 | 1.15188 | 0.3246  | 0       | 0.28886 |
| 0.00147 | 0       | 1.00066 | 0.38608 | 1.15188 | 0.3246  | 0       | 0.28886 |
| 0       | 0       | 0.2511  | 0.05641 | 0.2629  | 0       | 0       | 0       |
| 0       | 0       | 0.01259 | 0.00667 | 0.0131  | 0.05551 | 0       | 0.07727 |
| 0       | 0       | 0.00028 | 0.00328 | 0.0005  | 0       | 0       | 0       |
| 0       | 0       | 0       | 0       | 0       | 0.26909 | 0       | 0.21159 |
| 0       | 0       | 0       | 0       | 0       | 0       | 0       | 0       |
| 0.00147 | 0       | 0.69106 | 0.31762 | 0.83428 | 0       | 0       | 0       |
| 0       | 0       | 0       | 0       | 0       | 0       | 0       | 0       |
| 0       | 0       | 0.04563 | 0.00212 | 0.0411  | 0       | 0       | 0       |
| 3.10252 | 4.28564 | 0.47184 | 0.22056 | 0.44157 | 2.37608 | 1.61596 | 2.10579 |

|         |         |         |         |         |         |         |         |
|---------|---------|---------|---------|---------|---------|---------|---------|
| 2.3707  | 0.09039 | 0.34581 | 0.22056 | 0.36931 | 2.36824 | 1.24008 | 2.10235 |
| 2.3707  | 0.09039 | 0.34581 | 0.22056 | 0.36931 | 2.36824 | 1.24008 | 2.10235 |
| 1.71085 | 0.01484 | 0       | 0       | 0       | 0       | 0       | 0       |
| 1.71085 | 0.01484 | 0       | 0       | 0       | 0       | 0       | 0       |
| 0       | 0       | 0       | 0       | 0       | 0       | 0       | 0       |
| 0.65985 | 0.07554 | 0.34581 | 0.22056 | 0.36931 | 2.36824 | 1.24008 | 2.10235 |
| 0.65985 | 0.07554 | 0.34581 | 0.22056 | 0.36931 | 2.36824 | 1.24008 | 2.10235 |
| 0       | 0       | 0       | 0       | 0       | 0       | 0       | 0       |
| 0.30055 | 1.8544  | 0       | 0       | 0       | 0       | 0       | 0       |
| 0.30055 | 1.8544  | 0       | 0       | 0       | 0       | 0       | 0       |
| 0.30055 | 1.8544  | 0       | 0       | 0       | 0       | 0       | 0       |
| 0.26623 | 1.20674 | 0       | 0       | 0       | 0       | 0       | 0       |
| 0.03431 | 0.64767 | 0       | 0       | 0       | 0       | 0       | 0       |
| 0       | 0       | 0       | 0       | 0       | 0       | 0       | 0       |
| 0       | 0       | 0       | 0       | 0       | 0       | 0       | 0       |
| 0       | 0       | 0       | 0       | 0       | 0       | 0       | 0       |
| 0       | 0       | 0       | 0       | 0       | 0       | 0       | 0       |
| 0       | 0       | 0       | 0       | 0       | 0       | 0       | 0       |
| 0       | 0       | 0       | 0       | 0       | 0       | 0       | 0       |
| 0       | 0       | 0       | 0       | 0       | 0       | 0       | 0       |
| 0.43128 | 2.34085 | 0.12603 | 0       | 0.07226 | 0.00784 | 0.37588 | 0.00345 |
| 0.43128 | 2.34085 | 0.12603 | 0       | 0.07226 | 0.00784 | 0.37588 | 0.00345 |
| 0       | 0       | 0       | 0       | 0       | 0.00174 | 0       | 0.00206 |
| 0       | 0       | 0       | 0       | 0       | 0.00174 | 0       | 0.00206 |
| 0       | 0       | 0       | 0       | 0       | 0       | 0.00433 | 0       |
| 0       | 0       | 0       | 0       | 0       | 0       | 0.00433 | 0       |
| 0.14297 | 0.02639 | 0.00288 | 0       | 0.00113 | 0       | 0.11743 | 0       |
| 0       | 0       | 0.00288 | 0       | 0.00113 | 0       | 0.00151 | 0       |
| 0.06564 | 0       | 0       | 0       | 0       | 0       | 0.11593 | 0       |
| 0.07732 | 0.02639 | 0       | 0       | 0       | 0       | 0       | 0       |
| 0.07104 | 2.2786  | 0       | 0       | 0       | 0.00252 | 0.02354 | 0       |
| 0.04082 | 2.2786  | 0       | 0       | 0       | 0       | 0       | 0       |
| 0       | 0       | 0       | 0       | 0       | 0       | 0       | 0       |
| 0.03022 | 0       | 0       | 0       | 0       | 0.00252 | 0.02354 | 0       |
| 0       | 0       | 0       | 0       | 0.00206 | 0       | 0       | 0       |

|         |         |         |         |         |         |         |         |
|---------|---------|---------|---------|---------|---------|---------|---------|
| 0       | 0       | 0       | 0       | 0.00206 | 0       | 0       | 0       |
| 0.21727 | 0.03587 | 0.12315 | 0       | 0.06908 | 0.00358 | 0.23058 | 0.00139 |
| 0.09672 | 0.00794 | 0.05536 | 0       | 0.02055 | 0.00358 | 0.02163 | 0.00139 |
| 0.01307 | 0.01118 | 0.00229 | 0       | 0.00262 | 0       | 0.00517 | 0       |
| 0.00442 | 0.00565 | 0.00784 | 0       | 0.00375 | 0       | 0.0002  | 0       |
| 0.09048 | 0.00137 | 0.05603 | 0       | 0.04215 | 0       | 0.19795 | 0       |
| 0       | 0       | 0       | 0       | 0       | 0       | 0       | 0       |
| 0       | 0       | 0.00164 | 0       | 0       | 0       | 0       | 0       |
| 0.01258 | 0.00974 | 0       | 0       | 0       | 0       | 0.00562 | 0       |
| 0       | 0       | 0       | 0       | 0       | 0       | 0       | 0       |
| 0       | 0.00915 | 0       | 0       | 0.00157 | 0       | 0.00372 | 0       |
| 0       | 0.00915 | 0       | 0       | 0.00157 | 0       | 0.00372 | 0       |
| 0       | 0.00915 | 0       | 0       | 0.00157 | 0       | 0.00372 | 0       |
| 0       | 0.00915 | 0       | 0       | 0       | 0       | 0       | 0       |
| 0       | 0.00915 | 0       | 0       | 0       | 0       | 0       | 0       |
| 0       | 0       | 0       | 0       | 0       | 0       | 0       | 0       |
| 0       | 0       | 0       | 0       | 0       | 0       | 0       | 0       |
| 0       | 0       | 0       | 0       | 0       | 0       | 0       | 0       |
| 0       | 0       | 0       | 0       | 0       | 0       | 0.00372 | 0       |
| 0       | 0       | 0       | 0       | 0       | 0       | 0.00372 | 0       |
| 0       | 0       | 0       | 0       | 0       | 0       | 0       | 0       |
| 0       | 0       | 0       | 0       | 0.00157 | 0       | 0       | 0       |
| 0       | 0       | 0       | 0       | 0.00132 | 0       | 0       | 0       |
| 0       | 0       | 0       | 0       | 0       | 0       | 0       | 0       |
| 0       | 0       | 0       | 0       | 0.00025 | 0       | 0       | 0       |
| 1.05292 | 0.24572 | 0       | 0.02744 | 0       | 1.40162 | 4.27164 | 1.14073 |
| 1.05292 | 0.24572 | 0       | 0.02744 | 0       | 1.40162 | 4.27164 | 1.14073 |
| 1.05292 | 0.24572 | 0       | 0.02744 | 0       | 1.40162 | 4.27164 | 1.14073 |
| 1.05292 | 0.24572 | 0       | 0.02744 | 0       | 1.40162 | 4.27164 | 1.14073 |
| 0       | 0       | 0       | 0       | 0       | 0       | 0       | 0       |
| 0       | 0       | 0       | 0       | 0       | 0       | 0       | 0       |
| 1.05292 | 0.24572 | 0       | 0.02744 | 0       | 1.40162 | 4.27164 | 1.14073 |
| 0       | 0       | 0       | 0       | 0       | 0       | 0       | 0       |
| 0       | 0       | 0       | 0       | 0       | 0       | 0       | 0       |
| 0       | 0       | 0       | 0       | 0       | 0       | 0       | 0       |

|         |         |         |          |         |          |         |          |
|---------|---------|---------|----------|---------|----------|---------|----------|
| 0       | 0       | 0       | 0        | 0       | 0        | 0       | 0        |
| 0       | 0       | 0       | 0.02744  | 0       | 0        | 0       | 0        |
| 0       | 0       | 0       | 0        | 0       | 0        | 0       | 0        |
| 0       | 0       | 0       | 0        | 0       | 0        | 0       | 0        |
| 1.05292 | 0.24572 | 0       | 0        | 0       | 1.40162  | 4.27164 | 1.14073  |
| 0       | 0       | 0       | 0        | 0       | 0        | 0       | 0        |
| 0       | 0       | 0       | 0        | 0       | 0        | 0       | 0        |
| 0       | 0       | 0       | 0        | 0       | 0        | 0       | 0        |
| 0       | 0       | 0       | 0        | 0       | 0        | 0       | 0        |
| 0       | 0       | 0       | 0        | 0       | 0        | 0       | 0        |
| 0       | 0       | 0       | 0        | 0       | 0        | 0       | 0        |
| 0       | 0       | 0       | 0        | 0       | 0        | 0       | 0        |
| 0       | 0       | 0       | 0        | 0       | 0        | 0       | 0        |
| 0       | 0       | 0       | 0        | 0       | 0        | 0       | 0        |
| 0       | 0       | 0       | 0        | 0       | 0        | 0       | 0        |
| 0       | 0       | 0       | 0        | 0       | 0        | 0       | 0        |
| 0       | 0       | 0       | 0        | 0       | 0        | 0       | 0        |
| 0       | 0       | 0       | 0        | 0       | 0        | 0       | 0        |
| 0       | 0       | 0       | 0        | 0       | 0        | 0       | 0        |
| 0.76091 | 0.97088 | 9.48469 | 13.51489 | 7.97489 | 14.01782 | 5.41853 | 15.83438 |
| 0.02512 | 0.01097 | 2.57568 | 0.01327  | 1.74932 | 1.04783  | 0.20557 | 1.14923  |
| 0.01425 | 0.01097 | 2.57568 | 0.01327  | 1.74828 | 1.04783  | 0.20185 | 1.14923  |
| 0       | 0       | 0       | 0        | 0       | 0        | 0       | 0        |
| 0       | 0       | 0       | 0        | 0       | 0        | 0       | 0        |
| 0       | 0       | 0       | 0        | 0       | 0        | 0       | 0        |
| 0       | 0       | 0       | 0        | 0       | 0        | 0       | 0        |
| 0       | 0       | 0       | 0        | 0       | 0        | 0       | 0        |
| 0       | 0       | 0       | 0        | 0       | 0        | 0       | 0        |
| 0       | 0       | 0.20145 | 0.00978  | 0.25081 | 0.07068  | 0       | 0.06158  |
| 0       | 0       | 0.20145 | 0.00978  | 0.25081 | 0.07068  | 0       | 0.06158  |
| 0       | 0       | 0.20145 | 0.00978  | 0.25081 | 0.07068  | 0       | 0.06158  |
| 0.01425 | 0.01097 | 2.37424 | 0.00349  | 1.49747 | 0.97714  | 0.20185 | 1.08765  |
| 0       | 0       | 2.36526 | 0.00349  | 1.49063 | 0.97303  | 0.2014  | 1.0809   |
| 0       | 0       | 2.36526 | 0.00349  | 1.49063 | 0.97303  | 0.2014  | 1.0809   |
| 0.01425 | 0.01097 | 0       | 0        | 0       | 0        | 0       | 0        |
| 0.01425 | 0.01097 | 0       | 0        | 0       | 0        | 0       | 0        |

|         |         |         |         |         |          |         |          |
|---------|---------|---------|---------|---------|----------|---------|----------|
| 0       | 0       | 0.00897 | 0       | 0.00684 | 0.00411  | 0.00045 | 0.00676  |
| 0       | 0       | 0.00897 | 0       | 0.00684 | 0.00411  | 0.00045 | 0.00676  |
| 0.01087 | 0       | 0       | 0       | 0.00104 | 0        | 0.00372 | 0        |
| 0.01087 | 0       | 0       | 0       | 0.00104 | 0        | 0.00372 | 0        |
| 0.00178 | 0       | 0       | 0       | 0       | 0        | 0.00372 | 0        |
| 0.00178 | 0       | 0       | 0       | 0       | 0        | 0.00372 | 0        |
| 0.00909 | 0       | 0       | 0       | 0.00104 | 0        | 0       | 0        |
| 0       | 0       | 0       | 0       | 0       | 0        | 0       | 0        |
| 0.00198 | 0       | 0       | 0       | 0.00038 | 0        | 0       | 0        |
| 0       | 0       | 0       | 0       | 0       | 0        | 0       | 0        |
| 0       | 0       | 0       | 0       | 0       | 0        | 0       | 0        |
| 0.00711 | 0       | 0       | 0       | 0.00066 | 0        | 0       | 0        |
| 0.04656 | 0.00354 | 0.15713 | 0.02481 | 0.19738 | 0.09817  | 0.02455 | 0.09177  |
| 0.04656 | 0.00354 | 0.15713 | 0.02481 | 0.19738 | 0.09817  | 0.02455 | 0.09177  |
| 0.04656 | 0.00354 | 0.15713 | 0.02481 | 0.19738 | 0.09817  | 0.02455 | 0.09177  |
| 0.04656 | 0.00354 | 0.15713 | 0.02481 | 0.19738 | 0.09817  | 0.02455 | 0.09177  |
| 0.04656 | 0.00354 | 0.15713 | 0.02481 | 0.19738 | 0.09817  | 0.02455 | 0.09177  |
| 0       | 0       | 0       | 0       | 0       | 0        | 0       | 0        |
| 0       | 0       | 0       | 0       | 0       | 0        | 0       | 0        |
| 0       | 0       | 0       | 0       | 0       | 0        | 0       | 0        |
| 0.00241 | 0       | 0       | 0.21781 | 0       | 0        | 0.00061 | 0        |
| 0.00241 | 0       | 0       | 0.21781 | 0       | 0        | 0.00061 | 0        |
| 0.00241 | 0       | 0       | 0.21781 | 0       | 0        | 0.00061 | 0        |
| 0.00241 | 0       | 0       | 0.21781 | 0       | 0        | 0.00061 | 0        |
| 0.00241 | 0       | 0       | 0.21781 | 0       | 0        | 0       | 0        |
| 0       | 0       | 0       | 0       | 0       | 0        | 0.00061 | 0        |
| 0       | 0       | 0       | 0       | 0       | 0        | 0       | 0        |
| 0       | 0       | 0       | 0       | 0       | 0        | 0       | 0        |
| 0       | 0       | 0       | 0       | 0       | 0        | 0       | 0        |
| 0       | 0       | 0       | 0       | 0       | 0        | 0       | 0        |
| 0       | 0       | 0       | 0       | 0       | 0        | 0       | 0        |
| 0       | 0       | 0       | 0       | 0       | 0        | 0       | 0        |
| 0       | 0       | 0       | 0       | 0       | 0        | 0       | 0        |
| 0       | 0       | 0       | 0       | 0       | 0        | 0       | 0        |
| 0.68682 | 0.95637 | 6.66267 | 13.259  | 5.97207 | 12.82676 | 5.17864 | 14.54303 |
| 0       | 0       | 0       | 0       | 0       | 0        | 0       | 0        |









|   |   |         |         |         |         |   |         |
|---|---|---------|---------|---------|---------|---|---------|
| 0 | 0 | 0       | 0       | 0       | 0       | 0 | 0       |
| 0 | 0 | 0       | 0       | 0       | 0       | 0 | 0       |
| 0 | 0 | 0       | 0       | 0       | 0       | 0 | 0       |
| 0 | 0 | 0       | 0       | 0       | 0       | 0 | 0       |
| 0 | 0 | 0       | 0       | 0       | 0       | 0 | 0       |
| 0 | 0 | 0       | 0       | 0       | 0       | 0 | 0       |
| 0 | 0 | 2.32279 | 1.91398 | 1.23005 | 0       | 0 | 0       |
| 0 | 0 | 2.32279 | 1.91398 | 1.23005 | 0       | 0 | 0       |
| 0 | 0 | 2.32279 | 1.91398 | 1.23005 | 0       | 0 | 0       |
| 0 | 0 | 2.32279 | 1.91398 | 1.23005 | 0       | 0 | 0       |
| 0 | 0 | 2.32279 | 1.91398 | 1.23005 | 0       | 0 | 0       |
| 0 | 0 | 2.3026  | 1.9056  | 1.2091  | 0       | 0 | 0       |
| 0 | 0 | 0       | 0       | 0       | 0       | 0 | 0       |
| 0 | 0 | 2.3026  | 1.9056  | 1.2091  | 0       | 0 | 0       |
| 0 | 0 | 0.02019 | 0.00838 | 0.02095 | 0       | 0 | 0       |
| 0 | 0 | 0.02019 | 0.00838 | 0.02095 | 0       | 0 | 0       |
| 0 | 0 | 0       | 0       | 0       | 0.00052 | 0 | 0.00063 |
| 0 | 0 | 0       | 0       | 0       | 0.00052 | 0 | 0.00063 |
| 0 | 0 | 0       | 0       | 0       | 0.00052 | 0 | 0.00063 |
| 0 | 0 | 0       | 0       | 0       | 0.00052 | 0 | 0.00063 |
| 0 | 0 | 0       | 0       | 0       | 0       | 0 | 0       |
| 0 | 0 | 0       | 0       | 0       | 0       | 0 | 0       |
| 0 | 0 | 0       | 0       | 0       | 0       | 0 | 0       |
| 0 | 0 | 0       | 0       | 0       | 0.00052 | 0 | 0.00063 |
| 0 | 0 | 0       | 0       | 0       | 0.00052 | 0 | 0.00063 |
| 0 | 0 | 0       | 0       | 0       | 0.00052 | 0 | 0.00063 |

---

| AP020_1 | AP020_2 | AP020_3 |
|---------|---------|---------|
| 100     | 100     | 100     |
| 0.04076 | 0.05655 | 0.08382 |
| 0.031   | 0.03506 | 0.06805 |
| 0       | 0.0048  | 0       |
| 0       | 0.0048  | 0       |
| 0       | 0       | 0       |
| 0       | 0       | 0       |
| 0       | 0.0048  | 0       |
| 0       | 0       | 0       |
| 0       | 0       | 0       |
| 0       | 0       | 0       |
| 0       | 0       | 0       |
| 0       | 0       | 0       |
| 0       | 0.00287 | 0       |
| 0       | 0       | 0       |
| 0       | 0       | 0       |
| 0       | 0       | 0       |
| 0       | 0       | 0       |
| 0       | 0.00193 | 0       |
| 0       | 0       | 0       |
| 0       | 0       | 0       |
| 0       | 0       | 0       |
| 0       | 0       | 0       |
| 0       | 0       | 0       |
| 0.031   | 0.03019 | 0.06805 |
| 0.031   | 0.03019 | 0.06805 |
| 0       | 0       | 0       |
| 0       | 0       | 0       |
| 0       | 0       | 0       |
| 0       | 0       | 0       |
| 0.031   | 0.03019 | 0.06805 |

|         |         |         |
|---------|---------|---------|
| 0       | 0       | 0       |
| 0       | 0       | 0       |
| 0       | 0       | 0       |
| 0       | 0       | 0       |
| 0       | 0       | 0       |
| 0.031   | 0.03019 | 0.06805 |
| 0       | 0       | 0       |
| 0       | 0       | 0       |
| 0       | 0       | 0       |
| 0       | 0       | 0       |
| 0       | 0       | 0       |
| 0       | 0       | 0       |
| 0       | 0       | 0       |
| 0       | 0       | 0       |
| 0       | 0       | 0       |
| 0       | 0       | 0       |
| 0       | 0.00007 | 0       |
| 0       | 0.00007 | 0       |
| 0       | 0.00007 | 0       |
| 0       | 0       | 0       |
| 0       | 0       | 0       |
| 0       | 0.00007 | 0       |
| 0       | 0       | 0       |
| 0       | 0       | 0       |
| 0       | 0       | 0       |
| 0       | 0       | 0       |
| 0       | 0       | 0       |
| 0       | 0       | 0       |
| 0.00976 | 0.02149 | 0.01577 |
| 0.00395 | 0.00597 | 0.00603 |
| 0       | 0.0002  | 0       |
| 0       | 0.0002  | 0       |
| 0       | 0       | 0       |
| 0       | 0.0002  | 0       |

|          |          |          |
|----------|----------|----------|
| 0        | 0        | 0        |
| 0        | 0        | 0        |
| 0        | 0        | 0        |
| 0        | 0        | 0        |
| 0.00395  | 0.00577  | 0.00603  |
| 0.00395  | 0.00577  | 0.00603  |
| 0.00395  | 0.00577  | 0.00603  |
| 0        | 0        | 0        |
| 0        | 0        | 0        |
| 0        | 0        | 0        |
| 0        | 0        | 0        |
| 0        | 0        | 0        |
| 0.00581  | 0.01552  | 0.00974  |
| 0.00581  | 0.01552  | 0.00974  |
| 0.0035   | 0.00251  | 0.00659  |
| 0.0035   | 0.00251  | 0.00659  |
| 0.00082  | 0.00061  | 0.00155  |
| 0.00082  | 0.00061  | 0.00155  |
| 0.00135  | 0.0095   | 0.0016   |
| 0.00135  | 0.0095   | 0.0016   |
| 0        | 0        | 0        |
| 0        | 0        | 0        |
| 0.00014  | 0.00129  | 0        |
| 0.00014  | 0.00129  | 0        |
| 0        | 0.00161  | 0        |
| 0        | 0.00161  | 0        |
| 85.52464 | 83.72484 | 80.74614 |
| 0        | 0        | 0        |
| 0        | 0        | 0        |
| 0        | 0        | 0        |
| 0        | 0        | 0        |
| 0        | 0        | 0        |
| 85.52464 | 83.72484 | 80.74614 |
| 85.52464 | 83.72484 | 80.74614 |
| 67.76315 | 60.92915 | 62.97679 |

|          |          |          |
|----------|----------|----------|
| 67.76315 | 60.92915 | 62.97679 |
| 6.18699  | 2.29655  | 4.24415  |
| 1.36553  | 2.97274  | 1.95056  |
| 0        | 0        | 0        |
| 0.1428   | 0.48769  | 0.19625  |
| 0        | 0        | 0        |
| 0.00013  | 0        | 0.00015  |
| 1.88949  | 1.70951  | 1.6556   |
| 0        | 0        | 0        |
| 0.10654  | 0.33975  | 0.06958  |
| 1.96077  | 1.74453  | 3.10685  |
| 1.6044   | 3.75983  | 1.56874  |
| 0.02766  | 0.06305  | 0.03248  |
| 0.74863  | 0.53066  | 0.95485  |
| 0        | 0        | 0        |
| 0.63042  | 3.40351  | 0.60863  |
| 0        | 0        | 0        |
| 2.59772  | 2.56357  | 3.93959  |
| 10.37088 | 13.38691 | 13.25289 |
| 1.0754   | 3.17338  | 1.19323  |
| 4.81618  | 7.91281  | 5.8451   |
| 29.21876 | 12.25141 | 21.84792 |
| 5.02083  | 4.33324  | 2.51022  |
| 0        | 0        | 0        |
| 0        | 0        | 0        |
| 0        | 0        | 0        |
| 0        | 0        | 0        |
| 0        | 0        | 0        |
| 0        | 0        | 0        |
| 0.69968  | 0.86623  | 0.86649  |
| 0.69968  | 0.86623  | 0.86649  |
| 0.00273  | 0.00585  | 0.00226  |
| 0.69696  | 0.86038  | 0.86423  |
| 0        | 0        | 0        |
| 0        | 0        | 0        |

|         |          |         |
|---------|----------|---------|
| 0       | 0        | 0       |
| 0       | 0        | 0       |
| 0       | 0        | 0       |
| 0       | 0        | 0       |
| 0       | 0        | 0       |
| 0       | 0        | 0       |
| 0       | 0        | 0       |
| 0       | 0        | 0       |
| 8.28141 | 13.38875 | 7.39229 |
| 0       | 0.00253  | 0       |
| 0       | 0.00253  | 0       |
| 0       | 0        | 0       |
| 0       | 0        | 0       |
| 0       | 0        | 0       |
| 8.28141 | 13.38621 | 7.39229 |
| 0.00093 | 0.00171  | 0       |
| 0       | 0.03891  | 0       |
| 0       | 0        | 0       |
| 0       | 0        | 0       |
| 0       | 0        | 0       |
| 0       | 0.00549  | 0       |
| 0       | 0        | 0       |
| 0       | 0.1534   | 0       |
| 0       | 0        | 0       |
| 0       | 0        | 0       |
| 0       | 0.00756  | 0       |
| 0       | 0.00821  | 0       |
| 0       | 0        | 0       |
| 0       | 0        | 0       |
| 0       | 0        | 0       |
| 8.28048 | 13.17093 | 7.39229 |
| 0       | 0        | 0       |
| 0       | 0        | 0       |
| 0.05105 | 0.28199  | 0.06287 |
| 0.05105 | 0.28199  | 0.06287 |

|         |          |          |
|---------|----------|----------|
| 0       | 0        | 0        |
| 0.04957 | 0.28062  | 0.06112  |
| 0       | 0        | 0        |
| 0       | 0        | 0        |
| 0.00144 | 0.00132  | 0.00175  |
| 0.00004 | 0.00005  | 0        |
| 8.72935 | 8.25874  | 9.4477   |
| 8.72935 | 8.25874  | 9.4477   |
| 7.26965 | 7.41421  | 7.96212  |
| 0.31021 | 0.0211   | 0.34074  |
| 0.00245 | 0.00092  | 0.00316  |
| 0       | 0        | 0        |
| 1.14704 | 0.82251  | 1.14168  |
| 0       | 0        | 0        |
| 0       | 0        | 0        |
| 0       | 0        | 0        |
| 0       | 0        | 0        |
| 0       | 0        | 0        |
| 0       | 0        | 0        |
| 0       | 0        | 0        |
| 13.4361 | 13.64101 | 18.32824 |
| 0.01751 | 1.54173  | 0.03198  |
| 0       | 0.02402  | 0        |
| 0       | 0.02402  | 0        |
| 0       | 0.02402  | 0        |
| 0       | 0        | 0        |
| 0       | 0.007    | 0        |
| 0       | 0.00086  | 0        |
| 0       | 0.01616  | 0        |
| 0.01751 | 1.51771  | 0.03198  |
| 0       | 0        | 0        |
| 0       | 0        | 0        |
| 0       | 0        | 0        |
| 0       | 0        | 0        |
| 0       | 0        | 0        |



|         |         |         |
|---------|---------|---------|
| 0       | 0       | 0       |
| 0       | 0       | 0       |
| 0       | 0       | 0       |
| 0       | 0       | 0       |
| 0       | 0       | 0       |
| 0       | 0       | 0       |
| 0       | 0       | 0       |
| 0       | 0       | 0       |
| 0       | 0       | 0       |
| 0       | 0       | 0       |
| 0       | 0       | 0       |
| 0       | 0       | 0       |
| 0       | 0       | 0       |
| 0       | 0       | 0       |
| 0.00694 | 0.00875 | 0.00543 |
| 0.00694 | 0.00875 | 0.00543 |
| 0       | 0       | 0       |
| 0       | 0       | 0       |
| 0       | 0.00225 | 0       |
| 0       | 0       | 0       |
| 0       | 0       | 0       |
| 0       | 0       | 0       |
| 0       | 0       | 0       |
| 0.00694 | 0       | 0.00543 |
| 0       | 0.0065  | 0       |
| 0       | 0       | 0       |
| 0       | 0       | 0       |
| 0       | 0       | 0       |
| 0       | 0       | 0       |
| 0       | 0       | 0       |
| 0       | 0       | 0       |
| 0       | 0       | 0       |
| 0       | 0       | 0       |
| 0.01057 | 1.50896 | 0.02655 |

|         |         |          |
|---------|---------|----------|
| 0.01057 | 1.50896 | 0.02655  |
| 0       | 0.26924 | 0        |
| 0       | 0.00177 | 0        |
| 0       | 0       | 0        |
| 0       | 0       | 0        |
| 0       | 0.01063 | 0        |
| 0       | 0.09428 | 0        |
| 0       | 0       | 0        |
| 0       | 0.00134 | 0        |
| 0.00016 | 0.03922 | 0        |
| 0       | 0       | 0        |
| 0.00026 | 0.33397 | 0.00111  |
| 0.01    | 0.66322 | 0.02531  |
| 0       | 0       | 0        |
| 0       | 0       | 0        |
| 0.00007 | 0.01491 | 0        |
| 0.00008 | 0.00919 | 0.00013  |
| 0       | 0       | 0        |
| 0       | 0.0012  | 0        |
| 0       | 0.00485 | 0        |
| 0       | 0       | 0        |
| 0       | 0       | 0        |
| 0       | 0       | 0        |
| 0       | 0       | 0        |
| 0       | 0.02792 | 0        |
| 0       | 0       | 0        |
| 0       | 0       | 0        |
| 0       | 0.03723 | 0        |
| 0       | 0       | 0        |
| 12.2119 | 3.73317 | 16.50196 |
| 12.2119 | 3.73317 | 16.50196 |
| 0.0016  | 0.00053 | 0.00387  |
| 0.0016  | 0.00053 | 0.00387  |
| 0.0016  | 0.00053 | 0.00387  |
| 0       | 0       | 0        |

|         |         |         |
|---------|---------|---------|
| 0       | 0       | 0       |
| 0       | 0       | 0       |
| 0.24023 | 0.36299 | 0.3491  |
| 0       | 0       | 0       |
| 0       | 0       | 0       |
| 0.20664 | 0.27041 | 0.27863 |
| 0       | 0       | 0       |
| 0.16702 | 0.27041 | 0.25568 |
| 0       | 0       | 0       |
| 0       | 0       | 0       |
| 0       | 0       | 0       |
| 0       | 0       | 0       |
| 0       | 0       | 0       |
| 0       | 0       | 0       |
| 0       | 0       | 0       |
| 0.03881 | 0       | 0.02221 |
| 0       | 0       | 0       |
| 0       | 0       | 0       |
| 0       | 0       | 0       |
| 0.00081 | 0       | 0.00074 |
| 0       | 0       | 0       |
| 0.03359 | 0.09258 | 0.07047 |
| 0       | 0       | 0       |
| 0.03359 | 0.09258 | 0.07047 |
| 0       | 0       | 0       |
| 0       | 0       | 0       |
| 0.00055 | 0.00915 | 0.00098 |
| 0       | 0       | 0       |
| 0       | 0       | 0       |
| 0       | 0       | 0       |
| 0       | 0       | 0       |
| 0       | 0       | 0       |
| 0.00055 | 0.00915 | 0.00098 |
| 0.00055 | 0.00915 | 0.00098 |
| 0.05204 | 0.00613 | 0.1232  |

|         |         |         |
|---------|---------|---------|
| 0.00307 | 0.00309 | 0.00791 |
| 0.00307 | 0.00309 | 0.00791 |
| 0.03554 | 0.00304 | 0.09229 |
| 0.03554 | 0.00304 | 0.09229 |
| 0.01342 | 0       | 0.023   |
| 0.01342 | 0       | 0.023   |
| 0       | 0       | 0       |
| 0       | 0       | 0       |
| 1.09772 | 0.03546 | 1.67555 |
| 0       | 0       | 0       |
| 0       | 0       | 0       |
| 0       | 0       | 0       |
| 0       | 0       | 0       |
| 1.09772 | 0.03546 | 1.67555 |
| 0       | 0       | 0       |
| 0       | 0       | 0       |
| 0.75925 | 0.00213 | 1.10452 |
| 0       | 0       | 0       |
| 0.00026 | 0.00082 | 0.00042 |
| 0.00908 | 0       | 0.01831 |
| 0       | 0       | 0       |
| 0.32913 | 0.03251 | 0.5523  |
| 0       | 0       | 0       |
| 0       | 0       | 0       |
| 0       | 0       | 0       |
| 0       | 0       | 0       |
| 0       | 0       | 0       |
| 0       | 0       | 0       |
| 5.42428 | 2.79969 | 5.83839 |
| 0.0085  | 0.04907 | 0.00693 |
| 0.00147 | 0       | 0.00073 |
| 0.00702 | 0.04907 | 0.0062  |
| 0       | 0       | 0       |
| 0       | 0       | 0       |
| 0.23091 | 0.37642 | 0.25611 |

|         |         |         |
|---------|---------|---------|
| 0       | 0       | 0       |
| 0       | 0       | 0       |
| 0.02262 | 0.00464 | 0.0108  |
| 0.00443 | 0.01076 | 0.0023  |
| 0.00944 | 0.0009  | 0.01309 |
| 0       | 0       | 0       |
| 0.00767 | 0.26139 | 0.01031 |
| 0.18675 | 0.09872 | 0.2196  |
| 0       | 0       | 0       |
| 0       | 0       | 0       |
| 0       | 0       | 0       |
| 0.03256 | 0       | 0.04363 |
| 0.00277 | 0       | 0.00394 |
| 0.02979 | 0       | 0.03969 |
| 0.00109 | 0.0019  | 0.00255 |
| 0       | 0       | 0       |
| 0.00109 | 0.0019  | 0.00255 |
| 0       | 0       | 0       |
| 0       | 0       | 0       |
| 0       | 0       | 0       |
| 0       | 0       | 0       |
| 0       | 0       | 0       |
| 0       | 0       | 0       |
| 0.01097 | 0       | 0.01243 |
| 0.01097 | 0       | 0.01243 |
| 0       | 0       | 0       |
| 0       | 0       | 0       |
| 0.61894 | 1.07753 | 1.11739 |
| 0.00203 | 0.00705 | 0.00523 |
| 0.045   | 0.03754 | 0.07858 |
| 0.437   | 0.91773 | 0.77435 |
| 0.05175 | 0.07617 | 0.10473 |
| 0       | 0       | 0       |
| 0       | 0       | 0       |
| 0.00304 | 0.00263 | 0.00347 |

|         |         |         |
|---------|---------|---------|
| 0.04884 | 0.00152 | 0.08821 |
| 0.00464 | 0.00008 | 0.00223 |
| 0.02664 | 0.03483 | 0.06058 |
| 0       | 0       | 0       |
| 0       | 0       | 0       |
| 1.94841 | 0.02435 | 2.29118 |
| 0       | 0       | 0       |
| 0       | 0       | 0       |
| 0       | 0       | 0       |
| 0       | 0       | 0       |
| 1.94841 | 0.02435 | 2.29118 |
| 0       | 0       | 0       |
| 0       | 0       | 0       |
| 0       | 0       | 0       |
| 0       | 0       | 0       |
| 0       | 0.00062 | 0       |
| 0       | 0       | 0       |
| 0       | 0.00062 | 0       |
| 0       | 0       | 0       |
| 0       | 0       | 0       |
| 2.51815 | 1.26969 | 2.0393  |
| 2.36649 | 1.20692 | 1.92684 |
| 0       | 0       | 0       |
| 0.14708 | 0       | 0.10785 |
| 0.00458 | 0.06277 | 0.0046  |
| 0       | 0       | 0       |
| 0       | 0       | 0       |
| 0.05083 | 0       | 0.06518 |
| 0.05083 | 0       | 0.06518 |
| 0       | 0       | 0       |
| 0       | 0       | 0       |
| 0       | 0       | 0       |
| 0       | 0       | 0       |
| 0.00394 | 0.00012 | 0.00368 |
| 0.00394 | 0.00012 | 0.00368 |

|         |         |         |
|---------|---------|---------|
| 0       | 0       | 0       |
| 0       | 0       | 0       |
| 0       | 0       | 0       |
| 0       | 0       | 0       |
| 0       | 0.00108 | 0       |
| 0       | 0       | 0       |
| 0       | 0       | 0       |
| 0       | 0       | 0       |
| 0       | 0       | 0       |
| 0       | 0       | 0       |
| 0       | 0       | 0       |
| 0       | 0       | 0       |
| 0       | 0       | 0       |
| 0       | 0       | 0       |
| 0       | 0.00108 | 0       |
| 0       | 0       | 0       |
| 0       | 0.00108 | 0       |
| 0       | 0       | 0       |
| 0       | 0       | 0       |
| 0       | 0       | 0       |
| 0       | 0       | 0       |
| 5.39549 | 0.51814 | 8.51086 |
| 0.03003 | 0.02755 | 0.09265 |
| 0.03003 | 0.02755 | 0.09265 |
| 0       | 0       | 0       |
| 0       | 0       | 0       |
| 0       | 0       | 0       |
| 0       | 0       | 0       |
| 0.00563 | 0.12429 | 0.02103 |
| 0.00563 | 0.12429 | 0.02103 |
| 3.48457 | 0.25631 | 5.87865 |
| 3.48457 | 0.25631 | 5.87865 |
| 0.7083  | 0.04588 | 1.16335 |
| 0.7083  | 0.04588 | 1.16335 |

|         |         |         |
|---------|---------|---------|
| 0       | 0       | 0       |
| 0.00254 | 0       | 0.00165 |
| 0.00254 | 0       | 0.00165 |
| 0       | 0       | 0       |
| 0       | 0       | 0       |
| 0       | 0       | 0       |
| 0       | 0       | 0       |
| 0       | 0       | 0       |
| 0.03453 | 0       | 0.0231  |
| 0.03453 | 0       | 0.0231  |
| 0       | 0       | 0       |
| 0       | 0       | 0       |
| 0       | 0       | 0       |
| 0       | 0       | 0       |
| 1.06839 | 0.05662 | 1.12789 |
| 0.14714 | 0       | 0.09868 |
| 0.83868 | 0.05662 | 1.00568 |
| 0.08217 | 0       | 0.02352 |
| 0.00039 | 0       | 0       |
| 0       | 0       | 0       |
| 0.0615  | 0.00749 | 0.20254 |
| 0.0615  | 0.00749 | 0.20254 |
| 0.21915 | 0.03391 | 0.10793 |
| 0.21915 | 0.03391 | 0.10793 |
| 0.21915 | 0.03391 | 0.10793 |
| 0       | 0       | 0       |
| 0       | 0       | 0       |
| 0       | 0       | 0       |
| 0       | 0       | 0       |
| 0       | 0       | 0       |
| 0       | 0       | 0       |
| 0.01219 | 0.00097 | 0.00021 |
| 0.01219 | 0.00097 | 0.00021 |
| 0       | 0       | 0       |
| 0       | 0       | 0       |



|         |         |         |
|---------|---------|---------|
| 0       | 0       | 0       |
| 0       | 0       | 0       |
| 0.18634 | 0.03073 | 0.06914 |
| 0.18468 | 0.01265 | 0.06614 |
| 0       | 0       | 0       |
| 0.00166 | 0.01808 | 0.003   |
| 0       | 0       | 0       |
| 0       | 0       | 0       |
| 0       | 0       | 0       |
| 0       | 0       | 0       |
| 0       | 0       | 0       |
| 0       | 0       | 0       |
| 0       | 0       | 0       |
| 0       | 0       | 0       |
| 0.02062 | 0.00221 | 0.03858 |
| 0.02062 | 0.00221 | 0.03858 |
| 0       | 0       | 0       |
| 0       | 0       | 0       |
| 0       | 0       | 0       |
| 0       | 0       | 0       |
| 0       | 0       | 0       |
| 0       | 0       | 0       |
| 0.3574  | 0.03285 | 0.62145 |
| 0.3574  | 0.03285 | 0.62145 |
| 0.3574  | 0.03285 | 0.62145 |
| 0.3574  | 0.03285 | 0.62145 |
| 0.00086 | 0       | 0.00182 |
| 0       | 0       | 0       |
| 0       | 0       | 0       |
| 0       | 0       | 0       |
| 0       | 0       | 0       |
| 0.35565 | 0.03285 | 0.61716 |
| 0       | 0       | 0       |
| 0.0009  | 0       | 0.00246 |
| 0.63014 | 8.27557 | 1.06493 |

|         |         |         |
|---------|---------|---------|
| 0.62896 | 3.64863 | 1.06373 |
| 0.62896 | 3.64863 | 1.06373 |
| 0.03079 | 2.89528 | 0.04336 |
| 0.03079 | 2.89528 | 0.04336 |
| 0       | 0       | 0       |
| 0.59817 | 0.75335 | 1.02036 |
| 0.59817 | 0.75335 | 1.02036 |
| 0       | 0       | 0       |
| 0       | 0.00064 | 0       |
| 0       | 0.00064 | 0       |
| 0       | 0       | 0       |
| 0       | 0       | 0       |
| 0       | 0       | 0       |
| 0       | 0       | 0       |
| 0       | 0       | 0       |
| 0       | 0.00064 | 0       |
| 0       | 0       | 0       |
| 0       | 0       | 0       |
| 0       | 0       | 0       |
| 0       | 0.00064 | 0       |
| 0.00118 | 4.62631 | 0.0012  |
| 0.00118 | 4.62631 | 0.0012  |
| 0       | 0.00118 | 0       |
| 0       | 0.00118 | 0       |
| 0       | 0.00264 | 0       |
| 0       | 0.00264 | 0       |
| 0       | 0.23312 | 0       |
| 0       | 0.00401 | 0       |
| 0       | 0.22911 | 0       |
| 0       | 0       | 0       |
| 0.00118 | 0.838   | 0.0012  |
| 0.00108 | 0.67222 | 0.00113 |
| 0.00009 | 0.00267 | 0.00007 |
| 0       | 0.16311 | 0       |
| 0       | 0       | 0       |

|         |         |         |
|---------|---------|---------|
| 0       | 0       | 0       |
| 0       | 3.55137 | 0       |
| 0       | 1.89005 | 0       |
| 0       | 0.22759 | 0       |
| 0       | 0.07019 | 0       |
| 0       | 1.09491 | 0       |
| 0       | 0       | 0       |
| 0       | 0       | 0       |
| 0       | 0.22958 | 0       |
| 0       | 0.03904 | 0       |
| 0       | 0.02378 | 0       |
| 0       | 0.02378 | 0       |
| 0       | 0.02378 | 0       |
| 0       | 0       | 0       |
| 0       | 0       | 0       |
| 0       | 0       | 0       |
| 0       | 0       | 0       |
| 0       | 0       | 0       |
| 0       | 0.02378 | 0       |
| 0       | 0.02378 | 0       |
| 0       | 0       | 0       |
| 0       | 0       | 0       |
| 0       | 0       | 0       |
| 0       | 0       | 0       |
| 0       | 0       | 0       |
| 0.18047 | 1.61295 | 0.10237 |
| 0.18047 | 1.61295 | 0.10237 |
| 0.18047 | 1.61295 | 0.10237 |
| 0.18047 | 1.61295 | 0.10237 |
| 0       | 0       | 0       |
| 0       | 0       | 0       |
| 0.18047 | 1.61295 | 0.10237 |
| 0       | 0       | 0       |
| 0       | 0       | 0       |
| 0       | 0.0056  | 0       |

|         |         |         |
|---------|---------|---------|
| 0       | 0.12888 | 0       |
| 0       | 0.1288  | 0       |
| 0       | 0.06413 | 0       |
| 0       | 0       | 0       |
| 0.18047 | 1.28554 | 0.10237 |
| 0       | 0       | 0       |
| 0       | 0       | 0       |
| 0       | 0       | 0       |
| 0       | 0       | 0       |
| 0       | 0       | 0       |
| 0       | 0       | 0       |
| 0       | 0       | 0       |
| 0       | 0       | 0       |
| 0       | 0       | 0       |
| 0       | 0       | 0       |
| 0       | 0       | 0       |
| 0       | 0       | 0       |
| 0.77678 | 0.7369  | 0.64463 |
| 0.32497 | 0.07252 | 0.37005 |
| 0.32497 | 0.05981 | 0.37005 |
| 0       | 0       | 0       |
| 0       | 0       | 0       |
| 0       | 0       | 0       |
| 0       | 0       | 0       |
| 0       | 0       | 0       |
| 0       | 0       | 0       |
| 0.04722 | 0.01602 | 0.05095 |
| 0.04722 | 0.01602 | 0.05095 |
| 0.04722 | 0.01602 | 0.05095 |
| 0.27775 | 0.04379 | 0.3191  |
| 0.26197 | 0.04062 | 0.30089 |
| 0.26197 | 0.04062 | 0.30089 |
| 0       | 0       | 0       |
| 0       | 0       | 0       |

|         |         |         |
|---------|---------|---------|
| 0.01578 | 0.00317 | 0.01821 |
| 0.01578 | 0.00317 | 0.01821 |
| 0       | 0.01272 | 0       |
| 0       | 0.01272 | 0       |
| 0       | 0       | 0       |
| 0       | 0       | 0       |
| 0       | 0.01272 | 0       |
| 0       | 0       | 0       |
| 0       | 0.00577 | 0       |
| 0       | 0.00065 | 0       |
| 0       | 0.0052  | 0       |
| 0       | 0.0011  | 0       |
| 0.14414 | 0.06135 | 0.14643 |
| 0.14414 | 0.06135 | 0.14643 |
| 0.14414 | 0.06135 | 0.14643 |
| 0.14266 | 0.06067 | 0.14514 |
| 0.14266 | 0.06067 | 0.14514 |
| 0.00148 | 0.00068 | 0.00129 |
| 0.00148 | 0.00068 | 0.00129 |
| 0       | 0       | 0       |
| 0       | 0.00219 | 0       |
| 0       | 0.00219 | 0       |
| 0       | 0.00219 | 0       |
| 0       | 0.00219 | 0       |
| 0       | 0.00032 | 0       |
| 0       | 0.0005  | 0       |
| 0       | 0.00137 | 0       |
| 0       | 0       | 0       |
| 0       | 0       | 0       |
| 0       | 0       | 0       |
| 0       | 0       | 0       |
| 0       | 0       | 0       |
| 0       | 0       | 0       |
| 0       | 0       | 0       |
| 0.29427 | 0.59969 | 0.1142  |
| 0       | 0       | 0       |











**Table S3. Differential species across treatment phase, severity, and etiology**

| SampleID                        | Adjust P-values | Difference between means | 95.0% lower CI | 95.0% upper CI | Comparison groups                        | Enriched group |
|---------------------------------|-----------------|--------------------------|----------------|----------------|------------------------------------------|----------------|
| Eubacterium_sp_CAG_274          | 0.042620773     | 0.02361105               | 0.000868053    | 0.046354048    | Pre vs. On-treatment                     | Pre-treatment  |
| Fusicatenibacter_saccharivorans | 0.03525162      | 0.199433696              | 0.015298144    | 0.383569248    | Pre vs. On-treatment                     | Pre-treatment  |
| Lachnospira_pectinoschiza       | 0.030816166     | 0.865322608              | 0.08929132     | 1.641353896    | Pre vs. On-treatment                     | Pre-treatment  |
| Oribacterium_sinus              | 0.046590666     | -0.000428421             | -0.00084964    | -0.0000072     | Pre vs. On-treatment                     | On-treatment   |
| Roseburia_inulinivorans         | 0.035832265     | 1.153351435              | 0.08510331     | 2.22159956     | Pre vs. On-treatment                     | Pre-treatment  |
| Streptococcus_parasanguinis     | 0.04822434      | -0.217766306             | -0.433655691   | -0.00187692    | Pre vs. On-treatment                     | On-treatment   |
| Anaerotruncus_colihominis       | 0.018179304     | -0.014672481             | -0.026556517   | -0.002788444   | Pre vs. Post-treatment                   | Pre-treatment  |
| Eggerthella_lenta               | 0.006031167     | 0.018081956              | 0.005809009    | 0.030354902    | On vs. Post-treatment                    | On-treatment   |
| Gordonibacter_pamelaeeae        | 0.023582869     | 0.002422857              | 0.000355426    | 0.004490289    | On vs. Post-treatment                    | On-treatment   |
| Butyricimonas_virosa            | 0.046404889     | 0.081964064              | 0.001418959    | 0.162509169    | On vs. Post-treatment                    | On-treatment   |
| Blautia_wexlerae                | 0.016081794     | -0.021772329             | -0.039129232   | -0.004415427   | On vs. Post-treatment                    | Post-treatment |
| Agathobaculum_butyriciproducens | 0.04306713      | -0.006655564             | -0.013090222   | -0.000220906   | On vs. Post-treatment                    | Post-treatment |
| Anaerotruncus_colihominis       | 0.036817469     | 0.019174737              | 0.00130709     | 0.037042385    | On vs. Post-treatment                    | On-treatment   |
| Bacteroides_xyloxylicus         | 0.034155028     | 1.585618349              | 0.138597217    | 3.032639481    | MAP <sup>1</sup> vs. SAP <sup>2</sup>    | MAP            |
| Clostridium_avalense            | 0.014691339     | 0.020494869              | 0.004619461    | 0.036370278    | MAP vs. SAP                              | MAP            |
| Roseburia_inulinivorans         | 0.035349907     | 1.663361046              | 0.134424199    | 3.192297893    | MAP vs. SAP                              | MAP            |
| s__Alistipes_shahii             | 0.04233647      | 0.087769741              | 0.003530193    | 0.172009289    | BAP <sup>3</sup> vs. HGT-AP <sup>4</sup> | BAP            |
| s__Escherichia_coli             | 0.004498098     | 1.326004074              | 0.490101724    | 2.161906424    | BAP vs. HGT-AP                           | BAP            |
| s__Rothia_mucilaginosa          | 0.003863597     | 0.00070631               | 0.000271182    | 0.001141437    | BAP vs. HGT-AP                           | BAP            |

<sup>1</sup> MAP: mild acute pancreatitis

<sup>2</sup> SAP: severe acute pancreatitis

<sup>3</sup> BP: biliary acute pancreatitis

<sup>4</sup> HP: hypertriglyceridemia-induced pancreatitis

**Table S4. The abundance of pathways**

| Pathway                                         | AP001_1  | AP001_2  | AP001_3  | AP002_1  | AP002_2  | AP002_3  | AP003_1  | AP003_2  | AP003_3  | AP004_1  | AP004_2  | AP004_3  |
|-------------------------------------------------|----------|----------|----------|----------|----------|----------|----------|----------|----------|----------|----------|----------|
| UNMAPPED                                        | 10455143 | 12948455 | 13418634 | 10683290 | 11304146 | 11545220 | 17443825 | 21186519 | 29740253 | 24095191 | 8611683  | 11562749 |
| UNINTEGRATED                                    | 49587904 | 58547905 | 58632983 | 68926055 | 81876008 | 71185898 | 1E+08    | 63851000 | 1.33E+08 | 63888285 | 1.73E+08 | 2.14E+08 |
| DTDPRHAMSYN-PWY: dTDP-&beta;-L-rham             | 51512.61 | 53550.74 | 52724.6  | 44049.4  | 60888.22 | 41884.28 | 54311.73 | 27530.28 | 48411.4  | 27182.09 | 46857.44 | 14980.94 |
| PWY66-429: fatty acid biosynthesis initiation ( | 38308.81 | 40572.63 | 41327.5  | 29904.42 | 38030.45 | 36685.54 | 38632.07 | 23103.35 | 44308.41 | 24449.65 | 54597.16 | 67607.24 |
| VALSYN-PWY: L-valine biosynthesis               | 37385.83 | 40469.86 | 40573.87 | 29573.49 | 43491.7  | 40354.47 | 53221.75 | 27359.59 | 66831.38 | 33823.87 | 90162.27 | 112157.9 |
| PWY-5686: UMP biosynthesis I                    | 36353.13 | 37628.09 | 40020.6  | 26177.68 | 38741.58 | 34995.32 | 38206.13 | 26932.37 | 44785.42 | 26905.79 | 39398.38 | 49219.72 |
| PWY-7790: UMP biosynthesis II                   | 36353.13 | 37628.09 | 40020.6  | 26177.68 | 38741.58 | 34995.32 | 38206.13 | 26932.37 | 44785.42 | 26905.79 | 31892.87 | 40241.77 |
| PWY-7791: UMP biosynthesis III                  | 36353.13 | 37628.09 | 40020.6  | 26177.68 | 38741.58 | 34995.32 | 38206.13 | 26932.37 | 44785.42 | 26905.79 | 31892.87 | 40241.77 |
| PWY-1042: glycolysis IV                         | 35590.75 | 42208.94 | 38866    | 33478.15 | 34826.11 | 34299.39 | 47052.73 | 36651.12 | 60623.89 | 41010.84 | 105266.9 | 122915.2 |
| PWY-6609: adenine and adenosine salvage I       | 35575.61 | 37575.63 | 37877.2  | 27023.19 | 39073.18 | 35647.02 | 40810.71 | 36623.37 | 53320.19 | 38568    | 53908.07 | 67388.42 |
| PWY-6163: chorismate biosynthesis from 3-d      | 34885.27 | 35520.58 | 37174.38 | 26349.34 | 39696.51 | 34811.31 | 34992.64 | 26493.81 | 42775.98 | 26385.38 | 44223.16 | 58749.93 |
| NONMEVIPP-PWY: methylerythritol phosphat        | 34684.95 | 34880.17 | 36235.42 | 25752.49 | 39136.44 | 35368.1  | 36283.27 | 21409.03 | 42574.29 | 20903.19 | 45668.52 | 51241.95 |
| HISTSYN-PWY: L-histidine biosynthesis           | 33983.21 | 33583.26 | 32156.41 | 23605.3  | 40113.8  | 32771.96 | 33195.23 | 16384.48 | 36331.22 | 18104.12 | 36241.91 | 45924.81 |
| PWY-6385: peptidoglycan biosynthesis III (my    | 33940.41 | 36076.55 | 36219.53 | 26928.17 | 41530    | 37220.7  | 39982.33 | 25292.36 | 50130.44 | 24422.34 | 70813.78 | 86930.59 |
| PWY-6386: UDP-N-acetylmuramoyl-pentapep         | 33737.99 | 35399.35 | 36491.51 | 25447.47 | 38510.52 | 35874.49 | 38236.35 | 24277.7  | 47227.6  | 23008.48 | 61373.95 | 73568.37 |
| PWY-7229: superpathway of adenosine nucle       | 33530.99 | 38356.71 | 36158.21 | 29433.66 | 33088.6  | 33529.28 | 38609.87 | 20504.1  | 50833.85 | 21308.01 | 36133.61 | 42326.83 |
| PWY-7221: guanosine ribonucleotides de nov      | 33495.79 | 37181.59 | 37662.72 | 28352.85 | 39550.06 | 35696.1  | 38955.22 | 29394.55 | 51747.91 | 29275.88 | 53403.99 | 65705.53 |
| PWY-6700: queuosine biosynthesis I (de nov      | 33481.11 | 34873.2  | 35535.74 | 24019.27 | 44051.75 | 35305.17 | 34432.37 | 20661.47 | 36987.12 | 17291.2  | 50757.93 | 65550.54 |
| PWY-6387: UDP-N-acetylmuramoyl-pentapep         | 33477.93 | 35261.94 | 36243.26 | 26037.77 | 40305.23 | 35912.58 | 39124.66 | 24173.87 | 48211.15 | 23126.18 | 66974.11 | 83197.5  |
| PWY-5695: inosine 5 -phosphate degradation      | 33418.26 | 37819.37 | 35586    | 29279.11 | 42754.45 | 35924.51 | 46100.59 | 18090.97 | 62503.95 | 21540.22 | 89510.87 | 115178   |
| PWY-6121: 5-aminoimidazole ribonucleotide I     | 33250.95 | 35682.45 | 34936.69 | 25731.87 | 34329.4  | 33379.84 | 38371.65 | 25052.8  | 49068.6  | 23259.54 | 76552.33 | 88723.04 |
| PEPTIDOGLYCANSYN-PWY: peptidoglycan             | 32993.1  | 34890.28 | 36156.09 | 25900.01 | 40184.49 | 35858.5  | 38091.9  | 24255.81 | 47889.27 | 23306.73 | 65750.36 | 80947.34 |
| PWY-7953: UDP-N-acetylmuramoyl-pentapep         | 32544.6  | 34175.6  | 35698.22 | 25246.34 | 38376.55 | 35951.99 | 37917.27 | 18274.45 | 47258.48 | 16090.2  | 65569.92 | 75634.15 |
| PWY-6122: 5-aminoimidazole ribonucleotide I     | 32477.12 | 35394.83 | 34138.22 | 25074.43 | 32221.49 | 32250.46 | 38832.05 | 25452.64 | 47557.51 | 24101.7  | 78387.6  | 90298.17 |
| PWY-6277: superpathway of 5-aminoimidazo        | 32477.12 | 35394.83 | 34138.22 | 25074.43 | 32221.49 | 32250.46 | 38832.05 | 25452.64 | 47557.51 | 24101.7  | 78387.6  | 90298.17 |
| PWY0-1586: peptidoglycan maturation (meso       | 32252.09 | 37157.14 | 34893.2  | 36100.55 | 49784.29 | 42026.23 | 83195.36 | 32701.7  | 122042.5 | 45741.44 | 265044.9 | 326898.4 |
| COA-PWY-1: superpathway of coenzyme A b         | 32031.7  | 33982.74 | 33606.34 | 24639.11 | 39322.97 | 34274.76 | 34102.87 | 20939.79 | 41104.91 | 19886.58 | 32687.76 | 41898.26 |
| ARO-PWY: chorismate biosynthesis I              | 31979.53 | 33328.24 | 35803    | 25726.25 | 37397.25 | 33047.91 | 35879.26 | 25721.56 | 44973.09 | 25774.59 | 51807.83 | 67693.66 |
| TRNA-CHARGING-PWY: tRNA charging                | 31568.09 | 34665.97 | 35309.37 | 25000.79 | 34045.76 | 33192.32 | 37965.39 | 22633.37 | 46441.47 | 23562.74 | 62137.32 | 77314.91 |
| PWY-5667: CDP-diacylglycerol biosynthesis I     | 31439.32 | 33582.84 | 34117.46 | 26596.88 | 40080.41 | 34626.71 | 41328.04 | 24008.49 | 56777.14 | 21921.69 | 99172.65 | 155829.4 |
| PWY0-1319: CDP-diacylglycerol biosynthesis      | 31439.32 | 33686.28 | 34122.31 | 26596.88 | 40092.49 | 34635.29 | 41328.04 | 24008.49 | 56777.14 | 21924.59 | 99172.65 | 155830.1 |
| PWY-3841: folate transformations II (plants)    | 31434.78 | 34007.25 | 34094.27 | 29406.57 | 42802.86 | 39265.12 | 36652.04 | 29410.55 | 46129.8  | 26324.62 | 42938.16 | 57083.95 |
| COA-PWY: coenzyme A biosynthesis I (proka       | 30854.27 | 32933.42 | 32334.45 | 24206.16 | 36906.38 | 33287.64 | 34082.19 | 19405.67 | 42154.21 | 18847.74 | 34702.35 | 44212.91 |

|                                              |          |          |          |          |          |          |          |          |          |          |          |          |
|----------------------------------------------|----------|----------|----------|----------|----------|----------|----------|----------|----------|----------|----------|----------|
| PWY-7851: coenzyme A biosynthesis II (euka   | 30854.27 | 32814.97 | 32334.45 | 23900.82 | 36266.89 | 32234.42 | 32005.26 | 19330.26 | 38406.09 | 18399.8  | 29671.1  | 38525.26 |
| PWY-7977: L-methionine biosynthesis IV       | 30227.68 | 33820.13 | 31687.89 | 28729.42 | 47641.78 | 36262.05 | 40806.96 | 18249.2  | 52217.82 | 22138.85 | 63099.13 | 82360.58 |
| PWY-7238: sucrose biosynthesis II            | 29993.12 | 26518.11 | 34117.72 | 16918.34 | 39429.68 | 33856.29 | 36606.07 | 28001.62 | 50812.72 | 34438.67 | 81678.11 | 98190.3  |
| PWY-5097: L-lysine biosynthesis VI           | 29981.18 | 30098.3  | 32281.35 | 23256.87 | 31007.1  | 28284.3  | 33726.97 | 23911.29 | 44773.17 | 31378.89 | 40810.98 | 53228.39 |
| PWY-2942: L-lysine biosynthesis III          | 29932.18 | 31751.41 | 29290.68 | 25372.41 | 37830.75 | 31886.03 | 34073.87 | 23091.58 | 46506.02 | 31278.77 | 48365.62 | 66430    |
| PWY-6126: superpathway of adenosine nucle    | 29838.62 | 35008.4  | 32506.7  | 27785.26 | 27347.61 | 28828.63 | 34592.04 | 16478.79 | 46817.11 | 16609.86 | 36134.53 | 41826.28 |
| COMPLETE-ARO-PWY: superpathway of arc        | 29838.16 | 31337.12 | 33476.96 | 22843.07 | 26725.37 | 28610.64 | 34054.4  | 24233.32 | 43896.92 | 24487.25 | 53431.64 | 67786.73 |
| PWY-5973: cis-vaccenate biosynthesis         | 29769.2  | 32593.27 | 30844.47 | 27649.98 | 40711.66 | 32508.29 | 32019.67 | 9980.443 | 28717.63 | 11224.63 | 36908.69 | 45542.11 |
| PANTO-PWY: phosphopantothenate biosynth      | 29741.65 | 29965.34 | 29639    | 26628.22 | 43270.85 | 34016.05 | 34918.52 | 16338.98 | 39821.6  | 12434.78 | 51173.18 | 74314.74 |
| PWY-6123: inosine-5 -phosphate biosynthesi   | 29716.07 | 32897.94 | 31306.15 | 24958.3  | 38728.8  | 32544.99 | 29142.94 | 12782.71 | 38812.89 | 11137.19 | 48888.31 | 62060.32 |
| ANAGLYCOLYSIS-PWY: glycolysis III (from c    | 29404.75 | 32744.27 | 33848.91 | 25435.96 | 29461.39 | 29559.24 | 37517.04 | 27005.88 | 48077.11 | 28681.58 | 72081.15 | 81070.46 |
| PWY-7199: pyrimidine deoxyribonucleosides    | 29354.88 | 30304.42 | 30754.36 | 25708.34 | 36532.06 | 32706.69 | 29199.36 | 13658.04 | 30129.74 | 14445.49 | 38968.81 | 50869.06 |
| 1CMET2-PWY: folate transformations III (E. c | 29238.77 | 33367.71 | 31896.47 | 29714.78 | 41595.69 | 36271.61 | 37991.96 | 23989.39 | 46799.52 | 24562.16 | 43968.72 | 61489.3  |
| PANTOSYN-PWY: superpathway of coenzym        | 29003.35 | 30810.97 | 30323.37 | 24515.25 | 38907.51 | 32684.97 | 32638.63 | 15465.55 | 39076.19 | 11152.37 | 38234.69 | 51925.84 |
| PWY-6124: inosine-5 -phosphate biosynthesi   | 28960.49 | 32311.7  | 30388.74 | 24772.71 | 38242.51 | 31783.64 | 28087.5  | 11750.37 | 29609.36 | 10108.69 | 32642.7  | 44808.11 |
| ILEUSYN-PWY: L-isoleucine biosynthesis I (fi | 28698.2  | 30353.93 | 31370.75 | 24386.4  | 42144.16 | 35984.13 | 37465.72 | 21952.42 | 50669.82 | 25130.94 | 70937.41 | 91332.88 |
| PWY-6151: S-adenosyl-L-methionine salvage    | 28687.55 | 27228.89 | 27137.29 | 17675.95 | 34513.28 | 30654.87 | 28356.46 | 23619.53 | 35118.33 | 25569.07 | 48904.41 | 83323.96 |
| PWY-7663: gondoate biosynthesis (anaerobic   | 27787.69 | 30800.42 | 28526.98 | 26491.86 | 40638.74 | 31041.16 | 32941.08 | 8747.279 | 49182.72 | 13975.87 | 112219.8 | 137168.4 |
| THRESYN-PWY: superpathway of L-threonin      | 27643.03 | 30567.46 | 29816.64 | 25539.11 | 43497.82 | 32901.04 | 35581.36 | 9428.799 | 45415.59 | 17898.91 | 68093.71 | 76400.88 |
| RIBOSYN2-PWY: flavin biosynthesis I (bacter  | 27362.62 | 28963.99 | 28227.83 | 21309.46 | 24146.92 | 22025.88 | 28317.45 | 12839.01 | 29450.44 | 13438.07 | 18062.23 | 31694.66 |
| PWY-7228: superpathway of guanosine nucle    | 27347.51 | 33126.43 | 29790.48 | 27859.63 | 25063.77 | 26344.29 | 33630.26 | 15600.86 | 47309.27 | 15190.17 | 53375.84 | 61324.14 |
| BRANCHED-CHAIN-AA-SYN-PWY: superpat          | 27309.24 | 28679.9  | 29875.06 | 23558.21 | 41070.69 | 34801.91 | 34679.81 | 20298.39 | 47119.07 | 22886.21 | 64865.29 | 83679.03 |
| PWY-724: superpathway of L-lysine, L-threon  | 26632.74 | 28207.91 | 27290.86 | 21001.91 | 28354.58 | 25409.46 | 33039.19 | 19034.17 | 38371.16 | 24800.06 | 45796.85 | 54511.62 |
| PWY-6703: preQ0 biosynthesis                 | 26631.83 | 26359.94 | 28523.05 | 23316.71 | 38380.45 | 31249.99 | 27092.79 | 5164.15  | 31129.74 | 5930.758 | 30307.1  | 41686.41 |
| PWY-841: superpathway of purine nucleotide:  | 26205.52 | 29787.71 | 29100.05 | 20905.73 | 21122.83 | 25894.2  | 32682.45 | 16191.64 | 41554.61 | 15294.46 | 49345.92 | 59641.61 |
| ASPASN-PWY: superpathway of L-aspartate      | 25836.29 | 30630.13 | 23305.87 | 24870.32 | 39330.8  | 28343.76 | 34540.9  | 4960.546 | 38055.17 | 14782.2  | 90098.19 | 117888.2 |
| PWY-6125: superpathway of guanosine nucle    | 25449.48 | 31159.59 | 27909.63 | 26570.58 | 22291.44 | 24003.88 | 31060.2  | 13545.99 | 44216.63 | 13087.92 | 49971.25 | 56705.15 |
| PYRIDNUCSYN-PWY: NAD de novo biosyntf        | 24841.64 | 26576.62 | 27584.82 | 22210.36 | 25870.41 | 25278.13 | 30466.66 | 14472.89 | 34309.39 | 14630.82 | 55499.93 | 58968.3  |
| PWY-5103: L-isoleucine biosynthesis III      | 24779.71 | 25932.02 | 27115.06 | 21527.72 | 40491.04 | 33190.03 | 31049.82 | 18641.88 | 42482.87 | 20618.51 | 60136.92 | 77892.2  |
| SER-GLYSYN-PWY: superpathway of L-serin      | 24361.19 | 25926.68 | 23246.09 | 22109.23 | 31835.26 | 29712.87 | 31457.01 | 20410.83 | 41822.55 | 25421.56 | 57207.96 | 76343.43 |
| CALVIN-PWY: Calvin-Benson-Bassham cycle      | 23061.75 | 29624.3  | 28108.74 | 23606.96 | 26215.47 | 26722.1  | 44269.87 | 38664.02 | 62793.73 | 44849.45 | 86875.18 | 103003.8 |
| ARGININE-SYN4-PWY: L-ornithine biosynthe     | 22876.85 | 22757.46 | 21639.89 | 19804.97 | 35356.17 | 25664.2  | 20513.48 | 1390.345 | 23758.24 | 2094.464 | 48099.79 | 53314.51 |
| GLYCOGENSYNTH-PWY: glycogen biosynth         | 22740.31 | 23829.44 | 28282.09 | 14991    | 14662.39 | 19355.92 | 27245.15 | 26601.08 | 44804.45 | 30792.92 | 56605.76 | 74928.25 |
| PWY-7220: adenosine deoxyribonucleotides (   | 22329.88 | 28952.9  | 23973.98 | 26566.73 | 18126.03 | 20415.47 | 28786.54 | 10458.34 | 42489.7  | 10095.8  | 50783.32 | 55886.22 |
| PWY-7222: guanosine deoxyribonucleotides (   | 22329.88 | 28952.9  | 23973.98 | 26566.73 | 18126.03 | 20415.47 | 28786.54 | 10458.34 | 42489.7  | 10095.8  | 50783.32 | 55886.22 |

|                                                |          |          |          |          |          |          |          |          |          |          |          |          |
|------------------------------------------------|----------|----------|----------|----------|----------|----------|----------|----------|----------|----------|----------|----------|
| PWY-6270: isoprene biosynthesis I              | 21932.22 | 23713    | 28362.37 | 21144.13 | 29121.63 | 21059.45 | 29752.98 | 14533.62 | 38364.01 | 14749.76 | 27242.71 | 30931.92 |
| PWY-6147: 6-hydroxymethyl-dihydropterin di     | 21672.79 | 23455.29 | 22273.32 | 19655.54 | 24554.95 | 21996.75 | 23602.66 | 4876.854 | 24175.69 | 5587.183 | 37120.36 | 41610.08 |
| RHAMCAT-PWY: L-rhamnose degradation I          | 21405.55 | 18300.06 | 24737.52 | 18098.39 | 14578.33 | 18158.79 | 22989.45 | 12089.19 | 27583.59 | 12652.9  | 49515.44 | 66862.56 |
| PWY-7560: methylerythritol phosphate pathw     | 21063.69 | 22984.02 | 27845.02 | 21115.57 | 28427.67 | 20052.63 | 30307.79 | 14317.94 | 40297.73 | 14742.55 | 45668.52 | 51241.95 |
| PWY-3001: superpathway of L-isoleucine bio     | 20866.64 | 23785.31 | 21986.61 | 14823.29 | 19964.11 | 22912.12 | 30981.46 | 12216.57 | 43647.92 | 20148.21 | 68728.03 | 78901.07 |
| PWY-5941: glycogen degradation II              | 20728.34 | 22592.02 | 26186.77 | 17198.27 | 29411.45 | 22237.78 | 31542.28 | 26651.04 | 45172.27 | 31793.47 | 79144.19 | 102400.6 |
| PWY-6897: thiamine diphosphate salvage II      | 20646.87 | 20327.85 | 21075.99 | 11908.06 | 15698.6  | 19149    | 21944.37 | 10470.4  | 22666.38 | 12523.92 | 39141.82 | 54570.96 |
| PHOSLIPSYN-PWY: superpathway of phosph         | 20622.12 | 20616.66 | 20967.54 | 17371    | 21734.83 | 18205.36 | 36197.54 | 10733.86 | 45861.04 | 13708.6  | 93259.78 | 125536.5 |
| HISDEG-PWY: L-histidine degradation I          | 20326.22 | 22540.88 | 21071.31 | 18915.42 | 34671.21 | 22851.73 | 12768.25 | 8128.551 | 9396.771 | 9348.037 | 254.3206 | 3210.658 |
| PWY0-1296: purine ribonucleosides degradat     | 19963.35 | 19294.02 | 24576.17 | 11059.92 | 10016.25 | 19413.26 | 36741.45 | 37629.5  | 55031.93 | 39514.36 | 60614.36 | 76791.3  |
| ARGSYN-PWY: L-arginine biosynthesis I (via     | 19696.76 | 20531.92 | 23405.45 | 11079.64 | 10605.47 | 18308.96 | 27141.49 | 24236.88 | 43176.83 | 28050.19 | 62512.72 | 73823.02 |
| GLYCOLYSIS: glycolysis I (from glucose 6-ph    | 19464.51 | 19450.12 | 14780.17 | 20889.5  | 25418.83 | 21917.85 | 35357.88 | 11877.49 | 44911.77 | 17127.59 | 74333.67 | 89443.06 |
| PWY-5030: L-histidine degradation III          | 19445.36 | 19835.69 | 18477.8  | 15611.58 | 31795.99 | 20479.26 | 11689.64 | 1739.117 | 8570.878 | 0        | 13.19672 | 20.3064  |
| PWY-5121: superpathway of geranylgeranyl c     | 19345.45 | 20356.2  | 17772.77 | 16822.66 | 10032.5  | 13423.28 | 20167.24 | 777.8516 | 21725.62 | 4434.228 | 4541.362 | 11965.98 |
| PWY-5484: glycolysis II (from fructose 6-phos  | 19341.25 | 19255.8  | 14574.56 | 20674.76 | 25351.82 | 21502.95 | 33302.36 | 10320.81 | 41299.52 | 14728.95 | 66875.23 | 80298.13 |
| CITRULBIO-PWY: L-citrulline biosynthesis       | 19311.45 | 20596.3  | 15612.99 | 13538.68 | 13328.17 | 19144.27 | 21025.61 | 1291.162 | 28060.43 | 3057.804 | 58365.97 | 61407.06 |
| PWY-7357: thiamine phosphate formation fro     | 19224.02 | 17603.99 | 20098    | 9153.951 | 11668.25 | 16574.28 | 20065.28 | 16741.67 | 26032.13 | 15476.23 | 35399.89 | 47863.91 |
| PWY-7400: L-arginine biosynthesis IV (archae   | 19112.82 | 19946.8  | 20047.79 | 10867.6  | 10478.06 | 18110.18 | 26625.1  | 23531.24 | 43065.65 | 27734.11 | 60428.86 | 67681.36 |
| PWY-5154: L-arginine biosynthesis III (via N-ε | 18876.01 | 20076.03 | 21857.28 | 12126.72 | 14529.55 | 20077.84 | 25290.5  | 17390.94 | 41347.41 | 22583.36 | 57810.9  | 66182.95 |
| ARGSYNBSUB-PWY: L-arginine biosynthesis        | 18679.19 | 17499.62 | 22641.69 | 10424.71 | 9339.616 | 17518    | 24678.14 | 23382.55 | 42816.82 | 27077.14 | 61854.52 | 73459.2  |
| PWY-7237: myo-, chiro- and scyllo-inositol de  | 18402.82 | 17451.56 | 23764.62 | 0        | 12165.03 | 20073.01 | 25483.36 | 14731.67 | 30674.29 | 14503.68 | 0        | 31641.22 |
| PWY-7282: 4-amino-2-methyl-5-diphosphome       | 18382.74 | 18202.33 | 18599.2  | 10705.65 | 14031.09 | 19873.75 | 23222.75 | 5150.638 | 25405.48 | 11347.71 | 52316.3  | 68832.84 |
| PWY-7208: superpathway of pyrimidine nucle     | 17969.27 | 22644.36 | 20967.61 | 11496.86 | 14049.69 | 18050.01 | 21414.75 | 11426.69 | 35952.25 | 11131.79 | 38545.46 | 43144.43 |
| THISYNARA-PWY: superpathway of thiamine        | 17929.75 | 16661.27 | 18026.72 | 8283.365 | 12376.25 | 17373.22 | 18488.26 | 10646.21 | 16463.66 | 9238.118 | 290.0643 | 8.578068 |
| ANAEROFrucAT-PWY: homolactic ferment           | 17906.67 | 17177.3  | 15806.15 | 15188.68 | 19270.08 | 15287.85 | 25585.18 | 11856.62 | 37026.93 | 15993.36 | 50165.75 | 63927.72 |
| PWY0-845: superpathway of pyridoxal 5 -pho     | 17088.54 | 18334.63 | 17253.41 | 17603.29 | 24124.87 | 24194.22 | 25120.13 | 2005.789 | 23671.34 | 6124.182 | 52645.61 | 66937.2  |
| PWY-8187: L-arginine degradation XIII (reduc   | 16907.03 | 18491.05 | 12628.7  | 10907.53 | 6388.135 | 9285.624 | 18681.21 | 4420.336 | 23695.09 | 5980.096 | 49481.93 | 53745.82 |
| PWY-8178: pentose phosphate pathway (non       | 16802.41 | 23300.62 | 22248.55 | 19248.39 | 19776.58 | 21713.72 | 38400.58 | 46023.74 | 58426.08 | 49578.37 | 127333   | 149877.5 |
| GLUTORN-PWY: L-ornithine biosynthesis I        | 16337.87 | 17160.26 | 20289.74 | 9786.848 | 11710.35 | 16430.25 | 25690.36 | 17598.99 | 39119.89 | 19565.28 | 61415.07 | 73395.94 |
| PWY-6901: superpathway of glucose and xylc     | 15875.13 | 18352.09 | 19322.44 | 16626.82 | 16728.19 | 16396.57 | 28768.1  | 16867.09 | 38941.4  | 21853.67 | 63692.33 | 92103.2  |
| PWY-1269: CMP-3-deoxy-D-manno-octulosoi        | 15393.7  | 13688.68 | 13980.22 | 14363.67 | 15513.31 | 16394.66 | 24399.97 | 5161.08  | 32755.8  | 6215.093 | 73570.94 | 86168.79 |
| PWY-5659: GDP-mannose biosynthesis             | 15391.41 | 15133.89 | 11318.23 | 11078.29 | 18647.09 | 18697.74 | 20411.35 | 11495.53 | 26718.34 | 13413.46 | 1867.245 | 30895    |
| PYRIDOXSYN-PWY: pyridoxal 5 -phosphate         | 15347.34 | 16450.28 | 16412.24 | 16534.93 | 37500.28 | 25223.65 | 22332.52 | 1385.259 | 22317.81 | 4298.142 | 42648.53 | 53423.19 |
| PENTOSE-P-PWY: pentose phosphate pathw         | 15337.93 | 21113.28 | 18368.69 | 19107.09 | 20091.46 | 20692.04 | 31813.67 | 27511.85 | 41903.64 | 31614.82 | 104670.8 | 126466.7 |
| PWY4FS-7: phosphatidylglycerol biosynthesis    | 15159.4  | 14147.26 | 16055.93 | 11506.46 | 13465.23 | 12340.2  | 29214.91 | 8951.687 | 40239.91 | 12323.38 | 89561.28 | 118622.8 |

|                                                |          |          |          |          |          |          |          |          |          |          |          |          |
|------------------------------------------------|----------|----------|----------|----------|----------|----------|----------|----------|----------|----------|----------|----------|
| PWY4FS-8: phosphatidylglycerol biosynthesis    | 15159.4  | 14141.16 | 16055.21 | 11506.46 | 13464.32 | 12339.48 | 29214.91 | 8951.687 | 40239.91 | 12322.77 | 89561.28 | 118622.5 |
| PWY-7392: taxadiene biosynthesis (engineer     | 15107.04 | 16731.34 | 15094.44 | 15507.83 | 7614.118 | 11602.1  | 17289.42 | 284.7671 | 13109.64 | 2564.002 | 1230.918 | 5786.494 |
| OANTIGEN-PWY: O-antigen building blocks I      | 14752.76 | 18753.41 | 15099.37 | 11122.38 | 12547.85 | 19188.57 | 24669.73 | 19304.41 | 35834.61 | 18846.68 | 34131.55 | 15732    |
| NONOXIPENT-PWY: pentose phosphate patl         | 14297.79 | 20615.91 | 19520.53 | 18625.25 | 17695.28 | 20483.57 | 44553.44 | 43342.35 | 68223.12 | 44908.41 | 162560.8 | 186417   |
| PWY-4984: urea cycle                           | 13729.13 | 15409.41 | 11449.61 | 10829.52 | 9930.477 | 16610.68 | 7254.835 | 1086.371 | 5382.222 | 591.2103 | 377.7763 | 0        |
| NAGLIPASYN-PWY: lipid IVA biosynthesis (E      | 13438.14 | 12209.23 | 7704.658 | 13024.82 | 23478.9  | 18714.67 | 20183.54 | 1738.162 | 28238.62 | 5718.005 | 51299.56 | 60370.34 |
| PWY-8073: lipid IVA biosynthesis (P. putida)   | 13438.14 | 12209.23 | 7704.658 | 13024.82 | 23478.9  | 18714.67 | 20183.54 | 1738.162 | 28238.62 | 5718.005 | 51299.56 | 60370.34 |
| PWY-621: sucrose degradation III (sucrose in   | 12591.97 | 13593.45 | 14438.98 | 11420.52 | 8388.811 | 7714.682 | 22120.55 | 12462.6  | 29868.85 | 16923    | 49027.83 | 42782.91 |
| PWY-6902: chitin degradation II (Vibrio)       | 12289.24 | 9898.697 | 8811.848 | 10317.55 | 15715.05 | 13549.32 | 1438.006 | 550.0515 | 2636.429 | 3549.605 | 34883.15 | 51912.46 |
| PWY-6317: D-galactose degradation I (Leloir    | 12263.33 | 14196.28 | 18103.34 | 7955.698 | 6022.505 | 13648.96 | 23750.82 | 22480.09 | 31610.75 | 23246.04 | 64034.15 | 78794.75 |
| PWY-2941: L-lysine biosynthesis II             | 12238.43 | 15704.71 | 15623.2  | 15943.05 | 25322.25 | 22001.4  | 13641.08 | 17491.76 | 15422.85 | 15534.32 | 100.9189 | 1859.283 |
| PWY-7111: pyruvate fermentation to isobutan    | 11589.53 | 20681.3  | 16904.15 | 19403.13 | 20286.72 | 20734.87 | 42044.61 | 28686.97 | 64979.87 | 34561.27 | 98128.36 | 121647.6 |
| HSERMETANA-PWY: L-methionine biosynthe         | 11561.9  | 19276.08 | 14172.81 | 14200.48 | 19774.35 | 13697.82 | 25111.21 | 14093.9  | 21986.47 | 15085.84 | 568.818  | 539.9102 |
| POLYISOPRENSYN-PWY: polyisoprenoid bic         | 11075.84 | 12808    | 11597.32 | 13198.14 | 7359.683 | 8860.929 | 15498.47 | 2823.875 | 21366.26 | 6067.261 | 46940.18 | 50663.46 |
| COLANSYN-PWY: colanic acid building block      | 11066.5  | 14747.71 | 11760.93 | 12037.42 | 14289.85 | 14893.98 | 21988.89 | 13314.05 | 28310.87 | 12821.88 | 2021.694 | 24622.31 |
| PWY-6731: starch degradation III               | 10517.89 | 12386.89 | 9438.658 | 9315.48  | 18216.51 | 12323.3  | 17454.12 | 7760.814 | 21001.63 | 5874.761 | 47450.93 | 53407    |
| GLYCOCAT-PWY: glycogen degradation I           | 10399.59 | 7760.504 | 4370.169 | 1990.579 | 6427.742 | 11400.65 | 6170.962 | 1440.454 | 9700.5   | 4952.43  | 23050.09 | 45654.37 |
| COBALSYN-PWY: superpathway of adenosyl         | 10378.68 | 9952.177 | 10448.16 | 9670.84  | 15320.9  | 13910.4  | 13692.35 | 8111.072 | 13391.2  | 8842.322 | 65982.81 | 64615.43 |
| BIOTIN-BIOSYNTHESIS-PWY: biotin biosyntl       | 10102.17 | 16440.63 | 13753.96 | 16373.68 | 16368.97 | 16186.81 | 29573.81 | 3598.898 | 30077.81 | 7713.959 | 49728.65 | 62090.88 |
| FASYN-ELONG-PWY: fatty acid elongation --      | 9947.333 | 16784.41 | 14121.85 | 16880.4  | 14899.17 | 15089.51 | 31684.48 | 3720.055 | 34507.04 | 11588.24 | 53303.31 | 65692.72 |
| PWY-7345: superpathway of anaerobic sucro      | 9520.883 | 16084.38 | 12169.65 | 15787.84 | 16805.84 | 14005.79 | 27998.3  | 6292.569 | 40513.56 | 13870.72 | 59870.29 | 79071.93 |
| PWY-6519: 8-amino-7-oxononanoate biosyntl      | 9316.983 | 15643.67 | 13148.72 | 15728.73 | 15064.88 | 15191.8  | 29577.99 | 3201.248 | 29362.44 | 7272.736 | 49155.22 | 61312.63 |
| PWY-5384: sucrose degradation IV (sucrose      | 9312.316 | 12462.08 | 12711.42 | 11199.74 | 8432.894 | 6972.97  | 19246.94 | 13102.64 | 28374.09 | 18291.74 | 55742.76 | 73785.88 |
| PWY-6527: stachyose degradation                | 9238.344 | 11924.08 | 15503.3  | 8124.191 | 6265.316 | 10650.82 | 25394.69 | 21891.76 | 39049.76 | 19033.48 | 65203.87 | 74555.68 |
| PWY-7664: oleate biosynthesis IV (anaerobic    | 9106.16  | 15759.98 | 13119.98 | 15941.12 | 13612.09 | 14014.2  | 31131.52 | 3433.642 | 32771.97 | 11235.17 | 52077.07 | 63616.9  |
| GLUCONEO-PWY: gluconeogenesis I                | 9073.772 | 17935.29 | 13856.43 | 17369.2  | 25498.51 | 18170.79 | 29446.5  | 6539.793 | 36114.06 | 15275.74 | 61802.05 | 75113.42 |
| UDPNAGSYN-PWY: UDP-N-acetyl-D-glucosæ          | 8992.15  | 12140.53 | 9394.153 | 6942.146 | 7442.777 | 13866.42 | 21793.07 | 15752.52 | 42227.9  | 14955.8  | 63435.88 | 83692.73 |
| PWY-7323: superpathway of GDP-mannose-(        | 8973.942 | 11296.04 | 10550.32 | 10526.26 | 11347.18 | 8956.473 | 19748.66 | 7452.25  | 22453.27 | 6545.315 | 0        | 2029.674 |
| PWY0-162: superpathway of pyrimidine ribonl    | 8960.812 | 18149.92 | 11118.01 | 17854.27 | 20639.77 | 11938.34 | 28847.92 | 2691.79  | 31571.84 | 10605.7  | 34540.6  | 43948.79 |
| PWY0-1261: anhydromuropeptides recycling       | 8899.196 | 11014.1  | 6697.129 | 4455.155 | 5759.783 | 13749.72 | 16302.05 | 8231.566 | 24781.95 | 7340.05  | 34225.47 | 45973.19 |
| PWY-6936: seleno-amino acid biosynthesis (r    | 8862.349 | 16920.3  | 11567.96 | 11735.21 | 16635.61 | 11042.06 | 25190.14 | 13211.62 | 41121.79 | 17825.58 | 71764.17 | 88812.03 |
| P41-PWY: pyruvate fermentation to acetate a    | 8605.045 | 10505.14 | 12693.92 | 3413.883 | 2476.513 | 7160.659 | 9090.983 | 12567.61 | 17347.02 | 18409.73 | 3050.757 | 9230.119 |
| PWY-5100: pyruvate fermentation to acetate :   | 8605.045 | 10505.14 | 12693.92 | 5153.266 | 4634.102 | 7160.659 | 13081.02 | 12812.07 | 20440.39 | 18409.73 | 33548.72 | 40932.25 |
| PWY-5989: stearate biosynthesis II (bacteria : | 8210.431 | 14627.36 | 11896.08 | 15134.78 | 12124.47 | 12629.38 | 29208.57 | 2975.815 | 28216.15 | 9971.164 | 41737.98 | 51306.55 |
| PWY0-862: (5Z)-dodecenoate biosynthesis I      | 8183.472 | 14573.96 | 11986.18 | 14840.11 | 12206.17 | 12798.16 | 30423.57 | 3113.976 | 30712.91 | 10796.57 | 58272.29 | 69127.44 |

|                                                |          |          |          |          |          |          |          |          |          |          |          |          |
|------------------------------------------------|----------|----------|----------|----------|----------|----------|----------|----------|----------|----------|----------|----------|
| PWY-5188: tetrapyrrole biosynthesis I (from g  | 8155.568 | 7763.042 | 8425.323 | 5280.874 | 6126.944 | 9849.11  | 15132.21 | 6046.402 | 28712.44 | 9189.04  | 56552.52 | 67363.16 |
| PWY-6282: palmitoleate biosynthesis I (from    | 8154.131 | 14482.34 | 11910.78 | 14954.26 | 12269.84 | 12778.16 | 30163.37 | 3033.695 | 30757.8  | 10418.58 | 45106.52 | 55544.69 |
| PWY-6859: all-trans-farnesol biosynthesis      | 8044.617 | 9445.605 | 8449.47  | 10469.52 | 4359.318 | 6435.49  | 11347.11 | 289.5498 | 11699.45 | 1864.085 | 1808.65  | 5440.358 |
| PWY-7328: superpathway of UDP-glucose-de       | 7819.664 | 12159.83 | 8117.609 | 10033.35 | 9906.239 | 11010.82 | 18715.2  | 20731.82 | 23788.05 | 20282.59 | 50.19118 | 16777.57 |
| GLUCOSE1PMETAB-PWY: glucose and gluc           | 7528.647 | 10835.33 | 11171.72 | 11157.1  | 11537.81 | 7613.283 | 17825.41 | 19961.45 | 25135.09 | 21032.17 | 54697.87 | 82113.03 |
| PWY-6906: chitin derivatives degradation       | 7504.508 | 9110.324 | 5823.835 | 355.3429 | 12549.83 | 16092.16 | 2638.276 | 1296.824 | 2500.937 | 1001.52  | 0        | 0        |
| PWY-6823: molybdopterin biosynthesis           | 7403.132 | 8835.246 | 7566.941 | 3699.777 | 2614.866 | 8714.546 | 11609.84 | 14745.98 | 17691.45 | 16088.78 | 29969.26 | 32746.38 |
| PWY-7456: &beta;-(1,4)-mannan degradation      | 7382.851 | 9355.127 | 7127.886 | 7891.143 | 8438.62  | 7156.411 | 14535.27 | 2751.186 | 10390.35 | 837.2547 | 0        | 0        |
| FUC-RHAMCAT-PWY: superpathway of fuco:         | 7315.17  | 7199.638 | 8806.036 | 5844.59  | 4707.446 | 9436.901 | 19038.87 | 2887.166 | 25892.41 | 6886.007 | 49774.36 | 64039.84 |
| PWY-7197: pyrimidine deoxyribonucleotide pl    | 7042.824 | 11844.77 | 9212.039 | 5696.688 | 4910.696 | 11049.73 | 13679.95 | 8086.378 | 23880.81 | 7506.738 | 30075.73 | 35385.44 |
| PWY-6628: superpathway of L-phenylalanine      | 6951.925 | 11516.06 | 8596.245 | 3844.352 | 3851.773 | 13769.56 | 16658.44 | 13357.52 | 24131.65 | 13708.57 | 31846.86 | 50080.8  |
| GLYCOLYSIS-E-D: superpathway of glycolysi      | 6654.493 | 14084.36 | 9359.585 | 13351.79 | 16092.21 | 10005.08 | 21765.09 | 4137.881 | 28637.74 | 11864.51 | 58909.26 | 75160.99 |
| PWY-6608: guanosine nucleotides degradatic     | 6331.58  | 8072.763 | 10697.68 | 12813.26 | 15997.16 | 9093.364 | 42528.25 | 14160.56 | 62503.95 | 18029.18 | 89510.87 | 115178   |
| GLUCUROCAT-PWY: superpathway of &beta;         | 6301.694 | 6774.226 | 8613.477 | 6615.395 | 11440.21 | 8827.703 | 14959.28 | 4292.834 | 17055.94 | 8417.019 | 33601.31 | 51493.36 |
| PWY-5971: palmitate biosynthesis (type II fatt | 6054.164 | 15266.7  | 7288.696 | 16664.49 | 15368.52 | 14456.31 | 31119.61 | 3856.262 | 33547.66 | 10505.83 | 51341.78 | 63316.49 |
| PWY-7184: pyrimidine deoxyribonucleotides c    | 5841.196 | 3341.615 | 9476.953 | 5770.88  | 4440.886 | 6299.057 | 16833.4  | 5480.117 | 26778.96 | 8516.322 | 37449.16 | 48380.12 |
| PWY-7210: pyrimidine deoxyribonucleotides k    | 5591.814 | 3531.119 | 8825.97  | 992.8898 | 447.5999 | 2663.175 | 12440.62 | 2003.426 | 17444.59 | 7038.932 | 3073.171 | 6100.304 |
| PWY-8004: Entner-Doudoroff pathway I           | 5557.623 | 13237.51 | 8555.152 | 12957.41 | 15273.62 | 8624.6   | 19396.43 | 3394.137 | 23894.24 | 12302.33 | 56717.49 | 70952.14 |
| PWY-6545: pyrimidine deoxyribonucleotides c    | 5520.012 | 3125.16  | 8720.5   | 1564.664 | 2322.994 | 5477.988 | 12260.6  | 4931.542 | 23085.73 | 6474.166 | 2788.882 | 5605.858 |
| PWY-7198: pyrimidine deoxyribonucleotides c    | 5098.185 | 6766.91  | 8009.708 | 933.8362 | 597.1274 | 1993.049 | 11226.62 | 10533.69 | 14909.24 | 10407.99 | 2195.856 | 4446.182 |
| PWY-7242: D-fructuronate degradation           | 4706.014 | 5284.887 | 6638.197 | 5548.432 | 10269    | 6952.005 | 13355.91 | 3205.791 | 15272.63 | 9779.357 | 30687.64 | 56793.43 |
| GLCMANNANAUT-PWY: superpathway of N-           | 4614.147 | 9483.548 | 7286.869 | 10569.94 | 7967.142 | 10651.96 | 29640.89 | 17998.01 | 36375.55 | 15142.97 | 63517.18 | 73264.96 |
| PWY-6305: superpathway of putrescine biosy     | 4611.503 | 6677.583 | 8190.991 | 10441.37 | 11586.51 | 12132.84 | 12830.94 | 1589.623 | 18704.44 | 7682.741 | 61322.56 | 93495.52 |
| PWY-6353: purine nucleotides degradation II    | 4590.976 | 9526.136 | 4359.287 | 12126.94 | 11015.85 | 11081.77 | 27228.32 | 14454.3  | 42059.22 | 19553.39 | 80267.47 | 98096.35 |
| PWY-6168: flavin biosynthesis III (fungi)      | 4352.019 | 8989.307 | 7311.692 | 15636.63 | 10482.5  | 16798.99 | 16314.7  | 2514.858 | 22623.47 | 6525.919 | 5321.44  | 26786.31 |
| PWY0-1479: tRNA processing                     | 4346.99  | 5519.788 | 5912.139 | 6626.125 | 7096.792 | 6442.499 | 18971.38 | 1896.546 | 28320.32 | 8705.351 | 40807.3  | 47539.85 |
| PWY66-399: gluconeogenesis III                 | 4203.683 | 5114.102 | 4212.338 | 1078.268 | 583.0247 | 1469.508 | 6099.613 | 1626.544 | 5050.118 | 5375.58  | 1096.546 | 0        |
| FUCCAT-PWY: fucose degradation                 | 4124.715 | 4324.611 | 5093.073 | 3557.422 | 2597.22  | 5940.294 | 17093.07 | 1481.611 | 24945.69 | 4386.661 | 47406.83 | 61450.54 |
| PWY0-1241: ADP-L-glycero-&beta;-D-manno        | 4104.34  | 5714.003 | 3659.791 | 1911.23  | 4794.478 | 7266.845 | 6352.765 | 2835.737 | 18068.58 | 3919.419 | 28079.22 | 34873.71 |
| PWY-7234: inosine-5 -phosphate biosynthesi:    | 4094.547 | 10236.97 | 7249.385 | 8799.981 | 9451.24  | 7642.715 | 24144.58 | 6216.237 | 28903.86 | 9669.209 | 31432.62 | 39306.63 |
| PWY-I9: L-cysteine biosynthesis VI (from L-m   | 3934.988 | 8253.476 | 8259.274 | 9714.729 | 11665.38 | 7559.172 | 24765.51 | 8697.87  | 30206.89 | 14809.81 | 39323.11 | 56534.45 |
| P164-PWY: purine nucleobases degradation l     | 3511.688 | 5227.212 | 7460.564 | 5221.136 | 5419.877 | 7016.408 | 7650.844 | 15409.77 | 18252.16 | 17815.59 | 191.004  | 2696.08  |
| PWY-6470: peptidoglycan biosynthesis V (&b     | 3481.724 | 9390.506 | 4367.272 | 2038.121 | 3730.678 | 3966.197 | 3143.495 | 5724.534 | 3644.063 | 1589.868 | 0        | 1387.954 |
| PWY-7211: superpathway of pyrimidine deoxy     | 3468.74  | 3970.159 | 5469.442 | 1688.833 | 782.7419 | 3897.454 | 16945.81 | 2502.545 | 22248.61 | 8846.99  | 5185.021 | 10035.01 |
| PWY0-1477: ethanolamine utilization            | 3358.349 | 5756.187 | 6492.615 | 6311.475 | 5775.343 | 6535.721 | 25167.33 | 16165.54 | 46949.11 | 22216.27 | 104471.4 | 129509.8 |

|                                                |          |          |          |          |          |          |          |          |          |          |          |          |
|------------------------------------------------|----------|----------|----------|----------|----------|----------|----------|----------|----------|----------|----------|----------|
| PWY-702: L-methionine biosynthesis II          | 3158.495 | 6299.186 | 5353.165 | 4716.919 | 5277.177 | 4827.569 | 15937.83 | 5813.361 | 27790.19 | 10338.21 | 65037.48 | 64760.41 |
| GALACT-GLUCUROCAT-PWY: superpathwa             | 3152.94  | 4722.014 | 4290.465 | 6910.663 | 8395.76  | 6802.009 | 12227.41 | 3358.635 | 16923.13 | 5840.267 | 29033.76 | 39170.39 |
| PWY-6630: superpathway of L-tyrosine biosy     | 3132.579 | 6366.793 | 5381.767 | 2974.361 | 2037.584 | 4483.705 | 9422.791 | 12280.38 | 17824.68 | 13624.49 | 19390.27 | 26137.87 |
| PWY-6292: superpathway of L-cysteine biosy     | 2974.093 | 3205.84  | 4471.884 | 30.59035 | 93.34084 | 237.13   | 3249.486 | 232.5332 | 0        | 3079.385 | 114.5396 | 3961.124 |
| GALACTUROCAT-PWY: D-galacturonate de           | 2952.91  | 4918.694 | 4264.656 | 7934.842 | 11124.33 | 8232.934 | 14231.31 | 6739.279 | 16306.44 | 9598.674 | 33815.3  | 56179.47 |
| DAPLYSINESYN-PWY: L-lysine biosynthesis        | 2927.172 | 8747.064 | 5929.825 | 9859.787 | 10806.78 | 7519.415 | 19862.13 | 1602.357 | 29846.1  | 12442.22 | 37743.67 | 57877.22 |
| PWY-6590: superpathway of Clostridium acet     | 2888.393 | 3104.012 | 1734.165 | 1050.262 | 743.7644 | 1290.473 | 1014.115 | 3769.91  | 1847.336 | 1161.251 | 0        | 0        |
| PWY-4041: &gamma;-glutamyl cycle               | 2828.976 | 6337.247 | 5737.907 | 9798.144 | 9153.472 | 9396.421 | 24606.53 | 5748.71  | 29973.55 | 9228.279 | 79342.62 | 96224.97 |
| PWY-5505: L-glutamate and L-glutamine bios     | 2816.174 | 4105.433 | 4184.808 | 795.2417 | 482.8011 | 1570.057 | 5566.336 | 1193.09  | 5362.261 | 1544.703 | 0        | 0        |
| PWY0-1061: superpathway of L-alanine biosy     | 2786.182 | 3445.343 | 6184.609 | 3405.016 | 1754.62  | 2700.722 | 10499.12 | 4820.755 | 15677.47 | 6646.887 | 23254.25 | 53426.63 |
| PWY-6507: 4-deoxy-L-threo-hex-4-enopyran       | 2726.233 | 4245.505 | 5569.643 | 6829.35  | 10318.69 | 6201.792 | 13183.03 | 6242.155 | 15339.05 | 10284.53 | 31304.45 | 55835.28 |
| P441-PWY: superpathway of N-acetylneuram       | 2664.764 | 8965.78  | 7252.953 | 11895.7  | 12434.22 | 11222.67 | 28340.92 | 11827.95 | 38730.01 | 15641    | 64326.93 | 78972.33 |
| PWY66-409: superpathway of purine nucleoti     | 2601.092 | 10590.99 | 7506.231 | 9531.037 | 9141.391 | 6899.016 | 22897.76 | 15814.12 | 30277.15 | 19300.53 | 45634.84 | 53959.64 |
| PWY-5676: acetyl-CoA fermentation to butan     | 2577.194 | 4565.789 | 1247.414 | 3696.529 | 2424.202 | 5347.883 | 7486.444 | 6377.814 | 9608.829 | 7217.091 | 52.61457 | 0        |
| SALVADEHYPOX-PWY: adenosine nucleotid          | 2538.944 | 6184.543 | 2244.512 | 11450.46 | 14151.54 | 7869.051 | 40663.65 | 12822.53 | 61589.11 | 17222.71 | 99401.65 | 125058.9 |
| PWY-6606: guanosine nucleotides degradatic     | 2511.714 | 5304.873 | 2443.607 | 6863.819 | 5275.416 | 6235.916 | 15603.56 | 10492.26 | 26946.42 | 13775.79 | 77949.77 | 89696.79 |
| PWY-7383: anaerobic energy metabolism (in      | 2458.925 | 2540.122 | 2878.641 | 586.5501 | 334.8548 | 842.0193 | 4030.747 | 1200.75  | 3253.259 | 5124.4   | 1539.685 | 0        |
| PWY-5497: purine nucleobases degradation I     | 2354.556 | 5314.817 | 4366.5   | 4288.862 | 9761.678 | 8616.213 | 8182.324 | 2185.344 | 16952.15 | 7469.197 | 34892.76 | 27688.14 |
| PWY-6895: superpathway of thiamine diphos      | 2337.276 | 7797.46  | 5700.283 | 9783.393 | 11374.35 | 12428.78 | 24251.08 | 3030.829 | 24503.8  | 8104.037 | 35656.27 | 42551.16 |
| CENTFERM-PWY: pyruvate fermentation to l       | 2331.863 | 2427.675 | 1341.172 | 799.5543 | 560.7136 | 992.8029 | 767.183  | 3052.932 | 1404.025 | 884.1143 | 0        | 0        |
| FERMENTATION-PWY: mixed acid fermenta          | 2190.416 | 4784.02  | 6611.494 | 7987.02  | 8044.278 | 9562.253 | 15805.72 | 1281.206 | 21527.8  | 9261.341 | 37779.39 | 73408.54 |
| GLUDEG-I-PWY: GABA shunt                       | 2038.036 | 3604.868 | 3933.28  | 5490.435 | 6343.413 | 2544.4   | 16442.34 | 1131.258 | 10923.21 | 961.5587 | 15843.65 | 19838.57 |
| PWY-5022: 4-aminobutanoate degradation V       | 2032.798 | 3560.61  | 3864.943 | 5313.257 | 6382.709 | 2541.321 | 15379.99 | 2978.679 | 11769.14 | 3135.38  | 0        | 0        |
| PWY-5005: biotin biosynthesis II               | 1915.85  | 1929.925 | 1651.374 | 352.5114 | 1115.796 | 5865.57  | 2422.613 | 2501.745 | 14091.16 | 846.1734 | 574.4051 | 0        |
| ARG+POLYAMINE-SYN: superpathway of arg         | 1813.359 | 6793.669 | 7641.529 | 8242.115 | 7407.194 | 11322.09 | 21231.27 | 6424.117 | 34870.18 | 16832.22 | 60851.97 | 70993.48 |
| PWY-6969: TCA cycle V (2-oxoglutarate synt     | 1809.436 | 4733.79  | 4244.45  | 5196.977 | 4695.078 | 6215.164 | 10729.96 | 678.2487 | 14880.53 | 5880.155 | 26335.07 | 54102.15 |
| PWY-7356: thiamine diphosphate salvage IV      | 1697.755 | 3425.244 | 3031.759 | 119.9089 | 214.4275 | 475.4966 | 1110.844 | 1209.678 | 2239.908 | 4736.754 | 17.34893 | 10183.48 |
| P42-PWY: incomplete reductive TCA cycle        | 1690.498 | 4283.292 | 1670.975 | 2463.157 | 2209.572 | 2353.885 | 3768.214 | 302.7727 | 6120.45  | 3093.574 | 828.5411 | 525.1456 |
| PWY-5136: fatty acid &beta;-oxidation II (plan | 1674.748 | 5080.033 | 3460.689 | 7689.384 | 9952.297 | 8767.208 | 25105.39 | 2766.256 | 40181.73 | 9069.36  | 132521.4 | 150568.9 |
| PWY-7883: anhydromuropeptides recycling II     | 1665.122 | 3353.806 | 2533.175 | 1414.082 | 2355.474 | 2508.849 | 6054.786 | 368.0208 | 10328.01 | 3585.219 | 10391.08 | 12986.3  |
| PWY-8131: 5 -deoxyadenosine degradation II     | 1639.601 | 3698.653 | 2143.359 | 1187.38  | 349.7165 | 4327.373 | 1242.519 | 16293.54 | 5065.844 | 17694.86 | 22459.83 | 9901.255 |
| PWY-7115: C4 photosynthetic carbon assimil     | 1614.89  | 3636.513 | 5072.104 | 2367.628 | 1979.487 | 3135.037 | 11858.88 | 2666.012 | 16117.23 | 6422.028 | 25276.39 | 48387.78 |
| PWY-5838: superpathway of menaquinol-8 bi      | 1603.4   | 8726.819 | 9568.464 | 8758.734 | 7993.437 | 8373.621 | 19039.15 | 1725.624 | 22550.33 | 4637.362 | 52483.33 | 56799.27 |
| PWY-7117: C4 photosynthetic carbon assimil     | 1593.924 | 7329.72  | 4662.38  | 8702.536 | 9496.951 | 6624.333 | 20766.58 | 1619.537 | 30486.08 | 9306.877 | 76886.58 | 98301.62 |
| HEMESYN2-PWY: heme b biosynthesis II (ox       | 1513.859 | 3995.307 | 2256.726 | 3126.268 | 3876.3   | 4129.462 | 14596.64 | 3889.658 | 22065.73 | 7476.519 | 42303.7  | 52761.05 |



|                                               |          |          |          |          |          |          |          |          |          |          |          |          |
|-----------------------------------------------|----------|----------|----------|----------|----------|----------|----------|----------|----------|----------|----------|----------|
| PWY-5845: superpathway of menaquinol-9 bi     | 1423.779 | 7517.572 | 5175.848 | 8295.836 | 7997.105 | 8190.49  | 14666.3  | 1307.837 | 18261.46 | 4380.552 | 47124.93 | 53762.72 |
| PWY-5897: superpathway of menaquinol-11 b     | 1415.564 | 8028.188 | 9043.756 | 8105.206 | 7218.733 | 7603.612 | 18497.92 | 1808.895 | 22007.49 | 4701.566 | 50488.53 | 56018.74 |
| PWY-5898: superpathway of menaquinol-12 b     | 1415.564 | 8028.188 | 9043.756 | 8105.206 | 7218.733 | 7603.612 | 18497.92 | 1808.895 | 22007.49 | 4701.566 | 50488.53 | 56018.74 |
| PWY-5899: superpathway of menaquinol-13 b     | 1415.564 | 8028.188 | 9043.756 | 8105.206 | 7218.733 | 7603.612 | 18497.92 | 1808.895 | 22007.49 | 4701.566 | 50488.53 | 56018.74 |
| PWY-6992: 1,5-anhydrofructose degradation     | 1377.945 | 4889.925 | 840.9259 | 5337.675 | 5707.53  | 1845.599 | 5276.173 | 35.79685 | 5928.651 | 381.1948 | 16499.34 | 20858.27 |
| PWY-7013: (S)-propane-1,2-diol degradation    | 1359.212 | 1316.656 | 4774.276 | 4384.383 | 3853.428 | 881.5941 | 267.5935 | 101.7664 | 0        | 12099.33 | 0        | 24663.42 |
| PWY-241: C4 photosynthetic carbon assimila    | 1330.597 | 5967.811 | 3998.695 | 6734.325 | 8421.175 | 5709.669 | 16537.78 | 1575.794 | 19681.79 | 8856.608 | 98.35489 | 257.3362 |
| PWY-6549: L-glutamine biosynthesis III        | 1316.875 | 3325.111 | 3239.476 | 1344.843 | 869.3633 | 2475.482 | 5609.552 | 1973.122 | 7791.285 | 7647.256 | 0        | 0        |
| PWY-5840: superpathway of menaquinol-7 bi     | 1278.173 | 3962.57  | 5175.848 | 4909.913 | 4302.13  | 5644.599 | 14666.3  | 1307.837 | 18261.46 | 4380.552 | 47124.93 | 53762.72 |
| PWY0-1297: superpathway of purine deoxyrit    | 1271.627 | 5148.002 | 4894.694 | 6953.944 | 7172.872 | 8274.695 | 27603.81 | 14705.93 | 42492.19 | 25908.7  | 48617.21 | 64704.73 |
| PWY-5690: TCA cycle II (plants and fungi)     | 1192.227 | 2315.56  | 1888.476 | 477.409  | 224.6043 | 169.9868 | 602.3524 | 659.2387 | 730.4059 | 1555.47  | 0        | 0        |
| PWY66-391: fatty acid &beta;-oxidation VI (m  | 1169.238 | 1636.092 | 189.8142 | 1177.52  | 415.3207 | 1955.691 | 1849.232 | 931.3689 | 1745.719 | 697.2608 | 177.8706 | 513.2662 |
| METH-ACETATE-PWY: methanogenesis fror         | 1110.502 | 860.8157 | 1109.79  | 95.27877 | 308.6162 | 784.0494 | 905.2196 | 4905.295 | 3066.651 | 0        | 0        | 0        |
| PWY-5861: superpathway of demethylmena        | 1096.737 | 6634.919 | 7530.31  | 6613.462 | 5737.047 | 6172.492 | 16224.23 | 1666.825 | 20133.14 | 4248.744 | 51025.25 | 53908.31 |
| PWY-5345: superpathway of L-methionine bic    | 1085.019 | 9823.949 | 10367.65 | 12928.93 | 14289.46 | 9598.795 | 19470.19 | 4663.802 | 25580.62 | 9495.284 | 2039.715 | 1946.303 |
| PWY-7761: NAD salvage pathway II (PNC IV      | 1075.603 | 5621.65  | 3389.179 | 4420.935 | 5032.834 | 7460.471 | 10312.69 | 10234.17 | 17620.16 | 9198.228 | 19039.37 | 13160.54 |
| PWY4LZ-257: superpathway of fermentation      | 1030.734 | 4183.678 | 3789.692 | 5990.725 | 5211.153 | 6203.966 | 17788.99 | 8652.881 | 28996.1  | 10116.48 | 56191.78 | 71139.42 |
| PWY-5862: superpathway of demethylmena        | 971.0453 | 5606.44  | 3761.671 | 6220.347 | 5739.881 | 6023.575 | 11747.24 | 1139.44  | 15315.88 | 3931.953 | 43767.67 | 49896.22 |
| POLYAMSYN-PWY: superpathway of polyam         | 951.6606 | 4090.491 | 4707.9   | 6630.812 | 5724.364 | 8218.747 | 17619.14 | 3716.328 | 29246.03 | 12053.28 | 60807.59 | 74803.37 |
| PWY-6807: xyloglucan degradation II (exoglu   | 940.2578 | 775.3045 | 1165.957 | 0        | 0        | 0        | 0        | 0        | 123.598  | 0        | 0        | 0        |
| PWY-622: starch biosynthesis                  | 913.4584 | 1902.801 | 417.0152 | 0        | 0        | 0        | 0        | 0        | 0        | 0        | 0        | 0        |
| SULFATE-CYS-PWY: superpathway of sulfat       | 891.1226 | 8304.838 | 9056.338 | 12050.35 | 13726.98 | 8905.006 | 26447.58 | 4324.627 | 33687.69 | 7856.532 | 60675.38 | 73869.87 |
| HEME-BIOSYNTHESIS-II: heme b biosynthe        | 882.6747 | 3497.462 | 1348.549 | 4949.692 | 5190.287 | 3136.488 | 12398.59 | 837.3552 | 19512.58 | 4473.308 | 36339.65 | 45236.31 |
| HEXITOLDEGSUPER-PWY: superpathway o           | 840.2646 | 2870.514 | 432.6503 | 6459.773 | 6962.249 | 6517.753 | 17967.28 | 3881.941 | 29161.62 | 4457.316 | 51078.85 | 29164.15 |
| P161-PWY: acetylene degradation (anaerobic    | 817.9038 | 3467.341 | 3070.841 | 5549.595 | 5775.343 | 5576.225 | 23185.76 | 10890.86 | 37944.47 | 16726.75 | 60524.69 | 92850.22 |
| PWY0-1298: superpathway of pyrimidine deo     | 796.687  | 3803.214 | 3552.208 | 5452.969 | 5462.148 | 5898.819 | 22898.43 | 12738.62 | 35831.89 | 17093.86 | 45795.86 | 59326.75 |
| GOLPDLCAT-PWY: superpathway of glycerol       | 788.036  | 1116.482 | 2194.813 | 1011.875 | 137.8457 | 1428.05  | 315.2455 | 1884.785 | 3453.618 | 5547.66  | 12.96219 | 8678.147 |
| PWY-6572: chondroitin sulfate degradation I   | 748.7331 | 927.0338 | 1945.104 | 2153.709 | 2490.825 | 1088.243 | 282.2276 | 194.4527 | 700.0893 | 0        | 0        | 0        |
| PWY-5913: partial TCA cycle (obligate autotr  | 748.5829 | 3343.063 | 2563.064 | 5650.497 | 5589.082 | 3748.81  | 16203.22 | 925.416  | 25836.06 | 7535.422 | 86050.79 | 96358.07 |
| PWY-5918: superpathway of heme b biosynth     | 726.8857 | 3291.773 | 1868     | 4128.629 | 4993.227 | 3650.257 | 12808.59 | 1240.052 | 22154.76 | 4888.817 | 45920.74 | 55385.4  |
| PWY-1861: formaldehyde assimilation II (assi  | 716.1515 | 1631.009 | 2755.104 | 637.0054 | 77.94249 | 2936.361 | 1932.055 | 4696.653 | 8261.262 | 10593.73 | 0        | 3648.873 |
| PWY-6595: superpathway of guanosine nucle     | 700.9965 | 2390.481 | 842.312  | 498.1847 | 243.3196 | 322.5721 | 407.6752 | 9111.592 | 1547.934 | 10662.74 | 19.51644 | 567.2018 |
| PWY-6607: guanosine nucleotides degradatic    | 697.6592 | 2476.86  | 817.6438 | 504.0699 | 245.8944 | 324.3697 | 410.0156 | 9084.841 | 1565.477 | 10853.08 | 19.51723 | 567.7567 |
| P461-PWY: hexitol fermentation to lactate, fo | 697.5638 | 3816.045 | 3016.733 | 7530.991 | 8533.906 | 8356.856 | 15454.36 | 5177.833 | 28426.41 | 9029.12  | 91619.8  | 122588.1 |
| PWY-5130: 2-oxobutanoate degradation I        | 689.8597 | 2219.773 | 1024.29  | 2849.864 | 305.7611 | 2120.723 | 1616.771 | 1285.405 | 589.5136 | 633.421  | 0        | 0        |

|                                              |          |          |          |          |          |          |          |          |          |          |          |          |
|----------------------------------------------|----------|----------|----------|----------|----------|----------|----------|----------|----------|----------|----------|----------|
| PWY-6285: superpathway of fatty acids biosy  | 671.2693 | 5486.364 | 1227.688 | 8414.865 | 7621.05  | 5770.51  | 21732.05 | 1965.509 | 26534.08 | 5195.393 | 45581.77 | 56500.91 |
| P124-PWY: Bifidobacterium shunt              | 668.0308 | 2040.351 | 214.224  | 0        | 88.61258 | 721.28   | 0        | 0        | 0        | 187.192  | 0        | 0        |
| PWY1ZNC-1: assimilatory sulfate reduction I\ | 667.2692 | 1818.86  | 2658.408 | 3902.563 | 3942.708 | 1790.286 | 10912.6  | 449.269  | 15917.2  | 4164.246 | 45219.32 | 52275.74 |
| PWY0-781: aspartate superpathway             | 663.3378 | 4018.567 | 4474.947 | 5913.745 | 6250.548 | 4262.984 | 15120.57 | 1127.966 | 23261.62 | 10422.48 | 36465.45 | 59053.28 |
| PWY-6531: mannitol cycle                     | 645.8117 | 1785.636 | 1870.655 | 2838.673 | 2335.158 | 3764.995 | 9514.24  | 6041.872 | 17693.98 | 6037.273 | 59107.24 | 74524.53 |
| P4-PWY: superpathway of L-lysine, L-threonin | 629.1104 | 3848.74  | 4312.011 | 5736.024 | 6043.37  | 4112.384 | 14877.83 | 1069.528 | 22707.98 | 10074.34 | 45090.86 | 60431.04 |
| TCA: TCA cycle I (prokaryotic)               | 609.9558 | 2938.12  | 4244.45  | 5196.977 | 4695.078 | 6215.164 | 10729.96 | 678.2487 | 15009.33 | 5880.155 | 27960.24 | 57747.37 |
| PWY-5850: superpathway of menaquinol-6 bi    | 601.7126 | 3962.57  | 5175.848 | 4909.913 | 4302.13  | 5644.599 | 14666.3  | 1307.837 | 18261.46 | 4380.552 | 47124.93 | 53762.72 |
| PWY-5896: superpathway of menaquinol-10 k    | 601.7126 | 3962.57  | 5175.848 | 4909.913 | 4302.13  | 5644.599 | 14666.3  | 1307.837 | 18261.46 | 4380.552 | 47124.93 | 53762.72 |
| POLYAMINSYN3-PWY: superpathway of poly       | 598.6967 | 2120.987 | 2824.098 | 0        | 345.1837 | 244.6134 | 1282.234 | 0        | 0        | 216.159  | 0        | 0        |
| GALACTARDEG-PWY: D-galactarate degrad        | 575.1295 | 2423.201 | 1719.448 | 6152.182 | 4620.726 | 5428.081 | 19184.19 | 6375.256 | 31944.84 | 14738.75 | 83419.75 | 117160   |
| GLUCARGALACTSUPER-PWY: superpathw            | 575.1295 | 2423.201 | 1719.448 | 6152.182 | 4620.726 | 5428.081 | 19184.19 | 6375.256 | 31944.84 | 14738.75 | 83419.75 | 117160   |
| PWY-6588: pyruvate fermentation to acetone   | 567.2921 | 1696.834 | 702.6993 | 2582.678 | 2102.311 | 4412.825 | 2217.388 | 5533.713 | 4079.677 | 1882.493 | 356.9714 | 4643.3   |
| LIPASYN-PWY: phospholipases                  | 545.1416 | 1825.96  | 1272.222 | 2329.326 | 2479.826 | 0        | 6726.47  | 367.312  | 12762.34 | 3421.766 | 27588.14 | 41258.48 |
| PWY-7315: dTDP-N-acetylthomosamine bios      | 524.9171 | 950.7635 | 1763.445 | 7639.805 | 1226.491 | 1030.105 | 9355.234 | 477.4707 | 13872.1  | 4564.057 | 25453.39 | 33819.08 |
| PWY-5837: 2-carboxy-1,4-naphthoquinol bios   | 491.5623 | 3390.351 | 4179.241 | 3497.769 | 2751.685 | 3043.908 | 10549.75 | 1886.479 | 13721.99 | 4219.838 | 41915.36 | 45470.81 |
| PPGPPMET-PWY: ppGpp metabolism               | 481.329  | 2272.871 | 1762.419 | 1006.999 | 1165.837 | 597.3591 | 5315.845 | 3157.456 | 10907.56 | 3616.496 | 13591.66 | 17116.57 |
| PWY0-166: superpathway of pyrimidine deoxy   | 472.5363 | 3188.693 | 3719.895 | 5359.958 | 4224.482 | 6459.63  | 15461.93 | 5629.028 | 25009.56 | 8358.094 | 32593.38 | 44248.67 |
| PWY-6478: GDP-D-glycero-&alpha;-D-mannic     | 467.8034 | 731.8268 | 497.4363 | 2009.705 | 1527.987 | 773.2968 | 819.9426 | 79.18058 | 1174.59  | 0        | 0        | 0        |
| FOLSYN-PWY: superpathway of tetrahydrofo     | 440.6484 | 6448.495 | 1151.413 | 2638.461 | 1835.084 | 3164.434 | 12502.07 | 4395.157 | 19623.65 | 7943.255 | 26592.03 | 42813    |
| PWY-6284: superpathway of unsaturated fatty  | 421.3767 | 3197.453 | 636.8253 | 5586.034 | 5101.002 | 3465.227 | 16759.09 | 1242.555 | 21847.84 | 3283.904 | 42606.38 | 52937.5  |
| FAO-PWY: fatty acid &beta;-oxidation I (gene | 420.789  | 2347.48  | 2719.281 | 4682.174 | 5143.763 | 4483.846 | 18285.24 | 1196.193 | 29655.62 | 7502.777 | 91610.8  | 90645.87 |
| PWY-821: superpathway of sulfur amino acid   | 416.9492 | 3975.622 | 4852.936 | 6384.259 | 6726.825 | 3616.017 | 14108.51 | 1310.601 | 14388.18 | 6851.119 | 1105.881 | 1247.145 |
| SO4ASSIM-PWY: assimilatory sulfate reducti   | 410.3583 | 4929.264 | 5599.796 | 8762.994 | 8660.923 | 5804.628 | 29233.69 | 2411.864 | 30524.9  | 5565.949 | 64542.68 | 74914.29 |
| PWY-561: superpathway of glyoxylate cycle a  | 405.9263 | 2000.529 | 2760.549 | 5012.245 | 5024.488 | 4066.616 | 12490.58 | 802.821  | 18191.37 | 6081.187 | 35118.52 | 67213.14 |
| PWY-5860: superpathway of demethylmenaq      | 404.9947 | 2798.173 | 3761.671 | 3503.197 | 2982.259 | 4022.269 | 11747.24 | 1139.44  | 15315.88 | 3931.953 | 43767.67 | 49896.22 |
| GLUCARDEG-PWY: D-glucarate degradation       | 376.1939 | 1501.231 | 1305.296 | 3361.585 | 3076.903 | 2050.576 | 11882.4  | 1415.995 | 20215.08 | 12417.11 | 62405.59 | 77743.03 |
| PWY-5723: Rubisco shunt                      | 371.86   | 3209.329 | 2768.591 | 8556.118 | 6453.645 | 5187.403 | 23040.66 | 1602.996 | 38364.08 | 10166.98 | 68410.34 | 103448.9 |
| PYRIDNUCSAL-PWY: NAD salvage pathway         | 355.3732 | 2458.01  | 1606.426 | 3487.131 | 3798.956 | 3337.926 | 10437.32 | 1276.006 | 18163.39 | 4848.874 | 364.9317 | 0        |
| TCA-GLYOX-BYPASS: superpathway of glyo:      | 350.1634 | 1788.158 | 2729.418 | 4755.752 | 4526.035 | 3650.056 | 11279.52 | 685.7    | 16368.98 | 5621.991 | 31731.41 | 62539.53 |
| PWY-5347: superpathway of L-methionine bic   | 348.3784 | 3553.181 | 3671.195 | 8983.987 | 9825.049 | 4862.486 | 24031.6  | 2127.828 | 37822.01 | 10252.34 | 67281.92 | 87810.13 |
| MET-SAM-PWY: superpathway of S-adenosy       | 347.1391 | 3499.384 | 3590.791 | 8515.22  | 9311.281 | 4695.831 | 22631.52 | 2299.113 | 37902.45 | 10872.99 | 64478    | 82830.5  |
| HEME-BIOSYNTHESIS-II-1: heme b biosynth      | 344.4466 | 1862.456 | 1348.549 | 2934.415 | 3612.48  | 3136.488 | 12398.59 | 1409.831 | 19512.58 | 5192.477 | 37101.99 | 45236.31 |
| ALLANTOINDEG-PWY: superpathway of alla       | 329.5012 | 96.47041 | 750.7185 | 36.65548 | 47.22878 | 17.81526 | 795.8169 | 470.5074 | 244.4553 | 1274     | 133.3009 | 73.69244 |
| GALACTITOLCAT-PWY: galactitol degradatic     | 318.794  | 1083.764 | 129.6965 | 2824.034 | 2851.537 | 2829.154 | 12130.78 | 3269.932 | 20404.05 | 1780.532 | 50478.86 | 11417.8  |

|                                               |          |          |          |          |          |          |          |          |          |          |          |          |
|-----------------------------------------------|----------|----------|----------|----------|----------|----------|----------|----------|----------|----------|----------|----------|
| PWY-5138: fatty acid &beta;-oxidation IV (uns | 308.6213 | 1217.663 | 1658.007 | 1997.476 | 2374.39  | 2258.27  | 8186.514 | 651.5502 | 13657.65 | 4815.785 | 32739.5  | 33553.42 |
| PWY-7254: TCA cycle VII (acetate-producers    | 307.7764 | 2001.316 | 1041.707 | 208.1361 | 0        | 102.9111 | 42.26315 | 0        | 54.75078 | 0        | 0        | 0        |
| GLYOXYLATE-BYPASS: glyoxylate cycle           | 307.2574 | 1471.444 | 1777.621 | 4044.505 | 4457.122 | 3628.964 | 13384.3  | 738.2373 | 20954.95 | 5018.081 | 46770.48 | 65049.54 |
| METSYN-PWY: superpathway of L-homoseri        | 305.2462 | 3147.569 | 3258.84  | 8144.621 | 8833.635 | 4334.096 | 22898.46 | 2048.865 | 37655.27 | 10054.75 | 65603.19 | 84454.02 |
| PWY-6612: superpathway of tetrahydrofolate    | 294.9275 | 4551.938 | 775.1863 | 1812.743 | 1237.365 | 2163.272 | 9407.962 | 3087.849 | 15108.08 | 5962.857 | 21422.48 | 39009.32 |
| PWY-5920: superpathway of heme b biosynt      | 294.3228 | 1883.616 | 946.5685 | 3293.787 | 3597.449 | 2403.234 | 6148.793 | 315.3919 | 4829.512 | 2273.617 | 27329.7  | 28382.14 |
| PWY3O-4107: NAD salvage pathway V (PNC        | 287.8282 | 2082.775 | 1379.523 | 3492.773 | 3737.454 | 2845.699 | 12506.4  | 952.3871 | 20075.58 | 4148.284 | 261.413  | 0        |
| PWY-5675: nitrate reduction V (assimilatory)  | 284.7035 | 2099.57  | 1884.323 | 4750.517 | 4821.122 | 2795.202 | 21310.71 | 1091.601 | 32753.86 | 6931.987 | 70050.89 | 79098.95 |
| PWY-6922: L-N&delta;-acetylornithine biosyn   | 283.648  | 1276.604 | 1403.67  | 1651.748 | 1532.149 | 847.0639 | 482.6939 | 34.22542 | 1703.039 | 584.2638 | 452.2174 | 0        |
| PWY-5677: succinate fermentation to butano    | 261.6202 | 544.2517 | 57.47408 | 203.5764 | 74.69009 | 650.3577 | 467.5062 | 1311.417 | 442.3986 | 667.8299 | 0        | 0        |
| P108-PWY: pyruvate fermentation to propano    | 258.4626 | 3277.097 | 2094.414 | 3209.891 | 3634.708 | 2027.227 | 3842.103 | 473.8089 | 3830.486 | 4279.344 | 472.5269 | 2210.311 |
| RUMP-PWY: formaldehyde oxidation I            | 255.7891 | 787.6037 | 99.20932 | 245.169  | 0        | 36.14041 | 202.9247 | 2094.442 | 37.35418 | 3488.773 | 0        | 0        |
| ORNDEG-PWY: superpathway of ornithine de      | 235.6712 | 1368.267 | 1216.798 | 4979.313 | 4118.036 | 2814.623 | 15098.84 | 837.0815 | 23939.7  | 4964.09  | 126275.6 | 145417.4 |
| PWY-7200: superpathway of pyrimidine deox     | 227.4985 | 539.2295 | 427.6288 | 0        | 0        | 0        | 0        | 0        | 0        | 0        | 0        | 0        |
| PWY-7118: chitin deacetylation                | 220.4601 | 1905.807 | 1541.456 | 3099.553 | 2502.95  | 2694.826 | 14472.07 | 1559.054 | 22598.42 | 6058.873 | 72326.3  | 104373.7 |
| PWY-5104: L-isoleucine biosynthesis IV        | 213.6489 | 2301.933 | 672.0086 | 5246.604 | 4402.694 | 3722.538 | 12584.7  | 1425.841 | 13309.99 | 3394.816 | 0        | 0        |
| PWY0-301: L-ascorbate degradation I (bacter   | 212.1654 | 1572.649 | 1488.8   | 2890.314 | 3870.16  | 2079.246 | 15899.54 | 935.2914 | 27820.36 | 4827.036 | 59160.55 | 72191.44 |
| PWY-5189: tetrapyrrole biosynthesis II (from  | 209.3278 | 1523.131 | 787.3834 | 2916.167 | 3008.877 | 2485.746 | 9711.068 | 883.171  | 17936.22 | 3559.167 | 51431.15 | 58866.47 |
| PROPFERM-PWY: superpathway of L-alanin        | 208.5578 | 381.3639 | 56.44385 | 0        | 0        | 0        | 237.977  | 86.91934 | 512.5202 | 198.9731 | 0        | 0        |
| PWY-8188: L-alanine degradation VI (reducti   | 208.5578 | 381.3639 | 56.44385 | 0        | 0        | 0        | 237.977  | 86.91934 | 512.5202 | 198.9731 | 0        | 0        |
| PWY-8189: L-alanine degradation V (oxidativ   | 208.5578 | 381.3639 | 56.44385 | 0        | 0        | 0        | 237.977  | 86.91934 | 512.5202 | 198.9731 | 0        | 0        |
| PWY-7209: superpathway of pyrimidine ribon    | 205.7194 | 235.1692 | 98.80182 | 25.7358  | 133.1201 | 0        | 874.7845 | 48.25259 | 1238.804 | 408.7333 | 16093.48 | 17388.22 |
| PWY-6803: phosphatidylcholine acyl editing    | 199.7979 | 1608.612 | 2444.911 | 4339.595 | 4618.013 | 3499.62  | 10898.12 | 644.7079 | 16312.81 | 5328.814 | 36025.65 | 49950.77 |
| METHGLYUT-PWY: superpathway of methyl         | 183.0398 | 1658.191 | 930.3531 | 1688.883 | 2177.118 | 1091.418 | 3595.898 | 149.8616 | 2807.859 | 2234.746 | 9096.564 | 13240.92 |
| PWY-5656: mannosylglycerate biosynthesis I    | 180.3752 | 947.5502 | 20.57231 | 2898.061 | 2913.075 | 2400.993 | 11251.94 | 614.916  | 14631.77 | 897.7892 | 0        | 3243.795 |
| PWY-7385: 1,3-propanediol biosynthesis (eng   | 176.883  | 1363.253 | 63.18598 | 2192.896 | 647.6225 | 2326.417 | 565.1852 | 150.7825 | 8587.456 | 2761.649 | 0        | 24945.91 |
| KETOGLUCONMET-PWY: ketogluconate me           | 175.7047 | 1729.466 | 454.0529 | 4610.659 | 4596.671 | 5140.562 | 5968.22  | 646.6999 | 10185.45 | 1144.065 | 58300.9  | 67905.67 |
| HOMOSER-METSYN-PWY: L-methionine bic          | 175.1887 | 1874.456 | 1944.045 | 5313.717 | 5479.204 | 2603.475 | 17111.66 | 1222.33  | 29091.03 | 6731.408 | 58625.23 | 74056.1  |
| PWY-7434: terminal O-glycans residues modi    | 167.2372 | 380.9603 | 210.3492 | 10.32481 | 84.23577 | 186.1607 | 0        | 0        | 7.544507 | 9.785472 | 0        | 0        |
| PWY-6876: isopropanol biosynthesis (engine    | 164.5651 | 207.0797 | 0        | 516.4829 | 93.70169 | 459.8946 | 0        | 0        | 0        | 136.0086 | 0        | 0        |
| P23-PWY: reductive TCA cycle I                | 155.0043 | 2338.979 | 1283.296 | 343.8277 | 0        | 174.8389 | 73.34289 | 0        | 95.16204 | 0        | 0        | 0        |
| FASYN-INITIAL-PWY: superpathway of fatty      | 151.7817 | 329.0536 | 75.07201 | 0        | 0        | 0        | 0        | 0        | 0        | 0        | 189.4029 | 0        |
| PWY0-1415: superpathway of heme b biosyn      | 150.5151 | 1790.865 | 1426.067 | 2789.585 | 3147.874 | 2531.967 | 10209.61 | 1795.762 | 17278.42 | 5967.586 | 38880.51 | 46785.2  |
| P105-PWY: TCA cycle IV (2-oxoglutarate dec    | 149.0161 | 1359.617 | 3200.723 | 2373.604 | 2445.82  | 2243.419 | 9716.257 | 601.3793 | 13671.72 | 5501.27  | 22763.12 | 50445.98 |
| LACTOSECAT-PWY: lactose and galactose c       | 147.3821 | 2097.47  | 1054.996 | 237.9015 | 1056.054 | 2278.388 | 456.3843 | 8213.709 | 3328.794 | 1819.763 | 145.2954 | 1466.468 |

|                                                |          |          |          |          |          |          |          |          |          |          |          |          |
|------------------------------------------------|----------|----------|----------|----------|----------|----------|----------|----------|----------|----------|----------|----------|
| PWY-7992: superpathway of menaquinol-8 bi      | 142.7529 | 408.6581 | 151.2503 | 322.4093 | 0        | 4986.387 | 349.7531 | 0        | 142.037  | 0        | 0        | 0        |
| PWY-7204: pyridoxal 5 -phosphate salvage II    | 140.4039 | 985.5752 | 44.75867 | 2932.794 | 2193.899 | 1908.976 | 10384.51 | 512.1297 | 13158.74 | 2046.698 | 38565.47 | 48042.42 |
| PWY-6961: L-ascorbate degradation II (bacte    | 136.7682 | 1590.265 | 741.4077 | 3003.919 | 3917.078 | 2025.388 | 13366.62 | 1138.702 | 25648.69 | 5551.406 | 56224.32 | 66916.06 |
| REDCITCYC: TCA cycle VI (Helicobacter)         | 133.5335 | 1499.185 | 1267.374 | 833.868  | 978.0001 | 285.8439 | 3108.374 | 253.6644 | 4954.911 | 3426.828 | 2645.127 | 10502.33 |
| PWY-5265: peptidoglycan biosynthesis II (sta   | 131.7435 | 1897.04  | 384.723  | 366.3103 | 0        | 167.3989 | 66.24932 | 7799.074 | 1927.703 | 3674.107 | 0        | 960.3699 |
| PWY-5367: petroselinic acid biosynthesis       | 129.9277 | 878.5955 | 135.5188 | 1897.564 | 1690.421 | 1036.535 | 7269.473 | 417.1415 | 11153.36 | 887.3802 | 28350.19 | 36691.64 |
| PWY-5392: reductive TCA cycle II               | 125.4456 | 543.4784 | 894.8865 | 300.2466 | 0        | 139.0825 | 72.61253 | 0        | 93.44476 | 0        | 0        | 0        |
| P185-PWY: formaldehyde assimilation III (dih   | 122.1989 | 317.9427 | 2172.263 | 83.31954 | 43.60948 | 149.4314 | 109.2764 | 2116.636 | 95.89668 | 5634.663 | 98.37203 | 10954.08 |
| PWY0-1277: 3-phenylpropanoate and 3-(3-hy      | 121.0761 | 967.6384 | 1116.131 | 2506.312 | 2432.974 | 2026.868 | 11285.45 | 990.331  | 18079.63 | 5084.087 | 43814.43 | 54304.6  |
| PWY-5994: palmitate biosynthesis (type I fatt) | 112.9848 | 158.5685 | 79.21983 | 0        | 0        | 0        | 0        | 0        | 0        | 0        | 0        | 0        |
| PWY-7858: (5Z)-dodecenoate biosynthesis II     | 109.9191 | 2961.571 | 2780.451 | 3951.653 | 3728.426 | 2602.314 | 12960.74 | 845.138  | 17763.7  | 6354.645 | 37939.69 | 46168.18 |
| PWY-7340: 9-cis, 11-trans-octadecadienoyl-C    | 107.7998 | 605.9625 | 141.7218 | 770.3024 | 305.0685 | 1194.942 | 1319.123 | 284.997  | 1296.072 | 523.5963 | 138.0095 | 396.8092 |
| PWY0-1338: polymyxin resistance                | 104.0367 | 836.3787 | 1280.349 | 1803.312 | 1620.622 | 1356.714 | 6438.229 | 333.2275 | 10185.34 | 3380.12  | 32685.88 | 38432.28 |
| PWY-5981: CDP-diacylglycerol biosynthesis I    | 103.2764 | 1489.43  | 1582.511 | 1976.239 | 1935.785 | 1573.573 | 3955.682 | 4316.258 | 6225.731 | 4012.573 | 16331.16 | 26478.87 |
| P163-PWY: L-lysine fermentation to acetate a   | 102.1003 | 144.9358 | 125.6027 | 0        | 0        | 0        | 0        | 0        | 0        | 0        | 0        | 0        |
| GLYCOLYSIS-TCA-GLYOX-BYPASS: superp            | 99.38393 | 919.1176 | 1676.187 | 955.6585 | 948.9488 | 1205.955 | 9749.58  | 580.9301 | 15962.03 | 4870.326 | 12052.77 | 14287.03 |
| PWY-7942: 5-oxo-L-proline metabolism           | 98.61014 | 1097.079 | 1569.042 | 863.5411 | 1895.82  | 1714.025 | 5103.148 | 1211.636 | 3086.459 | 5696.737 | 141.3135 | 7443.127 |
| NAD-BIOSYNTHESIS-II: NAD salvage pathw         | 97.66262 | 2604.802 | 1558.005 | 1413.783 | 1781.793 | 1093.979 | 8481.856 | 402.2271 | 14028.24 | 2698.395 | 24894.61 | 39156.57 |
| PWY-5494: pyruvate fermentation to propano     | 95.9755  | 177.5445 | 25.25519 | 0        | 0        | 0        | 107.0045 | 38.99688 | 231.6808 | 90.06045 | 0        | 0        |
| PWY-7688: dTDP-&alpha;-D-ravidosamine ar       | 95.97427 | 72.87155 | 613.2437 | 21.65573 | 476.2767 | 0        | 4187.897 | 35.45336 | 3348.159 | 0        | 0        | 0        |
| PWY490-3: nitrate reduction VI (assimilatory)  | 91.54872 | 38.22464 | 211.0877 | 0        | 0        | 0        | 270.2628 | 0        | 0        | 0        | 0        | 0        |
| PWY-6293: superpathway of L-cysteine biosy     | 85.48127 | 894.6436 | 1677.385 | 75.22081 | 221.5023 | 491.4639 | 4886.641 | 356.64   | 0        | 2523.251 | 394.3532 | 842.8849 |
| P122-PWY: heterolactic fermentation            | 85.38055 | 2435.935 | 1254.243 | 2330.128 | 1293.152 | 603.0923 | 4648.175 | 206.4605 | 6777.765 | 4123.055 | 2260.256 | 20381.77 |
| PWY0-42: 2-methylcitrate cycle I               | 76.77686 | 590.89   | 37.32598 | 1427.839 | 1350.905 | 1405.51  | 6483.475 | 387.6135 | 11309.11 | 1555.617 | 37741.33 | 40561.47 |
| LPSSYN-PWY: superpathway of lipopolysacc       | 72.7125  | 602.1382 | 0        | 730.5074 | 0        | 1290.471 | 0        | 0        | 0        | 1385.153 | 21043.6  | 32330.53 |
| HCAMHPDEG-PWY: 3-phenylpropanoate anc          | 72.21094 | 544.8013 | 715.0858 | 2223.768 | 2253.151 | 1606.531 | 8691.227 | 523.767  | 13869.86 | 3593.542 | 37017.52 | 43472.87 |
| PWY-6690: cinnamate and 3-hydroxycinnam        | 72.21094 | 544.8013 | 715.0858 | 2223.768 | 2253.151 | 1606.531 | 8691.227 | 523.767  | 13869.86 | 3593.542 | 37017.52 | 43472.87 |
| PWY-7039: phosphatidate metabolism, as a       | 71.61807 | 436.8648 | 0        | 695.4319 | 638.8322 | 0        | 4291.307 | 170.7154 | 6665.272 | 615.1506 | 96.82216 | 1280.181 |
| PWY-7316: dTDP-N-acetylviuosamine biosynt      | 70.02874 | 128.0603 | 57.69814 | 648.0948 | 10260.15 | 1255.163 | 4145.122 | 89.89245 | 3310.912 | 591.5377 | 0        | 0        |
| PWY-7389: superpathway of anaerobic energ      | 67.5691  | 521.964  | 0        | 506.0304 | 288.0238 | 0        | 2394.394 | 122.6744 | 1388.829 | 812.5025 | 0        | 0        |
| PWY0-1337: oleate &beta;-oxidation             | 67.3363  | 429.2757 | 990.9656 | 725.0855 | 727.4708 | 2461.567 | 2709.341 | 164.0138 | 4186.312 | 2714.522 | 4856.529 | 4726.249 |
| AST-PWY: L-arginine degradation II (AST pat    | 66.58075 | 593.051  | 1435.102 | 2086.898 | 1869.111 | 1384.5   | 5302.76  | 229.9819 | 8681.414 | 3957.643 | 42168.05 | 50823.4  |
| PWY-7094: fatty acid salvage                   | 63.15907 | 397.9024 | 969.3473 | 641.1248 | 635.5103 | 2585.69  | 2409.453 | 149.0152 | 3678.705 | 2570.568 | 4113.248 | 3980.594 |
| PWY66-367: ketogenesis                         | 57.57033 | 817.0385 | 470.319  | 108.0426 | 143.909  | 375.959  | 0        | 0        | 156.6971 | 413.2829 | 0        | 0        |
| PWY-5972: stearate biosynthesis I (animals)    | 57.10338 | 395.9062 | 47.39622 | 701.732  | 260.6267 | 745.1659 | 1185.528 | 327.1883 | 1131.3   | 376.8878 | 270.7612 | 341.1438 |

|                                                                      |          |          |          |          |          |          |          |          |          |          |          |          |
|----------------------------------------------------------------------|----------|----------|----------|----------|----------|----------|----------|----------|----------|----------|----------|----------|
| PWY-6749: CMP-legionaminate biosynthesis                             | 55.80272 | 294.5699 | 24.47537 | 2368.47  | 1503.907 | 810.9404 | 1065.555 | 124.7347 | 605.9566 | 309.9389 | 0        | 0        |
| PWY-7371: 1,4-dihydroxy-6-naphthoate biosynthesis                    | 53.76052 | 155.0283 | 57.02668 | 122.0117 | 0        | 2099.23  | 132.2857 | 0        | 53.436   | 0        | 0        | 0        |
| PWY-8086: (S)-lactate fermentation to propionate                     | 51.75432 | 304.5656 | 0        | 674.9826 | 284.6141 | 0        | 1779.023 | 68.97862 | 824.9146 | 483.5082 | 0        | 0        |
| PWY-801: homocysteine and cysteine interconversion                   | 51.48642 | 552.7963 | 1074.63  | 45.28474 | 134.0949 | 304.3377 | 3619.343 | 216.4473 | 0        | 1679.359 | 466.5965 | 7751.125 |
| PWY66-389: phytol degradation                                        | 50.83437 | 346.7952 | 1667.861 | 1079.347 | 2131.206 | 94.09322 | 5412.178 | 5229.545 | 23516.62 | 3997.079 | 64123.26 | 52015.22 |
| PWY-5088: L-glutamate degradation VIII (to propionate)               | 50.19033 | 375.2719 | 0        | 987.3914 | 618.6523 | 0        | 768.5635 | 132.826  | 970.2169 | 797.0913 | 0        | 0        |
| PWY-5705: allantoin degradation to glyoxylate                        | 48.24326 | 366.8511 | 85.73281 | 1112.592 | 1018.443 | 837.7067 | 2812.161 | 159.6103 | 4415.43  | 650.5146 | 21544.95 | 29478.53 |
| KDO-NAGLIPASYN-PWY: superpathway of lipopolysaccharide               | 44.84052 | 683.5516 | 1129.314 | 1278.485 | 882.5495 | 629.6744 | 3607.052 | 77.57616 | 5071.125 | 953.6475 | 10025.11 | 18307.67 |
| LIPA-CORESYP-PWY: lipid A-core biosynthesis                          | 43.50676 | 216.3629 | 0        | 211.1242 | 0        | 1530.942 | 0        | 0        | 0        | 589.4381 | 20369.56 | 30610.14 |
| PWY0-461: L-lysine degradation I                                     | 42.74809 | 357.0924 | 0        | 1460.678 | 1554.728 | 302.7258 | 1167.446 | 14.99939 | 1771.496 | 247.2967 | 25080.24 | 10463.94 |
| PWY-7384: anaerobic energy metabolism (interconversion)              | 42.02514 | 348.7735 | 0        | 466.0447 | 305.014  | 0        | 1909.817 | 78.57968 | 1022.563 | 532.4733 | 0        | 0        |
| PRPP-PWY: superpathway of histidine, purine, and pyrimidine          | 41.81825 | 4033.551 | 4216.871 | 4099.454 | 3965.308 | 7538.92  | 3179.149 | 0        | 6113.395 | 6366.016 | 6793.738 | 11287.88 |
| PWY1G-0: mycothiol biosynthesis                                      | 38.62802 | 150.8319 | 87.35309 | 0        | 26.63767 | 0        | 0        | 0        | 0        | 34.13166 | 210.7946 | 0        |
| ECASYN-PWY: enterobacterial common antigen biosynthesis              | 37.96933 | 312.6377 | 1207.938 | 1143.396 | 1179.99  | 945.8006 | 2988.065 | 178.8636 | 5145.346 | 2884.764 | 17540.56 | 23385.48 |
| P221-PWY: octane oxidation                                           | 37.78318 | 308.0082 | 1011.573 | 356.5437 | 491.5526 | 85.96106 | 2061.181 | 3883.614 | 4298.151 | 3286.746 | 16605.69 | 21436.32 |
| PWY-7294: D-xylose degradation IV                                    | 32.45503 | 314.9935 | 91.77834 | 60.52349 | 0        | 776.8146 | 0        | 0        | 0        | 373.5793 | 0        | 0        |
| PWY-7159: 3,8-divinyl-chlorophyllide a biosynthesis                  | 31.88101 | 72.57675 | 13.45117 | 0        | 0        | 110.101  | 97.37855 | 40.73045 | 85.75245 | 338.9762 | 0        | 0        |
| PWY-5531: 3,8-divinyl-chlorophyllide a biosynthesis                  | 30.24812 | 72.58148 | 13.48765 | 0        | 0        | 110.7639 | 97.81086 | 44.08424 | 86.51607 | 362.4633 | 0        | 0        |
| PWY-6953: dTDP-3-acetamido-&alpha;-D-fucose                          | 30.24098 | 18.96779 | 367.4353 | 0        | 0        | 0        | 3192.449 | 25.1042  | 2196.671 | 0        | 0        | 0        |
| PWY-5747: 2-methylcitrate cycle II                                   | 28.28176 | 224.3679 | 21.79314 | 330.2587 | 336.2686 | 217.4004 | 4523.601 | 226.2606 | 7530.129 | 1460.163 | 6123.652 | 8957.485 |
| PWY-7731: superpathway of photosynthetic hydrogen                    | 27.9092  | 0        | 0        | 0        | 0        | 0        | 0        | 0        | 0        | 13.60659 | 0        | 0        |
| PWY-7374: 1,4-dihydroxy-6-naphthoate biosynthesis                    | 27.64346 | 131.9179 | 41.10402 | 0        | 0        | 0        | 0        | 0        | 0        | 0        | 0        | 0        |
| PWY0-41: allantoin degradation IV (anaerobic)                        | 26.78538 | 211.0954 | 0        | 701.9716 | 555.7891 | 280.0377 | 2534.283 | 124.2923 | 3925.882 | 445.8759 | 8792.574 | 16755.26 |
| DENOVOPURINE2-PWY: superpathway of purine                            | 24.27118 | 3628.053 | 4215.402 | 3712.483 | 3507.532 | 7444.688 | 2268.469 | 0        | 4143.433 | 6071.434 | 6066.996 | 10149.57 |
| PWY-5692: allantoin degradation to glyoxylate                        | 22.70653 | 174.4003 | 0        | 476.1292 | 51.79451 | 230.8009 | 1439.644 | 60.48181 | 2377.074 | 310.1973 | 7477.268 | 12339.91 |
| URDEGR-PWY: superpathway of allantoin degradation                    | 22.70653 | 174.4003 | 0        | 476.1292 | 51.79451 | 230.8009 | 1439.644 | 60.48181 | 2377.074 | 310.1973 | 7477.268 | 12339.91 |
| PWY-6210: 2-aminophenol degradation                                  | 21.78653 | 47.07395 | 161.6188 | 0        | 0        | 0        | 7.137882 | 0        | 4.929312 | 286.696  | 0        | 2136.47  |
| PWY-5055: nicotinate degradation III                                 | 21.20156 | 159.0407 | 18.39668 | 50.40647 | 0        | 0        | 0        | 0        | 0        | 0        | 0        | 0        |
| PWY-7409: phospholipid remodeling (phospholipid)                     | 21.15757 | 160.8844 | 0        | 747.2288 | 0        | 0        | 0        | 0        | 93.41951 | 454.17   | 9103.026 | 18464.51 |
| PWY-7723: bacterial bioluminescence                                  | 20.18409 | 209.0918 | 132.7911 | 0        | 0        | 0        | 0        | 0        | 0        | 0        | 0        | 0        |
| PWY-7187: pyrimidine deoxyribonucleotides biosynthesis               | 20.13092 | 1532.908 | 1685.478 | 2010.668 | 1775.21  | 2841.271 | 1853.937 | 0        | 3419.027 | 3890.353 | 5081.466 | 8603.813 |
| ARGDEG-PWY: superpathway of L-arginine, ornithine, and citrulline    | 19.22773 | 78.22507 | 588.1083 | 1064.858 | 678.3785 | 0        | 2518.772 | 116.8905 | 4001.403 | 2047.198 | 30897.79 | 45745.08 |
| ORNARGDEG-PWY: superpathway of L-arginine, ornithine, and citrulline | 19.22773 | 78.22507 | 588.1083 | 1064.858 | 678.3785 | 0        | 2518.772 | 116.8905 | 4001.403 | 2047.198 | 30897.79 | 45745.08 |
| 3-HYDROXYPHENYLACETATE-DEGRADATION                                   | 18.98332 | 207.721  | 707.9767 | 0        | 0        | 0        | 4463.363 | 205.5105 | 7288.423 | 2215.382 | 17671.68 | 6092.153 |
| PWY-101: photosynthesis light reactions                              | 18.76313 | 0        | 0        | 0        | 0        | 0        | 0        | 0        | 0        | 9.074058 | 0        | 0        |

|                                                                 |          |          |          |          |          |          |          |          |          |          |          |          |
|-----------------------------------------------------------------|----------|----------|----------|----------|----------|----------|----------|----------|----------|----------|----------|----------|
| PWY-7446: sulfoquinovose degradation I                          | 18.01258 | 168.5847 | 50.56139 | 610.8605 | 626.5195 | 369.8509 | 2034.453 | 94.21985 | 3340.906 | 96.49613 | 8247.616 | 17956.43 |
| PWY-7805: (aminomethyl)phosphonate degradation I                | 17.91037 | 199.115  | 0        | 583.4644 | 89.04147 | 154.3269 | 0        | 0        | 729.8711 | 636.7573 | 11691.03 | 9660.574 |
| CARNMET-PWY: L-carnitine degradation I                          | 16.72558 | 137.0197 | 0        | 451.2913 | 334.8296 | 483.0946 | 37.85296 | 0        | 406.3592 | 235.4838 | 5151.081 | 8908.189 |
| PWY-7807: glyphosate degradation III                            | 16.57856 | 189.6355 | 3.79851  | 542.0897 | 78.90842 | 137.481  | 0        | 0        | 915.9612 | 683.9902 | 15231.65 | 9514.592 |
| CATECHOL-ORTHO-CLEAVAGE-PWY: catechol degradation I             | 13.86142 | 35.59753 | 806.483  | 0        | 0        | 9.482519 | 0        | 0        | 0        | 1852.544 | 0        | 2780.02  |
| PWY-5724: superpathway of atrazine degradation I                | 13.36637 | 54.26865 | 0        | 0        | 0        | 50.09117 | 100.5881 | 0        | 205.7062 | 0        | 0        | 0        |
| PWY-7616: methanol oxidation to carbon dioxide                  | 11.55553 | 6.851527 | 130.1652 | 0        | 68.88466 | 0        | 716.8474 | 130.6047 | 1311.922 | 591.4825 | 843.3208 | 4744.453 |
| THREOCAT-PWY: superpathway of L-threonine degradation I         | 10.81966 | 99.81856 | 2186.352 | 279.4385 | 227.9668 | 76.78172 | 7395.869 | 1432.882 | 9029.134 | 4666.792 | 0        | 9755.484 |
| PWY-7399: methylphosphonate degradation I                       | 10.78082 | 14.60599 | 0        | 0        | 0        | 0        | 23.17928 | 82.19125 | 0        | 0        | 0        | 0        |
| PWY0-1533: methylphosphonate degradation I                      | 9.619339 | 112.4504 | 2.171946 | 322.131  | 45.30671 | 79.48322 | 0        | 0        | 531.4108 | 405.1139 | 10332.77 | 5863.212 |
| PWY-6318: L-phenylalanine degradation IV (reductive)            | 9.422751 | 119.2893 | 0        | 130.6849 | 51.21751 | 109.1291 | 413.7994 | 113.1441 | 577.4296 | 263.157  | 88.65741 | 3000.881 |
| PWY-7820: teichuronic acid biosynthesis (B. subtilis)           | 9.033016 | 2.512259 | 260.8617 | 1967.249 | 1524.059 | 0        | 18.0453  | 196.2618 | 264.3121 | 0        | 0        | 0        |
| GLYCOL-GLYOXDEG-PWY: superpathway of glycolysis I               | 8.235992 | 265.8044 | 67.1582  | 437.2379 | 323.622  | 499.0506 | 3658.693 | 184.8496 | 5266.457 | 703.3706 | 11003.39 | 13864.84 |
| P125-PWY: superpathway of (R,R)-butanedioate degradation I      | 8.19228  | 595.0864 | 182.4119 | 52.60977 | 177.1977 | 411.0585 | 75.79377 | 403.3574 | 214.1641 | 427.9004 | 8.521794 | 547.5897 |
| UBISYN-PWY: superpathway of ubiquinol-8 biosynthesis I          | 8.031584 | 223.5944 | 0        | 467.0186 | 436.022  | 311.6091 | 0        | 0        | 1759.908 | 185.9371 | 672.5077 | 5880.946 |
| PWY-7218: photosynthetic 3-hydroxybutanoate degradation I       | 7.638283 | 0        | 0        | 0        | 0        | 0        | 0        | 0        | 0        | 0        | 0        | 0        |
| PWY-6708: ubiquinol-8 biosynthesis (early development)          | 7.156774 | 203.4936 | 0        | 421.2141 | 393.6658 | 279.5904 | 0        | 0        | 1586.148 | 166.3863 | 604.956  | 5440.046 |
| PWY-7124: ethene biosynthesis V (engineered)                    | 6.545946 | 0        | 0        | 0        | 0        | 0        | 0        | 0        | 0        | 0        | 0        | 0        |
| PWY0-1221: putrescine degradation II                            | 6.112989 | 13.88631 | 0        | 437.9246 | 243.3838 | 0        | 1601.163 | 78.63851 | 2527.812 | 254.6107 | 15873.27 | 18343.68 |
| DARABCATK12-PWY: D-arabinose degradation I                      | 5.229156 | 266.2866 | 67.60921 | 415.9893 | 304.4577 | 491.2549 | 3546.429 | 181.302  | 5130.414 | 680.2538 | 10733.2  | 13728.61 |
| PWY-5855: ubiquinol-7 biosynthesis (early development)          | 5.174275 | 285.4831 | 874.862  | 407.0157 | 428.7596 | 290.8867 | 4488.62  | 205.4882 | 7307.95  | 2163.985 | 16516.6  | 18592.27 |
| PWY-5654: 2-amino-3-carboxymuconate serrate degradation I       | 4.098187 | 2.544635 | 161.6188 | 0        | 0        | 0        | 0        | 0        | 0        | 52.27581 | 0        | 2136.47  |
| PHOTOALL-PWY: oxygenic photosynthesis I                         | 4.044161 | 0        | 0        | 0        | 0        | 0        | 0        | 0        | 0        | 0        | 0        | 0        |
| PWY-5910: superpathway of geranylgeranyldiphosphate synthesis I | 0        | 1082.438 | 399.3725 | 57.86125 | 357.5647 | 459.7215 | 0        | 0        | 269.4004 | 144.5402 | 139.6596 | 446.0098 |
| PWY-5180: toluene degradation I (aerobic) (vibrio)              | 0        | 1046.296 | 1089.695 | 2493.242 | 2362.493 | 2058.57  | 0        | 0        | 0        | 5029.117 | 0        | 56533.53 |
| PWY-922: mevalonate pathway I (eukaryotes)                      | 0        | 778.1895 | 283.6466 | 40.56863 | 258.2693 | 328.6033 | 0        | 0        | 190.8304 | 105.1022 | 105.5885 | 328.5605 |
| PWY-5464: superpathway of cytosolic glycolysis I                | 0        | 718.0712 | 489.8751 | 332.6975 | 403.9736 | 305.5198 | 220.0012 | 1139.837 | 1327.968 | 2176.677 | 0        | 0        |
| PWY-2201: folate transformations I                              | 0        | 323.1148 | 0        | 0        | 0        | 0        | 0        | 0        | 0        | 0        | 0        | 0        |
| DENITRIFICATION-PWY: nitrate reduction I (bacteria)             | 0        | 305.0645 | 44.48274 | 0        | 0        | 0        | 0        | 0        | 0        | 0        | 0        | 0        |
| PWY-7269: mitochondrial NADPH production I                      | 0        | 206.821  | 1272.756 | 833.1897 | 1018.401 | 0        | 7288.302 | 473.0016 | 13675.07 | 3488.759 | 31504.07 | 29823.1  |
| AEROBACTINSYN-PWY: aerobactin biosynthesis I                    | 0        | 200.5699 | 0        | 1442.337 | 1199.916 | 403.4348 | 680.9555 | 369.3389 | 10988.2  | 523.9379 | 1345.303 | 665.8172 |
| PWY-6562: norspermidine biosynthesis I                          | 0        | 186.2796 | 1110.669 | 0        | 0        | 0        | 0        | 0        | 0        | 79.50143 | 0        | 0        |
| PWY-5415: catechol degradation I (meta-cleavage)                | 0        | 184.708  | 36.03127 | 33.52413 | 178.3255 | 245.6878 | 0        | 0        | 0        | 198.3234 | 0        | 1205.134 |
| P621-PWY: nylon-6 oligomer degradation I                        | 0        | 159.818  | 68.17939 | 45.19178 | 0        | 70.13636 | 0        | 0        | 0        | 249.1861 | 0        | 760.3606 |
| PWY-8190: L-glutamate degradation XI (reductive)                | 0        | 102.066  | 33.12795 | 89.94231 | 29.18585 | 114.3243 | 142.4626 | 60.65847 | 649.9754 | 1705.349 | 0        | 0        |

|                                                |   |          |          |          |          |          |          |          |          |          |          |          |
|------------------------------------------------|---|----------|----------|----------|----------|----------|----------|----------|----------|----------|----------|----------|
| PWY-822: fructan biosynthesis                  | 0 | 94.00093 | 48.07386 | 45.17096 | 0        | 119.6534 | 0        | 0        | 0        | 21.34956 | 0        | 0        |
| UDPNACETYLGALSYN-PWY: UDP-N-acetyl-            | 0 | 86.81395 | 18.73639 | 0        | 0        | 23.34754 | 0        | 0        | 13.9826  | 0        | 185.2146 | 0        |
| PROTocatechuate-ortho-cleavage                 | 0 | 78.65924 | 927.152  | 8.441394 | 0        | 11.48434 | 0        | 0        | 79.67455 | 3605.376 | 0        | 3846.598 |
| PWY-7165: L-ascorbate biosynthesis VIII (en    | 0 | 67.45574 | 800.8795 | 0        | 0        | 23.33329 | 0        | 0        | 0        | 1978.721 | 0        | 13568.79 |
| PWY-2221: Entner-Doudoroff pathway III (ser    | 0 | 47.32384 | 414.1463 | 0        | 0        | 0        | 0        | 0        | 0        | 2395.257 | 0        | 0        |
| PWY-7874: L-threonate degradation              | 0 | 46.79727 | 0        | 35.19644 | 0        | 78.28473 | 987.7724 | 45.06038 | 1629.8   | 322.6966 | 13119.53 | 14061.96 |
| PWY-5417: catechol degradation III (ortho-cle  | 0 | 42.31726 | 956.8871 | 0        | 0        | 0        | 0        | 0        | 0        | 2438.605 | 0        | 3817.489 |
| PWY-5431: aromatic compounds degradati         | 0 | 42.31726 | 956.8871 | 0        | 0        | 0        | 0        | 0        | 0        | 2438.605 | 0        | 3817.489 |
| PWY-6143: CMP-pseudamate biosynthesis          | 0 | 37.31062 | 0        | 16.56658 | 0        | 21.10327 | 0        | 0        | 0        | 0        | 0        | 0        |
| PWY-7245: superpathway of NAD/NADP - N/        | 0 | 34.95527 | 686.2011 | 0        | 0        | 0        | 0        | 0        | 0        | 2190.848 | 0        | 90.35271 |
| PWY-7268: cytosolic NADPH production (yea      | 0 | 28.62845 | 700.1232 | 0        | 0        | 0        | 0        | 0        | 0        | 2310.728 | 0        | 67.84345 |
| PWY-7873: D-erythronate degradation II         | 0 | 28.35518 | 0        | 29.41463 | 0        | 50.55723 | 444.239  | 0        | 723.6912 | 322.6966 | 13119.53 | 14061.96 |
| 1,2-dichloroethane-PWY: 1,2-dichloroetha       | 0 | 18.58941 | 56.49476 | 0        | 0        | 0        | 0        | 0        | 0        | 0        | 0        | 0        |
| PWY-7031: protein N-glycosylation (bacterial)  | 0 | 18.13711 | 0        | 0        | 0        | 0        | 0        | 0        | 0        | 0        | 0        | 0        |
| PWY-6215: 4-chlorobenzoate degradation         | 0 | 13.76764 | 0        | 11.84104 | 0        | 0        | 0        | 0        | 0        | 470.5059 | 0        | 2043.96  |
| URSIN-PWY: ureide biosynthesis                 | 0 | 13.653   | 296.6621 | 0        | 0        | 0        | 0        | 0        | 0        | 316.5659 | 252.0856 | 3225.679 |
| PWY66-430: myristate biosynthesis (mitochor    | 0 | 13.05246 | 795.0676 | 1276.971 | 1196.769 | 0        | 9284.956 | 502.3864 | 15409.54 | 2475.756 | 258.655  | 6894.263 |
| PWY-7388: octanoyl-[acyl-carrier protein] bios | 0 | 12.44786 | 863.9586 | 1241.06  | 1167.206 | 0        | 9198.466 | 498.3515 | 15299.57 | 2525.474 | 246.643  | 6605.334 |
| PWY-7332: superpathway of UDP-N-acetylgl       | 0 | 12.40969 | 0        | 45.83345 | 0        | 0        | 0        | 0        | 0        | 0        | 0        | 0        |
| PWY-6182: superpathway of salicylate degra     | 0 | 12.32326 | 831.7186 | 0        | 0        | 0        | 0        | 0        | 0        | 2133.01  | 0        | 3569.24  |
| PWY-6518: bile acids epimerization             | 0 | 11.80232 | 0        | 0        | 0        | 0        | 0        | 0        | 0        | 0        | 0        | 0        |
| PWY-3801: sucrose degradation II (sucrose s    | 0 | 11.23167 | 611.8129 | 0        | 0        | 0        | 0        | 0        | 0        | 1504.513 | 398.7361 | 3839.838 |
| TYRFUMCAT-PWY: L-tyrosine degradation I        | 0 | 11.21408 | 0        | 0        | 0        | 0        | 0        | 0        | 0        | 33.57623 | 0        | 0        |
| PWY-6185: 4-methylcatechol degradation (ori    | 0 | 9.74982  | 880.9864 | 0        | 0        | 0        | 0        | 0        | 0        | 3118.658 | 0        | 3888.558 |
| PWY-7396: butanol and isobutanol biosynthe     | 0 | 9.52681  | 332.1914 | 0        | 0        | 0        | 0        | 0        | 0        | 980.8728 | 366.8293 | 3133.804 |
| PWY-5514: UDP-N-acetyl-D-galactosamine b       | 0 | 4.592011 | 18.42691 | 0        | 0        | 0        | 0        | 0        | 13.86191 | 0        | 103.1516 | 0        |
| PWY5F9-12: biphenyl degradation                | 0 | 0        | 132.1926 | 0        | 0        | 0        | 0        | 0        | 0        | 1154.674 | 0        | 46.25453 |
| P562-PWY: myo-inositol degradation I           | 0 | 0        | 77.95796 | 0        | 0        | 0        | 0        | 0        | 0        | 76.60909 | 0        | 0        |
| PWY-1501: mandelate degradation I              | 0 | 0        | 25.39769 | 0        | 0        | 0        | 0        | 0        | 0        | 99.00024 | 0        | 0        |
| PWY-6641: superpathway of sulfolactate deg     | 0 | 0        | 17.25006 | 0        | 0        | 0        | 0        | 0        | 0        | 213.9546 | 0        | 0        |
| PWY-7312: dTDP-&beta;-D-fucofuranose bio       | 0 | 0        | 0        | 3123.305 | 27534.86 | 14651.76 | 0        | 0        | 0        | 0        | 0        | 0        |
| PWY-8173: anteiso-branched-chain fatty acid    | 0 | 0        | 0        | 399.3012 | 517.7758 | 0        | 208.8509 | 2499.312 | 2754.164 | 0        | 0        | 0        |
| PWY-8174: odd iso-branched-chain fatty acid    | 0 | 0        | 0        | 399.3012 | 517.7758 | 0        | 208.8509 | 2499.312 | 2754.164 | 0        | 0        | 0        |
| PWY-8175: even iso-branched-chain fatty aci    | 0 | 0        | 0        | 399.3012 | 517.7758 | 0        | 208.8509 | 2499.312 | 2754.164 | 0        | 0        | 0        |
| PWY-6328: L-lysine degradation X               | 0 | 0        | 0        | 41.16755 | 0        | 22.67666 | 1167.446 | 14.99939 | 1771.496 | 147.7009 | 3343.751 | 8206.473 |

|                                              |   |   |   |   |          |         |          |          |          |          |          |          |
|----------------------------------------------|---|---|---|---|----------|---------|----------|----------|----------|----------|----------|----------|
| PWY-6471: peptidoglycan biosynthesis IV (Er  | 0 | 0 | 0 | 0 | 352.5439 | 0       | 0        | 0        | 0        | 0        | 0        | 0        |
| CHLOROPHYLL-SYN: 3,8-divinyl-chlorophylli    | 0 | 0 | 0 | 0 | 0        | 51.3098 | 0        | 0        | 0        | 0        | 0        | 0        |
| PWY-6071: superpathway of phenylethylamin    | 0 | 0 | 0 | 0 | 0        | 0       | 3539.983 | 180.9362 | 5231.875 | 271.4914 | 10271.36 | 20429.46 |
| PWY0-321: phenylacetate degradation I (aerc  | 0 | 0 | 0 | 0 | 0        | 0       | 3247.955 | 169.0679 | 4809.606 | 226.1605 | 9252.339 | 19562.99 |
| PWY-7317: superpathway of dTDP-glucose-d     | 0 | 0 | 0 | 0 | 0        | 0       | 164.6303 | 0        | 0        | 0        | 0        | 0        |
| PWY-7754: bile acid 7&alpha;-dehydroxylatio  | 0 | 0 | 0 | 0 | 0        | 0       | 28.15583 | 0        | 48.21985 | 0        | 0        | 0        |
| PWY-8134: bile acid 7&beta;-dehydroxylation  | 0 | 0 | 0 | 0 | 0        | 0       | 26.4055  | 0        | 49.1192  | 0        | 0        | 0        |
| PWY-7318: dTDP-3-acetamido-3,6-dideoxy-8     | 0 | 0 | 0 | 0 | 0        | 0       | 0        | 513.8114 | 0        | 0        | 0        | 0        |
| PWY-6138: CMP-N-acetylneuramate biosyr       | 0 | 0 | 0 | 0 | 0        | 0       | 0        | 21.99548 | 0        | 0        | 0        | 0        |
| PWY-6396: superpathway of 2,3-butanediol b   | 0 | 0 | 0 | 0 | 0        | 0       | 0        | 0        | 129.3935 | 299.1605 | 0        | 720.7866 |
| PWY-7391: isoprene biosynthesis II (engineer | 0 | 0 | 0 | 0 | 0        | 0       | 0        | 0        | 117.6379 | 53.9474  | 83.30726 | 177.2701 |
| PWY-7196: superpathway of pyrimidine ribonl  | 0 | 0 | 0 | 0 | 0        | 0       | 0        | 0        | 0        | 252.6116 | 0        | 0        |
| PWY-6957: mandelate degradation to acetyl-(  | 0 | 0 | 0 | 0 | 0        | 0       | 0        | 0        | 0        | 161.991  | 0        | 0        |
| PWY-5178: toluene degradation IV (aerobic) ( | 0 | 0 | 0 | 0 | 0        | 0       | 0        | 0        | 0        | 80.33159 | 0        | 0        |
| DHGLUCONATE-PYR-CAT-PWY: glucose de          | 0 | 0 | 0 | 0 | 0        | 0       | 0        | 0        | 0        | 73.2614  | 0        | 0        |
| PWY-3781: aerobic respiration I (cytochrome  | 0 | 0 | 0 | 0 | 0        | 0       | 0        | 0        | 0        | 65.19508 | 0        | 0        |
| PWY-6565: superpathway of polyamine biosy    | 0 | 0 | 0 | 0 | 0        | 0       | 0        | 0        | 0        | 64.9031  | 0        | 0        |
| PWY-7279: aerobic respiration II (cytochrome | 0 | 0 | 0 | 0 | 0        | 0       | 0        | 0        | 0        | 64.89074 | 0        | 0        |
| PWY-7528: L-methionine salvage cycle I (bac  | 0 | 0 | 0 | 0 | 0        | 0       | 0        | 0        | 0        | 48.97896 | 0        | 0        |
| PWY-7527: L-methionine salvage cycle III     | 0 | 0 | 0 | 0 | 0        | 0       | 0        | 0        | 0        | 44.94649 | 0        | 0        |
| PWY-7783: plasmalogen degradation            | 0 | 0 | 0 | 0 | 0        | 0       | 0        | 0        | 0        | 40.13119 | 0        | 0        |
| PWY-5028: L-histidine degradation II         | 0 | 0 | 0 | 0 | 0        | 0       | 0        | 0        | 0        | 33.61818 | 0        | 0        |
| PWY-4361: S-methyl-5-thio-&alpha;-D-ribose   | 0 | 0 | 0 | 0 | 0        | 0       | 0        | 0        | 0        | 28.84202 | 0        | 0        |
| PWY-5004: superpathway of L-citrulline metal | 0 | 0 | 0 | 0 | 0        | 0       | 0        | 0        | 0        | 24.64144 | 0        | 0        |
| ALL-CHORISMATE-PWY: superpathway of c        | 0 | 0 | 0 | 0 | 0        | 0       | 0        | 0        | 0        | 0        | 1277.591 | 0        |
| PWY-7411: phosphatidate biosynthesis (yeas   | 0 | 0 | 0 | 0 | 0        | 0       | 0        | 0        | 0        | 0        | 288.3001 | 0        |
| PWY-6981: chitin biosynthesis                | 0 | 0 | 0 | 0 | 0        | 0       | 0        | 0        | 0        | 0        | 260.04   | 0        |
| PWY-6421: arsenate detoxification IV (mycott | 0 | 0 | 0 | 0 | 0        | 0       | 0        | 0        | 0        | 0        | 257.1514 | 0        |
| PWY-5870: ubiquinol-8 biosynthesis (late dec | 0 | 0 | 0 | 0 | 0        | 0       | 0        | 0        | 0        | 0        | 190.4147 | 0        |
| PWY-5873: ubiquinol-7 biosynthesis (late dec | 0 | 0 | 0 | 0 | 0        | 0       | 0        | 0        | 0        | 0        | 132.2947 | 0        |
| PWY-7511: protein ubiquitination             | 0 | 0 | 0 | 0 | 0        | 0       | 0        | 0        | 0        | 0        | 106.1037 | 0        |
| NADSYN-PWY: NAD de novo biosynthesis II      | 0 | 0 | 0 | 0 | 0        | 0       | 0        | 0        | 0        | 0        | 81.46002 | 0        |
| PWY-5080: very long chain fatty acid biosynt | 0 | 0 | 0 | 0 | 0        | 0       | 0        | 0        | 0        | 0        | 73.60372 | 0        |
| PWY3DJ-12: ceramide de novo biosynthesis     | 0 | 0 | 0 | 0 | 0        | 0       | 0        | 0        | 0        | 0        | 65.18898 | 0        |
| PWY-5651: L-tryptophan degradation to 2-am   | 0 | 0 | 0 | 0 | 0        | 0       | 0        | 0        | 0        | 0        | 56.40117 | 0        |







| AP005_1  | AP005_2  | AP005_3  | AP006_1  | AP006_2  | AP006_3  | AP007_1  | AP007_2  | AP007_3  | AP008_1  | AP008_2  | AP008_3  | AP009_1  | AP009_2  | AP009_3  | AP010_1  |
|----------|----------|----------|----------|----------|----------|----------|----------|----------|----------|----------|----------|----------|----------|----------|----------|
| 12842055 | 12362441 | 21392890 | 14030415 | 12891976 | 11403728 | 18677988 | 16535315 | 21510438 | 14359149 | 21071966 | 19248656 | 9926887  | 10542605 | 14080028 | 9571212  |
| 56703574 | 66741665 | 77568424 | 73749543 | 65050197 | 65746684 | 1.02E+08 | 1.13E+08 | 1.01E+08 | 1.13E+08 | 1.26E+08 | 1.19E+08 | 46171296 | 52629102 | 36696849 | 52774220 |
| 76478.64 | 57055.03 | 66014.88 | 68436.1  | 71468.85 | 50710.52 | 49036.2  | 43950.43 | 44107.13 | 21423.03 | 64752.63 | 44031.03 | 38331.35 | 36803.83 | 34219.26 | 34729.04 |
| 35790.03 | 29840.76 | 54615.29 | 50399.37 | 44191.51 | 38689.84 | 40483.42 | 41987.22 | 43007.95 | 34849.01 | 51252.91 | 46958.38 | 30069.76 | 28219.66 | 28596.42 | 32085.71 |
| 35123.24 | 31325.69 | 66612.32 | 55026.51 | 45849.92 | 40833.28 | 53053.22 | 61463.3  | 58056.04 | 53228.2  | 66386.19 | 65839.69 | 31442.4  | 32869.96 | 28012.77 | 28642.28 |
| 35251.19 | 27428.21 | 62250.39 | 51566.05 | 42942.07 | 33737.05 | 46664.93 | 38245.6  | 47723.81 | 36274.27 | 44775.48 | 38863.54 | 30391.65 | 29374.07 | 25389.84 | 30322.36 |
| 35251.19 | 27428.21 | 62250.39 | 51566.05 | 42942.07 | 33737.05 | 46664.93 | 38245.6  | 47723.81 | 36274.27 | 44775.48 | 38863.54 | 30391.65 | 29374.07 | 25389.84 | 30322.36 |
| 35251.19 | 27428.21 | 62250.39 | 51566.05 | 42942.07 | 33737.05 | 46664.93 | 38245.6  | 47723.81 | 36274.27 | 44775.48 | 38863.54 | 30391.65 | 29374.07 | 25389.84 | 30322.36 |
| 33901.42 | 36139.7  | 62370.45 | 47007.89 | 40957.32 | 36150.19 | 51734.89 | 58154.33 | 51264.93 | 60118.91 | 64739.16 | 63813.4  | 34469.67 | 32526.29 | 33977.12 | 34502.88 |
| 32780.94 | 28224.43 | 60799.34 | 47052.42 | 31134.98 | 34947.09 | 45298.71 | 37234.37 | 46264.98 | 35818.15 | 47187.55 | 50757.71 | 30831.19 | 30253.66 | 31465.74 | 29856.51 |
| 32809.08 | 27708.18 | 53716.07 | 48003    | 40601.41 | 33467.17 | 41859.21 | 37985.44 | 43201.09 | 40993    | 51700.37 | 43819.9  | 28189.26 | 26049.1  | 27226.27 | 28256.63 |
| 31310.08 | 23459.29 | 55984.94 | 48191.6  | 42161.73 | 35269.61 | 42592.05 | 34928.09 | 42382.98 | 34255.88 | 46203.3  | 43004.6  | 28700.6  | 26136.2  | 28158.74 | 27564.36 |
| 30422.26 | 21457.73 | 51714.08 | 49064.85 | 37544.54 | 33444.48 | 33469.51 | 31069.11 | 35617.4  | 26293.25 | 40703.07 | 36620.85 | 25565.25 | 22539.3  | 20880.35 | 25717.42 |
| 31269.86 | 25842    | 59898.18 | 47110.54 | 42175.84 | 35894.76 | 47355.92 | 43276.38 | 50903.89 | 42897.3  | 53704.67 | 52076.89 | 28703.96 | 26374.12 | 29111.13 | 28527.51 |
| 30675.77 | 22893.48 | 60405.83 | 45622.2  | 40033.87 | 34271.82 | 46582.18 | 42059.31 | 51094.15 | 40137.67 | 51341.82 | 49789.97 | 28127.84 | 26101.97 | 28031.98 | 28626.63 |
| 35916.85 | 27791.3  | 59198.77 | 43723.72 | 43197.2  | 35575.53 | 37786.47 | 39393.05 | 37749.81 | 35465.62 | 54763.13 | 48038.72 | 27575.25 | 22710.08 | 24659.46 | 30503.51 |
| 34903.42 | 27583.77 | 53135.73 | 48671.44 | 47398.17 | 37075.79 | 42294.11 | 36057.89 | 44087.89 | 36024.67 | 49171.93 | 50138.62 | 29376.82 | 28062.3  | 27615.49 | 28763.71 |
| 27627.14 | 22258.81 | 55417.91 | 45462.41 | 41292.77 | 33236.96 | 37051.98 | 34245.98 | 41677.95 | 30527.61 | 46313.1  | 40921.5  | 26512.08 | 22105.71 | 26215.94 | 25452.42 |
| 30556.44 | 24314.95 | 59463.88 | 45551.02 | 41871.69 | 34443.65 | 46265.07 | 42148.81 | 50670.9  | 41198.51 | 52060.77 | 52245.13 | 28303.11 | 26089.64 | 28797.2  | 28411.43 |
| 34909.77 | 29574.04 | 50109.54 | 48179.6  | 37987.28 | 36891.61 | 44494.48 | 39901.41 | 47664.73 | 39712.77 | 52313.23 | 54587.65 | 29233.94 | 29521.55 | 30135.83 | 28364.71 |
| 29650.63 | 23940.37 | 51282.74 | 45512.42 | 38918.65 | 35200.96 | 43459.44 | 40744.94 | 42792.18 | 38119.34 | 49093.1  | 48846.26 | 25080.24 | 24980.16 | 20967.5  | 27215.34 |
| 30533.83 | 24539.89 | 59440.35 | 45332.97 | 41534.87 | 34496.29 | 45471.84 | 41078.6  | 49452.8  | 40139.32 | 51064.17 | 49268.42 | 28258.18 | 26085.25 | 29154.8  | 28120.82 |
| 29450.6  | 21301.51 | 57245.93 | 44671.47 | 41887.59 | 34035.08 | 45666.89 | 41095.32 | 50742.12 | 39055.69 | 49944.39 | 49044.3  | 28074.49 | 25730.04 | 28013.8  | 28362.3  |
| 29149.05 | 24484.71 | 53095.91 | 44245.74 | 37098.11 | 33794.38 | 43371.08 | 40083.62 | 42324.44 | 39828.86 | 49099.83 | 48444.74 | 25203.74 | 24891.59 | 23353.67 | 26891.17 |
| 29149.05 | 24484.71 | 53095.91 | 44245.74 | 37098.11 | 33794.38 | 43371.08 | 40083.62 | 42324.44 | 39828.86 | 49099.83 | 48444.74 | 25203.74 | 24891.59 | 23353.67 | 26891.17 |
| 26016.02 | 49675.43 | 58782.88 | 45987.47 | 27247.2  | 46014.81 | 75137.17 | 90926.79 | 77121.04 | 116352.3 | 97901.65 | 126143.6 | 29686.82 | 30005.48 | 23199.95 | 27780.84 |
| 30607.68 | 24061.92 | 51389.8  | 43411.16 | 36861.94 | 30729.22 | 38450.3  | 34308.63 | 37739.31 | 29133.25 | 43253.34 | 37798.34 | 27227.31 | 25093.59 | 22532.9  | 26289.75 |
| 31519.27 | 28202.03 | 46874.42 | 43618.21 | 41272.22 | 31698.86 | 42190.37 | 39660.54 | 43571.97 | 43838.42 | 52090.85 | 45177.47 | 26514.17 | 24995.03 | 23801.93 | 27250.02 |
| 30403.36 | 25812.68 | 51577.64 | 41640.78 | 37890.57 | 31672.82 | 44906.78 | 40076.26 | 45461.03 | 40397.23 | 49692.32 | 49495.56 | 26325.32 | 25705.98 | 25036.5  | 25123.62 |
| 33422.15 | 26157.29 | 44795.36 | 42702.14 | 35462.21 | 32155.93 | 43751.86 | 41935.82 | 46815.6  | 47837.94 | 50896.77 | 54269.16 | 27226.19 | 26836.83 | 25723.78 | 26464.71 |
| 33422.15 | 26157.29 | 44795.36 | 42702.14 | 35462.21 | 32155.93 | 43751.86 | 41939.17 | 46815.6  | 47873.69 | 51056.44 | 54288.25 | 27226.19 | 26836.83 | 25737.01 | 26464.71 |
| 31408.23 | 26560.04 | 48951.13 | 42778.73 | 42105.51 | 33177.14 | 44167.05 | 39886    | 45615.08 | 35905.88 | 48322.65 | 43503.96 | 26827.44 | 24903.15 | 24094.72 | 25726.44 |
| 29653.05 | 23116.03 | 52144.68 | 42296.06 | 40979.37 | 31582.75 | 38441.7  | 33576.47 | 38577.64 | 29053.97 | 42291.83 | 37251.28 | 25878.59 | 24035.31 | 21946.41 | 25353.82 |

|          |          |          |          |          |          |          |          |          |          |          |          |          |          |          |          |
|----------|----------|----------|----------|----------|----------|----------|----------|----------|----------|----------|----------|----------|----------|----------|----------|
| 29653.05 | 23116.03 | 52144.68 | 41945.51 | 34733.19 | 29748.66 | 36412.65 | 32065.5  | 35123.57 | 26718.42 | 41387.78 | 35397.92 | 25878.59 | 23692.22 | 21946.41 | 25353.82 |
| 34836.65 | 36733.24 | 47616.49 | 42794.86 | 43797.32 | 36305.61 | 42525.44 | 48234.75 | 38154.75 | 59103.28 | 60224.59 | 51887.37 | 27112.93 | 24785.76 | 23431.68 | 25903.01 |
| 20931.38 | 20737.3  | 36370.22 | 40629.82 | 16471.07 | 24859.14 | 55049.1  | 46566.29 | 63115.09 | 50354.69 | 40308.23 | 46437.58 | 18321.74 | 22179.46 | 12545.59 | 24388.87 |
| 29455.25 | 24552.9  | 50243.4  | 40485.94 | 38151.7  | 29358.27 | 38634.7  | 36739.39 | 39982.52 | 43073.4  | 45857.04 | 38422.38 | 25586.52 | 23975.78 | 22574.41 | 26518.9  |
| 29154.39 | 23157.97 | 50916.03 | 39570.58 | 39722.33 | 31862.54 | 38736.52 | 32998.72 | 39869.28 | 44359.69 | 43955.33 | 40765.4  | 24201.75 | 23731.66 | 21565.1  | 26870.73 |
| 33175.58 | 25997.17 | 52818.7  | 37937.52 | 39916.21 | 32460.63 | 30928.64 | 36289.7  | 30749.91 | 33119.08 | 52248.17 | 43482.49 | 24102.55 | 18574.76 | 20691.48 | 27870.15 |
| 27155.03 | 25601.81 | 44859.84 | 40440.39 | 37052.32 | 27914.99 | 38880.1  | 39602.04 | 41867.72 | 44387.96 | 51499.56 | 44062.47 | 23233.89 | 23081.02 | 21491.82 | 25155.97 |
| 30954.18 | 28497.65 | 33966.44 | 41245.72 | 39326.24 | 36488.27 | 31533.44 | 37604.89 | 28686.72 | 31050.78 | 50759.12 | 39559.36 | 22957.73 | 22605.68 | 19827.96 | 23060.04 |
| 28259.27 | 23856.39 | 49839.11 | 37788.25 | 40245.67 | 31445.42 | 36364.31 | 36334.22 | 38075.48 | 34117.45 | 41180.42 | 41871    | 23881.61 | 21689.97 | 20755.24 | 21146.08 |
| 30989.92 | 22972.37 | 33816.62 | 39510.45 | 40014.03 | 33716.5  | 32480.77 | 28089.79 | 27583.39 | 27785.28 | 42846.53 | 38091.71 | 23359.87 | 22513.25 | 19073.45 | 22058.96 |
| 26866.35 | 25923.11 | 44670.35 | 34543.39 | 39459.87 | 28871.83 | 41958.82 | 44494.56 | 42136.02 | 45077.13 | 49467.71 | 49355.99 | 24697.67 | 24965.64 | 23077.67 | 24553.24 |
| 25633.72 | 20016.42 | 40974.22 | 39232.92 | 30760.56 | 29328.29 | 35288.07 | 32227.39 | 33116.11 | 27972.46 | 42837.68 | 39874.43 | 25066.38 | 21346.77 | 25357.5  | 22133.82 |
| 30872.71 | 27147.47 | 38899.4  | 35974.82 | 40330.82 | 31748.73 | 41531.17 | 40907.52 | 42476.62 | 38926.74 | 50050.35 | 45046.9  | 26864.36 | 25330.88 | 24176.27 | 25125.74 |
| 28757.37 | 23550.77 | 50171.36 | 39014.7  | 40018.8  | 30756.33 | 35059.72 | 32959.24 | 35487.73 | 29404.55 | 39527.16 | 38066.01 | 24165.23 | 21900.5  | 21201.35 | 22140.96 |
| 30669.86 | 22761.6  | 31046.13 | 38214.09 | 39551.42 | 33212.73 | 31586.65 | 27592.91 | 25980.31 | 22617.78 | 41930.87 | 37175.08 | 22585.61 | 22040.94 | 17792.33 | 21279.25 |
| 28131.5  | 28886.99 | 42282.84 | 42258.76 | 42542.15 | 33080.51 | 45343.95 | 41839.24 | 43097.35 | 53182.99 | 59567.19 | 57081.1  | 25030.82 | 23233.49 | 18523.74 | 21200.02 |
| 17055.12 | 19519.23 | 38375.88 | 42187.25 | 16801.54 | 29041.87 | 32032.73 | 32055.36 | 40976.51 | 39819.06 | 38894.96 | 42445.31 | 21696.59 | 18452.8  | 21526.28 | 24422.63 |
| 29339.15 | 27505.66 | 30275.7  | 38610.05 | 37843.2  | 34628.68 | 31424.59 | 47472.48 | 33213.01 | 59021.54 | 51030.48 | 48210.56 | 21300.39 | 20841.32 | 17885.71 | 21202.48 |
| 24843.23 | 24568.31 | 39799.57 | 37993.08 | 32117.13 | 28848.92 | 36177.16 | 39019.85 | 36235.98 | 42783.77 | 49782.83 | 47834.01 | 23343.98 | 19386.26 | 15464.87 | 23848.42 |
| 24067.1  | 19740.46 | 42386.04 | 32820.98 | 32163.33 | 23607.99 | 29956.4  | 28784.85 | 31579.26 | 20001.58 | 37015.41 | 32654.71 | 19764.14 | 17148.33 | 15605.16 | 19932.33 |
| 32198.94 | 26185.68 | 47124.19 | 35028.11 | 40194.78 | 31583.7  | 27755.02 | 35352.6  | 27700.38 | 34674.25 | 51476.64 | 43330.74 | 22216.31 | 17068.29 | 18276.27 | 26047.43 |
| 26987.95 | 28466.79 | 38948.02 | 40117.18 | 41674.08 | 31790.03 | 42868.27 | 38583.51 | 39993.02 | 51358.67 | 57081.01 | 54752.17 | 23871.84 | 21800.14 | 17177.74 | 20214.23 |
| 26128.22 | 21935.95 | 43426.87 | 37816.74 | 32681.3  | 26109.48 | 35025.34 | 32747.51 | 36957.22 | 38471.04 | 42496.52 | 34102.31 | 21931.53 | 21158.33 | 17743.89 | 23286.79 |
| 23041.78 | 19836.86 | 39588.54 | 36034.45 | 37668.43 | 29364.99 | 27719.25 | 25481.57 | 26794.7  | 21113.99 | 38590.59 | 30585.96 | 21975.22 | 13444.44 | 23812.35 | 17578.48 |
| 27982.05 | 23038.84 | 42495.34 | 34285.09 | 34786.46 | 25570.86 | 31409.76 | 33575.87 | 30563.57 | 31240.55 | 44824.74 | 41529.06 | 21104.5  | 19147.43 | 17295.91 | 23761.85 |
| 16111.96 | 20417.92 | 37073.96 | 34855.56 | 30316.45 | 28549.5  | 34346.85 | 44221.86 | 31918.02 | 49153.56 | 45538.05 | 44358.47 | 18858.87 | 16753.79 | 13478.22 | 21717.32 |
| 30396.77 | 24778.94 | 44164.45 | 32024.94 | 37686.57 | 29540.6  | 24672.43 | 33285.81 | 24535.12 | 32524.9  | 49655.63 | 40101.99 | 20413.45 | 15080.2  | 16537.37 | 24577.35 |
| 25463.57 | 19962.46 | 35252.5  | 34275.01 | 32196.44 | 29918.72 | 32281.56 | 27711.86 | 30592.32 | 28391.58 | 33623.8  | 33706.63 | 20528.05 | 18871.61 | 17809.95 | 21410.87 |
| 24676.59 | 26272.84 | 33995.74 | 36777.55 | 40145.09 | 29124.47 | 40168.07 | 34157.43 | 36317.47 | 48431.1  | 53429.05 | 50830.84 | 21805.89 | 19433.93 | 15045.85 | 17964.9  |
| 25770.89 | 25569.05 | 48412.91 | 33498.77 | 25842.24 | 25567.5  | 34942.42 | 36810.58 | 32752.6  | 33698.13 | 38509.34 | 39305.85 | 18557.58 | 20756.5  | 10975.35 | 19604.63 |
| 27363.11 | 31518.79 | 47664.84 | 30364.31 | 31622.63 | 24110.15 | 46238.18 | 51871.57 | 46305    | 50602.93 | 53061.98 | 52979.52 | 21833.76 | 27065.99 | 15881.26 | 25210.3  |
| 20938.25 | 14831.01 | 28463.85 | 32765.86 | 25936.05 | 27732.11 | 15923.53 | 27047.16 | 21273.17 | 16694.2  | 27331.25 | 26536.27 | 19338.11 | 11276.62 | 20077.4  | 17610.88 |
| 20576.62 | 24414.35 | 38344.66 | 27931.84 | 17122.27 | 14041.34 | 39699.96 | 31571.1  | 47204.48 | 48462.23 | 37350    | 45602.59 | 18088.62 | 19751.46 | 15146.79 | 21370.39 |
| 28680.35 | 24419.4  | 40009.16 | 26836.74 | 33939.78 | 26753.23 | 20248.84 | 33271.61 | 19950.94 | 32671.69 | 52179.11 | 37518.98 | 17476.47 | 12114.87 | 13647.97 | 23195.18 |
| 28680.35 | 24419.4  | 40009.16 | 26836.74 | 33939.78 | 26753.23 | 20248.84 | 33271.61 | 19950.94 | 32671.69 | 52179.11 | 37518.98 | 17476.47 | 12114.87 | 13647.97 | 23195.18 |

|          |          |          |          |          |          |          |          |          |          |          |          |          |          |          |          |
|----------|----------|----------|----------|----------|----------|----------|----------|----------|----------|----------|----------|----------|----------|----------|----------|
| 27776.49 | 22531.3  | 38053.3  | 32742.94 | 35831.57 | 27382.41 | 30711.83 | 28510.76 | 31981.6  | 28752.74 | 41875.8  | 38066.59 | 12566.83 | 14295.11 | 11522.83 | 16509.67 |
| 22196.9  | 19836.67 | 33270.77 | 33745.76 | 32129.67 | 30173.86 | 21958.22 | 23932.64 | 19915.84 | 27291.15 | 41847.01 | 34745.11 | 13729.31 | 10650.46 | 14798.72 | 15639.02 |
| 13750.37 | 17184.47 | 23619.43 | 25791.07 | 16529.97 | 28214.26 | 18033.76 | 30101.09 | 18445.43 | 38013.24 | 31046.1  | 31888.42 | 12293.96 | 13737.88 | 10920.22 | 15391.73 |
| 28110.6  | 23459.29 | 37388.53 | 31805.93 | 35460.18 | 26857.5  | 30543.56 | 28952.99 | 31870.5  | 34255.88 | 42815.93 | 39187.5  | 11719.1  | 13655.39 | 10667.84 | 15769.84 |
| 21431.1  | 25067.55 | 36265.33 | 27108.15 | 16893.11 | 17300.03 | 34730.94 | 36143.31 | 32121.37 | 44617.89 | 46716.53 | 44973.34 | 15355.35 | 20032.71 | 12300.21 | 15380.03 |
| 19976.92 | 22360.4  | 22835.23 | 29317.33 | 16322.07 | 19160.99 | 42749.57 | 38530.06 | 48068.62 | 52689.91 | 40398.13 | 46528.89 | 16673.43 | 18750.18 | 11843.93 | 18507.98 |
| 15483.74 | 16069.01 | 31137.6  | 29193.52 | 27374.74 | 20858.55 | 26326.65 | 22946.98 | 24059.6  | 23636.79 | 29839.45 | 27903.46 | 16086.18 | 14972.58 | 13479.41 | 15794.33 |
| 11380.15 | 18734.58 | 20415.96 | 29991.31 | 3741.23  | 17002.32 | 34074.45 | 38180.71 | 34813.75 | 43624.88 | 42093.55 | 49394.06 | 11531.77 | 11548.62 | 15285.58 | 12832.31 |
| 23356.73 | 27467.28 | 25783.38 | 29692.81 | 26642.27 | 25552.56 | 17597.64 | 16904.18 | 10631.52 | 14044.38 | 28634.45 | 16979.61 | 12263.81 | 13481.79 | 8039.337 | 12723.39 |
| 16087.03 | 18777.01 | 41451.7  | 23913.69 | 13276.25 | 14492.16 | 35758.38 | 33041.77 | 40107.32 | 34922.1  | 33201.23 | 43488.5  | 14625.01 | 20438.13 | 15286.73 | 14642.95 |
| 18394.58 | 20427.48 | 41314.8  | 27373.2  | 24179.2  | 14897.79 | 36371.59 | 33262.57 | 39899.53 | 37866.12 | 30841.63 | 37051.76 | 12786.7  | 20094.52 | 8135.555 | 16314.75 |
| 23746.04 | 23603.46 | 30884.16 | 31885.4  | 28727.37 | 26851.73 | 34633.64 | 41152.74 | 36290.14 | 41311.24 | 45047.33 | 43656.19 | 9073.534 | 10644.84 | 12181.65 | 12751.73 |
| 12634.6  | 5377.004 | 21732.49 | 26270.74 | 18225.84 | 24447.98 | 14539.8  | 16077.15 | 9890.536 | 4898.324 | 23737.91 | 16519.97 | 12348.97 | 11054.17 | 8445.003 | 12573.1  |
| 15568.38 | 7648.629 | 27853.8  | 21263.25 | 20845.2  | 20739.43 | 16871.43 | 25457.85 | 19842.1  | 17988.81 | 29530.92 | 27627.32 | 14180.65 | 11036.75 | 13658.78 | 17742.57 |
| 23549.01 | 22590.38 | 28998    | 31187.04 | 28717.57 | 27022.21 | 33397.85 | 39277.29 | 33905.27 | 37372.76 | 43390.84 | 42390.64 | 8771.34  | 10382.98 | 11327.19 | 12643.84 |
| 15752.68 | 10676.07 | 31370.7  | 18788.73 | 21234.43 | 14785.84 | 20427.4  | 30459.32 | 25956.69 | 20972.45 | 24306.22 | 29296.56 | 10874.28 | 12079.19 | 7506.87  | 16421.52 |
| 12380.5  | 13324.21 | 32629.57 | 28001.45 | 23602.18 | 17559.9  | 25235.14 | 21062.36 | 26211.85 | 24272.96 | 26691.23 | 24946.93 | 14268.13 | 12642.15 | 10902.19 | 15784.12 |
| 17830.53 | 20180.34 | 32871.18 | 27076.91 | 22463.17 | 14779.5  | 35583.64 | 32989.36 | 38174.14 | 37542.41 | 30673.2  | 36210.27 | 10581.77 | 19914.01 | 7087.667 | 14780.19 |
| 17063.71 | 21431.73 | 37625.58 | 26941.08 | 22621.04 | 18618.73 | 27521.31 | 29546.54 | 27677.03 | 39452.19 | 27977.87 | 36298.02 | 13379.17 | 17466.77 | 8629.883 | 16411.33 |
| 16436.15 | 20175.55 | 38839.25 | 24292.47 | 22368.62 | 13425.68 | 35123.3  | 31903.19 | 39714.94 | 40071.68 | 29315.57 | 37127.43 | 11864.04 | 18686.74 | 7008.875 | 16052.52 |
| 12865.84 | 37812.23 | 30182.16 | 32674.88 | 30300.61 | 34584.3  | 18150.02 | 17939.56 | 28247.77 | 32252.29 | 44483.27 | 37953.18 | 9052.206 | 9483.374 | 6006.669 | 16066.25 |
| 9118.312 | 14956.55 | 18496.91 | 26264.28 | 14217.48 | 19211.24 | 24017.1  | 17555.01 | 22374.89 | 27536.51 | 30535.05 | 30261.23 | 16558.21 | 12048.02 | 16600.13 | 10436.73 |
| 18725.4  | 19730.64 | 40645.9  | 23340.13 | 27370.84 | 13126.79 | 21068.47 | 25993.19 | 21102.89 | 29084.52 | 39992.92 | 30753.54 | 12721.76 | 12005.26 | 12086.17 | 16704.14 |
| 7023.765 | 10301.06 | 19371.86 | 25706.77 | 11912.65 | 16446.35 | 18825.46 | 15378.91 | 19525.08 | 10916.06 | 22199.15 | 20462.74 | 15094.54 | 9714.628 | 16962.14 | 9167.125 |
| 15136.22 | 18606.49 | 26257.31 | 24335.91 | 17659.04 | 15074.54 | 28114.44 | 26600.48 | 31550.41 | 35291.74 | 34623.85 | 37039.61 | 9221.267 | 10969.44 | 10232.93 | 12794.24 |
| 17331.18 | 19501.36 | 13052.44 | 27111.8  | 27240.16 | 24024.35 | 21135.99 | 17046.1  | 17831.21 | 30505.38 | 36467.6  | 29169.33 | 17396.32 | 12918.52 | 12822.47 | 11464.19 |
| 10386.91 | 4334.202 | 25982.92 | 15544.39 | 15320.21 | 13551.92 | 16301.94 | 28348.64 | 21122.04 | 18300.86 | 21254.3  | 25484.24 | 9600.504 | 9533.488 | 6836.615 | 15434.6  |
| 24072.47 | 34514.5  | 39125.31 | 22431.51 | 28787.22 | 17515.92 | 43816.43 | 55224.17 | 44423.17 | 72891.15 | 60524.04 | 61766.29 | 16010.05 | 24700.7  | 10045.33 | 21120.79 |
| 14666.62 | 24300.9  | 35587.09 | 22929.46 | 18531.29 | 13078.37 | 29309.38 | 28245.28 | 34620.24 | 38328.66 | 26531.38 | 36654.75 | 10800.37 | 16315.91 | 6044.771 | 14875.75 |
| 17848.24 | 22030.62 | 27131.92 | 20813.89 | 21856.69 | 16130.46 | 29642.5  | 36829.77 | 30782.45 | 42910.62 | 42117.29 | 40512.74 | 9953.801 | 15622.85 | 6571.663 | 16886.74 |
| 6273.839 | 19240.39 | 18119    | 21707.14 | 10158.7  | 19472    | 23310.67 | 25459.61 | 18584.72 | 30563.84 | 30975.49 | 31578.03 | 8217.856 | 7689.414 | 7648.72  | 8369.545 |
| 11075.8  | 10085.5  | 19861.93 | 16900.57 | 15195.08 | 14964.43 | 20906.52 | 18254.99 | 20330.27 | 20267.76 | 24808.81 | 34586.17 | 8534.036 | 10680.73 | 6471.493 | 9275.43  |
| 15947.63 | 18567.19 | 10340.11 | 27566.69 | 31049.59 | 24420.04 | 18942.85 | 24399.73 | 16904.35 | 27811.44 | 32756.61 | 25347.16 | 17575.94 | 12402.02 | 12235.49 | 9728.606 |
| 22028.36 | 27589.93 | 29298.61 | 19526.22 | 24891.59 | 17667.74 | 30172.32 | 43004.12 | 32145.11 | 53638.9  | 51577.64 | 49720.27 | 12320.91 | 18357.85 | 7319.341 | 16632.14 |
| 6563.129 | 15615.34 | 14243.51 | 24120.4  | 2228.584 | 12226.59 | 28392.99 | 31305.43 | 31022.67 | 42183.25 | 37365.8  | 41553.54 | 7667.513 | 7622.132 | 10893.94 | 8609.584 |

|          |          |          |          |          |          |          |          |          |          |          |          |          |          |          |          |
|----------|----------|----------|----------|----------|----------|----------|----------|----------|----------|----------|----------|----------|----------|----------|----------|
| 6563.129 | 15615.34 | 14243.51 | 24120.4  | 2228.584 | 12226.59 | 28392.99 | 31304.18 | 31022.67 | 42174    | 37337.22 | 41546.08 | 7667.513 | 7622.132 | 10892.35 | 8609.584 |
| 12994.48 | 6146.058 | 24303.72 | 18909.9  | 16137.16 | 19114.59 | 13562.62 | 22934.17 | 15131.4  | 12393.33 | 25790.33 | 22159.26 | 8509.899 | 8823.791 | 7786.146 | 12200.24 |
| 12006.03 | 20363.92 | 38418.88 | 18241.57 | 5230.478 | 11119.6  | 26061.49 | 28742.68 | 26698.68 | 25870.99 | 37055.31 | 37195.59 | 12580.3  | 10685.67 | 15216.46 | 11840.39 |
| 23826.88 | 36169.11 | 34258.25 | 17553.93 | 26442.79 | 15241.84 | 44830.92 | 58888.64 | 49833.89 | 83910.07 | 61324.58 | 66101.45 | 12998.82 | 24587.19 | 7632.376 | 18170.73 |
| 14087.71 | 9361.1   | 24406.08 | 15178.64 | 19055.81 | 11740.54 | 9743.814 | 20755.4  | 9987.192 | 6153.142 | 19229.3  | 17990.05 | 3691.998 | 10657.36 | 2279.674 | 14013.33 |
| 17453.05 | 18243.76 | 5143.957 | 22408.72 | 5374.705 | 19413.96 | 18610.76 | 24619.97 | 16987.38 | 28632.84 | 33332.4  | 28400.42 | 3322.526 | 4066.506 | 2729.503 | 6924.081 |
| 17453.05 | 18243.76 | 5143.957 | 22408.72 | 5374.705 | 19413.96 | 18610.76 | 24619.97 | 16987.38 | 28632.84 | 33332.4  | 28400.42 | 3322.526 | 4066.506 | 2729.503 | 6924.081 |
| 7814.136 | 16297.92 | 12777.91 | 12308.06 | 11086.73 | 13582.03 | 19320.02 | 15302.25 | 17387.13 | 35242.17 | 31572.13 | 32109.77 | 3620.113 | 5077.948 | 2614.148 | 8841.319 |
| 5433.031 | 13159.42 | 5515.494 | 25845.79 | 11675.73 | 23856.06 | 11173.6  | 21273.1  | 15065.82 | 16377.71 | 16663.18 | 10893.04 | 1472.154 | 4589.818 | 1499.506 | 10403.7  |
| 13158.34 | 16325.37 | 17756.24 | 20376.1  | 6821.376 | 7556.98  | 26585.46 | 23722.57 | 28079.53 | 31540.27 | 31496.13 | 36667.72 | 11420.1  | 13872.71 | 9999.17  | 11948.75 |
| 20327.11 | 16779.65 | 12750.2  | 24599.94 | 34067.45 | 21221.86 | 11217.9  | 4669.794 | 9767.008 | 7383.908 | 30206.92 | 20737.47 | 11277.83 | 13964.88 | 10321.17 | 12491.84 |
| 15217.62 | 31275.35 | 45768.25 | 18493.63 | 6573.209 | 10762.56 | 44159.24 | 51930.01 | 46158.59 | 56449.87 | 55250.01 | 54612.47 | 15877.27 | 23952.82 | 8753.354 | 18107.11 |
| 21995.44 | 17765.87 | 34061.97 | 23897.01 | 34469.87 | 9943.795 | 26588.54 | 25301.6  | 27676.58 | 12780.88 | 39788.62 | 30638.94 | 9803.254 | 14709.55 | 9987.426 | 16697.81 |
| 11467.42 | 16707.15 | 17744.3  | 13751.98 | 13485.6  | 14904.73 | 12690.08 | 20757.87 | 14358.75 | 25738.56 | 24436.27 | 25985.68 | 6086.591 | 6326.581 | 5548.204 | 9275.471 |
| 10761.6  | 13288.03 | 16130.32 | 12727.21 | 6930.986 | 9983.482 | 22108.05 | 21637.35 | 22645.25 | 23889.6  | 29063.67 | 36799.18 | 9046.933 | 11194.97 | 8237.218 | 9419.462 |
| 14861.91 | 11229.44 | 7049.293 | 18585.46 | 14938.07 | 12914.61 | 20114.86 | 14104.19 | 18589.62 | 18782.21 | 17592.71 | 37564.89 | 8212.945 | 6613.662 | 5216.196 | 8658.257 |
| 11234.43 | 12630.83 | 3898.453 | 16912.33 | 4010.103 | 11456.53 | 15865.94 | 10694.86 | 11522.82 | 19627.25 | 8376.473 | 18587.76 | 3034.255 | 14468.54 | 1861.51  | 4299.606 |
| 5943.376 | 15393.09 | 8459.452 | 21633.24 | 8448.355 | 14098.99 | 29725.26 | 25162.25 | 20228.67 | 22700.46 | 16019.06 | 19722.02 | 6555.468 | 9693.229 | 4959.214 | 6166.096 |
| 15169.26 | 22144.49 | 17223.6  | 13163.21 | 7985.572 | 19594.58 | 25028.34 | 34106.29 | 23156.96 | 34766.22 | 43237.56 | 35902.43 | 4863.724 | 12976.54 | 2100.876 | 15551.69 |
| 15875.6  | 26942.53 | 17192.95 | 13030.92 | 7688.094 | 20222.58 | 30467.66 | 40751.29 | 29186.14 | 40600.4  | 46662    | 42701.63 | 4640.112 | 15310.2  | 1969.184 | 16234.29 |
| 11109.4  | 20329    | 16609.84 | 17275.36 | 11932.97 | 14724.74 | 28772.35 | 32564.59 | 27713.6  | 37672.91 | 37671.16 | 39444.34 | 5814.388 | 8260.371 | 4549.836 | 10939.79 |
| 14510.33 | 22331.85 | 15756.11 | 12045.29 | 7003.597 | 18857.12 | 25865.63 | 34585.3  | 23684.23 | 35696.16 | 43689.46 | 37627.43 | 4288.898 | 13037.01 | 1808.746 | 15449.35 |
| 8408.25  | 22182.65 | 9413.082 | 12469.02 | 9807.488 | 10097.29 | 19027.97 | 20227    | 17746.45 | 36714.55 | 31445.95 | 34494.01 | 3638.146 | 4989.783 | 3977.59  | 8222.107 |
| 8798.211 | 12812.94 | 13375.16 | 13600.18 | 4940.656 | 6235.19  | 25943.5  | 25927.37 | 31889.43 | 36297.39 | 29898.93 | 42453.09 | 9937.077 | 13139.54 | 8859.6   | 11435.5  |
| 14842.47 | 26250.01 | 16323.87 | 11859.48 | 6892.977 | 18881.41 | 30007.28 | 39460.65 | 28556.49 | 38071.26 | 45541.74 | 41619.61 | 4175.101 | 14633.37 | 1748.389 | 15725.62 |
| 20309.62 | 21896.13 | 16571.42 | 18693.82 | 25655.76 | 17492.29 | 32645.92 | 33997.65 | 32388.09 | 36845.56 | 38023.29 | 37638.89 | 8216.354 | 11782.43 | 9659.185 | 12272.44 |
| 7774.435 | 16027.24 | 32674.69 | 11535.4  | 2766.616 | 6589.749 | 24130.28 | 28529.64 | 28305.38 | 37177.82 | 30996.19 | 42831.25 | 7879.794 | 6609.166 | 10000.05 | 7648.114 |
| 9161.291 | 9814.787 | 10364.8  | 11417.29 | 5670.06  | 5527.381 | 18053.69 | 17130.33 | 18462.15 | 16363.54 | 21350.3  | 32056.67 | 6916.312 | 10254.32 | 6552     | 6906.618 |
| 26169.09 | 23924.54 | 13657.37 | 20405.03 | 33646.47 | 19729.37 | 27944.39 | 27950.88 | 25067.17 | 32686.01 | 38593.8  | 31317.32 | 14884.9  | 15634.4  | 16236.02 | 9189.501 |
| 3017.456 | 13600.57 | 3881.656 | 7763.785 | 2570.612 | 5947.955 | 17185.6  | 19067.18 | 16313.59 | 28550.79 | 25313.61 | 30899.61 | 1889.792 | 4370.748 | 2161.802 | 5700.049 |
| 15589.13 | 21065.09 | 29294.06 | 10461.34 | 14393.96 | 6191.771 | 26952.25 | 33553.11 | 31615.53 | 43596.18 | 46913.26 | 34509.47 | 5960.563 | 12652.45 | 3993.603 | 14725.71 |
| 9699.168 | 15907.78 | 16277.33 | 15449.22 | 4617.609 | 2534.513 | 17824.07 | 10740.19 | 20339.31 | 27662.38 | 19370.16 | 22333.39 | 9911.318 | 8602.305 | 7574.732 | 9000.204 |
| 9699.168 | 15907.78 | 16277.33 | 15449.22 | 4617.609 | 2534.513 | 17824.07 | 13988.93 | 20339.31 | 27662.38 | 19370.16 | 22333.39 | 9911.318 | 8602.305 | 7574.732 | 9000.204 |
| 13635.96 | 23961.64 | 15053.86 | 10699.59 | 6065.944 | 17800.73 | 28988.65 | 37466.96 | 26687.31 | 33499.24 | 42986.32 | 38954.98 | 3663.671 | 13608.57 | 1505.82  | 15285.14 |
| 13657.43 | 25380.2  | 15293.15 | 10590.12 | 6057.652 | 17347.43 | 29414.64 | 37864.37 | 27758.05 | 35151.64 | 44129.15 | 40259.43 | 3682.98  | 13818.84 | 1520.999 | 15095    |

|          |          |          |          |          |          |          |          |          |          |          |          |          |          |          |          |
|----------|----------|----------|----------|----------|----------|----------|----------|----------|----------|----------|----------|----------|----------|----------|----------|
| 3464.41  | 9436.42  | 17586.18 | 4373.423 | 11875.31 | 5820.286 | 16363.35 | 17970.35 | 20573.99 | 25176.38 | 21761.59 | 28100.8  | 3039.781 | 4889.882 | 2265.057 | 4876.383 |
| 13658.62 | 25571.49 | 14897.53 | 10602.71 | 6068.936 | 17620.18 | 28866.87 | 38295.27 | 27094.91 | 36217.16 | 44006.93 | 40028.63 | 3668.83  | 13690.19 | 1516.131 | 14872.89 |
| 7693.793 | 3521.944 | 13461    | 10425.46 | 8920.02  | 11804.23 | 8202.774 | 15772.43 | 10277.06 | 10244.75 | 18100.64 | 16993.56 | 3920.927 | 4473.046 | 3512.325 | 6325.396 |
| 7129.599 | 6694.054 | 12127.79 | 6270.556 | 2955.077 | 6717.523 | 18672.01 | 22362.89 | 19935.13 | 34477.35 | 31943.98 | 25476.4  | 7261.376 | 9581.642 | 9455.047 | 7571.73  |
| 12983.88 | 19841.38 | 7342.89  | 11592.86 | 11585.8  | 8242.396 | 18509.03 | 18261.18 | 20271.92 | 39504.59 | 27506.97 | 32464.74 | 9867.548 | 9638.14  | 7756.927 | 7322.188 |
| 2853.158 | 3248.037 | 2155.465 | 14400.72 | 7620.099 | 12148.88 | 10506.8  | 277.4271 | 5730.295 | 68.93136 | 1536.663 | 12376.97 | 1528.033 | 4550.015 | 1305.092 | 4965.241 |
| 4819.61  | 9360.167 | 17682.67 | 7995.123 | 3555.808 | 3392.446 | 10549.03 | 8361.708 | 11854.71 | 17294.46 | 14053.95 | 16784.45 | 5514.772 | 6585.548 | 5327.21  | 4791.129 |
| 8232.243 | 8909.779 | 7554.158 | 9940.173 | 4689.501 | 4513.801 | 13901.57 | 3406.178 | 9778.81  | 6180.939 | 16561.1  | 19971.08 | 5076.482 | 7220.178 | 4993.674 | 4974.165 |
| 2824.475 | 12177.47 | 4501.078 | 4089.477 | 2772.888 | 8079.512 | 15853.53 | 23768.42 | 14822.88 | 30334.09 | 22532.52 | 26982.34 | 4182.731 | 5963.362 | 3631.206 | 5319.065 |
| 10141.71 | 13160.85 | 26189.31 | 8386.304 | 19090.84 | 8428.216 | 15447.9  | 15158.37 | 14807.26 | 20205.06 | 25389.14 | 21585.21 | 7525.462 | 8667.517 | 7107.319 | 6781.551 |
| 7198.76  | 16379.76 | 31020.99 | 10332.91 | 5732.392 | 4793.564 | 21829.65 | 20975.85 | 17200.1  | 27366.88 | 25369.25 | 24487.25 | 8054.334 | 7789.871 | 10905.23 | 7428.159 |
| 10485.1  | 15013.03 | 12452.03 | 14389.11 | 17201    | 13693.64 | 19594.7  | 22963.73 | 21337.89 | 29782.1  | 26138.91 | 29249.83 | 4927.276 | 7490.354 | 3399.407 | 7686.179 |
| 4567.697 | 21361.83 | 9361.168 | 4976.997 | 4988.929 | 13935.36 | 33099.59 | 37735.3  | 40611.86 | 35527.85 | 28271.4  | 53016.26 | 7713.776 | 11021.79 | 2764.086 | 10031.71 |
| 5047.616 | 2641.087 | 5788.873 | 10284.19 | 6426.847 | 9053.169 | 13495.93 | 10231.4  | 14975.66 | 12862.46 | 12406.19 | 18621.7  | 4071.687 | 6805.115 | 1648.541 | 4042.485 |
| 9761.276 | 1192.368 | 14807.35 | 3002.511 | 5401.104 | 18243.52 | 29685.69 | 38913.59 | 28701.35 | 38144.65 | 43238.36 | 41699.23 | 4756.299 | 13187.27 | 2024.085 | 13875.7  |
| 3902.236 | 17390.85 | 2651.991 | 651.3065 | 794.3893 | 5400.582 | 15563.9  | 21156.38 | 17100.7  | 25316.7  | 20523.86 | 24809.01 | 1511.799 | 3893.554 | 2438.252 | 3007.41  |
| 1605.042 | 4677.405 | 2912.658 | 452.914  | 0        | 1229.022 | 7772.697 | 9305.591 | 5821.583 | 13181.03 | 13856.16 | 13037.08 | 814.4811 | 310.5949 | 2542.049 | 505.4372 |
| 18955.57 | 14496.56 | 10382.13 | 12217.04 | 23239.55 | 11856.18 | 16754.1  | 20565.62 | 17676.55 | 26014.17 | 23865.95 | 25477.18 | 4388.13  | 7787.378 | 2718.766 | 6958.13  |
| 3704.149 | 6590.869 | 2651.935 | 647.7919 | 778.6095 | 4735.214 | 13226.53 | 13019.07 | 15475.67 | 12449.9  | 11565.9  | 11905.74 | 1473.893 | 3587.859 | 2252.555 | 2773.242 |
| 2297.811 | 3569.668 | 7849.606 | 1707.729 | 1941.222 | 2680.75  | 6355.341 | 7657.188 | 4593.959 | 10923.27 | 11058.82 | 10772.92 | 1942.677 | 8087.772 | 1962.794 | 3207.471 |
| 3994.644 | 1983.619 | 4924.623 | 7567.994 | 4635.151 | 6717.278 | 11176.36 | 8487.332 | 12929.85 | 13064.7  | 10584.04 | 16748.17 | 3291.827 | 5419.737 | 1200.269 | 3059.442 |
| 7462.533 | 16791.17 | 9406.268 | 16474.8  | 10128.25 | 6484.537 | 19991.66 | 25314.54 | 20773.75 | 23581.85 | 30742.43 | 35880.62 | 6294.036 | 11545.09 | 7648.251 | 8334.075 |
| 9825.132 | 11542.54 | 6660.388 | 6271.269 | 5055.841 | 5737.436 | 21204.7  | 33706.98 | 17443.33 | 34174.88 | 18312.16 | 19269.18 | 2497.622 | 8098.453 | 1493.276 | 6035.063 |
| 3452.378 | 7389.025 | 11737.68 | 3306.258 | 5920.714 | 11619.1  | 24412.14 | 31712.24 | 26874.58 | 36436.38 | 27444.2  | 39140.29 | 6331.438 | 12078.68 | 576.1262 | 11935.66 |
| 5711.643 | 2834.93  | 6867.768 | 15098.39 | 19296.53 | 16860.63 | 22026.78 | 22236.91 | 25209.94 | 16800.49 | 25973.69 | 27360.34 | 15030.98 | 11370.35 | 7027.56  | 14346.8  |
| 1892.697 | 12080.98 | 3158.152 | 4923.031 | 586.3385 | 5106.768 | 18348.68 | 22744.8  | 17831.29 | 31008.65 | 26030.68 | 25504.74 | 3012.933 | 3771.457 | 1927.934 | 4474.641 |
| 7151.3   | 954.196  | 7349.132 | 6354.859 | 16840.76 | 8105.347 | 12315.73 | 1907.351 | 14236.48 | 915.4761 | 5923.617 | 2198.955 | 2775.367 | 2346.953 | 762.1039 | 6231.889 |
| 1452.328 | 11042.49 | 2264.942 | 1989.605 | 1370.909 | 4395.641 | 13688.33 | 19035.64 | 11597.53 | 26213.13 | 17228.63 | 22485.96 | 2422.14  | 3912.776 | 2179.149 | 3135.365 |
| 2548.954 | 9143.161 | 13547.22 | 6711.847 | 10012.3  | 8470.107 | 8551.16  | 9194.74  | 7680.672 | 15849.15 | 15695.55 | 14070.59 | 1152.437 | 1337.561 | 2705.252 | 2676.733 |
| 11213.03 | 20287.7  | 4569.663 | 2455.6   | 635.7355 | 3827.41  | 25660.65 | 22788.27 | 16175.01 | 23185.09 | 31562.53 | 20376.03 | 5038.08  | 12297.15 | 2354.518 | 3141.386 |
| 3091.371 | 13343.86 | 6136.203 | 3734.556 | 1447.791 | 6272.62  | 23724.09 | 27674.47 | 26187.54 | 30547.93 | 28363.6  | 34845.2  | 4984.6   | 5356.892 | 3982.188 | 6932.131 |
| 3208.293 | 10117.72 | 7221.801 | 3046.065 | 2369.439 | 5893.991 | 10715.39 | 3751.043 | 10162.41 | 14557.15 | 14732.88 | 16017.14 | 4667.501 | 5846.955 | 1303.051 | 5322.115 |
| 3945.067 | 681.2379 | 10782.07 | 4388.604 | 908.5644 | 1872.22  | 4944.778 | 4248.135 | 1583.117 | 2291.452 | 11444.92 | 2735.536 | 4900.6   | 1529.529 | 2281.798 | 3975.484 |
| 2583.214 | 7399.456 | 3960.791 | 1150.364 | 195.6369 | 2021.6   | 11439.53 | 13831.22 | 9066.952 | 18239.69 | 18121.23 | 17830.42 | 2345.691 | 1947.567 | 504.1749 | 3930.714 |
| 6745.858 | 21174    | 17604.4  | 3178.844 | 1854.078 | 4372.254 | 25977.9  | 37148.47 | 23928.49 | 68700.1  | 39379.42 | 31379.48 | 5750.44  | 7622.241 | 159.4299 | 7902.41  |

|          |          |          |          |          |          |          |          |          |          |          |          |          |          |          |          |
|----------|----------|----------|----------|----------|----------|----------|----------|----------|----------|----------|----------|----------|----------|----------|----------|
| 3245.315 | 12638.17 | 6765.556 | 3143.032 | 1416.772 | 3176.458 | 16188.73 | 19836.99 | 15225.28 | 29532.9  | 24146.34 | 22267.72 | 2947.551 | 5069.955 | 2265.185 | 4491.277 |
| 3921.765 | 1764.302 | 4318.443 | 2651.552 | 1937.629 | 6057.479 | 13289.17 | 10179.33 | 12368.02 | 13398.84 | 10499.89 | 18954.2  | 3332.613 | 6586.114 | 546.2358 | 3556.36  |
| 5525.268 | 15254.77 | 13351.82 | 5269.159 | 2357.767 | 3256.153 | 17376.26 | 15374.59 | 11899.14 | 21954.74 | 20445.08 | 20836.18 | 3142.422 | 6526.013 | 4556.119 | 5948.154 |
| 3997.308 | 11962.39 | 519.9855 | 5686.095 | 3463.458 | 2686.23  | 3904.708 | 5112.366 | 2260.743 | 10860.77 | 10107.71 | 810.8783 | 1935.76  | 4820.451 | 223.248  | 982.8658 |
| 4523.529 | 9374.244 | 8566.403 | 3859.734 | 5238.06  | 6499.641 | 12309.83 | 9927.706 | 13637.21 | 16267.88 | 13700.47 | 17788.11 | 3432.065 | 6979.801 | 1272.924 | 4337.215 |
| 5733.58  | 18825.22 | 4062.064 | 1421.874 | 1410.615 | 7659.168 | 23851.71 | 27643.94 | 24388.35 | 35954.71 | 28505.79 | 31317.79 | 2402.117 | 5874.431 | 1622.239 | 6981.337 |
| 1677.14  | 717.8305 | 4718.978 | 1014.551 | 587.3407 | 193.8172 | 3890.458 | 4275.644 | 3325.214 | 1515.746 | 1724.951 | 15938.45 | 2336.665 | 2859.929 | 67.9065  | 2330.245 |
| 4517.929 | 22150.52 | 6602.79  | 5576.049 | 3769.048 | 9611.492 | 17553.65 | 28789.38 | 20245.77 | 32997.36 | 32094.28 | 37151.51 | 2146.399 | 5786.666 | 1402.914 | 5111.48  |
| 3191.299 | 1996.218 | 2031.157 | 8393.265 | 1701.415 | 3671.901 | 8156.335 | 2440.29  | 7143.349 | 1341.132 | 4203.419 | 11769.72 | 3411.955 | 4924.372 | 1139.774 | 2654.673 |
| 3023.278 | 18867.72 | 717.5486 | 224.4785 | 207.4145 | 1694.864 | 12752.32 | 13678.24 | 14877.21 | 23327.31 | 18562.83 | 21088.74 | 526.5254 | 1196.438 | 1072.433 | 902.4423 |
| 5070.571 | 9618.853 | 7588.222 | 3217.818 | 4650.346 | 6568.083 | 11434.5  | 8788.383 | 12997    | 13957.97 | 13359.9  | 18130.68 | 3009.669 | 5986.246 | 1047.483 | 3341.912 |
| 8708.908 | 19966.12 | 12274.14 | 3987.44  | 3985.475 | 8908.347 | 24700.75 | 29986.28 | 25288.49 | 33645.54 | 32453.66 | 37593.62 | 4192.639 | 8530.514 | 2659.658 | 9069.322 |
| 7441.859 | 18659.8  | 6838.124 | 1748.547 | 1786.726 | 5881.976 | 19730.33 | 22399.5  | 20932.13 | 28646.57 | 27771.22 | 29875.44 | 2415.652 | 8744.124 | 1181.114 | 7240.293 |
| 2705.298 | 2806.586 | 8225.481 | 1272.872 | 849.2646 | 3567.963 | 9999.536 | 12414.86 | 12245.32 | 4297.092 | 6715.789 | 11969.14 | 4469.806 | 5237.502 | 276.3117 | 5139.404 |
| 1898.183 | 3952.531 | 7696.526 | 1756.851 | 4251.623 | 12303.21 | 30697.99 | 35648.16 | 38380.79 | 32434.99 | 19391.27 | 51123.16 | 3708.254 | 9703.664 | 274.0802 | 8839.453 |
| 1857.304 | 3558.252 | 6400.9   | 1761.008 | 3018.739 | 5951.414 | 13927.98 | 22094.57 | 15188.54 | 32284.94 | 18548.28 | 25531.08 | 3582.054 | 6938.422 | 311.3945 | 7229.31  |
| 3390.79  | 664.2986 | 3808.895 | 3036.855 | 20014.96 | 4571.551 | 8854.513 | 1201.957 | 11764.28 | 644.6495 | 3885.162 | 1443.529 | 1285.751 | 1001.419 | 431.8218 | 3277.471 |
| 2285.72  | 2445.38  | 4604.268 | 2734.672 | 2417.212 | 8392.596 | 10671.32 | 12232.2  | 9958.328 | 16028.57 | 8828.143 | 15902.82 | 3755.274 | 3480.805 | 639.063  | 4069.702 |
| 3468.853 | 2053.833 | 9878.912 | 943.3025 | 1391.113 | 12725.57 | 25465.01 | 22646.55 | 24093.54 | 23092.61 | 29415.69 | 29600.48 | 8771.818 | 10666.83 | 10885.84 | 7987.163 |
| 1275.775 | 540.9058 | 3758.972 | 771.2133 | 442.7612 | 146.1284 | 3031.621 | 3313.698 | 2589.604 | 1144.57  | 1305.116 | 13422.14 | 1823.681 | 2309.304 | 50.97414 | 1853.908 |
| 5627.765 | 19473.53 | 3637.831 | 4073.766 | 1189.102 | 5378.06  | 22840.84 | 31914.8  | 19579.54 | 45880.41 | 33050.01 | 26167.77 | 2720.205 | 6497.421 | 2241.523 | 4572.64  |
| 1682.719 | 9856.544 | 2364.873 | 404.4602 | 479.1097 | 4992.177 | 11940    | 16759.59 | 10400.45 | 9231.037 | 20694.5  | 18241.12 | 1560.422 | 2856.781 | 72.29172 | 3035.092 |
| 1659.992 | 7843.039 | 2387.609 | 404.4529 | 477.5642 | 4948.238 | 11318.31 | 15012.58 | 9901.494 | 7053.282 | 18464.81 | 17640.1  | 1565.516 | 2725.623 | 99.55717 | 3006.456 |
| 2145.779 | 947.0814 | 15102.11 | 1426.795 | 724.504  | 2506.144 | 1347.937 | 1790.826 | 2389.911 | 84.38815 | 6973.164 | 1185.756 | 0        | 0        | 202.675  | 1151.378 |
| 6874.273 | 15688.32 | 9263.698 | 4310.73  | 2676.077 | 8681.018 | 26060.55 | 31035.74 | 27442.69 | 35220.31 | 25240.41 | 29473.72 | 4635.294 | 9031.712 | 2792.506 | 6963.656 |
| 3918.505 | 9871.156 | 12892.03 | 3503.607 | 788.9407 | 3433.263 | 15946.56 | 23648    | 13988.62 | 35221.88 | 23997.21 | 18129.73 | 1674.437 | 4172.447 | 153.1488 | 2900.818 |
| 2953.507 | 13904.97 | 987.2453 | 391.5814 | 776.3043 | 133.9991 | 8484.718 | 8696.877 | 5639.347 | 12226.89 | 13251.6  | 9596.802 | 1240.436 | 755.9226 | 1646.27  | 1145.751 |
| 1612.841 | 2546.62  | 9013.274 | 2617.993 | 726.1721 | 624.1065 | 6916.325 | 5257.277 | 3421.536 | 3082.204 | 11691.73 | 8734.602 | 505.3772 | 1902.679 | 1249.842 | 892.987  |
| 3124.561 | 17194.64 | 4511.339 | 3377.207 | 1076.002 | 5285.822 | 25677.44 | 35312.03 | 26059.43 | 56710.44 | 25925.77 | 45719.55 | 2618.809 | 4202.491 | 258.8799 | 4923.011 |
| 1504.482 | 13339    | 669.0412 | 165.9401 | 74.53144 | 767.2142 | 5492.998 | 7419.8   | 4435.802 | 10254.09 | 11647.75 | 12019.21 | 210.8489 | 689.441  | 797.1022 | 480.853  |
| 2754.39  | 10965.92 | 7463.014 | 1023.341 | 1171.547 | 1728.708 | 3730.181 | 7029.732 | 1377.339 | 15092.23 | 9539.034 | 2393.315 | 2203.376 | 5513.768 | 3928.587 | 2304.189 |
| 2741.811 | 17834.55 | 876.3796 | 291.3234 | 273.2966 | 2094.861 | 13158.35 | 16444.3  | 14105.06 | 23656.11 | 19591.94 | 21503.02 | 751.3794 | 1595.999 | 1279.764 | 1284.44  |
| 5697.624 | 14949.17 | 6485.583 | 6912.165 | 1644.063 | 8830.931 | 17790.74 | 23874.55 | 16018.57 | 27420.08 | 33332.39 | 27981.96 | 2055.587 | 6299.83  | 3053.427 | 4821.499 |
| 3168.442 | 22922.01 | 3878.223 | 1319.151 | 1331.766 | 5873.194 | 21202.95 | 33080.04 | 20765.35 | 47179.08 | 35106.25 | 38056.29 | 2489.191 | 3676.381 | 1747.388 | 5025.369 |
| 1648.011 | 9684.569 | 2086.053 | 1049.004 | 604.522  | 3268.047 | 11071.77 | 15823.93 | 10826.93 | 25967.26 | 21531.38 | 17153.47 | 899.7081 | 2275.425 | 948.8822 | 1436.192 |



|          |          |          |          |          |          |          |          |          |          |          |          |          |          |          |          |
|----------|----------|----------|----------|----------|----------|----------|----------|----------|----------|----------|----------|----------|----------|----------|----------|
| 5691.912 | 14229.14 | 5592.839 | 6201.559 | 1635.164 | 6363.035 | 14828.22 | 19990.03 | 13983.84 | 25307.89 | 23910.84 | 23314.2  | 1991.885 | 4638.889 | 2323.213 | 3075.65  |
| 5249.413 | 14813.05 | 5879.746 | 6204.284 | 1449.379 | 8009.17  | 17204.91 | 23238.17 | 15347.57 | 27450.33 | 33673.24 | 27063.41 | 1825.865 | 5822.899 | 2745.358 | 4380.851 |
| 5249.413 | 14813.05 | 5879.746 | 6204.284 | 1449.379 | 8009.17  | 17204.91 | 23238.17 | 15347.57 | 27450.33 | 33673.24 | 27063.41 | 1825.865 | 5822.899 | 2745.358 | 4380.851 |
| 5249.413 | 14813.05 | 5879.746 | 6204.284 | 1449.379 | 8009.17  | 17204.91 | 23238.17 | 15347.57 | 27450.33 | 33673.24 | 27063.41 | 1825.865 | 5822.899 | 2745.358 | 4380.851 |
| 65.49387 | 169.9778 | 3421.07  | 5597.897 | 6697.488 | 2960.498 | 1238.209 | 826.2212 | 1277.036 | 1350.429 | 940.0947 | 3067.383 | 144.7557 | 130.5275 | 6.065764 | 303.5618 |
| 4260.452 | 26618.38 | 4789.765 | 284.3293 | 491.5777 | 530.8758 | 9996.037 | 24766.59 | 9722.221 | 58658.01 | 32992.65 | 17000.1  | 2328.592 | 2190.448 | 70.1805  | 2540.63  |
| 2627.146 | 14168.91 | 3295.836 | 1103.73  | 1111.932 | 4844.614 | 18655.86 | 21908.62 | 18773.76 | 14225.84 | 23872.72 | 25090.22 | 2107.655 | 3147.103 | 1405.569 | 4091.673 |
| 2448.368 | 3286.513 | 2599.042 | 1762.136 | 698.5681 | 2561.036 | 6403.156 | 4402.527 | 6038.39  | 5748.73  | 6997.892 | 13682.18 | 1719.71  | 3667.068 | 650.4665 | 2643.011 |
| 4174.534 | 14229.14 | 5319.743 | 1226.429 | 1138.849 | 6363.035 | 14828.22 | 19990.03 | 13983.84 | 25307.89 | 23910.84 | 23314.2  | 1730.384 | 4638.889 | 672.06   | 3163.528 |
| 5201.314 | 17847.46 | 12582.78 | 1679.888 | 1740.789 | 7414.736 | 21624.32 | 25506.07 | 22738.21 | 31402.71 | 22591.78 | 32516.23 | 2411.953 | 6434.616 | 428.5903 | 6768.611 |
| 144.3212 | 327.6819 | 236.4628 | 36.60707 | 269.0613 | 36.84246 | 1653.856 | 1139.902 | 1139.071 | 4104.797 | 1292.262 | 918.8499 | 800.3427 | 1016.551 | 108.2635 | 1002.704 |
| 1737.731 | 967.448  | 5329.055 | 846.1642 | 199.4715 | 43.52592 | 241.7548 | 909.9733 | 178.8192 | 90.98939 | 3552.307 | 168.8993 | 1892.124 | 1390.322 | 106.8148 | 3564.138 |
| 358.0637 | 383.5447 | 1600.755 | 773.2923 | 329.3537 | 112.4824 | 1539.679 | 305.7029 | 1698.023 | 1345.356 | 0        | 973.7476 | 589.2491 | 70.08555 | 373.6593 | 1404.862 |
| 4078.083 | 12411.18 | 4620.105 | 4987.553 | 1112.194 | 6571.492 | 14918.8  | 21423.88 | 13655.84 | 25404.83 | 28662.78 | 23344.3  | 1407.351 | 4606.149 | 2129.982 | 3603.573 |
| 8443.805 | 19422.76 | 6968.98  | 2009.981 | 2745.157 | 10322.42 | 21376.06 | 26422.01 | 19404.92 | 27641.39 | 30364.39 | 28206.37 | 4499.067 | 8743.722 | 1855.358 | 8169.64  |
| 2887.067 | 11920.46 | 10776.38 | 1518.363 | 4528.722 | 2459.58  | 15502.38 | 14371.22 | 14462.17 | 13329.39 | 19671.4  | 16465.85 | 3156.497 | 2988.399 | 4859.137 | 3089.801 |
| 3104.412 | 4358.619 | 8906.648 | 1359.243 | 1325.738 | 3488.801 | 15719.78 | 20613.42 | 16572.04 | 29439.67 | 17908.42 | 21747.6  | 1905.927 | 4812.359 | 127.0541 | 5756.365 |
| 4073.694 | 11675.43 | 3946.903 | 4437.244 | 1106.086 | 4586.073 | 11922.58 | 16981.99 | 11513.56 | 22764.41 | 19004.1  | 18667.33 | 1362.598 | 3307.395 | 1602.837 | 2202.17  |
| 4256.608 | 12799.55 | 5379.122 | 2341.507 | 1422.225 | 6128.51  | 20509.53 | 29209.81 | 21350.49 | 33014.91 | 21407    | 24776.77 | 2957.816 | 5835.236 | 1735.693 | 4543.148 |
| 760.3199 | 832.7186 | 448.876  | 8116.89  | 1412.386 | 7643.673 | 4282.226 | 655.8803 | 2564.336 | 226.0812 | 1457.376 | 2880.754 | 0        | 0        | 0        | 726.1978 |
| 0        | 0        | 0        | 504.9868 | 330.0624 | 75.42501 | 1658.127 | 0        | 278.5816 | 482.0985 | 2533.707 | 256.7995 | 0        | 80.13986 | 0        | 1111.455 |
| 6974.862 | 22050.95 | 5182.342 | 1637.335 | 2216.2   | 8576.329 | 26831.58 | 30512.97 | 26212.31 | 37252.94 | 33931.64 | 33544.54 | 3873.844 | 9226.691 | 1501.059 | 6921.944 |
| 1869.147 | 8788.543 | 1740.865 | 1022.239 | 604.0818 | 2402.163 | 9616.13  | 14387.17 | 9995.113 | 22159.89 | 14622.47 | 14951.32 | 717.1547 | 1894.645 | 637.3019 | 1242.62  |
| 96.09089 | 630.9123 | 2262.091 | 339.9148 | 1016.787 | 4228.14  | 15297.44 | 17765.81 | 17250.63 | 19459.96 | 10942.01 | 23521.31 | 1738.988 | 3607.733 | 162.3382 | 3312.566 |
| 3369.006 | 21174    | 8761.166 | 1098.67  | 1027.567 | 4372.254 | 17349.08 | 23527.76 | 18239.14 | 37624.08 | 19219.69 | 27929.84 | 1617.198 | 4552.223 | 101.739  | 4876.547 |
| 3730.477 | 17756.45 | 7577.75  | 1419.357 | 1072.213 | 5246.975 | 18019.82 | 22989.34 | 19040.32 | 30702.29 | 19609.62 | 28312.66 | 2162.406 | 4831.855 | 469.8395 | 4530.263 |
| 1521.668 | 3151.604 | 3040.45  | 205.027  | 271.148  | 49.50703 | 4430.928 | 11183.44 | 869.2396 | 23877.46 | 13621.89 | 1427.141 | 485.2155 | 1014.287 | 247.1186 | 1623.145 |
| 714.6057 | 302.0399 | 405.3545 | 5165.644 | 4899.35  | 7730.772 | 1964.578 | 158.2511 | 1347.166 | 192.3999 | 3738.05  | 2359.617 | 450.8793 | 716.2108 | 506.2803 | 684.8642 |
| 2039.293 | 17909.99 | 2119.856 | 750.4676 | 539.3763 | 3440.927 | 15755.86 | 24789.14 | 15920.37 | 39678.42 | 23803.76 | 29920.89 | 1294.994 | 2490.839 | 241.9369 | 2852.571 |
| 1931.001 | 8838.079 | 2969.384 | 674.1703 | 701.1705 | 3269.262 | 10985.38 | 14599.89 | 13127.76 | 22408.91 | 16328.75 | 19328.76 | 1053.787 | 2480.132 | 375.7099 | 1938.434 |
| 753.9051 | 2457.292 | 1148.377 | 184.9261 | 143.7276 | 238.4314 | 1396.802 | 4833.446 | 242.0506 | 11002.82 | 5913.792 | 74.39123 | 1091.754 | 3871.81  | 844.8345 | 1254.931 |
| 966.378  | 1350.538 | 1047.322 | 176.9372 | 330.3345 | 155.8767 | 3584.037 | 920.6937 | 1197.942 | 4369.408 | 3069.893 | 345.0585 | 271.8816 | 2578.903 | 21.20426 | 1068.798 |
| 960.8162 | 1289.396 | 1063.128 | 176.4526 | 335.2725 | 156.6783 | 3778.174 | 926.9517 | 1218.568 | 4403.149 | 3085.655 | 345.944  | 271.8703 | 2700.136 | 21.02945 | 1083.924 |
| 5321.707 | 18375.73 | 10168.29 | 526.7243 | 683.5059 | 3969.468 | 21208.21 | 25169.96 | 24501.97 | 37928.07 | 22081.12 | 28943.37 | 1927.259 | 6585.935 | 265.1202 | 3872.981 |
| 2777.916 | 2563.292 | 3372.222 | 953.1556 | 3979.737 | 1059.105 | 5381.405 | 839.9063 | 1467.687 | 934.7683 | 6208.426 | 1089.222 | 2678.156 | 3701.078 | 767.8929 | 1723.539 |

|          |          |          |          |          |          |          |          |          |          |          |          |          |          |          |          |
|----------|----------|----------|----------|----------|----------|----------|----------|----------|----------|----------|----------|----------|----------|----------|----------|
| 1884.972 | 123.995  | 3928.947 | 334.1522 | 900.3876 | 6140.15  | 19203.94 | 25285.35 | 21258.02 | 25814.48 | 21634.98 | 30498.51 | 1997.887 | 4221.54  | 904.2512 | 4463.885 |
| 122.9609 | 0        | 36.15978 | 386.8118 | 150.671  | 45.64554 | 1623.13  | 39.56143 | 301.0109 | 180.9109 | 8971.538 | 2090.378 | 0        | 44.49084 | 1266.347 | 954.5151 |
| 1731.363 | 12997.29 | 1078.114 | 301.5958 | 274.6128 | 1918.662 | 9337.486 | 16141.92 | 10815.97 | 32505.06 | 18114.03 | 19559.26 | 815.2723 | 3215.161 | 133.1949 | 1792.85  |
| 3502.956 | 16061.91 | 3032.433 | 753.6028 | 912.0714 | 3896.878 | 16292.09 | 21042.36 | 18653.25 | 29629.93 | 23272.27 | 25744.89 | 1439.454 | 2946.112 | 103.2616 | 4005.148 |
| 894.8189 | 2157.524 | 2853.988 | 425.226  | 458.2163 | 2421.717 | 9232.37  | 13473.28 | 9912.06  | 20628.67 | 11786.9  | 15308.86 | 1340.765 | 3415.977 | 295.2254 | 2058.216 |
| 3350.575 | 16198.31 | 2877.146 | 714.5882 | 864.5401 | 3814.032 | 15858.85 | 20800.68 | 18112.3  | 33135.82 | 22635.63 | 25369.24 | 1378.558 | 2818.611 | 97.66915 | 3840.533 |
| 3918.505 | 9871.156 | 2217.558 | 1353.757 | 710.0247 | 3433.263 | 15946.56 | 23648    | 13988.62 | 36333.86 | 23997.21 | 18129.73 | 1674.437 | 4172.447 | 120.8516 | 2900.818 |
| 4174.534 | 14229.14 | 1389.338 | 1226.429 | 1138.849 | 6363.035 | 14828.22 | 19990.03 | 13983.84 | 25307.89 | 23910.84 | 23314.2  | 1094.193 | 4638.889 | 92.867   | 3075.65  |
| 4174.534 | 14229.14 | 1389.338 | 1226.429 | 1138.849 | 6363.035 | 14828.22 | 19990.03 | 13983.84 | 25307.89 | 23910.84 | 23314.2  | 1094.193 | 4638.889 | 92.867   | 3075.65  |
| 70.45574 | 0        | 132.4634 | 570.8969 | 0        | 0        | 6756.351 | 3348.837 | 8966.89  | 1017.712 | 58.99266 | 487.0567 | 793.4323 | 320.1231 | 1884.234 | 2177.033 |
| 1969.499 | 11996.01 | 3762.952 | 2585.68  | 3263.633 | 5227.763 | 19727.24 | 30574.86 | 21452.19 | 37701.73 | 19120.67 | 34308.5  | 1215.647 | 4342.89  | 283.0038 | 3615.588 |
| 1969.499 | 11996.01 | 3762.952 | 2585.68  | 3263.633 | 5227.763 | 19727.24 | 30574.86 | 21452.19 | 37701.73 | 19120.67 | 34308.5  | 1215.647 | 4342.89  | 283.0038 | 3615.588 |
| 541.7569 | 257.4564 | 2708.023 | 348.7754 | 148.7219 | 476.0619 | 2244.236 | 1554.306 | 1033.26  | 4661.596 | 5053.763 | 1311.127 | 2420.292 | 1837.516 | 2634.9   | 1443.387 |
| 970.4575 | 8914.239 | 0        | 2309.443 | 6762.368 | 1143.326 | 6875.366 | 13204.22 | 7138.683 | 23201.98 | 11087.77 | 12078.54 | 362.5749 | 0        | 80.51057 | 831.5473 |
| 21588.4  | 25110.66 | 2652.382 | 118.8733 | 205.1906 | 1060.405 | 6721.024 | 13194.6  | 7386.922 | 21308.32 | 17802.56 | 13890.13 | 680.9059 | 2858.341 | 165.214  | 606.288  |
| 2036.818 | 8809.795 | 2303.822 | 2349.422 | 495.8624 | 3221.855 | 9462.063 | 15458.14 | 8652.431 | 21630.34 | 23519.44 | 16086.33 | 643.8994 | 2432.282 | 998.4913 | 1786.484 |
| 1556.795 | 11064    | 290.05   | 196.3274 | 318.964  | 1152.403 | 5181.358 | 8459.024 | 4170.366 | 22668.04 | 14609.91 | 20892.58 | 398.2017 | 443.0013 | 653.0203 | 828.5936 |
| 4037.414 | 15889.11 | 2118.308 | 713.2358 | 876.3878 | 5346.701 | 15604.27 | 19255.55 | 16729.21 | 22955.03 | 19710.66 | 23211.66 | 1623.402 | 4082.548 | 1043.257 | 3066.784 |
| 2858.678 | 2603.383 | 556.0031 | 2768.337 | 5003.892 | 1833.742 | 644.523  | 0        | 96.83777 | 353.5308 | 4614.29  | 1120.104 | 0        | 573.7253 | 0        | 610.5584 |
| 964.1733 | 88.24757 | 2007.96  | 130.4657 | 598.6736 | 1440.656 | 11175.72 | 13948.65 | 13048.49 | 8034.602 | 24300.68 | 14311.76 | 726.8183 | 1550.958 | 2768.374 | 2154.511 |
| 994.8044 | 62.14083 | 2160.415 | 168.1287 | 467.4677 | 3615.454 | 13851.73 | 18874.14 | 16391.82 | 19510.95 | 14119.64 | 24078.98 | 1197.993 | 2407.009 | 548.9698 | 2542.85  |
| 2595.563 | 16465.63 | 1931.913 | 898.5625 | 485.5831 | 2841.722 | 16827.01 | 25886.54 | 18790.64 | 42244.64 | 18271.68 | 32876.59 | 1171.144 | 2850.292 | 74.83166 | 2718.944 |
| 3738.68  | 14546.97 | 2573.11  | 734.7401 | 746.8815 | 3638.027 | 13906.26 | 12351    | 13970.64 | 17328.8  | 22006.8  | 10576.02 | 1743.969 | 4944.88  | 105.7503 | 3628.667 |
| 3871.532 | 21198.45 | 3077.788 | 762.2756 | 1049.086 | 6439.047 | 24268.51 | 35224.58 | 25262.59 | 40431.65 | 37801.7  | 35197.88 | 2021.565 | 6010.495 | 741.9027 | 4391.58  |
| 2114.49  | 10295.18 | 2186.324 | 536.4074 | 545.4354 | 3350.196 | 16036.18 | 24835.81 | 14713.54 | 38601.94 | 21465.57 | 21115.85 | 1427.14  | 2931.225 | 53.83411 | 2724.015 |
| 2930.255 | 11675.43 | 939.1308 | 828.807  | 766.9482 | 4586.073 | 11922.58 | 16981.99 | 11513.56 | 22764.41 | 19004.1  | 18667.33 | 739.8039 | 3307.395 | 61.99486 | 2202.17  |
| 1594.457 | 10608.27 | 2454.517 | 766.1298 | 849.2854 | 3364.675 | 9598.862 | 16394.77 | 11884.41 | 28535.4  | 13200    | 18589.38 | 953.5382 | 2428.633 | 271.9487 | 1964.219 |
| 2435.41  | 16734.7  | 2712.356 | 719.8827 | 635.6815 | 4368.944 | 20027.71 | 29827.43 | 23421.63 | 45698.59 | 23969.61 | 34978.58 | 1603.537 | 6369.328 | 40.16842 | 2784.271 |
| 1361.019 | 9409.621 | 1374.181 | 492.6686 | 471.5269 | 2306.9   | 12297.64 | 12458.03 | 12867.07 | 14068.89 | 12476.34 | 16295.16 | 1301.796 | 2606.83  | 423.7491 | 2506.012 |
| 2044.119 | 9723.703 | 2013.943 | 453.3638 | 497.4011 | 3121.013 | 14691.2  | 22687.79 | 13555.09 | 35354.46 | 20918.02 | 18647.79 | 1321.459 | 2770.428 | 46.08358 | 2539.318 |
| 2607.173 | 17371.73 | 3748.828 | 471.6922 | 707.5993 | 4860.315 | 22522.93 | 31563.57 | 23491.63 | 44400.3  | 29924.35 | 34215.64 | 1750.381 | 2761.644 | 450.5459 | 3960.289 |
| 2588.582 | 16395.34 | 3744.114 | 469.7731 | 704.8581 | 4485.941 | 22139.21 | 29011.36 | 23597.47 | 42075.35 | 29100.1  | 33108.53 | 1700.563 | 2742.446 | 445.3351 | 3906.005 |
| 1257.296 | 9181.414 | 1563.815 | 298.5432 | 336.0096 | 2402.163 | 9616.13  | 14387.17 | 9995.113 | 22159.89 | 15377.52 | 14951.32 | 631.6401 | 1894.645 | 644.2243 | 1232.799 |
| 997.3762 | 2071.986 | 402.0298 | 832.231  | 107.6324 | 505.1782 | 1227.015 | 1614.397 | 624.2333 | 390.7564 | 102.78   | 343.7144 | 94.95234 | 137.5641 | 5.038108 | 34.31174 |
| 27.71047 | 184.8851 | 750.749  | 109.1862 | 392.3788 | 1699.318 | 7640.217 | 8775.038 | 9210.108 | 9269.476 | 4192.574 | 12756.54 | 697.7315 | 1505.102 | 51.81967 | 1376.782 |

|          |          |          |          |          |          |          |          |          |          |          |          |          |          |          |          |
|----------|----------|----------|----------|----------|----------|----------|----------|----------|----------|----------|----------|----------|----------|----------|----------|
| 1950.647 | 15954.77 | 1423.128 | 480.8631 | 185.2579 | 1273.373 | 7519.288 | 13357.4  | 9291.414 | 20703.21 | 8661.367 | 15992.11 | 896.063  | 1242.306 | 47.26727 | 2097.197 |
| 1131.478 | 981.6391 | 2093.257 | 679.8026 | 371.2777 | 0        | 5362.472 | 1401.092 | 2008.025 | 115.4394 | 686.8468 | 418.6409 | 291.3339 | 1283.354 | 69.04237 | 12.13617 |
| 1364.668 | 10862.4  | 1750.617 | 433.5995 | 305.0625 | 2755.363 | 12495.6  | 20305.93 | 12203.55 | 31181.94 | 16444.49 | 20609.3  | 892.5788 | 2470.136 | 28.81851 | 1925.431 |
| 2313.489 | 16148.47 | 3323.097 | 413.3656 | 620.6698 | 4317.011 | 21310.51 | 29459.07 | 22390.75 | 42112.58 | 27723.99 | 32931.15 | 1544.807 | 2465.92  | 395.3675 | 3534.673 |
| 648.8168 | 58.90384 | 1357.128 | 87.04432 | 400.675  | 971.0339 | 8155.575 | 10572.24 | 9632.73  | 5816.645 | 19255.85 | 10631.23 | 488.9405 | 1054.956 | 1930.168 | 1473.828 |
| 551.7531 | 4822.132 | 1515.788 | 258.0372 | 301.1433 | 2168.22  | 4068.776 | 6303.634 | 1763.333 | 15332.31 | 12028.27 | 10081.37 | 690.1391 | 1775.865 | 18.19429 | 1362.672 |
| 1167.865 | 8920.311 | 1037.316 | 397.9524 | 349.9096 | 2492.82  | 12109.97 | 12562.17 | 13249.34 | 12357.22 | 11087.39 | 17379.68 | 1104.272 | 2741.76  | 314.2493 | 2576.279 |
| 1360.28  | 11661.93 | 1496.923 | 231.9316 | 513.3007 | 3754.489 | 15931.44 | 19860.29 | 18576.91 | 24977.58 | 18191.66 | 29722.17 | 1122.061 | 2600.26  | 64.47532 | 2643.686 |
| 1477.202 | 4620.406 | 546.0339 | 660.8028 | 132.2261 | 303.1229 | 1211.019 | 1997.955 | 842.6304 | 6190.957 | 6385.487 | 6023.012 | 346.3711 | 516.6711 | 0        | 475.5386 |
| 113.9411 | 497.7673 | 847.8416 | 208.2485 | 96.13082 | 25.96735 | 71.91242 | 146.7993 | 17.64561 | 110.8233 | 827.2628 | 24.86826 | 506.5146 | 1184.399 | 69.14999 | 972.3873 |
| 3142.318 | 15634.23 | 1368.116 | 364.6915 | 154.2145 | 838.6756 | 3248.976 | 2803.52  | 3256.235 | 3598.569 | 7945.125 | 2532.679 | 353.4424 | 1799.759 | 392.8534 | 1198.004 |
| 223.8777 | 179.4513 | 190.4067 | 36.57476 | 24.17249 | 91.77743 | 678.7499 | 52.28441 | 43.67706 | 218.9886 | 163.4405 | 27.15136 | 233.6971 | 1481.123 | 0        | 217.8925 |
| 1148.697 | 8606.517 | 1956.137 | 288.9151 | 781.1285 | 2601.691 | 13461.09 | 20717.57 | 14133.08 | 29641.79 | 16319.85 | 24168.57 | 948.2012 | 2100.362 | 645.5535 | 2428.492 |
| 0        | 0        | 0        | 159.9101 | 509.4856 | 0        | 0        | 0        | 0        | 0        | 0        | 0        | 91.98354 | 103.2728 | 0        | 0        |
| 1029.461 | 9429.899 | 1049.222 | 234.3107 | 272.2001 | 2013.428 | 11940.27 | 18560.82 | 12540.09 | 29956.74 | 16651.88 | 24438.03 | 1132.009 | 2933.762 | 26.67104 | 2291.772 |
| 63.19185 | 13.14516 | 2272.843 | 239.3611 | 547.871  | 3251.224 | 9215.281 | 15115.85 | 10429.26 | 6436.678 | 8317.402 | 14313.92 | 1285.492 | 3375.913 | 28.25969 | 1933.201 |
| 1079.519 | 9889.884 | 1682.512 | 237.7731 | 258.4998 | 1695.975 | 13132.89 | 19869.68 | 13568.81 | 33002.37 | 13473.87 | 26696.19 | 632.565  | 1605.217 | 16.27282 | 1365.334 |
| 335.6291 | 3396.796 | 1367.187 | 174.0213 | 377.5677 | 2006.624 | 8508.348 | 11194.1  | 11649.31 | 18463.39 | 10673.65 | 16933.69 | 709.6341 | 1760.262 | 189.4031 | 1515.729 |
| 366.9852 | 95.51421 | 323.1084 | 59.45735 | 32.11655 | 0        | 420.0144 | 127.7064 | 140.3321 | 19.21975 | 54.07501 | 62.93319 | 126.3761 | 0        | 38.39841 | 103.3209 |
| 366.9852 | 95.51421 | 323.1084 | 59.45735 | 32.11655 | 0        | 420.0144 | 127.7064 | 140.3321 | 19.21975 | 54.07501 | 62.93319 | 126.3761 | 0        | 38.39841 | 103.3209 |
| 366.9852 | 95.51421 | 323.1084 | 59.45735 | 32.11655 | 0        | 420.0144 | 127.7064 | 140.3321 | 19.21975 | 54.07501 | 62.93319 | 126.3761 | 0        | 38.39841 | 103.3209 |
| 25.34998 | 0        | 110.916  | 234.2749 | 85.60323 | 153.6705 | 1581.792 | 1329.209 | 1388.737 | 2173.219 | 1172.363 | 1614.61  | 213.8144 | 161.8141 | 0        | 684.6329 |
| 1880.602 | 12571.5  | 1314.439 | 328.7143 | 555.0368 | 2225.37  | 11632.3  | 20197.9  | 11318.68 | 27689.89 | 18021.54 | 18930.5  | 713.088  | 1897.976 | 53.07344 | 1617.626 |
| 1252.446 | 8082.657 | 378.4775 | 309.6326 | 573.3184 | 600.2576 | 2403.142 | 4045.373 | 3443.86  | 7611.596 | 4072.027 | 6620.908 | 172.7453 | 598.6362 | 237.5186 | 515.2248 |
| 13.35035 | 0        | 919.8032 | 63.99972 | 325.1016 | 1700.737 | 6832.484 | 9090.216 | 8375.134 | 6713.838 | 4032.015 | 12965.13 | 668.7316 | 1767.3   | 7.891193 | 1564.439 |
| 46.80458 | 0        | 1167.459 | 248.186  | 333.0756 | 172.4743 | 8632.356 | 12977.32 | 1600.624 | 15728.74 | 8006.234 | 4054.961 | 612.2618 | 1304.926 | 43.25947 | 2461.502 |
| 39.9905  | 15.34837 | 2713.558 | 190.8696 | 170.1542 | 4144.687 | 5368.763 | 5829.869 | 5490.5   | 14051.74 | 3389.638 | 14179.45 | 420.9002 | 2215.188 | 29.60473 | 2241.688 |
| 1362.722 | 11432.28 | 1954.222 | 237.2408 | 357.1859 | 2629.22  | 14998.22 | 22522.42 | 15894.17 | 34279.42 | 20069.28 | 24616.81 | 906.995  | 1469.77  | 228.3185 | 2135.113 |
| 0        | 0        | 70.12967 | 10.32061 | 0        | 0        | 585.0101 | 180.807  | 443.214  | 52.67616 | 513.7466 | 14.92418 | 746.4531 | 99.72852 | 363.2929 | 9.508848 |
| 524.4925 | 247.5072 | 2432.718 | 0        | 207.0658 | 0        | 0        | 0        | 12.82861 | 11.28028 | 1063.917 | 0        | 74.79776 | 13.85625 | 0        | 1273.429 |
| 1380.628 | 1642.74  | 982.1825 | 216.5801 | 85.78479 | 0        | 3152.147 | 2040.547 | 2436.698 | 200.451  | 1163.605 | 713.2737 | 201.4171 | 977.8514 | 146.1451 | 21.00935 |
| 0        | 0        | 0        | 21.74958 | 16.01441 | 0        | 17.58658 | 0        | 0        | 41.56046 | 32.60977 | 58.17912 | 0        | 0        | 0        | 27.15588 |
| 1416.262 | 9926.596 | 977.2941 | 180.8373 | 368.4061 | 2132.698 | 8527.836 | 13741.49 | 8777.8   | 22625.44 | 15912.83 | 14288.8  | 588.2908 | 1764.157 | 668.2413 | 1260.774 |
| 2046.569 | 7888.22  | 1144.401 | 354.7518 | 522.8764 | 2675.646 | 13754.09 | 21394.19 | 11870.09 | 32202.52 | 20334.77 | 15939.56 | 930.9584 | 2100.184 | 29.80596 | 1593.326 |
| 486.0282 | 37.59597 | 947.7397 | 135.2231 | 118.2129 | 53.9628  | 255.5956 | 1225.649 | 163.4249 | 1247.973 | 4540.316 | 4851.688 | 526.6729 | 1812.632 | 852.0371 | 593.2894 |

|          |          |          |          |          |          |          |          |          |          |          |          |          |          |          |          |
|----------|----------|----------|----------|----------|----------|----------|----------|----------|----------|----------|----------|----------|----------|----------|----------|
| 2403.675 | 1923.708 | 10493.98 | 0        | 0        | 0        | 2570.797 | 48.10301 | 332.7084 | 0        | 135.1651 | 0        | 685.8567 | 0        | 0        | 247.2932 |
| 514.2429 | 1452.992 | 828.9716 | 118.9328 | 256.7694 | 1694.18  | 8397.309 | 8247.845 | 9557.625 | 11291.11 | 6347.17  | 14699.34 | 715.3603 | 3180.926 | 11.60916 | 1321.35  |
| 973.0051 | 3847.059 | 1923.178 | 252.9639 | 284.0246 | 1791.213 | 9613.423 | 13026.9  | 12083.95 | 17807.34 | 7631.529 | 20169.5  | 634.2504 | 1808.171 | 19.89077 | 1443.3   |
| 1321.145 | 8267.15  | 763.0593 | 359.1205 | 142.0012 | 472.5975 | 5698.503 | 5001.897 | 2301.005 | 11238.01 | 11100.56 | 8760.705 | 185.2975 | 878.4979 | 68.51938 | 74.99737 |
| 918.6634 | 411.189  | 604.0717 | 0        | 512.796  | 132.46   | 362.0349 | 0        | 0        | 569.4497 | 4666.727 | 213.5151 | 428.151  | 2049.259 | 101.4345 | 693.0625 |
| 220.7677 | 12.45633 | 684.8498 | 37.5847  | 134.9988 | 1042.489 | 5316.857 | 7125.681 | 7525.068 | 6902.776 | 3954.888 | 10426.69 | 384.5797 | 663.1113 | 145.6579 | 711.8595 |
| 242.625  | 953.2138 | 110.7542 | 108.5548 | 69.66321 | 0        | 2147.416 | 755.4792 | 1597.875 | 193.9659 | 1042.359 | 659.9149 | 144.9159 | 654.8427 | 0        | 20.67986 |
| 517.3104 | 3066.531 | 385.7941 | 130.3961 | 311.1604 | 65.80753 | 4818.099 | 13898.86 | 470.2094 | 26762.69 | 16971.13 | 1151.834 | 149.9338 | 641.9958 | 50.79491 | 490.4138 |
| 1022.845 | 7563.359 | 1535.655 | 132.9001 | 228.9845 | 1780.439 | 9046.418 | 12798.69 | 10260.1  | 19961.35 | 9881.769 | 13729.16 | 700.6545 | 1379.715 | 10.64385 | 1415.088 |
| 0        | 0        | 0        | 0        | 5.196305 | 20.64852 | 20.58627 | 0        | 0        | 103.5031 | 306.4504 | 287.5304 | 0        | 0        | 0        | 70.92184 |
| 2396.413 | 12566.81 | 1087.451 | 256.8083 | 254.8913 | 2719.879 | 11230.15 | 17544.66 | 12205.32 | 28193.32 | 22957.59 | 21496.39 | 748.5728 | 2024.153 | 797.8099 | 2002.643 |
| 971.3116 | 750.2498 | 916.0857 | 183.0719 | 79.40383 | 33.36135 | 185.8486 | 695.0871 | 138.3331 | 70.66224 | 2388.433 | 130.8848 | 399.1757 | 789.9145 | 18.88249 | 827.6375 |
| 1255.255 | 10196.73 | 724.6058 | 255.472  | 143.4369 | 1379.524 | 5467.208 | 8148.823 | 6319.737 | 13102.11 | 7039.668 | 12032.33 | 397.9863 | 1168.193 | 0        | 1057.524 |
| 1570.86  | 13151.76 | 415.9162 | 2097.32  | 16744.34 | 4470.213 | 6352.717 | 7200.14  | 5858.931 | 14817.16 | 10485.22 | 10024.01 | 309.6776 | 799.95   | 469.8412 | 710.9852 |
| 0        | 0        | 0        | 0        | 0        | 0        | 162.302  | 0        | 9.253331 | 0        | 1927.835 | 48.20044 | 0        | 0        | 0        | 0        |
| 2335.752 | 12281.36 | 321.5735 | 308.0667 | 10.87215 | 1548.124 | 7890.101 | 11015.36 | 8896.048 | 15397.15 | 5827.359 | 14175.62 | 267.6606 | 488.7127 | 0        | 451.2112 |
| 1473.135 | 7039.45  | 921.5583 | 211.4546 | 324.2903 | 1416.415 | 7176.067 | 9448.952 | 4837.255 | 14657.19 | 11164.96 | 11123.75 | 761.8591 | 1561.299 | 15.44733 | 1077.835 |
| 1174.946 | 9801.433 | 983.6482 | 217.3345 | 234.95   | 1976.985 | 7468.745 | 11134.65 | 8880.495 | 13703.49 | 12527.66 | 15994.51 | 266.6158 | 715.0878 | 325.0373 | 999.2955 |
| 175.5926 | 42.96718 | 170.2263 | 28.81229 | 15.00203 | 0        | 190.4279 | 57.03609 | 62.75451 | 8.546029 | 24.07702 | 28.02759 | 60.87042 | 0        | 17.27625 | 47.81877 |
| 0        | 0        | 88.27828 | 2112.528 | 189.9139 | 1753.497 | 471.8232 | 0        | 72.2947  | 0        | 0        | 0        | 14.65265 | 10.32112 | 0        | 1151.144 |
| 0        | 0        | 0        | 0        | 0        | 0        | 489.5094 | 46.29201 | 243.3474 | 29.15797 | 0        | 59.41711 | 33.201   | 0        | 51.28779 | 284.9586 |
| 1505.365 | 1496.886 | 668.2741 | 96.89328 | 201.5706 | 1668.263 | 5330.677 | 5741.731 | 4163.219 | 8028.078 | 7339.687 | 1679.057 | 582.4892 | 1262.276 | 19.0812  | 1028.899 |
| 981.2987 | 8277.934 | 657.781  | 185.819  | 91.32811 | 422.5472 | 5600.159 | 10072.41 | 6329.319 | 17179.31 | 14096.96 | 13595.87 | 281.0388 | 564.8041 | 1243.085 | 868.3314 |
| 47.14028 | 7.915472 | 711.0468 | 53.23056 | 124.6258 | 1182.254 | 5915.485 | 8514.174 | 6643.936 | 9100.192 | 3968.476 | 9113.131 | 525.1505 | 910.6784 | 9.416329 | 601.2456 |
| 0        | 0        | 0        | 51.77892 | 149.0668 | 143.7804 | 3575.985 | 8187.083 | 7585.068 | 0        | 1132.396 | 791.811  | 455.5321 | 571.1566 | 0        | 0        |
| 803.863  | 6575.69  | 789.2245 | 67.72631 | 145.2522 | 1214.741 | 6952.283 | 10424.78 | 7694.809 | 14733.92 | 7196.069 | 10200.27 | 495.8051 | 1005.859 | 7.853525 | 887.9908 |
| 803.863  | 6575.69  | 789.2245 | 67.72631 | 145.2522 | 1214.741 | 6952.283 | 10424.78 | 7694.809 | 14733.92 | 7196.069 | 10200.27 | 495.8051 | 1005.859 | 7.853525 | 887.9908 |
| 0        | 0        | 0        | 12.17846 | 127.1207 | 561.6399 | 386.0284 | 112.9926 | 4585.168 | 2956.801 | 0        | 356.2289 | 0        | 0        | 0        | 0        |
| 9098.142 | 7331.841 | 1116.034 | 1150.929 | 80.71488 | 1203.442 | 602.2032 | 0        | 83.41497 | 1383.873 | 5022.414 | 532.9295 | 86.43672 | 144.5439 | 0        | 627.1408 |
| 12.04467 | 0        | 193.2101 | 13.88752 | 11.01541 | 492.4636 | 3249.737 | 1085.466 | 2653.303 | 687.8439 | 2257.787 | 1361.219 | 160.0768 | 284.7348 | 0        | 255.403  |
| 1318.342 | 12007.03 | 240.5924 | 129.782  | 59.09592 | 1002.691 | 2186.916 | 2901.354 | 2555.812 | 8194.028 | 1431.894 | 8010.761 | 224.3741 | 712.3547 | 17.98514 | 227.27   |
| 1348.953 | 12035.16 | 571.2544 | 116.3326 | 136.5543 | 862.3678 | 6224.957 | 11390.5  | 5117.998 | 21372.04 | 10658.97 | 8058.869 | 306.7372 | 1061.194 | 0        | 864.6451 |
| 1375.825 | 12210.07 | 208.9547 | 121.7446 | 54.35306 | 1006.48  | 1917.554 | 2489.624 | 2220.91  | 7365.18  | 1221.598 | 7401.707 | 206.5268 | 667.2825 | 18.00078 | 196.7386 |
| 40.64117 | 393.5973 | 66.47864 | 0        | 34.25372 | 0        | 198.5494 | 28.8899  | 33.84757 | 21.97202 | 1473.429 | 28.37378 | 58.71248 | 35.30814 | 0        | 161.239  |
| 16.48549 | 12.3413  | 615.2848 | 36.57479 | 70.03479 | 28.7739  | 159.6688 | 590.5522 | 118.7651 | 60.43953 | 1818.719 | 112.2441 | 357.1686 | 510.9983 | 0        | 578.5647 |

|          |          |          |          |          |          |          |          |          |          |          |          |          |          |          |          |
|----------|----------|----------|----------|----------|----------|----------|----------|----------|----------|----------|----------|----------|----------|----------|----------|
| 858.5797 | 1019.976 | 1820.914 | 5792.067 | 886.8175 | 3941.018 | 2347.94  | 2414.633 | 2057.392 | 64.84407 | 4265.54  | 1867.581 | 398.2611 | 2697.856 | 449.711  | 982.8184 |
| 982.8018 | 768.8883 | 5077.183 | 0        | 0        | 0        | 1029.565 | 18.05669 | 125.8827 | 0        | 50.79911 | 0        | 262.5395 | 0        | 0        | 93.68456 |
| 5.57852  | 0        | 126.2127 | 6.662842 | 68.87651 | 324.4625 | 2580.642 | 1083.488 | 1774.672 | 1197.404 | 1498.727 | 1428.403 | 157.1516 | 197.5241 | 0        | 162.2667 |
| 934.0708 | 949.2972 | 410.1914 | 58.24922 | 121.2751 | 1101.516 | 3864.439 | 5800.304 | 2982.654 | 9820.286 | 5457.477 | 1188.444 | 360.9139 | 829.0727 | 11.46003 | 651.3298 |
| 1243.539 | 9592.682 | 370.5018 | 77.5263  | 218.4082 | 564.1328 | 10026.18 | 17355.54 | 12869.75 | 23837.01 | 16280.22 | 9029.201 | 218.4128 | 1834.203 | 46.53412 | 1102.912 |
| 9.046588 | 0        | 185.5221 | 10.79002 | 69.30476 | 318.5313 | 0        | 16.64319 | 82.36293 | 27.09814 | 345.6246 | 26.57255 | 196.2771 | 285.9504 | 0        | 236.1505 |
| 129.1072 | 0        | 285.549  | 16.38302 | 93.35906 | 395.3871 | 2372.234 | 2615.659 | 2669.025 | 3560.5   | 1856.869 | 5282.142 | 100.2959 | 401.8307 | 5.159981 | 422.1234 |
| 1305.017 | 1111.128 | 276.0938 | 138.3715 | 149.7638 | 707.7621 | 4918.46  | 8176.328 | 5604.489 | 6248.353 | 8036.631 | 8967.243 | 216.2686 | 533.2985 | 0        | 532.4815 |
| 0        | 0        | 0        | 17.06231 | 96.03661 | 35.42085 | 1154.575 | 3716.332 | 4827.176 | 0        | 277.5443 | 183.1605 | 346.457  | 257.6929 | 0        | 0        |
| 382.3731 | 0        | 369.9782 | 16.96566 | 54.44052 | 422.6748 | 1323.556 | 2798.465 | 2230.52  | 1283.022 | 579.3743 | 1735.623 | 53.12998 | 1578.344 | 0        | 464.5069 |
| 7.423142 | 0        | 127.7668 | 8.663664 | 6.854082 | 329.2985 | 2328.533 | 1300.409 | 1787.894 | 1457.753 | 1789.348 | 1762.836 | 107.7978 | 196.7361 | 0        | 169.4724 |
| 3635.973 | 16947.11 | 1173.282 | 732.2856 | 195.3799 | 2189.936 | 5955.244 | 9989.681 | 5988.692 | 19652.98 | 21831.17 | 18819.68 | 597.2482 | 2570.879 | 889.9466 | 3014.363 |
| 366.0397 | 94.47941 | 219.0164 | 46.56827 | 0        | 0        | 0        | 14.85783 | 0        | 0        | 81.13312 | 52.13214 | 0        | 0        | 48.78028 | 29.42352 |
| 1539.104 | 12900.84 | 396.8372 | 134.5294 | 146.2406 | 497.4178 | 5565.167 | 8160.472 | 4251.222 | 15127.33 | 9408.829 | 8145.705 | 172.971  | 468.611  | 0        | 430.4661 |
| 953.3549 | 7968.295 | 252.8037 | 59.67343 | 178.6516 | 169.9265 | 3311.387 | 6273.409 | 1540.684 | 14319.79 | 8363.825 | 7419.218 | 137.2653 | 1348.709 | 5.66701  | 544.0734 |
| 0        | 0        | 0        | 74.84814 | 20.29905 | 0        | 15.30595 | 0        | 0        | 1859.696 | 122.6625 | 2004.235 | 21.7608  | 662.09   | 0        | 297.9232 |
| 346.727  | 257.0536 | 66.12793 | 0        | 38.80648 | 0        | 46.79909 | 0        | 30.08699 | 0        | 30.66164 | 0        | 84.39412 | 1193.252 | 0        | 229.1885 |
| 344.0374 | 257.7807 | 65.44037 | 0        | 39.99337 | 0        | 47.00263 | 0        | 30.37286 | 0        | 30.67367 | 0        | 84.81232 | 1261.602 | 0        | 232.044  |
| 0        | 0        | 41.23393 | 0        | 0        | 0        | 337.9271 | 0        | 34.43089 | 0        | 0        | 0        | 0        | 0        | 0        | 174.3299 |
| 38.16206 | 7.915472 | 150.7032 | 42.03694 | 47.90544 | 359.6388 | 3615.289 | 5488.444 | 3298.758 | 9100.192 | 3968.476 | 6433.156 | 103.3801 | 216.9371 | 0        | 219.2041 |
| 0        | 11.66513 | 0        | 0        | 0        | 120.7336 | 0        | 0        | 34.4348  | 0        | 0        | 19.66864 | 0        | 0        | 0        | 0        |
| 0        | 0        | 0        | 0        | 0        | 0        | 0        | 0        | 0        | 0        | 0        | 0        | 0        | 0        | 0        | 0        |
| 0        | 0        | 125.2248 | 13.31053 | 39.14486 | 286.9588 | 2065.046 | 2410.28  | 2434.782 | 3065.801 | 1567.352 | 4660.873 | 73.02994 | 254.3628 | 0        | 343.3698 |
| 3451.087 | 17159.36 | 713.4154 | 468.1002 | 144.9703 | 1923.497 | 4641.238 | 9208.612 | 4882.056 | 19221.26 | 21686.25 | 18041.47 | 366.8181 | 2220.638 | 2085.115 | 2199.398 |
| 0        | 0        | 82.7602  | 4.470855 | 34.85797 | 239.1828 | 1239.508 | 1420.558 | 1546.751 | 1855.511 | 857.3654 | 3110.397 | 58.2018  | 195.3476 | 0        | 295.1083 |
| 0        | 0        | 82.7602  | 4.470855 | 34.85797 | 239.1828 | 1239.508 | 1420.558 | 1546.751 | 1855.511 | 857.3654 | 3110.397 | 58.2018  | 195.3476 | 0        | 295.1083 |
| 101.8726 | 218.1712 | 0        | 20.52051 | 3.839142 | 0        | 1024.039 | 2266.396 | 54.53843 | 4900.204 | 2593.289 | 100.4064 | 26.52552 | 0        | 0        | 0        |
| 102.6738 | 0        | 22.44635 | 0        | 43.09877 | 0        | 26.78642 | 0        | 0        | 0        | 72.81289 | 0        | 0        | 40.09125 | 0        | 57.96877 |
| 12.7007  | 0        | 55.25534 | 24.53783 | 51.54345 | 30.43228 | 2576.553 | 3378.341 | 3309.96  | 3262.769 | 1543.676 | 5226.651 | 70.45778 | 96.08864 | 0        | 177.6566 |
| 0        | 0        | 0        | 39.66924 | 59.82246 | 18.69062 | 1327.138 | 118.9744 | 89.14039 | 545.0861 | 310.1965 | 319.9115 | 0        | 0        | 0        | 0        |
| 1869.627 | 11801.19 | 451.8625 | 249.8879 | 108.6884 | 1247.485 | 3567.753 | 6729.322 | 3829.498 | 14284.76 | 11972.48 | 12776.09 | 244.5423 | 1229.926 | 595.376  | 1184.112 |
| 186.0699 | 746.1055 | 206.0802 | 0        | 134.7734 | 432.2727 | 4400.51  | 8567.564 | 4385.481 | 15126.91 | 7745.022 | 3867.916 | 184.3376 | 148.9334 | 0        | 436.9322 |
| 186.0699 | 746.1055 | 206.0802 | 0        | 134.7734 | 432.2727 | 4400.51  | 8567.564 | 4385.481 | 15126.91 | 7745.022 | 3867.916 | 184.3376 | 148.9334 | 0        | 436.9322 |
| 753.4607 | 6999.559 | 337.3155 | 62.34148 | 41.85697 | 827.1322 | 3932.473 | 6823.396 | 4573.558 | 7769.037 | 3120.996 | 2047.149 | 83.24624 | 224.2369 | 0        | 0        |
| 0        | 7.777957 | 0        | 0        | 0        | 80.99744 | 0        | 0        | 22.96842 | 0        | 0        | 13.11465 | 0        | 0        | 0        | 0        |

|          |          |          |          |          |          |          |          |          |          |          |          |          |          |          |          |
|----------|----------|----------|----------|----------|----------|----------|----------|----------|----------|----------|----------|----------|----------|----------|----------|
| 7.423041 | 0        | 97.30886 | 65.9817  | 58.16859 | 365.2218 | 2559.751 | 2578.276 | 3748.637 | 5378.119 | 1547.203 | 7226.847 | 110.0833 | 343.5026 | 0        | 467.1521 |
| 0        | 0        | 241.6745 | 0        | 72.70363 | 23.04617 | 3578.213 | 3628.044 | 5120.881 | 3646.26  | 1726.725 | 5626.097 | 98.18697 | 191.1365 | 0        | 223.2363 |
| 0        | 0        | 83.17596 | 0        | 18.32167 | 84.96402 | 989.3612 | 1426.706 | 1404.084 | 1678.514 | 767.5142 | 2690.405 | 26.16778 | 122.4178 | 0        | 8.885538 |
| 0        | 0        | 252.6015 | 0        | 86.47392 | 169.2466 | 3752.974 | 3642.578 | 5477.489 | 3676.102 | 1776.482 | 5669.876 | 103.5368 | 188.5804 | 0        | 243.9504 |
| 769.4372 | 4796.607 | 0        | 31.85714 | 86.29448 | 0        | 1157.244 | 2969.951 | 81.42115 | 8420.633 | 4255.38  | 194.6247 | 0        | 13.96908 | 0        | 0        |
| 16.64527 | 0        | 245.3019 | 36.59589 | 34.46083 | 0        | 18.23655 | 0        | 0        | 0        | 22.94586 | 41.25351 | 52.15578 | 28.1598  | 0        | 71.43573 |
| 0        | 0        | 12.52183 | 14.83417 | 5.69856  | 42.84373 | 1127.886 | 2019.736 | 470.7558 | 3168.844 | 1616.375 | 1646.229 | 66.30263 | 40.12521 | 0        | 120.1386 |
| 1920.01  | 11172.72 | 230.9525 | 131.1321 | 201.2526 | 1484.49  | 8714.773 | 10960.53 | 7442.032 | 18815.89 | 11139.32 | 11364.4  | 373.8344 | 16.4979  | 0        | 1169.64  |
| 31.35139 | 0        | 87.62776 | 11.89742 | 50.99986 | 0        | 22.73743 | 0        | 0        | 22.86498 | 30.12018 | 15.27668 | 21.01616 | 62.29181 | 0        | 118.6741 |
| 0        | 0        | 147.8565 | 0        | 51.15057 | 98.02317 | 2373.72  | 2267.48  | 3609.433 | 2235.836 | 1057.527 | 3569.534 | 61.36818 | 110.3726 | 0        | 145.0401 |
| 0        | 0        | 216.9752 | 0        | 46.0154  | 20.94273 | 785.0606 | 1857.035 | 146.0718 | 1976.006 | 943.7952 | 286.4949 | 156.8915 | 149.8557 | 0        | 269.2927 |
| 80.00247 | 145.0682 | 338.5453 | 11.17416 | 20.47155 | 290.1241 | 222.4133 | 0        | 24.81188 | 36.028   | 1064.88  | 0        | 20.39332 | 23.08779 | 0        | 217.0388 |
| 4.57424  | 16.93403 | 93.50097 | 0        | 13.96808 | 570.3674 | 3487.693 | 4363.196 | 3693.149 | 6613.712 | 2468.756 | 7125.623 | 133.5489 | 280.2696 | 3.211753 | 369.5345 |
| 27.46938 | 682.7647 | 156.4446 | 45.81039 | 116.4517 | 14.86326 | 135.5406 | 404.1065 | 49.64086 | 111.2279 | 803.5515 | 53.03671 | 57.13385 | 42.58893 | 192.4476 | 71.40012 |
| 0        | 0        | 71.99786 | 9.51167  | 30.94646 | 262.1573 | 1421.819 | 1731.701 | 1601.785 | 2211.146 | 802.8562 | 2789.944 | 47.0741  | 227.9569 | 0        | 150.6592 |
| 0        | 0        | 0        | 0        | 0        | 22.16391 | 0        | 0        | 10.94904 | 0        | 0        | 15.87592 | 0        | 0        | 0        | 0        |
| 0        | 0        | 64.36516 | 8.514008 | 27.78464 | 235.7733 | 1287.416 | 1559.014 | 1451.253 | 1993.208 | 717.9233 | 2531.099 | 42.13567 | 205.0661 | 0        | 135.4916 |
| 0        | 0        | 0        | 0        | 0        | 0        | 0        | 0        | 10.87001 | 0        | 0        | 15.81899 | 0        | 0        | 0        | 0        |
| 4.311964 | 0        | 68.12901 | 4.973075 | 34.82446 | 226.6615 | 1527.417 | 3020.055 | 2863.568 | 1084.935 | 429.5598 | 1517.957 | 62.53637 | 45.30173 | 0        | 154.8888 |
| 0        | 16.87479 | 92.32278 | 0        | 67.18272 | 552.4103 | 3360.933 | 4203.261 | 3374.539 | 6524.354 | 2415.775 | 6749.532 | 133.5673 | 276.8715 | 0        | 354.9119 |
| 985.5389 | 8199.837 | 144.4407 | 66.62617 | 91.4882  | 279.0067 | 3817.005 | 6421.378 | 4894.765 | 9673.126 | 4305.869 | 8304.593 | 186.6592 | 308.8116 | 5.340348 | 305.7984 |
| 0        | 0        | 0        | 20.52051 | 0        | 0        | 1024.039 | 2266.396 | 54.53843 | 4900.204 | 2593.289 | 100.4064 | 0        | 0        | 0        | 0        |
| 0        | 0        | 0        | 0        | 0        | 11.19228 | 0        | 0        | 5.478622 | 0        | 0        | 7.94317  | 0        | 0        | 0        | 0        |
| 17.26984 | 0        | 122.2164 | 0        | 0        | 0        | 315.8217 | 175.2859 | 29.03631 | 334.9144 | 1960.263 | 218.5154 | 0        | 14.99144 | 262.7091 | 33.33036 |
| 0        | 0        | 1831.138 | 0        | 0        | 0        | 9772.46  | 0        | 11345.35 | 21946.49 | 10964.52 | 14214.18 | 0        | 1363.47  | 50.68409 | 0        |
| 12.09802 | 0        | 85.75932 | 0        | 0        | 0        | 224.0672 | 123.0506 | 20.34668 | 238.0466 | 1425.414 | 153.7062 | 0        | 10.50201 | 185.8555 | 23.35214 |
| 170.5998 | 410.5962 | 135.9252 | 52.8769  | 241.3787 | 0        | 0        | 571.554  | 72.09191 | 4653.919 | 1739.535 | 1660.394 | 534.1217 | 179.5967 | 159.3789 | 186.8358 |
| 45.56784 | 0        | 0        | 0        | 0        | 0        | 0        | 0        | 0        | 0        | 162.3387 | 0        | 0        | 0        | 0        | 0        |
| 0        | 26.86475 | 13.09619 | 0        | 0        | 0        | 25.6537  | 26.99125 | 0        | 0        | 3964.271 | 1694.798 | 0        | 0        | 2.336138 | 0        |
| 1224.57  | 11296.9  | 240.9673 | 76.00903 | 162.5334 | 1035.442 | 6845.059 | 9652.635 | 8344.585 | 15873.47 | 7148.419 | 9646.88  | 294.5945 | 590.7065 | 0        | 395.8502 |
| 87.98731 | 0        | 421.3596 | 0        | 37.14295 | 948.0982 | 4725.858 | 5551.879 | 6557.534 | 955.8553 | 0        | 14.93395 | 0        | 359.6736 | 0        | 471.637  |
| 1452.983 | 4819.169 | 0        | 51.18231 | 62.22957 | 0        | 1165.733 | 678.7253 | 151.0128 | 5385.989 | 5655.127 | 416.0138 | 0        | 0        | 0        | 0        |
| 0        | 0        | 38.48985 | 0        | 0        | 22.56871 | 203.4891 | 0        | 21.39208 | 74.41496 | 716.632  | 42.10925 | 0        | 31.52971 | 10.65258 | 0        |
| 0        | 0        | 80.38773 | 68.23124 | 0        | 0        | 183.5446 | 0        | 16.735   | 55.04326 | 826.749  | 107.6493 | 16.83232 | 0        | 19.59147 | 34.73334 |
| 580.6704 | 573.2954 | 8915.384 | 1270.243 | 96.89724 | 0        | 85.54518 | 0        | 79.74397 | 0        | 2766.299 | 414.2655 | 43.17908 | 390.3596 | 0        | 132.3925 |

|          |          |          |          |          |          |          |          |          |          |          |          |          |          |          |          |
|----------|----------|----------|----------|----------|----------|----------|----------|----------|----------|----------|----------|----------|----------|----------|----------|
| 0        | 0        | 7.583835 | 40.17981 | 0        | 6.519115 | 193.7785 | 6.880518 | 7.240896 | 52.40859 | 118.6243 | 55.6924  | 24.9802  | 0        | 34.73578 | 19.88955 |
| 0        | 0        | 43.01295 | 0        | 0        | 0        | 0        | 16.65335 | 0        | 21.11111 | 112.5664 | 0        | 19.10964 | 0        | 16.93058 | 0        |
| 1067.628 | 7156.897 | 0        | 70.62938 | 81.57425 | 0        | 1777.451 | 4590.827 | 169.6032 | 10685.3  | 5893.039 | 317.1166 | 0        | 12.00959 | 0        | 0        |
| 0        | 38.2855  | 0        | 56.44563 | 114.313  | 0        | 4370.59  | 8079.71  | 350.1789 | 13558.15 | 4443.139 | 814.2414 | 0        | 0        | 0        | 0        |
| 0        | 0        | 0        | 0        | 0        | 0        | 343.1399 | 0        | 29.41368 | 0        | 0        | 599.2825 | 0        | 0        | 0        | 0        |
| 0        | 0        | 9.46289  | 0        | 40.99691 | 129.5878 | 1843.853 | 2338.269 | 2620.565 | 2006.035 | 943.3995 | 3120.692 | 42.68344 | 64.40262 | 0        | 295.5595 |
| 925.197  | 6084.233 | 0        | 39.52294 | 103.6548 | 0        | 1524.537 | 3859.741 | 102.6812 | 10713.33 | 5415.916 | 260.1458 | 0        | 14.01199 | 0        | 0        |
| 925.197  | 6084.233 | 0        | 39.52294 | 103.6548 | 0        | 1524.537 | 3859.741 | 102.6812 | 10713.33 | 5415.916 | 260.1458 | 0        | 14.01199 | 0        | 0        |
| 42.58173 | 0        | 0        | 0        | 0        | 0        | 0        | 0        | 41.45299 | 0        | 0        | 0        | 37.75862 | 183.022  | 0        | 1339.712 |
| 1156.966 | 11014.94 | 0        | 59.72839 | 28.77158 | 0        | 0        | 0        | 0        | 342.4003 | 38.88346 | 376.6042 | 0        | 0        | 0        | 20.77428 |
| 1614.367 | 15448.34 | 0        | 73.7465  | 23.66955 | 0        | 0        | 0        | 0        | 259.0679 | 29.23604 | 287.408  | 0        | 0        | 0        | 15.99727 |
| 0        | 0        | 9.46289  | 0        | 40.99691 | 55.17053 | 1843.853 | 2338.269 | 2620.565 | 1629.904 | 645.8854 | 2469.334 | 42.68344 | 44.61066 | 0        | 295.5595 |
| 0        | 0        | 0        | 0        | 0        | 0        | 0        | 0        | 0        | 0        | 15.25834 | 0        | 0        | 0        | 0        | 0        |
| 730.8274 | 77.18953 | 108.8774 | 823.9443 | 76.86911 | 472.0295 | 0        | 35.09774 | 0        | 0        | 112.1049 | 15.13216 | 15.75107 | 1061.216 | 0        | 27.59658 |
| 5.991813 | 0        | 10.10789 | 5.285741 | 0        | 0        | 1746.969 | 2360.391 | 262.0093 | 2415.364 | 1223.998 | 492.9086 | 0        | 0        | 0        | 0        |
| 39.81883 | 0        | 0        | 0        | 0        | 0        | 1015.197 | 3037.196 | 49.45116 | 3910.728 | 1948.952 | 35.44723 | 0        | 0        | 0        | 0        |
| 135.8935 | 118.3133 | 105.4694 | 81.58599 | 192.9682 | 809.8778 | 7453.798 | 9948.347 | 2485.643 | 21459.45 | 11240.1  | 11422.66 | 195.6317 | 53.0153  | 0        | 485.205  |
| 131.2647 | 139.2805 | 100.9097 | 81.36723 | 189.9809 | 786.8744 | 7394.537 | 9830.881 | 2393.395 | 22073.84 | 11507.15 | 11240.47 | 189.4067 | 50.63479 | 0        | 469.8274 |
| 400.1427 | 0        | 0        | 0        | 0        | 0        | 0        | 0        | 115.5513 | 0        | 0        | 0        | 110.2662 | 914.9549 | 0        | 172.8142 |
| 864.8088 | 4983.104 | 0        | 36.27319 | 80.37236 | 0        | 1328.051 | 3374.529 | 75.82491 | 9645.768 | 4992.645 | 238.5549 | 0        | 0        | 0        | 0        |
| 11.11719 | 0        | 126.2107 | 0        | 96.46686 | 0        | 0        | 0        | 0        | 0        | 0        | 0        | 0        | 78.82728 | 0        | 124.4785 |
| 375.2402 | 904.6274 | 0        | 0        | 94.51003 | 0        | 1224.934 | 3802.583 | 56.97546 | 14586.5  | 8834.785 | 0        | 0        | 0        | 0        | 0        |
| 0        | 0        | 0        | 0        | 0        | 0        | 0        | 0        | 54.86243 | 0        | 0        | 0        | 0        | 0        | 0        | 0        |
| 888.8072 | 6133.432 | 0        | 28.83021 | 74.62284 | 0        | 1332.892 | 3480.047 | 73.68717 | 9698.498 | 5056.212 | 327.3719 | 0        | 11.72215 | 0        | 0        |
| 273.536  | 765.7576 | 0        | 0        | 25.43456 | 0        | 860.6997 | 2487.606 | 48.36811 | 6793.299 | 3692.042 | 0        | 0        | 0        | 0        | 0        |
| 0        | 0        | 42.16796 | 0        | 0        | 0        | 0        | 16.62758 | 0        | 21.09748 | 111.6684 | 0        | 18.62005 | 0        | 0        | 0        |
| 116.4485 | 0        | 0        | 0        | 0        | 0        | 0        | 0        | 0        | 528.4389 | 135.4909 | 363.5587 | 0        | 0        | 0        | 0        |
| 0        | 0        | 0        | 26.19721 | 0        | 0        | 0        | 0        | 0        | 0        | 0        | 0        | 0        | 0        | 0        | 0        |
| 0        | 0        | 0        | 0        | 0        | 0        | 14.32029 | 0        | 0        | 0        | 0        | 0        | 0        | 0        | 0        | 0        |
| 30.15467 | 44.10686 | 0        | 0        | 0        | 0        | 26.27666 | 0        | 0        | 0        | 24.16346 | 0        | 0        | 0        | 0        | 0        |
| 346.5292 | 0        | 735.9232 | 0        | 0        | 0        | 1452.885 | 616.9418 | 3206.401 | 1908.232 | 464.8332 | 1851.004 | 2656.315 | 831.9006 | 504.0196 | 0        |
| 0        | 121.8748 | 0        | 0        | 0        | 0        | 0        | 0        | 0        | 3902.47  | 58.4448  | 0        | 0        | 0        | 0        | 0        |
| 0        | 121.8748 | 0        | 0        | 0        | 0        | 0        | 0        | 0        | 3902.47  | 58.4448  | 0        | 0        | 0        | 0        | 0        |
| 0        | 121.8748 | 0        | 0        | 0        | 0        | 0        | 0        | 0        | 3902.47  | 58.4448  | 0        | 0        | 0        | 0        | 0        |
| 382.3731 | 0        | 0        | 0        | 31.04481 | 153.9574 | 1323.556 | 2798.465 | 2230.52  | 1283.022 | 579.3743 | 1735.623 | 30.48826 | 1578.344 | 0        | 43.75481 |









| AP010_2  | AP010_3  | AP011_1  | AP011_2  | AP011_3  | AP013_1  | AP013_2  | AP013_3  | AP014_1  | AP014_2  | AP014_3  | AP015_1  | AP015_2  | AP015_3  | AP016_1  | AP016_2  |
|----------|----------|----------|----------|----------|----------|----------|----------|----------|----------|----------|----------|----------|----------|----------|----------|
| 6319100  | 18383590 | 13622054 | 20462495 | 15069308 | 17386411 | 19003576 | 15847472 | 10804151 | 18686749 | 12808587 | 13457366 | 18034658 | 11381907 | 12881934 | 10739537 |
| 37988016 | 78841815 | 64598239 | 49869801 | 66906617 | 60802393 | 48651538 | 48747714 | 53314065 | 69900718 | 50566968 | 52085767 | 57623161 | 46003904 | 94810936 | 87206329 |
| 25357.64 | 41513.13 | 60191.2  | 43040.88 | 59632.26 | 47594.94 | 43271.66 | 40615.25 | 46580.2  | 55491.14 | 42486.77 | 37766.85 | 39312.03 | 44845.31 | 60035.79 | 70509.02 |
| 13741.16 | 45092.1  | 36764.02 | 28812.21 | 41937.36 | 37490.49 | 32832.26 | 32178.53 | 21513.81 | 35351.31 | 22807.32 | 37702.02 | 32667.31 | 31044.84 | 33826.22 | 39307.46 |
| 16947.26 | 42559.18 | 41796.31 | 31858.62 | 46725.35 | 35521.8  | 32583.63 | 26137    | 24911.25 | 39249.02 | 26106.95 | 38246.22 | 42369.12 | 34672.05 | 40046.87 | 34686.53 |
| 14693.19 | 38028.43 | 43398.95 | 38567.82 | 44851.47 | 39047.4  | 35657.69 | 27693.02 | 22551.5  | 36744.82 | 27752.36 | 36887.87 | 41010.57 | 30580.54 | 28858.88 | 28777.31 |
| 14693.19 | 38028.43 | 43398.95 | 38567.82 | 44851.47 | 39047.4  | 35657.69 | 27693.02 | 22551.5  | 36744.82 | 27752.36 | 36887.87 | 41010.57 | 30580.54 | 28858.88 | 28777.31 |
| 14693.19 | 38028.43 | 43398.95 | 38567.82 | 44851.47 | 39047.4  | 35657.69 | 27693.02 | 22551.5  | 36744.82 | 27752.36 | 36887.87 | 41010.57 | 30580.54 | 28858.88 | 28777.31 |
| 16391.98 | 51275.22 | 36267.04 | 32322.01 | 44716.4  | 40829.92 | 30863.1  | 27106.44 | 22518.19 | 38840.91 | 24005.09 | 43620.99 | 45516.79 | 34341.8  | 40766.35 | 44201.36 |
| 15626.05 | 43190.42 | 40096.93 | 34691.62 | 37946.1  | 38413.58 | 30968.12 | 27819.85 | 21998.53 | 35264.79 | 26907.08 | 36537.53 | 44756.2  | 31759.91 | 31380.4  | 31858.95 |
| 14552.38 | 37885.88 | 37246.71 | 33482.77 | 41184.47 | 35761.05 | 30385.09 | 24922.39 | 20954.04 | 38041.14 | 24136.24 | 32525    | 40258.03 | 29973.94 | 29199.92 | 29108.52 |
| 12251.87 | 37575.63 | 40509.39 | 34717.26 | 42661.07 | 37283.72 | 32827.3  | 26964.12 | 21286.77 | 34472.04 | 25427.93 | 34173.9  | 36001.73 | 30117.69 | 29090.5  | 30320.58 |
| 11977.25 | 33559.91 | 37995.27 | 30244.23 | 41664.21 | 30291.8  | 27531.1  | 26046.04 | 20116.79 | 26230    | 24562.06 | 31148.37 | 29318.92 | 29100.66 | 27233.65 | 26028.46 |
| 15080.86 | 40646.73 | 37947.07 | 32639.87 | 41096.86 | 37838.34 | 33009.11 | 26856.87 | 21666.98 | 36151.85 | 25061.83 | 33317.51 | 35675.91 | 31916.23 | 33643.35 | 33302.74 |
| 14405.69 | 40286.54 | 37724.49 | 32525.26 | 40960.85 | 38106.29 | 33012.76 | 25842.21 | 20866.66 | 36785.99 | 23874.83 | 33296.51 | 38740    | 30490.82 | 31644.17 | 31713.7  |
| 15383.3  | 42886.2  | 29598.17 | 24579.2  | 39762.51 | 34183.77 | 31219.62 | 26922.26 | 23887.07 | 34212.22 | 24829.07 | 36033.91 | 30046.38 | 25840.48 | 33796.55 | 35212.25 |
| 14145.65 | 39693.92 | 39169.05 | 31796.75 | 42539.97 | 39125.3  | 37444.22 | 28623.19 | 23933.26 | 37926.77 | 27618.21 | 36005.25 | 38613.05 | 30568.53 | 31584.41 | 32152.05 |
| 10255.37 | 36521.5  | 36430.92 | 27766.27 | 42988.66 | 33091.41 | 27745.03 | 28280.88 | 20551.89 | 33229.77 | 23918.16 | 31849.54 | 35113.78 | 33166.31 | 29105.43 | 32410.65 |
| 14373.11 | 40083.24 | 37698.92 | 32751.75 | 41097.25 | 37946.13 | 34395.26 | 25937.18 | 20891.93 | 36289.13 | 24284.14 | 33261.8  | 38387.03 | 30888.55 | 32392.15 | 32353.68 |
| 16741.73 | 41250.62 | 37550.75 | 29824.11 | 39448.92 | 37956.05 | 32251.74 | 28706.44 | 23995.19 | 39600.8  | 27819.89 | 33846.74 | 32415.96 | 31064.05 | 34523.82 | 35515.68 |
| 13829.59 | 40266.42 | 35893.54 | 32018.01 | 40387.81 | 34424.04 | 31463.11 | 26306.74 | 20160.13 | 33079.37 | 23453.35 | 32857.13 | 31461.78 | 23881.79 | 33361.6  | 34210.75 |
| 14097.89 | 39752.15 | 37797.89 | 32918.67 | 41027.11 | 38065.72 | 34507.27 | 25848.01 | 20785.07 | 34970.88 | 24194.82 | 33563.33 | 37373.37 | 31058.98 | 32107.55 | 32078.75 |
| 13436.8  | 39306.72 | 37020.32 | 32764.38 | 41068.37 | 37833.3  | 34369.13 | 25313.08 | 20424.32 | 34240.79 | 23141.04 | 32952.35 | 34427.14 | 30668.47 | 31613.68 | 31813.45 |
| 13665.03 | 39359.45 | 34796.01 | 31111.91 | 39299.3  | 33883.35 | 30956.08 | 25774.75 | 19701.03 | 32596.38 | 23123.49 | 33150.37 | 30693.08 | 27856.29 | 32989.99 | 33332.53 |
| 13665.03 | 39359.45 | 34796.01 | 31111.91 | 39299.3  | 33883.35 | 30956.08 | 25774.75 | 19701.03 | 32596.38 | 23123.49 | 33150.37 | 30693.08 | 27856.29 | 32989.99 | 33332.53 |
| 22166.39 | 50083.36 | 28243.7  | 18114.32 | 33430.37 | 29992.41 | 19331.52 | 28322.49 | 24531.51 | 35780.68 | 20214.45 | 32693.37 | 30238.2  | 31024.14 | 64914.21 | 56516.74 |
| 12509.04 | 34712.15 | 36731.75 | 30923.69 | 38399.56 | 33377.49 | 27827.27 | 25318.8  | 20789.56 | 34576.43 | 24719.81 | 33035.7  | 36670.73 | 29066.56 | 27308.13 | 27652.82 |
| 13975.36 | 37183.34 | 35961.75 | 30121.89 | 40004.37 | 34548.5  | 30348.31 | 23041.57 | 20302.03 | 35044.12 | 23354.3  | 31192.66 | 38420.42 | 23713.61 | 29716.67 | 28579.83 |
| 13116.06 | 35931.27 | 37322.02 | 32815.3  | 39286.53 | 37476.18 | 32621.67 | 25638.91 | 20217.58 | 34139.86 | 24628.18 | 31940.45 | 34127.72 | 28072.4  | 30103    | 29645.86 |
| 17201.79 | 38116.31 | 36458.47 | 29222.79 | 38116.6  | 32238.59 | 24992.44 | 23550.56 | 21042.43 | 33570.94 | 25035.9  | 31845.47 | 36716.48 | 30679.34 | 37170.69 | 35721.53 |
| 17201.79 | 38122.5  | 36458.47 | 29222.79 | 38116.6  | 32238.59 | 24992.44 | 23550.56 | 21042.43 | 33570.94 | 25035.9  | 31845.47 | 36716.48 | 30679.34 | 37173.39 | 35721.72 |
| 13604.81 | 34410.9  | 37346.97 | 32224.2  | 43336.41 | 36809.33 | 32416.67 | 27132.93 | 21819.75 | 35060.72 | 27548.94 | 32242.58 | 33735.71 | 30055.55 | 29410.81 | 29785.32 |
| 12273.41 | 34094.18 | 36027.76 | 29925.14 | 39164.24 | 32054.2  | 27217.75 | 24366.63 | 20425.67 | 32623.76 | 23667.56 | 31697.87 | 33725.86 | 27870.71 | 27128.33 | 27320.04 |

|          |          |          |          |          |          |          |          |          |          |          |          |          |          |          |          |
|----------|----------|----------|----------|----------|----------|----------|----------|----------|----------|----------|----------|----------|----------|----------|----------|
| 11763.37 | 33451.88 | 34822.86 | 29334.17 | 35661.03 | 31986.02 | 26354.23 | 24366.63 | 19986.63 | 32479.64 | 23667.56 | 30837.73 | 33725.86 | 27630.55 | 25835.94 | 26501.35 |
| 15059.98 | 39127.15 | 36149.05 | 30647.26 | 42266.5  | 36945.4  | 32529    | 26508.04 | 22187.4  | 34187.33 | 25199.64 | 32919.74 | 30030.24 | 31587.68 | 32334.52 | 31784.68 |
| 12351.48 | 34094.92 | 35989.33 | 26260.09 | 31052.5  | 29595.98 | 17165.77 | 18963.5  | 14748.52 | 30730.94 | 21340.21 | 24903.48 | 49430.07 | 15264.18 | 30439.19 | 15694.57 |
| 14558.05 | 35738.98 | 33131.47 | 29762.73 | 36644.22 | 32150.25 | 28856.22 | 23259.91 | 19097.73 | 30486.67 | 22684.01 | 30730.02 | 33893.9  | 28957.3  | 25521.63 | 25866.79 |
| 14285.18 | 39419.36 | 32448.05 | 28933.85 | 40287.02 | 32203.04 | 30573.4  | 23843.93 | 18990.14 | 29833.91 | 21881.8  | 31807.4  | 31078.96 | 27635.4  | 26113.09 | 29112.16 |
| 13739.59 | 39892.65 | 24154.43 | 19677.64 | 34774.27 | 29098.99 | 27181.87 | 24020.58 | 22449.15 | 29852.98 | 21749.32 | 32069.87 | 23920.96 | 21420.06 | 32159.81 | 33953.76 |
| 13671.71 | 33008.21 | 33050.2  | 28034.6  | 35672.88 | 31446.75 | 28079.51 | 20880.25 | 19216.22 | 30883.97 | 21927.32 | 26555.65 | 34939.74 | 19272.67 | 29477.88 | 28224.82 |
| 10505.75 | 36836.69 | 32985.19 | 25549.24 | 38145.32 | 32389.55 | 29609.74 | 26979.01 | 20287.83 | 25551.88 | 22369.53 | 27627.62 | 20137.32 | 23301.59 | 30158.59 | 35518.98 |
| 12772.73 | 33129.08 | 31939.5  | 27451.91 | 38505.09 | 31231.92 | 28762.09 | 24544.18 | 20205.47 | 28266.68 | 23354.13 | 30755.88 | 24702.29 | 31519.02 | 27497.49 | 29259.82 |
| 11163.54 | 35945.89 | 35193.28 | 34326.07 | 39974.14 | 31959.66 | 30232.73 | 24514.03 | 20119.25 | 30441.5  | 22983    | 28179.78 | 24777.25 | 20415    | 26603.16 | 28036.12 |
| 12613.76 | 38931.66 | 33417.55 | 30041.63 | 31695.09 | 31903.02 | 26967.81 | 24932.01 | 20173.58 | 33867.69 | 22746.49 | 33028.67 | 34278.89 | 25275.47 | 31459.75 | 31242.58 |
| 11211.15 | 34574.94 | 31301.5  | 24738.44 | 33645.37 | 32509.48 | 25406.12 | 23240.63 | 17532.09 | 26807.96 | 22433.2  | 29222.66 | 30052.29 | 30380.03 | 28001.08 | 31680.81 |
| 13840.44 | 34978.65 | 34645.9  | 29642.99 | 43159.38 | 34614.82 | 30740.14 | 23558.28 | 21171.27 | 32167.68 | 24722.55 | 32714.96 | 30274.98 | 30379.53 | 30884.38 | 32397.62 |
| 12055.23 | 32742.93 | 33388.44 | 27922.75 | 37784.19 | 31435.47 | 28189.88 | 24368.16 | 19808.2  | 29081.39 | 23331.24 | 30077.73 | 26245.98 | 28976.42 | 26243.23 | 27166.67 |
| 10779.35 | 35485.97 | 34730.03 | 34192.14 | 39504.99 | 31660.97 | 29908.23 | 24301.76 | 19862.72 | 29300.47 | 22585.53 | 27262.17 | 23387.84 | 19035.93 | 26255.8  | 27838.44 |
| 14547.8  | 32536.82 | 35034.16 | 26255.08 | 38673.04 | 31526.54 | 29759.42 | 23434.98 | 21349.9  | 31302.71 | 21662.59 | 26035.18 | 31293.81 | 24189.1  | 29042.85 | 20978.37 |
| 14343.16 | 35952.57 | 27216.73 | 19557.15 | 28632.35 | 23379.21 | 13833    | 20392.03 | 10138.79 | 21700.97 | 15386.77 | 28929.4  | 33376.84 | 22275.15 | 22239.35 | 25031.91 |
| 9959.218 | 34021.58 | 31098.17 | 24186.01 | 36059.33 | 30548.88 | 28222.71 | 25218.52 | 20021.76 | 23753.2  | 22014.99 | 25231.58 | 18012.4  | 21832.41 | 29109.54 | 33637.35 |
| 11507.87 | 35542.25 | 26791.13 | 20539.57 | 35003.45 | 27403.48 | 22800.45 | 21159.71 | 17816.93 | 24594.12 | 18816.6  | 28191.66 | 21860.5  | 24081.4  | 32372.62 | 32119.19 |
| 9338.898 | 32236.27 | 23239.79 | 17770.71 | 29570.54 | 25106.79 | 21150.62 | 17884.51 | 17184.99 | 27893    | 17617.04 | 25034.73 | 25292.36 | 14365.25 | 24569.83 | 28874.06 |
| 12920.52 | 38254.08 | 21823.76 | 17515.2  | 32049.31 | 26832.04 | 25857.67 | 22819.72 | 22136.22 | 28065.86 | 20166.8  | 29723.39 | 21281.89 | 19374.05 | 32698.55 | 34724.29 |
| 13470.37 | 31181.77 | 33920.48 | 25476.6  | 37518.44 | 30969.31 | 29448.48 | 22931.45 | 20626.5  | 29650.1  | 20774.36 | 24379.93 | 29260.2  | 22583.52 | 27311.84 | 19548.02 |
| 13295.84 | 30740.41 | 29715.1  | 23888.96 | 32187.94 | 27977.12 | 24175.12 | 20583.9  | 16337.42 | 26591.09 | 19955.87 | 26290.05 | 28997.93 | 24337.07 | 23989.76 | 20958.53 |
| 8284.394 | 28719.73 | 23775.91 | 21060.07 | 33296.62 | 25130.78 | 23432.8  | 20646.13 | 17288.62 | 19683.99 | 20715.76 | 24063.03 | 14386.1  | 27757.92 | 22605.05 | 26544.05 |
| 12427.55 | 33384.89 | 25454.05 | 21536.76 | 32710.16 | 28285.38 | 26799.15 | 20376.56 | 17660.43 | 28185.11 | 19578.61 | 26996.55 | 23798.84 | 15880.43 | 29707.19 | 28260.64 |
| 9348.309 | 35949.05 | 20762.13 | 16261.18 | 29789.58 | 26012.81 | 19910.16 | 20520.37 | 15021.83 | 22212.8  | 18382.2  | 24610.77 | 15400.23 | 20129.72 | 31292.88 | 36249.36 |
| 11989.98 | 36380.31 | 19336.14 | 15412.24 | 29459.56 | 24250.86 | 23539.13 | 21117.2  | 21104.5  | 25651.42 | 18532.46 | 27599.82 | 18673.19 | 17314.08 | 31302.48 | 33563.93 |
| 11098.19 | 32717.86 | 26943.84 | 21991.38 | 32215.49 | 28473.85 | 25036.28 | 21244.63 | 17140.95 | 22929.84 | 19322.73 | 23314.61 | 21931.49 | 20020.88 | 27646.53 | 29686    |
| 12801.99 | 27961.14 | 31658.07 | 23456.99 | 34726.29 | 28891.88 | 27794.93 | 21541.74 | 19151.45 | 27275.29 | 19252.48 | 21602.28 | 26489.32 | 20061.97 | 24209.59 | 16639.33 |
| 12019.65 | 27353.01 | 25727.07 | 17580.97 | 30308.8  | 26859.85 | 22707.74 | 20650.55 | 16867.03 | 22172.41 | 20139.31 | 24986.67 | 23239.53 | 17388.38 | 26908.11 | 26019.38 |
| 18360.48 | 30688.5  | 24115.62 | 15938.37 | 27598.98 | 28820.1  | 24626.22 | 18796.45 | 18775.76 | 30581.74 | 18864.52 | 29444.83 | 36845.58 | 19528.99 | 33795.84 | 31775.22 |
| 7975.027 | 28456.44 | 21167.35 | 15305.18 | 28731.92 | 19099.16 | 16819.41 | 17906.44 | 13739.4  | 14131.31 | 17269.78 | 23315.81 | 12476.38 | 26913.92 | 25998.86 | 30893.88 |
| 13257.12 | 30406.78 | 24472.45 | 18907.64 | 17967.72 | 21627.13 | 14327.08 | 12024.46 | 14244.51 | 26422.31 | 15106.28 | 26401.27 | 37036.15 | 7926.13  | 21865.64 | 13181.7  |
| 11418.79 | 35491.2  | 14873.03 | 11794.58 | 25244.52 | 20068.01 | 19457.8  | 18494.65 | 19936.49 | 21936.52 | 15602.14 | 24726.73 | 14555.97 | 14079.39 | 32566.35 | 35978.41 |
| 11418.79 | 35491.2  | 14873.03 | 11794.58 | 25244.52 | 20068.01 | 19457.8  | 18494.65 | 19936.49 | 21936.52 | 15602.14 | 24726.73 | 14555.97 | 14079.39 | 32566.35 | 35978.41 |

|          |          |          |          |          |          |          |          |          |          |          |          |          |          |          |          |
|----------|----------|----------|----------|----------|----------|----------|----------|----------|----------|----------|----------|----------|----------|----------|----------|
| 11437.18 | 27067.48 | 21798.15 | 13698.78 | 22521.49 | 23392.64 | 21162.09 | 19189.7  | 18321.08 | 24956.3  | 17742.04 | 11089.2  | 12891.93 | 19263.42 | 25242.34 | 23465.63 |
| 7134.53  | 27291.96 | 20651.84 | 13461.93 | 23776.75 | 22874.27 | 16939.62 | 21497.76 | 14879.66 | 17894.69 | 16751.89 | 15845.45 | 9262.738 | 9265.441 | 24051.27 | 27975.43 |
| 4789.403 | 30989.51 | 18223.04 | 11592.02 | 18656.74 | 20492.25 | 15451.59 | 16908.91 | 12383.89 | 13106.01 | 11157.73 | 16223.55 | 12278.87 | 17552.74 | 28890.04 | 30364.89 |
| 12123.58 | 26304.55 | 20683.23 | 12667.22 | 21248.58 | 22455.12 | 20162.96 | 18570.01 | 18402.69 | 24494.04 | 17313.32 | 10161.81 | 11994.63 | 18476.16 | 25767.95 | 23191.82 |
| 9382.342 | 23870.48 | 24001.94 | 18849.91 | 20267.43 | 23493.73 | 18819.45 | 16899.34 | 12622.4  | 22197.94 | 14922.94 | 14623.38 | 22283.86 | 13022.3  | 27609.88 | 21521.49 |
| 12808.59 | 25803.47 | 27093.34 | 18978.35 | 19757.16 | 21109.94 | 13220.83 | 13444.22 | 13503.55 | 22187.19 | 14582.94 | 17607.48 | 24192.52 | 12554.47 | 27056.61 | 14423.33 |
| 6267.458 | 23162    | 23429.65 | 16065.89 | 23597.75 | 18800.4  | 17271.07 | 18366.66 | 10831.62 | 21721.14 | 17242.56 | 14352.96 | 17854.49 | 16013.63 | 18995.98 | 15885.51 |
| 11105.31 | 22604.08 | 21197.32 | 15245.27 | 15645.71 | 17124.58 | 10647.55 | 9262.168 | 11131.52 | 15009.62 | 7731.959 | 9363.545 | 11908.07 | 15573.14 | 30016    | 27421.97 |
| 7238.149 | 24752.81 | 21961.61 | 21348.52 | 25837.99 | 25226.75 | 21064.13 | 21034.19 | 13507.75 | 20745.23 | 17424.02 | 18443.92 | 15676.57 | 13232.07 | 15820.87 | 21311.68 |
| 13402.33 | 25767.73 | 18535.87 | 13884.48 | 11603.85 | 19466.1  | 14630.71 | 12470.44 | 12593.86 | 32034.02 | 14953.83 | 22649.18 | 39916.01 | 9772.428 | 22680.74 | 16210.89 |
| 9933.505 | 19979.98 | 24373.66 | 19478.76 | 21676.79 | 22517.96 | 19329.76 | 11979.06 | 11520.16 | 25520.96 | 13864.01 | 16885.55 | 34998.54 | 5912.59  | 20580.14 | 12445.46 |
| 11872.67 | 22897.06 | 18625.19 | 11703.01 | 10913.15 | 17062.82 | 15315.08 | 17995.87 | 14753.33 | 19169.28 | 13336.24 | 5583.345 | 8056.257 | 8133.804 | 29015.07 | 27314.74 |
| 508.9788 | 24726.96 | 18682.93 | 17809.25 | 22875.15 | 21008.69 | 17137.59 | 16942.18 | 11133.21 | 15555.11 | 10979.73 | 17846.71 | 10937.81 | 12762.53 | 16739.79 | 20772.15 |
| 2781.328 | 28915.37 | 7939.332 | 5812.428 | 20830.3  | 16241.54 | 12861.56 | 12118.99 | 10045.32 | 18501.71 | 7492.496 | 19953.05 | 10902.02 | 11008.63 | 21040.37 | 26397.54 |
| 11202.63 | 22917.26 | 18429.08 | 11674.01 | 10910.46 | 16946.62 | 15247.09 | 17923.67 | 14603.12 | 18631.01 | 13057.83 | 5535.821 | 7778.539 | 7989.606 | 27740.69 | 26698.43 |
| 4572.96  | 23929.38 | 16595.76 | 20633.8  | 20434.45 | 19806.55 | 17648.05 | 11409.48 | 9360.854 | 16676.92 | 8139.309 | 16155.79 | 17527.31 | 6994.645 | 24912.95 | 20096.58 |
| 6912.652 | 20549.06 | 20581.31 | 13051.02 | 20054.27 | 15008.29 | 14198.35 | 16475.02 | 8685.09  | 20846.23 | 15700.09 | 11756.24 | 22458.99 | 12588.81 | 16985.69 | 12311.78 |
| 9899.671 | 19638.4  | 23600.57 | 18233.66 | 18247.8  | 22287.2  | 19033.83 | 11854.88 | 11086.38 | 23014.9  | 13489.33 | 15150.56 | 28973.79 | 5864.018 | 20428.44 | 12331.31 |
| 8983.895 | 20634.69 | 22347.07 | 17151.72 | 19610.76 | 19346.81 | 14438.86 | 13168.02 | 10808.2  | 18657.63 | 12646.92 | 16892.96 | 18057.62 | 7513.602 | 19340.79 | 14895.52 |
| 9708.945 | 19365.02 | 22656.28 | 17804.24 | 22431.87 | 21104.97 | 21015.38 | 10960.13 | 10559.81 | 23939.05 | 11819.24 | 16325.16 | 34977.62 | 5843.696 | 20800.86 | 12080.51 |
| 7182.554 | 17931.93 | 20805.26 | 9863.077 | 21417.27 | 18254.9  | 22174.62 | 20591    | 29794.89 | 24295.99 | 16638.59 | 11941.08 | 25255.44 | 4361.145 | 0        | 14838.75 |
| 8073.884 | 20668.88 | 20546.56 | 14639.31 | 14232.78 | 13910.73 | 7854.747 | 14748.5  | 10468.54 | 19556.08 | 15176.66 | 14133.17 | 18367.23 | 20270.22 | 16368.62 | 12233.22 |
| 8227.142 | 17757.82 | 16101.08 | 13499.94 | 19899.49 | 20121.73 | 19923.42 | 11959.75 | 12371.01 | 18683.66 | 14248.51 | 18619.07 | 15898.94 | 5934.645 | 15293.33 | 10321.52 |
| 5934.543 | 20707.04 | 18850.79 | 12437.6  | 11558.78 | 12526.06 | 5657.52  | 15061.26 | 7409.098 | 18201.56 | 13100.16 | 11410.99 | 19721.64 | 15546.47 | 12931.36 | 10335.21 |
| 8514.14  | 19656.7  | 17456.47 | 12254.98 | 10777.39 | 15875.43 | 12710.72 | 10785.54 | 13263.9  | 17375.69 | 10612.38 | 6625.159 | 9201.322 | 6923.503 | 21607.39 | 14580.48 |
| 9686.332 | 19224.95 | 20781.49 | 13397.02 | 24131.86 | 14664.76 | 17660.59 | 12875.18 | 15287.87 | 17972.36 | 15589.82 | 18504.93 | 13727.96 | 18753.96 | 18692.8  | 15843.85 |
| 3536.852 | 21555.08 | 4275.344 | 4677.5   | 17192.98 | 16155.33 | 13897.73 | 10006.98 | 5831.96  | 9619.308 | 2204.602 | 14845.23 | 9536.163 | 5070.128 | 22980.95 | 16375.9  |
| 19039.01 | 23098.26 | 17384.34 | 9613.575 | 19521.45 | 21965.45 | 19862.59 | 13826.91 | 16790.8  | 26988.79 | 14765.63 | 24322.12 | 34728.06 | 12841.93 | 35107    | 30011.96 |
| 9634.128 | 16637.76 | 18813.96 | 14107.31 | 15476.96 | 15017.92 | 10828.23 | 10649.45 | 9194.221 | 20398.3  | 9729.8   | 12755.38 | 28424.95 | 5310.956 | 18996.92 | 13456.37 |
| 11379.43 | 20489.3  | 14845.67 | 10372.06 | 16472.13 | 18070.4  | 14516.91 | 11408.14 | 12428.93 | 17793.16 | 10672.19 | 15770.73 | 14234.27 | 8484.158 | 25678.86 | 21693.28 |
| 7722.293 | 16516.1  | 14638.24 | 8654.528 | 9199.822 | 10869.12 | 7391.145 | 14692.5  | 11958.85 | 11001.65 | 9843.786 | 3598.642 | 2460.625 | 15605.65 | 23562.65 | 23269.85 |
| 5840.356 | 16162.15 | 12779.54 | 6768.354 | 11850.59 | 14215.64 | 10478.42 | 13876.34 | 9440.22  | 14862.72 | 12516.99 | 12379.65 | 15603.66 | 8828.275 | 20481.62 | 23159.27 |
| 8203.647 | 17117.11 | 21462.86 | 12289.86 | 26738.81 | 14049.35 | 18333.09 | 12558.16 | 15010.6  | 16717.7  | 18230.06 | 17130.64 | 11638.23 | 19616.02 | 16249.33 | 13895.28 |
| 14427.24 | 21191.31 | 15757.57 | 10162.37 | 18103.09 | 18657.26 | 17167.56 | 12973.31 | 15955.06 | 20830.1  | 13380.84 | 18562.13 | 20163.45 | 10176.58 | 31826.57 | 29063.05 |
| 9535.337 | 15820.43 | 14860.12 | 9708.208 | 9037.879 | 11089.66 | 6378.396 | 6333.415 | 7696.879 | 9379.845 | 4750.973 | 5914.355 | 8143.074 | 9841.664 | 25993.24 | 19087.32 |

|          |          |          |          |          |          |          |          |          |          |          |          |          |          |          |          |
|----------|----------|----------|----------|----------|----------|----------|----------|----------|----------|----------|----------|----------|----------|----------|----------|
| 9535.337 | 15819.72 | 14860.12 | 9708.208 | 9037.879 | 11089.66 | 6378.396 | 6333.415 | 7696.879 | 9379.845 | 4750.973 | 5914.355 | 8143.074 | 9841.664 | 25992.36 | 19087.28 |
| 1731.918 | 21974.74 | 6416.837 | 4845.967 | 14897.74 | 14201.92 | 11417.66 | 10727.33 | 7299.014 | 10421.09 | 1602.891 | 8067.985 | 7742.94  | 9220.325 | 19704.22 | 20431.01 |
| 7455.376 | 18366.79 | 6962.548 | 7485.379 | 10742.98 | 14946.39 | 11908.79 | 8346.445 | 8291.589 | 12285.32 | 7945.89  | 15104.5  | 20531.71 | 11174.32 | 23098.12 | 17773.04 |
| 19489.8  | 20234.69 | 15555.76 | 8465.448 | 16345.93 | 19150.08 | 18262.3  | 11584.33 | 16899.21 | 23866.64 | 12056.27 | 19175.53 | 29010.27 | 10268.92 | 36585.07 | 30970.44 |
| 381.9884 | 18685.28 | 14501.72 | 18927.72 | 17681.56 | 17457.61 | 15578.19 | 7807.006 | 8058.035 | 14532.76 | 7256.315 | 14117.42 | 15681.2  | 5452.559 | 15975.96 | 11616.07 |
| 8195.99  | 13201.07 | 13207.53 | 7790.414 | 13106.46 | 10657.04 | 5710.114 | 15550.29 | 4888.721 | 5376.073 | 7938.344 | 4544.909 | 3022.342 | 7243.107 | 16183.7  | 14455.14 |
| 8195.99  | 13201.07 | 13207.53 | 7790.414 | 13106.46 | 10657.04 | 5710.114 | 15550.29 | 4888.721 | 5376.073 | 7938.344 | 4544.909 | 3022.342 | 7243.107 | 16183.7  | 14455.14 |
| 3949.596 | 20853.6  | 8753.738 | 6625.669 | 10539.86 | 10250.64 | 7292.367 | 7638.717 | 9512.711 | 9332.505 | 5383.972 | 7631.527 | 13077.49 | 6425.831 | 17677.68 | 16116.77 |
| 1098.115 | 19557.55 | 13616.3  | 8661.306 | 17967.6  | 10907.21 | 8547.693 | 13816.02 | 9045.96  | 5435.602 | 8679.276 | 9316.146 | 5445.036 | 7088.57  | 19543.58 | 13695.79 |
| 11424.06 | 17946.58 | 16125.21 | 12858.99 | 10516.33 | 14284.58 | 7686.722 | 8235.088 | 8641.768 | 20751.21 | 9021.996 | 15078.24 | 25307.18 | 5053.785 | 19675.96 | 13212.27 |
| 11067.87 | 19736.27 | 12457.85 | 6321.919 | 16228.65 | 14918.14 | 16364.17 | 12330.08 | 16390.16 | 20369.71 | 12568.88 | 9116.75  | 12434.89 | 11205.29 | 15731.63 | 6349.4   |
| 16304.74 | 28274.07 | 18724.2  | 17264.65 | 16187.23 | 21011.41 | 13536.95 | 16598.2  | 12716.09 | 22512.64 | 9678.046 | 19691.4  | 32738.54 | 13315.3  | 39471.45 | 29499.99 |
| 11818.51 | 17651.19 | 16617.46 | 16585.11 | 19573.65 | 15061.17 | 21000.24 | 8736.032 | 9812.369 | 18625.6  | 10652.36 | 14230.24 | 20435.48 | 7547.601 | 20552.05 | 17841.03 |
| 5468.931 | 18092.16 | 4981.741 | 3410.677 | 10832.4  | 10217.61 | 8345.033 | 8168.286 | 6207.644 | 11568.19 | 4637.877 | 5779.977 | 5610.567 | 7314.539 | 17768.69 | 18255.47 |
| 7265.399 | 14591.68 | 12017.34 | 7441.86  | 9346.169 | 12237.05 | 8281.809 | 8620.597 | 8516.669 | 13671.89 | 9826.734 | 11814.68 | 14424.54 | 9185.565 | 18681.59 | 13868.21 |
| 9336.523 | 13361.29 | 16679.45 | 10061.87 | 10373.94 | 10355.51 | 6078.196 | 8169.882 | 7633.549 | 9091.087 | 8530.375 | 7855.698 | 7971.804 | 5890.043 | 11080.7  | 9297.729 |
| 2000.361 | 8850.141 | 19407.34 | 14291.65 | 5132.422 | 12555.48 | 7234.224 | 10408.03 | 4315.012 | 6437.648 | 10951.18 | 1698.555 | 5088.453 | 1843.175 | 4294.116 | 3188.224 |
| 4035.92  | 10526.58 | 11336.35 | 7631.327 | 7234.807 | 9550.271 | 6361.532 | 12058.82 | 9207.416 | 21617.91 | 11157.02 | 8298.431 | 14690.74 | 9281.823 | 23349.57 | 21042.54 |
| 8750.243 | 26608.24 | 14176.1  | 10763.87 | 16914.21 | 18776.44 | 14515.93 | 13924.6  | 8668.737 | 10876.53 | 2444.832 | 6931.289 | 4288.91  | 11475.2  | 26108.14 | 26567.94 |
| 9437.313 | 27927.75 | 14892.08 | 11181.72 | 16827.99 | 21071.24 | 15499.07 | 14751.02 | 8732.119 | 11177.32 | 2318.457 | 6655.533 | 4226.87  | 10952.03 | 28086.49 | 27722.18 |
| 8483.588 | 17189.76 | 10055.03 | 8286.775 | 10225.94 | 14579.28 | 11139.61 | 10580.85 | 12008.15 | 14249.7  | 8649.131 | 5647.76  | 6371.638 | 7201.885 | 24417.55 | 18284.97 |
| 8613.445 | 26431.87 | 13540.43 | 10008.48 | 15596.4  | 18640.79 | 13587.6  | 13632.26 | 7969.735 | 10033.99 | 2125.357 | 6148.253 | 3805.752 | 10379.42 | 26265.39 | 26344.73 |
| 5191.089 | 12557.03 | 8343.888 | 5902.632 | 8372.3   | 9211.002 | 6306.953 | 6118.04  | 8601.435 | 8058.661 | 4698.574 | 6466.296 | 8547.629 | 5663.182 | 16622.34 | 9635.901 |
| 11272.46 | 15050.63 | 10350.43 | 11245.37 | 3887.522 | 9189.854 | 5277.329 | 5557.974 | 8697.776 | 18230.81 | 6808.843 | 14768.67 | 23048.26 | 5099.111 | 19466    | 13875.03 |
| 9330.58  | 27146.26 | 13819.2  | 10381.71 | 15645.28 | 20001.25 | 14487.55 | 13802.39 | 8004.622 | 10334.71 | 2053.567 | 6030.553 | 3807.895 | 10225.69 | 27700.19 | 26805.18 |
| 9929.211 | 15967.58 | 11228.03 | 10026.99 | 14293.82 | 18707.69 | 15894.97 | 11821.91 | 14406.82 | 20590.97 | 13293.7  | 7679.071 | 10941.77 | 10051.35 | 22151.81 | 19437.53 |
| 5694.039 | 12809.8  | 3854.217 | 4343.1   | 6110.802 | 9789.59  | 8114.598 | 5012.312 | 5154.736 | 7615.654 | 5124.236 | 9704.668 | 14800.3  | 6578.615 | 17011.93 | 11157.91 |
| 4386.333 | 13892.46 | 10687.85 | 6591.999 | 5093.125 | 11777.93 | 7709.178 | 8462.353 | 6598.63  | 13285.15 | 9972.75  | 6297.198 | 15167.61 | 6275.047 | 7596.386 | 1332.674 |
| 11669.1  | 12660.7  | 22660.86 | 17807.71 | 26880.67 | 23296.72 | 23738.63 | 13598.43 | 15306.44 | 20513.7  | 16067.5  | 7345.946 | 7099.134 | 19925.83 | 21652.05 | 15120.54 |
| 3161.235 | 9526.304 | 3551.585 | 4152.346 | 3820.54  | 9103.872 | 5093.301 | 5442.026 | 3617.945 | 5267.543 | 5065.325 | 1579.295 | 1601.862 | 2969.219 | 11801.69 | 5814.158 |
| 15654.35 | 14537.27 | 11879.53 | 9231.687 | 14999.28 | 11372.08 | 4655.634 | 5771.949 | 7368.298 | 15541.43 | 7477.414 | 11145.2  | 19233.3  | 5246.294 | 20098.04 | 15146.03 |
| 7903.161 | 8010.127 | 11865.59 | 6439.284 | 8394.882 | 11273.36 | 7010.758 | 4858.98  | 4514.616 | 11493.66 | 5918.371 | 11451.99 | 10641    | 1283.749 | 6346.173 | 2144.184 |
| 7903.161 | 8010.127 | 11865.59 | 6439.284 | 8406.662 | 11273.36 | 9270.034 | 4858.98  | 4514.616 | 11493.66 | 5918.371 | 11451.99 | 10641    | 3442.254 | 6398.258 | 4830.901 |
| 8723.373 | 26853.73 | 12495.78 | 9424.712 | 14329.11 | 18734.04 | 13138.02 | 12793.21 | 7121.897 | 9372.978 | 1777.053 | 5339.275 | 3317.911 | 9103.963 | 27510.45 | 27077.63 |
| 9191.969 | 26169.85 | 12608.1  | 9477.595 | 14304.78 | 18748.73 | 13327.79 | 12712.35 | 7244.736 | 9415.407 | 1782.089 | 5359.514 | 3363.383 | 9394.917 | 27201.34 | 25672.89 |

|          |          |          |          |          |          |          |          |          |          |          |          |          |          |          |          |
|----------|----------|----------|----------|----------|----------|----------|----------|----------|----------|----------|----------|----------|----------|----------|----------|
| 3821.746 | 7604.272 | 5345.227 | 4112.017 | 10159.54 | 7423.489 | 8979.597 | 3546.639 | 3465.469 | 4182.995 | 2440.802 | 5351.745 | 7947.061 | 3644.756 | 11152.77 | 8079.724 |
| 8870.563 | 26037.89 | 12563.12 | 9420.34  | 14269.34 | 18800.18 | 13366.11 | 12785.5  | 7209.933 | 9312.066 | 1782.167 | 5323.563 | 3331.486 | 9298.03  | 26900.81 | 25897.81 |
| 1182.171 | 12874.16 | 3207.427 | 2328.48  | 7419.385 | 7666.458 | 6192.598 | 6070.114 | 3897.803 | 4753.064 | 592.7362 | 3374.346 | 3238.465 | 5216.523 | 14175.54 | 13029.43 |
| 6577.37  | 10620.63 | 3775.945 | 4238.16  | 6378.991 | 8514.781 | 6033.809 | 5057.688 | 6738.736 | 7841.133 | 4862.699 | 8945.06  | 9303.877 | 7175.53  | 15903.11 | 9450.068 |
| 11354.94 | 10068.61 | 11802.64 | 7347.267 | 6628.81  | 8083.48  | 5597.284 | 5089.918 | 8556.1   | 9064.949 | 5540.544 | 6367.749 | 6721.354 | 5366.067 | 14248.4  | 12027.64 |
| 116.8174 | 12243.05 | 15108.96 | 8178.06  | 1919.417 | 8811.719 | 3208.944 | 11113.59 | 3474.563 | 2962.599 | 6394.82  | 630.2118 | 948.7484 | 0        | 797.4068 | 38.35255 |
| 5376.131 | 8030.083 | 6502.277 | 4444.359 | 4775.45  | 5270.695 | 2884.104 | 3233.909 | 4042.868 | 13247.05 | 5281.949 | 8251.956 | 19399.8  | 1990.322 | 6849.315 | 3637.935 |
| 5327.747 | 9743.464 | 9837.56  | 6473.2   | 3727.858 | 10373    | 6195.157 | 7715.603 | 5340.486 | 11042.28 | 8483.186 | 4595.725 | 8893.525 | 3582.842 | 4137.16  | 1014.788 |
| 4693.645 | 11011    | 5628.095 | 3792.898 | 7407.375 | 7099.755 | 4918.953 | 7673.875 | 4309.443 | 6256.87  | 1500.727 | 3615.555 | 1548.025 | 6223.227 | 15855.16 | 12589.26 |
| 3523.616 | 11164.45 | 11145.17 | 9424.193 | 15638.55 | 15898.01 | 15858.19 | 7218.069 | 6637.605 | 15428.81 | 8665.424 | 9790.81  | 11403.99 | 4409.191 | 11502.02 | 6937.237 |
| 4693.584 | 10398.63 | 8279.354 | 14187.61 | 9558.872 | 10636.1  | 6496.736 | 5047.76  | 6513.459 | 11979.86 | 9208.728 | 8227.668 | 17222.24 | 5023.807 | 16298.86 | 7335.724 |
| 8890.566 | 13084.18 | 8094.378 | 6525.376 | 8791.871 | 13045.08 | 10855.92 | 9027.629 | 11974.65 | 15270.11 | 10283.74 | 4650.068 | 4877.984 | 6188.778 | 17044.52 | 13041.52 |
| 12270.07 | 23247.39 | 5021.38  | 2062.458 | 4996.847 | 5493.007 | 3767.94  | 6322.154 | 9142.715 | 18905.46 | 6294.017 | 9679.055 | 12398.64 | 9993.263 | 34523.82 | 28922.43 |
| 4511.408 | 12565.22 | 6886.979 | 3692.55  | 8159.096 | 4232.119 | 3495.884 | 4688.109 | 6865.111 | 14913.35 | 10049.55 | 5758.867 | 12568.42 | 6689.978 | 10314.25 | 8807.204 |
| 9231.007 | 26752.78 | 3374.711 | 5575.588 | 0        | 17627.57 | 11179.91 | 11302.48 | 8910.383 | 11119.07 | 2391.575 | 3179.775 | 4159.279 | 11259.18 | 27634.19 | 27260.34 |
| 3918.036 | 5195.08  | 0        | 205.6455 | 25.40306 | 6684.739 | 2108.176 | 2881.268 | 4661.175 | 5065.845 | 512.5632 | 495.5899 | 271.9712 | 5075.881 | 13105.22 | 9566.487 |
| 654.1818 | 2639.649 | 0        | 0        | 28.21729 | 6948.21  | 2294.458 | 2975.578 | 674.9477 | 363.9204 | 66.26682 | 456.9177 | 256.5531 | 4546.826 | 4465.57  | 2948.882 |
| 9322.588 | 11588.96 | 6961.118 | 5960.449 | 8918.45  | 12465.63 | 11230.29 | 7856.045 | 11353.37 | 15810.43 | 9712.598 | 4822.743 | 7169.641 | 6055.739 | 15543.94 | 13735.24 |
| 3556.436 | 4574.584 | 0        | 204.1274 | 25.38957 | 6324.93  | 2050.72  | 2774.478 | 4211.683 | 4987.948 | 508.9272 | 491.8406 | 271.8437 | 3559.693 | 5206.945 | 2669.772 |
| 3745.445 | 2267.203 | 3241.044 | 4526.7   | 5249.611 | 5547.213 | 2282.909 | 2310.255 | 2671.316 | 7415.927 | 3724.368 | 5016.159 | 8982.14  | 4230.587 | 7047.182 | 2275.729 |
| 4010.242 | 9956.965 | 5123.456 | 2726.903 | 6634.808 | 3130.729 | 2563.672 | 3418.037 | 5362.73  | 13134.37 | 8376.048 | 4616.742 | 16002.17 | 6973.216 | 8399.46  | 7308.03  |
| 7910.242 | 13339.96 | 6514.04  | 4404.096 | 8750.627 | 8183.036 | 5700.375 | 9967.388 | 7193.302 | 9527.183 | 3863.729 | 7719.785 | 16537.31 | 5077.546 | 19530.66 | 16527.55 |
| 6532.988 | 11617.5  | 7833.663 | 7105.202 | 4890.751 | 10143.31 | 6663.583 | 4224.023 | 5808.091 | 10455.43 | 4780.972 | 4192.706 | 10404.89 | 6365.783 | 17120.36 | 21750.14 |
| 9445.831 | 19534.89 | 3540.44  | 1796.708 | 3539.493 | 6163.681 | 3228.663 | 6291.339 | 9439.002 | 15295.57 | 6478.703 | 3249.397 | 13197.41 | 11850.11 | 22974.64 | 19658.26 |
| 4552.591 | 11691.83 | 8617.671 | 4623.071 | 14250.96 | 10087.45 | 13418.4  | 5371.528 | 15414.31 | 18893.92 | 10596.41 | 12648.15 | 3611.032 | 5393.505 | 19200.72 | 12954.91 |
| 5114.974 | 7204.095 | 1312.898 | 465.303  | 2938.507 | 5914.734 | 1510.441 | 2096.275 | 2900.284 | 4183.522 | 372.8969 | 1317.57  | 1892.487 | 4028.587 | 13703.3  | 10116.85 |
| 306.5181 | 2528.874 | 6660.306 | 6015.452 | 11468.49 | 12851.83 | 13974.52 | 1128.505 | 2101.646 | 6286.025 | 4573.205 | 4316.967 | 4948.097 | 909.7639 | 173.285  | 553.4749 |
| 4573.267 | 6509.971 | 3570.461 | 2148.916 | 4659.594 | 4200.496 | 2803.013 | 4639.622 | 2569.018 | 3966.149 | 798.1272 | 1961.204 | 741.3051 | 3837.76  | 11086.27 | 8502.906 |
| 1271.204 | 6039.005 | 3875.258 | 2571.864 | 7830.355 | 5783.732 | 7721.252 | 4993.475 | 2218.433 | 2186.166 | 1932.161 | 2288.299 | 1491.339 | 2307.739 | 5435.354 | 3839.689 |
| 3548.489 | 6778.726 | 13068.98 | 13060.79 | 6120.268 | 17166.06 | 10151.16 | 7845.34  | 4025.096 | 8613.274 | 6737.401 | 1570.872 | 4165.351 | 5516.374 | 12831.12 | 9397.022 |
| 7436.68  | 12208.64 | 2580.199 | 1077.782 | 4514.452 | 6555.004 | 3410.038 | 3127.246 | 4145.874 | 6399.775 | 1474.102 | 4705.421 | 6266.847 | 6341.737 | 20789.88 | 17875.15 |
| 3042.204 | 9366.488 | 2800.972 | 1359.154 | 2694.346 | 4313.696 | 2340.322 | 4778.446 | 4066.018 | 5576.709 | 3237.271 | 2886.497 | 7391.987 | 7008.636 | 6760.418 | 3847.153 |
| 318.4669 | 4172.069 | 4720.26  | 1996.543 | 5704.227 | 1499.487 | 1002.106 | 869.56   | 142.4056 | 58.12326 | 566.2127 | 337.0844 | 1165.691 | 81.61755 | 1039.146 | 176.4052 |
| 1115.753 | 3746.939 | 0        | 375.5898 | 50.58233 | 5309.541 | 1726.672 | 3595.817 | 1738.88  | 4198.117 | 936.6356 | 888.4722 | 511.4316 | 6179.763 | 6893.052 | 4723.075 |
| 6795.978 | 10873.55 | 3014.029 | 770.0305 | 5499.23  | 9423.788 | 6698.786 | 5566.058 | 4923.552 | 7618.272 | 3379.46  | 6879.803 | 9250.587 | 4053.018 | 18588.5  | 12730.36 |

|          |          |          |          |          |          |          |          |          |          |          |          |          |          |          |          |
|----------|----------|----------|----------|----------|----------|----------|----------|----------|----------|----------|----------|----------|----------|----------|----------|
| 4434.355 | 6817.761 | 2526.228 | 1160.166 | 3462.225 | 4992.527 | 2434.715 | 2425.555 | 2913.389 | 5382.338 | 2095.849 | 3020.718 | 5464.727 | 2785.085 | 14622.33 | 9769.323 |
| 3327.086 | 9900.851 | 1822.819 | 958.6202 | 3547.453 | 4029.102 | 2855.636 | 2911.338 | 5602.675 | 10486.02 | 4947.467 | 1388.293 | 8509.324 | 6497.506 | 9593.774 | 7258.803 |
| 4534.871 | 7610.538 | 4518.48  | 3775.165 | 3781.535 | 7882.577 | 3298.874 | 3135.038 | 4363.602 | 9726.585 | 7412.234 | 3540.609 | 10275.73 | 1668.184 | 7613.255 | 3168.726 |
| 510.7456 | 5169.635 | 5713.924 | 3221.49  | 3915.028 | 1843.244 | 660.502  | 777.5948 | 2357.728 | 9535.049 | 3243.542 | 170.2762 | 7184.911 | 30.12816 | 2747.476 | 259.5749 |
| 5490.627 | 9432.509 | 4378.874 | 1795.833 | 7347.352 | 5073.914 | 3589.306 | 3052.708 | 5377.437 | 13560.44 | 8915.329 | 5241.024 | 15507.85 | 7978.504 | 9381.943 | 8610.245 |
| 6753.743 | 12582.97 | 2860.721 | 5023.053 | 3470.939 | 6326.828 | 2026.198 | 3939.118 | 6087.51  | 8291.688 | 5107.957 | 938.7376 | 3342.963 | 6867.149 | 19200.03 | 15953.56 |
| 20.23358 | 1133.714 | 3237.604 | 2403.09  | 3000.133 | 2138.597 | 2778.541 | 2841.738 | 1777.568 | 4848.552 | 1688.84  | 1708.656 | 2342.774 | 0        | 0        | 41.52602 |
| 7007.903 | 9871.262 | 3171.813 | 3142.962 | 4663.834 | 5337.031 | 1824.831 | 4508.764 | 5170.111 | 5878.838 | 3687.536 | 1871.786 | 2057.684 | 6333.903 | 20689.61 | 16927.72 |
| 2893.023 | 5452.083 | 3656.577 | 2062.743 | 3088.551 | 2366.337 | 1145.924 | 1323.551 | 2217.553 | 4583.105 | 2621.321 | 540.1301 | 6966.82  | 94.84096 | 4326.556 | 101.5608 |
| 1816.746 | 1253.538 | 1328.361 | 234.7104 | 436.1442 | 2483.645 | 823.2308 | 2626.405 | 1781.3   | 2019.069 | 197.9633 | 122.616  | 354.5696 | 2521.332 | 5615.421 | 3217.812 |
| 5772.637 | 8144.412 | 3769.129 | 1507.021 | 6642.919 | 5276.716 | 2259.889 | 2972.348 | 4818.565 | 13318.77 | 8534.22  | 4608.107 | 15797.75 | 4998.313 | 8625.779 | 7517.454 |
| 9304.497 | 12860.57 | 1968.15  | 981.3477 | 5001.349 | 9684.2   | 5613.855 | 7330.702 | 7634.173 | 10891.1  | 4132.2   | 5917.853 | 6844.848 | 6833.542 | 20885.12 | 16420.9  |
| 8772.77  | 16160.28 | 3273.321 | 1056.156 | 2154.243 | 8935.317 | 4766.99  | 4642.414 | 7080.172 | 11903.86 | 4514.054 | 15597.16 | 12260.39 | 5417.2   | 17094.65 | 15666.75 |
| 4644.123 | 5887.662 | 2144.814 | 679.6945 | 4794.455 | 4043.349 | 4356.042 | 5115.266 | 4272.478 | 7033.593 | 3183.516 | 3765.145 | 5840.121 | 2446.689 | 7898.856 | 725.6    |
| 11639.59 | 21002.9  | 1918.151 | 994.7081 | 1917.278 | 3791.616 | 1816.427 | 3842.826 | 8111.833 | 17022.45 | 5439.778 | 1632.335 | 10982.19 | 8767.934 | 33647.48 | 27284.41 |
| 5581.765 | 10940.03 | 1901.703 | 934.179  | 1900.953 | 3307.686 | 1721.203 | 3512.701 | 5402.664 | 8132.798 | 3322.681 | 2709.051 | 7407.181 | 6997.678 | 14345.87 | 11300.18 |
| 202.5829 | 1030.294 | 5663.289 | 4341.369 | 12569.57 | 11098.33 | 16434.58 | 535.3524 | 1072.259 | 2932.049 | 2784.105 | 2695.833 | 2959.262 | 427.1768 | 107.9476 | 333.9699 |
| 1973.318 | 10752.58 | 2038.777 | 1320.82  | 1772.634 | 4178.369 | 1592.93  | 4935.95  | 2909.972 | 3602.482 | 3602.686 | 2218.09  | 5163.941 | 7373.027 | 8104.986 | 6080.42  |
| 5978.956 | 18744.75 | 5372.15  | 4436.632 | 1621.137 | 11055.83 | 2615.919 | 6184.82  | 6426.415 | 10938.68 | 635.6    | 8225.711 | 2941.673 | 15811.93 | 18578.68 | 16343.93 |
| 15.18055 | 874.8028 | 2548.479 | 1960.355 | 2381.881 | 1656.405 | 2194.839 | 2283.154 | 1385.198 | 3808.322 | 1305.765 | 1321.365 | 1850.471 | 0        | 0        | 31.16876 |
| 5268.049 | 7515.694 | 4038.244 | 10241.22 | 3942.627 | 8612.886 | 4405.82  | 4026.06  | 5065.067 | 6237.04  | 1270.235 | 2065.678 | 1899.722 | 5355.897 | 8716.766 | 7423.486 |
| 4849.132 | 4567.599 | 129.9425 | 252.261  | 77.42218 | 5103.121 | 1463.825 | 1838.606 | 2939.469 | 3879.957 | 429.541  | 458.5979 | 438.057  | 4604.414 | 15590.41 | 14094.37 |
| 4235.691 | 4547.173 | 229.8133 | 251.4531 | 1883.471 | 4849.331 | 1424.581 | 1833.578 | 2861.84  | 3722.94  | 1094.866 | 1340.108 | 1779.779 | 4773.96  | 13853.41 | 13240.95 |
| 15.55149 | 3901.037 | 50.87612 | 21.8958  | 49.28705 | 888.704  | 1532.821 | 1593.902 | 1329.565 | 2544.328 | 1916.658 | 2750.749 | 3947.585 | 946.6417 | 737.0136 | 244.471  |
| 6312.058 | 12606.16 | 998.2524 | 1117.572 | 864.6382 | 7768.337 | 3291.999 | 5186.656 | 5594.212 | 9091.844 | 2715.734 | 2204.125 | 4275.314 | 4315.986 | 17988.48 | 12150.38 |
| 3221.078 | 4718.886 | 3577.477 | 9819.697 | 2462.338 | 6958.708 | 4147.554 | 736.27   | 3366.891 | 6638.594 | 5003.492 | 1476.18  | 1979.569 | 3386.629 | 5744.133 | 4701.361 |
| 359.087  | 1711.11  | 3714.151 | 2170.875 | 2816.334 | 3860.73  | 2656.412 | 782.6018 | 685.7636 | 1070.352 | 1145.696 | 967.7375 | 1328.584 | 15.0243  | 2324.962 | 514.1366 |
| 667.9672 | 1567.256 | 334.9054 | 307.7794 | 838.578  | 5360.144 | 2984.653 | 2065.207 | 2109.508 | 5076.313 | 3168.759 | 1410.851 | 1836.953 | 1894.426 | 2301.235 | 1697.978 |
| 6484.643 | 9496.271 | 1642.339 | 395.9391 | 2125.487 | 5193.261 | 2093.768 | 2955.285 | 5896.03  | 7112.143 | 1811.973 | 1102.598 | 2395.759 | 5242.819 | 23652.44 | 17245.32 |
| 671.8988 | 987.3403 | 326.2409 | 43.92319 | 1658.511 | 1498.611 | 685.6308 | 2376.586 | 654.6031 | 657.2776 | 320.4961 | 0        | 136.9326 | 530.96   | 2202.719 | 1584.014 |
| 2977.166 | 2418.68  | 2290.317 | 1638.315 | 3870.909 | 3660.817 | 2922.934 | 820.4367 | 1814.599 | 2576.928 | 1956.468 | 4607.225 | 7042.953 | 1662.498 | 6148.506 | 5534.02  |
| 2297.173 | 1845.125 | 1169.498 | 352.33   | 566.5975 | 2949.904 | 938.8506 | 1041.128 | 1951.714 | 2312.813 | 221.6093 | 191.6517 | 492.0793 | 1039.53  | 7612.725 | 4791.645 |
| 4407.537 | 11092.57 | 1049.901 | 1158.977 | 1944.597 | 8239.856 | 5267.013 | 7357.756 | 4788.696 | 6816.38  | 1267.098 | 962.9205 | 1060.564 | 5875.358 | 16068.37 | 15053.49 |
| 5949.98  | 11391.85 | 1756.771 | 3443.566 | 2697.633 | 5710.925 | 1873.618 | 2754.721 | 3652.368 | 5268.239 | 526.3115 | 1083.302 | 2482.207 | 5019.322 | 22254.06 | 18085.26 |
| 3720.475 | 2953.454 | 216.7198 | 451.1715 | 949.2841 | 2330.561 | 841.5985 | 2639.302 | 1832.098 | 3016.911 | 472.5484 | 601.2029 | 1084.86  | 1764.558 | 8535.009 | 5743.493 |



|          |          |          |          |          |          |          |          |          |          |          |          |          |          |          |          |
|----------|----------|----------|----------|----------|----------|----------|----------|----------|----------|----------|----------|----------|----------|----------|----------|
| 4375.836 | 5157.853 | 1024.316 | 1003.448 | 1935.719 | 6873.465 | 4500.76  | 4484.037 | 4382.419 | 6024.699 | 1259.214 | 956.7538 | 1054.064 | 5834.094 | 12973.28 | 11529.2  |
| 4187.575 | 10160.51 | 924.2918 | 1023.828 | 1721.218 | 7567.82  | 4811.196 | 6733.86  | 4438.16  | 6350.659 | 1122.693 | 848.0757 | 940.6063 | 5456.753 | 15177.58 | 14014.43 |
| 4187.575 | 10160.51 | 924.2918 | 1023.828 | 1721.218 | 7567.82  | 4811.196 | 6733.86  | 4438.16  | 6350.659 | 1122.693 | 848.0757 | 940.6063 | 5456.753 | 15177.58 | 14014.43 |
| 4187.575 | 10160.51 | 924.2918 | 1023.828 | 1721.218 | 7567.82  | 4811.196 | 6733.86  | 4438.16  | 6350.659 | 1122.693 | 848.0757 | 940.6063 | 5456.753 | 15177.58 | 14014.43 |
| 734.9453 | 411.3319 | 2874.742 | 63.30926 | 1220.859 | 3805.875 | 2956.11  | 1777.756 | 3526.648 | 6156.322 | 4442.388 | 85.096   | 32.62643 | 133.2218 | 3738.068 | 3096.583 |
| 1540.847 | 803.4947 | 352.4767 | 155.2372 | 2191.32  | 6154.739 | 5227.478 | 2420.178 | 358.8177 | 387.3136 | 781.7573 | 1896.406 | 2142.739 | 193.6112 | 48.21899 | 15.85173 |
| 5134.86  | 8730.448 | 1499.805 | 3027.971 | 2292.364 | 4862.565 | 1601.976 | 2321.458 | 3155.036 | 4592.312 | 442.4591 | 899.3229 | 2160.41  | 4464.348 | 13969.9  | 9458.948 |
| 2998.102 | 2544.765 | 1885.324 | 2683.782 | 1876.832 | 3162.624 | 1942.769 | 238.3737 | 1713.249 | 3056.925 | 729.1591 | 1070.747 | 1386.692 | 143.8165 | 2186.088 | 197.9074 |
| 3837.401 | 5157.853 | 854.2001 | 883.7423 | 1683.65  | 5515.121 | 4401.176 | 4484.037 | 3228.206 | 4105.862 | 1090.602 | 902.2697 | 1007.527 | 3599.876 | 12973.28 | 11529.2  |
| 8283.457 | 12810.18 | 1232.298 | 381.8838 | 2437.971 | 6504.511 | 3135.863 | 4703.586 | 5037.116 | 7473.355 | 2406.331 | 7640.531 | 6703.967 | 5483.552 | 14189.91 | 9850.957 |
| 492.0994 | 1930.898 | 1281.428 | 489.2649 | 69.87084 | 120.3771 | 328.4335 | 0        | 485.0267 | 203.2635 | 581.0819 | 155.4245 | 512.7006 | 85.52417 | 1488.858 | 53.11452 |
| 57.15475 | 2096.503 | 661.36   | 155.3491 | 1861.409 | 792.8182 | 959.2397 | 276.6129 | 674.4423 | 1181.674 | 1236.869 | 1242.403 | 2202.272 | 0        | 0        | 267.4778 |
| 0        | 1502.914 | 1592.318 | 1076.033 | 633.7117 | 998.2301 | 93.06098 | 437.9333 | 291.8246 | 122.6976 | 365.6854 | 386.0448 | 710.6124 | 619.9006 | 0        | 0        |
| 3528.403 | 8671.706 | 709.0695 | 785.1923 | 1322.964 | 6113.473 | 3756.642 | 5610.893 | 3479.718 | 4980.634 | 861.4113 | 649.8265 | 720.5682 | 4184.25  | 13958.87 | 12545.58 |
| 9648.175 | 12008.68 | 652.9645 | 690.2582 | 420.0387 | 11811.96 | 5544.366 | 6947.233 | 7166.582 | 9621.851 | 850.5748 | 4055.86  | 4813.867 | 5969.32  | 17536.58 | 15007.85 |
| 3571.409 | 4812.021 | 1573.63  | 5389.467 | 1304.593 | 8408.338 | 5073.44  | 2990.612 | 3353.677 | 8343.6   | 3181.521 | 4791.928 | 6650.914 | 3346.749 | 8752.885 | 6442.49  |
| 4172.053 | 5935.327 | 664.3719 | 315.0391 | 2029.48  | 5058.149 | 2452.78  | 3392.014 | 3627.928 | 5391.866 | 1731.465 | 4799.306 | 4831.94  | 3850.611 | 10520.31 | 7832.424 |
| 3497.974 | 3691.255 | 691.5706 | 678.3457 | 1316.8   | 5005.965 | 3177.824 | 3237.522 | 3160.37  | 4353.607 | 855.9464 | 645.6142 | 716.0675 | 4152.872 | 10648.47 | 9076.955 |
| 4630.299 | 9265.025 | 509.869  | 576.342  | 442.6376 | 4698.806 | 1799.647 | 3315.362 | 3737.145 | 5653.905 | 1509.767 | 1187.577 | 2305.239 | 3407.627 | 16021.53 | 11892.23 |
| 0        | 8771.276 | 5646.452 | 2911.211 | 3185.363 | 579.4883 | 245.2049 | 2796.635 | 206.6067 | 653.0493 | 581.9504 | 146.4434 | 129.8266 | 22.23993 | 0        | 0        |
| 0        | 1507.612 | 2070.976 | 3273.699 | 4546.782 | 0        | 0        | 302.2166 | 0        | 0        | 0        | 0        | 2418.07  | 0        | 8460.832 | 2477.113 |
| 8268.188 | 12229.29 | 537.1023 | 566.096  | 342.4713 | 10721.2  | 4511.681 | 6442.875 | 6090.082 | 8052.843 | 702.3997 | 2222.029 | 3584.093 | 6891.185 | 20839.91 | 16345.42 |
| 3565.875 | 2739.856 | 215.2258 | 450.2809 | 822.5431 | 2148.662 | 824.4408 | 2195.852 | 2032.345 | 2953.366 | 468.2294 | 408.0753 | 345.1109 | 1796.152 | 7031.701 | 4730.678 |
| 4665.61  | 6161.123 | 112.9035 | 279.7835 | 0        | 1274.325 | 734.1102 | 68.42696 | 3366.576 | 4281.509 | 412.5709 | 839.0687 | 1114.195 | 4096.156 | 14773.29 | 10725.94 |
| 6795.978 | 8854.003 | 539.3832 | 255.3364 | 1650.96  | 4445.752 | 2040.877 | 3351.053 | 3337.527 | 4781.24  | 1499.707 | 4300.808 | 4516.037 | 3812.914 | 12830.56 | 8416.437 |
| 6502.889 | 8495.03  | 773.0006 | 436.8616 | 992.7632 | 4917.443 | 3376.434 | 3001.319 | 3800.668 | 5885.452 | 1790.337 | 3472.382 | 6124.045 | 4195.436 | 12039.57 | 8171.704 |
| 495.4738 | 2374.455 | 366.3731 | 287.0726 | 875.7469 | 3966.426 | 2274.222 | 595.2294 | 448.4326 | 1598.794 | 671.8115 | 3490.058 | 4070.351 | 524.1622 | 512.2331 | 129.8701 |
| 28.43588 | 533.0923 | 2291.731 | 949.1578 | 3698.179 | 2352.644 | 3597.842 | 1695.656 | 5153.179 | 3521.742 | 3738.549 | 384.9363 | 430.1778 | 0        | 4452.126 | 129.2184 |
| 4046.642 | 6355.991 | 988.0723 | 2460.068 | 1362.026 | 3326.161 | 1115.897 | 1391.003 | 2278.449 | 3202.021 | 284.9213 | 558.946  | 958.4751 | 3644.374 | 16815.69 | 12749.52 |
| 3466.053 | 4002.071 | 296.6853 | 405.0614 | 130.6353 | 2951.631 | 1158.312 | 2192.229 | 2269.521 | 3273.571 | 690.3901 | 567.442  | 408.9364 | 2385.707 | 8822.834 | 6199.326 |
| 1358.882 | 2301.241 | 881.3068 | 930.8337 | 207.3529 | 2237.271 | 711.601  | 45.0037  | 1183.509 | 915.9067 | 174.9721 | 468.8449 | 1536.598 | 260.2414 | 2231.75  | 0        |
| 3037.512 | 1155.341 | 137.7605 | 174.214  | 356.1139 | 1486.754 | 616.4321 | 412.384  | 1602.909 | 2158.73  | 2570.926 | 1439.318 | 3928.43  | 13.06106 | 49.52626 | 122.4024 |
| 3358.135 | 1177.942 | 137.5569 | 174.7081 | 354.8017 | 1530.839 | 618.6338 | 414.2584 | 1672.012 | 2273.445 | 2930.188 | 1191.586 | 4200.035 | 13.06355 | 49.56204 | 122.6912 |
| 5269.569 | 8866.661 | 1022.821 | 870.0227 | 1528.594 | 6669.925 | 3365.02  | 3512.286 | 3247.293 | 4563.862 | 2094.261 | 2553.569 | 3346.807 | 7141.856 | 18988.32 | 14268.94 |
| 53.03439 | 829.1025 | 4056.902 | 3204.492 | 3679.876 | 6278.118 | 5468.155 | 3176.435 | 4402.79  | 7192.62  | 2972.619 | 1983.635 | 3056.333 | 252.1097 | 1568.144 | 4598.336 |

|          |          |          |          |          |          |          |          |          |          |          |          |          |          |          |          |
|----------|----------|----------|----------|----------|----------|----------|----------|----------|----------|----------|----------|----------|----------|----------|----------|
| 5763.167 | 12487.12 | 0        | 743.1421 | 0        | 5378.102 | 2337.215 | 2811.672 | 4508.702 | 5079.608 | 900.9667 | 450.986  | 1332.794 | 5926.918 | 18187.49 | 15359.63 |
| 0        | 875.3258 | 1534.747 | 3384.641 | 2380.811 | 235.5544 | 143.3323 | 405.954  | 71.9642  | 143.7077 | 95.27558 | 103.7505 | 1275.266 | 0        | 4197.343 | 879.2996 |
| 2675.549 | 3707.209 | 571.2148 | 252.4179 | 281.8115 | 2180.378 | 895.3252 | 2177.008 | 1570.116 | 1750.977 | 61.94288 | 221.6745 | 400.3032 | 1862.904 | 10336.29 | 8366.553 |
| 4098.486 | 5894.06  | 124.9909 | 411.5057 | 1184.816 | 5014.86  | 1551.481 | 3462.507 | 3068.516 | 3737.438 | 321.6221 | 412.9262 | 1479.148 | 4276.56  | 14734.79 | 11814.07 |
| 1822.662 | 5613.42  | 2190.104 | 1397.604 | 1015.377 | 2274.488 | 558.4292 | 1741.206 | 2112.131 | 2826.484 | 462.2512 | 1705.741 | 2221.724 | 3854.375 | 13792.72 | 10482.13 |
| 3922.43  | 5692.388 | 118.1156 | 389.6041 | 1124.159 | 4852.305 | 1492.406 | 3383.444 | 2967.265 | 3572.416 | 304.4726 | 390.7592 | 1401.351 | 4243.114 | 14567.16 | 11807.74 |
| 3221.078 | 4718.886 | 0        | 646.3399 | 0        | 5726.387 | 2972.088 | 158.5855 | 3366.891 | 3882.295 | 694.1368 | 958.3397 | 629.5733 | 3386.629 | 5744.133 | 4701.361 |
| 3837.401 | 5157.853 | 0        | 834.9854 | 188.1221 | 5515.121 | 2480.489 | 4484.037 | 3228.206 | 4105.862 | 891.5031 | 418.97   | 0        | 3599.876 | 12973.28 | 11529.2  |
| 3837.401 | 5157.853 | 0        | 834.9854 | 188.1221 | 5515.121 | 2480.489 | 4484.037 | 3228.206 | 4105.862 | 891.5031 | 418.97   | 0        | 3599.876 | 12973.28 | 11529.2  |
| 454.4592 | 0        | 29.39185 | 321.1482 | 0        | 1311.651 | 31.81178 | 790.6309 | 111.7401 | 167.2935 | 257.3635 | 551.3112 | 44.48907 | 28.14757 | 0        | 0        |
| 4720.486 | 6652.709 | 1215.986 | 703.4045 | 2412.621 | 3548.673 | 2649.94  | 2972.256 | 4715.337 | 5492.556 | 1625.376 | 2093.162 | 3792.005 | 4478.177 | 15449.63 | 11122.39 |
| 4720.486 | 6652.709 | 1215.986 | 703.4045 | 2412.621 | 3548.673 | 2649.94  | 2972.256 | 4715.337 | 5492.556 | 1625.376 | 2093.162 | 3792.005 | 4478.177 | 15449.63 | 11122.39 |
| 562.7663 | 1057.744 | 1329.636 | 1114.343 | 1822.961 | 2312.398 | 3835.977 | 553.1492 | 1934.581 | 2460.531 | 1309.814 | 2758.51  | 1959.745 | 1729.845 | 795.0803 | 157.762  |
| 0        | 2723.918 | 0        | 29.80836 | 0        | 1632.91  | 465.0971 | 0        | 907.8216 | 1191.389 | 170.9438 | 0        | 0        | 0        | 5257.729 | 3936.362 |
| 1321.792 | 1568.247 | 3435.472 | 491.172  | 2591.898 | 2261.479 | 911.1173 | 2097.371 | 1921.294 | 1222.572 | 4035.54  | 807.1787 | 1255.22  | 737.2741 | 5412.122 | 4396.798 |
| 2066.409 | 4436.84  | 314.8391 | 350.6068 | 594.4076 | 3078.909 | 1826.303 | 2816.738 | 1786.305 | 2579.892 | 388.1423 | 289.6938 | 327.2922 | 2070.803 | 8728.46  | 7123.578 |
| 527.1856 | 1110.739 | 499.2971 | 426.3208 | 444.5943 | 2086.075 | 693.674  | 1652.336 | 557.4663 | 1332.257 | 736.4909 | 107.1541 | 206.2483 | 513.5146 | 2806.51  | 1708.581 |
| 3559.29  | 5283.969 | 0        | 228.027  | 0        | 3787.346 | 1217.145 | 2901.069 | 4582.038 | 5384.724 | 564.5713 | 545.7503 | 301.4114 | 4183.153 | 11983.63 | 8318.055 |
| 1502.994 | 123.7479 | 1485.184 | 54.68394 | 824.8101 | 1770.697 | 2327.216 | 946.8524 | 5569.056 | 4344.182 | 4613.757 | 171.9423 | 164.7701 | 0        | 2983.622 | 120.6544 |
| 3274.323 | 6542.583 | 338.1941 | 498.8967 | 1311.598 | 1050.864 | 252.2128 | 1375.344 | 1991.813 | 3266.887 | 1564.408 | 226.1078 | 1453.937 | 978.3679 | 4928.17  | 4159.408 |
| 4030.179 | 8068.054 | 140.2674 | 378.8158 | 0        | 3047.669 | 1255.464 | 1533.686 | 2915.182 | 3124.286 | 525.0852 | 230.584  | 765.8786 | 4049.268 | 13775.11 | 11488.4  |
| 4115.076 | 6359.403 | 0        | 147.809  | 0        | 3458.022 | 1226.48  | 2371.258 | 2507.628 | 3342.012 | 206.0958 | 355.3539 | 423.5989 | 3391.344 | 16346.04 | 12475.18 |
| 5218.844 | 6069.95  | 0        | 210.1878 | 40.64255 | 4535.848 | 1946.515 | 3387.648 | 3078.492 | 3873.161 | 179.5469 | 662.0187 | 1126.227 | 2941.272 | 10874.71 | 9388.886 |
| 7462.434 | 9744.985 | 241.94   | 256.4001 | 154.2308 | 6488.189 | 2345.941 | 3736.265 | 3883.889 | 4841.571 | 321.1895 | 1725.763 | 2104.51  | 6996.288 | 22240.68 | 19348.06 |
| 3438.115 | 5276.89  | 0        | 191.7096 | 0        | 4060.533 | 1499.334 | 232.9002 | 2748.129 | 3430.729 | 200.4138 | 608.8046 | 366.5733 | 3528.295 | 7339.162 | 5925.337 |
| 2994.212 | 3691.255 | 0        | 563.1368 | 125.6589 | 3944.607 | 1706.126 | 3237.522 | 2278.962 | 2889.749 | 602.5442 | 280.7948 | 0        | 2497.696 | 10648.47 | 9076.955 |
| 3445.02  | 4555.937 | 379.1991 | 199.5835 | 886.5229 | 2470.5   | 1495.278 | 2161.824 | 3123.005 | 3617.116 | 860.5492 | 1076.276 | 3231.834 | 2292.212 | 10289.36 | 7593.925 |
| 5563.167 | 6360.319 | 0        | 198.7738 | 0        | 4550.898 | 1504.519 | 2503.544 | 4202.704 | 4471.804 | 282.7231 | 287.9259 | 349.1653 | 5432.397 | 18899.3  | 14157.45 |
| 3684.463 | 4472.203 | 60.35585 | 524.4346 | 0        | 2209.494 | 759.779  | 1573.513 | 2263.452 | 3262.478 | 131.4639 | 523.5142 | 429.6881 | 2454.798 | 8617.945 | 6055.087 |
| 3236.005 | 4810.697 | 0        | 172.6716 | 0        | 3994.525 | 1453.389 | 193.8618 | 2498.904 | 3106.643 | 167.5999 | 561.1621 | 309.7926 | 3364.526 | 6379.031 | 5139.821 |
| 5286.451 | 8301.069 | 57.17778 | 192.7877 | 653.4592 | 4406.571 | 1276.506 | 3522.756 | 3241.336 | 4053.189 | 342.529  | 300.4549 | 947.3013 | 6289.221 | 18712.93 | 15231.9  |
| 5513.379 | 7950.406 | 57.16283 | 192.5349 | 651.1574 | 4281.086 | 1242.404 | 3331.366 | 3118.18  | 4021.229 | 341.4232 | 299.8349 | 950.8454 | 5544.365 | 17321.09 | 13755.36 |
| 2632.069 | 2739.856 | 48.71448 | 171.1902 | 197.9367 | 1674.219 | 519.7908 | 1124.919 | 1432.549 | 2256.403 | 144.9253 | 293.9699 | 609.9211 | 1796.152 | 7031.701 | 4949.37  |
| 18.29705 | 11.24872 | 606.3429 | 153.8635 | 1143.077 | 276.2169 | 49.64065 | 53.74324 | 76.29176 | 171.3685 | 69.59386 | 33.02861 | 127.2601 | 16.97047 | 3.218993 | 1.744548 |
| 3253.235 | 2612.768 | 32.99057 | 85.50208 | 0        | 395.2318 | 228.4072 | 19.68409 | 1366.012 | 1745.096 | 130.3145 | 304.2239 | 457.1365 | 1985.185 | 8107.873 | 5849.92  |

|          |          |          |          |          |          |          |          |          |          |          |          |          |          |          |          |
|----------|----------|----------|----------|----------|----------|----------|----------|----------|----------|----------|----------|----------|----------|----------|----------|
| 1743.468 | 2871.274 | 0        | 89.64733 | 0        | 1739.723 | 768.9529 | 1821.536 | 1034.613 | 1459.609 | 142.3815 | 285.6931 | 292.9124 | 1584.726 | 6393.383 | 4665.953 |
| 0        | 0        | 0        | 180.1863 | 0        | 3638.961 | 1367.451 | 148.1365 | 1480.661 | 2913.466 | 419.054  | 493.1662 | 334.3149 | 103.7579 | 0        | 0        |
| 3267.647 | 5530.689 | 14.52756 | 154.1259 | 258.2622 | 2645.703 | 1052.357 | 1113.859 | 1845.487 | 2083.338 | 258.9615 | 560.4771 | 475.2769 | 3542.589 | 11137.62 | 8781.308 |
| 5024.411 | 7456.644 | 50.04743 | 168.9061 | 573.019  | 3926.317 | 1123.899 | 3142.764 | 2882.137 | 3623.203 | 300.4384 | 263.2066 | 835.7654 | 5643.308 | 17216.11 | 13813.51 |
| 2347.633 | 4603.601 | 226.05   | 334.1623 | 882.3072 | 706.8764 | 168.5431 | 930.7828 | 1365.777 | 2241.509 | 1061.712 | 151.0757 | 981.8033 | 661.2759 | 3464.844 | 2901.729 |
| 2694.914 | 2002.531 | 0        | 208.6078 | 0        | 1679.713 | 558.7689 | 1381.998 | 1569.807 | 2476.544 | 243.3602 | 250.3876 | 224.2707 | 765.0368 | 4591.657 | 3837.576 |
| 4512.369 | 4800.426 | 43.71213 | 389.0017 | 0        | 1751.912 | 575.95   | 1381.139 | 2125.929 | 2717.426 | 95.30357 | 391.0588 | 314.4113 | 2434.55  | 10172.37 | 7445.77  |
| 5337.675 | 5388.994 | 17.70292 | 465.0978 | 0        | 1568.53  | 670.1861 | 1616.112 | 2498.195 | 3623.372 | 147.8125 | 408.3249 | 311.1697 | 2830.8   | 16610.51 | 12968.23 |
| 396.7708 | 606.9611 | 0        | 39.6889  | 537.0927 | 1410.026 | 856.9606 | 1508.15  | 390.474  | 749.762  | 169.3025 | 505.4004 | 301.4799 | 1168.499 | 898.1061 | 602.6189 |
| 30.59462 | 452.7603 | 188.3395 | 18.18589 | 507.6166 | 61.88993 | 125.0251 | 34.51378 | 156.1832 | 325.6494 | 139.4707 | 244.0222 | 606.3779 | 0        | 0        | 15.78953 |
| 1404.609 | 826.7184 | 32.72967 | 211.7337 | 427.884  | 2885.456 | 1447.042 | 1771.876 | 1366.075 | 1563.996 | 104.8335 | 294.1996 | 1283.856 | 246.4846 | 736.1498 | 520.597  |
| 369.5459 | 626.393  | 341.4295 | 301.8248 | 60.53199 | 166.0586 | 105.2321 | 18.04819 | 39.367   | 25.40121 | 71.62639 | 165.8371 | 289.5792 | 98.19606 | 602.4772 | 0        |
| 4641.327 | 5043.815 | 17.03389 | 185.9028 | 0        | 2115.749 | 980.3017 | 1193.101 | 1951.621 | 2668.88  | 373.9116 | 594.8935 | 546.5314 | 4135.409 | 16765.75 | 14646.83 |
| 0        | 0        | 57.58387 | 0        | 0        | 340.933  | 462.7641 | 91.85458 | 0        | 908.5467 | 544.929  | 0        | 0        | 0        | 0        | 0        |
| 3613.744 | 3862.145 | 13.1491  | 88.48049 | 164.8207 | 2281.112 | 700.2636 | 830.5325 | 1577.674 | 2020.934 | 147.0195 | 617.7741 | 460.6759 | 2395.575 | 11418.93 | 8604.093 |
| 1459.824 | 5308.874 | 13.15071 | 179.525  | 0        | 639.2792 | 430.4012 | 4611.458 | 2433.497 | 3875.27  | 328.819  | 149.0402 | 87.18785 | 274.6134 | 14387.39 | 11845.95 |
| 2812.902 | 4087.875 | 24.57125 | 109.2788 | 0        | 1954.399 | 1458.666 | 11.57377 | 1551.261 | 1562.009 | 325.5937 | 254.2659 | 320.1967 | 4027.386 | 10837.39 | 8192.701 |
| 2281.143 | 3437.81  | 170.5849 | 167.0017 | 54.65366 | 1447.013 | 450.3611 | 1503.246 | 1347.743 | 2152.937 | 446.238  | 197.57   | 196.3229 | 2025.911 | 8486.781 | 6428.559 |
| 0        | 221.1916 | 89.49924 | 41.27019 | 231.4278 | 348.9177 | 83.77523 | 126.8451 | 33.07367 | 72.66407 | 114.5348 | 0        | 94.21466 | 0        | 0        | 0        |
| 0        | 221.1916 | 89.49924 | 41.27019 | 231.4278 | 348.9177 | 83.77523 | 126.8451 | 33.07367 | 72.66407 | 114.5348 | 0        | 94.21466 | 0        | 0        | 0        |
| 0        | 221.1916 | 89.49924 | 41.27019 | 231.4278 | 348.9177 | 83.77523 | 126.8451 | 33.07367 | 72.66407 | 114.5348 | 0        | 94.21466 | 0        | 0        | 0        |
| 690.1643 | 573.8783 | 482.001  | 953.9483 | 49.22271 | 612.6112 | 759.3471 | 214.3993 | 198.3487 | 465.3354 | 13.81865 | 106.2638 | 405.8111 | 16.10483 | 2363.213 | 1983.91  |
| 2963.158 | 5152.947 | 45.93784 | 59.54754 | 0        | 3105.954 | 912.6113 | 1873.699 | 1729.904 | 2294.344 | 338.8966 | 299.7466 | 200.6409 | 3389.977 | 9252.838 | 7342.255 |
| 403.5526 | 437.0805 | 433.8019 | 273.7028 | 789.7245 | 2205.468 | 1456.114 | 1117.954 | 1838.999 | 2734.316 | 627.7872 | 270.27   | 1522.932 | 575.483  | 1423.525 | 1140.072 |
| 1719.008 | 2742.81  | 0        | 0        | 0        | 473.2667 | 146.8189 | 0        | 1677.116 | 2106.415 | 59.21536 | 218.3607 | 242.5753 | 1899.034 | 8558.037 | 7325.582 |
| 2359.615 | 6524.318 | 0        | 153.4906 | 0        | 555.7135 | 334.7034 | 0        | 775.6313 | 2366.965 | 36.04778 | 458.5935 | 309.7825 | 921.9667 | 996.4644 | 764.7179 |
| 2085.425 | 7092.782 | 0        | 118.968  | 0        | 1240.721 | 474.6632 | 255.8634 | 1795.236 | 1850.826 | 245.437  | 278.3271 | 257.7025 | 1791.44  | 9969.466 | 7306.069 |
| 3286.241 | 4648.616 | 28.61603 | 96.75423 | 329.4107 | 2353.075 | 652.418  | 1903.332 | 1763.009 | 2173.07  | 172.7221 | 150.9185 | 482.3824 | 3570.975 | 12551.68 | 9690.482 |
| 0        | 20.61866 | 0        | 6.338697 | 0        | 0        | 65.41067 | 129.1168 | 0        | 0        | 35.57732 | 0        | 0        | 0        | 0        | 109.059  |
| 0        | 502.7045 | 27.44608 | 761.9314 | 903.7228 | 21.58133 | 36.35203 | 60.58974 | 31.33937 | 34.36076 | 350.2567 | 1810.524 | 964.9159 | 0        | 0        | 0        |
| 0        | 0        | 18.62774 | 106.2619 | 236.9241 | 1903.823 | 881.0229 | 661.3736 | 899.5559 | 996.7096 | 61.68378 | 171.1562 | 786.733  | 175.2298 | 0        | 0        |
| 0        | 115.1724 | 270.3487 | 227.8572 | 846.8697 | 0        | 0        | 0        | 0        | 0        | 0        | 0        | 423.1343 | 0        | 2034.017 | 504.6418 |
| 2861.436 | 2898.557 | 50.56804 | 89.09972 | 201.9517 | 1454.091 | 529.6886 | 48.24386 | 1422.083 | 1920.778 | 104.1197 | 253.451  | 661.39   | 1714.038 | 6977.822 | 5186.646 |
| 2335.019 | 3199.429 | 269.3521 | 872.7153 | 45.00693 | 4162.134 | 1692.845 | 153.1638 | 1901.502 | 2248.052 | 560.2289 | 215.7873 | 182.0996 | 1899.289 | 4922.563 | 3716.67  |
| 151.5643 | 1173.523 | 382.3721 | 905.2274 | 400.304  | 289.3401 | 396.9189 | 123.4751 | 200.6018 | 470.9719 | 373.8465 | 401.8736 | 1279.96  | 326.5837 | 195.2824 | 590.5726 |

|          |          |          |          |          |          |          |          |          |          |          |          |          |          |          |          |
|----------|----------|----------|----------|----------|----------|----------|----------|----------|----------|----------|----------|----------|----------|----------|----------|
| 0        | 0        | 2476.717 | 2369.592 | 738.2234 | 733.3207 | 2239.68  | 0        | 749.1303 | 1316.586 | 2305.957 | 2013.681 | 5050.638 | 0        | 0        | 0        |
| 1995.341 | 2298.428 | 127.6409 | 61.7346  | 106.5957 | 520.714  | 364.6715 | 80.19356 | 1826.539 | 1996.847 | 193.9171 | 207.8508 | 686.6534 | 2419.045 | 8108.287 | 6255.258 |
| 2968.74  | 4138.068 | 30.18014 | 108.3172 | 0        | 1458.049 | 1178.671 | 14.30253 | 1585.928 | 1654.233 | 381.5143 | 306.0323 | 393.1892 | 3221.168 | 10216.95 | 7652.843 |
| 243.9764 | 59.13337 | 18.2845  | 99.95592 | 189.8531 | 2633.294 | 990.7145 | 322.5871 | 784.6468 | 977.025  | 360.2202 | 147.5008 | 297.7474 | 170.7693 | 1681.013 | 119.878  |
| 760.1482 | 2159.197 | 297.8614 | 525.5072 | 162.4901 | 499.6926 | 81.57753 | 52.87198 | 680.5536 | 1232.186 | 550.7599 | 1993.608 | 1277.251 | 0        | 2521.121 | 974.1897 |
| 1478.541 | 3025.879 | 42.34114 | 100.6475 | 0        | 793.3262 | 324.9031 | 375.0221 | 979.4043 | 980.7827 | 174.7103 | 54.06481 | 259.0906 | 1493.131 | 5741.345 | 4316.128 |
| 0        | 0        | 17.39244 | 56.44486 | 188.0731 | 1096.787 | 424.7754 | 161.9031 | 426.6304 | 507.0115 | 42.79691 | 116.584  | 729.9406 | 130.8742 | 0        | 0        |
| 272.7298 | 621.1885 | 151.2038 | 300.1295 | 247.7882 | 3147.549 | 802.5284 | 102.5153 | 343.5519 | 2051.695 | 249.5784 | 170.1741 | 389.6588 | 92.63056 | 1225.291 | 151.6739 |
| 2437.543 | 2569.739 | 0        | 78.29485 | 0        | 1582.931 | 645.5325 | 24.45397 | 1263.418 | 1855.549 | 156.4002 | 442.7832 | 239.5763 | 1580.444 | 7307.78  | 5199.623 |
| 59.71163 | 42.87383 | 184.5638 | 72.89713 | 0        | 0        | 0        | 0        | 0        | 0        | 0        | 0        | 315.8793 | 0        | 1572.846 | 363.4816 |
| 3229.694 | 3998.725 | 0        | 249.155  | 51.88462 | 3180.944 | 1047.808 | 1912.004 | 2029.716 | 2292.496 | 279.31   | 269.2376 | 344.8715 | 2421.373 | 10081.89 | 8359.292 |
| 43.91813 | 1258.821 | 0        | 21.57309 | 0        | 521.2862 | 371.8924 | 205.8937 | 410.9198 | 708.2945 | 69.22811 | 135.7944 | 142.226  | 0        | 0        | 203.0822 |
| 2100.315 | 1999.848 | 0        | 15.79262 | 0        | 1229.723 | 393.3075 | 1497.875 | 771.4121 | 1107.006 | 51.22464 | 153.3705 | 70.10689 | 1358.497 | 5924.809 | 4330.82  |
| 927.9369 | 1480.229 | 5210.847 | 3072.912 | 13257.97 | 5520.704 | 10943.48 | 967.3767 | 919.069  | 711.5079 | 233.0745 | 209.4495 | 350.7328 | 1171.425 | 3033.295 | 2334.585 |
| 0        | 0        | 232.205  | 0        | 53.08303 | 71.21136 | 0        | 0        | 190.7479 | 298.5587 | 107.6002 | 443.2941 | 0        | 0        | 0        | 0        |
| 628.4041 | 956.3032 | 0        | 15.62952 | 0        | 2246.271 | 703.2647 | 390.8874 | 707.5374 | 697.2914 | 30.2791  | 14.15702 | 14.47074 | 519.5829 | 3118.394 | 1397.371 |
| 1664.245 | 1871.75  | 42.44435 | 100.3141 | 0        | 2084.898 | 607.0433 | 1226.422 | 677.5995 | 1146.912 | 46.6299  | 346.2637 | 81.58852 | 940.224  | 4351.356 | 1402.66  |
| 1384.546 | 2156.662 | 14.81661 | 64.29226 | 0        | 1422.843 | 448.7882 | 773.3253 | 661.4516 | 840.4826 | 35.32547 | 128.6999 | 125.3651 | 849.91   | 8123.803 | 6543     |
| 0        | 105.7421 | 40.75158 | 19.41431 | 123.2017 | 164.6313 | 38.51433 | 59.53871 | 14.81569 | 32.7544  | 62.10679 | 0        | 45.74377 | 0        | 0        | 0        |
| 10280.74 | 100.8731 | 2375.067 | 105.7773 | 1112.993 | 2947.904 | 2368.696 | 4514.676 | 213.8376 | 0        | 300.4301 | 0        | 43.55807 | 0        | 121.2194 | 67.00747 |
| 0        | 875.1413 | 212.125  | 13.0918  | 0        | 56.35878 | 0        | 0        | 27.90163 | 429.0715 | 310.2048 | 0        | 0        | 0        | 0        | 0        |
| 953.7284 | 1885.343 | 0        | 47.67747 | 0        | 1183.615 | 301.1211 | 30.87851 | 1401.607 | 1652.915 | 98.76429 | 169.0044 | 109.6982 | 72.9267  | 4092.421 | 606.1075 |
| 1384.388 | 1946.343 | 0        | 11.92059 | 0        | 1802.394 | 644.5029 | 834.3514 | 1029.385 | 354.6687 | 14.86941 | 75.82843 | 56.29788 | 1196.809 | 1581.314 | 657.4684 |
| 607.1758 | 1736.408 | 0        | 44.58819 | 0        | 333.6006 | 187.1893 | 909.0203 | 805.2249 | 1245.939 | 76.95408 | 48.58477 | 59.45632 | 5.553266 | 5757.254 | 4809.966 |
| 33.25306 | 308.7882 | 0        | 0        | 0        | 68.33813 | 0        | 0        | 1177.727 | 912.9103 | 58.66666 | 0        | 0        | 0        | 5050.8   | 4677.932 |
| 2310.233 | 1837.336 | 0        | 34.14503 | 0        | 1000.507 | 334.229  | 10.67694 | 1013.656 | 1438.509 | 88.41046 | 222.8904 | 121.5158 | 1439.735 | 5796.319 | 4285.649 |
| 2310.233 | 1837.336 | 0        | 34.14503 | 0        | 1000.507 | 334.229  | 10.67694 | 1013.656 | 1438.509 | 88.41046 | 222.8904 | 121.5158 | 1439.735 | 5796.319 | 4285.649 |
| 0        | 0        | 0        | 13.05048 | 0        | 94.40347 | 17.96559 | 0        | 30.65439 | 55.73988 | 8.308919 | 0        | 0        | 0        | 2923.284 | 1648.509 |
| 2889.473 | 62.17903 | 1874.924 | 31.69988 | 905.1435 | 3026.125 | 2750.716 | 1383.896 | 3226.207 | 3443.222 | 4407.015 | 36.97668 | 914.9946 | 0        | 0        | 0        |
| 112.2939 | 459.5844 | 0        | 10.91325 | 0        | 103.7323 | 13.1407  | 66.0597  | 382.4277 | 341.8735 | 8.859055 | 14.07067 | 14.2742  | 285.6589 | 133.014  | 358.4167 |
| 728.8518 | 674.8101 | 0        | 6.70574  | 0        | 999.3426 | 307.6634 | 1515.869 | 1066.643 | 1265.654 | 93.12833 | 63.53803 | 64.06765 | 907.9813 | 2185.583 | 1910.146 |
| 1493.277 | 1555.311 | 0        | 34.69991 | 0        | 1620.292 | 425.7537 | 534.5051 | 1062.905 | 1386.28  | 58.88743 | 115.8518 | 97.01486 | 1211.446 | 6215.031 | 4793.142 |
| 659.1359 | 586.0953 | 0        | 5.835987 | 0        | 960.9898 | 293.0455 | 1637.493 | 1129.532 | 1258.242 | 105.5947 | 57.86652 | 57.91669 | 832.1727 | 1951.026 | 1743.047 |
| 29.71788 | 162.1519 | 0        | 94.22068 | 70.67942 | 87.28992 | 90.65421 | 16.3016  | 137.3762 | 111.3036 | 338.9652 | 609.184  | 1267.883 | 0        | 0        | 0        |
| 37.7999  | 937.6047 | 0        | 49.78653 | 0        | 426.7245 | 251.3595 | 155.7469 | 373.2095 | 604.9559 | 64.84918 | 53.7054  | 48.96327 | 0        | 0        | 176.3254 |



|          |          |          |          |          |          |          |          |          |          |          |          |          |          |          |          |
|----------|----------|----------|----------|----------|----------|----------|----------|----------|----------|----------|----------|----------|----------|----------|----------|
| 682.0033 | 1115.766 | 0        | 0        | 0        | 341.8714 | 110.5051 | 820.5229 | 300.5383 | 370.4338 | 20.21823 | 47.44629 | 20.24316 | 363.6453 | 1554.934 | 1199.602 |
| 385.1621 | 344.9713 | 0        | 0        | 0        | 133.3787 | 57.44134 | 0        | 425.8412 | 598.5212 | 9.652274 | 10.92866 | 5.729706 | 487.206  | 1954.205 | 1648.869 |
| 164.8397 | 187.7383 | 0        | 0        | 0        | 54.17803 | 27.72543 | 415.6479 | 248.0621 | 281.4908 | 9.899497 | 21.10906 | 0        | 299.0743 | 805.9964 | 599.3929 |
| 406.8943 | 343.3402 | 0        | 0        | 0        | 133.2088 | 67.82335 | 11.34542 | 408.6596 | 602.1721 | 8.66656  | 9.802035 | 5.231241 | 459.8454 | 2601.626 | 2138.239 |
| 0        | 0        | 0        | 17.57389 | 0        | 711.0906 | 199.1939 | 737.6274 | 73.44927 | 16.45371 | 0        | 0        | 0        | 3.661266 | 0        | 0        |
| 0        | 0        | 0        | 0        | 0        | 72.28446 | 29.87921 | 0        | 27.20325 | 28.14705 | 33.83751 | 0        | 15.27495 | 0        | 0        | 0        |
| 347.2105 | 64.39976 | 0        | 36.98659 | 0        | 242.5036 | 95.93498 | 0        | 0        | 253.1793 | 4.762636 | 21.01062 | 28.64317 | 27.71019 | 43.22053 | 0        |
| 1613.73  | 2096.228 | 0        | 0        | 0        | 2413.146 | 726.0851 | 134.8679 | 729.069  | 809.4836 | 106.5271 | 45.6898  | 122.0989 | 0        | 478.7181 | 425.8945 |
| 62.19799 | 0        | 0        | 7.003571 | 0        | 21.5941  | 87.75537 | 0        | 0        | 36.66295 | 27.18195 | 0        | 3.734098 | 0        | 125.3177 | 0        |
| 241.7653 | 201.9832 | 0        | 0        | 0        | 77.26967 | 39.41403 | 6.496449 | 243.2381 | 358.8293 | 4.997448 | 5.618573 | 2.995782 | 276.926  | 1586.093 | 1321.942 |
| 90.77222 | 346.4786 | 0        | 12.3953  | 0        | 55.07271 | 18.0779  | 55.40167 | 117.8129 | 102.0168 | 12.88777 | 42.40257 | 20.65088 | 0        | 0        | 45.58294 |
| 19.16789 | 184.7969 | 0        | 0        | 0        | 339.9155 | 165.6909 | 70.69934 | 120.9884 | 55.22082 | 54.42472 | 0        | 0        | 3.448694 | 494.8899 | 18.91758 |
| 838.8745 | 598.1862 | 0        | 3.049344 | 0        | 180.8468 | 57.88095 | 848.5143 | 411.8136 | 370.5392 | 28.18176 | 423.7376 | 420.1509 | 231.529  | 1786.191 | 1108.496 |
| 16.67916 | 30.86275 | 12.91871 | 40.60491 | 22.44893 | 76.6495  | 142.06   | 23.58654 | 32.43705 | 6.075227 | 44.47236 | 31.34703 | 266.628  | 11.14078 | 0        | 112.3737 |
| 355.0223 | 204.9993 | 0        | 0        | 0        | 101.8749 | 56.19791 | 0        | 296.9594 | 228.3361 | 0        | 33.29731 | 12.58474 | 357.9957 | 1029.626 | 176.0935 |
| 0        | 0        | 0        | 0        | 0        | 0        | 0        | 0        | 0        | 0        | 0        | 0        | 0        | 0        | 0        | 0        |
| 322.8188 | 183.2307 | 0        | 0        | 0        | 90.93286 | 50.2946  | 0        | 268.1086 | 205.0744 | 0        | 30.14535 | 11.30987 | 323.0995 | 927.2332 | 156.956  |
| 0        | 0        | 0        | 0        | 0        | 0        | 0        | 0        | 0        | 0        | 0        | 0        | 0        | 0        | 0        | 0        |
| 595.7674 | 66.17024 | 0        | 0        | 0        | 23.95962 | 39.85068 | 0        | 118.2966 | 239.463  | 5.61181  | 36.52513 | 24.5844  | 250.3921 | 2151.924 | 1826.151 |
| 795.5825 | 578.7423 | 0        | 3.092509 | 0        | 180.5336 | 58.60003 | 960.7562 | 394.5244 | 365.0519 | 28.87812 | 34.70577 | 59.79305 | 226.5158 | 1728.102 | 1071.804 |
| 686.0103 | 506.0089 | 0        | 36.62044 | 0        | 863.5995 | 297.2191 | 1059.736 | 366.031  | 505.4624 | 12.13223 | 38.08125 | 9.271003 | 309.0783 | 3325.897 | 2440.585 |
| 0        | 0        | 0        | 0        | 0        | 338.8152 | 90.11469 | 0        | 0        | 0        | 0        | 0        | 0        | 18.32935 | 0        | 0        |
| 0        | 0        | 0        | 0        | 0        | 0        | 0        | 0        | 0        | 0        | 0        | 0        | 0        | 0        | 0        | 0        |
| 0        | 61.02359 | 0        | 111.7587 | 20.53333 | 37.08418 | 27.8945  | 0        | 103.1063 | 47.03411 | 171.7137 | 16.58164 | 136.7607 | 112.2182 | 155.9858 | 223.6901 |
| 0        | 0        | 0        | 112.7481 | 0        | 1717.92  | 861.6136 | 0        | 1279.558 | 1942.467 | 158.4101 | 0        | 250.1323 | 0        | 7724.894 | 5382.738 |
| 0        | 42.75337 | 0        | 79.40426 | 14.38098 | 25.99254 | 19.55228 | 0        | 72.76593 | 33.00051 | 128.5784 | 11.61195 | 96.3958  | 79.09583 | 109.5457 | 157.0621 |
| 0        | 1106.914 | 0        | 239.8332 | 0        | 219.4116 | 0        | 0        | 558.9701 | 266.2918 | 196.5732 | 0        | 558.312  | 0        | 0        | 0        |
| 0        | 0        | 0        | 0        | 0        | 0        | 0        | 0        | 0        | 0        | 0        | 0        | 0        | 0        | 0        | 0        |
| 0        | 65.85281 | 0        | 0        | 0        | 37.54037 | 0        | 0        | 41.59149 | 21.87452 | 0        | 0        | 0        | 0        | 0        | 0        |
| 1062.937 | 366.6646 | 0        | 40.3953  | 0        | 1189.524 | 421.3685 | 131.9411 | 331.7225 | 467.7244 | 5.137903 | 58.91035 | 79.28642 | 281.0522 | 4907.203 | 3819.986 |
| 414.3303 | 1498.659 | 0        | 0        | 0        | 32.91072 | 61.35497 | 11.31328 | 490.1016 | 530.9085 | 28.84033 | 0        | 0        | 938.2503 | 760.2511 | 35.35172 |
| 0        | 0        | 0        | 0        | 0        | 1491.376 | 355.0095 | 25.67944 | 10.58466 | 0        | 0        | 0        | 0        | 0        | 0        | 0        |
| 0        | 0        | 0        | 65.31543 | 0        | 14.44349 | 10.6867  | 0        | 131.4836 | 110.6823 | 105.0714 | 15.11502 | 151.5445 | 0        | 98.6525  | 171.549  |
| 12.86519 | 92.78439 | 0        | 151.2898 | 16.80547 | 48.69026 | 13.80967 | 36.62327 | 119.5004 | 96.51571 | 104.0387 | 50.2401  | 203.4226 | 0        | 90.41025 | 166.2505 |
| 325.017  | 0        | 0        | 4.955503 | 0        | 620.9829 | 295.4536 | 19.89849 | 183.717  | 337.1155 | 7.592243 | 50.43281 | 40.82876 | 0        | 0        | 0        |

|          |          |          |          |          |          |          |          |          |          |          |          |          |          |          |          |
|----------|----------|----------|----------|----------|----------|----------|----------|----------|----------|----------|----------|----------|----------|----------|----------|
| 0        | 90.10435 | 7.966297 | 14.09684 | 0        | 41.9554  | 0        | 24.25197 | 10.49382 | 0        | 0        | 27.13944 | 20.27599 | 0        | 14.81096 | 0        |
| 0        | 0        | 0        | 44.20222 | 0        | 0        | 0        | 0        | 0        | 0        | 0        | 0        | 0        | 18.04413 | 133.6274 | 0        |
| 0        | 0        | 0        | 0        | 0        | 895.295  | 294.0319 | 748.9942 | 97.65007 | 26.78091 | 0        | 0        | 0        | 0        | 0        | 0        |
| 0        | 0        | 0        | 0        | 0        | 1172.092 | 357.6038 | 55.12965 | 55.98134 | 21.93114 | 0        | 0        | 0        | 0        | 0        | 0        |
| 0        | 0        | 0        | 0        | 25.90904 | 0        | 0        | 0        | 52.37283 | 92.19312 | 86.94293 | 0        | 0        | 0        | 0        | 0        |
| 490.7611 | 797.4855 | 0        | 0        | 0        | 66.33348 | 16.29335 | 0        | 256.6621 | 185.2705 | 0        | 5.826559 | 0        | 0        | 1810.66  | 1570.324 |
| 0        | 0        | 0        | 10.40445 | 0        | 886.5596 | 245.7642 | 701.7255 | 75.00658 | 19.66844 | 0        | 0        | 0        | 4.944218 | 0        | 0        |
| 0        | 0        | 0        | 10.40445 | 0        | 886.5596 | 245.7642 | 701.7255 | 75.00658 | 19.66844 | 0        | 0        | 0        | 4.944218 | 0        | 0        |
| 0        | 2500.718 | 4562.994 | 2439.856 | 850.1279 | 114.8418 | 130.6872 | 53.70232 | 22.02426 | 75.21809 | 41.61947 | 147.3871 | 129.8933 | 0        | 0        | 0        |
| 0        | 0        | 0        | 0        | 0        | 82.15146 | 0        | 0        | 76.67971 | 50.56827 | 0        | 0        | 0        | 37.72849 | 0        | 0        |
| 0        | 0        | 0        | 0        | 0        | 63.78018 | 0        | 0        | 64.95841 | 40.07771 | 0        | 0        | 0        | 30.32208 | 0        | 0        |
| 490.7611 | 797.4855 | 0        | 0        | 0        | 66.33348 | 9.299678 | 0        | 249.8115 | 125.2935 | 0        | 5.826559 | 0        | 0        | 1810.66  | 1570.324 |
| 0        | 0        | 0        | 0        | 0        | 39.00332 | 0        | 0        | 19.01618 | 10.08691 | 0        | 0        | 0        | 0        | 0        | 0        |
| 0        | 0        | 123.2306 | 29.77331 | 427.2715 | 62.06651 | 0        | 494.1941 | 60.96567 | 32.42053 | 135.9309 | 31.85021 | 15.80668 | 0        | 0        | 0        |
| 0        | 0        | 0        | 0        | 0        | 43.7625  | 52.34257 | 0        | 42.60791 | 38.42765 | 0        | 0        | 0        | 0        | 0        | 0        |
| 0        | 0        | 0        | 33.84711 | 0        | 720.3042 | 157.634  | 13.66802 | 49.89709 | 56.99661 | 0        | 0        | 0        | 0        | 0        | 0        |
| 1941.727 | 328.5674 | 0        | 59.75104 | 0        | 2192.51  | 481.9375 | 0        | 508.9805 | 531.7443 | 30.03719 | 0        | 0        | 29.28592 | 1886.102 | 129.5014 |
| 1922.113 | 314.1189 | 0        | 57.67667 | 0        | 2230.104 | 474.7915 | 0        | 493.2789 | 514.9475 | 28.78484 | 0        | 0        | 27.93697 | 1815.435 | 123.5633 |
| 0        | 0        | 0        | 0        | 0        | 308.3252 | 389.5418 | 92.37225 | 296.8802 | 267.5716 | 208.7737 | 0        | 0        | 0        | 0        | 0        |
| 0        | 0        | 0        | 0        | 0        | 797.1995 | 171.9702 | 228.8544 | 37.25307 | 14.58041 | 0        | 0        | 0        | 0        | 0        | 0        |
| 0        | 0        | 0        | 25.12727 | 0        | 27.88073 | 95.71678 | 0        | 13.65049 | 48.40677 | 14.44354 | 0        | 144.5526 | 0        | 149.0639 | 0        |
| 0        | 0        | 0        | 124.3321 | 0        | 1102.552 | 288.5879 | 0        | 21.21402 | 0        | 0        | 0        | 0        | 0        | 0        | 0        |
| 0        | 0        | 0        | 0        | 0        | 26.56236 | 0        | 0        | 12.63935 | 28.0648  | 0        | 0        | 0        | 0        | 0        | 0        |
| 0        | 0        | 0        | 0        | 0        | 816.8286 | 164.4363 | 182.2332 | 30.67296 | 16.39899 | 5.834884 | 0        | 0        | 0        | 0        | 0        |
| 0        | 0        | 0        | 5.82119  | 0        | 364.4106 | 141.5012 | 0        | 17.89124 | 0        | 0        | 0        | 0        | 0        | 0        | 0        |
| 0        | 0        | 0        | 0        | 0        | 0        | 0        | 0        | 0        | 0        | 0        | 0        | 0        | 5.711891 | 125.2229 | 0        |
| 0        | 0        | 0        | 0        | 0        | 0        | 28.82964 | 0        | 8.388832 | 0        | 0        | 0        | 0        | 0        | 0        | 0        |
| 0        | 0        | 0        | 0        | 0        | 347.6241 | 151.7689 | 0        | 0        | 0        | 0        | 0        | 0        | 0        | 0        | 0        |
| 0        | 0        | 0        | 0        | 0        | 0        | 0        | 0        | 0        | 0        | 0        | 0        | 0        | 0        | 0        | 0        |
| 0        | 0        | 0        | 0        | 0        | 158.9113 | 105.376  | 7.409894 | 0        | 0        | 0        | 0        | 0        | 0        | 0        | 0        |
| 0        | 0        | 1719.889 | 346.4574 | 10436.89 | 0        | 0        | 0        | 157.4539 | 92.56234 | 2458.341 | 7012.901 | 5479.115 | 9026.29  | 0        | 0        |
| 0        | 0        | 0        | 0        | 0        | 110.2002 | 0        | 0        | 587.6689 | 130.709  | 136.8038 | 0        | 0        | 0        | 0        | 0        |
| 0        | 0        | 0        | 0        | 0        | 110.2002 | 0        | 0        | 587.6689 | 130.709  | 136.8038 | 0        | 0        | 0        | 0        | 0        |
| 0        | 0        | 0        | 0        | 0        | 110.2002 | 0        | 0        | 587.6689 | 130.709  | 136.8038 | 0        | 0        | 0        | 0        | 0        |
| 87.66059 | 0        | 8.026994 | 0        | 0        | 45.17899 | 1.839226 | 0        | 47.65079 | 48.43433 | 57.54529 | 60.94552 | 0        | 0        | 418.8566 | 199.1672 |









| AP016_3  | AP017_1  | AP017_2  | AP017_3  | AP018_1  | AP018_2  | AP018_3  | AP019_1  | AP019_2  | AP019_3  | AP020_1  | AP020_2  | AP020_3  |
|----------|----------|----------|----------|----------|----------|----------|----------|----------|----------|----------|----------|----------|
| 10675109 | 7314196  | 10751330 | 14464088 | 16515073 | 26760654 | 20629126 | 19078423 | 14407470 | 19613216 | 22230899 | 18903819 | 13527581 |
| 67841868 | 41417511 | 56806555 | 66779927 | 52097473 | 55456224 | 68614485 | 1.08E+08 | 87167869 | 1.25E+08 | 94277613 | 78742919 | 57302519 |
| 47966.41 | 42881.44 | 63353.12 | 57270.96 | 33691.61 | 31243.95 | 44349.64 | 49399.36 | 50220.48 | 58522.14 | 86297.46 | 65401.2  | 50187.08 |
| 33298.02 | 23218.38 | 30241.54 | 27498.15 | 27121.55 | 25815.29 | 35530.43 | 41979.1  | 31645.39 | 53941.28 | 69786.08 | 54409.26 | 40130.23 |
| 31895.84 | 23376.92 | 33355.51 | 56649.06 | 32802.16 | 35136.34 | 42027.75 | 57601.15 | 38959.98 | 68536.78 | 68522.04 | 59149.71 | 41829.9  |
| 28697.71 | 21624.09 | 30209.68 | 42553.2  | 36729.57 | 33661.47 | 48409.38 | 38500.12 | 30683.4  | 46924.98 | 67333.56 | 56680.56 | 41220.47 |
| 28697.71 | 21624.09 | 30209.68 | 42553.2  | 36729.57 | 33661.47 | 48409.38 | 38500.12 | 30683.4  | 46924.98 | 67333.56 | 56680.56 | 41220.47 |
| 28697.71 | 21624.09 | 30209.68 | 42553.2  | 36729.57 | 33661.47 | 48409.38 | 38500.12 | 30683.4  | 46924.98 | 67333.56 | 56680.56 | 41220.47 |
| 41956.4  | 23977.29 | 31828.93 | 38787.44 | 35865.7  | 35809.64 | 46082.18 | 50159.4  | 36853.73 | 60605.06 | 65109.04 | 50134.13 | 38241.76 |
| 28861.38 | 23904.92 | 33448.23 | 40177.62 | 39491.77 | 29847.49 | 51747.67 | 42694.8  | 34066.9  | 51538.23 | 65214.49 | 58868.38 | 40798.67 |
| 31152.71 | 22368.16 | 30995.58 | 44194.43 | 33796.95 | 27395.13 | 44053.21 | 40392.69 | 33314.7  | 47331.29 | 62321.01 | 53767.32 | 37464.76 |
| 26879.45 | 21364.14 | 28839.67 | 37820.7  | 31727.66 | 25690    | 42289.36 | 39341.32 | 30483.49 | 46414.89 | 64276.97 | 53809.55 | 39256.9  |
| 22929.22 | 19114.47 | 25231.4  | 38465.76 | 25419.38 | 24722.25 | 32925    | 33653.83 | 26895.68 | 40411.01 | 64410.22 | 55207.88 | 39678.82 |
| 29825.88 | 21428.81 | 29203.4  | 41658.28 | 37520.88 | 26995.56 | 48329.38 | 43166.31 | 32513.29 | 51473.14 | 60348.53 | 51073.36 | 37082.9  |
| 29779.03 | 21280.17 | 29437.72 | 41767.17 | 38038.72 | 26830.1  | 49399.42 | 41104.18 | 30692.31 | 49023.33 | 58055.96 | 48573.24 | 36051.93 |
| 29244.19 | 23618.01 | 31058.82 | 34496.46 | 20326.01 | 27439.82 | 25272.3  | 41109.61 | 32187.94 | 49932.23 | 67212.47 | 56667.23 | 39517.46 |
| 27597.72 | 22822.6  | 31993.49 | 45563.09 | 31881.96 | 27022.35 | 41128.9  | 43523.91 | 34369.2  | 52618.32 | 67213.52 | 57009.25 | 41013.26 |
| 28031.57 | 21928.01 | 28217.31 | 30637.65 | 35857.82 | 28720.42 | 47350.04 | 35478.29 | 30609.41 | 40616.35 | 62403.61 | 57152.19 | 37414.05 |
| 29708.84 | 21106.54 | 29126.28 | 41361.23 | 37844.67 | 26647.14 | 49075.39 | 41485.97 | 30750.91 | 49283.92 | 58652.48 | 49340.89 | 36086.6  |
| 28002.35 | 25607.81 | 38466.53 | 42638.83 | 29680.23 | 27386.32 | 38430.89 | 45342.17 | 35052.43 | 55628.27 | 66061.39 | 57127.81 | 40063.19 |
| 27074.02 | 20535.05 | 27744.44 | 30675.27 | 27344.91 | 24589.21 | 35485.9  | 40654.05 | 31592.25 | 50067.51 | 60815.05 | 49553.78 | 37093.62 |
| 28789.35 | 21019.19 | 27604.63 | 41293.5  | 37817.08 | 26403.67 | 48799.97 | 40626.24 | 30866.13 | 48816.14 | 59220.73 | 50206.12 | 36471.3  |
| 28413.69 | 20345.02 | 26865.35 | 35891.89 | 37886.44 | 25694.99 | 48334.8  | 41948.95 | 30264.72 | 49827.31 | 56757.68 | 47060.61 | 35042.77 |
| 26558.7  | 19849.41 | 27570.84 | 32937.72 | 27067.84 | 26038.28 | 34690.44 | 40089.67 | 30425.99 | 49703.44 | 61226.5  | 49671.45 | 37259.29 |
| 26558.7  | 19849.41 | 27570.84 | 32937.72 | 27067.84 | 26038.28 | 34690.44 | 40089.67 | 30425.99 | 49703.44 | 61226.5  | 49671.45 | 37259.29 |
| 36165.13 | 22426.44 | 27503.64 | 32284.45 | 27136.46 | 31185.36 | 36317.68 | 66913.86 | 42873.98 | 80845.73 | 55832.65 | 39009.46 | 33578.53 |
| 24384.09 | 21120.24 | 30233.08 | 37792.93 | 29581.11 | 23246.38 | 39259.34 | 36898.77 | 27901.36 | 44190.13 | 61994.92 | 51841.68 | 37832.38 |
| 30874.51 | 21448.41 | 28376.27 | 46016.04 | 30031.57 | 26912.93 | 39886.85 | 39363.5  | 31521.31 | 46256.85 | 58420.42 | 47854.28 | 34837.68 |
| 27185.01 | 20026.97 | 27914.41 | 35999.62 | 38556.35 | 28309.41 | 49032.58 | 40023.45 | 30666.75 | 49559.7  | 57860.35 | 48852.02 | 35051.27 |
| 27274.03 | 20574.69 | 30484.83 | 31348.92 | 28747.54 | 22595.35 | 38816.59 | 41153.28 | 32646.22 | 50675.14 | 59130.98 | 50149.24 | 35413.52 |
| 27274.03 | 20585.13 | 30486.1  | 31381.43 | 28747.54 | 22618.35 | 38816.59 | 41153.28 | 32646.22 | 50675.14 | 59130.98 | 50240.36 | 35413.52 |
| 27204.18 | 20220.57 | 27237.47 | 34719.35 | 33643.78 | 28172.19 | 43095.31 | 40732.84 | 30612.79 | 49480.04 | 58345.93 | 50738.9  | 35361.59 |
| 23389    | 20277.08 | 28645.9  | 35812.12 | 27915.49 | 21379.32 | 36996.67 | 36456.86 | 26722.87 | 43708.54 | 59279.21 | 49742.16 | 35940.82 |

|          |          |          |          |          |          |          |          |          |          |          |          |          |
|----------|----------|----------|----------|----------|----------|----------|----------|----------|----------|----------|----------|----------|
| 23389    | 20277.08 | 28551.76 | 35812.12 | 27915.49 | 21379.32 | 36996.67 | 34365.44 | 26011.46 | 41325.28 | 59279.21 | 49742.16 | 35940.82 |
| 31525.47 | 21991.51 | 30679.76 | 31607.42 | 25636.53 | 26912.3  | 32640.38 | 39521.69 | 32352.65 | 49732.67 | 60120.99 | 46540.62 | 36599.2  |
| 26133.37 | 16274.38 | 24051.56 | 49851.25 | 35325.24 | 21632.2  | 47767.47 | 35891.67 | 23185.67 | 43944.22 | 36894.09 | 27353.2  | 26325.53 |
| 26202.07 | 18298.72 | 27020.95 | 38104.32 | 29722.58 | 27812.61 | 38171.33 | 36878.3  | 28601.97 | 45237.44 | 54644.08 | 43292.98 | 33578.26 |
| 26028.54 | 17998.04 | 24531.72 | 37888.74 | 28230.2  | 26138.53 | 36870.96 | 36518.11 | 29934.44 | 44924.13 | 56577.01 | 45653.94 | 34613.42 |
| 26849.18 | 21927.83 | 28064.93 | 28123.43 | 14861.39 | 23175.99 | 18301.95 | 36775.87 | 29680.27 | 44598.55 | 63062.94 | 52787.21 | 36607.87 |
| 30887.75 | 18742.58 | 27345.87 | 43949.85 | 27484.38 | 24480.13 | 35970.12 | 38445.61 | 29525    | 45397.6  | 46706.35 | 43136.58 | 29856.16 |
| 27668.1  | 20789.49 | 24096.85 | 20137.41 | 21301.41 | 28634.64 | 26462.37 | 35332.85 | 29744.15 | 43015.19 | 59269.16 | 48900.96 | 34447.27 |
| 25404.05 | 19242.05 | 26372.08 | 28222.32 | 24224.79 | 21234.4  | 31516.16 | 40138.25 | 29286.54 | 48812.34 | 56651.46 | 47656.37 | 34334.07 |
| 22237.9  | 20437.22 | 26878.88 | 34379.23 | 20186.87 | 24035.94 | 26874.8  | 32399.12 | 27761.1  | 39692.28 | 58390.48 | 51635.77 | 34261.59 |
| 28436.9  | 18954.43 | 26511.93 | 36180.78 | 29664.65 | 26645.69 | 39399.51 | 40333.25 | 33281.94 | 49319.6  | 57043.52 | 45886.31 | 34018.84 |
| 24540.13 | 18971.18 | 23181.5  | 21321.5  | 28589.68 | 23091.16 | 36962.46 | 33794.77 | 23215.84 | 40621.83 | 62966.13 | 51764.39 | 37047.43 |
| 28210.28 | 19702.06 | 25275.95 | 30469.99 | 27036.76 | 26120.92 | 34563.02 | 41002.26 | 30709.3  | 49378.94 | 58115.23 | 47672.81 | 34532.39 |
| 23401.5  | 19205.72 | 26728.22 | 27863.02 | 24790.33 | 21518.28 | 32711.59 | 36203.81 | 27003.26 | 43386.2  | 56737.07 | 48257.96 | 34036.09 |
| 21495.21 | 20260.72 | 26785.51 | 34465.41 | 18989.83 | 23286.93 | 25307.83 | 31660.92 | 27240.63 | 38680.78 | 57454.33 | 51133.89 | 33696.07 |
| 23815.99 | 18591.48 | 27985.86 | 52398.14 | 28045.16 | 31308.1  | 36212.83 | 48074.18 | 33747.66 | 56909.37 | 49233.59 | 46460.76 | 29257.21 |
| 24776.06 | 15187.68 | 18164.73 | 31253.46 | 26957.86 | 24442.18 | 36114.91 | 25882.81 | 11343.42 | 33180.42 | 46841.11 | 37069.28 | 29086.66 |
| 25883.11 | 19865.38 | 22972.77 | 18622.62 | 19666.36 | 27957.05 | 24148.05 | 33766.37 | 29403.3  | 42852.74 | 56154.22 | 46917.31 | 32636.15 |
| 26856.68 | 18600.34 | 23346.51 | 32001.04 | 22347.27 | 21826.23 | 28831.05 | 39812.85 | 27543.32 | 48404.11 | 52467.24 | 40944.8  | 32275.97 |
| 21758.45 | 16563.08 | 20210.14 | 17286.81 | 18678.38 | 14594.72 | 25874.33 | 29526.47 | 25507.17 | 34775.1  | 47939.72 | 35422.1  | 27630    |
| 25766.46 | 21067.85 | 27230.28 | 26073.07 | 12784.43 | 20517.74 | 15730.4  | 35949.62 | 30007.92 | 43394.84 | 61030.82 | 50229.74 | 35263.89 |
| 22500.2  | 17864.18 | 26719.63 | 48894.46 | 26720.77 | 29807.44 | 34555.83 | 45335.23 | 32599.54 | 53554.55 | 46833.72 | 44497.74 | 27681.86 |
| 23970.67 | 16198.65 | 23977.72 | 33808.32 | 25832.07 | 22960.56 | 33726.92 | 35067.43 | 25018.37 | 42929.23 | 39789.01 | 35269    | 26218.46 |
| 22592.31 | 18410.75 | 19566.46 | 23981.54 | 17499.39 | 17210.66 | 22267.57 | 28470.7  | 24638.68 | 31630.23 | 55900.66 | 50836.84 | 33605.38 |
| 23660.55 | 17380.16 | 24859.33 | 28122.6  | 16130.36 | 21954.34 | 20211.5  | 34917.94 | 25082.38 | 42545.18 | 42268.43 | 39577.62 | 27643.53 |
| 24664.39 | 17077.59 | 20932.1  | 17821.91 | 14973.74 | 16127.77 | 19422.11 | 38173.22 | 21565.45 | 46775.87 | 45023.5  | 32756.13 | 26646.47 |
| 24271.21 | 20001.16 | 25308.88 | 22943.72 | 10850.16 | 18626.62 | 13295.7  | 33129.64 | 28068.61 | 39986.7  | 58312.9  | 47886.91 | 33408.13 |
| 20628.3  | 15780.27 | 20977.91 | 20198.49 | 19022.97 | 16104.27 | 24514.67 | 32886.38 | 26838.01 | 38843.32 | 49656.7  | 39267.51 | 28848.96 |
| 19903.17 | 16200.33 | 24835.99 | 47921.41 | 25152.29 | 28494.41 | 32540.23 | 42656.44 | 30348.35 | 50359.57 | 41555.01 | 40461.77 | 24578.24 |
| 20916.97 | 14828.42 | 20623.22 | 27735.02 | 16582.4  | 16099.28 | 21671.66 | 37901.62 | 27701.92 | 45964.58 | 43604.18 | 35361.95 | 26322.32 |
| 29494.03 | 17696.54 | 25543.17 | 34873.24 | 26145.49 | 28825    | 33624.44 | 40438.13 | 30977.58 | 50906.94 | 36309.96 | 31584.65 | 22416.74 |
| 18600.39 | 16066.27 | 18160.67 | 12041.71 | 11947.93 | 13551.59 | 14830.98 | 22009.46 | 15386.2  | 26138.41 | 44742.42 | 35341.83 | 26343.24 |
| 25173.45 | 13443.27 | 28132.81 | 35776.28 | 28059.08 | 19471.4  | 38034.23 | 31289.63 | 20352.62 | 38936.93 | 29678.63 | 18370.68 | 20360.09 |
| 23204.52 | 19044.34 | 22855.92 | 17990.54 | 7875.754 | 16125.34 | 9582.655 | 30045.29 | 25725.84 | 36342.76 | 54547.9  | 44262.28 | 30207.57 |
| 23204.52 | 19044.34 | 22855.92 | 17990.54 | 7875.754 | 16125.34 | 9582.655 | 30045.29 | 25725.84 | 36342.76 | 54547.9  | 44262.28 | 30207.57 |

|          |          |          |          |          |          |          |          |          |          |          |          |          |
|----------|----------|----------|----------|----------|----------|----------|----------|----------|----------|----------|----------|----------|
| 19924.67 | 17748.72 | 24490.43 | 27617    | 17708.44 | 15212.12 | 21781.98 | 31379.42 | 26914.12 | 36302.96 | 40296.6  | 34911.79 | 23224.49 |
| 19594.96 | 17427.7  | 18064.17 | 17432.24 | 12099.3  | 14769.54 | 15977.39 | 25868.27 | 21824.03 | 29013.82 | 40026.25 | 30685.9  | 22874.61 |
| 21079.79 | 12813.14 | 13408.39 | 4409.441 | 11056.71 | 13302.87 | 14222.46 | 29804.4  | 23982.04 | 33036.18 | 33258.77 | 19753.21 | 18336.45 |
| 19541.83 | 17739.93 | 25085.58 | 26904.13 | 16881.01 | 14392.23 | 20658.55 | 31370.39 | 26843.35 | 36194.35 | 38664.54 | 33462.43 | 22206.68 |
| 21855.75 | 14528.76 | 19472.91 | 36471.15 | 19586.76 | 21359.04 | 25336.49 | 30922.11 | 20368.81 | 37036.52 | 24539.41 | 34259.15 | 15481.79 |
| 23169.64 | 14038.4  | 19836.18 | 44536.16 | 23489.74 | 17812.73 | 31338.68 | 31762.42 | 21219.34 | 40086.61 | 28527.58 | 22632.95 | 17845.35 |
| 16774.06 | 12492.98 | 18784.09 | 21131.66 | 17528.45 | 12442.35 | 22687.28 | 22714.58 | 13813.01 | 28261.99 | 27914.82 | 27273.9  | 17377.12 |
| 16586.21 | 8292.721 | 10137.51 | 10944.47 | 14609.81 | 14901.33 | 19324.73 | 34887.08 | 22962.14 | 41269.21 | 28180.35 | 12636.83 | 16005.83 |
| 15491.12 | 12946.72 | 16012.38 | 8497.002 | 10829.27 | 11477.13 | 14458.14 | 20957.43 | 21463.94 | 23448.66 | 40671.91 | 34705.78 | 24171.34 |
| 19596.43 | 19591.93 | 33243.92 | 29047.62 | 21751.47 | 19702.34 | 29620.24 | 26662.87 | 17544.76 | 35134.33 | 19068.88 | 24565.95 | 14761.25 |
| 20212.25 | 10641.38 | 20270.54 | 35048.41 | 26236.53 | 20006.8  | 34097.92 | 28044.52 | 15545.37 | 34790.86 | 19330.17 | 16875.97 | 14793.81 |
| 21614.26 | 12015.26 | 17842.73 | 32986.19 | 14287.98 | 15806.54 | 17187.65 | 31692.43 | 26678.07 | 39583.92 | 16720.59 | 30327.62 | 10631.98 |
| 14754.66 | 12561.96 | 13847.82 | 5214.051 | 8194.251 | 8023.334 | 10973.37 | 18468.65 | 17960.67 | 20830.35 | 37238.08 | 30157.37 | 21914.88 |
| 20232.92 | 14705.26 | 19186.52 | 11642.96 | 6279.26  | 12261.43 | 8588.246 | 22521.83 | 9697.29  | 25895.37 | 34416.85 | 18578.36 | 17243.2  |
| 20982.42 | 11979.9  | 17481.38 | 30921.81 | 13312.77 | 14855.97 | 16139.27 | 31244.49 | 26635.44 | 38500.33 | 16724.47 | 29991.23 | 10630.22 |
| 19641.89 | 10085.53 | 10381.42 | 7218.354 | 5284.132 | 8666.96  | 7277.02  | 25137.69 | 18913.25 | 29633.48 | 26607.88 | 17935.38 | 18059.89 |
| 16963.89 | 10786.09 | 18130.81 | 25882.71 | 18305.07 | 11705.86 | 24489.4  | 19526.12 | 10722.7  | 24880.04 | 21682.43 | 22300.12 | 13865.26 |
| 19420.12 | 7306.342 | 17733.35 | 20794.39 | 23550.88 | 19843.16 | 30804.86 | 27814.85 | 15258.35 | 34192.58 | 18710.28 | 15277.63 | 14153.83 |
| 18048.69 | 10141.56 | 18279.13 | 14971.49 | 16277.54 | 15708.32 | 20578.38 | 24391.98 | 15506.74 | 29019.27 | 21093.27 | 16757.03 | 15363.41 |
| 20024.27 | 9398.013 | 19236.71 | 32552.94 | 26563.75 | 19595.03 | 34534.56 | 29136.26 | 15267.75 | 36074.84 | 17993.33 | 10034.96 | 13850.73 |
| 22303.38 | 22729.11 | 21076.41 | 17118.78 | 13796.63 | 11746.83 | 20326.97 | 27755.29 | 69004.72 | 25318.01 | 40439.82 | 33956.46 | 22669.66 |
| 11513.58 | 9996.87  | 15906.06 | 16030.48 | 14896.83 | 15041.77 | 19813.15 | 24703.89 | 13135.64 | 30223.21 | 25583.7  | 22416.25 | 15642.2  |
| 19734.54 | 12793.14 | 17918.33 | 20389.59 | 9687.673 | 16027.37 | 11864.97 | 24235.22 | 17247.88 | 30176.97 | 21242.75 | 30355.06 | 15177.06 |
| 10167.39 | 9290.766 | 16763.79 | 16725.33 | 10451.88 | 8564.078 | 15804.64 | 18224.08 | 8844.576 | 22440.6  | 21448.45 | 17494.49 | 13235.49 |
| 19485.4  | 10200.88 | 13415.2  | 29659.38 | 14048.36 | 13989.06 | 17506.03 | 27815.23 | 23636.79 | 33928.19 | 16893.67 | 20889.9  | 10981.2  |
| 12850.19 | 11550.18 | 15207.24 | 11971.85 | 12244.51 | 18808.53 | 16578.54 | 27414.99 | 20787.91 | 33000.74 | 34989.06 | 30845.41 | 21065.88 |
| 18846.67 | 8575.56  | 8082.525 | 5122.511 | 9427.423 | 8259.906 | 11256.09 | 22010.43 | 9859.35  | 25786.3  | 21927.85 | 13565.9  | 15233.81 |
| 31169.89 | 15349.27 | 24099.96 | 30122.2  | 19555.68 | 25744.64 | 25660.37 | 39748.13 | 27818.16 | 50206.18 | 24472.9  | 21146.14 | 15403.72 |
| 18852.32 | 8323.221 | 17820.95 | 29045.6  | 20413.74 | 14022.19 | 26899.11 | 25699.48 | 15571.08 | 32577.39 | 15976.63 | 12013    | 11718.11 |
| 20724.9  | 11203.48 | 15412.26 | 26097.17 | 12816.71 | 15552.83 | 16640.04 | 29937.51 | 24401.68 | 36209.3  | 23329.6  | 17198.39 | 14403.18 |
| 11583.84 | 7598.555 | 8265.453 | 13085.67 | 7731.529 | 9053.663 | 10166.46 | 28688.59 | 18713.63 | 32438.42 | 20314.63 | 21221.36 | 10435.06 |
| 16117.77 | 11559.54 | 12022.51 | 5595.013 | 7257.556 | 8757.572 | 9174.359 | 21004.9  | 12607.9  | 24325.48 | 14558.02 | 12788.45 | 10276.25 |
| 10985.8  | 11309.97 | 14959.93 | 8827.634 | 10783.84 | 18033.88 | 14447.32 | 23778.75 | 19345.31 | 28344.04 | 35206.66 | 29935.5  | 21708.33 |
| 22637.83 | 13270.87 | 18737.35 | 26909.07 | 11161.67 | 16966.5  | 15305.36 | 31952.79 | 26846.03 | 38512.77 | 24908.39 | 20749.84 | 15002.02 |
| 16618.36 | 5348.709 | 6071.283 | 7816.488 | 10924.62 | 11376.65 | 15052.36 | 28297.67 | 17370.82 | 31940.87 | 16485.52 | 7732.581 | 9850.642 |

|          |          |          |          |          |          |          |          |          |          |          |          |          |
|----------|----------|----------|----------|----------|----------|----------|----------|----------|----------|----------|----------|----------|
| 16618.36 | 5348.474 | 6071.249 | 7815.815 | 10924.62 | 11372.77 | 15052.36 | 28297.67 | 17370.82 | 31940.87 | 16485.52 | 7731.861 | 9850.642 |
| 16026.71 | 12740.23 | 11499.08 | 6444.948 | 4571.245 | 9756.623 | 6538.835 | 19693.52 | 6983.825 | 22224.54 | 27244.02 | 16111.18 | 14306.76 |
| 17172.44 | 9788.211 | 9496.011 | 37461.62 | 19333.89 | 16370.42 | 23824.69 | 26777.96 | 14651.39 | 31946.27 | 13812.3  | 22940.76 | 8257.467 |
| 28849.95 | 13483.08 | 21712.61 | 28420.39 | 16662.14 | 23900.03 | 21981.82 | 40663.62 | 29931.47 | 50572.42 | 20273.75 | 17187.61 | 12482.32 |
| 15259.67 | 8808.948 | 8500.28  | 5455.725 | 4478.727 | 2291.081 | 6175.362 | 16418.58 | 14108.55 | 17179.03 | 19113.63 | 15744.01 | 14267.72 |
| 11169.2  | 2173.069 | 1967.579 | 3283.205 | 7728.735 | 9714.041 | 10138.78 | 15917.13 | 8565.105 | 20419.23 | 17220.86 | 18307.12 | 12147.46 |
| 11169.2  | 2173.069 | 1967.579 | 3283.205 | 7728.735 | 9714.041 | 10138.78 | 15917.13 | 8565.105 | 20419.23 | 17220.86 | 18307.12 | 12147.46 |
| 15806.51 | 9974.439 | 11002.57 | 8570.222 | 8403.304 | 6991.834 | 10852.13 | 19801.08 | 15149.69 | 20001.03 | 19346.46 | 10766.52 | 9301.216 |
| 10802.39 | 13440.34 | 11743.77 | 7311.639 | 5343.157 | 7137.278 | 6773.462 | 10786.22 | 21327.36 | 9631.269 | 24408.59 | 18979.33 | 14826.48 |
| 14435.74 | 8812.779 | 16878.99 | 19936.88 | 15493.22 | 11980.41 | 20784.55 | 21876.78 | 13140.34 | 28280.41 | 15125.32 | 8017.666 | 11066.68 |
| 10897.35 | 14912.15 | 21554.43 | 21565.16 | 5241.262 | 6500.383 | 6844.509 | 16221.3  | 20535.46 | 19914.95 | 31112.91 | 26563.85 | 16932.95 |
| 25323.18 | 10296.57 | 21326.87 | 44153.64 | 21469.81 | 23359.73 | 27772.4  | 50093.32 | 31035    | 61998.13 | 27353.36 | 34058.18 | 16760.49 |
| 21745.23 | 11122.76 | 17804.09 | 30031    | 16507.4  | 12738.13 | 21256.42 | 24028.72 | 15205.37 | 31419.25 | 20280.61 | 20450.12 | 12453.46 |
| 13209.95 | 10526.7  | 11506.91 | 6013.242 | 3988.535 | 7088.885 | 4838.142 | 17303.26 | 9320.918 | 19600.36 | 20200.09 | 12214.75 | 10342.11 |
| 15724.13 | 8226.933 | 12348.15 | 8724.02  | 8754.06  | 10616.21 | 11062.44 | 22699    | 15370.58 | 27777.63 | 15172.98 | 15796.17 | 7943.801 |
| 4991.6   | 5427.74  | 9913.872 | 10608.29 | 10528.35 | 7729.131 | 14618.53 | 13571.09 | 6985.226 | 17597.03 | 15585.32 | 14130.36 | 9165.086 |
| 3208.027 | 973.3552 | 1816.011 | 3039.393 | 7072.931 | 3533.585 | 9786.996 | 5727.394 | 1893.005 | 6486.995 | 5611.256 | 6945.896 | 4210.742 |
| 11089.79 | 5569.065 | 11597.29 | 5859.157 | 8059.768 | 6826.647 | 11022.19 | 32549.06 | 15590.19 | 29073.35 | 11957.61 | 8556.551 | 8432.525 |
| 21379.9  | 5846.141 | 6140.398 | 11270.14 | 9590.57  | 16688.85 | 11663.38 | 31020.3  | 19124.5  | 36875.79 | 21813.24 | 14914.26 | 11893.18 |
| 24248.41 | 5719.526 | 6016.828 | 13555.37 | 11053.24 | 21899.82 | 13204.02 | 33530.04 | 19697.24 | 41749.56 | 21524.59 | 14657.41 | 11752.72 |
| 17622.63 | 10107.43 | 13728.18 | 18909.93 | 12020.41 | 12110.41 | 14511.86 | 28124.31 | 22253.78 | 32833.16 | 15895.03 | 17761.65 | 9183.642 |
| 21933.01 | 5254.788 | 5482.52  | 10994.12 | 9395.535 | 16799.91 | 11410.7  | 31039.66 | 18058.16 | 37382.24 | 20107.61 | 13478.7  | 10887.44 |
| 14692.51 | 8773.756 | 9928.277 | 25347.77 | 7983.167 | 6713.876 | 10183.01 | 17696.41 | 13002.18 | 18812.53 | 14251.84 | 9445.324 | 7424.536 |
| 12353.56 | 6948.56  | 13828.63 | 14876.78 | 14229.37 | 8073.761 | 19284.01 | 19502.34 | 11273    | 27276.49 | 10391.61 | 9710.506 | 7449.577 |
| 23690.03 | 5189.489 | 5435.725 | 12995.92 | 10373.75 | 19857.21 | 12366.07 | 33168.5  | 18667.61 | 41185.66 | 19760.52 | 13353.64 | 10754.71 |
| 20472.8  | 11524.76 | 18182.78 | 18770.84 | 15702.1  | 15228.53 | 18822.73 | 27584.24 | 22756.09 | 33975.53 | 21114.34 | 20219.24 | 12150.96 |
| 11234.69 | 6106.14  | 5614.896 | 32783.31 | 15699.66 | 11817.66 | 18553.89 | 20618.56 | 9854.821 | 24939.61 | 7770.963 | 15855.78 | 4660.393 |
| 9598.122 | 7193.646 | 11300.71 | 4470.136 | 6801.313 | 8235.381 | 8737.893 | 17998.13 | 10718.86 | 21686.3  | 14019.53 | 10320.47 | 7246.845 |
| 16197.13 | 15225.89 | 22541.54 | 26916    | 14459.13 | 20899.81 | 17644.36 | 25264.91 | 19837.94 | 29969.05 | 11593.77 | 12764.86 | 6716.888 |
| 7639.509 | 1866.999 | 1861.523 | 2624.539 | 7421.664 | 9039.627 | 9789.969 | 15712.84 | 7281.905 | 19260.14 | 6875.576 | 16575.48 | 4589.046 |
| 22053.18 | 8817.791 | 14620.62 | 25705.14 | 14973.17 | 11010.08 | 19421.5  | 22932.64 | 11625.49 | 31667.01 | 8365.322 | 12095.34 | 4845.04  |
| 16217.46 | 5203.336 | 7650.338 | 29505.89 | 15818.63 | 11447.24 | 19337.92 | 14751.31 | 7424.88  | 19934.32 | 10537.94 | 8687.603 | 7403.331 |
| 16217.46 | 5203.336 | 7650.338 | 29505.89 | 15818.63 | 11447.24 | 19337.92 | 14751.31 | 7424.88  | 19934.32 | 10537.94 | 8687.603 | 7403.331 |
| 23525.57 | 4605.287 | 4814.937 | 12538.29 | 9272.459 | 18022.13 | 11163.07 | 31801.58 | 16946.82 | 39033.1  | 17918.14 | 11848.42 | 9666.423 |
| 22984.33 | 4618.784 | 4815.607 | 12318.08 | 9587.868 | 18732.29 | 11401.34 | 32698.41 | 17451.3  | 40457.07 | 17813.91 | 11937.82 | 9660.869 |

|          |          |          |          |          |          |          |          |          |          |          |          |          |
|----------|----------|----------|----------|----------|----------|----------|----------|----------|----------|----------|----------|----------|
| 10790.19 | 2739.712 | 2387.294 | 12449.92 | 7783.47  | 7630.956 | 9111.788 | 16533.27 | 8488.735 | 20553.4  | 5856.777 | 9481.856 | 3523.839 |
| 23102.37 | 4602.25  | 4796.272 | 12021.88 | 9478.257 | 18764.6  | 11241.13 | 32146.04 | 17412.2  | 39966.47 | 17795.89 | 11902.94 | 9643.087 |
| 9658.778 | 7992.961 | 5705.05  | 2871.718 | 2167.166 | 5104.881 | 3121.673 | 12883.07 | 4421.331 | 14599.99 | 14600.47 | 8625.912 | 7531.654 |
| 13431.26 | 5822.646 | 5326.889 | 31860.5  | 9544.507 | 10830.33 | 11640.3  | 21144.28 | 15098.74 | 28022.07 | 6925.159 | 14829.33 | 4790.125 |
| 11716.06 | 7371.377 | 10103.19 | 29537.97 | 8447.274 | 8542.225 | 11195.95 | 16057.15 | 12603.59 | 21700.26 | 11395.31 | 10539.24 | 6242.293 |
| 911.0482 | 301.1558 | 627.9116 | 44.80719 | 6212.162 | 6703.966 | 8876.223 | 6479.754 | 383.2488 | 8086.213 | 6398.411 | 6669.574 | 4798.538 |
| 6262.641 | 5523.2   | 11196.36 | 18104.42 | 7917.315 | 6001.626 | 10464.72 | 10553.29 | 6313.246 | 13617.8  | 6578.093 | 9347.165 | 4777.613 |
| 4153.45  | 5871.948 | 10646.79 | 5601.481 | 5156.998 | 4306.756 | 6935.382 | 14526.07 | 7105.931 | 17739.46 | 9589.722 | 7491.78  | 5269.8   |
| 10182.56 | 1898.897 | 2982.966 | 2487.601 | 5149.069 | 8234.315 | 6258.697 | 19290.52 | 10417.13 | 21385.28 | 7320.211 | 4580.008 | 4043.742 |
| 10321.57 | 8229.366 | 12529.21 | 14778.17 | 6833.518 | 10081.11 | 8307.627 | 13832.92 | 7283.388 | 16366.83 | 7711.95  | 12305.84 | 6612.532 |
| 11723.3  | 9031.361 | 12084.76 | 34718.05 | 8532.582 | 13476.26 | 10963.34 | 14543.21 | 9979.257 | 17968.39 | 4581.453 | 10905.03 | 3303.514 |
| 8232.693 | 10080.2  | 13579.77 | 20927.4  | 9552.501 | 11708.49 | 11670.54 | 22034.32 | 15956.71 | 26549.94 | 13548.51 | 12256.74 | 8121.585 |
| 13121.12 | 5546.1   | 13084.56 | 6856.343 | 7308.644 | 13195.34 | 8852.025 | 30701.54 | 18926.51 | 36823.02 | 14161.66 | 9615.425 | 6866.755 |
| 3828.57  | 6637.978 | 12986.89 | 6061.373 | 4027.05  | 6157.586 | 5360.048 | 12561.09 | 10088.89 | 15892.23 | 11974.48 | 7414.807 | 8827.404 |
| 14989.92 | 5760.135 | 5384.875 | 10246.97 | 8747.573 | 11732.2  | 12196.28 | 32132.4  | 19457.63 | 39531.34 | 12149.29 | 13242.48 | 2107.873 |
| 12101.87 | 744.1028 | 1226.548 | 3126.502 | 4717.862 | 6756.893 | 5265.087 | 16726.22 | 8793.472 | 19998.43 | 8819.402 | 8105.181 | 3853.316 |
| 9938.204 | 386.838  | 203.6716 | 0        | 604.7525 | 761.431  | 606.1861 | 3180.329 | 3593.378 | 4684.698 | 7921.097 | 7974.76  | 3833.196 |
| 7236.945 | 9677.133 | 15271.44 | 22696.29 | 8192.822 | 10339.76 | 10164.1  | 19882.62 | 14423.52 | 23642.18 | 13801.5  | 10475.69 | 8090.096 |
| 10503.41 | 730.3265 | 1215.3   | 2857.921 | 4662.992 | 6317.707 | 5223.256 | 11382.02 | 3214.595 | 15777.72 | 7398.078 | 5882.686 | 3530.014 |
| 9073.545 | 2567.141 | 3456.778 | 20049.98 | 2673.793 | 5359.272 | 2858.127 | 2908.809 | 6368.896 | 3884.033 | 7090.684 | 9063.878 | 3075.947 |
| 3078.792 | 5369.643 | 11653.29 | 11409.83 | 2996.197 | 5185.019 | 3990.826 | 9871.9   | 7591.895 | 12709.14 | 9102.809 | 5470.031 | 6941.424 |
| 8543.108 | 2811.498 | 2963.672 | 11622.35 | 5895.93  | 9374.444 | 6953.336 | 20970.62 | 17395.84 | 23925.15 | 13051.44 | 10618.69 | 8418.933 |
| 13233.48 | 4186.883 | 6675.741 | 3257.012 | 4665.642 | 5950.087 | 4696.814 | 19233.07 | 18263.51 | 23368.04 | 8007.554 | 4770.886 | 5786.592 |
| 4895.534 | 4933.525 | 7920.592 | 6825.413 | 4873.372 | 12609.64 | 6603.972 | 28828.6  | 17389.38 | 33042.13 | 6278.267 | 5484.478 | 3071.312 |
| 2611.843 | 12241.55 | 14780.16 | 3829.171 | 6360.075 | 5110.879 | 6785.499 | 25430.27 | 22801.02 | 29276.32 | 33551.66 | 21251.7  | 17354.63 |
| 9584.112 | 2030.527 | 1611.58  | 7519.279 | 6630.248 | 8353.651 | 7272.325 | 15308.43 | 7351.204 | 20289.31 | 2448.271 | 1515.836 | 1466.025 |
| 1004.024 | 736.273  | 1833.156 | 700.8644 | 8884.958 | 12358.77 | 11000.47 | 13242.67 | 602.0762 | 16732.86 | 6975.951 | 1209.13  | 4745.788 |
| 6526.884 | 942.8652 | 1560.195 | 1500.154 | 3108.335 | 5637.963 | 3701.865 | 15680.89 | 8350.028 | 16986.49 | 3741.279 | 2343.965 | 2050.123 |
| 4410.352 | 1760.014 | 1682.624 | 10041.79 | 3316.398 | 4344.977 | 4092.647 | 7893.636 | 3048.922 | 9024.221 | 2852.677 | 10937.73 | 1809.915 |
| 15976.6  | 4034.24  | 5837.682 | 21367.13 | 12660.12 | 12034.81 | 15424.06 | 16018.59 | 7586.223 | 19583.37 | 3127.44  | 6003.006 | 1554.68  |
| 13210.99 | 3461.99  | 2328.255 | 18317.31 | 4833.009 | 7490.58  | 6117.506 | 18473.65 | 8318.191 | 22755.21 | 4936.971 | 10138.23 | 2564.757 |
| 7280.224 | 1761.7   | 2542.765 | 1605.453 | 5002.216 | 7526.68  | 6172.247 | 11556.42 | 8879.937 | 13170.22 | 7269.665 | 6500.92  | 4499.646 |
| 4737.828 | 5862.712 | 1520.276 | 6195.166 | 2865.398 | 4100.125 | 4283.155 | 12265.31 | 2821.811 | 13948.72 | 3491.813 | 7963.075 | 2987.038 |
| 12524.98 | 892.8695 | 1291.503 | 2417.857 | 3194.192 | 2896.398 | 4374.128 | 11201.15 | 5663.52  | 13087.4  | 4481.871 | 2387.706 | 3448.412 |
| 16644.4  | 1734.035 | 3683.159 | 3673.611 | 11168.52 | 14728.8  | 13034.25 | 30986.25 | 13544.27 | 40320.34 | 5403.895 | 4410.501 | 3926.642 |

|          |          |          |          |          |          |          |          |          |          |          |          |          |
|----------|----------|----------|----------|----------|----------|----------|----------|----------|----------|----------|----------|----------|
| 9720.531 | 2921.732 | 2355.092 | 17927.34 | 4159.077 | 5503.679 | 5277.185 | 11157.79 | 5659.462 | 13932.4  | 3203.204 | 6756.261 | 1790.872 |
| 2491.827 | 2388.376 | 5182.218 | 4553.996 | 3453.299 | 2593.677 | 4453.905 | 11213.51 | 8870.495 | 13119.8  | 5350.752 | 3917.209 | 2961.476 |
| 10045.82 | 4491.837 | 6054.263 | 12418.55 | 5628.791 | 6737.99  | 6894.61  | 8893.007 | 8208.344 | 12075.41 | 3471.889 | 9338.368 | 2469.439 |
| 4532.493 | 3788.994 | 8585.778 | 5025.039 | 3268.923 | 5396.387 | 5152.416 | 71.86118 | 178.2206 | 152.5889 | 4183.382 | 1283.921 | 3791.632 |
| 3950.426 | 5919.055 | 12308.59 | 12263.09 | 4758.029 | 6884.943 | 5390.426 | 11633.71 | 9080.028 | 14889.28 | 10374.44 | 6181.985 | 7680.97  |
| 13730.93 | 2625.355 | 3082.588 | 26414.89 | 6514.398 | 9708.492 | 7496.663 | 22316.37 | 14105.6  | 27703.84 | 3399.782 | 2993.471 | 1169.507 |
| 588.3252 | 333.8321 | 811.1001 | 2513.158 | 2908.845 | 5361.377 | 4281.265 | 4318.949 | 720.9348 | 6495.979 | 1155.268 | 383.3094 | 1132.395 |
| 12332.1  | 2844.807 | 2315.276 | 19185.39 | 4851.086 | 7614.833 | 6183.019 | 24930.77 | 16492.89 | 30355.71 | 2930.559 | 3467.297 | 738.4552 |
| 2824.775 | 1961.333 | 3889.672 | 1848.196 | 2859.196 | 2980.571 | 3916.802 | 5732.036 | 3783.346 | 7899.327 | 2451.678 | 2290.197 | 2271.183 |
| 5921.724 | 869.5732 | 923.6004 | 16772.06 | 3800.859 | 3151.027 | 5245.804 | 8724.574 | 4858.347 | 10539.03 | 639.86   | 723.6092 | 127.1143 |
| 3584.494 | 5413.891 | 11720.11 | 10481.06 | 4800.943 | 7827.978 | 5858.444 | 10234.01 | 7291.898 | 12839.89 | 9157.645 | 5508.126 | 7007.924 |
| 12732.58 | 2523.018 | 4083.092 | 10214.31 | 7173.398 | 10481.25 | 8747.664 | 24405.38 | 15640.03 | 29815.79 | 6837.884 | 7117.621 | 3070.361 |
| 12103.39 | 4393.422 | 2576.695 | 12460    | 6186.586 | 8790.875 | 8031.218 | 18169.05 | 11496.2  | 23527.66 | 3488.659 | 5353.895 | 2894.575 |
| 3091.744 | 1421.909 | 2137.895 | 2702.072 | 2602.009 | 4422.613 | 3288.402 | 10020.35 | 6201.301 | 14003.61 | 4062.253 | 1646.872 | 2890.966 |
| 2547.148 | 4777.719 | 11559.92 | 5877.208 | 2694.726 | 8654.102 | 3727.476 | 28381.12 | 17243.21 | 33987.91 | 3220.774 | 2890.817 | 1565.483 |
| 2456.027 | 2378.375 | 3616.616 | 5455.796 | 2708.433 | 8112.27  | 3654.24  | 18908.85 | 10306.5  | 20690.67 | 3460.017 | 2987.605 | 1674.981 |
| 621.7413 | 375.9042 | 744.3161 | 441.4427 | 9848.785 | 15409.16 | 11875.36 | 7431.157 | 378.0861 | 9317.107 | 3088.436 | 501.8796 | 2300.387 |
| 3201.815 | 1937.275 | 2113.833 | 1136.249 | 3608.206 | 4239.169 | 4748.283 | 7912.855 | 4967.196 | 9533.301 | 4729.054 | 4346.862 | 2470.514 |
| 12714.64 | 2219.645 | 3415.178 | 8686.295 | 10459.65 | 9284.269 | 12165.13 | 22495.93 | 11020.72 | 27339.61 | 14020.36 | 1999.182 | 9110.889 |
| 444.1525 | 251.4884 | 612.5877 | 1912.131 | 2271.904 | 4299.946 | 3376.291 | 3442.599 | 551.9469 | 5201.623 | 883.4017 | 289.7494 | 874.192  |
| 14242.66 | 1968.222 | 2101.091 | 2686.975 | 9024.58  | 11480.9  | 11017.54 | 22403.3  | 12467.76 | 25921.37 | 5231.461 | 2064.921 | 4157.803 |
| 8234.077 | 1023.021 | 1000.872 | 8894.293 | 5783.496 | 6959.693 | 6785.176 | 8881.907 | 4624.096 | 12308.55 | 754.2617 | 6719.668 | 468.1397 |
| 8211.284 | 1024.484 | 998.7601 | 8179.779 | 5621.057 | 7240.272 | 6517.404 | 8280.635 | 4294.625 | 11193.72 | 767.4915 | 6673.86  | 573.0315 |
| 1533.558 | 2018.329 | 1291.375 | 2430.472 | 1457.858 | 534.5011 | 2073.124 | 2492.705 | 1093.495 | 2489.521 | 1362.488 | 6007.637 | 1645.105 |
| 15793.47 | 3199.987 | 4663.02  | 7095.104 | 9318.012 | 10826.53 | 10620.65 | 20638.94 | 12304.59 | 25666.51 | 5966.108 | 5664.926 | 2288.758 |
| 11636.43 | 1582.807 | 1797.377 | 1602.841 | 6929.368 | 10189.54 | 8159.13  | 17393.65 | 10220.81 | 19226.66 | 4673.145 | 4683.29  | 3707.976 |
| 6008.707 | 939.253  | 586.1852 | 15214.14 | 7369.278 | 5663.9   | 9259.296 | 1272.776 | 457.166  | 1592.347 | 1571.162 | 2663.587 | 1614.408 |
| 4255.747 | 752.334  | 1407.426 | 459.8683 | 2408.886 | 2985.13  | 2724.411 | 6417.76  | 2926.168 | 7462.387 | 602.2981 | 4018.325 | 534.1836 |
| 8077.018 | 2168.464 | 2684.733 | 3180.683 | 4854.023 | 9649.693 | 5556.848 | 24710.31 | 14338.8  | 29446.85 | 3873.332 | 2183.547 | 1599.882 |
| 2577.711 | 1135.79  | 1089.876 | 1109.712 | 2289.528 | 3722.529 | 2134.221 | 3825.47  | 1659.615 | 4636.099 | 779.8986 | 454.8153 | 421.4619 |
| 4539.716 | 329.9428 | 1405.619 | 896.534  | 2980.495 | 4686.679 | 3724.906 | 8119.048 | 6477.376 | 8989.614 | 2121.464 | 1843.221 | 1753.784 |
| 7251.674 | 1033.284 | 1013.188 | 12334.74 | 3478.18  | 3901.36  | 4609.484 | 9123.494 | 4544.384 | 11318.3  | 720.232  | 924.9701 | 170.0277 |
| 11349.49 | 5555.06  | 3764.896 | 3427.619 | 4970.561 | 6367.712 | 5918.738 | 18743.55 | 10992.79 | 22365.09 | 5549.787 | 12336.22 | 2677.049 |
| 15629.12 | 2952.001 | 2919.259 | 25943.33 | 6036.842 | 10732.1  | 6927.927 | 16521.77 | 5680.823 | 21111.24 | 1679.145 | 3566.236 | 451.7151 |
| 6294.911 | 2102.507 | 1655.672 | 3500.001 | 2618.8   | 4368.803 | 2680.293 | 9108.793 | 5710.171 | 10860.55 | 1077.598 | 3936.574 | 306.4078 |



|          |          |          |          |          |          |          |          |          |          |          |          |          |
|----------|----------|----------|----------|----------|----------|----------|----------|----------|----------|----------|----------|----------|
| 8591.872 | 5284.091 | 3755.652 | 3491.256 | 4192.986 | 5113.16  | 4998.36  | 14179.49 | 8044.669 | 16505.91 | 5373.276 | 11662.14 | 2632.756 |
| 10855.18 | 5148.288 | 3448.249 | 3179.779 | 4570.972 | 5942.166 | 5443.686 | 17769.16 | 10241.87 | 21245.89 | 4943.174 | 11470.68 | 2380.264 |
| 10855.18 | 5148.288 | 3448.249 | 3179.779 | 4570.972 | 5942.166 | 5443.686 | 17769.16 | 10241.87 | 21245.89 | 4943.174 | 11470.68 | 2380.264 |
| 10855.18 | 5148.288 | 3448.249 | 3179.779 | 4570.972 | 5942.166 | 5443.686 | 17769.16 | 10241.87 | 21245.89 | 4943.174 | 11470.68 | 2380.264 |
| 643.4586 | 4305.373 | 7594.234 | 10087.52 | 16.01071 | 32.87965 | 7.005946 | 2888.813 | 265.5074 | 5841.792 | 132.2894 | 264.3248 | 84.99483 |
| 15595.7  | 409.5117 | 686.6426 | 153.6961 | 8092.62  | 9693.203 | 10082.9  | 5811.246 | 934.2023 | 9720.247 | 138.0695 | 661.1477 | 109.7039 |
| 12070.66 | 2421.426 | 2467.053 | 10603.67 | 5604.059 | 8825.434 | 6405.515 | 13442.2  | 5511.061 | 17569.55 | 1404.064 | 3056.524 | 377.4167 |
| 5245.084 | 1387.345 | 1398.068 | 2076.618 | 3909.714 | 4852.356 | 4934.718 | 8322.059 | 4952.531 | 10942.89 | 1694.01  | 3111.731 | 754.0377 |
| 8591.872 | 755.4786 | 1690.759 | 1517.156 | 3924.217 | 5113.16  | 4186.473 | 14179.49 | 8044.669 | 16505.91 | 2682.506 | 10515.94 | 1716.567 |
| 9474.38  | 1774.776 | 2127.492 | 5665.811 | 4942.024 | 8108.266 | 6183.161 | 20468.1  | 13806.07 | 25395.36 | 3276.468 | 3700.557 | 1233.111 |
| 494.4665 | 963.1797 | 852.6815 | 1586.22  | 581.4117 | 193.1532 | 763.6386 | 184.9496 | 662.7618 | 221.6719 | 494.1705 | 1200.497 | 544.7624 |
| 545.7106 | 288.5566 | 718.7876 | 444.8474 | 276.4781 | 4764.226 | 335.0262 | 12748.5  | 433.5619 | 16866.75 | 1699.546 | 129.881  | 1139.957 |
| 895.0491 | 97.62348 | 0        | 1630.645 | 1399.891 | 392.9192 | 1661.331 | 889.8152 | 639.2029 | 1173.812 | 410.1289 | 588.6384 | 423.3128 |
| 9812.53  | 4159.953 | 2638.159 | 2412.477 | 3615.902 | 4761.369 | 4265.919 | 15077.17 | 8548.012 | 18232.84 | 3849.419 | 9076.919 | 1845.664 |
| 14012.38 | 2709.906 | 3191.734 | 7521.062 | 10735.75 | 12530.9  | 13814.93 | 18525.07 | 15372.77 | 25634.93 | 3749.525 | 3680.214 | 903.0226 |
| 8051.721 | 2836.248 | 3019.231 | 6529.958 | 10765.85 | 9591.557 | 14499.52 | 10099.18 | 7216.588 | 12218.19 | 2357.235 | 8670.782 | 1884.588 |
| 8297.828 | 843.4973 | 1650.977 | 2525.939 | 3640.801 | 5678.547 | 4559.378 | 18371.05 | 9041.998 | 22563.98 | 2742.063 | 2895.743 | 1011.592 |
| 6928.585 | 3933.381 | 2631.351 | 2459.813 | 3007.341 | 3733.839 | 3557.679 | 10859.59 | 5988.308 | 12713.94 | 3722.202 | 8532.587 | 1814.102 |
| 13503.86 | 2624.592 | 2680.775 | 4253.428 | 5791.63  | 7425.548 | 6401.869 | 16357.15 | 10257.41 | 20478.65 | 3546.727 | 3472.388 | 1244.533 |
| 0        | 3264.255 | 2205.054 | 146.2653 | 723.5776 | 454.407  | 909.4951 | 4196.495 | 0        | 4114.351 | 2181.483 | 1097.61  | 1653.599 |
| 737.4388 | 759.2243 | 888.3617 | 26725.71 | 0        | 0        | 0        | 0        | 0        | 0        | 141.1178 | 62.57131 | 110.6763 |
| 14838.67 | 2262.193 | 2665.223 | 6318.979 | 10904.2  | 13299.58 | 13124.62 | 22272.93 | 10031.97 | 29557.41 | 3071.627 | 2938.748 | 735.5238 |
| 4055.175 | 2000.173 | 1628.117 | 3405.374 | 1842.505 | 4052.35  | 2050.986 | 7752.738 | 5062.277 | 9671.597 | 920.8962 | 3496.224 | 282.5147 |
| 33.9839  | 794.5047 | 1296.085 | 1782.816 | 197.066  | 388.543  | 244.9779 | 16755.73 | 11023.11 | 19363.92 | 2103.379 | 1133.879 | 320.9016 |
| 7197.57  | 681.4112 | 1402.987 | 3673.611 | 3360.309 | 5780.65  | 4181.897 | 18304.04 | 8408.196 | 23046.91 | 2224.247 | 2534.295 | 822.2853 |
| 9563.353 | 1214.493 | 2034.069 | 3064.685 | 5332.147 | 7809.569 | 6985.965 | 16666.02 | 10105.5  | 20199.56 | 2598.451 | 3984.582 | 1135.281 |
| 8508.461 | 371.6469 | 860.3339 | 338.3621 | 4342.59  | 5428.432 | 5734.411 | 3208.799 | 267.4883 | 4489.218 | 445.0735 | 767.2111 | 412.1081 |
| 576.6844 | 2668.611 | 1598.787 | 0        | 32.20179 | 1002.709 | 63.84865 | 2595.103 | 8370.039 | 2071.157 | 4292.383 | 5166.5   | 2557.012 |
| 9626.062 | 1227.189 | 1236.525 | 4939.523 | 4061.207 | 7754.419 | 4580.292 | 13347.01 | 5951.865 | 17553.28 | 965.9655 | 1390.778 | 287.8579 |
| 5054.865 | 1048.817 | 1201.857 | 3021.884 | 2380.064 | 5080.759 | 2814.813 | 9482.418 | 6060.017 | 12450.8  | 1327.46  | 1267.493 | 415.4652 |
| 2220.103 | 465.1086 | 1134.468 | 1449.723 | 2030.481 | 1635.953 | 1390.539 | 9998.446 | 5125.249 | 13259.72 | 1611.27  | 1254.51  | 382.7285 |
| 1578.462 | 371.9592 | 791.8856 | 3018.517 | 1155.367 | 1248.138 | 1352.508 | 1384.071 | 3317.839 | 2275.393 | 408.0942 | 469.2339 | 417.0927 |
| 1477.222 | 383.4516 | 836.0337 | 5455.796 | 1139.067 | 1251.495 | 1344.243 | 1398.143 | 3489.531 | 2314.161 | 404.4285 | 465.6127 | 409.4806 |
| 10534.07 | 1320.414 | 1662.575 | 4313.329 | 4271.227 | 4656.204 | 5082.836 | 23081.39 | 10448.05 | 28248.95 | 2126.488 | 1927.043 | 857.621  |
| 1079.126 | 1026.616 | 2396.764 | 1269.947 | 3549.42  | 202.6085 | 4620.557 | 7161.284 | 4784.644 | 7636.455 | 5434.638 | 7286.139 | 3799.827 |

|          |          |          |          |          |          |          |          |          |          |          |          |          |
|----------|----------|----------|----------|----------|----------|----------|----------|----------|----------|----------|----------|----------|
| 3204.107 | 2227.669 | 1537.837 | 2404.517 | 2408.74  | 2224.801 | 4662.404 | 18785.17 | 10276.45 | 22000.55 | 1829.543 | 3322.044 | 215.0567 |
| 839.4605 | 436.3285 | 849.6709 | 21266.46 | 0        | 4297.45  | 0        | 369.6709 | 87.34988 | 446.8196 | 0        | 173.187  | 63.28474 |
| 7814.33  | 434.8497 | 386.1687 | 1070.359 | 2535.078 | 5616.238 | 3210.554 | 7544.208 | 3617.872 | 8713.253 | 421.5818 | 940.7056 | 101.9376 |
| 10826.81 | 1234.475 | 1151.535 | 3339.482 | 5064.76  | 8185.693 | 6233.422 | 13565    | 6578.314 | 16500.83 | 1314.191 | 1784.621 | 383.3047 |
| 4767.844 | 1453.413 | 1376.261 | 1305.332 | 2376.323 | 2048.473 | 2842.239 | 8874.016 | 5166.676 | 10423.87 | 1829.144 | 1538.617 | 710.4856 |
| 10566.49 | 1175.236 | 1092.074 | 3167.815 | 4850.598 | 8045.669 | 5965.144 | 13285.72 | 6419.81  | 16071.72 | 1252.273 | 1699.005 | 363.6295 |
| 11636.43 | 1396.699 | 1235.967 | 1602.841 | 6292.154 | 10189.54 | 7287.016 | 17393.65 | 10220.81 | 19226.66 | 2673.736 | 1238.072 | 580.7649 |
| 8591.872 | 668.3943 | 1690.759 | 1517.156 | 3924.217 | 5113.16  | 4186.473 | 14179.49 | 8044.669 | 16505.91 | 2682.506 | 10515.94 | 814.2857 |
| 8591.872 | 668.3943 | 1690.759 | 1517.156 | 3924.217 | 5113.16  | 4186.473 | 14179.49 | 8044.669 | 16505.91 | 2682.506 | 10515.94 | 814.2857 |
| 3182.812 | 521.7179 | 0        | 112.2693 | 3527.688 | 2426.988 | 4778.414 | 782.9192 | 0        | 1379.651 | 399.475  | 120.3871 | 397.5384 |
| 5327.194 | 3583.875 | 4628.503 | 1500.416 | 3049.571 | 5241.361 | 3693.166 | 23368.75 | 10687.98 | 25001.15 | 1619.452 | 1487.057 | 572.6842 |
| 5327.194 | 3583.875 | 4628.503 | 1500.416 | 3049.571 | 5241.361 | 3693.166 | 23368.75 | 10687.98 | 25001.15 | 1619.452 | 1487.057 | 572.6842 |
| 669.4568 | 374.4639 | 517.136  | 219.8428 | 1133.948 | 1786.884 | 1240.713 | 10036.15 | 4401.527 | 11866.65 | 1263.535 | 1728.637 | 859.75   |
| 0        | 190.9647 | 270.9529 | 558.0348 | 2193.307 | 2657.788 | 2645.626 | 7317.874 | 0        | 6991.135 | 452.8821 | 394.1321 | 147.1596 |
| 4551.778 | 116.7451 | 138.7478 | 296.8251 | 2051.077 | 4709.103 | 2385.206 | 2928.117 | 908.7024 | 3909.691 | 169.533  | 196.0739 | 87.17321 |
| 6282.764 | 2197.543 | 1294.61  | 1162.732 | 1859.372 | 2553.502 | 2179.725 | 9094.301 | 4854.749 | 11187.36 | 1765.364 | 4661.217 | 839.7005 |
| 4086.788 | 523.9952 | 198.65   | 605.3345 | 2129.871 | 3884.134 | 2554.176 | 1919.962 | 1145.368 | 2797.143 | 619.2513 | 1479.398 | 459.441  |
| 11154.74 | 812.9109 | 1339.213 | 3408.569 | 5077.536 | 6826.157 | 5683.666 | 15370.92 | 7920.208 | 18321.01 | 1874.017 | 1462.64  | 383.6489 |
| 337.7104 | 2496.716 | 4005.285 | 1814.69  | 61.25888 | 444.6007 | 44.94534 | 1592.651 | 7653.806 | 1850.142 | 618.4244 | 1264.833 | 471.7359 |
| 4764.647 | 3058.943 | 1023.092 | 6066.498 | 1636.66  | 2294.361 | 2672.597 | 6700.688 | 4400.016 | 8275.282 | 565.9264 | 8703.069 | 428.7757 |
| 1712.225 | 1313.054 | 850.3002 | 1298.463 | 1326.607 | 1172.048 | 2735.33  | 13111.34 | 6887.766 | 14929.9  | 941.9693 | 1909.487 | 107.7033 |
| 6340.248 | 709.818  | 1004.673 | 1857.443 | 3232.423 | 6967.12  | 3574.649 | 16314.57 | 7443.142 | 19662.44 | 1220.764 | 897.2955 | 348.8474 |
| 9872.439 | 1020.141 | 999.1986 | 2701.583 | 4959.137 | 7489.697 | 6263.775 | 11182    | 6605.82  | 14392.32 | 1083.97  | 1857.223 | 267.8482 |
| 16852.91 | 1145.719 | 1291.551 | 3212.103 | 7962.574 | 10738.21 | 9047.747 | 20202.96 | 10097.85 | 25952.58 | 1472.142 | 1452.205 | 338.1761 |
| 8567.992 | 668.6826 | 831.1751 | 1551.576 | 4242.288 | 6974.894 | 4869.385 | 13562.41 | 6735.874 | 16861.45 | 1375.608 | 895.9642 | 302.8471 |
| 6928.585 | 451.5595 | 1152.326 | 1035.645 | 2800.954 | 3733.839 | 2947.413 | 10859.59 | 5988.308 | 12713.94 | 1822.564 | 7620.97  | 548.3668 |
| 4250.701 | 748.568  | 1245.55  | 1103.021 | 2139.416 | 4330.338 | 2697.284 | 9114.456 | 8059.302 | 10041.28 | 804.2619 | 857.3154 | 401.1393 |
| 8106.239 | 730.9223 | 998.034  | 2233.366 | 3983.885 | 4750.817 | 4313.4   | 22733.27 | 9557.918 | 27113.1  | 1269.503 | 1296.873 | 238.4318 |
| 4415.875 | 1517.714 | 932.4366 | 4953.597 | 2341.507 | 2621.469 | 1919.347 | 9571.298 | 5425.27  | 11933.6  | 829.9023 | 2143.279 | 265.5265 |
| 8595.882 | 583.9833 | 723.2564 | 1427.397 | 4155.045 | 6731.456 | 4714.856 | 12445.92 | 6184.483 | 15502.23 | 1219.233 | 798.1462 | 257.7415 |
| 11557.53 | 908.1866 | 718.7427 | 1605.177 | 5226.786 | 8147.774 | 6591.915 | 13300.1  | 6474.715 | 17172.88 | 1285.931 | 2261.786 | 387.3957 |
| 11077.55 | 900.3811 | 717.3994 | 1615.058 | 5260.707 | 7790.808 | 6638.777 | 12753.55 | 6169.091 | 16686.29 | 1264.124 | 2225.47  | 383.991  |
| 4917.943 | 535.139  | 638.1992 | 1455.381 | 1842.505 | 4052.35  | 2050.986 | 7752.738 | 4682.655 | 9671.597 | 683.9752 | 707.437  | 145.2164 |
| 19.87333 | 56.15838 | 80.22298 | 85.75102 | 139.9945 | 1447.717 | 152.9289 | 56.94212 | 15.54408 | 77.06707 | 201.4199 | 51.94957 | 190.403  |
| 9.726826 | 260.6535 | 447.5281 | 577.4254 | 57.2132  | 114.6864 | 71.18207 | 9214.68  | 5699.919 | 10116.38 | 776.9733 | 369.3684 | 102.8952 |

|          |          |          |          |          |          |          |          |          |          |          |          |          |
|----------|----------|----------|----------|----------|----------|----------|----------|----------|----------|----------|----------|----------|
| 3432.219 | 249.1448 | 501.0702 | 708.9735 | 1404.443 | 4584.986 | 1467.934 | 8730.418 | 3573.744 | 11339.53 | 795.2987 | 368.7018 | 250.8128 |
| 0        | 477.624  | 777.7862 | 7.993399 | 1743.847 | 1394.905 | 1922.641 | 504.8102 | 1358.104 | 396.7022 | 238.9052 | 977.7718 | 223.2045 |
| 6697.847 | 648.2779 | 596.6786 | 1209.144 | 3137.328 | 5380.326 | 3579.487 | 11541.04 | 6191.487 | 12719.88 | 1701.382 | 601.4863 | 534.975  |
| 10471.17 | 798.2478 | 631.3814 | 1419.936 | 4757.174 | 7440.234 | 5996.892 | 12071.01 | 5791.933 | 15683.12 | 1127.727 | 1991.789 | 339.3994 |
| 3366.88  | 2126.418 | 689.3094 | 4304.077 | 1109.894 | 1577.113 | 1819.236 | 4714.68  | 3055.291 | 5826.963 | 378.4311 | 6126.755 | 286.8912 |
| 3425.966 | 492.6411 | 575.1642 | 1585.469 | 1413.287 | 1934.808 | 1748.028 | 6005.193 | 3961.497 | 8210.748 | 790.2786 | 616.0531 | 216.6763 |
| 3998.017 | 1343.969 | 748.5719 | 4827.504 | 1827.738 | 2088.546 | 1443.075 | 10373.83 | 5249.228 | 13552.07 | 679.4914 | 1693.131 | 199.8568 |
| 1922.562 | 695.491  | 807.3929 | 1326.925 | 988.8626 | 4430.132 | 1006.657 | 11562.72 | 5198.844 | 14954.47 | 834.6036 | 781.9981 | 176.3068 |
| 2773.549 | 157.8975 | 138.1792 | 38.09425 | 897.8453 | 2259.101 | 1081.961 | 2736.968 | 1312.757 | 2952.692 | 894.3554 | 499.3531 | 501.9521 |
| 102.6061 | 164.9506 | 256.248  | 196.5265 | 109.4786 | 344.2698 | 128.0004 | 2882.664 | 85.59987 | 4299.235 | 534.0897 | 33.55781 | 443.3184 |
| 4872.903 | 1091.284 | 887.2031 | 802.4356 | 1493.06  | 2559.367 | 1806.303 | 5872.182 | 1368.886 | 7586.394 | 709.8913 | 912.8345 | 319.3074 |
| 77.00015 | 152.9195 | 394.6965 | 436.9034 | 706.1259 | 271.6987 | 585.8895 | 152.9385 | 20.70353 | 222.3345 | 442.9707 | 70.71374 | 97.80408 |
| 6341.718 | 487.9026 | 794.0213 | 1400.887 | 2230.01  | 5127.453 | 2470.401 | 11233.47 | 5008.939 | 14865.97 | 2539.171 | 2693.237 | 713.1338 |
| 0        | 0        | 137.0829 | 0        | 719.3115 | 68.92892 | 770.8971 | 182.2053 | 0        | 262.553  | 572.986  | 685.7938 | 360.8327 |
| 5442.108 | 541.4433 | 589.7608 | 1364.29  | 1971.908 | 3905.495 | 2118.98  | 8155.723 | 3917.94  | 10821.97 | 580.2914 | 686.8603 | 175.6649 |
| 154.2445 | 659.6329 | 848.1646 | 1425.772 | 2054.175 | 4876.686 | 2214.729 | 12333.17 | 6192.898 | 16307.57 | 940.3278 | 577.3361 | 202.7794 |
| 4654.68  | 255.2608 | 449.6468 | 1742.714 | 2162.796 | 3318.816 | 2501.983 | 8707.926 | 3555.131 | 10804.1  | 647.1456 | 407.9839 | 140.575  |
| 3639.16  | 341.5445 | 398.796  | 1252.312 | 1662.12  | 4245.202 | 2092.995 | 7341.197 | 3335.941 | 10069.09 | 749.1945 | 450.2763 | 264.2944 |
| 109.5197 | 20.477   | 0        | 78.92794 | 68.98475 | 177.0757 | 259.2224 | 0        | 0        | 0        | 0        | 91.08435 | 0        |
| 109.5197 | 20.477   | 0        | 78.92794 | 68.98475 | 177.0757 | 259.2224 | 0        | 0        | 0        | 0        | 91.08435 | 0        |
| 109.5197 | 20.477   | 0        | 78.92794 | 68.98475 | 177.0757 | 259.2224 | 0        | 0        | 0        | 0        | 91.08435 | 0        |
| 586.498  | 204.0705 | 347.0792 | 1515.964 | 166.6788 | 294.5049 | 242.8463 | 509.8675 | 0        | 826.8126 | 74.48543 | 198.8901 | 139.3213 |
| 8785.653 | 378.5575 | 536.8918 | 1100.723 | 3880.832 | 4740.283 | 4787.254 | 12147.32 | 5833.603 | 11949.25 | 899.6706 | 781.1277 | 293.1226 |
| 992.9767 | 1145.015 | 1629.348 | 1501.798 | 573.6127 | 1339.503 | 643.074  | 4030.039 | 2052.496 | 4821.687 | 1126.673 | 2525.049 | 561.2164 |
| 0        | 517.3715 | 369.4595 | 691.6077 | 173.4387 | 45.70944 | 142.5347 | 8467.578 | 4565.904 | 9691.927 | 529.4395 | 452.8925 | 164.6381 |
| 91.95081 | 587.8428 | 827.2361 | 891.7483 | 131.581  | 236.3781 | 44.31539 | 6921.491 | 3423.314 | 8797.016 | 583.5618 | 431.8697 | 172.179  |
| 1626.237 | 498.0346 | 980.3942 | 770.6186 | 1779.711 | 3309.753 | 1957.704 | 13024.94 | 6727.016 | 14715.42 | 785.9186 | 546.3155 | 188.3027 |
| 6970.338 | 464.2271 | 364.1763 | 821.9457 | 2903.824 | 4849.67  | 3653.299 | 7764.771 | 3592.446 | 10150.15 | 650.1396 | 1159.689 | 194.7566 |
| 51.98588 | 21.43403 | 0        | 21.72662 | 18.2311  | 88.19796 | 24.37241 | 0        | 0        | 0        | 0        | 361.2807 | 12.6829  |
| 102.9434 | 0        | 0        | 0        | 82.01057 | 37.00752 | 102.431  | 3290.566 | 105.7055 | 4685.665 | 0        | 0        | 0        |
| 0        | 540.4245 | 481.3349 | 13.80333 | 1034.487 | 1838.547 | 1160.871 | 834.8229 | 1858.115 | 667.6317 | 322.8276 | 807.4445 | 193.2349 |
| 93.52568 | 37.3946  | 54.32094 | 5734.925 | 0        | 0        | 0        | 0        | 0        | 0        | 25.28287 | 0        | 24.62929 |
| 4957.363 | 465.822  | 669.3899 | 955.2418 | 1863.529 | 2961.405 | 2154.675 | 7402.399 | 4465.947 | 9268.989 | 630.2991 | 711.2673 | 143.1704 |
| 9544.133 | 432.0582 | 622.1565 | 816.2083 | 6097.694 | 8708.161 | 7223.594 | 9497.195 | 4326.883 | 11181.71 | 574.7476 | 817.5655 | 191.519  |
| 806.8148 | 898.3602 | 306.938  | 2642.211 | 485.1683 | 1176.336 | 651.061  | 957.3787 | 973.9005 | 1445.215 | 37.1605  | 2114.781 | 77.5566  |

|          |          |          |          |          |          |          |          |          |          |          |          |          |
|----------|----------|----------|----------|----------|----------|----------|----------|----------|----------|----------|----------|----------|
| 0        | 1233.634 | 847.7624 | 2068.33  | 645.7943 | 302.9182 | 1044.008 | 423.7916 | 185.5127 | 462.022  | 1933.467 | 2600.028 | 1303.776 |
| 184.4019 | 278.205  | 501.0704 | 681.3881 | 219.0289 | 1431.989 | 132.6777 | 8254.186 | 3421.782 | 10377.97 | 747.2152 | 415.1472 | 101.8686 |
| 1417.803 | 271.1977 | 521.4174 | 1484.994 | 720.4159 | 3214.906 | 838.9546 | 8969.752 | 3278.088 | 11000.3  | 474.4143 | 473.5981 | 95.0559  |
| 3882.921 | 402.7057 | 369.9679 | 28.83242 | 2050.932 | 2887.208 | 2300.621 | 1158.542 | 1697.903 | 1640.224 | 290.8377 | 539.2999 | 146.2871 |
| 81.78825 | 0        | 392.1169 | 3154.382 | 123.3234 | 2629.62  | 322.6142 | 1144.494 | 309.4663 | 1133.693 | 745.9264 | 2417.142 | 81.5028  |
| 371.2719 | 451.032  | 233.9364 | 339.7134 | 309.1565 | 248.8826 | 727.9065 | 4506.593 | 2247.267 | 5100.547 | 242.1479 | 624.1792 | 25.01986 |
| 0        | 18.41364 | 237.7233 | 12.63622 | 66.25482 | 374.747  | 126.3192 | 682.9374 | 1346.108 | 600.4035 | 110.5121 | 588.1933 | 114.148  |
| 11230.43 | 72.90287 | 245.8659 | 198.414  | 3557.373 | 4969.754 | 4166.863 | 189.4292 | 16.21667 | 409.3739 | 175.5911 | 804.6019 | 31.29315 |
| 2855.767 | 131.2356 | 322.8998 | 697.4007 | 1457.028 | 2327.126 | 1792.368 | 6301.987 | 4121.267 | 6547.755 | 665.4814 | 490.825  | 150.1079 |
| 85.06178 | 0        | 0        | 1042.513 | 0        | 0        | 0        | 0        | 0        | 0        | 42.82354 | 0        | 0        |
| 8055.256 | 671.1109 | 647.1542 | 1092.806 | 2753.888 | 7505.351 | 3175.977 | 11839.67 | 5855.256 | 12274.02 | 715.0681 | 789.2681 | 120.5768 |
| 402.6571 | 143.369  | 236.8548 | 264.0306 | 198.407  | 2640.39  | 235.8343 | 6401.676 | 325.5478 | 8144.895 | 447.0278 | 87.48828 | 106.7952 |
| 2852.564 | 185.3367 | 263.1939 | 633.478  | 1015.578 | 2683.855 | 1069.146 | 4972.921 | 2226.124 | 6505.005 | 286.1391 | 269.6379 | 25.83723 |
| 5463.243 | 1431.757 | 256.6821 | 5245.58  | 1293.871 | 8069.113 | 1614.594 | 4254.86  | 2365.887 | 4416.171 | 251.8656 | 1870.587 | 41.64679 |
| 0        | 38.40567 | 0        | 0        | 0        | 96.92849 | 0        | 0        | 0        | 0        | 42.30951 | 438.9665 | 64.5316  |
| 2702.302 | 105.7457 | 148.1111 | 305.9272 | 823.6733 | 1414.944 | 1099.997 | 3326.592 | 1797.778 | 4990.594 | 302.4965 | 157.1457 | 17.97548 |
| 4114.358 | 451.458  | 421.7138 | 534.6819 | 2425.186 | 3680.06  | 3011.008 | 2582.79  | 2269.422 | 3538.419 | 495.3413 | 524.264  | 155.8411 |
| 2548.798 | 675.7534 | 300.2355 | 755.0356 | 1305.484 | 1684.712 | 1343.898 | 4140.795 | 1696.299 | 5731.074 | 316.8956 | 1953.761 | 102.805  |
| 49.10142 | 9.199751 | 0        | 35.51987 | 30.94213 | 80.71459 | 118.3279 | 0        | 0        | 0        | 0        | 42.25708 | 0        |
| 183.7627 | 15583.87 | 30172.74 | 31301.35 | 39.14856 | 257.4219 | 90.84736 | 2332.023 | 14.13212 | 4445.364 | 1771.328 | 2654.093 | 1442.372 |
| 0        | 194.9582 | 79.54831 | 221.2492 | 62.4344  | 0        | 74.50681 | 0        | 0        | 0        | 77.61182 | 12.09702 | 212.2483 |
| 3687.979 | 224.2891 | 332.5185 | 588.6224 | 1932.719 | 2310.166 | 2420.833 | 176.7246 | 412.1111 | 371.1407 | 470.9823 | 374.3977 | 155.1648 |
| 4376.572 | 706.2842 | 291.0419 | 375.2193 | 1031.014 | 3991.575 | 1104.173 | 5539.098 | 1046.371 | 6276.426 | 161.4546 | 533.5597 | 12.61794 |
| 191.1682 | 219.6045 | 304.0017 | 356.9714 | 191.0716 | 863.0812 | 302.1046 | 4928.824 | 2577.088 | 5820.892 | 311.1115 | 193.4804 | 90.29181 |
| 0        | 172.6156 | 201.5682 | 477.3234 | 0        | 0        | 0        | 5890.858 | 2027.735 | 6629.587 | 294.021  | 377.2152 | 63.18709 |
| 2699.35  | 61.86862 | 193.5821 | 640.7098 | 1016.691 | 1784.7   | 1274.988 | 4648.705 | 3114.786 | 4884.972 | 369.6219 | 331.6053 | 76.98527 |
| 2699.35  | 61.86862 | 193.5821 | 640.7098 | 1016.691 | 1784.7   | 1274.988 | 4648.705 | 3114.786 | 4884.972 | 369.6219 | 331.6053 | 76.98527 |
| 0        | 83.78357 | 143.9019 | 0        | 11.89769 | 5.057642 | 4.313252 | 110.9236 | 0        | 218.6724 | 32.44421 | 83.63185 | 34.63112 |
| 0        | 0        | 80.25139 | 30.96382 | 48.73597 | 2439.351 | 151.4023 | 3251.015 | 0        | 7050.753 | 109.3754 | 103.8405 | 126.9868 |
| 0        | 63.51491 | 55.52712 | 161.4687 | 0        | 0        | 0        | 730.9852 | 0        | 1700.171 | 13.48912 | 51.79514 | 9.405312 |
| 423.7061 | 206.2409 | 260.7002 | 275.1628 | 53.08426 | 86.81386 | 4.87751  | 5605.549 | 4305.372 | 6898.454 | 597.9512 | 302.0549 | 133.8222 |
| 6328.472 | 180.5174 | 266.6836 | 503.3944 | 1807.074 | 4679.954 | 2171.84  | 5668.779 | 3101.251 | 6623     | 362.226  | 193.3642 | 78.05992 |
| 358.1265 | 207.8428 | 259.8656 | 250.3232 | 43.85967 | 2909.238 | 3.994179 | 5340.859 | 4585.813 | 6578.765 | 646.6829 | 302.3547 | 147.098  |
| 125.0676 | 0        | 53.38963 | 270.7407 | 125.3207 | 863.1427 | 163.3724 | 137.9747 | 341.7787 | 147.8534 | 0        | 145.6429 | 0        |
| 249.5622 | 96.50208 | 129.2267 | 214.8493 | 53.60507 | 41.97831 | 38.37505 | 3824.778 | 272.3857 | 4462.707 | 225.3001 | 69.45115 | 24.80852 |

|          |          |          |          |          |          |          |          |          |          |          |          |          |
|----------|----------|----------|----------|----------|----------|----------|----------|----------|----------|----------|----------|----------|
| 416.0485 | 4700.42  | 4992.012 | 86.3266  | 115.9224 | 1104.637 | 66.97899 | 2779.662 | 215.3751 | 3704.759 | 853.418  | 1878.414 | 547.9446 |
| 0        | 489.0682 | 329.8651 | 890.5561 | 248.5427 | 115.0141 | 405.0916 | 160.1893 | 69.89407 | 174.5754 | 746.6643 | 1028.185 | 507.1961 |
| 0        | 37.56606 | 29.14476 | 119.091  | 0        | 0        | 0        | 373.3153 | 0        | 946.4098 | 6.345158 | 26.93608 | 4.939533 |
| 2772.263 | 136.6288 | 201.8537 | 355.7306 | 1297.19  | 1563.292 | 1606.112 | 106.7721 | 250.6839 | 224.917  | 286.0929 | 226.6834 | 93.71127 |
| 5351.088 | 107.6592 | 96.93444 | 86.07849 | 2263.072 | 5398.029 | 2808.38  | 683.567  | 12.41269 | 1062.425 | 47.63334 | 319.8351 | 42.93103 |
| 0        | 54.94397 | 45.98906 | 169.0171 | 0        | 0        | 0        | 481.6683 | 0        | 1025.114 | 10.19334 | 43.22318 | 7.73716  |
| 0        | 143.9189 | 164.533  | 380.3403 | 60.85185 | 42.82584 | 48.42321 | 2825.658 | 1464.923 | 2955.554 | 180.9588 | 160.636  | 42.48424 |
| 3456.967 | 95.78153 | 118.5823 | 279.9004 | 1055.198 | 2014.999 | 1329.852 | 3368.542 | 830.9053 | 4212.343 | 141.362  | 229.8728 | 19.81601 |
| 0        | 152.3337 | 148.3516 | 311.0405 | 0        | 0        | 0        | 5255.541 | 3158.203 | 4513.28  | 311.1991 | 179.2682 | 70.56722 |
| 107.6454 | 67.45937 | 111.5695 | 299.1392 | 48.99025 | 1694.561 | 32.4424  | 1641.911 | 547.8847 | 2214.714 | 72.57914 | 48.56232 | 16.31695 |
| 0        | 41.80273 | 35.17995 | 115.6329 | 0        | 0        | 0        | 467.5253 | 0        | 1125.233 | 8.343963 | 33.19141 | 5.881681 |
| 9513.55  | 1536.72  | 1134.482 | 1680.636 | 3287.256 | 3710.262 | 3696.078 | 17245.28 | 10550.73 | 19131.79 | 2825.715 | 1730.533 | 584.4223 |
| 50.31107 | 273.3345 | 51.0696  | 15.89999 | 0        | 0        | 22.7551  | 56.78904 | 0        | 0        | 57.19425 | 236.6998 | 55.05547 |
| 2940.681 | 94.91486 | 88.90671 | 210.5257 | 1460.865 | 1821.216 | 1812.374 | 2698.916 | 810.7348 | 3075.09  | 194.089  | 195.4679 | 50.89207 |
| 4091.029 | 69.28868 | 76.57301 | 76.53358 | 1621.763 | 4115.546 | 1950.222 | 590.0982 | 12.35808 | 926.6203 | 41.54177 | 228.9865 | 36.29136 |
| 0        | 0        | 48.30205 | 42.57527 | 0        | 0        | 0        | 1986.314 | 1476.901 | 1426.109 | 151.8939 | 101.3702 | 23.30742 |
| 0        | 0        | 99.27628 | 36.15486 | 25.9907  | 772.697  | 48.56218 | 109.7141 | 0        | 98.95068 | 61.80945 | 51.52445 | 106.577  |
| 0        | 0        | 99.29902 | 35.91051 | 26.11651 | 875.3533 | 48.89458 | 110.1166 | 0        | 99.12362 | 61.74638 | 51.8895  | 105.2706 |
| 0        | 9382.956 | 19682.78 | 20596.83 | 17.00158 | 108.8804 | 46.68625 | 1877.48  | 0        | 3529.58  | 1294.004 | 1989.319 | 1093.372 |
| 110.2279 | 114.2873 | 74.53012 | 61.23468 | 191.0716 | 267.0494 | 302.1046 | 1227.83  | 365.6138 | 1803.971 | 51.01012 | 80.72732 | 8.76314  |
| 0        | 0        | 0        | 5.633487 | 0        | 0        | 0        | 0        | 0        | 0        | 87.9718  | 0        | 0        |
| 0        | 0        | 0        | 0        | 38.66023 | 0        | 70.08499 | 20.13058 | 59.81314 | 53.39335 | 206.0719 | 140.1761 | 104.946  |
| 0        | 52.85299 | 75.63919 | 262.1749 | 18.83939 | 16.12048 | 7.794289 | 1340.851 | 549.7719 | 1514.695 | 72.24252 | 56.1553  | 9.23873  |
| 9182.393 | 1518.755 | 828.7657 | 1256.234 | 2612.837 | 3141.051 | 2766.076 | 16751.44 | 10082.82 | 18627    | 2124.643 | 1645.87  | 371.1195 |
| 0        | 40.75381 | 61.89904 | 221.4725 | 22.73954 | 15.75935 | 26.5717  | 811.9042 | 388.8743 | 1173.965 | 58.81901 | 45.10184 | 7.482122 |
| 0        | 40.75381 | 61.89904 | 221.4725 | 22.73954 | 15.75935 | 26.5717  | 811.9042 | 388.8743 | 1173.965 | 58.81901 | 45.10184 | 7.482122 |
| 73.72832 | 0        | 17.58284 | 0        | 34.75051 | 599.9153 | 49.067   | 67.90434 | 0        | 75.99951 | 26.54187 | 28.86587 | 30.49636 |
| 0        | 0        | 0        | 0        | 73.93765 | 0        | 101.9718 | 23.08629 | 0        | 71.77299 | 0        | 62.20336 | 0        |
| 39.95208 | 35.5182  | 8.668414 | 65.82553 | 0        | 0        | 0        | 1215.796 | 0        | 1604.747 | 9.874871 | 88.32157 | 9.377052 |
| 386.9168 | 206.221  | 24.22902 | 331.7322 | 0        | 0        | 0        | 0        | 0        | 0        | 0        | 104.5238 | 0        |
| 5397.612 | 450.6737 | 385.7004 | 732.3877 | 1591.089 | 2075.926 | 1699.179 | 8869.923 | 4265.776 | 10294.92 | 769.4484 | 629.3751 | 138.2655 |
| 3922.632 | 83.6911  | 116.2701 | 326.9343 | 1632.92  | 2593.072 | 1958.396 | 602.4629 | 0        | 1021.824 | 0        | 42.58827 | 0        |
| 3922.632 | 83.6911  | 116.2701 | 326.9343 | 1632.92  | 2593.072 | 1958.396 | 602.4629 | 0        | 1021.824 | 0        | 42.58827 | 0        |
| 1146.384 | 56.77999 | 103.3252 | 67.84464 | 534.5379 | 759.1905 | 509.7849 | 342.4648 | 0        | 772.0151 | 12.2077  | 55.13986 | 0        |
| 0        | 0        | 0        | 3.756559 | 0        | 0        | 0        | 0        | 0        | 0        | 59.28397 | 0        | 0        |

|          |          |          |          |          |          |          |          |          |          |          |          |          |
|----------|----------|----------|----------|----------|----------|----------|----------|----------|----------|----------|----------|----------|
| 144.3324 | 59.0312  | 86.51467 | 73.1851  | 0        | 0        | 0        | 2122.297 | 628.6759 | 2099.503 | 88.83511 | 55.32225 | 14.90942 |
| 0        | 57.66313 | 37.40986 | 60.09505 | 83.29356 | 24.12521 | 24.54543 | 968.3727 | 562.2835 | 1602.522 | 48.85692 | 104.7843 | 13.13523 |
| 69.53369 | 0        | 34.13917 | 0        | 33.28236 | 21.43576 | 19.81306 | 2070.5   | 891.9962 | 2227.033 | 112.1167 | 62.4189  | 20.36474 |
| 0        | 55.74355 | 35.26513 | 64.05029 | 93.29645 | 2095.439 | 23.36292 | 875.9453 | 510.2849 | 1481.061 | 43.81634 | 102.4146 | 11.87176 |
| 2729.234 | 0        | 0        | 0        | 1020.051 | 3623.091 | 1240.662 | 37.54668 | 0        | 108.6388 | 0        | 89.12582 | 0        |
| 0        | 0        | 0        | 0        | 14.66799 | 66.54092 | 0        | 164.5909 | 0        | 203.3856 | 54.60371 | 28.02247 | 46.14973 |
| 657.2993 | 15.27612 | 33.92593 | 85.87672 | 273.374  | 1030.821 | 296.2017 | 192.3228 | 0        | 347.1147 | 52.70891 | 11.62659 | 27.24159 |
| 4273.853 | 94.42368 | 36.03195 | 87.51534 | 1732.233 | 3057.82  | 2167.776 | 1940.102 | 982.2748 | 3739.702 | 24.52249 | 187.065  | 15.71694 |
| 0        | 30.59798 | 72.54446 | 0        | 10.65407 | 0        | 30.84644 | 37.4697  | 0        | 45.30523 | 0        | 0        | 0        |
| 0        | 32.75854 | 20.36661 | 37.38589 | 53.86383 | 1383.458 | 13.3804  | 513.7296 | 299.4692 | 880.6418 | 25.25924 | 60.40231 | 6.831342 |
| 102.2654 | 31.17348 | 45.70021 | 80.87626 | 0        | 0        | 3.919214 | 572.3227 | 84.3584  | 866.9859 | 49.79092 | 16.87139 | 8.609071 |
| 39.37892 | 4.419984 | 141.8618 | 0        | 39.04927 | 799.1177 | 82.13666 | 288.8081 | 218.7368 | 473.3894 | 0        | 86.90887 | 0        |
| 70.96641 | 34.15128 | 31.92248 | 55.87088 | 399.5819 | 517.2143 | 524.6986 | 2830.278 | 1164.351 | 3392.672 | 82.83591 | 90.52869 | 5.060905 |
| 82.90524 | 195.2666 | 65.95707 | 654.5255 | 106.8748 | 1430.261 | 145.8182 | 141.4516 | 126.6491 | 230.4683 | 24.82033 | 497.1431 | 27.92227 |
| 0        | 54.20572 | 37.84889 | 23.69127 | 80.65909 | 29.65738 | 18.706   | 1630.146 | 520.9953 | 2053.333 | 24.47317 | 76.21593 | 16.08879 |
| 0        | 0        | 0        | 0        | 0        | 0        | 0        | 0        | 0        | 0        | 0        | 0        | 0        |
| 0        | 49.10536 | 33.899   | 21.13223 | 71.97155 | 26.38053 | 16.64021 | 1471.574 | 468.2796 | 1858.165 | 21.79784 | 68.69311 | 14.45083 |
| 0        | 0        | 0        | 0        | 0        | 0        | 0        | 0        | 0        | 0        | 0        | 0        | 0        |
| 0        | 29.24698 | 39.31963 | 44.10321 | 0        | 0        | 0        | 141.5084 | 0        | 321.3537 | 2.582703 | 3.537448 | 3.392021 |
| 70.85427 | 30.29688 | 31.8698  | 55.24576 | 392.6317 | 515.5481 | 516.2385 | 2752.33  | 1146.691 | 3263.934 | 83.28773 | 91.13143 | 5.074918 |
| 864.3442 | 70.57753 | 27.23504 | 16.56298 | 610.7229 | 3003.737 | 745.5835 | 1441.196 | 482.8496 | 1815.445 | 16.04396 | 79.82071 | 14.54814 |
| 73.72832 | 0        | 0        | 0        | 0        | 0        | 0        | 0        | 0        | 14.77107 | 0        | 22.39888 | 0        |
| 0        | 0        | 0        | 0        | 0        | 0        | 0        | 0        | 0        | 0        | 0        | 0        | 0        |
| 286.0689 | 644.8339 | 78.80271 | 685.7999 | 111.4473 | 579.2787 | 112.9886 | 105.9631 | 155.6225 | 114.1037 | 0        | 973.8805 | 0        |
| 2664.006 | 198.182  | 378.723  | 797.6699 | 1580.877 | 2447.93  | 1877.514 | 6636.4   | 4337.084 | 0        | 0        | 494.1694 | 166.2655 |
| 201.4361 | 461.2794 | 55.35029 | 514.3348 | 79.30109 | 416.3636 | 79.99277 | 74.36841 | 110.5439 | 80.07368 | 0        | 706.7564 | 0        |
| 58.11721 | 168.1215 | 403.4347 | 2081.975 | 461.3462 | 353.8123 | 762.2753 | 339.3281 | 1064.717 | 407.3706 | 68.36209 | 1277.98  | 0        |
| 0        | 0        | 0        | 0        | 0        | 0        | 0        | 0        | 0        | 0        | 0        | 74.11502 | 0        |
| 404.7491 | 122.1652 | 30.0536  | 19.57678 | 54.88684 | 1874.372 | 40.51028 | 0        | 0        | 0        | 0        | 86.42831 | 0        |
| 3314.735 | 81.8381  | 103.7141 | 134.4717 | 1270.782 | 2502.212 | 1465.202 | 672.4995 | 0        | 1375.318 | 5.807404 | 79.06901 | 14.81912 |
| 0        | 3.801635 | 7.287814 | 0        | 1075.075 | 1578.466 | 1137.794 | 1563.286 | 827.0476 | 1539.811 | 0        | 0        | 0        |
| 957.117  | 0        | 0        | 0        | 344.8432 | 770.6971 | 494.5344 | 102.5771 | 0        | 261.6852 | 0        | 80.51602 | 0        |
| 82.68275 | 167.6705 | 44.5527  | 583.8865 | 14.3616  | 33.31253 | 24.53358 | 24.58379 | 178.3096 | 0        | 0        | 107.6692 | 96.79043 |
| 934.2878 | 270.6398 | 48.50356 | 1622.674 | 39.5984  | 15.19603 | 42.70596 | 0        | 182.2037 | 12.833   | 0        | 13.05346 | 0        |
| 0        | 444.1041 | 675.476  | 66.32446 | 52.92369 | 77.43936 | 0        | 126.7657 | 958.9455 | 123.2502 | 103.0534 | 1425.715 | 29.95287 |

|          |          |          |          |          |          |          |          |          |          |          |          |          |
|----------|----------|----------|----------|----------|----------|----------|----------|----------|----------|----------|----------|----------|
| 954.6578 | 294.4377 | 7.585566 | 1602.789 | 30.75392 | 12.672   | 39.11169 | 0        | 0        | 0        | 0        | 16.292   | 0        |
| 0        | 0        | 19.09201 | 141.7552 | 0        | 0        | 24.27995 | 0        | 0        | 16.75614 | 0        | 0        | 0        |
| 3436.519 | 65.34185 | 62.39334 | 12.53232 | 1185.436 | 4493.284 | 1426.851 | 237.3877 | 240.557  | 332.9256 | 0        | 98.42423 | 0        |
| 464.9586 | 0        | 0        | 0        | 435.1209 | 3472.114 | 367.1524 | 182.0051 | 0        | 581.307  | 0        | 99.37046 | 0        |
| 0        | 0        | 0        | 0        | 0        | 123.6967 | 0        | 0        | 0        | 0        | 0        | 0        | 0        |
| 0        | 20.28791 | 24.9783  | 7.330808 | 31.04744 | 9.716543 | 17.1449  | 1473.862 | 128.4702 | 1888.541 | 28.94382 | 47.31487 | 0        |
| 3178.055 | 0        | 0        | 0        | 1251.487 | 4206.023 | 1484.095 | 52.72282 | 0        | 145.5888 | 0        | 99.63846 | 0        |
| 3178.055 | 0        | 0        | 0        | 1251.487 | 4206.023 | 1484.095 | 52.72282 | 0        | 145.5888 | 0        | 99.63846 | 0        |
| 0        | 0        | 0        | 0        | 1528.934 | 1278.265 | 2268.332 | 125.9922 | 32.38226 | 178.8071 | 1716.489 | 2244.086 | 1241.175 |
| 0        | 0        | 0        | 0        | 0        | 1744.219 | 0        | 0        | 0        | 23.16441 | 0        | 0        | 0        |
| 0        | 0        | 0        | 0        | 0        | 3561.758 | 0        | 0        | 0        | 17.51861 | 0        | 0        | 0        |
| 0        | 12.94718 | 17.01327 | 7.330808 | 28.76778 | 0        | 0        | 1215.555 | 0        | 1625.45  | 20.70458 | 40.46559 | 0        |
| 0        | 0        | 0        | 0        | 0        | 58.90252 | 0        | 0        | 0        | 0        | 0        | 0        | 0        |
| 0        | 35.02041 | 0        | 0        | 20.95004 | 270.8817 | 28.88489 | 25.84895 | 0        | 47.14685 | 329.3878 | 87.13577 | 300.0134 |
| 0        | 0        | 0        | 0        | 40.05512 | 0        | 105.3325 | 47.679   | 0        | 226.9852 | 0        | 23.152   | 0        |
| 2377.105 | 0        | 0        | 0        | 936.292  | 3633.07  | 1155.391 | 84.6658  | 0        | 187.9734 | 0        | 135.3741 | 0        |
| 3636.075 | 60.86585 | 153.1629 | 32.39    | 2399.887 | 2926.038 | 3096.256 | 229.6985 | 0        | 908.2646 | 26.61745 | 98.6331  | 0        |
| 4349.253 | 58.25365 | 148.4075 | 30.94301 | 2771.108 | 3692.626 | 3303.521 | 219.2697 | 0        | 869.7583 | 25.43445 | 94.39861 | 0        |
| 0        | 0        | 0        | 0        | 90.42069 | 628.048  | 127.1512 | 347.1486 | 75.56781 | 502.8421 | 0        | 427.3652 | 0        |
| 2933.458 | 0        | 0        | 0        | 1165.562 | 3834.613 | 1344.922 | 38.69789 | 0        | 128.4572 | 0        | 42.47345 | 0        |
| 0        | 33.10761 | 152.1539 | 0        | 0        | 0        | 17.02455 | 36.58176 | 24.80885 | 55.98186 | 0        | 10.39629 | 0        |
| 2960.795 | 0        | 0        | 0        | 2059.558 | 2220.871 | 1939.127 | 55.11748 | 0        | 67.12049 | 0        | 0        | 0        |
| 16.75883 | 0        | 0        | 0        | 0        | 1421.366 | 0        | 0        | 0        | 0        | 0        | 0        | 0        |
| 2815.917 | 0        | 0        | 0        | 1127.565 | 4432.711 | 1285.96  | 80.80666 | 0        | 147.4176 | 0        | 88.9934  | 0        |
| 712.1981 | 0        | 0        | 0        | 806.2413 | 1336.443 | 647.3199 | 47.04494 | 0        | 57.26325 | 0        | 0        | 0        |
| 0        | 0        | 18.44615 | 135.3166 | 0        | 0        | 23.98904 | 0        | 0        | 16.60879 | 0        | 0        | 0        |
| 75.18717 | 0        | 0        | 0        | 0        | 0        | 0        | 0        | 0        | 0        | 0        | 16.24657 | 0        |
| 83.43029 | 0        | 0        | 0        | 0        | 0        | 0        | 0        | 125.148  | 0        | 0        | 0        | 0        |
| 0        | 0        | 0        | 0        | 27.95847 | 116.7454 | 24.00251 | 21.5846  | 0        | 40.19866 | 0        | 0        | 0        |
| 0        | 0        | 0        | 0        | 37.17531 | 728.837  | 58.39011 | 24.98735 | 0        | 29.73027 | 0        | 0        | 0        |
| 0        | 1554.248 | 819.6802 | 78.85065 | 1194.505 | 933.075  | 1521.272 | 0        | 0        | 0        | 9736.497 | 9650.749 | 7534.038 |
| 0        | 0        | 0        | 0        | 0        | 2292.817 | 0        | 0        | 0        | 0        | 0        | 0        | 0        |
| 0        | 0        | 0        | 0        | 0        | 2292.817 | 0        | 0        | 0        | 0        | 0        | 0        | 0        |
| 0        | 0        | 0        | 0        | 0        | 2292.817 | 0        | 0        | 0        | 0        | 0        | 0        | 0        |
| 2.191195 | 8.657402 | 15.63801 | 18.02528 | 24.32534 | 1694.561 | 32.4424  | 194.175  | 0        | 468.063  | 0        | 4.10496  | 0        |





|          |          |          |          |          |          |          |          |   |          |          |          |          |
|----------|----------|----------|----------|----------|----------|----------|----------|---|----------|----------|----------|----------|
| 0        | 0        | 0        | 0        | 0        | 0        | 0        | 0        | 0 | 0        | 0        | 0        | 0        |
| 0        | 0        | 0        | 0        | 0        | 0        | 0        | 0        | 0 | 0        | 0        | 0        | 0        |
| 0        | 0        | 0        | 0        | 0        | 0        | 0        | 0        | 0 | 0        | 0        | 0        | 0        |
| 0        | 0        | 0        | 0        | 0        | 0        | 0        | 0        | 0 | 0        | 0        | 0        | 0        |
| 0        | 0        | 0        | 0        | 0        | 13.37673 | 0        | 0        | 0 | 0        | 0        | 0        | 0        |
| 0        | 371.3183 | 262.4128 | 0        | 0        | 0        | 0        | 34.25019 | 0 | 84.77692 | 38.08246 | 633.0005 | 25.1716  |
| 0        | 0        | 0        | 0        | 0        | 0        | 0        | 0        | 0 | 0        | 246.6441 | 713.9955 | 184.9262 |
| 0        | 0        | 0        | 0        | 0        | 0        | 0        | 0        | 0 | 0        | 0        | 0        | 0        |
| 0        | 0        | 0        | 0        | 0        | 0        | 0        | 0        | 0 | 0        | 0        | 0        | 0        |
| 0        | 0        | 0        | 0        | 0        | 0        | 0        | 0        | 0 | 0        | 0        | 0        | 0        |
| 0        | 0        | 0        | 0        | 0        | 0        | 0        | 0        | 0 | 0        | 0        | 0        | 0        |
| 0        | 0        | 0        | 0        | 0        | 0        | 0        | 0        | 0 | 0        | 0        | 0        | 0        |
| 68.49778 | 20.55241 | 15.82267 | 1615.569 | 0        | 0        | 0        | 0        | 0 | 0        | 0        | 0        | 0        |
| 49.35823 | 15.12239 | 11.82156 | 401.1863 | 0        | 0        | 0        | 0        | 0 | 0        | 0        | 0        | 0        |
| 0        | 0        | 0        | 0        | 0        | 1582.311 | 0        | 0        | 0 | 0        | 0        | 0        | 0        |
| 0        | 0        | 0        | 0        | 2211.44  | 1627.14  | 1469.598 | 0        | 0 | 0        | 0        | 0        | 0        |
| 0        | 0        | 0        | 0        | 1541.882 | 959.1522 | 928.906  | 0        | 0 | 0        | 0        | 0        | 0        |
| 0        | 0        | 0        | 0        | 641.2793 | 913.9715 | 1145.867 | 0        | 0 | 0        | 0        | 0        | 0        |
| 0        | 0        | 0        | 0        | 588.593  | 446.7393 | 465.3842 | 0        | 0 | 0        | 0        | 0        | 0        |
| 0        | 0        | 0        | 0        | 687.9274 | 580.8126 | 449.9861 | 0        | 0 | 0        | 0        | 0        | 0        |
| 0        | 0        | 0        | 0        | 511.8786 | 393.2709 | 415.7737 | 0        | 0 | 0        | 0        | 0        | 0        |
| 0        | 0        | 0        | 0        | 525.8775 | 405.6335 | 401.6357 | 0        | 0 | 0        | 0        | 0        | 0        |
| 0        | 0        | 0        | 0        | 588.5582 | 486.7993 | 425.1959 | 0        | 0 | 0        | 0        | 0        | 0        |
| 0        | 0        | 0        | 0        | 596.6162 | 368.512  | 353.3676 | 0        | 0 | 0        | 0        | 0        | 0        |
| 0        | 0        | 0        | 0        | 571.363  | 454.6636 | 410.2595 | 0        | 0 | 0        | 0        | 0        | 0        |
| 0        | 0        | 0        | 0        | 544.9503 | 454.6636 | 387.3175 | 0        | 0 | 0        | 0        | 0        | 0        |
| 0        | 0        | 0        | 0        | 430.284  | 335.7701 | 340.1528 | 0        | 0 | 0        | 0        | 0        | 0        |
| 0        | 0        | 0        | 0        | 131.2993 | 499.2472 | 110.5112 | 0        | 0 | 0        | 0        | 0        | 0        |
| 0        | 0        | 0        | 0        | 131.2993 | 499.2472 | 110.5112 | 0        | 0 | 0        | 0        | 0        | 0        |
| 0        | 0        | 0        | 0        | 0        | 26.38078 | 0        | 0        | 0 | 0        | 0        | 0        | 0        |
| 0        | 0        | 0        | 0        | 0        | 0        | 0        | 0        | 0 | 0        | 0        | 0        | 0        |
| 0        | 0        | 0        | 0        | 0        | 0        | 0        | 0        | 0 | 0        | 0        | 0        | 0        |
| 0        | 0        | 0        | 0        | 0        | 0        | 0        | 0        | 0 | 0        | 0        | 0        | 0        |
| 0        | 42.01205 | 0        | 0        | 0        | 680.0527 | 0        | 0        | 0 | 0        | 0        | 0        | 0        |
| 0        | 0        | 0        | 0        | 0        | 0        | 0        | 0        | 0 | 13.05902 | 0        | 0        | 0        |

|   |   |   |   |   |          |          |   |   |          |   |   |   |
|---|---|---|---|---|----------|----------|---|---|----------|---|---|---|
| 0 | 0 | 0 | 0 | 0 | 0        | 0        | 0 | 0 | 16.65868 | 0 | 0 | 0 |
| 0 | 0 | 0 | 0 | 0 | 0        | 0        | 0 | 0 | 0        | 0 | 0 | 0 |
| 0 | 0 | 0 | 0 | 0 | 0        | 0        | 0 | 0 | 0        | 0 | 0 | 0 |
| 0 | 0 | 0 | 0 | 0 | 0        | 0        | 0 | 0 | 0        | 0 | 0 | 0 |
| 0 | 0 | 0 | 0 | 0 | 0        | 0        | 0 | 0 | 101.512  | 0 | 0 | 0 |
| 0 | 0 | 0 | 0 | 0 | 0        | 0        | 0 | 0 | 0        | 0 | 0 | 0 |
| 0 | 0 | 0 | 0 | 0 | 0        | 0        | 0 | 0 | 0        | 0 | 0 | 0 |
| 0 | 0 | 0 | 0 | 0 | 0        | 0        | 0 | 0 | 0        | 0 | 0 | 0 |
| 0 | 0 | 0 | 0 | 0 | 0        | 0        | 0 | 0 | 0        | 0 | 0 | 0 |
| 0 | 0 | 0 | 0 | 0 | 0        | 0        | 0 | 0 | 0        | 0 | 0 | 0 |
| 0 | 0 | 0 | 0 | 0 | 1366.932 | 0        | 0 | 0 | 0        | 0 | 0 | 0 |
| 0 | 0 | 0 | 0 | 0 | 887.6377 | 0        | 0 | 0 | 0        | 0 | 0 | 0 |
| 0 | 0 | 0 | 0 | 0 | 0        | 0        | 0 | 0 | 0        | 0 | 0 | 0 |
| 0 | 0 | 0 | 0 | 0 | 0        | 0        | 0 | 0 | 0        | 0 | 0 | 0 |
| 0 | 0 | 0 | 0 | 0 | 0        | 0        | 0 | 0 | 0        | 0 | 0 | 0 |
| 0 | 0 | 0 | 0 | 0 | 0        | 0        | 0 | 0 | 0        | 0 | 0 | 0 |
| 0 | 0 | 0 | 0 | 0 | 0        | 7.608587 | 0 | 0 | 0        | 0 | 0 | 0 |

**Table S5. Differential pathways of MP and SP**

| SampleID                                                                          | MP <sup>1</sup>     | MP            | SP <sup>2</sup>     | SP            |
|-----------------------------------------------------------------------------------|---------------------|---------------|---------------------|---------------|
|                                                                                   | mean rel. freq. (%) | std. dev. (%) | mean rel. freq. (%) | std. dev. (%) |
| CITRULBIO-PWY__L-citrulline_biosynthesis                                          | 0.021159034         | 0.003706412   | 0.013424167         | 0.006534992   |
| PHOSLIPSYN-PWY__superpathway_of_phospholipid_biosynthesis_I_(bacteria)            | 0.024598431         | 0.005740694   | 0.018865418         | 0.004391376   |
| PWY-3001__superpathway_of_L-isoleucine_biosynthesis_I                             | 0.027153344         | 0.003672868   | 0.022410985         | 0.003675898   |
| PWY-5724__superpathway_of_atrazine_degradation                                    | 4.75665E-05         | 4.33309E-05   | 1.2572E-05          | 1.48982E-05   |
| PWY-6147__6-hydroxymethyl-dihydropterin_diphosphate_biosynthesis_I                | 0.026769073         | 0.005984499   | 0.018191989         | 0.006053484   |
| PWY-6270__isoprene_biosynthesis_I                                                 | 0.028339074         | 0.005793414   | 0.02230317          | 0.00450116    |
| PWY-6470__peptidoglycan_biosynthesis_V_(&beta;-lactam_resistance)                 | 0.005099759         | 0.003050499   | 0.00212527          | 0.001478329   |
| PWY-6859__all-trans-farnesol_biosynthesis                                         | 0.010041589         | 0.002865498   | 0.005805721         | 0.003402999   |
| PWY-6897__thiamine_diphosphate_salvage_II                                         | 0.023426136         | 0.005226355   | 0.018353139         | 0.003887325   |
| PWY-7391__isoprene_biosynthesis_II_(engineered)                                   | 4.13212E-06         | 1.11252E-05   | 5.54879E-05         | 4.22582E-05   |
| PWY-7392__taxadiene_biosynthesis_(engineered)                                     | 0.017136158         | 0.004958658   | 0.010189544         | 0.004908223   |
| PWY-7399__methylphosphonate_degradation_II                                        | 4.23326E-05         | 4.89119E-05   | 5.44044E-06         | 7.74347E-06   |
| PWY-7560__methylerythritol_phosphate_pathway_II                                   | 0.028076995         | 0.005491129   | 0.021877777         | 0.004754633   |
| PWY-7663__gondoate_biosynthesis_(anaerobic)                                       | 0.036566332         | 0.006767871   | 0.027639163         | 0.006701987   |
| PWY1G-0__mycothiol_biosynthesis                                                   | 0.000155096         | 0.00019664    | 6.19886E-06         | 1.38611E-05   |
| RHAMCAT-PWY__L-rhamnose_degradation_I                                             | 0.024521188         | 0.00401655    | 0.01787698          | 0.00378012    |
| THISYNARA-PWY__superpathway_of_thiamine_diphosphate_biosynthesis_III_(eukaryotes) | 0.017496563         | 0.006500459   | 0.012840899         | 0.002574305   |

<sup>1</sup> MAP: mild acute pancreatitis

<sup>2</sup> SAP: severe acute pancreatitis

| p-values    | Difference<br>between means | 95.0% lower CI | 95.0% upper CI |
|-------------|-----------------------------|----------------|----------------|
| 0.045106178 | 0.007734867                 | 0.000228735    | 0.015240999    |
| 0.045352695 | 0.005733013                 | 0.000139318    | 0.011326709    |
| 0.037380656 | 0.004742358                 | 0.000342368    | 0.009142349    |
| 0.024744211 | 3.49945E-05                 | 5.03482E-06    | 6.49543E-05    |
| 0.024983113 | 0.008577084                 | 0.00134341     | 0.015810759    |
| 0.039873936 | 0.006035903                 | 0.000329479    | 0.011742328    |
| 0.01533738  | 0.002974489                 | 0.000647486    | 0.005301493    |
| 0.039877345 | 0.004235868                 | 0.000249785    | 0.008221951    |
| 0.047065932 | 0.005072998                 | 7.688E-05      | 0.010069115    |
| 0.041431019 | -5.13558E-05                | -9.98278E-05   | -2.88373E-06   |
| 0.025413398 | 0.006946614                 | 0.001060899    | 0.012832329    |
| 0.02434185  | 3.68922E-05                 | 5.57285E-06    | 6.82115E-05    |
| 0.039912087 | 0.006199218                 | 0.000343305    | 0.012055131    |
| 0.032991668 | 0.008927169                 | 0.000891044    | 0.016963294    |
| 0.022539126 | 0.000148897                 | 2.47994E-05    | 0.000272994    |
| 0.008967939 | 0.006644208                 | 0.00207027     | 0.011218146    |
| 0.049556722 | 0.004655664                 | 1.01117E-05    | 0.009301216    |

**Table S6. Differential pathways of BP and HP**

| SampleID                                                                               | BP <sup>1</sup>     | BP            | HP <sup>2</sup>     | HP            |
|----------------------------------------------------------------------------------------|---------------------|---------------|---------------------|---------------|
|                                                                                        | mean rel. freq. (%) | std. dev. (%) | mean rel. freq. (%) | std. dev. (%) |
| ARGDEG-PWY__superpathway_of_L-arginine,_putrescine,_and_4-aminobutanoate_degradatio    | 0.002165699         | 0.002769785   | 7.60173E-05         | 0.000101631   |
| GLYCOLYSIS-TCA-GLYOX-BYPASS__superpathway_of_glycolysis,_pyruvate_dehydrogenase,       | 0.003108903         | 0.003238529   | 0.000759234         | 0.001224408   |
| P125-PWY__superpathway_of_(R,R)-butanediol_biosynthesis                                | 0.00012687          | 0.000128038   | 3.3783E-05          | 1.34956E-05   |
| P4-PWY__superpathway_of_L-lysine,_L-threonine_and_L-methionine_biosynthesis_I          | 0.008436237         | 0.005822861   | 0.001418797         | 0.001607912   |
| P461-PWY__hexitol_fermentation_to_lactate,_formate,_ethanol_and_acetate                | 0.010125787         | 0.007130266   | 0.002911391         | 0.002422156   |
| PRPP-PWY__superpathway_of_histidine,_purine,_and_pyrimidine_biosynthesis               | 0.005832252         | 0.004015023   | 0.001685457         | 0.001823126   |
| PWY-241__C4_photosynthetic_carbon_assimilation_cycle,_NADP-ME_type                     | 0.008123295         | 0.003661533   | 0.001815976         | 0.000921509   |
| PWY-5138__fatty_acid_&beta;-oxidation_IV_(unsaturated,_even_number)                    | 0.004206018         | 0.003721562   | 0.000851014         | 0.000934201   |
| PWY-5464__superpathway_of_cytosolic_glycolysis_(plants),_pyruvate_dehydrogenase_and_TC | 0.000706457         | 0.000955348   | 6.92997E-05         | 8.58292E-05   |
| PWY-5837__2-carboxy-1,4-naphthoquinol_biosynthesis                                     | 0.00521974          | 0.003771746   | 0.001516086         | 0.001014942   |
| PWY-6318__L-phenylalanine_degradation_IV_(mammalian,_via_side_chain)                   | 0.000305106         | 0.000364949   | 2.04943E-05         | 2.59652E-05   |
| PWY-6961__L-ascorbate_degradation_II_(bacterial,_aerobic)                              | 0.00471578          | 0.00401642    | 0.000495049         | 0.000440703   |
| PWY-7039__phosphatidate_metabolism,_as_a_signaling_molecule                            | 0.000755165         | 0.001093534   | 7.94508E-06         | 1.06072E-05   |
| PWY-7115__C4_photosynthetic_carbon_assimilation_cycle,_NAD-ME_type                     | 0.005703364         | 0.004266004   | 0.001272676         | 0.001306303   |
| PWY-7117__C4_photosynthetic_carbon_assimilation_cycle,_PEPCK_type                      | 0.0115534           | 0.008056271   | 0.002172106         | 0.001115017   |
| PWY-724__superpathway_of_L-lysine,_L-threonine_and_L-methionine_biosynthesis_II        | 0.030228163         | 0.00570155    | 0.036768144         | 0.002787232   |
| PWY-7384__anaerobic_energy_metabolism_(invertebrates,_mitochondrial)                   | 0.000563639         | 0.000551089   | 7.8568E-06          | 4.38355E-06   |
| PWY-7385__1,3-propanediol_biosynthesis_(engineered)                                    | 0.002767547         | 0.003098647   | 0.000295572         | 0.00025031    |
| PWY-7388__octanoyl[acyl-carrier_protein]_biosynthesis_(mitochondria,_yeast)            | 0.003136693         | 0.004223304   | 5.76872E-05         | 6.89727E-05   |
| PWY-7409__phospholipid_remodeling_(phosphatidylethanolamine,_yeast)                    | 0.000664101         | 0.000764712   | 1.04035E-05         | 1.03126E-05   |
| PWY-8086__(S)-lactate_fermentation_to_propanoate,_acetate_and_hydrogen                 | 0.000568838         | 0.000566088   | 2.14944E-05         | 3.30833E-05   |
| PWY0-301__L-ascorbate_degradation_I_(bacterial,_anaerobic)                             | 0.00599546          | 0.006299551   | 0.000532705         | 0.00049909    |
| AEROBACTINSYN-PWY__aerobactin_biosynthesis                                             | 0.00086473          | 0.000945911   | 2.40676E-05         | 4.81352E-05   |
| ANAGLYCOLYSIS-PWY__glycolysis_III_(from_glucose)                                       | 0.034962533         | 0.005367186   | 0.04195172          | 0.00466697    |
| ARG+POLYAMINE-SYN__superpathway_of_arginine_and_polyamine_biosynthesis                 | 0.01296546          | 0.006004334   | 0.004675901         | 0.00270059    |
| ARGININE-SYN4-PWY__L-ornithine_biosynthesis_II                                         | 0.021047701         | 0.008819158   | 0.032108769         | 0.004141699   |
| ARO-PWY__chorismate_biosynthesis_I                                                     | 0.035886119         | 0.007348439   | 0.045502356         | 0.001805422   |
| AST-PWY__L-arginine_degradation_II_(AST_pathway)                                       | 0.003557747         | 0.003774464   | 0.000487176         | 0.000685444   |
| BRANCHED-CHAIN-AA-SYN-PWY__superpathway_of_branched_chain_amino_acid_biosynthe         | 0.033285204         | 0.005498978   | 0.039125992         | 0.002926403   |
| CARNMET-PWY__L-carnitine_degradation_I                                                 | 0.000405138         | 0.000481673   | 2.44893E-05         | 3.56558E-05   |
| COA-PWY-1__superpathway_of_coenzyme_A_biosynthesis_III_(mammals)                       | 0.033814407         | 0.009031048   | 0.046517962         | 0.002986842   |
| COA-PWY__coenzyme_A_biosynthesis_I_(prokaryotic)                                       | 0.03281977          | 0.008353899   | 0.045009322         | 0.00263839    |

|                                                                                   |             |             |             |             |
|-----------------------------------------------------------------------------------|-------------|-------------|-------------|-------------|
| COMPLETE-ARO-PWY__superpathway_of_aromatic_amino_acid_biosynthesis                | 0.033327019 | 0.006134028 | 0.039641681 | 0.002326273 |
| DAPLYSINESYN-PWY__L-lysine_biosynthesis_I                                         | 0.01219013  | 0.006092228 | 0.003405331 | 0.002354379 |
| DARABCATK12-PWY__D-arabinose_degradation_I                                        | 0.001237033 | 0.001339701 | 2.37327E-05 | 2.95941E-05 |
| DENOVOPURINE2-PWY__superpathway_of_purine_nucleotides_de_novo_biosynthesis_II     | 0.005279634 | 0.004031289 | 0.001434318 | 0.001749955 |
| DTDPRHAMSYN-PWY__dTDP-&beta;-L-rhamnose_biosynthesis                              | 0.052051795 | 0.018360696 | 0.075574574 | 0.016105196 |
| ECASYN-PWY__enterobacterial_common_antigen_biosynthesis                           | 0.002390164 | 0.00269509  | 0.000498336 | 0.000805294 |
| FAO-PWY__fatty_acid_&beta;-oxidation_I_(generic)                                  | 0.008581724 | 0.007822897 | 0.001207769 | 0.00122635  |
| FERMENTATION-PWY__mixed_acid_fermentation                                         | 0.011292899 | 0.007516619 | 0.004866456 | 0.001550686 |
| FOLSYN-PWY__superpathway_of_tetrahydrofolate_biosynthesis_and_salvage             | 0.004551286 | 0.0028932   | 0.000533115 | 0.000407788 |
| FUC-RHAMCAT-PWY__superpathway_of_fucose_and_rhamnose_degradation                  | 0.010418161 | 0.004709665 | 0.005284887 | 0.001076823 |
| FUCCAT-PWY__fucose_degradation                                                    | 0.007496646 | 0.004708682 | 0.00288439  | 0.000844301 |
| GALACT-GLUCUROCAT-PWY__superpathway_of_hexuronide_and_hexuronate_degradation      | 0.007182317 | 0.002050692 | 0.003372339 | 0.001292944 |
| GALACTARDEG-PWY__D-galactarate_degradation_I                                      | 0.010316187 | 0.007239478 | 0.002270532 | 0.000717292 |
| GALACTITOLCAT-PWY__galactitol_degradation                                         | 0.003494662 | 0.003076415 | 0.000254999 | 0.000241693 |
| GLUCARDEG-PWY__D-glucarate_degradation_I                                          | 0.006352149 | 0.005385259 | 0.001139788 | 0.000640606 |
| GLUCARGALACTSUPER-PWY__superpathway_of_D-glucarate_and_D-galactarate_degradatic   | 0.010316187 | 0.007239478 | 0.002270532 | 0.000717292 |
| GLUDEG-I-PWY__GABA_shunt                                                          | 0.006334703 | 0.003713241 | 0.000836595 | 0.000753745 |
| GLYCOL-GLYOXDEG-PWY__superpathway_of_glycol_metabolism_and_degradation            | 0.001271806 | 0.001366357 | 0.000138207 | 0.000240764 |
| GLYOXYLATE-BYPASS__glyoxylate_cycle                                               | 0.006350418 | 0.005657803 | 0.0009123   | 0.000655085 |
| HCAMHPDEG-PWY__3-phenylpropanoate_and_3-(3-hydroxyphenyl)propanoate_degradation_t | 0.003220125 | 0.002930772 | 0.000359931 | 0.000390667 |
| HEME-BIOSYNTHESIS-II-1__heme_b_biosynthesis_V_(aerobic)                           | 0.004738799 | 0.004192032 | 0.000617985 | 0.000574751 |
| HEME-BIOSYNTHESIS-II__heme_b_biosynthesis_I_(aerobic)                             | 0.005238325 | 0.003915329 | 0.001054776 | 0.000798406 |
| HEMESYN2-PWY__heme_b_biosynthesis_II_(oxygen-independent)                         | 0.006091146 | 0.004640277 | 0.001082329 | 0.000652195 |
| HEXITOLDEGSUPER-PWY__superpathway_of_hexitol_degradation_(bacteria)               | 0.006916166 | 0.005128051 | 0.000715965 | 0.00064214  |
| HISDEG-PWY__L-histidine_degradation_I                                             | 0.018624219 | 0.00692709  | 0.030214282 | 0.002780766 |
| HISTSYN-PWY__L-histidine_biosynthesis                                             | 0.031850331 | 0.009306337 | 0.047846047 | 0.004435592 |
| HOMOSER-METSYN-PWY__L-methionine_biosynthesis_I                                   | 0.006924609 | 0.006487952 | 0.000581437 | 0.000660541 |
| ILEUSYN-PWY__L-isoleucine_biosynthesis_I_(from_threonine)                         | 0.034946062 | 0.005508684 | 0.041049551 | 0.002913155 |
| KDO-NAGLIPASYN-PWY__superpathway_of_(Kdo)2-lipid_A_biosynthesis                   | 0.001820267 | 0.001390732 | 0.000429443 | 0.000679522 |
| KETOGLUCONMET-PWY__ketogluconate_metabolism                                       | 0.004056512 | 0.003288608 | 0.000261902 | 0.000236756 |
| LIPASYN-PWY__phospholipases                                                       | 0.003860612 | 0.004068724 | 0.000839674 | 0.000961965 |
| LPSSYN-PWY__superpathway_of_lipopolysaccharide_biosynthesis                       | 0.001225107 | 0.001540188 | 5.93136E-05 | 9.31602E-05 |
| MET-SAM-PWY__superpathway_of_S-adenosyl-L-methionine_biosynthesis                 | 0.010134531 | 0.007902107 | 0.001117903 | 0.001249712 |
| METHGLYUT-PWY__superpathway_of_methylglyoxal_degradation                          | 0.002069196 | 0.00134375  | 0.000778743 | 0.000509874 |
| METSYN-PWY__superpathway_of_L-homoserine_and_L-methionine_biosynthesis            | 0.009782272 | 0.007983908 | 0.000995719 | 0.001118582 |

|                                                                                    |             |             |             |             |
|------------------------------------------------------------------------------------|-------------|-------------|-------------|-------------|
| NAD-BIOSYNTHESIS-II__NAD_salvage_pathway_III_(to_nicotinamide_riboside)            | 0.003264144 | 0.002900905 | 0.000461401 | 0.000578936 |
| NONMEVIP-PWY__methylerythritol_phosphate_pathway_I                                 | 0.036115982 | 0.009533291 | 0.049373857 | 0.003499856 |
| ORNARGDEG-PWY__superpathway_of_L-arginine_and_L-ornithine_degradation              | 0.002165699 | 0.002769785 | 7.60173E-05 | 0.000101631 |
| ORNDEG-PWY__superpathway_of_ornithine_degradation                                  | 0.006744571 | 0.005950284 | 0.000969586 | 0.000765535 |
| P105-PWY__TCA_cycle_IV_(2-oxoglutarate_decarboxylase)                              | 0.006006466 | 0.005736605 | 0.000859364 | 0.000971375 |
| P122-PWY__heterolactic_fermentation                                                | 0.003006976 | 0.003004581 | 0.000357157 | 0.000496696 |
| P161-PWY__acetylene_degradation_(anaerobic)                                        | 0.009845579 | 0.007457707 | 0.002907745 | 0.002160364 |
| P164-PWY__purine_nucleobases_degradation_I_(anaerobic)                             | 0.007782676 | 0.003653876 | 0.004252035 | 0.000947239 |
| P42-PWY__incomplete_reductive_TCA_cycle                                            | 0.003092855 | 0.001531958 | 0.001599421 | 0.000973828 |
| P441-PWY__superpathway_of_N-acetylneuraminate_degradation                          | 0.014171885 | 0.006112692 | 0.006569042 | 0.003349056 |
| PANTO-PWY__phosphopantothenate_biosynthesis_I                                      | 0.031513772 | 0.007770404 | 0.041947986 | 0.003087997 |
| PANTOSYN-PWY__superpathway_of_coenzyme_A_biosynthesis_I_(bacteria)                 | 0.030576537 | 0.008409132 | 0.042520638 | 0.002445194 |
| PEPTIDOLYCAN SYN-PWY__peptidoglycan_biosynthesis_I_(meso-diaminopimelate_containir | 0.037536306 | 0.009035896 | 0.046874457 | 0.002754402 |
| POLYAMINSYN3-PWY__superpathway_of_polyamine_biosynthesis_II                        | 0.001514915 | 0.001677623 | 0.000376001 | 0.000295654 |
| POLYAMSYN-PWY__superpathway_of_polyamine_biosynthesis_I                            | 0.010005722 | 0.005769044 | 0.002722161 | 0.001735773 |
| PWY-1861__formaldehyde_assimilation_II_(assimilatory_RuMP_Cycle)                   | 0.00326008  | 0.003181725 | 0.0008619   | 0.000388078 |
| PWY-2942__L-lysine_biosynthesis_III                                                | 0.034075647 | 0.006514541 | 0.042997214 | 0.002919716 |
| PWY-3841__folate_transformations_II_(plants)                                       | 0.036394777 | 0.007661073 | 0.045922481 | 0.001632908 |
| PWY-4041__&gamma;-glutamyl_cycle                                                   | 0.01136976  | 0.006319512 | 0.004243467 | 0.00160078  |
| PWY-4984__urea_cycle                                                               | 0.011731182 | 0.006582538 | 0.017924786 | 0.001801792 |
| PWY-5022__4-aminobutanoate_degradation_V                                           | 0.006086959 | 0.00315399  | 0.001113681 | 0.000827731 |
| PWY-5030__L-histidine_degradation_III                                              | 0.015783038 | 0.008126553 | 0.025002942 | 0.004624169 |
| PWY-5088__L-glutamate_degradation_VIII_(to_propanoate)                             | 0.000289649 | 0.000356353 | 3.20665E-05 | 4.81374E-05 |
| PWY-5097__L-lysine_biosynthesis_VI                                                 | 0.0341227   | 0.00703892  | 0.042814872 | 0.002002611 |
| PWY-5103__L-isoleucine_biosynthesis_III                                            | 0.030572433 | 0.00533914  | 0.035544826 | 0.003182588 |
| PWY-5104__L-isoleucine_biosynthesis_IV                                             | 0.004867948 | 0.003630687 | 0.000269574 | 0.000264675 |
| PWY-5136__fatty_acid_&beta;-oxidation_II_(plant_peroxisome)                        | 0.012957238 | 0.010107066 | 0.002942391 | 0.00099934  |
| PWY-5180__toluene_degradation_I_(aerobic)_via_o-cresol                             | 0.00361892  | 0.004299087 | 0           | 0           |
| PWY-5188__tetrapyrrole_biosynthesis_I_(from_glutamate)                             | 0.009861135 | 0.003666032 | 0.00571847  | 0.00124562  |
| PWY-5189__tetrapyrrole_biosynthesis_II_(from_glycine)                              | 0.004220387 | 0.003530375 | 0.000351306 | 0.000161833 |
| PWY-5345__superpathway_of_L-methionine_biosynthesis_(by_sulphydrylation)           | 0.012518588 | 0.004770895 | 0.004699197 | 0.003810844 |
| PWY-5347__superpathway_of_L-methionine_biosynthesis_(transsulfuration)             | 0.010501916 | 0.008355954 | 0.001127156 | 0.001259034 |
| PWY-5367__petroselinic_acid_biosynthesis                                           | 0.002322129 | 0.001911276 | 0.00013424  | 0.000100828 |
| PWY-5384__sucrose_degradation_IV_(sucrose_phosphorylase)                           | 0.014614169 | 0.004580235 | 0.01125517  | 0.001397241 |
| PWY-5415__catechol_degradation_I_(meta-cleavage_pathway)                           | 8.1348E-05  | 9.96973E-05 | 4.4019E-06  | 8.8038E-06  |

|                                                                      |             |             |             |             |
|----------------------------------------------------------------------|-------------|-------------|-------------|-------------|
| PWY-5497__purine_nucleobases_degradation_II_(anaerobic)              | 0.006265439 | 0.002066687 | 0.003135583 | 0.000444892 |
| PWY-561__superpathway_of_glyoxylate_cycle_and_fatty_acid_degradation | 0.00741565  | 0.006660459 | 0.001096894 | 0.000973318 |
| PWY-5656__mannosylglycerate_biosynthesis_I                           | 0.003279573 | 0.002810423 | 0.000167718 | 0.000175008 |
| PWY-5667__CDP-diacylglycerol_biosynthesis_I                          | 0.0364088   | 0.006450074 | 0.046252298 | 0.001232808 |
| PWY-5675__nitrate_reduction_V_(assimilatory)                         | 0.007104794 | 0.006004014 | 0.000682092 | 0.0006353   |
| PWY-5676__acetyl-CoA_fermentation_to_butanoate_II                    | 0.005792106 | 0.001834401 | 0.003301172 | 0.001347329 |
| PWY-5686__UMP_biosynthesis_I                                         | 0.038520792 | 0.010222778 | 0.053179635 | 0.002669465 |
| PWY-5692__allantoin_degradation_to_glyoxylate_II                     | 0.000515094 | 0.000446623 | 1.32977E-05 | 1.80959E-05 |
| PWY-5695__inosine_5'-phosphate_degradation                           | 0.038839676 | 0.008363251 | 0.049829096 | 0.002938641 |
| PWY-5705__allantoin_degradation_to_glyoxylate_III                    | 0.001159192 | 0.000994843 | 8.10847E-05 | 7.00147E-05 |
| PWY-5723__Rubisco_shunt                                              | 0.010669912 | 0.008673465 | 0.001113603 | 0.001162384 |
| PWY-5747__2-methylcitrate_cycle_II                                   | 0.001361177 | 0.001806737 | 3.54399E-05 | 1.83473E-05 |
| PWY-5838__superpathway_of_menaquinol-8_biosynthesis_I                | 0.010120303 | 0.004850699 | 0.00450046  | 0.00281748  |
| PWY-5840__superpathway_of_menaquinol-7_biosynthesis                  | 0.007365415 | 0.004631632 | 0.002317954 | 0.001739405 |
| PWY-5845__superpathway_of_menaquinol-9_biosynthesis                  | 0.008596019 | 0.004192688 | 0.004308081 | 0.002672903 |
| PWY-5850__superpathway_of_menaquinol-6_biosynthesis                  | 0.007190089 | 0.004825037 | 0.001968335 | 0.002008775 |
| PWY-5855__ubiquinol-7_biosynthesis_(early_decarboxylation)           | 0.001712336 | 0.001882709 | 0.000297723 | 0.000525753 |
| PWY-5860__superpathway_of_demethylmenaquinol-6_biosynthesis_I        | 0.005704721 | 0.004279808 | 0.00136095  | 0.00141388  |
| PWY-5861__superpathway_of_demethylmenaquinol-8_biosynthesis_I        | 0.00822421  | 0.004533689 | 0.003187973 | 0.002050333 |
| PWY-5862__superpathway_of_demethylmenaquinol-9_biosynthesis          | 0.006771287 | 0.003776745 | 0.003041281 | 0.001936372 |
| PWY-5896__superpathway_of_menaquinol-10_biosynthesis                 | 0.007190089 | 0.004825037 | 0.001968335 | 0.002008775 |
| PWY-5897__superpathway_of_menaquinol-11_biosynthesis                 | 0.009608681 | 0.004842498 | 0.004061162 | 0.002583101 |
| PWY-5898__superpathway_of_menaquinol-12_biosynthesis                 | 0.009608681 | 0.004842498 | 0.004061162 | 0.002583101 |
| PWY-5899__superpathway_of_menaquinol-13_biosynthesis                 | 0.009608681 | 0.004842498 | 0.004061162 | 0.002583101 |
| PWY-5913__partial_TCA_cycle_(obligate_autotrophs)                    | 0.008408866 | 0.007118206 | 0.001282749 | 0.000769177 |
| PWY-5918__superpathway_of_heme_b_biosynthesis_from_glutamate         | 0.005634052 | 0.004010202 | 0.00112916  | 0.000790693 |
| PWY-5920__superpathway_of_heme_b_biosynthesis_from_glycine           | 0.003247456 | 0.002577914 | 0.000409009 | 0.000269025 |
| PWY-5971__palmitate_biosynthesis_(type_II_fatty_acid_synthase)       | 0.018107692 | 0.006531561 | 0.007059057 | 0.003920958 |
| PWY-5972__stearate_biosynthesis_I_(animals)                          | 0.000583566 | 0.000709052 | 6.49285E-05 | 6.49256E-05 |
| PWY-5973__cis-vaccenate_biosynthesis                                 | 0.030954675 | 0.008591861 | 0.043206789 | 0.003093263 |
| PWY-6071__superpathway_of_phenylethylamine_degradation               | 0.000780813 | 0.001206604 | 0           | 0           |
| PWY-6121__5-aminoimidazole_ribonucleotide_biosynthesis_I             | 0.035450177 | 0.00725157  | 0.046261238 | 0.003521545 |
| PWY-6122__5-aminoimidazole_ribonucleotide_biosynthesis_II            | 0.035189842 | 0.006854347 | 0.04573407  | 0.00386505  |
| PWY-6123__inosine-5'-phosphate_biosynthesis_I                        | 0.029768934 | 0.008956018 | 0.043397751 | 0.002288255 |
| PWY-6124__inosine-5'-phosphate_biosynthesis_II                       | 0.028768205 | 0.009205309 | 0.042495811 | 0.002434662 |



|                                                                                      |             |             |             |             |
|--------------------------------------------------------------------------------------|-------------|-------------|-------------|-------------|
| PWY-6126__superpathway_of_adenosine_nucleotides_de_novo_biosynthesis_II              | 0.031948945 | 0.008638071 | 0.042853044 | 0.007456343 |
| PWY-6147__6-hydroxymethyl-dihydropterin_diphosphate_biosynthesis_I                   | 0.022084959 | 0.006864512 | 0.029592092 | 0.004901626 |
| PWY-6163__chorismate_biosynthesis_from_3-dehydroquinate                              | 0.037108937 | 0.008901647 | 0.048145063 | 0.002857701 |
| PWY-6277__superpathway_of_5-aminoimidazole_ribonucleotide_biosynthesis               | 0.035189842 | 0.006854347 | 0.04573407  | 0.00386505  |
| PWY-6293__superpathway_of_L-cysteine_biosynthesis_(fungi)                            | 0.002141332 | 0.001725652 | 0.000559022 | 0.000761094 |
| PWY-6353__purine_nucleotides_degradation_II_(aerobic)                                | 0.015716609 | 0.006272979 | 0.004499461 | 0.000525814 |
| PWY-6385__peptidoglycan_biosynthesis_III_(mycobacteria)                              | 0.038611619 | 0.008584356 | 0.047610125 | 0.002842348 |
| PWY-6386__UDP-N-acetylmuramoyl-pentapeptide_biosynthesis_II_(lysine-containing)      | 0.037734926 | 0.009292192 | 0.046689714 | 0.002605612 |
| PWY-6387__UDP-N-acetylmuramoyl-pentapeptide_biosynthesis_I_(meso-diaminopimelate_cor | 0.037865484 | 0.008999407 | 0.046722883 | 0.002682397 |
| PWY-6531__mannitol_cycle                                                             | 0.005531803 | 0.003905716 | 0.001668372 | 0.00082096  |
| PWY-6545__pyrimidine_deoxyribonucleotides_de_novo_biosynthesis_III                   | 0.006346778 | 0.002874659 | 0.002507027 | 0.002524446 |
| PWY-6549__L-glutamine_biosynthesis_III                                               | 0.003963877 | 0.001806678 | 0.002101283 | 0.000698655 |
| PWY-6606__guanosine_nucleotides_degradation_II                                       | 0.009928691 | 0.005398159 | 0.002709395 | 0.000687196 |
| PWY-6608__guanosine_nucleotides_degradation_III                                      | 0.018202996 | 0.008202763 | 0.008690649 | 0.003491379 |
| PWY-6609__adenine_and_adenosine_salvage_III                                          | 0.040328474 | 0.009776397 | 0.050270359 | 0.003150387 |
| PWY-6612__superpathway_of_tetrahydrofolate_biosynthesis                              | 0.003264301 | 0.002190244 | 0.000357505 | 0.000274901 |
| PWY-6630__superpathway_of_L-tyrosine_biosynthesis                                    | 0.008663733 | 0.00362863  | 0.005356402 | 0.00150762  |
| PWY-6690__cinnamate_and_3-hydroxycinnamate_degradation_to_2-hydroxypentadienoate     | 0.003220125 | 0.002930772 | 0.000359931 | 0.000390667 |
| PWY-6700__queuosine_biosynthesis_I_(de_novo)                                         | 0.034281358 | 0.010195481 | 0.045794756 | 0.004591482 |
| PWY-6703__preQ0_biosynthesis                                                         | 0.025574171 | 0.008854503 | 0.036072892 | 0.005878137 |
| PWY-6708__ubiquinol-8_biosynthesis_(early_decarboxylation)                           | 0.000434523 | 0.000458192 | 1.41889E-05 | 1.62672E-05 |
| PWY-6803__phosphatidylcholine_acyl_editing                                           | 0.005934512 | 0.005003141 | 0.000831305 | 0.000896885 |
| PWY-6895__superpathway_of_thiamine_diphosphate_biosynthesis_II                       | 0.013084158 | 0.004878037 | 0.007155945 | 0.004138619 |
| PWY-6969__TCA_cycle_V_(2-oxoglutarate_synthase)                                      | 0.008156029 | 0.00585866  | 0.003899758 | 0.001042629 |
| PWY-702__L-methionine_biosynthesis_II                                                | 0.00887794  | 0.004701588 | 0.003589816 | 0.00072121  |
| PWY-7111__pyruvate_fermentation_to_isobutanol_(engineered)                           | 0.029361135 | 0.00724671  | 0.022955504 | 0.003040245 |
| PWY-7118__chitin_deacetylation                                                       | 0.006022501 | 0.005578056 | 0.000610396 | 0.00049368  |
| PWY-7184__pyrimidine_deoxyribonucleotides_de_novo_biosynthesis_I                     | 0.008875571 | 0.004434197 | 0.002795585 | 0.00291437  |
| PWY-7187__pyrimidine_deoxyribonucleotides_de_novo_biosynthesis_II                    | 0.003129352 | 0.002706832 | 0.000720728 | 0.000941494 |
| PWY-7199__pyrimidine_deoxyribonucleosides_salvage                                    | 0.030999496 | 0.008727523 | 0.041973197 | 0.005531296 |
| PWY-7204__pyridoxal_5'-phosphate_salvage_II_(plants)                                 | 0.003575775 | 0.002982554 | 0.000380403 | 0.000235471 |
| PWY-7209__superpathway_of_pyrimidine_ribonucleosides_degradation                     | 0.000707127 | 0.000566468 | 0.00021866  | 0.000200706 |
| PWY-7211__superpathway_of_pyrimidine_deoxyribonucleotides_de_novo_biosynthesis       | 0.006638064 | 0.003666528 | 0.001947681 | 0.00142689  |
| PWY-7221__guanosine_ribonucleotides_de_novo_biosynthesis                             | 0.038344024 | 0.008277945 | 0.051146678 | 0.002863369 |
| PWY-7229__superpathway_of_adenosine_nucleotides_de_novo_biosynthesis_I               | 0.036030336 | 0.008875371 | 0.048020316 | 0.006479506 |

|                                                                                       |             |             |             |             |
|---------------------------------------------------------------------------------------|-------------|-------------|-------------|-------------|
| PWY-7269__mitochondrial_NADPH_production_(yeast)                                      | 0.002681471 | 0.003155609 | 0.000369529 | 0.000653665 |
| PWY-7294__D-xylose_degradation_IV                                                     | 0.000496974 | 0.000624883 | 6.38359E-05 | 5.40385E-05 |
| PWY-7328__superpathway_of_UDP-glucose-derived_O-antigen_building_blocks_biosynthesis  | 0.014323918 | 0.004212664 | 0.0079694   | 0.003055519 |
| PWY-7345__superpathway_of_anaerobic_sucrose_degradation                               | 0.018818578 | 0.004133476 | 0.013483734 | 0.003449906 |
| PWY-7389__superpathway_of_anaerobic_energy_metabolism_(invertebrates)                 | 0.000624292 | 0.000712225 | 1.26066E-05 | 6.99125E-06 |
| PWY-7391__isoprene_biosynthesis_II_(engineered)                                       | 2.76175E-05 | 3.81171E-05 | 0           | 0           |
| PWY-7446__sulfoquinovose_degradation_I                                                | 0.000951276 | 0.001054654 | 4.467E-05   | 3.25076E-05 |
| PWY-7616__methanol_oxidation_to_carbon_dioxide                                        | 0.000402646 | 0.000596512 | 1.79543E-05 | 1.69771E-05 |
| PWY-7663__gondoate_biosynthesis_(anaerobic)                                           | 0.031326434 | 0.007693756 | 0.040525446 | 0.003213722 |
| PWY-7761__NAD_salvage_pathway_II_(PNC_IV_cycle)                                       | 0.007748391 | 0.003348204 | 0.003284484 | 0.002022991 |
| PWY-7790__UMP_biosynthesis_II                                                         | 0.038520792 | 0.010222778 | 0.053179635 | 0.002669465 |
| PWY-7791__UMP_biosynthesis_III                                                        | 0.038520792 | 0.010222778 | 0.053179635 | 0.002669465 |
| PWY-7805__(aminomethyl)phosphonate_degradation                                        | 0.000778638 | 0.000912583 | 1.11755E-05 | 1.56582E-05 |
| PWY-7807__glyphosate_degradation_III                                                  | 0.000827728 | 0.000988465 | 1.00228E-05 | 1.40428E-05 |
| PWY-7851__coenzyme_A_biosynthesis_II_(eukaryotic)                                     | 0.032156123 | 0.008877666 | 0.044388292 | 0.002687805 |
| PWY-7858__(5Z)-dodecenoate_biosynthesis_II                                            | 0.006143561 | 0.005126816 | 0.000906508 | 0.001200537 |
| PWY-7873__D-erythronate_degradation_II                                                | 0.000496171 | 0.000540307 | 5.08402E-06 | 6.77598E-06 |
| PWY-7874__L-threonate_degradation                                                     | 0.000563561 | 0.000581375 | 6.43192E-06 | 9.22667E-06 |
| PWY-7883__anhydromuropeptides_recycling_II                                            | 0.002791527 | 0.001835957 | 0.000654824 | 0.000733247 |
| PWY-7942__5-oxo-L-proline_metabolism                                                  | 0.003174968 | 0.002746887 | 0.000641002 | 0.000704044 |
| PWY-7953__UDP-N-acetylmuramoyl-pentapeptide_biosynthesis_III_(meso-diaminopimelate_cc | 0.036709318 | 0.009935097 | 0.045663894 | 0.002913579 |
| PWY-7977__L-methionine_biosynthesis_IV                                                | 0.036916998 | 0.007002873 | 0.047058447 | 0.001692191 |
| PWY-801__homocysteine_and_cysteine_interconversion                                    | 0.001717595 | 0.001842866 | 0.000344695 | 0.000473044 |
| PWY-821__superpathway_of_sulfur_amino_acid_biosynthesis_(Saccharomyces_cerevisiae)    | 0.006882962 | 0.00346676  | 0.001551904 | 0.001813954 |
| PWY-841__superpathway_of_purine_nucleotides_de_novo_biosynthesis_I                    | 0.028504403 | 0.006538493 | 0.036079879 | 0.00293906  |
| PWY-I9__L-cysteine_biosynthesis_VI_(from_L-methionine)                                | 0.012433055 | 0.005532343 | 0.004463271 | 0.00125135  |
| PWY0-1061__superpathway_of_L-alanine_biosynthesis                                     | 0.005557539 | 0.004130487 | 0.001340783 | 0.001490706 |
| PWY0-1221__putrescine_degradation_II                                                  | 0.000479961 | 0.000574091 | 1.33161E-05 | 2.00517E-05 |
| PWY0-1261__anhydromuropeptides_recycling_I                                            | 0.009972215 | 0.004612924 | 0.004959877 | 0.002023518 |
| PWY0-1277__3-phenylpropanoate_and_3-(3-hydroxyphenyl)propanoate_degradation           | 0.004304269 | 0.003877483 | 0.000546384 | 0.00048929  |
| PWY0-1297__superpathway_of_purine_deoxyribonucleosides_degradation                    | 0.012075226 | 0.007753548 | 0.004849    | 0.003730469 |
| PWY0-1298__superpathway_of_pyrimidine_deoxyribonucleosides_degradation                | 0.009772891 | 0.00634875  | 0.00295315  | 0.001775625 |
| PWY0-1319__CDP-diacylglycerol_biosynthesis_II                                         | 0.036412531 | 0.006450044 | 0.046252298 | 0.001232808 |
| PWY0-1337__oleate_&beta;-oxidation                                                    | 0.001715064 | 0.001650314 | 0.000505044 | 0.000669809 |
| PWY0-1338__polymyxin_resistance                                                       | 0.00291536  | 0.00249975  | 0.000490157 | 0.000620845 |

|                                                                                 |             |             |             |             |
|---------------------------------------------------------------------------------|-------------|-------------|-------------|-------------|
| PWY0-1415__superpathway_of_heme_b_biosynthesis_from_uroporphyrinogen-III        | 0.004549783 | 0.004153254 | 0.000615849 | 0.000678194 |
| PWY0-1477__ethanolamine_utilization                                             | 0.0162519   | 0.011456033 | 0.006158261 | 0.002857432 |
| PWY0-1479__tRNA_processing                                                      | 0.009792071 | 0.004940605 | 0.002689113 | 0.00135851  |
| PWY0-1533__methylphosphonate_degradation_I                                      | 0.000504307 | 0.000614041 | 5.76857E-06 | 8.09258E-06 |
| PWY0-321__phenylacetate_degradation_I_(aerobic)                                 | 0.000693239 | 0.001065588 | 0           | 0           |
| PWY0-41__allantoin_degradation_IV_(anaerobic)                                   | 0.000779287 | 0.000734175 | 2.43869E-05 | 2.47849E-05 |
| PWY0-42__2-methylcitrate_cycle_I                                                | 0.002357241 | 0.002151155 | 8.94676E-05 | 8.62816E-05 |
| PWY0-461__L-lysine_degradation_I                                                | 0.000740997 | 0.000761328 | 0.000137889 | 0.000195018 |
| PWY0-781__aspartate_superpathway                                                | 0.008442207 | 0.005341362 | 0.001487193 | 0.001679306 |
| PWY0-845__superpathway_of_pyridoxal_5'-phosphate_biosynthesis_and_salvage       | 0.019901896 | 0.005239526 | 0.026806661 | 0.002068725 |
| PWY1ZNC-1__assimilatory_sulfate_reduction_IV                                    | 0.00561438  | 0.005697771 | 0.000812101 | 0.000790832 |
| PWY3O-4107__NAD_salvage_pathway_V_(PNC_V_cycle)                                 | 0.00506605  | 0.003186209 | 0.000641369 | 0.000513064 |
| PWY4LZ-257__superpathway_of_fermentation_(Chlamydomonas_reinhardtii)            | 0.008684328 | 0.005384088 | 0.003152249 | 0.002237793 |
| PWY66-389__phytol_degradation                                                   | 0.003306585 | 0.004471947 | 0.000407369 | 0.000650666 |
| PWY66-429__fatty_acid_biosynthesis_initiation_(mitochondria)                    | 0.038150166 | 0.010085941 | 0.052090323 | 0.0044691   |
| PWY66-430__myristate_biosynthesis_(mitochondria)                                | 0.003081377 | 0.004121781 | 5.91943E-05 | 7.11359E-05 |
| PYRIDNUCSAL-PWY__NAD_salvage_pathway_I_(PNC_VI_cycle)                           | 0.005113522 | 0.002902073 | 0.000781966 | 0.000589836 |
| PYRIDNUCSYN-PWY__NAD_de_novo_biosynthesis_I_(from_aspartate)                    | 0.027641753 | 0.005941213 | 0.035889493 | 0.002736483 |
| PYRIDOXSYN-PWY__pyridoxal_5'-phosphate_biosynthesis_I                           | 0.018268409 | 0.005645019 | 0.0263287   | 0.002857398 |
| REDCITCYC__TCA_cycle_VI_(Helicobacter)                                          | 0.00221309  | 0.002142979 | 0.000534157 | 0.000646945 |
| RIBOSYN2-PWY__flavin_biosynthesis_I_(bacteria_and_plants)                       | 0.026220349 | 0.007271282 | 0.034506966 | 0.003651701 |
| SALVADEHYPOX-PWY__adenosine_nucleotides_degradation_II                          | 0.01557131  | 0.009337596 | 0.002370991 | 0.000260953 |
| SER-GLYSYN-PWY__superpathway_of_L-serine_and_glycine_biosynthesis_I             | 0.02814391  | 0.003941    | 0.035004715 | 0.001822876 |
| SO4ASSIM-PWY__assimilatory_sulfate_reduction_I                                  | 0.01154145  | 0.008375677 | 0.00202666  | 0.001790748 |
| SULFATE-CYS-PWY__superpathway_of_sulfate_assimilation_and_cysteine_biosynthesis | 0.013447638 | 0.006958533 | 0.003543398 | 0.003116943 |
| TCA-GLYOX-BYPASS__superpathway_of_glyoxylate_bypass_and_TCA                     | 0.006829661 | 0.006087386 | 0.001020204 | 0.000950272 |
| TCA__TCA_cycle_I_(prokaryotic)                                                  | 0.007882868 | 0.006187929 | 0.002081521 | 0.00178533  |
| THREOCAT-PWY__superpathway_of_L-threonine_metabolism                            | 0.003070301 | 0.00367332  | 0.000570905 | 0.001028681 |
| THRESYN-PWY__superpathway_of_L-threonine_biosynthesis                           | 0.031747383 | 0.00573963  | 0.03836777  | 0.004155772 |
| TRNA-CHARGING-PWY__tRNA_charging                                                | 0.036394938 | 0.008658162 | 0.04522765  | 0.001976327 |
| UBISYN-PWY__superpathway_of_ubiquinol-8_biosynthesis_(early_decarboxylation)    | 0.000481871 | 0.000507505 | 1.57606E-05 | 1.79759E-05 |
| UDPNAGSYN-PWY__UDP-N-acetyl-D-glucosamine_biosynthesis_I                        | 0.01511802  | 0.005014984 | 0.009664663 | 0.003587339 |
| URDEGR-PWY__superpathway_of_allantoin_degradation_in_plants                     | 0.000515094 | 0.000446623 | 1.32977E-05 | 1.80959E-05 |
| VALSYN-PWY__L-valine_biosynthesis                                               | 0.043056383 | 0.006436889 | 0.054092173 | 0.004053338 |

<sup>1</sup> BP: biliary acute pancreatitis

<sup>2</sup> HP: hypertriglyceridemia-induced pancreatitis

| p-values    | Difference<br>between means | 95.0% lower CI | 95.0% upper CI |
|-------------|-----------------------------|----------------|----------------|
| 0.017591784 | 0.002089682                 | 0.000427918    | 0.003751447    |
| 0.045766676 | 0.002349669                 | 4.97691E-05    | 0.004649569    |
| 0.022111749 | 9.30875E-05                 | 1.55064E-05    | 0.000170669    |
| 0.001191661 | 0.00701744                  | 0.003209127    | 0.010825753    |
| 0.006397785 | 0.007214396                 | 0.00231893     | 0.012109862    |
| 0.011573215 | 0.004146796                 | 0.001074798    | 0.007218793    |
| 3.10296E-05 | 0.006307319                 | 0.003950369    | 0.008664269    |
| 0.008914233 | 0.003355004                 | 0.00096037     | 0.005749638    |
| 0.032858515 | 0.000637157                 | 6.01111E-05    | 0.001214204    |
| 0.005473947 | 0.003703654                 | 0.001248515    | 0.006158794    |
| 0.014971181 | 0.000284612                 | 6.48494E-05    | 0.000504374    |
| 0.002307242 | 0.004220731                 | 0.001784714    | 0.006656749    |
| 0.028480403 | 0.00074722                  | 9.19383E-05    | 0.001402501    |
| 0.004432184 | 0.004430688                 | 0.001579299    | 0.007282077    |
| 0.001066738 | 0.009381294                 | 0.004457563    | 0.014305026    |
| 0.007867954 | -0.006539981                | -0.011064985   | -0.002014977   |
| 0.00301572  | 0.000555782                 | 0.000225561    | 0.000886002    |
| 0.013300497 | 0.002471974                 | 0.000603291    | 0.004340657    |
| 0.020862164 | 0.003079006                 | 0.000547842    | 0.005610171    |
| 0.008747168 | 0.000653697                 | 0.000195418    | 0.001111977    |
| 0.004049257 | 0.000547344                 | 0.000207021    | 0.000887667    |
| 0.008191441 | 0.005462755                 | 0.00166468     | 0.009260829    |
| 0.006960921 | 0.000840662                 | 0.00027246     | 0.001408865    |
| 0.03723882  | -0.006989187                | -0.013441243   | -0.000537131   |
| 0.001547672 | 0.008289558                 | 0.003715827    | 0.01286329     |
| 0.003770565 | -0.011061067                | -0.017919104   | -0.004203031   |
| 0.000498913 | -0.009616237                | -0.014329277   | -0.004903197   |
| 0.013563418 | 0.003070571                 | 0.00072755     | 0.005413592    |
| 0.016337232 | -0.005840788                | -0.010415028   | -0.001266548   |
| 0.013953147 | 0.000380648                 | 9.04761E-05    | 0.000670821    |
| 0.000433472 | -0.012703555                | -0.018858064   | -0.006549046   |
| 0.000271128 | -0.012189553                | -0.017814932   | -0.006564174   |

|             |              |              |              |
|-------------|--------------|--------------|--------------|
| 0.00726548  | -0.006314662 | -0.010675524 | -0.0019538   |
| 0.000573    | 0.008784799  | 0.004424572  | 0.013145025  |
| 0.006151572 | 0.001213301  | 0.000410202  | 0.002016399  |
| 0.016015375 | 0.003845315  | 0.000823201  | 0.006867429  |
| 0.04080926  | -0.023522779 | -0.045767164 | -0.001278394 |
| 0.039664856 | 0.001891828  | 0.000100444  | 0.003683212  |
| 0.005219004 | 0.007373955  | 0.002564071  | 0.012183839  |
| 0.010750221 | 0.006426443  | 0.001707838  | 0.011145048  |
| 0.000230073 | 0.00401817   | 0.002248563  | 0.005787777  |
| 0.002184796 | 0.005133274  | 0.002142174  | 0.008124374  |
| 0.004187167 | 0.004612257  | 0.001692102  | 0.007532411  |
| 0.001108227 | 0.003809978  | 0.001906716  | 0.00571324   |
| 0.001506254 | 0.008045655  | 0.003665     | 0.01242631   |
| 0.002239467 | 0.003239663  | 0.001385053  | 0.005094274  |
| 0.004161655 | 0.005212362  | 0.001938812  | 0.008485911  |
| 0.001506254 | 0.008045655  | 0.003665     | 0.01242631   |
| 0.000132325 | 0.005498108  | 0.003170833  | 0.007825384  |
| 0.011987551 | 0.0011336    | 0.000287306  | 0.001979893  |
| 0.004350697 | 0.005438118  | 0.002001618  | 0.008874618  |
| 0.003991862 | 0.002860193  | 0.001071707  | 0.00464868   |
| 0.003813906 | 0.004120814  | 0.001559781  | 0.006681847  |
| 0.00235824  | 0.004183549  | 0.001728518  | 0.00663858   |
| 0.001939661 | 0.005008817  | 0.002170969  | 0.007846666  |
| 0.000776068 | 0.006200201  | 0.003077892  | 0.009322509  |
| 0.00016568  | -0.011590063 | -0.016618631 | -0.006561496 |
| 0.000330051 | -0.015995716 | -0.023286169 | -0.008705263 |
| 0.003831726 | 0.006343172  | 0.00241503   | 0.010271314  |
| 0.012737313 | -0.006103489 | -0.01066902  | -0.001537958 |
| 0.01717755  | 0.001390824  | 0.000287369  | 0.002494279  |
| 0.001118485 | 0.00379461   | 0.001814058  | 0.005775162  |
| 0.025209085 | 0.003020937  | 0.000425541  | 0.005616334  |
| 0.017448878 | 0.001165793  | 0.000239633  | 0.002091953  |
| 0.00128507  | 0.009016628  | 0.004155665  | 0.013877591  |
| 0.011201432 | 0.001290453  | 0.000334965  | 0.002245942  |
| 0.001671323 | 0.008786553  | 0.003904515  | 0.013668591  |

|             |              |              |              |
|-------------|--------------|--------------|--------------|
| 0.004824922 | 0.002802743  | 0.000987547  | 0.004617939  |
| 0.000659364 | -0.013257875 | -0.019961083 | -0.006554667 |
| 0.017591784 | 0.002089682  | 0.000427918  | 0.003751447  |
| 0.004124867 | 0.005774985  | 0.00214864   | 0.00940133   |
| 0.007354494 | 0.005147102  | 0.001603609  | 0.008690596  |
| 0.008133546 | 0.002649819  | 0.000796723  | 0.004502915  |
| 0.00854516  | 0.006937835  | 0.002013736  | 0.011861934  |
| 0.005861498 | 0.00353064   | 0.001167427  | 0.005893853  |
| 0.042205011 | 0.001493435  | 6.33376E-05  | 0.002923532  |
| 0.007485042 | 0.007602843  | 0.00242924   | 0.012776446  |
| 0.001176561 | -0.010434214 | -0.016053273 | -0.004815155 |
| 0.000293984 | -0.011944101 | -0.017500785 | -0.006387418 |
| 0.004556744 | -0.009338151 | -0.015371387 | -0.003304916 |
| 0.033738884 | 0.001138914  | 9.98187E-05  | 0.002178009  |
| 0.000925027 | 0.007283561  | 0.003443031  | 0.011124091  |
| 0.018713147 | 0.00239818   | 0.000462596  | 0.004333764  |
| 0.001623635 | -0.008921567 | -0.013875844 | -0.003967289 |
| 0.000700044 | -0.009527704 | -0.014353425 | -0.004701984 |
| 0.001840512 | 0.007126293  | 0.003054268  | 0.011198317  |
| 0.007415051 | -0.006193604 | -0.010491702 | -0.001895506 |
| 8.59156E-05 | 0.004973278  | 0.002929184  | 0.007017371  |
| 0.014575798 | -0.009219903 | -0.016261218 | -0.002178589 |
| 0.023516958 | 0.000257582  | 4.00067E-05  | 0.000475158  |
| 0.001014465 | -0.008692172 | -0.013322653 | -0.004061692 |
| 0.042343247 | -0.004972393 | -0.009740438 | -0.000204348 |
| 0.000523246 | 0.004598374  | 0.002411516  | 0.006785231  |
| 0.003486702 | 0.010014847  | 0.003899254  | 0.01613044   |
| 0.009570268 | 0.00361892   | 0.001042999  | 0.00619484   |
| 0.002928995 | 0.004142665  | 0.001625504  | 0.006659826  |
| 0.001658262 | 0.003869082  | 0.001749427  | 0.005988736  |
| 0.00942757  | 0.007819391  | 0.002492682  | 0.0131461    |
| 0.001455627 | 0.009374761  | 0.004247852  | 0.014501669  |
| 0.001189562 | 0.002187889  | 0.001039579  | 0.003336199  |
| 0.033243476 | 0.003358999  | 0.000300259  | 0.006417739  |
| 0.016007812 | 7.69461E-05  | 1.67442E-05  | 0.000137148  |

|             |              |              |              |
|-------------|--------------|--------------|--------------|
| 0.000108489 | 0.003129856  | 0.001826632  | 0.004433079  |
| 0.004919128 | 0.006318756  | 0.002238242  | 0.01039927   |
| 0.001536655 | 0.003111856  | 0.001421498  | 0.004802213  |
| 9.54232E-05 | -0.009843498 | -0.013863964 | -0.005823031 |
| 0.002017706 | 0.006422703  | 0.002784405  | 0.010061     |
| 0.016267798 | 0.002490934  | 0.000580142  | 0.004401726  |
| 0.000225096 | -0.014658843 | -0.021278608 | -0.008039078 |
| 0.001373682 | 0.000501796  | 0.000233762  | 0.00076983   |
| 0.000946153 | -0.01098942  | -0.016788873 | -0.005189968 |
| 0.001808675 | 0.001078107  | 0.000479105  | 0.00167711   |
| 0.001646631 | 0.009556309  | 0.004262274  | 0.014850343  |
| 0.020185248 | 0.001325738  | 0.000243072  | 0.002408403  |
| 0.01408107  | 0.005619843  | 0.00136117   | 0.009878516  |
| 0.004844036 | 0.005047461  | 0.001765829  | 0.008329093  |
| 0.03495717  | 0.004287938  | 0.000365957  | 0.008209919  |
| 0.006731871 | 0.005221754  | 0.001668074  | 0.008775433  |
| 0.027098347 | 0.001414613  | 0.000180629  | 0.002648598  |
| 0.005939736 | 0.00434377   | 0.001428035  | 0.007259505  |
| 0.007354821 | 0.005036236  | 0.001573951  | 0.008498522  |
| 0.021112604 | 0.003730006  | 0.00065451   | 0.006805502  |
| 0.006731871 | 0.005221754  | 0.001668074  | 0.008775433  |
| 0.010899471 | 0.005547519  | 0.001513819  | 0.00958122   |
| 0.010899471 | 0.005547519  | 0.001513819  | 0.00958122   |
| 0.010899471 | 0.005547519  | 0.001513819  | 0.00958122   |
| 0.003265489 | 0.007126117  | 0.00281047   | 0.011441764  |
| 0.001569285 | 0.004504892  | 0.001998379  | 0.007011406  |
| 0.00162135  | 0.002838446  | 0.001276788  | 0.004400105  |
| 0.00157695  | 0.011048635  | 0.005188089  | 0.016909181  |
| 0.021198179 | 0.000518638  | 9.02208E-05  | 0.000947055  |
| 0.000492567 | -0.012252114 | -0.018255311 | -0.006248917 |
| 0.036345    | 0.000780813  | 5.78422E-05  | 0.001503785  |
| 0.001215667 | -0.010811061 | -0.016546421 | -0.0050757   |
| 0.002142506 | -0.010544228 | -0.016449387 | -0.004639068 |
| 0.000120192 | -0.013628818 | -0.019407595 | -0.007850041 |
| 0.000154835 | -0.013727606 | -0.019701471 | -0.007753741 |



|             |              |              |              |
|-------------|--------------|--------------|--------------|
| 0.040852335 | -0.0109041   | -0.021220855 | -0.000587345 |
| 0.037986465 | -0.007507134 | -0.014498945 | -0.000515322 |
| 0.001234823 | -0.011036126 | -0.017055066 | -0.005017185 |
| 0.002142506 | -0.010544228 | -0.016449387 | -0.004639068 |
| 0.020541543 | 0.00158231   | 0.000279502  | 0.002885119  |
| 1.9907E-05  | 0.011217148  | 0.007432212  | 0.015002084  |
| 0.004780245 | -0.008998506 | -0.014850414 | -0.003146599 |
| 0.006524736 | -0.008954787 | -0.015050052 | -0.002859523 |
| 0.006156566 | -0.008857399 | -0.014835897 | -0.002878902 |
| 0.004216968 | 0.003863431  | 0.00140687   | 0.006319993  |
| 0.034966205 | 0.003839751  | 0.000353431  | 0.007326072  |
| 0.007548804 | 0.001862594  | 0.000569246  | 0.003155942  |
| 0.000324208 | 0.007219296  | 0.003930667  | 0.010507924  |
| 0.004541193 | 0.009512347  | 0.003414977  | 0.015609717  |
| 0.00560089  | -0.009941885 | -0.016558706 | -0.003325065 |
| 0.000347174 | 0.002906796  | 0.001573121  | 0.004240471  |
| 0.018424665 | 0.00330733   | 0.00063703   | 0.005977631  |
| 0.003991862 | 0.002860193  | 0.001071707  | 0.00464868   |
| 0.006531972 | -0.011513398 | -0.019284254 | -0.003742543 |
| 0.020736463 | -0.010498721 | -0.019028995 | -0.001968447 |
| 0.005681887 | 0.000420334  | 0.00014546   | 0.000695209  |
| 0.00314035  | 0.005103207  | 0.002000495  | 0.008205919  |
| 0.044420061 | 0.005928213  | 0.00019036   | 0.011666066  |
| 0.024536227 | 0.00425627   | 0.000624947  | 0.007887594  |
| 0.001431915 | 0.005288125  | 0.002400742  | 0.008175508  |
| 0.022086651 | 0.006405631  | 0.001051445  | 0.011759817  |
| 0.004003876 | 0.005412105  | 0.002043689  | 0.00878052   |
| 0.009509683 | 0.006079985  | 0.001839557  | 0.010320414  |
| 0.014724092 | 0.002408624  | 0.000537324  | 0.004279925  |
| 0.012909095 | -0.010973702 | -0.01910362  | -0.002843783 |
| 0.001973378 | 0.003195372  | 0.001397235  | 0.00499351   |
| 0.018085922 | 0.000488467  | 9.46496E-05  | 0.000882284  |
| 0.00162432  | 0.004690384  | 0.002059569  | 0.007321198  |
| 0.000198374 | -0.012802654 | -0.018516018 | -0.00708929  |
| 0.01625623  | -0.011989979 | -0.021190283 | -0.002789676 |

|             |              |              |              |
|-------------|--------------|--------------|--------------|
| 0.025010136 | 0.002311942  | 0.00033017   | 0.004293714  |
| 0.027440788 | 0.000433138  | 5.59276E-05  | 0.000810349  |
| 0.009048163 | 0.006354518  | 0.002010252  | 0.010698784  |
| 0.033366282 | 0.005334844  | 0.00054205   | 0.010127638  |
| 0.008506783 | 0.000611685  | 0.00018488   | 0.00103849   |
| 0.021494964 | 2.76175E-05  | 4.77855E-06  | 5.04564E-05  |
| 0.008480551 | 0.000906606  | 0.000274098  | 0.001539113  |
| 0.037004637 | 0.000384692  | 2.69941E-05  | 0.000742389  |
| 0.003440934 | -0.009199012 | -0.014873243 | -0.003524782 |
| 0.007596353 | 0.004463907  | 0.001446561  | 0.007481252  |
| 0.000225096 | -0.014658843 | -0.021278608 | -0.008039078 |
| 0.000225096 | -0.014658843 | -0.021278608 | -0.008039078 |
| 0.00963306  | 0.000767462  | 0.000220507  | 0.001314418  |
| 0.01059241  | 0.000817705  | 0.000225323  | 0.001410088  |
| 0.000425812 | -0.012232169 | -0.018150505 | -0.006313833 |
| 0.003617792 | 0.005237054  | 0.00197093   | 0.008503177  |
| 0.006008988 | 0.000491087  | 0.000167298  | 0.000814877  |
| 0.004267625 | 0.000557129  | 0.000208697  | 0.000905561  |
| 0.003619445 | 0.002136703  | 0.000806548  | 0.003466857  |
| 0.00785814  | 0.002533966  | 0.000760667  | 0.004307265  |
| 0.010562886 | -0.008954576 | -0.015531434 | -0.002377718 |
| 0.000186455 | -0.010141449 | -0.014622069 | -0.00566083  |
| 0.026292455 | 0.001372901  | 0.00018292   | 0.002562881  |
| 0.001421789 | 0.005331059  | 0.00247538   | 0.008186737  |
| 0.005489858 | -0.007575475 | -0.012554701 | -0.002596249 |
| 0.000185393 | 0.007969785  | 0.004460929  | 0.01147864   |
| 0.006842605 | 0.004216756  | 0.001328506  | 0.007105006  |
| 0.011744832 | 0.000466645  | 0.000122255  | 0.000811035  |
| 0.007673212 | 0.005012338  | 0.001538167  | 0.008486509  |
| 0.004154408 | 0.003757884  | 0.00139639   | 0.006119378  |
| 0.02358112  | 0.007226225  | 0.001123103  | 0.013329348  |
| 0.003025103 | 0.006819741  | 0.002657346  | 0.010982137  |
| 9.57878E-05 | -0.009839767 | -0.013860216 | -0.005819318 |
| 0.048851864 | 0.00121002   | 6.88192E-06  | 0.002413158  |
| 0.005468627 | 0.002425203  | 0.000819356  | 0.00403105   |

|             |              |              |              |
|-------------|--------------|--------------|--------------|
| 0.005108106 | 0.003933934  | 0.001374309  | 0.006493559  |
| 0.010210127 | 0.010093639  | 0.002729484  | 0.017457793  |
| 0.000236768 | 0.007102957  | 0.00387424   | 0.010331675  |
| 0.011780179 | 0.000498539  | 0.000130557  | 0.000866521  |
| 0.035512087 | 0.000693239  | 5.47614E-05  | 0.001331716  |
| 0.002636723 | 0.0007549    | 0.000314512  | 0.001195288  |
| 0.00220638  | 0.002267774  | 0.000976833  | 0.003558715  |
| 0.019157092 | 0.000603108  | 0.000111667  | 0.001094549  |
| 0.000772875 | 0.006955013  | 0.003362254  | 0.010547772  |
| 0.001341826 | -0.006904765 | -0.010684391 | -0.003125139 |
| 0.010271882 | 0.004802279  | 0.001319571  | 0.008284987  |
| 0.000232615 | 0.004424682  | 0.002462668  | 0.006386696  |
| 0.00929414  | 0.005532078  | 0.00156935   | 0.009494806  |
| 0.039465172 | 0.002899215  | 0.000160048  | 0.005638383  |
| 0.001437471 | -0.013940157 | -0.021570663 | -0.006309651 |
| 0.02027642  | 0.003022183  | 0.000551791  | 0.005492576  |
| 0.000122165 | 0.004331556  | 0.002512455  | 0.006150656  |
| 0.001647582 | -0.00824774  | -0.012824358 | -0.003671122 |
| 0.002081021 | -0.008060291 | -0.012624725 | -0.003495857 |
| 0.023852895 | 0.001678933  | 0.00025124   | 0.003106626  |
| 0.009015739 | -0.008286617 | -0.014140819 | -0.002432415 |
| 0.000203891 | 0.013200319  | 0.007601203  | 0.018799435  |
| 0.000245124 | -0.006860805 | -0.009902796 | -0.003818815 |
| 0.001501629 | 0.00951479   | 0.004237167  | 0.014792413  |
| 0.001191756 | 0.00990424   | 0.004613685  | 0.015194795  |
| 0.004797765 | 0.005809457  | 0.002067511  | 0.009551402  |
| 0.008092408 | 0.005801347  | 0.001719055  | 0.009883639  |
| 0.042840761 | 0.002499395  | 9.04755E-05  | 0.004908315  |
| 0.031994709 | -0.006620387 | -0.012531082 | -0.000709693 |
| 0.003579144 | -0.008832712 | -0.014330344 | -0.00333508  |
| 0.005640171 | 0.00046611   | 0.000161654  | 0.000770566  |
| 0.039082026 | 0.005453358  | 0.000338216  | 0.010568499  |
| 0.001373682 | 0.000501796  | 0.000233762  | 0.00076983   |
| 0.001927424 | -0.01103579  | -0.017004651 | -0.005066928 |

---

**Table S7. Co-occurrence network characteristics**

| Analysis indicators                   | Pre-treatment | On-treatment | Post-treatment | BAP   | HTG-AP | MAP   | SAP   |
|---------------------------------------|---------------|--------------|----------------|-------|--------|-------|-------|
| The size of the graph                 | 173           | 155          | 162            | 364   | 751    | 416   | 750   |
| Order (number of vertices) of a graph | 101           | 103          | 107            | 160   | 176    | 170   | 172   |
| Connectance                           | 0.034         | 0.03         | 0.029          | 0.029 | 0.049  | 0.029 | 0.051 |
| Average degree                        | 1.966         | 1.761        | 1.841          | 4.136 | 8.534  | 4.727 | 8.523 |
| Average path length                   | 3.286         | 4.039        | 3.762          | 3.904 | 2.816  | 3.557 | 2.855 |
| Diameter                              | 8             | 9            | 9              | 10    | 6      | 10    | 6     |
| Average clustering coefficient        | 0.225         | 0.195        | 0.162          | 0.130 | 0.122  | 0.078 | 0.14  |
| Eigenvector Centrality                | 0.003         | 0.009        | 0.007          | 0.007 | 0.018  | 0.010 | 0.010 |

**Table S8. Functions of species co-occurrence networks of different etiologies and severities**

| KEGG pathway Description                               | # of genes from speices in the MAP network | # of genes from speices in the MAP network |
|--------------------------------------------------------|--------------------------------------------|--------------------------------------------|
| 1501 beta-Lactam resistance                            | 0                                          | 39                                         |
| 1502 Vancomycin resistance                             | 0                                          | 16                                         |
| 1503 Cationic antimicrobial peptide                    | 0                                          | 41                                         |
| 2020 Two-component system                              | 0                                          | 263                                        |
| 2024 Quorum sensing                                    | 0                                          | 113                                        |
| 2025 Biofilm formation - <i>Pseudomonas aeruginosa</i> | 0                                          | 53                                         |
| 2026 Biofilm formation - <i>Escherichia coli</i>       | 0                                          | 50                                         |
| 2030 Bacterial chemotaxis                              | 0                                          | 24                                         |
| 2040 Flagellar assembly                                | 0                                          | 45                                         |
| 2060 Phosphotransferase system                         | 0                                          | 58                                         |
| 3070 Bacterial secretion system                        | 0                                          | 45                                         |
| 4112 Cell cycle - <i>Caulobacter</i>                   | 0                                          | 12                                         |
| 4146 Peroxisome                                        | 0                                          | 10                                         |
| 5111 Biofilm formation - <i>Vibrio cholerae</i>        | 0                                          | 32                                         |
| 5171 Coronavirus disease - COVID-19                    | 0                                          | 22                                         |
| 5208 Chemical carcinogenesis - reactive oxygen species | 0                                          | 10                                         |
